# Supplementary material for: The archaeal Lsm protein from Pyrococcus furiosus binds co-transcriptionally to poly(U)-rich target RNAs
Source: publisher site journal article supplement (doi:10.1515/hsz-2023-0215), 2023-09-14
Supplement: Supplementary file 1 [file j_hsz-2023-0215_suppl_002.xlsx]

## Sheet: SmAP1 Strep-tag treated 1
Table S2. Mass spectrometry output of replicate 1 of Strep-tagged SmAP1 co-purified proteins.
Row	User Flag	OK	Accession	Protein	MW [kDa]	pI	#Alt. Proteins	Scores	#Peptides	SC [%]	RMS90 [ppm]	Rank	Sequence
1		TRUE	PFDSM3638_03360	methylmalonyl-CoA decarboxylase subunit alpha	57.0757	6.21093	1	3510.7 (M.score:3510.7)	41	64.9425	0.625511	1	MSMEEKVKDLYERKKKIMQMGGEEAIKKQHDKGKLTARERIELLLDPGSFVEIGMFVKHRATEFGMDKRELPADGVITGYGTIDGRLVFVYAQDFTVMGGSLGEMHAMKIKRIMELALEAGAPVIGLNDSGGARIQEGVDSLKGYGEIFKMNTILSGVVPQITAIMGPCAGGAVYSPAIGDFILMVDNPSTFMFITGPQVVKAVTGVEVSPVQLGGAMVHAQKSGQAHLIGKSDEEVIMLIKKLLSYLPSNNMEKPPKIKPKDEPFRRTPELYDIVPDDPNKGYDVRQVIYAIVDRDENGNPDFLELQPYFAPNAVIGFGRINGQPVGIVANNPIHLAGVLDIDSSDKIARFVRFCDAFNIPIVTLVDVPGYLPGVDQESRGIIRHGAKVLYAYAEATV…
2		TRUE	PFDSM3638_07050	DNA-binding protein	79.36	4.75616	1	1547.1 (M.score:1547.1)	25	44.3972	0.55169	2	MKKGLLAILLVGVMVLGTFGSGCIGGGTQTQTQTPTETGSPTQTTTPSGVTQAILELGKVTVVDTGTAIVVVGPKGEKPSVSIPSGKKVITVTYVVDEQNTPSVKELMEQGQGFGAINPAFFRDTNVDALVIAARRETNPEVRTEIFKALYILGNYYVPEVILGQNRQLRVYWDWVKGRYYHPTLPERYDLLWEDPNAPVVDTGIGSYKNDPETYVIATIGWPESFDPAWTYETFGWEIWHEIGDTLVTYWKEETEQVTPDLAVAWAHNKEGTEWYFVIRGGVKAYDPWNDKTYPIDATDVVFTFWRVARLGHSVSWMVTEFMNVSASQALTEEEFNNYVKNNPLIAEYNGKTAEIKSLQDLLNFFGYNGETAGVFKLVLPHPYAAVLNIVADPFLSVV…
3		TRUE	PFDSM3638_06330	hypothetical protein	34.7364	4.68587	1	1191.2 (M.score:1191.2)	17	55.8528	0.433724	3	MKPYLHRFMRDFIMGDTPEEVSELVLSTLNEFSIDLREILEINDYPIKITVIDTWEKVRGDRIIVLPYSELTDDGSLYFLKQDLEEAMDNPDLEKLKLLAWEMLVSKVSYLLYKNFEEIRSLNNRNDIAILASLLTTTTLLSLDDIKTIAATLEAKISVIKEDLESVDVLFSSIDVLRYDEQEAVYNEVRMKVIRAGAQFLDASIINWMFLQAITLAPLIDPKNEIKRLIKERVFSGDLSKKLDEVFSGIWAFYDLIKIVGKGRFELVELRDKILEYRQRLGLEFYPSTQDFFEKATVI
4		TRUE	PFDSM3638_09730	amylopullulanase	153.692	4.65351	1	1150.0 (M.score:1150.0)	25	19.262	0.606531	4	MSRKLSLLLVFLIFGSMLGANNIVKAEEPKPLNVIIVWHQHQPYYYDPVQGIYTRPWVRLHAANNYWKMAHYLTEFPDIHVTIDLSGSLIAQLADYMNGAKDIYQIISEKIANGEPLTYDEKWFMLQAPGGFFDHTIPWNGEPVTDENGNPIRDFWDRYTELKDKMLAAKQKYANLPLEEQKVAVTNEFTEQDYIDLAVLFNLAWIDYNYIISTPELKALYDKVDEGGYTREDLKTVLYHQMWLLNNTFKEHEKINLLLGNGNVEVTVVPYAHPIGPILNDFGWSEDFDAHVKKAHELYKKYLGGGVATPRGGWAAESALNDKTLEILAENGWQWVMTDQMVLERMGIPYSIENYYRPWVAEFNGKKIYLFPRNHDLSDRVGFRYSGMNQYEAVEDFIN…
5		TRUE	PFDSM3638_00140	phosphoenolpyruvate synthase	90.4279	5.152	1	1127.0 (M.score:1127.0)	22	29.8654	1.08328	5	MAYRFIKWFEELSKNDVPLVGGKGANLGEMTNAGIPVPPGFCVTAEAYKYFVENVKVSKEDVKRILGEKVNKGTISEVLAQAPDEPRPLQDWIMDIISKTDVDDSKMLQENTEAIRTLIKSLDMPSEIAEEIKQAYKELSQRFGQEEVYVAVRSSATAEDLPEASFAGQQETYLDVLGADDVIDKVKRCWASLWTARATFYRAKQGFDHSKVYLSAVVQKMVNSEKSGVMFTANPVTNNRNEIMINASWGLGEAVVSGAVTPDEYIVEKGTWKIKEKVIAKKEVMVIRNPETGRGTVMVKVAEYLGPEWVEKQVLTDEQIIEVAKMGQKIEDHYGWPQDIEWAYDKDDGKLYIVQSRPITTLKEEATAEEAEEVEEAEVILKGLGASPGIGAGRVVVIF…
6		TRUE	PFDSM3638_09745	maltotriose-binding protein	48.2131	4.62275	1	1045.2 (M.score:1045.2)	17	47.4654	0.74614	6	MRRATYAFALLAILVLGVVASGCIGGGTTTPTQTSPATQPTTTQTPTQTETQAVECGSGKVVIWHAMQPNELEVFQSLAEEYMALCPEVEIVFEQKPNLEDALKAAIPTGQGPDLFIWAHDWIGKFAEAGLLEPIDEYVTEDLLNEFAPMAQDAMQYKGHYYALPFAAETVAIIYNKEMVSEPPKTFDEMKAIMEKYYDPANEKYGIAWPINAYFISAIAQAFGGYYFDDKTEQPGLDKPETIEGFKFFFTEIWPYMAPTGDYNTQQSIFLEGRAPMMVNGPWSINDVKKAGINFGVVPLPPIIKDGKEYWPRPYGGVKLIYFAAGIKNKDAAWKFAKWLTTSEESIKTLALELGYIPVLTKVLDDPEIKNDPVIYGFGQAVQHAYLMPKSPKMSAVWG…
7		TRUE	PFDSM3638_07930	proteasome endopeptidase complex, archaeal,alpha subunit	28.9909	5.09432	1	980.0 (M.score:980.0)	15	53.0769	0.623185	7	MAFVPPQAGYDRAITVFSPDGRLFQVNYAREAVKRGATAVGVKCGEGVVLAVEKRITSRLIEPDSYEKIFQIDDHIAAASSGIIADARVLVNRARLEAQIYRLTYGEPAPVSVIVKKICDLKQMHTQYGGVRPFGAALLMAGINDRPELYETDPSGAYFAWKAVAIGSGRNTAMAIFEEKYRDDMNLEDAIKLALMALAKTMENPSADNIEVAVITVKDKKFRKLTRDEIEKYLSEVLKEVEEEEVKEKEEDYSELDSNY
8		TRUE	PFDSM3638_07175	NADH dehydrogenase subunit	47.9033	6.58872	1	976.2 (M.score:976.2)	19	41.9204	0.982236	8	MKKVEYWVKIPFGPIHPGLEEPEKFIITLDGERIVNVDVKLGYNLRGVQWIGMRRNYVQIMYLAERMCGICSFSHNHTYVRAVEEMAGIEVPERAEYIRVIVGELERIHSHLLNLGVVGHDIGYDTVLHLTWLARERVMDVLEAVSGNRVNYSMVTIGGVRRDIGEKQKRLILDMIKYYREVLPQIEDVFLHDSTIEARLRDVAVVPKKLAIEMGAVGPTARGSGIKEDSRWSEQLGVYPDLGIKPVTPEDVTGEKARGDVYDRMAVRIGELWMSLDLLEHALDQMPEGKIKTFPKDNILVAKLKLLGDGEGIGRYEAPRGELVHYVRGQKGRDGPVRWKPREPTFPNLFTIAKALEGNELADLVVAIASIDPCLSCTDRVAIVKEGKKVVLTEKDLLK…
9		TRUE	PFDSM3638_07725	hypothetical protein	30.2766	8.68511	1	964.5 (M.score:964.5)	17	54.6468	0.96687	9	MATPIGFFTAAIILLFILIFLSSAIKIVKEYERAVIFRLGRVVGARGPGLFFIIPIFEKAVIVDLRTQVLDVPVQETITKDNVPVRVNAVVYFRVVDPVKAVTQVKNYIMATSQISQTTLRSVIGQAHLDELLSERDKLNMQLQRIIDEATDPWGIKVTAVEIKDVELPAGMQRAMAKQAEAERERRARILLAEAERQAAEKLREAARIISEHPMALQLRTLQTISDVASDKSNVIVLTLPMEMLKLFKTLSEAAEAYREKVEKEKEKE
10		TRUE	PFDSM3638_09725	ABC transporter ATP-binding protein	41.308	6.9444	2	912.4 (M.score:912.4)	15	38.3784	0.699597	10	MAGVRLVGVWKQFGSFTAVKDLTLEVRDGEFLVLLGPSGCGKTTTLRMIAGLEEPTKGQIYIGDKLVADPEKGVFVPPKDRDIAMVFQSYALYPHMTVYENIAFPLKLRKVPKQEIDKRVREVAEMLGLTELLNRKPRELSGGQRQRVALGRAIVRRPQVFLMDEPLSNLDAKLRVKMRAELKKLQKQLGVTTIYVTHDQVEAMTMGDRIAVMNQGVLQQVGTPEEVYEKPANTFVAGFIGSPPMNFLDATITEDGFLDFGEFRLKLLPDQFEVLQDYVGKEVIFGIRPEDIYDALFAQVKIPGENMARGVVDIIENLGGEKIVHISIGGLIVTAKFPGESRVKEGDEIDIVFDMKKIHIFNKKTGKAIL
11		TRUE	PFDSM3638_08700	translation initiation factor IF-2 subunitgamma	45.01	8.10609	1	863.6 (M.score:863.6)	17	40.6326	0.741289	11	MGEKRKTRQAEVNIGMVGHVDHGKTTLTKALTGVWTDTHSEELRRGITIKIGFADAEIRRCSNCGRYSTSPICPYCGHETEFIRRVSFIDSPGHEALMTTMLAGASLMDGAILVIAANEPCPRPQTREHLMALQIIGQKNIIIAQNKIELVDKEKALENYRQIKEFIKGTVAENAPIIPISALHGANIDVLVKAIEEFIPTPKRDSNKPPKMLVLRSFDVNKPGTPPEKLVGGVLGGSIVQGKLKVGDEIEIRPGVPYEEHGRIKYEPITTEIVSLQAGGQFVEEAYPGGLVGIGTKLDPYLTKGDLMAGNVVGKPGKLPPVWTDLRLEVHLLERVVGTEQELNVEPIKRKEVLLLNVGTARTMGLVTALGKDEIELKLQIPVCAEPGERVAISRQIGS…
12		TRUE	PFDSM3638_00225	C/D box methylation guide ribonucleoproteincomplex aNOP56 subunit	46.7591	9.4204	1	775.5 (M.score:775.5)	15	44.7761	0.887461	12	MKAFISENVRGIYAFDENGNLIEKRYFTDKPEKVLDQLLKGEITKDLEELLNSLKEKGYDEFVFEHPELSRRAKELGFSATTEFPNIAGERLRSNPEEFLGENWFEEYYKVGVALTRMRIQEQSGARDKMVIQAIEALDDVDKVINLLVARLREWYSLHFPELDELLPKHPQYVAFVKTVGHRDNINEEVLRELGLSEEKIKKILEAKEKTMGAWMDQTDIEVVRQLAEEIDRLYQLRKKLEDYIDRAMDDVAPNLKALVGAKLAARLISLAGGLRELAMMPSSTIQVLGAEKALFRHLRTGAKPPKHGVIYQYPAINRSPWWQRGKIARALAGKLAIAARVDYFSGEYIAEELKKELEARIREIKEKYPKPPKRKREERKGKKPWKKDKKKKKKKEKP…
13		TRUE	PFDSM3638_09460	DNA-binding protein Alba	10.3786	8.00889	1	769.9 (M.score:769.9)	11	77.4194	0.97701	13	MAEEHVVYIGKKPVMNYVLAVITQFNEGAKEVSIKARGRAISRAVDVAEIVRNRFLKDTVDIKEIKIGTEELPTADGRTTNTSTIEIVLERKV
14		TRUE	PFDSM3638_07765	small nuclear ribonucleoprotein	8.43766	6.06492	1	769.1 (M.score:769.1)	9	88.1579	0.742897	14	MAERPLDVIHKSLDKDVLVILKKGFEFRGKLIGYDIHLNVVLANAELLQDGEVVKKYGKIVIRGDNVLAISPTEEG
15		TRUE	PFDSM3638_09940	thermosome subunit	59.9438	4.89907	1	766.8 (M.score:766.8)	17	44.2623	0.887301	15	MAQLAGQPILILPEGTQRYVGRDAQRMNILAARIVAETIRTTLGPKGMDKMLVDSLGDIVITNDGATILDEMDIQHPAAKMMVEVAKTQDKEAGDGTTTAVVIAGELLRKAEELLDQNIHPSIIIKGYTLAAQKAQEILENIAKEVKPDDEEILLKAAMTSITGKAAEEEREYLAKLAVEAVKLVAEKEDGKYKVDIDNIKLEKKEGGSVRDTQLIRGVVIDKEVVHPGMPKRVEKAKIALINDALEVKETETDAEIRITSPEQLQAFLEQEERMLREMVEKIKEVGANVVFVQKGIDDLAQHYLAKYGIMAVRRVKKSDMEKLAKATGAKIVTNIRDLTPEDLGYAELVEERKVAGESMIFVEGCQNPKAVTILIRGGTEHVVDEVERALEDAIKVVK…
16		TRUE	PFDSM3638_07005	S-layer protein	65.6784	4.37655	1	732.0 (M.score:732.0)	12	28.2645	0.851887	16	MKVKKIAALAVGAAVAGATLGFASAQGEVPEIPKDFFVKDGKPNVKIVVGSEGAAMDVVSAADIAAAIGSLLYTEKDVEVTDATVVARKDVTEPIEKIPVFDNYDTNTAHKYKVGDNLKDVPAWWNGSDFVANFSTSVWNDGVYDKAVEIRIDNIGSVGSYDLAANLTLKGIALDGITDSEVDVIDDFEDFTVNVSTVVANISLVVYNYTLKGQPTVDKITKDETIPEVNLITNLFLDNSTLAKFYPDYDGYTIEGVKVLKSGVGEGETLKILDNEYPIVFIGKDIQETACGDCFTYGKDWGEDYYNQGETYNFGDYKVTILDIDVARDKAFIKVESPSGDTETTTLAVGGTEAQTFFDGGIRIQIKDTFVGISGTNAVKLHVWTDLKTVKSGDEIMPG…
17		TRUE	PFDSM3638_00220	fibrillin	25.7458	7.81556	1	628.0 (M.score:628.0)	10	50.2203	1.14618	17	MVEVKKHKFPGVYVVIDDDGSEKIATKNLVPGQRVYGERVIKWEGEEYRIWNPHRSKLGAAIVNGLKNFPIKPGKSVLYLGIASGTTASHVSDIVGWEGKIYGIEFSPRVLRELVPIVEERRNIIPILGDATKPEEYRALVTKVDVIFEDVAQPTQAKILIDNAKAYLKRGGYGMIAVKSRSIDVTKEPEQVFKEVERELSEYFEVIERLNLEPYEKDHALFVVRKP
18		TRUE	PFDSM3638_08920	ABC transporter substrate-binding protein	37.9468	4.86585	1	617.2 (M.score:617.2)	11	50.578	0.675191	18	MKRAIPVFLLIVLVWISGCIGGGTSTIPTTPSAPETTTITKTEKVVETVTQTVTVTQTMTPQKYPITIVDSLGREVKIEKEPERIVSLAPSITETLYFIGALDKVVGVTKFDDFPPDVKEGRTIIGGFSDPNIEVIASLNPDLIIGTSMHMQYLDKLQEIAPVIIVDPKNIDEIYEWIIKLGKVVNREEEAVGVVNYMKAIVEDVESKVSNASRPKVFYLLGYWDGYWTTGKGTFIDSLITMAGGENIFSDIEGWKKVSAEDIVARNPEVIIISYHAGVNPGDLCNTPLANTDAVKNGRVYVISDDNIISRPGPRIVLALQEIAYFIHPEAFNYAYQPKACAVASS
19		TRUE	PFDSM3638_01310	FAD-dependent oxidoreductase	53.7309	7.17373	1	615.8 (M.score:615.8)	12	34.1615	0.90423	19	MEKFDVIIIGAGPAGLFAAYELVERSNMKVLIIDEGGDVDQRVCPMDQLGYCIGCKPCHIMSGVGGAGGLSDGTVNLRPDIGGDLTELTNDENYSWQLVWEVDQILLKHGAPRNLYKGDPDQIRYWERKAAQAGVKFIPIIQRHIGSDNTPRVIKSIKQYLESKGVKFLLWTKALEFNKGWVKVRRGKDVFTIEGKYIIVAPGRGGAEWFHEIAQKIGLKARHGPIDVGVRVEVPAIIMEPITSINHDPKFHIYTDTYDDFVRTFCTNPYGFVVEERYDGYVGVNGHSMRNKKSNNTNFAFLTRIELTEPVEDTTAYGRSIAQLATTIGGGRPILQRLGDLRRGRRSTWSRIRKSNVEPTLKHVTPGDIAMALPHRVVTNIIEGLEKLDKVIPGVASDH…
20		TRUE	PFDSM3638_01370	pyrolysin	154.378	4.45794	1	592.9 (M.score:592.9)	11	10.0143	0.940774	20	MNKKGLTVLFIAIMLLSVVPVHFVSAGTPPVSSENSTTSILPNQQVVTKEVSQAALNAIMKGQPNMVLIIKTKEGKLEEAKTELEKLGAEILDENRVLNMLLVKIKPEKVKELNYISSLEKAWLNREVKLSPPIVEKDVKTKEPSLEPKMYNSTWVINALQFIQEFGYDGSGVVVAVLDTGVDPNHPFLSITPDGRRKIIEWKDFTDEGFVDTSFSFSKVVNGTLIINTTFQVASGLTLNESTGLMEYVVKTVYVSNVTIGNITSANGIYHFGLLPERYFDLNFDGDQEDFYPVLLVNSTGNGYDIAYVDTDLDYDFTDEVPLGQYNVTYDVAVFSYYYGPLNYVLAEIDPNGEYAVFGWDGHGHGTHVAGTVAGYDSNNDAWDWLSMYSGEWEVFSRL…
21		TRUE	PFDSM3638_05725	proteasome assembly chaperone family protein	29.9675	4.87974	1	553.2 (M.score:553.2)	10	44.1948	0.91104	21	MKETTIVVYERPDIYDPIFIEGLPGIGLVGKLAAEHLIQELKAKKFAELYSPHFMHQVLIRKNSVVELMKNEFYYWKSPDDEHRDLIIVTGDTQVPPTDSYGHFEVAGKMLDFVQEFGTREIITMGGYQVPEIQGEPRVLAAVTHEDLIEYYKSKLEGCSVEVIWREDEGGAIVGAAGLLLGIGKLRGMFGISLLGESLGYIVDAKAAKAVLSAVTKILGLEIDMTALDERAKETEEILRKVEEMQRAMMEQVTPKLPHEEEDRGYL
22		TRUE	PFDSM3638_08940	serine hydroxymethyltransferase	47.9564	5.85226	1	542.5 (M.score:542.5)	10	37.7049	0.90577	22	MTYKEYRDKVLNFIEEHEKWRSHTINLIASENITSPSVNRAVASGFMHKYAEGWPKQRYYQGCKYVDEVELIGVELFTKLFKSDYADLRPISGTNANQAVFFGLGQPGDKVIVLHTSHGGHISHMPFGAAGMRGLEVHTWPFDFESFNIDVDKAEKMIRELEPKIVMFGGSLFPFPHPVKELAPVAKEVGAFVVYDAAHVLGLIAGGEFQDPLREGADIMTASTHKTFPGPQGGVILYKKFADDETIAKLQWAIFPGVVSNHHLHHMAGKVITAAEMLEYGEAYAKQIVKNAKALAEALAEEGFKVIGEDQGYTKSHQVIVDVSDLHPAGGGWAAPLLEEAGIILNKNLLPWDPLEKVNEPSGLRIGVQEMTRVGMMEDEMREIAHFIKRVLIDKEDPK…
23		TRUE	PFDSM3638_08290	hypothetical protein	37.6996	4.40122	1	540.9 (M.score:540.9)	7	30.6785	0.473846	23	MSIIQDIIGRIVVLRGGQYSVEVDVVTDESFGRFAAPIDENPALYIAEARRAVSEVDEIIGPELIGFDAIDQELIDSYLWEIDGTDNFSHIGANTALAVSVAVAKAAANSRNISLYSYIGGTFTTELPVPVVTFGADENFEYHVIVRDLLEVTDIIDAVVRLLDFSLSLEELSKASEQVGLELGLEVSLGITMRKELETEKVLEIVEDYNIAYIKPIGTPELFLELIAGTHGVFIDGEYLYRKYNILDRKYYNALSIKPINLGTLTDLYNFVNDVKAEKITPILSESKYEPADETLPHLALGLRCPAMLIHMNSVEKINELNRIAEELGERGRIITFEE
24		TRUE	PFDSM3638_00270	phosphoserine phosphatase	36.8382	9.3278	1	523.0 (M.score:523.0)	9	35	1.18524	24	MQVKVDPEEIRRIKQELEELQREKRDIEFKLEELQKELNVWIQKRDEKNLEVRRLREKAREFKAKRDEINQKIKELKKNKEEINAKLDLLYQEALEYKTKRDEFKQLRRLKMPKEKIEERIEKLEWELQTNPNITPEREKQIVDQIQVLATELEIIQQVERFNNKLQEVRKKIEQLKKARRAISLEIQQLANQSQQFHEQMIKTYQKADEVKKEADEYHQKVLEIREKIREVRRELRELERKILEYDQKHKELLAYKLAARLLSKRDANFEKAVQALEKFKRGEKLTLDEILLLQRYNLV
25		TRUE	PFDSM3638_06320	5-methyltetrahydropteroyltriglutamate--homocysteine methyltransferase	35.451	5.20947	1	514.2 (M.score:514.2)	9	33.3333	0.482146	25	MIVPALIGSLPRPIGLAKKLEQYYIGRLDERKLEEAYREYTRRAFEKLRDAKIKVITDGLYRWDDIFNPFIRFIDGIEVNGLFKFYENNFFYRSPVVRGEIALKENPIPEWISIAQEIKEDVYPEATLKAVLPGPVTLAYHSINEYYKTLTDLAEAYAQVIGELIKELDVKIVELQEPSLAAEISEATKNIEDRVDKEVAKNIIEDLGRIKKLWVVTYFGTPQVLPEGVILNVDLIEGSVPEEYSGEIGLGIVDARTTKMERADRLRDKIRKYLAKFETIYVTPNTLLDFLPESVAWKKLRLLGRLGGE
26		TRUE	PFDSM3638_07545	30S ribosomal protein S19e	17.3515	9.69352	1	487.6 (M.score:487.6)	8	50.6667	0.447751	26	MATVYDVPGDLLVERVAQRLKEIPEIKPPEWAPFVKTGRHKERLPEQEDWWYYRVASILRRVYLDGPVGIERLRTYYGGRKNRGHAPEKFYKAGGSIIRKALQQLEAAGFVEKVPGKGRVITPKGRSFLDKIATELKKELEEIIPELKKY
27		TRUE	PFDSM3638_08590	BMP family ABC transporter substrate-bindingprotein	44.1739	5.15414	1	484.6 (M.score:484.6)	12	35.4271	0.650373	27	MRKVGITLSVVALVIMGFVAGCIGGTQTQGEKVKVAVLFDVGGRGDLSFNDMAYLGAERAKKELGVEVEYMTPKSREDMVPLLKQLAESKEYDLLVLIGFLWTTPLDQVADQYPDQKFALIDSTTGKVRENEVDILFREQEAAALIGVIASGMAYELGGDTIGAVAGMDIPPLWKFHIGYLYGAKYFEKKTGKPVKLLWQYTGTFTDTQVGYTTGMQLLQQGAKVLYGLAGLTHVGMFDAVIDWNKQGKGKALAIGQDASQEWYAPEYIPISGAKRVDVAVYTAIEMVVKNQWKGGIMTLGLKEGGVGYWNLDGVRQFAEFAQEGGKLKDMTPEDVVRIVKEQREKYIKPEVWEIVRELEEKIKNGEIKFKTPQSHDEYEQIIKELEKGNLDAALEKE
28		TRUE	PFDSM3638_00520	ABC transporter substrate-binding protein	61.2235	5.59228	1	482.5 (M.score:482.5)	12	27.1719	1.08021	28	MKHKAVFLLVVLISGVLASGCIGGETKETQASKKVQLTGDFAKDVIKIGKVLEENGISEVKFSAWGSGDPNSVMRVYGIVDAAYKINKIWKENGISVKITVTVKYDQSFNDQYKEFLSKQPLGQAGDFFVNSYAFLSTLAEEGYILDITDYAQAYQSVINDFYPTLLDASKYNGRLYGLPQDTEARPFYVRKDVAQCVGLDVSQLPEKVKNGEFTWSDVYYWAKQAKEKGCAEWGLIHRKGSAHPDLIQFIFAFNGKLYDENTGKLVLDVPAVYKWLYVEWKFARDGLLPEDIMSWDWAKQIHPTIVEGKTLFDIGGTWYWTEWQTKQYYKGRSLTPEEVKEWFAYTLFPAGEKGAKPVTLSQPFIWMINSKAGQLNPKYEELKDVYQALAFLMIIKAS…
29		TRUE	PFDSM3638_05625	type I-B CRISPR-associated proteinCas7/Cst2/DevR	39.8459	6.12634	1	457.4 (M.score:457.4)	9	31.0541	1.48103	29	MKFAAGFVLIDAPHSALNMLGIDENLPDRNVTRVKTLRRGGNRYVYVSPQAWRYWWRTTLKEYFKWELSPLFREEKQVFTAANPIKYPDDDVFGYMRAYKKNNVNVTVTRVSPLKNTPLISVLPDRSSLTIDEGYASRHEGDPVPYSQEFYSTVLKGAFSLDLDLVGRFTTKNKAGYKNLLTRSDIPKKGKAGEIVKEIEELEKLAREIGVEIKEEEWIMPKEVRKKRAVETIKALRYLTGGAKQTQYHTDVTPKFFLGIIVNGGINPFISGIVREEKGEIILDAEALATRLEDFSEIIDSELFLGYDKGFVKELGLDIEALKSAVSIEVMEGKVGEVIESFAEEAGKYYL
30		TRUE	PFDSM3638_09075	30S ribosomal protein S5	26.5341	9.58308	1	445.8 (M.score:445.8)	10	40.2542	0.898349	30	MSQEWKEYAKRVLDEWEPKTKLGMMVKEGQITDIHEIFRRGYQIKEPEIIDVLLPEVNARENQEVLDIALTVRMTDSGRRVRFRVLAAVGNRDGYVGLGIGHGKEVGIAIRKAINYAKLNIIEIKRGCGSWECRCRRPHSVPFAVEGKEGSVRVRLIPGPRGLGLVIGDVGKKILRLAGVQDVWSQTFGETRTTVNFAKAVFNALYNTNRVAISPEMIERYGIVVGRAMPTTFTLE
31		TRUE	PFDSM3638_05645	type III-B CRISPR module RAMP protein Cmr4	32.6095	5.5942	1	437.5 (M.score:437.5)	8	33.2203	0.708443	31	MKAYLVGLYTLTPTHPGSGTELGVVDQPIQRERHTGFPVIWGQSLKGVLRSYLKLVEKVDEEKINKIFGPPTEKAHEQAGLISVGDAKILFFPVRSLKGVYAYVTSPLVLNRFKRDLELAGVKNFQTEIPELTDTAIASEEITVDNKVILEEFAILIQKDDKGILESVVKAIEQAFGNEMAEKIKGRIAIIPDDVFRDLVELSTEIVARIRINAETGTVETGGLWYEEYIPSDTLFYSLILVTPRAKDNDMALIKEVLGKINGKYLQIGGNETVGKGFVKVTLKEVTNNGGTHAK
32		TRUE	PFDSM3638_00615	lysine--tRNA ligase	61.0154	5.80569	1	416.5 (M.score:416.5)	8	21.0325	1.20027	32	MVHWADYMAEKIIKERGEKEEYVVESGITPSGYVHVGNFRELFTAYIVGHALRDRGYNVRHIHMWDDYDRFRKVPKNVPQEWEEYLGMPVSEVPDPWGCHDSYAEHFMGLFEEEVAKLEMDVEFLRASELYKKGEYAEEIRKAFEAKGKIMAILNKYREVAKQPPLPENWWPAMVYCPEHRKESEIIDWDGEWGVKYRCPEGHEGWTDIRDGNVKLRWRVDWPMRWAHFGVDFEPAGKDHLAAGSSYDTGKEIIREVYGKEAPLTLMYEFVGIKGQKGKMSGSKGNVILLSDLYEVLEPGLVRFIYAKHRPNKEIRIDLGLGLLNLYDEFDRVERIYFGIEKGKGDEEELKRTYELSVPKKPKRLVAQAPFRFLAVLVQLPHLSIEDIIFTLVKQGHVP…
33		TRUE	PFDSM3638_04855	pyruvate ferredoxin oxidoreductase	44.149	5.02853	1	412.4 (M.score:412.4)	8	23.7374	1.71741	33	MPIRKVMKANEAAAWAAKLAKPKVIAAFPITPSTLIPEKISEFVANGELDAEFIKVESEHSAISACVGAAAAGVRTFTATASQGLALMHEILFIAAGMRLPIVMAIGNRALSAPINIWNDWQDTISQRDTGWMQFYAENNQEALDLILIAYKVAEDERVLLPAMVGFDAFILTHTVEPVEIPDQEVVDEFLGEYEPKHAYIDPARPITQGSLAFPAHYMESRYTVWEAMERAKKVIDEAFAEFEKKFGRKYQKIEEYKTEDADIIFVTMGSLAGTLKEWIDKKREEGYKVGAAKITVYRPFPVEEIRELAKKAKVLAFLEKNITIGLYGAVFTDASAALINESEKPLMVDFIVGLGGRDVTFNQLDEALEIAEKALKEGKVENPINWIGLRWELVK
34		TRUE	PFDSM3638_01020	enolase	46.8062	4.9826	1	409.6 (M.score:409.6)	8	30.2326	0.820495	34	MENPYEIVGVVAREILDSRGNPTVEVDVYTHVGMGRAAVPSGASTGTHEALELRDGGKRYHGKGVRRAVENVNKIIAPELIGMDVRWQREIDALLLELDGTENKSNVGANAILAVSLAVAKAAANSLELPLYQYLGGVNAYVLPVPLSNVINGGVHAGNDLDFQEFMIMPIGADSFREAIRWVSETYHVLKKVIMEKYGKNAVNVGDEGGFAPPMKEVTEPLDVLIKAIEEAGYKPGDEIALALDVASSELFNEETGKYVVGGKEYDRGELLELYKDLTSTYPIVSIEDPFHEEDWEGFVMITKELGHKVQIVGDDLFVTNPKRLRKGIELGAANALLLKVNQIGTLSEAMDAAFTAFRAGYGVIVSHRSGETEDATIADLAVALNAGQIKTGAPARSD…
35		TRUE	PFDSM3638_04980	phenylalanine--tRNA ligase subunit beta	63.9232	4.88134	1	404.2 (M.score:404.2)	10	24.8201	0.53879	35	MPKFDVAKSDLERLVGREFSVEEWEDLVLYAKCELDDVWEEDGKIYFKLDSKDTNRPDLWSAEGVARQIRWALGLAKGLPKYEVEESDVVVYVDKKLRNIRPYGVYAVVEGLKLDEEALSQLIQLQEKVALTYGRRRREVAIGIFDFDKVKPPIYYRAAEKTEKFVPLGYSEEMTLEEILEKHEKGREYGHLIRDKPYYPLLVDSEGNVLSMPPIINSELTGRVTTETKNVFVDVTGWDLRKVMLALNVIVTALAERGGKIKRVKVIYPDFEITTPDLTPKEFEVSFEYIRKLSGLELSNEEIKELLERMMYEVEILSENKAKVKYPAFRDDIMHTRDVLEDVLIAYGYNNIDPEEPKLAVQGRGDPFKDFEDAIRDLMVGFGLQEVMTFNLTSKEVQF…
36		TRUE	PFDSM3638_09690	DNA repair and recombination protein RadA	38.3754	6.1964	1	394.6 (M.score:394.6)	8	33.5244	0.647055	36	MAGEEVKEIDEFEELGFEPATEETPKKKKKEKIIRSIEDLPGVGPATAEKLREAGYDTLEAIAVASPIELKEVAGISEGTALKIIQAARKAANLGTFMRADEYLKKRATIGRISTGSKSLDKLLGGGIETQAITEVFGEFGSGKTQLAHTLAVMVQLPPEEGGLNGSVIWIDTENTFRPERIREIAQNRGLDPDEVLKHIYVARAFNSNHQMLLVQQAEDKIKELLNTDRPVKLLIVDSLTSHFRSEYIGRGALAERQQKLAKHLADLHRLANLYDIAVFVTNQVQARPDAFFGDPTRPIGGHILAHSATLRVYLRKGKGGKRIARLIDAPHLPEGEAVFSITEKGIED
37		TRUE	PFDSM3638_07910	RNA-binding protein	30.4881	4.66953	1	391.5 (M.score:391.5)	10	59.9278	0.47297	37	MSNDEIVAGIMRDYILNLLKEKKRIDDRGFEDYRPIEVEVGVIEKAEGSALVKLGNTQVLVGIKATLGEPFPDTPNMGVMTTNVELVPLASPTFEPGPPDERAIELARVIDRGIRESRALNLEKMVIAPGKIVRVVFIDVHVLDHDGNLMDAIGIGAIAALLNARVPKVLYNEETGEVEILEEKEPLPVEKIPIPVTFAKIGNYLVVDPTLEEEQIMDGRLTITTDETGHISAVQKSEGGAFKLEEVMYAVETAFKKAEEIRKIILNALEKANNSEE
38		TRUE	PFDSM3638_09900	tetratricopeptide repeat protein	39.2778	4.47941	1	389.0 (M.score:389.0)	8	23.0539	1.08321	38	MVEEKIKEAIKNRDCETILELLDEYLEQIEDEEKLREALKEIGEAAVECEDFDIIHEISHLYEHLGEPEKGIELYKKIVERRKGDKEKYAEALYYLAEEYEHMGMPEEALKIYQELLEIEKELGNEREIALTLANIAVVKDELGEADEAIKLMSEAKDIFEKINDTKNYHIALIDLAHFYYELGEYEKAMQIIEEVLRNPLDDEIEVHGRLVESEIHSALENYKKAALSLRNALLRSGDDEYLFETAFEAVLEFIEELYNEEKYAELKEVASLFAELFEDDTKFFFQAIEKLAEWKLGKEEAKKEFEELYNKIENEEMKEFLDELKKPKVNLSL
39		TRUE	PFDSM3638_00420	hypothetical protein	36.6828	4.4966	1	375.0 (M.score:375.0)	6	23.1013	0.702982	39	MTSEDIINALKAGNIEKAKELLTKEIDRLTDEELREVLEVAEEVAKEKRDLELYKLVVYYYAEFFGISKLHEFEEFARKFETKGLLHVADLYSLLGYPEKALEIYEGVLAEEKRPEIVGEVYYSIAAIYEELQEYEKAIEFIRKAIEEFKAANAKRKELQARVYEGYLLYESGDKVKAKEILAKLLAEVEDKELIAQIHLAFEEMFEDEENYEAAFHECLYAMINSKDSDFFEIAFDGLVDLIWQAIIDDSFEEIYNSMPMFKVAFPELSDFFEGVRLIALYKDGKAGREDVSAILDRIKDERLLSILEFLGEAEL
40		TRUE	PFDSM3638_09115	30S ribosomal protein S4e	28.1282	9.88866	1	363.2 (M.score:363.2)	7	36.214	0.837372	40	MARKGPKRHLKRLAAPTSWYIERKAYKWAVRPRPGPHNMRTSIPLLYIVRDYLGYAKTAREARKILNEGKFLVDGRVRKDYKFPVGIMDVVSIPETGEHYRVLPNRIGKLILHPISEDEAFIKPLRIRNKRMIKGARVQLNFHDGTNHIVSIAEKDNYFTSYTVLMKVPEREILEVLPFEKGAYVFVTQGKNVARKGRIVEIKRFPMGWPDVVTIEDEEGELFDTLKEYAFVVGTDKPKISLP
41		TRUE	PFDSM3638_01200	30S ribosomal protein S24e	11.6722	7.84194	1	363.2 (M.score:363.2)	6	55.5556	0.697514	41	MEIRIKEIKENKLIGRKEIYFEIYHPGEPTPSRKDVKGKLVAMLDLNPETTVIQYIRSYFGSYISKGYAKAYDSKERMLYIEPEYILIRDGLIEKKEGE
42		TRUE	PFDSM3638_07920	RNA-binding protein	29.5159	8.88667	1	354.5 (M.score:354.5)	8	42.803	1.24383	42	MRRIFVQNRELVVPGTLLAQGPYKNGRGTFKEGSRIYSTVIGLVDIKGNTIRVIPLEGPYIPEVGDNVLGKIVDVKFSSWTVDIGSPYSATLKIQDYTDEKIDLLRTDLRKFFDIGDIIYAKVKGINEVNNIELTTKGMPFNGGPLRGGQIIKITSSKVPRVIGKGGSMINMIKKLTQSRIIVGQNGWIWISSKNPELEKLAIEAILKIERESHTRGLTDRIKNMLLSKLQELKERGVIEEIPSLEEETQEETVMENDVEARGP
43		TRUE	PFDSM3638_00740	proteasome endopeptidase complex, archaeal, betasubunit	21.6353	5.16407	1	352.5 (M.score:352.5)	4	15.8163	1.10966	43	MEKKTGTTTVGIKVKDGVVLAADTQASLDHMVETLNIKKIIPITDRIAITTAGSVGDVQMLARYLEAEARYYYFTWGRPMTTKAMANLLSNILNENRWFPYLVQIIIGGYVDEPTIANLDPFGGLIFDDYTATGSGTPFAIAVLEEGYREDLTIEEAKELAIRAVRAAGRRDVYTGSKKVQVVTITKDGMKEEFVV
44		TRUE	PFDSM3638_03205	type I-A CRISPR-associated protein Cas7/Csa2	37.4246	6.35619	1	351.6 (M.score:351.6)	8	35.1906	1.42571	44	MMYVRISGRIRLNAHSLNAQGGGGTNYIEITKTKVTVRTENGWTVVEVPAITGNMLKHWHFVGFVDYFKTTPYGVNLTERALRYNGTRFGQGETTATKANGATVQLNDEATIIKELADADVHGFLAPKTGRRRVSLVKASFILPTEDFIKEVEGERLITAIKHNRVDVDEKGAIGSSKEGTAQMLFSREYATGLYGFSIVLDLGLVGIPQGLPVKFEENQPRPNIVIDPNERKARIESALKALIPMLSGYIGANLARSFPVFKVEELVAIASEGPIPALVHGFYEDYIEANRSIIKNARALGFNIEVFTYNVDLGEDIEATKVSSVEELVANLVKMVGGKE
45		TRUE	PFDSM3638_09390	topoisomerase	33.1244	4.65992	1	343.5 (M.score:343.5)	7	31.1419	0.841913	45	MTIVDVRILVEGASDVEVVSKALQGLALGSEYNITISSIIPTTNVEIAKSAAAGADLLIIATDADRVGRELAERLFTELSEMVGHIERMKLPLGHDLEHVDVELVRKELRNALVRAGLKTLQRIPEYMELRRDYLDLKGKYEEIEKEKEDLLQKIEELKAKLEEIEEEYARVKEENLELRELLKKRAKVYKLEEKWKEMFPGIKMPSIDIFSRAIETLGFAGKIIVGQGHVYAEDDHILEQLFKTVYLSLQLTQSIEREEENIEVIEGEEEKLEEEVEVIENEGENIEE
46		TRUE	PFDSM3638_00500	proteasome-activating nucleotidase	44.7769	6.02818	1	342.6 (M.score:342.6)	9	30.5556	1.08235	46	MSEDEAQFHGNYDDYVTYLKRRIRQLELQVRMLEADKERLERELSRLRSEMSRLRQPPAFAGSVIEVLDDDRAIVQNYNGPRFVVRIAPWIDKSKLRPGTRVALDQRTMAIIEILPASKDPAVLGFEVVERPNVTYNDIGGLKKQLQELREAIELPLKHPELFEEVGIDPPKGVLLYGPPGCGKTLMAKAIAHEVNATFIRVVGSELVRKYIGEGARLVHELFELAKEKAPTIIFIDEIDAIGAKRLDETTGGEREVNRTLMQLLAEMDGFDPRGNVKVIAATNRPDILDPALLRPGRFDRLIEVPLPDFEGRLEILKVHTRRMKLRGVDLRLIAELTEGASGADLKAIATEAGMFAIRERRTYVTQEDFLKAIDKVLGNEKKIIQQIMSHEVIYG
47		TRUE	PFDSM3638_02475	transcriptional regulator	30.5873	5.55244	1	325.3 (M.score:325.3)	6	28.0303	0.433179	47	MSKDRMVELLQEHFELNLYEARAYVALVAFGVLTPAELASVSEVPAPRTYDVLRSLEKKGFAMTQPGKTNKYRPVHPANVLEKFIQDWQERVKEELEAKKKAKEELLELMAPLIETEVPKYGVERVWVVRGIKNSTLKTKEMLEEAQNEILLADDGFIAVNLEDDIIKAVDRGVKTKILLTKNLLPRLKASKIIDYAKEGKLELRALDKFDLPMLICDEEVFFALEDLAARYFNYETQVWIKDHRVVALFKEKFNEYWEKAEKV
48		TRUE	PFDSM3638_00630	rubrerythrin	37.3278	5.40183	1	319.2 (M.score:319.2)	6	25.6966	0.720079	48	MENDLKKLTKEIVGRLKNKSVKELLSYAIFNEEEEAKFYADLAEKVSRPSVKALFRRMSEESKVHELLLRKLFSKYFPGEEPVKVDVPPVEVVPFISKFESIEDYLEGLRYCMESELFAKRTYVLLSQVAENEGVRMVANELASIEQNHYEEIKAVYELVKTFRDREMLPESLKSGAYLITNESVGKYLILDLIDENKKLKLFVRENPEIFRRLIGENPNVEITWIAKVNAPNTISPTETHVLKKDIESFFEKVTKEGKKGVVFIQNVAYLVANLGFKETVDLLLHAKDLAVYYGGYLIITANPEVFEKTEWALLKLEFEVLF
49		TRUE	PFDSM3638_04350	NDP-sugar synthase	47.1908	5.11814	1	310.5 (M.score:310.5)	7	20.339	1.36391	49	MKAVILAGGFGTRLRPISSTRPKPMVPVLGKPNLQYILEALEKVSEIDEIILSVHYMRGEIREFIQERMVDYPKDIRFVNDPMPLETGGALKNVEDYVSDDFLVIYGDVFTNFDYSELIKAHKENDGLITVALTKVYDPERFGVVIVDEEGKIIDFEEKPRKPKTNLVDAGIYMVNKEVLKEIPKNKEVYFEREILPKFVSQGLVYGYRMPKEYYWIDLGTPEDLFYAHQIALDQLSRENGYMILGENVEIPEDVEVQGPVYIDNNAKIGHGVKIKAYTYIGPNTIIEDKAYIKRSILLGSDIIKERAELKDTILGEGVVVGKNVIIKENAVVGDYARINDNLVIYGAKILPWKKVEEYEAYIRIKLDPTKVRPELTPERCPLGLPECIYKKFKAIAGE…
50		TRUE	PFDSM3638_07070	ABC transporter ATP-binding protein	37.6196	8.76212	1	308.2 (M.score:308.2)	7	20.3647	1.51368	50	MEYDRDVVLKVENLKKYFPVRGLIRTIGWVKAVDGVSFEIRRGETFGLVGESGCGKTTTGRTILRLIEPTDGKIIFMGKDVTKLKGEELKWFRRKAQIMFQDPYSSLNPRQTVFEIIMEPVKFHGIQVDDPEEFVIKLLESVGLNETHLYRYPHEFSGGQRQRIALARILALRPEFIVLDEPTSALDVSVQANILNMLKDLQKEYGFTYLFISHDLGVVKYMSNRIGVMYLGKLVEVGPADKLFENPLHPYTQMLFSAIPIPDPDIAREMKKKRMKVTGEPPSPINPPSGCRFHPRCPYFKAGVCDKKEPPMVEVEKDHYVACWLYAKA
51		TRUE	PFDSM3638_05650	TIGR01897 family CRISPR-associated protein	56.2316	5.82011	1	306.9 (M.score:306.9)	7	12.5	1.018	51	MGMRVLVTTWGNPFQWEPITYEYRGIKVKSRNTLPILVKTLEPERILILVADTMANYYDSGKNKPEIEEKSFSSYSEVVEDTKERILWHIKEEVIEELREEDPELAKKIENMLKDERITIEVLPGVGVFGNITVEGEMLDFYYYATYKLAEWLPVQNNLEVYLDLTHGINFMPTFTYRALRNLLGLLAYLYNVKFEIVNSEPYPLGVSQEIREDTILHIREIGEGVVRPRPQYSPVEGKLYWNAFISSVANGFPLVFASFYPNIRDVEDYLNKKLEEFLVGIEVGEREDGKPYVKREKALDRSFKNASKLYYALRVFNTKFQNYPKKEVPIEEIMEISKIFESLPRIGIILERQVEWLRNLVYGRLWYENGEQKIKKGLLEIIKDKKDKRKEAEALKKG…
52		TRUE	PFDSM3638_07915	exosome complex exonuclease Rrp41	27.83	8.93505	1	305.6 (M.score:305.6)	7	30.8	0.621737	52	MMLKPEGLKLIDENGRRLDGRKKYELRPIKMKVGVLKNANGSAYIEWGKNKIIAAVYGPREIHPKHLQRPDRAILRVRYNMAPFSVEERKKPGPDRRSIEISKVIRGALEPALILEMFPRTAIDVFIEVLQADAGTRVAGITAASLALADAGIPMRDLVAACSAGKIEGEIVLDLNKEEDNYGEADVPVAIMPIKNDITLLQMDGYLTKEEFIEAVKLAIKGAKAVYQKQREALKEKYLKIAQEVEGSEQ
53		TRUE	PFDSM3638_09735	sugar transporter	45.1264	8.46209	1	302.7 (M.score:302.7)	7	26.506	0.65935	53	MRRDELIKSGIMTFLAIVVMFLILFPVYYIFTVSIKPAATIATTELDLIPDKVTGEAYGEVLFGLKGTRISEEFTGTLEGSAKIVGGKLQVENGVIKGEVKYGPFTGIRFEVPVSGLSFELSQQVNEVQGNLKAEISGIISLTRVNSDGTIGLGVIKNVTLKSGEVNGLKISEGKLAGFIRIRDSGKAELTAIGKFVNSKFFHHLRNSLILATLTVFLTLLFVVPAAYAFSRLKFFGREHILYFYLMFTQVAGGLGIAGLIALYGMLVKLGLYNKLPALAIIYAAGSVPFNTWLLKSYIDSISPDFDEAALVDGASYLQIIRYVLLPMALPGIATVAVMSFIGGWTEFILASLLLTEENQPLSVWIYTLMGGIGRGIDWNYFAAAALLFALPVFIMFML…
54		TRUE	PFDSM3638_09060	preprotein translocase subunit SecY	52.2656	9.37917	1	300.7 (M.score:300.7)	7	16.6667	0.646304	54	MGARDIIYALERWFPEVERPKRRVPLRERFMWTGVALILYYVLAEIPVYGIPERIQDYFQFLRVVLAGRNGSILTLGIGPIVTAGIILQLLVGSEIIKLDLANPEDRRFYQALQRVFSVFMCFFEAAVWILGGAFGRVGVDVTYAIAVLMILQLAMGGIVLIILDELVSKWGIGSGISLFIAAGVSQTILTRSLNPLTDPNIIDPLTGQPAIVGAIPYFIQHILKGDLWGAIYRGGSAPDMLSVVATIVVFFIVVYFESMRVEIPLGYRGVTVRGSYPIRFLYVSNIPIILTFALYANIQLWARVLDRLGHPWLGRFDPTTGSPISGFVLYVIPPRNIFSVIDNPVRAIVYLILTVIFSLLFGYLWVELTGLDARSIARQLQRAGLQIPGFRRDPRTLE…
55		TRUE	PFDSM3638_08320	50S ribosomal protein L18e	13.7235	10.3493	1	299.4 (M.score:299.4)	4	30.8333	1.03842	55	MKRTGPTDPNLRRLIRYLRKKSNEYGVKIWKDVAWRLERPRRQRAEVNVSKINRYANDGEMIVVPGSVLGAGKLEKKVIVAAWKFSETARRKIIEAGGEAITIEELIERNPTGSGVRIME
56		TRUE	PFDSM3638_06875	translation elongation factor EF-1 subunitalpha	47.6053	8.68736	1	292.5 (M.score:292.5)	7	23.8318	0.766443	56	MPKDKPHVNIVFIGHVDHGKSTTIGRLLYDTGNIPEQIIKKFEEMGEKGKSFKFAWVMDRLKEERERGITIDVAHTKFETPHRYITIIDAPGHRDFVKNMITGASQADAAVLVVAATDGVMPQTKEHAFLARTLGIKHIIVAINKMDMVNYNQKRFEEVKAQVEKLLKMLGYKDFPVIPISAWEGENVVKKSDKMPWYNGPTLIEALDQIPEPEKPVDKPLRIPIQDVYSIKGVGTVPVGRVETGKLRVGEVVIFEPASTIFHKPIQGEVKSIEMHHEPLEEALPGDNIGFNVRGVSKNDIKRGDVAGHTTNPPTVVRTKDTFKAQIIVLNHPTAITVGYSPVLHAHTAQVPVRFEQLLAKLDPKTGNIVEENPQFIKTGDAAIVILRPMKPVVLEPVK…
57		TRUE	PFDSM3638_09450	GlcNAc transferase	39.8084	5.44776	1	290.4 (M.score:290.4)	5	15.6805	1.28735	57	MDKLKLYVAGFLALIIGIAGFIVWKWGFWMLIRIILSLGFLGLTLMLAFFLALTIYAESWKYALLLLPFTIISGYATYLSITWQKLKVIGGIILFFIAVLAFGIWYISEPDLSITDRFRSAEKLERMGKYKQAARKYEKAGNYLKAAEMYLKLGWLESAAWAYEKAGEYAKAAELYEQLYEKEKDTYYLKEAHEYWKKAGNMERAAKALERYAQEEPWFWEDVAKLYEELGNQEKAREAWMKALEYYKGEAQEEGVFWEDVGNIARKLGMEELAREAYQKFLEYCLKEAEEDPMWWKHVAEAYEYLGEKEKAEEARKKYEEYRQKIMKSNEETSNFPS
58		TRUE	PFDSM3638_07060	ABC transporter permease	43.0606	9.26115	1	277.7 (M.score:277.7)	4	14.3603	1.25082	58	MQEEYKKSILDKLADKFVYGLGKFISLFKKGWMEKNRSKLEEWRLMLYALNRSPPALIGLFLVMIFIFLGIFGPYLAPWKYNFMPTLYTSNYDQVYLVPPGSKAVLEYYNNAVITYPLGSDHYGRDLLSLILQGARTSFVISIIVIILGVPLGIILGLIAGYYGGKIDELIMRITDMFLSFPALILAIALSAVLPERLQEFISAHPILEKIVLAIFALDQREAGNLGRLLAVIVAMIIVWWPGYARITRGSTLAEREKLYIEAARAIGLPTRTILFKHILPNIIGPILVYITLDFGSVVLMEAGLSFLGLGATPPIADWGRIVYDGAQYFPRCWWLVFYPGLVVLLTALGWNLLGDGLRDILDPKTRRSIEFKVKKKEGEKSA
59		TRUE	PFDSM3638_06240	hypothetical protein	81.5928	4.93656	1	276.7 (M.score:276.7)	6	11.612	1.61668	59	MKRFFAFAMVLLFLLSALPVFGAQEYVKKVSVFSGHLKEDQKLQINEYLIRIEFGIDGSPYVIIEANNSIKEILKADFGAEVETGNLIVSCGSYDAEKGLFIVVLWKAIGEEYKVEKGSFVKNFEVLEVNSTEITIERGTSVFYIKANESVKVDKYILEFTGKSLVIYELPQVTVKGEKTFEISVSFPYKEVVAKPGDVLSFPIVIENRGDNSTVISLEFLRIPKDWSAEFLYQGIAVRSIEIPKKSAVTLTLNVQIPEEYSGREIIEFKVNSEVHRVVIDVKGETRKGKVEVITSIISQDAEAGEEIKFPLVIQSTIEANVSVEIGVPEGWDAHSLYMGSRVSMIHLSEEDSKTLEISLDVPRGADLGRYEIPVTLSISGNEYSETKVVTFFVNIYKT…
60		TRUE	PFDSM3638_04470	sulfhydrogenase 1 subunit alpha	48.2852	5.67303	1	273.8 (M.score:273.8)	8	24.0654	0.968112	60	MKNLYLPITIDHIARVEGKGGVEIIIGDDGVKEVKLNIIEGPRFFEAITIGKKLEEALAIYPRICSFCSAAHKLTALEAAEKAVGFVPREEIQALREVLYIGDMIESHALHLYLLVLPDYRGYSSPLKMVNEYKREIEIALKLKNLGTWMMDILGSRAIHQENAVLGGFGKLPEKSVLEKMKAELREALPLAEYTFELFAKLEQYSEVEGPITHLAVKPRGDAYGIYGDYIKASDGEEFPSEKYRDYIKEFVVEHSFAKHSHYKGRPFMVGAISRVINNADLLYGKAKELYEANKDLLKGTNPFANNLAQALEIVYFIERAIDLLDEALAKWPIKPRDEVEIKDGFGVSTTEAPRGILVYALKVENGRVSYADIITPTAFNLAMMEEHVRMMAEKHYND…
61		TRUE	PFDSM3638_06300	translation initiation factor IF-5A	15.4351	5.16695	1	270.4 (M.score:270.4)	5	36.9565	0.614794	61	MGDKTKVQVSKLKPGRYIIIDDEPCRIVNITVSSPGKHGSAKARIEAVGIFDGKVRSIVKPTSAEVDVPIIDKRTAQVIAVTPDTVQIMDMETYEMFEVPLDTGVEEEIKDKIKEGINVEYWETLGRIKIMRIKGEEE
62		TRUE	PFDSM3638_04975	phenylalanine--tRNA ligase subunit alpha	57.7145	9.20347	1	266.7 (M.score:266.7)	6	13.6273	0.693855	62	MLGYNEKLVLLKLNEVKKARIEELVKLTGLEQVAIMRALLTLEKEGLAKISERKERIIRLTDLGRKYIQMGLPEIRALNVLKSKKKVKLDELRGVLTEDELKPIVGILRKEGWVKVEKTPEGLVLEITERGENPEERPIDKALKILSEKEYATSEEISKIVPINELKRRKVAQEEEVVERIAEITEKGVELVKKGIELKREVTSLTPELIASGKWREVEFKPFNIKAPVKKIYPGKKQPYRVFLDKIRRKLIEMGFIEITVDSLIETQFWNFDALFQPQNHPAREWTDTYQLKYPEKGYLPNRELVERVKEAHERGLAGSRGWGYVWSPERAMFLMPRAHATALSARQLAKGIEIPGKYFTIQRVFRPDVLDRTHLIEFNQIDGFVAAEDLTFRHLLGI…
63		TRUE	PFDSM3638_07015	peptidylprolyl isomerase	29.0426	5.02767	1	263.5 (M.score:263.5)	6	39.1473	0.9674	63	MKVEKGDVIRLHYTGKVKETGEIFDTTYEDVAKEARIYNPNGIYGPVPIAVGAGHVLPGLDKRLIGLEVKKKYVIEVPPEEGFGLRDPGKIKIIPLGKFRKSGIIPYPGLEIEVETENGRKMRGRVLTVSGGRVRVDFNHPLAGKTLVYEVEVVEKIEDPIEKIKALIELRLPMIDKDKVIIEISEKDVKLNFKDVDIDPKTLILGEILLESDLKFIGYEKVEFEPTIEELLKPKSAEEQESPNEEQQEESESKAEES
64		TRUE	PFDSM3638_05715	translation initiation factor IF-2 subunitalpha	31.8971	7.74154	1	263.2 (M.score:263.2)	6	21.8182	0.981478	64	MPRRAREYPEEGELVVATVKRVHNYGAFLDLDEYPGKEGFMHISEVASTWVKNIRDYLREGQKVVAKVIRVDPKKGHIDLSLRRVTQQQRKAKLQEFKRAQKAENLLKLAAEKLGKDFEEAWREVWVPLENEWGEVYAAFEDAARNGIEVLKGYVPDEWLPVLKEIIDSYVEVPTVTIDAEFEITVPKPNGIEIIKEALIKARDRANQEKDIEVKFTYLGAPRYRIDITAPDYYKAEEVLEDIAEEILRVIKEAGGEATLLRKEKRIRKVKKRKK
65		TRUE	PFDSM3638_06325	methionine synthase	39.2905	5.92222	1	256.9 (M.score:256.9)	5	26.3314	1.08566	65	MELPILPTSVIGSYPKPRWLLRMYKLRELGKIPEEDFKEAVRDASISVLREHERAGIDIPWDGEMGRSEMTEYFTSKIKGFKFYGPVRVWGNAYFNKAAAVDKLEYEEPLVLDEFLWVKENTTREIVKIPITGPYTIAEWSFNEYYPDKESFVMDLAEIINKELKVLEKHGAKFVQLDEPAMLNHPSEVPLAVDAINRAVKGIKMKVGLHVCYSNYNLLADYFDEIKVTQFALEFANRNFRDMDFLKKLSNKELGFGVVDVHNPRVESVEEIRQAIKKVFTYLEPEWVYINPDCGLKLLDRKIAYQKLVNMVQAVRGVRKELEKEGKTTIEFRTLKDI
66		TRUE	PFDSM3638_10380	30S ribosomal protein S15	18.5883	10.4093	1	250.9 (M.score:250.9)	5	29.1139	0.863056	66	MARMHARKRGKSGSKRPPRTAPPIWVEYTVEEIENLVVKLRKEGYSTAMIGTILRDQYGIPSVKLFKDPDNPNRNLTITRILEKHGLAPEIPEDLMFLIRRAVNLRKHLEQHPKDLHSMRGLQLIESKIRRLVKYYKRKGKLPKNWRYDPETAKLLVR
67		TRUE	PFDSM3638_02395	translation initiation factor IF-2 subunit beta	16.2236	8.29835	1	244.8 (M.score:244.8)	6	43.5714	0.671903	67	MEIDYYDYEKLLEKAYQELPENVKHHKSRFEVPGALVTIEGNKTIIENFKDIADALNRDPQHLLKFLLREIATAGTLEGRRVVLQGRFTPYLIANKLKKYIKEYVICPVCGSPDTKIIKRDRFHFLKCEACGAETPIQHL
68		TRUE	PFDSM3638_01495	ABC transporter ATP-binding protein	27.2376	6.68678	1	242.6 (M.score:242.6)	5	31.0204	1.04714	68	MKAIVVEDLEKDYGKVKALKGISFEVKEGEIFGLIGPNGAGKSTTLKILATLLVPTGGRAEIFGYDVVEEAEEVRKLISYLPEEAGAYKNLTGYEYLEFMAKLYAKTGKDYKKMLETGVELSGLGERLKDRISTYSKGMTRKLLLARALMVEPKLAILDEPASGLDIINAYSIRQTIKQFAREKGITFLLSSHNMLEVEFLCDRVALINKGRIVEIGTPKELKEKYNAENLEEVFMSIVGGKKVE
69		TRUE	PFDSM3638_09625	hypothetical protein	18.2176	5.26191	1	242.2 (M.score:242.2)	3	23.871	0.421195	69	MKGRLQAHNIRIRTFIHATEDPEKVLEALETLFPEDISPKDVEFEIIETEGYFGNPILVLDAELKHSRNIRKFLENLRNLLSEEDKKYLLEHIEEKVDETGTFYIRFDKQKAYLGEVKVSEGEDVIHLRIKVKAFPMRKESVVEAVKKWLEGEME
70		TRUE	PFDSM3638_05240	hypothetical protein	45.8191	5.57626	1	241.9 (M.score:241.9)	6	19.2118	0.996484	70	MSIVTSIQALDRILGGGIKENCNIALVGSIDNDYVLLMHQIVNSILSQGKKVLLVEFREDPNSLLEWLKDYGIDYAQYMERKQLRILDGFTNVYSQTQVSKPDILPNPLDLSITSAIIRDAVSKEKYDFVVLDDITTLYPLQPDPRGYIRVTIRLVNSLKSRGASVIGGINKDVLPIQDLTMILIPFEYVVEVMNGIIRVKRSYSPLTTPIEGINYVKSKKGIVDVESAFNNVYQMRDSITLKEDGSLMLGNLRVQIIDEFSEASLIKFVYMYLGPEKGKEFLYKWGKFESKELKLPKSSKEKARQILEDMFTTTKITGGGILNFVSFEDDIIVIEGKNLFPRLKNFPYPAHVNYAGSIAGIVEKLLGGEWKGDEISCESQGHEKCLFVIRKVSDSKSS…
71		TRUE	PFDSM3638_02310	glyceraldehyde-3-phosphate:ferredoxinoxidoreductase	73.901	6.33504	1	241.7 (M.score:241.7)	5	11.4855	2.20336	71	MKFSVLKLDVGKREVEAQEIEREDIFGVVDYGIMRHNELRTYEVDPYDPRNIVIFGIGPFAGSVLPGSHRLVFFFRSPLYGGLFPSTMGGAGYQFKNVGVDFVEIHGKAEKPTVIILKNDGEKLSVDFYEIELEKLLDVWKEYKGEEGVYALTQYLLDNLASVFEGMEFRIAVVGPAALNTNMGAIFSQALRNGKRAVGSEDWAARGGPGSVLLRAHNVVAIAFGGKKRKREFPGEDISDVKVAKRVVEGIHKKAQRDVINESTVKYRYNPKLNTGGTFGGNYPAEGDLVPVLNWQMPYIPKEERIKIHELIMKYYWEPFNKESIQPKNWTTCGEPCPVVCKKHRKGHHVEYEPYEANGPLSGSIYLYASDISVHAVDAMGFDAIEFGGTAAWVLELVH…
72		TRUE	PFDSM3638_07880	DNA-directed RNA polymerase subunit B	126.924	6.28367	1	240.5 (M.score:240.5)	5	4.83438	0.686457	72	MRGPTVVDVTPDDLWIVMESYWQEKGLVRQHLDSYNAFIERGLQEVVNEFGGIKPDIPDFEVKFGKIRVGEPEFQEPHGQRKPLYPMDARIRNLTYAAPLYLEMIPVIKGVEQDPVEVRIGELPIMLKSKVCRLYGLSDEELIKLGEDPKDPGGYFIINGSERVIVSIEDIAPNRTLVEKDERQEKYIAKVFSYRHGYRALVAVERRKDGILYVDIPNVPKPVKFVYVMRALGLERDKDIVEAVGNDPEVQQIMFDNLEDASDITTQQEALEFIGKLVAPGQAREYRLKRAEYVIDNNLLPHMGVSPEDRIKKAYYLGMMALKVIELSLGRRPEDDKDHYANKRLRLAGDLLKDLFRVAFSQLVKDIQYQMTKTYQRKGDKYTFGNIHRFIRNSIRPDV…
73		TRUE	PFDSM3638_09070	50S ribosomal protein L30	17.6987	10.2477	1	240.4 (M.score:240.4)	6	32.9032	0.744866	73	MAKLAVIRIRGRVNVKRPVRDTLAMLRLHRVNHCVIVDDTPSYLGMLQKAKDYITWGEINAETLAKLIRKRGRLIGNKPVTDEYVKEKLGMTIEEFAQKVVNGEMSLKDLPNLKPVFRLHPPRGGFRGSKKRSFKEGGALGYRGEKINELIERML
74		TRUE	PFDSM3638_10365	30S ribosomal protein S3ae	22.9275	9.96835	1	237.0 (M.score:237.0)	5	19.1919	0.833231	74	MAAKRATTTRDKWKLKQWYIIYAPDFFGGVEVGLTPADDPEKVLNRVVEVTLKDVTGDFTKSHVKLYFQVYDVKGQNAYTKFKGMKLARSYIRSLVRRKTTRIDGIFNITTKDGYKLRVMAMAIAMRRIQTSQERAIRKIMQEIIYKKAEELNFKDFVLESVNGKIAAEIAKEAKKIYPLRKAEIRKIKVLEEPQVIA
75		TRUE	PFDSM3638_01550	inosine-5-monophosphate dehydrogenase	44.2299	6.00521	1	236.7 (M.score:236.7)	6	17.8571	1.01172	75	MVGIQVQEVITDKYAKIDINAPLSEAIGIFEKEDPDLILVFDGNVYKGVLTQDLIIKSHLKWDPTKAKVRDVYKPAPVVKPTDDLSHAAKLMLETDLRSLPVGENKAEIIGVISDLALLERVVAEEFGKRKVEEFMTKDVITLTPDDTVAKALATMRDHGISRIPVVDEEGKLEGLVTLHDLIIRFIKPRFRAQAGELAGEKIPPFSMKLREAMIRGVITILPDATIREAVATMKDNNIDGLVVVDENNKVVGILTVKDLLLPISRMVEKEAKFYLQLGGDAAALSDFTRERIINDIKKFVDGYSDLLGNEGIIYLYIRRFNEKFRGVHLYQARMRVVTDRGVYVATGETWGAIQAVHDALRAIERQLLQKAELERDIRYAKRFIEKLELWR
76		TRUE	PFDSM3638_04945	DNA polymerase III sliding clamp	27.9875	4.54029	1	233.8 (M.score:233.8)	5	26.1044	0.70796	76	MPFEIVFEGAKEFAQLIDTASKLIDEAAFKVTEDGISMRAMDPSRVVLIDLNLPSSIFSKYEVVEPETIGVNMDHLKKILKRGKAKDTLILKKGEENFLEITIQGTATRTFRVPLIDVEEMEVDLPELPFTAKVVVLGEVLKDAVKDASLVSDSIKFIARENEFIMKAEGETQEVEIKLTLEDEGLLDIEVQEETKSAYGVSYLSDMVKGLGKADEVTIKFGNEMPMQMEYYIRDEGRLTFLLAPRVEE
77		TRUE	PFDSM3638_08285	30S ribosomal protein S2	22.9924	9.298	1	232.6 (M.score:232.6)	5	18.8119	1.36082	77	MADEYLVPLDQYLAAGVHIGTQQKTKDMKKFIYRVRQDGLYVLDVRKTDERLKVAGKFLAKFEPQSILAVSVRLYGQKPVKKFGEVTGARAIPGRFLPGTMTNPAVKNFFEPDVLIVTDPRADHQAMREAVEIGIPIVALVDTENLLSYVDLAIPTNNKGRKALALIYWILAREILYNRGEIQSREDFKIPVEEFEMKIVRR
78		TRUE	PFDSM3638_09080	50S ribosomal protein L18	23.1724	9.72781	1	228.8 (M.score:228.8)	4	33.9901	1.2818	78	MAHGPRYRVPFRRRREGKTNYRKRLKLLKSGKPRLVVRKSLNHHIAQIIVYDPKGDRTLVSAHTRELIRDFGWKGHCGNTPSAYLLGLLIGYKAKQAGIEEAILDIGLHPPVRGSSVFAVLKGAVDAGLNVPHSPEIFPDEYRIRGEHIAEYAKMLKEQDEEKFRRQFGGYLVKGLDPEKLPEHFEEVKARIIEKFEGEGARE
79		TRUE	PFDSM3638_03005	aspartate carbamoyltransferase	34.7025	6.12078	1	228.7 (M.score:228.7)	5	16.5584	9.80723	79	MDWKGRDVISIRDFSKEDIEIVLSTAERLEKELKEKGQLEYARGKILATLFFEPSTRTRLSFESAMHRLGGAVIGFAEASTSSVKKGESLADTIKTVEQYSDVIVIRHPKEGAARLAAEVAEIPVINAGDGSNQHPTQTLLDLYTIRKEFGKIDGLKIGLLGDLKYGRTVHSLAEALAYYDVELYLISPELLRMPRHIVEELREKGVTVYETSDLMSVIGELDVLYVTRIQKERFPDEQEYLKVRGSYQVNLQVLSKAKETLKVMHPLPRVDEIHPEVDKTKHAIYFKQVFNGIPVRMALLGLVLGVI
80		TRUE	PFDSM3638_10010	hypothetical protein	15.5083	5.51868	1	227.9 (M.score:227.9)	5	39.4161	1.05367	80	MAILGHNIIRVEFEKNPVPGGQVEVSLNPKIEELRLGEINLPNGKVKGIEVELTYNIIYSPEVGKGMIRMIVFYLPRNREDVDNILDNWEKEKKLPGELVAEVVNFANNLLIPFAMMITKEMGMPSPIPIPRVVVRQ
81		TRUE	PFDSM3638_05320	methyltransferase	45.23	5.9125	1	227.4 (M.score:227.4)	6	19.6931	1.34277	81	MVDLTLITEEAVKLAEEMIRKGYDIKKIKRALKLPEEEFNIALEVAKARIKAKDKFSRNDLWFDLEGLRYATHEMVADYRGKRLKEQGVKSVADVSCGVGIQLIFFAKHGIESIGVDIDPIKIEFAKRNADKYGVNIKFIVGDSLDPEIVEKINAEVIFSDPARPPEVPERNLEDLLPSPLKVYEAYKEKTESFIFDLPPQIRREKVPWKGEFEYIDLYGHVNRLTFYTEPLAKAERSAVLLPQGARLESNPDLENIVEEVDEPGRYIYEIPQGIDYADLINELFHTVRGELKLLLREKRRILATSDEEIKCKYFKRAYVVVKTMPFHPVRINDFLRKEGYGRATLRISVPEEEYWKIRRRIEANLSGEKRAFVFNVKGLAVIAEEVHQDQ
82		TRUE	PFDSM3638_08335	30S ribosomal protein S11	14.7199	10.4117	1	225.9 (M.score:225.9)	3	22.6277	0.274346	82	MSEEQVNIKKKEKWGIAHIYSSFNNTIIHITDITGAETISRWSGGMVVKADRDEPSPYAAMLAARRAAEEALEKGIVGVHIRVRAPGGSKSKTPGPGAQAAIRALARAGLKIGRVEDVTPIPHDGTRPKGGRRGRRV
83		TRUE	PFDSM3638_02430	30S ribosomal protein S6e	13.9677	9.88268	1	225.8 (M.score:225.8)	4	44	1.41723	83	MATFKLVISDPKSGIAKQVEITGAETEKLIGKRIGDQIPAKELNINLNELFGKEFPEDVKLEIRGGTDKDGFPMRPDIHGPRRVRVLLSKGPGFRPKEKGERRKKTVRGNTISPEIVQVNVKLVY
84		TRUE	PFDSM3638_05300	threonine synthase	43.0256	5.33903	1	225.4 (M.score:225.4)	3	10.9137	1.59276	84	MVLKCVVCGREYPEDEVRYRCECGGLLEVVIDLDKVDTSIFNGKEIKLWKYESWLPVKKRVSLEEGGTPLYRLLNLESDLGVKELYAKNEGANPTGSFKDRGMTVGVSKALELGMDKVICASTGNTSASLAAYAAKAGIKAYVLIPSGKIALGKLAQAIIYGARVVPIKGNFDDALRVVVETSKELGIYMLNSINPFRLEGQKTIAYEIYDQLGKVPDNVILPVGNAGNISAIWKGFKEMYEAGVIDELPRMIGIQAEGASPLAKAWKEKRKFQPEESPETIASAIRIGNPANWIKAWRAVEESGGLFESVSDEEILRAQKLLASREGLFVEPASAASLAGLIKLLESGEISRNESYVLITTGHGLKDPNIVIKNFQVPEPIDPTLEAFKEVIE
85		TRUE	PFDSM3638_05560	hypothetical protein	124.812	4.20448	1	224.2 (M.score:224.2)	4	5.21201	2.1392	85	MRRNAQVFAMVLLLVLSGIPKALALYTPTPFSIDGNLEEWIKADAIAYGRDSGLPGANLDKLYIAWDDNYLYIAIKTNNTQSWDLAYGIGIDVDPGSGNGYTGDSDAWGRKIAFGNNYAIDYEIYFWWSGGSGITADNFINWTGSGWDYKSISDVGGSFAYTGDTSQGLQTLEIAIPWDALGGITRKFAIIAWIAGGDGSSAVDSLPVDDTIVDSDNEWVDQDVFTNLSVIMLSPKNIDGSLDDWADYEKVGSSLPSGYPGADLESLYVSWDSNYLYIAIKTNNTASWDVAYGIGIDVDPGSGNGYTGDTDAWGRKIGFQGFAVDYEIYFWWSGGSGITADNFINWTGSGWDYKSISDVGGSFAYTGDTSQGLQTLEIAIPWDALGGITRKFAIIAWIA…
86		TRUE	PFDSM3638_08740	hypothetical protein	51.0377	5.69962	1	224.1 (M.score:224.1)	5	13.7168	1.18772	86	MKRKKTVIHQLISEKQRFEKAKEGGNMAAKDDFGTTKYIIHAEFEANGVVERPDVVGAIFGQTEGLLGDDLDLRELQKTGRIGRIKVEVHTKAGKTYGTILVPSSLDRVETAIIAAALETIDRVGPCEAKIRVIKIEDVRATKRKYIIERAKEILETLMEEEIPETQELVEEVRKAVREMELIEYGPEKLPAGPHVPFSDSIIVVEGRADVLNLLRHGIKNAIAVEGTSIPETIIKLSKERIVTAFTDGDRGGELILKELLQVADIDYVARAPEGKEVEELTKKEIIKALRSKVPAEQVINELFNKGKSFYEIVKEREKEEEDERARKQEYTEEKESLKPQPQVQPNEKIVKPLKVLKPDYKEFEEFIEKVKNDSIALLIDENKNIIKEVPIRDMLSAI…
87		TRUE	PFDSM3638_00545	transcriptional regulator	39.4021	7.11541	1	222.1 (M.score:222.1)	6	25.2199	1.00314	87	MLEEEILQKLQKFGLTKYESLAYLTLLKLGPSKATDVTKESGIPHTRIYDVLSSLARKGFVDIVHGTPRLYAPVNPEIVLEKIREDLISDIERLKKAFQELYREVHGEELPEIWTVHGFENTIDRAQHIIRSAKHDILINTPYEFLEYLRGVLEKRNDVLIIVISNFSEIPLWLRNKNNVILARSGQAPWLLGTWVIGDINYALFFGTLPEDKGKERFYSFWVKSTRLIQNYVHWFYTMYFDNSEIVKPLNYERMEKPLTLSHIRTVITVLKQAGLPRNIEVIGRSLADKKQVTIKGKVIDYEYTPLTANITVKTDNKKIKVGGLGSYLEDIEGESFILLD
88		TRUE	PFDSM3638_07065	ABC transporter ATP-binding protein	36.1372	6.8032	1	221.2 (M.score:221.2)	4	13.8037	0.612044	88	MPEPILQVRNLTVHFYTYAGIVKAIEKVSFDVYKGETFALVGETGCGKSVTSRALTQLIESPGRIVEGQVLYYRDDGSVVDLLKLSEEEIRKIRGNEIAYIFQDPHASLDPLYTVGHQIAEAMEVHGKISNIKEGIQKAIQILKSVLIPDPERRVKNYPHELSGGMKQRVVIGIGVSNNPRILIADEPTTALDVTVQAQILELLDKMKREYNATIILITHNLGVVAETADRVAVMYAGKIVEIGSVDQIFKNPLHPYTQGLLKAVPNPMTKIEKLEAIPGTVPNLINPPSGCRFHPRCPKAMEVCKQKVPELKEIEPGHFVACHLY
89		TRUE	PFDSM3638_09925	anaerobic ribonucleoside-triphosphate reductase	70.0734	5.8733	1	220.2 (M.score:220.2)	5	10.0826	1.14733	89	MEKVDIIHEYARWGSLDVLENANRYPGPSGFFAYVMEEALKSSLSLIPEVGLRAHFSGDIYIHKLPYSLYIPYCTGHSIARLLKRGLRTPTITSRPAKHFDTFVDHIANYLITLQHYFSGAQAFSSVEWYAGPFIRKENLDLRKVKQNIQRLVYNLNYPTRIGLQTPFTNFTVTLDAPKKMLEGDYAIYNGEEVAPLGEYEREAKMFILALTEVLREGDALGQPFTFPIPTLMVTADMIWNDPEVFEAIFTTAAKRGSFYWLNTNVVDPDASYAMCCRLNIDKREFTYTFSLDEDVEKLERQRFGGLWAMPDVTGSVNVTTVNLPRIALKSRDEDEFWEEYEKTLEIVRITTEWFRNRYVKLLSMYPHMYSMIRDYLEEFPSSHFNTIGILGLPEAAAL…
90		TRUE	PFDSM3638_06470	hypothetical protein	15.7273	5.96024	1	218.9 (M.score:218.9)	6	42.2222	1.0757	90	MFEEVEVEAYVYPTEDIEKVKKAMLNLVPGLKFEAFDKGEYMILVGRTRDKRALQRLYELFRGQQILDTARMMLEEGYFGEEIIIKVHKQVAYVGKVNFNEESPLGPITIIIRTKEPQKLMKWLAPRTKDGVPIE
91		TRUE	PFDSM3638_04840	AAA family ATPase	94.0593	5.55532	2	218.3 (M.score:218.3)	5	7.8853	1.79706	91	MIIGRGEERKEEIKLRVAEALKWDVGRGIVRFDKKYQRMLGVEPGDIVEIEGNRITAAIVANAHPDDRGLDIVRMDGYIRKNAGVSIGDYVTIRRAEVKEAKKVVLAPAQKGVYIQIPGDLVKNNLLGRPVVKGDIVVASGRSEFYTGTPFDEIFRGFFEMSMGFGELKFVVVSTVPRGIVQITYNTEVEVLPQAVEVREEKVPEVTYEDIGGLKEAIEKIREMVELPLKHPELFERLGIEPPKGVLLYGPPGTGKTLLAKAVANEANAYFIAINGPEIMSKYYGESEERLREIFKEAEENAPAIIFIDEIDAIAPKREEVVGEVEKRVVSQLLTLMDGLKSRGKVIVIAATNRPDAIDPALRRPGRFDREIEVGVPDKQGRKEILQIHTRGMPIEPDY…
92		TRUE	PFDSM3638_07185	NADH-plastoquinone oxidoreductase subunit	15.6752	8.74482	1	218.2 (M.score:218.2)	5	29.4964	1.08195	92	MIRLPLLPTVIKNLFKKPATNPFPKTEPVPVPEDFRGKLVYNVDKCVGCRMCVTVCPAGVFVYLPEIRKVTLWIGRCVMCKQCVDVCPTAALQMSDEFLLASYDKYDAKLIYLTPEEAEDIKKKLEEANKAKAEKQASK
93		TRUE	PFDSM3638_03375	sodium ion-translocating decarboxylase subunitbeta	42.2339	6.9239	1	214.9 (M.score:214.9)	4	10	1.30256	93	MGLEQAVVDFFNHMGLLNLTVGNVVMIIVGLTLVYLAIRYEMEPLLLLPIGISAVLVNLPLSHMANWPLAPQLPPEIQENIFATISYLSQQYGPPGLFDLIYYLLIKTEVVPLLIFFGLGAMTDFGPMIADPKTALLGAAAQIGVFVAMLVALALGFNLKEAASIGIIGGADGPTTIYLTTKLAPHILSATAVAAYSYMSLVPLIQPPVIKALTTPEERRIRMEQLRPVSKREKILFPIASMIVIGLLVPSAAPLIGMLMIGNLFRESGVVQRLSKAAQEELMNIVTIFLGLGIGSTMRAESFLTPKTLMILALGVVAFASATAGGVLFGKIMMKISGGKINPMIGAAGVSAVPMSARVVQRLASEEDPGNFILMHAMGPNVAGVIGTAVVAGVFLSALG
94		TRUE	PFDSM3638_00485	polyhydroxyalkanoate depolymerase	40.0286	8.34673	1	212.3 (M.score:212.3)	5	18.0791	1.10574	94	MEVNKASLTYDVPEDREYATKRILSLKRPSKIMVIGDVDTGKTTLIVYLANELISRGFKVAIVDADVGQKGILPPATISLALADMKFSSLSELKPLIHYFVGSITPSQFFGEMIVGTMRLSEIGKKFADYVLIDTTGMIYGSGVELKRLKIEAVKPDLILALEKKEELNPIVSGFEDKTIKLKVSENARSYSRSERRQIRQEKWRKYFENAKIVSFSLENVVVTGTSLFQGSDIREEEKSLLERLFKWVILHGRRIGDKYFVVKADVAEVPRVVDKNVVRYFDFEKLSNLLVGLLNEEGLCLGVGIIKGINFGEKRIDILTPVSEIENVREIRFGRIRVREDGEELGILDREAL
95		TRUE	PFDSM3638_03370	acetyl-CoA carboxylase biotin carboxyl carrierprotein subunit	15.305	4.58291	1	211.9 (M.score:211.9)	4	36.8056	0.548653	95	MKVKIVINGEEYEVEVEEIMPGKFKVTLEGETYEVEAKDLGISTPAPVPQVPTPTPAPAPAPMPTSTPASPQVGDNVVTAPMPGKILKILVSEGQRVTIGQGLLILEAMKMENEIPSPKDGVVKKIYVKEGDTVDTGQPLIELG
96		TRUE	PFDSM3638_09110	50S ribosomal protein L5	21.2173	9.59184	1	211.2 (M.score:211.2)	3	15.0538	1.19657	96	MAVEIPNKEQILADWEAHPMRRPRIEKVTINIGVGESGERLTKAEIMLQQLTGQKPIRRKAKKTNRDFGIRRGEPIAVKVTLRGPKAYELLKRLLAAVDNRLKASSFDEHGNVCFGIEEHINIPGVEYDPEIGIFGMDVCVTLERPGFRVARRKRKRAKIPTRHKLTKEEGMVYMMEEFGVEIVEG
97		TRUE	PFDSM3638_02235	glutamine synthetase	50.1514	5.20904	1	211.1 (M.score:211.1)	5	17.5399	1.2358	97	MNISVSMNKFDSKIKFVQLVFVDINGMPKGMEIPASRLEEAVTDGISFDGSSVPGFQGIEDSDLVFKADPDTYVEVPWDNVARVYGFIYKDNKPYGADPRGILKRALEELEKEGYKAYIGPEPEFYLFKKNGTWELEIPDVGGYFDILTLDKARDIRREIAEYMPSFGLIPEVLHHEVGKAQHEIDFRYDEALKTADNIVSFKYITKAVAEMHGLYATFMPKPLFGFPGNGMHLHISLWKDGENVFMGEEGLSEIALHFIGGILKHAKALTAVTNPTVNSYKRLVPSYEAPVYISWGYRNRSALIRVPAFWGKGARIEYRCPDPSANPYFAFAAVLKAGLDGIKHKIDPFAYVEENVYEMSEEKRKELGIETLPGSLGEALEELEKDKVVKEALGDAYK…
98		TRUE	PFDSM3638_04080	50S ribosomal protein L14e	8.9581	10.3466	1	209.6 (M.score:209.6)	4	34.9398	0.280698	98	MPAIDVGRIAVVIAGRRAGQKVVVVDIIDKNFVLVTGAGLNKVKRRRMNIKHIEPLPQKIDIPRGASDEEVRAALEKAGISLA
99		TRUE	PFDSM3638_00915	ABC transporter ATP-binding protein	38.2962	7.64701	1	205.6 (M.score:205.6)	5	19.403	0.854064	99	MAEPILKVENLKKYFPVRRGLLGALRGEPQRFVRAVDGVSFEVYKQQVFALVGESGCGKTTTGKLVMKLLEPTDGKIYLEGQDVTELRTKEEIKAYRRRVQMIFQDPFSSMNPRFRIYDILEEPLLIHGIGETRAEREELIYKALEMVKITPPEDYVNRFPHMLSGGQRQRVAIARALILNPTFIVADEPVSMLDVSIRAEILELMKELKEKMGVTYLYITHDLSTARYFADWIAVMYLGRIVEMGPAKEVIDNPLHPYTRALLAAVPEPIPERKDVIKEIPIKGEVPSAVNVPPGCRFHPRCVYFKEGLCDKKEPQLVEYSHNHWVECHLAGKI
100		TRUE	PFDSM3638_07935	regulator	18.9724	6.85639	1	202.0 (M.score:202.0)	5	33.7349	1.1158	100	MWGKIEHYFDEYPVRKLIAKTLLRYGLRVSEDMKIKAGEIEVPYTKIAKALNVDRRVVKETVAMILKTPELRDIYMNLEPTVHMKYVGKHVGYGVIEIEPEPRAIGILAKIAQKIAEREINIVQVVAEDPELYPEATLTIITEKPIPGDLINELSKLEGVKRISIY
101		TRUE	PFDSM3638_01425	hypothetical protein	17.5062	4.67722	1	200.4 (M.score:200.4)	4	28.2051	0.789195	101	MVEVEKIEKLIEEISEEIKKAKTPEEVEVLERKVKSLKSLIEAIEGDKALDEVAMLMDKLGPMIEDVLGPIKELISELYNPERMAALGKSVAQFYKDLVEAGMDKEAALELTKEYMASINLFKSLMESLTKVVSMKGNIPFGGPKIEIEKEEEGRE
102		TRUE	PFDSM3638_09095	50S ribosomal protein L6	20.8472	8.66717	1	196.7 (M.score:196.7)	3	22.2826	0.940971	102	MPVDAWIREEVEIPEGVEVTVEGYKVKVKGPKGELEREFFWPGIQIFTEDGNVVIYKDFPRRKDVAIARTFAAHIRNMIKGVTEGFTYKLKVVYSHFPISVKVQGDEVIIENFLGEKAPRKAKILPGVTVKVRGQEIIVEGIDKEAVGQTAANIEQATRITKWDRRIFQDGIYIVEKAGKPITF
103		TRUE	PFDSM3638_07160	hydrogenase	13.0349	6.71807	1	194.2 (M.score:194.2)	3	31.3043	0.337108	103	MFGYWDPLYFIIVFIIGLILAYLLNLWAKKSGMGTREVGEGTKIFISGEDPEKVIPGFEHLEGYYTGRNTMWGLVNGVKKFFATLKNDHTGLLPDYVSYLLMTTAFILVILLLRG
104		TRUE	PFDSM3638_08340	30S ribosomal protein S4	21.3246	9.98351	1	193.8 (M.score:193.8)	2	15	1.17371	104	MGDPKRQRKKYETPPHPWIKERLDRERVLMDKYELKNKKELWKHETQLKNFRRRARRLLAARGKQAEIEREQLLARLKRLGLLPEDAVLDDVLSLTIEDILERRLQTIVYKKGLARTMRQARQLIVHGHIEVNGQIIRSPSYLVLKEEEDTITYARTSPFANPQHPERMMIEKAKQGGEA
105		TRUE	PFDSM3638_07850	30S ribosomal protein S7	24.6371	9.96311	1	191.8 (M.score:191.8)	4	25.1163	0.859386	105	MAKPLNERFFIPHEIKVMGRWSTEDVEVRDPSLKPYINLEPRLLPHTHGRHAKKHFGKANVHIVERLINKIMRSGGSHYKVAGHFMRREHRSLNSKKVKAYEVVKEAFKIIEQRTGKNPIQVLVWAIENAAPREDTTSVMFGGIRYHVAVDISPMRRLDVALRNIALGASAKCYRNKMSFAEALAEEIILAANKDPKSYAYSKKLEIERIAESSR
106		TRUE	PFDSM3638_09100	30S ribosomal protein S8	14.6529	9.61555	1	190.5 (M.score:190.5)	3	30	0.388326	106	MTLLDPLANALSHITNSERVGKREVYIKPASKLIGEVLRVMQKYGYIGEFEFIDDGRAGVYRVQLLGRINKAGAIKPRFPVKVSEFEKWEKRFLPAFEFGILIVSTSQGVMSHKEAIEKGIGGRLIAYVY
107		TRUE	PFDSM3638_04880	pyruvate ferredoxin oxidoreductase	20.0089	5.42661	1	188.1 (M.score:188.1)	2	17.8378	0.333397	107	MIEVRFHGRGGQGAVTAANILAEAAFLEGKYVQAFPFFGVERRGAPVTAFTRIDNKPIRIKTQIYEPDVVVVLDPSLLDAVDVTAGLKDEGIVIVNTEKSKEEVLEKLKKKPKKLAIVDATTIALEILGLPITNTAILGAVAKATGLVKIESIEEAIKDTFSGELGEKNARAAREAYEKTEVFEL
108		TRUE	PFDSM3638_01995	MoxR family ATPase	34.7931	5.75591	2	185.0 (M.score:185.0)	5	17.7419	1.42589	108	MVSGEKFLLKLKKEIHKAVVGKDEVIELLAVALLAEGHVLIEGLPGVAKTTIAKSFAQALGLKFSRIQLTPDLLPADILGTVYYDQVDGNWKIKKGPIFANVVLADEINRAQPKTQSALLEAMQERQVTIEGKTFSLERPFLVIATRNPLEFEGVYNLPEAQIDRFLLEIKVGYPSIEEELEMLKRKDKGEFYEVKTIFSKSEILEAIETVKRVRTSEEVLKYLHSIIVETRKDERLLVGASPRAAEHLLYAAKAKAFLEGRDYVIPDDVKSMAIPVLAHRLIVKPEYEIEGIKGDTVIKEILDKVEVPI
109		TRUE	PFDSM3638_09125	50S ribosomal protein L14	15.2274	11.3435	1	184.1 (M.score:184.1)	4	43.9716	1.36174	109	MAKKGAGATRGVSAVRPTRALPVGAYLTVADNSGAKVIQIIGVVEYHGTRRRLASAGVGDMVVATVKKGRPDMRHQVVRAVIIRQRKEYRRLDGMRVKFEDNAAVIVTPEGVPRGTEIRGPVAREAAERWVRIGSIASIIV
110		TRUE	PFDSM3638_06255	Na+dependent transporter	57.3993	5.81156	1	183.3 (M.score:183.3)	5	12.1154	0.986106	110	MEQRDRWATKIGLILAMAGNAIGLGNFVRFPTQVAGNGGGAFMVPYFLALFFLGIPVMWVEWVQGRYGGKYGHGTLGPTFYLMARETLKPRGALFFGLIGGALAFATTTLLNSYYLHLIGWSAAYSWFSISGAYFNVENTAEFFASYLSNHGLVFLFWGITVVLLAIAVGQGVSKGIERWVKVMMPLLYIFAIILVIYVFALGSPLGDPNWSTIKGFEFIWSPNWGYLKDHLWEVMLAASGQIFFTLSLGMGIIQNYASYLGPKDDVALSGLATVSLNEFAEVVLGGSIAVPLAVAYAPKIVPEDVLAQGSNAALAWISENFGLGFSYTSLPNIFVQMGTAGRFFGALWFLLLWFAGFTSAIAMYNYLTALLEEDLGISRKTGTWIVFVIYFLLGIPVV…
111		TRUE	PFDSM3638_05530	homoserine dehydrogenase	34.9765	4.9576	1	181.5 (M.score:181.5)	5	23.125	1.1846	111	MKEVKISIFGFGTVGRALAEIVAENSEVYGIKLKVVSITDRSGTLWGDFDLLEAKEVKEATGKISNIGDYEVYYLKPEEIIEEIRPDIFVDVSSWDDAARVYEFALKEGVSVVTSNKPPIAESYDKLLKASQEGNAGLFFEATVMAGTPIIGLLRENLLGEKIEEIKAVVNASTTFILTRMEQGKTFEEAFNEAKSLGVLEEDPSKDIDGIDAFYKAKILHWVSYGAPPEFEERVGIREVKDARNVRLVAQVSEGRISVKPIKLPENSPLLVEGVQNAAIIKTDNLGEVVLKGPGGGGRVTASGVFTDIIKAALRFPKAR
112		TRUE	PFDSM3638_04890	acetyl-CoA acetyltransferase	40.9551	4.81896	1	181.4 (M.score:181.4)	3	12.1134	1.439	112	MRKAIIVGVGMTPVGEHWRSSLRDLAVEAILNAMDDAGIDKVDSLYVGNMASGSFVEQENLGALIADWAGLGNIPAVKIEAACASGGAAVQEGAKAVLSGLEDVVLVVGVEKMTDAWPSDATRYLGYAADAEWELFHGASFVALNALIMRLYMNTYGYKEEDLALFAVNAHANGAKNPYAMFKKPITVETVMKSPYIADPLKLFDASPVCDGAAAVIITTPEKAKELGIPKDKWIEIAGMGRAIDTINLANREDFLTLKAATIAAERAYKMAGVKPEDVDFFEVHDAFTVMAALSLEALGVAKKGEGAKLAIEGQIAIDGDYPIQTMGGLKARGHPVGATGVYQVVEAVLQLRGEAPDGIQVPDAEVGLTQNIGGTGSNITVTVLRRV
113		TRUE	PFDSM3638_09935	hypothetical protein	27.016	4.83947	1	179.7 (M.score:179.7)	3	15	0.48956	113	MRKISLLVLVVVSSIIVAGCIGGGTSTAEVPKEELYAKLENATTLGVLWNLELLNSTTREVLATSKGKAVIYPNLVLSYRESEGENWISKSVITWENNEGSLILVMTINNTTQKYEDSKEFNVTIARKMAFPGGEIELLLLDNMEFNSTKVETKCDGECVLRIVKEDSKVLYDIQGVWKIEYIEGNVTFDSNTKEISKVEIVMETSQGFIEKIKYEFIKNNLDEAKAEIERIREELKNTS
114		TRUE	PFDSM3638_10045	50S ribosomal protein P1	11.2387	4.29324	1	178.0 (M.score:178.0)	3	49.5327	1.64638	114	MEYVYAALLLHSVGKEINEENLKAVLQAAGVEPDEARIKALVAALEGVNIDEVIEKAAMPVAVAAAPAAAPAGGGEEKKEEEKKEEEEKEEEVSEEEALAGLSALFG
115		TRUE	PFDSM3638_05565	putative methyltransferase	40.3017	4.68021	1	177.6 (M.score:177.6)	4	16.0458	0.203481	115	MKEIVERVKTKTKIPVYERSVENVLSAVLASDDIWRIVDLSEEPLPLVVAILESLNELGYVTFEDGVKLTEKGEELVAEYGIGKRYDFTCPHCQGKTVDLQAFADLLEQFREIVKDRPEPLHEFDQAYVTPETTVARVILMHTRGDLENKDIFVLGDDDLTSIALMLSGLPKRIAVLDIDERLTKFIEKAANEIGYEDIEIFTFDLRKPLPDYALHKFDTFITDPPETLEAIRAFVGRGIATLKGPRCAGYFGITRRESSLDKWREIQKLLLNEFNVVITDIIRNFNEYVNWGYAEETRAWKLIPIKKLPEYNWYKSYMFRIETLEGSRGYEDEIPEEDIYNDEESSTT
116		TRUE	PFDSM3638_04275	type 2 isopentenyl-diphosphate Delta-isomerase	41.1947	6.64266	1	175.4 (M.score:175.4)	5	12.8342	1.75118	116	MDEGTRTVLRKFEHIEHCLKRNVEAHATNGFEDVHFVHMSLPEIDKDEIDLSVKFLGRKFDYPIMITGMTGGTRKGEVAWKINRTLAQAAEELNIPLGVGSQRAMIEKPETWESYYVRDVAPNVFLVGNLGAPQFGRNAKRKYGVKEVLYAIEKIDADAIAIHMNPLQESVQPEGDTTFSGVLEALAEITSSIDYPVIAKETGAGVSKEVAIKLESIGVSAIDISGVGGTSWSGVEYYRAKDELGKRLALRFWDWGIKTAISLAEVRFSTNLPIIASGGMRDGITMAKALAMGASLVGIALPVLKPAAKGDVEGVIKVIKGYVEEIKNAMFLVGARNVEELRKVPIVFTGFVREWLEQRIDLQEFVKKRGKVKI
117		TRUE	PFDSM3638_10015	cell division protein FtsZ	39.9213	4.83413	1	169.8 (M.score:169.8)	4	13.4409	1.05617	117	MLKLVENVVGRVSEEENKVPEVQVPQSSIDEELKKIVEQIKARIYVVGVGGAGCNTVNRMMEVGVTGAKIIAVNTDAQDLLKVKAHQKILIGKELTRGLGAGNDPKIGEEAAKESERELRDALEGADMVFITCGLGGGTGTGAAPVIAEIARKMGALTVSVVTLPFTMEGIRRAKNAEYGLKRLVKYSDTVIVIPNDKLLEVAPKLPIQMAFKVADEILVQAVKGITELITKPGLVNLDFNDVRAVMKDGGVAMIGIGESDSEKRALEAAEQALNSPLLDVDISGATGALIHISGADVKLEEAQQIIEYVTRNVDPKAQVIWGIQLEPELEKTIRVMVVITGVTSRYITPEEETPLETPEESPSIEISIPEL
118		TRUE	PFDSM3638_08160	intein-containing tRNA-splicing ligase RtcB	106.117	8.79769	1	168.9 (M.score:168.9)	4	5.20723	1.55461	118	MKVPGRVYADDVLIEKMRQDRTLEQAANVAMLPGIYKYSIVMPDGHQGYGFPIGGVAAFDIKEGVISPGGIGYDINCLAPGTKVLTEHGYWLKIEEMPEKFKLQRLRLYNIEEGHNDFSRVAFVAERNIEKDETAIRIVTETGTLIEGSEDHPVLTPQGYVYLKNIKEGDYVIVYPFEGVPYEEKKGIIIDESAFEGEDPQVIKFLKERNLLPLRWEDPKIGTLARILGFALGDGHLGEMGGRLVLAFYGREETLRELKKDLESLGIKANLYVREKNYRIKTESGEYSGKTVLAELRVSSRSFALLLEKLGMPRGEKTKKAYRIPVWIMEAPLWVKRNFLAGFFGADGSIVEFKGTTPLPIHLTQAKDVALEENLKEFLYDISRILEEFGVKTTIYKVN…
119		TRUE	PFDSM3638_09175	50S ribosomal protein L4	28.6909	10.632	1	168.0 (M.score:168.0)	5	19.2157	1.28467	119	MKVKVFDLNGQPVGEIELPKVFFTPFRPDLIRRAVIASWTHRIQPQGRDPMAGKRRVTENIGKGHSMARVERLKTPPRYAAFVPFARGGRRTHPPKVEKIIWEDINKKEKRLALMSAIAATANYDLVRARGHIIDNVPQLPLIVVDDLQKVQKTRETREIFKKLGIWDDIVRAKEKSGVRAGKGKMRGRRYKKAKGPLIVVGKNEGIVLGARNHPGVDVVVVDNLGVEHLAPGTHPGRLTVWTVSAIERLRELYG
120		TRUE	PFDSM3638_05655	type III-B CRISPR module-associated proteinCmr3	36.2926	8.69408	1	167.7 (M.score:167.7)	4	17.0807	1.43177	120	MIEVTFTPYDVLLFRESRPFDAGSESVARSIIPLPQTVAGAIRTLLFYKGLKNCVGVGEEEPEFTLVGIAIGTEKGRIYPLPFNIIKSEKFYKVVNPGRFLGKLILPPKGKYKSGYVTESILEKYLKGELKEVEENKVIRIEKEKRIGIKLSREKKVVEEGMLYTVEFLRIEKIYAWIEDPGCGIKDILSSYEFLTLGGESRVAFVEVDDKTPDIFNRELGSTKKALFYFSTPTIGKVGEIVQELEKRLNAKIDDYLLVSSRPTAISGWDMHEKKPKGTKFAIPPGSVLFVEFKEEVEVPPYIKLGKLKKLGYGLALGGIWE
121		TRUE	PFDSM3638_09130	30S ribosomal protein S17	13.26	9.71082	1	166.9 (M.score:166.9)	3	29.2035	0.43522	121	MMRDIGLRVQPPAEKCDDPKCPWHGNLKIHGRVFEGIVVSDKPRKTVTVERQYYFYLNKYERYELRRSKIHAHNPPCINAKVGDKVLIAETRPLSKTKHFVVVAVLERAEERR
122		TRUE	PFDSM3638_06310	cystathionine gamma-synthase	41.1776	6.15859	1	163.4 (M.score:163.4)	4	13.9344	0.797134	122	MEPLHYPIYLTAVFKQIGDAYLTERGTELKYSREENPTVRNLEDKLAKLENAENALAFNSGMGAISTLFLSLLKAGDEIVMSMEGYGTTIEVPKLLEKFGVRVRLAYPSAEKICETITSNTTLVFIETMTNPTLKVIDVREVAKKCREEEITLIVDNTFVTPILYRPLEDGVNFVVHSLTKYIAGHNDVTGGVILWNGKFLNDLWDWRRRLGTIIQPFDAWMVERGMRTLNVRFEKQSKNALAIAEFLQDHPKVRKVHYPGLPSDPYHGIARRLFRKDLYGGVVSFDLGSEKSALAFLRSLKKIFPSPSLGGVESLATYPVKSAVKNMEKETRDLLGITDGLIRLSVGIEEVDELIEDLDRALKGC
123		TRUE	PFDSM3638_07180	CO-induced hydrogenase subunit K	35.3647	9.47445	1	160.7 (M.score:160.7)	3	10.2804	1.47749	123	MKIVYGVIGLILIYIYVSVVSLLFSGIDRKLVARMQRRIGPPILQPFYDFLKLMSKETIIPKTANFMFKAAPILMLATVIALLAYTPLGFPPIFGTKGDIIVFIYLLTLADFFLVVGVMSSGSPYGRIGAARGIALLVSREPAMMLGVFAVMWAISKLGVEKPFSLSSLYEHTIWDFGPVAWVAGVVLIYVFMAWLASEIEVGFFNIPEAEQEIAEGTLVEYSGRYLGIIKLAESIKEFIAASLVVAVLFPWQLNIPGVQGYLINLLLHTLKVFIVLLVSKTIFRTITGRLKISQAVNLLWTRVFTASVIGALLLALGVML
124		TRUE	PFDSM3638_09145	50S ribosomal protein L29	8.52384	10.326	1	160.7 (M.score:160.7)	2	36.1111	0.443694	124	MKPSEIREMSIEEIDAKIRELRLQLAKERGLLTMGTSLENPMVIRNLRRDIARLLTIKKEKLREREKGKVKK
125		TRUE	PFDSM3638_08705	4-demethylwyosine synthase TYW1	39.2279	6.87295	1	158.1 (M.score:158.1)	4	10.355	0.528588	125	MDIKPGKITVQANPNMPEEIANLFRKQHYELVGRHSGVKLCHWLKKSLTEGRFCYKQKFYGIHSHRCLQMTPVLAWCTHNCIFCWRPMETFLGTEVPEPWDDPAFIVEESIKAQRKLLVGYKGNPKVDKKKFEEAWEPKHAAISLSGEPMLYPYMGDLVEEFHKRGFTTFIVTNGTVPESLREMIKDDKLPTQLYVSLTAPDIETYNKVNIPMIPDGWEKILEFLELMRDIPTRTVVRLTLVKGENMHNPEGYARLIMKARPMFVEAKAYMFVGFSRNRLTINNMPSHEDIREFAEALVKYLPGYHIEDEYEPSRVVLIMRDDVDPSGTGLEGRFIKH
126		TRUE	PFDSM3638_01185	transcriptional regulator	16.9754	9.02306	1	157.7 (M.score:157.7)	4	29.3333	1.51295	126	MAELLDRTDKMLLEELKKNARENIAALSKKLGIPRTTVHYRIKRLLEEGIIEKFTIKPNYKKLNLGTTAFVLIRYDPDSGLTQKEVAEQIAKIPGVYEVHIVAGEWDILLKVRAANAEEVGKIVIEKLREIKGVGQTVTMVSFVTIKEEI
127		TRUE	PFDSM3638_08140	hypothetical protein	9.80618	4.72956	1	155.1 (M.score:155.1)	3	37.037	1.01239	127	MNPLWIIVLVSLVLNIVFIMLYVSARRNPYYIVYDEETKSQLKRRVLHLKEDLESELEEFDVTEWERQLEKSLEEEIKGLQ
128		TRUE	PFDSM3638_03085	hydrogenase nickel insertion protein HypA	15.753	4.99766	1	152.9 (M.score:152.9)	3	30.2158	0.322792	128	MHEWALADAIVRTVLDYAQKEGASRVKAVKVVLGELQDVGEDIVKFAMEELFRGTIAEGAEIIFEEEEAVFKCRNCGHVWKLKEVKDKLDERIREDIHFIPEVVHAFLSCPKCGSHDFEVVKGRGVYISGIMIEKEGEE
129		TRUE	PFDSM3638_09210	histone	7.40111	9.04784	2	152.5 (M.score:152.5)	2	37.3134	0.71014	129	MGELPIAPVDRLIRKAGAERVSEQAAKVLAEYLEEYAIEVAKKAVEFARHAGRKTVKVEDIKLAIKS
130		TRUE	PFDSM3638_08975	RNA-guided pseudouridylation complexpseudouridine synthase subunit Cbf5	38.5366	7.87399	1	151.5 (M.score:151.5)	4	12.6471	1.27185	130	MARDEVRRILPADIKREVLIKDENAETNPDWGFPPEKRPIEMHIQFGVINLDKPPGPTSHEVVAWIKKILNLEKAGHGGTLDPKVSGVLPVALEKATRVVQALLPAGKEYVALMHLHGDVPEDKIIQVMKEFEGEIIQRPPLRSAVKRRLRTRKVYYIEVLEIEGRDVLFRVGVEAGTYIRSLIHHIGLALGVGAHMSELRRTRSGPFKEDETLITLHDLVDYYYFWKEDGIEEYFRKAIQPMEKAVEHLPKVWIKDSAVAAVTHGADLAVPGIAKLHAGIKRGDLVAIMTLKDELVALGKAMMTSQEMLEKTKGIAVDVEKVFMPRDWYPKLWEKRDRS
131		TRUE	PFDSM3638_09290	TATA box-binding protein	49.2393	6.00286	1	149.8 (M.score:149.8)	4	12.0181	1.05853	131	MPVIEEIPTVKFERVGMHSHIKGLGLDENGKAKFIGDGMVGQVKAREAAGIAVKLIKQGKLAGKGILLVGPTGSGKTAIAMGIARELGEDVPFVQISGSEIYSAEMKKTEFLKQALRRAIGVRISEERKVYEGKVEKIEIRRTRHPFNPYIEIPESVVLTLKTKDDSKTIRAGREIAYQILEMGIEEGDVIQIDAETGRVSRIGTTKEEEGLFFRKKVEMPTGPVLKIKEFTYTVTLHDLDVVNARAGGIFSLLFGGRMEINDEIRERVDQTVKQWVEEGKATLVPGVLFIDECHMLDIEAFSFLARAMESELAPILILATNRGMTKIRGTDIESPHGIPLDMLDRLLIINTEPYKKEEIREIVKIRAREEKIELSEEALEYLAELGEQTSLRYAVQLL…
132		TRUE	PFDSM3638_07170	hydrogenase	20.1713	5.04967	1	148.1 (M.score:148.1)	3	18.4971	1.50992	132	MSKAEMVANKIKERFPNAEVVVKTNKWGRERVWVRISREEYKELMKFIRELDPEAHYSIGIEQDWGDELGFLNHILLFYDEPPGVSLLIDVHAPKDNPVLPDTSDIFPISLQFEREGMEMVGLDFEGAPDKRRLFLPDDFPEGIYPLRTDEKGVPEEMVKNAGHPYLLRREKK
133		TRUE	PFDSM3638_10030	50S ribosomal protein L11	17.6235	5.37908	1	146.9 (M.score:146.9)	3	24.3902	1.74323	133	MPKQVVEVLVEGGKATPGPPLGPAIGPLGLNVKQVVDKINEATKDFAGMQVPVKIIVDPVTKQFEIEVGVPPTSQLIKKELGLEKGSGEPKHNIVGNLTMEQVIKIAKMKKDQMLALTLKAAAKEVIGTALSMGVTVEGKDPREVQKEIDEGVYDELFEKAEKE
134		TRUE	PFDSM3638_04850	pyruvate ferredoxin oxidoreductase	36.2379	9.13233	1	143.5 (M.score:143.5)	3	16.3142	1.1093	134	MAVRKPPITTREYWAPGHAACAGCGCATALRLATKALSEAMEEKYGDPNAFAIAHATGCMEVVSAVFPYTAWKAPWIHVAFENAAAVASGIEAAWKKLGRKGKILAIGGDGGTADIGLQALSGMLERWHNVLYLMYDNEAYMNTGIQRSSSTPYGAWTTTSPPGKYSVGEDKPKKWVALIAAAHQIPYVATASIGNPLDFVRKIKKAGKIDGPAFVQVLCTCPTGWRSPLEKGVEIARLAIETGIWPLFEIENGDIWNIKIQPPGGGAKVYKEGNRVVRIEFKKPIEEYLKLQGRFKHLFKRPEAIEELRNQVKAMWKVLGVEAILPRPEE
135		TRUE	PFDSM3638_05360	30S ribosomal protein S8e	14.2531	11.519	1	141.8 (M.score:141.8)	3	31.4961	0.534075	135	MAIWQGRSLKKPSGGRIVLARKKRKRELGREPSNTRVAEQDKRKIIRTYGGNRKVRLTAAAYANVFDKSGKGRKVRIIRVIENPANRQFARRNIITKGAIIETEIGKAKVTSRPGQDGVVNAILLEE
136		TRUE	PFDSM3638_10040	50S ribosomal protein L10	37.1058	4.90975	1	140.5 (M.score:140.5)	3	10.6195	0.320996	136	MAHVAEWKKKEVEELANLIKSYPVVALVDVSSMPAYPLSQMRRLIRENNGLLRVSRNTLIELAIKKVAQELGKPELEKLINYIEGGAGILVTTMNPFKLYKFLQQNRQPAPAKPGAKVPKDVVIPAGPTSLAPGPIVGQMQAMGIPARIERGKVTIQKDTVVLKAGEEITPELANILNALGIQPLEVGLDLLAVYEDGIIYTPDVLAIDESEYINMLQKAYMHAFNLAVNIAYPTPQTIEAIIQKAFLNAKAVAVEAGYITKETISDIIGRAIRAMLLLAQQLPEDVLDEKTKELLSAQAQVSVAQVEEEKKEEKVEEEKEDEEASEEEALAGLSALFG
137		TRUE	PFDSM3638_00030	RNA-binding protein	53.6377	5.84916	1	140.4 (M.score:140.4)	3	7.46269	1.44981	137	MSTESEIAVRIRGIYSTALTKLLMDRGFKIVQPSDVIAERFGIEKSYEDFDVDIYDKNHGVTIVGTKVEAVKKVFEEEFIDVFFRKLPYKLHGIYKGLVVKRDDRFVYVDIGNVIGTVLIEELPDAAEGDEVVVQVKKHNVLPHLSTLITIPGDYAVLIPKPIGVQRHVKISRKIKDPEERERLRILGLSVDLGEWGVLWRTAAAYKDWNTLRDELVRLSKIADKLKEAEKFSAPAEIIEGREIYEIEFGGGVKKKLDEIRNEVVPTIEGHHQFKSYDPEFTLAVDVAEGILAKLPSQRQKISKGFLEAIITSKGPKVGWIFTLNHVKPDGQIIKIGPGEVIEVSTDPLKVTIKRYLRPGKFYDGLEVPIESGDYAITEIEAGKWWFVHRYYDKDGNLK…
138		TRUE	PFDSM3638_08315	50S ribosomal protein L13	16.3022	10.5336	1	140.1 (M.score:140.1)	3	26.7606	1.07475	138	MRIINAEGLILGRLASKVAKMLLEGEEVVIVNAEKAVITGNRDVIFKKYKQRTELRTLTNPRRGPFYPKRSDEIVRRTIRGMLPWKTDRGRKAFKRLKVYVGIPKEFQGKELETIIEAHVSRLSRPKYVTVGEVAKFLGGKF
139		TRUE	PFDSM3638_05690	protease	31.7821	7.08176	1	137.8 (M.score:137.8)	4	18.6851	1.17769	139	MGIGLWVRTGLLMAFLTGLLVGIGYLIGGQGGMIIAFTIALFMNFFSYWFSDSIVLSWYNARIVSEEEAPELHRIVEKLAMQAGIPKPRVAIVPTLVPNAFATGRSPEHAVVAVTEGLLRILNRDELEGVIAHEISHIKNRDTLIQTIAAVLAGAIMVLVNFARWSLWFGAYDEDRDGGNIVALILAIILAPIAATLIQLAISRSREYLADETGAKISGKPHALASALMKIEEAVRYRPLKNGNPATAHMFIVNPFRGVDFVELFSTHPPTEKRIERLRKIAMEMGIIF
140		TRUE	PFDSM3638_01035	30S ribosomal protein S27e	6.87274	9.3827	1	136.5 (M.score:136.5)	2	50.7937	0.434384	140	MAKPIIPMPRSRFLRVKCIDCGNEQIVFSHPATKVRCLICGATLVEPTGGKGIVKAKILEVLE
141		TRUE	PFDSM3638_05990	rubrerythrin	21.315	5.22976	1	136.1 (M.score:136.1)	3	25	0.85029	141	MNIEEEIVKKLENLSIKEILGYAIASEEDAEKFYSELATKLGGLLKEFFTQLSTAERGHKEILLRIYKSKFGDENYPVPEGIPFAETTIKVETVRNLIEAMKIALTNEKTAERVYKYLAEKMPEHREIFKFLATQERSHYESLRAHKEFLEDTVESKPEYIEAPPTYISSQLEIPFGPEYRGAR
142		TRUE	PFDSM3638_08085	glutamate dehydrogenase	47.0842	5.45321	1	132.8 (M.score:132.8)	4	14.0476	1.03295	142	MVEQDPYEIVIKQLERAAQYMEISEEALEFLKRPQRIVEVTIPVEMDDGSVKVFTGFRVQHNWARGPTKGGIRWHPEETLSTVKALAAWMTWKTAVMDLPYGGGKGGIIVDPKKLSDREKERLARGYIRAIYDVISPYEDIPAPDVYTNPQIMAWMMDEYETISRRKTPAFGIITGKPLSIGGSLGRIEATARGASYTIREAAKVLGWDTLKGKTIAIQGYGNAGYYLAKIMSEDFGMKVVAVSDSKGGIYNPDGLNADEVLKWKNEHGSVKDFPGATNITNEELLELEVDVLAPAAIEEVITKKNADNIKAKIVAEVANGPVTPEADEILFEKGILQIPDFLCNAGGVTVSYFEWVQNITGYYWTIEEVRERLDKKMTKAFYDVYNIAKEKNIHMRDA…
143		TRUE	PFDSM3638_05660	type III-B CRISPR-associated protein Cas10/Cmr2	100.921	7.02569	1	132.8 (M.score:132.8)	4	4.3628	1.54016	143	MVNIKEKLFVYLHDPPDKALKIENHEERSKKILSSGNIQYSRTDKVKQADALSSKTQRFIIRTKENKEPVIDFLGRSSGKYFHVGYPVFIHPISTEIKRYETLEKYIDLGRSNRGERFVNEFLERVSKLEGDVLKEVFEDASNKFKGEESKQWAYIWQFYPVKLKEGVKEFAKSELKLKEEEAEKFAEEFVNLPADTRFPDHAIWTHLDLTSALSVKDPTLLRIKIVPVQPFIANSRKQLDLWASSHLLSMLMYKALEVIVDKFGPEHVIYPSLRDQPFFLKFYLGENIGDEILVANLPNKALAIVSGKEAEKIEEEIKKRIRDFLLQLYREAVDWAVENGVVKVDRSEKDSMLKEAYLKIVREYFTVSITWVSLSEKEDIYQVTENAGLSDEDVKKWL…
144		TRUE	PFDSM3638_05635	type III-B CRISPR module RAMP protein Cmr6	38.7177	8.92255	1	132.1 (M.score:132.1)	2	7.94118	1.1651	144	MKEVVKLVLLGERQNSLNLSLYFNKYPPTIIYPEVLEDRNKKLASPSGSQRKISLLVLNQGVLQFNKIKETIEKSLPIETKVKLPQKAYELYKKYYQDYTDMLNSLHAITGKFKTQSRLVVGLGDESVYETSIRLLRNYGVPYIPGSAIKGVTRHLTYYVLAEFINEGNDFYKRAKTVQDAFMKGDPKEILSNAKVPERCSRLCKEFLRIFGEKKVPEIIDELIRIFGTQKKEGEVVFFDAIPIAEEIADKPILELDIMNPHYGPYYQSGEKNVPPPGDWYDPIPIFFLTVPKDVPFLVAVGGRDRELTEKAFSLVKLALRDLGVGAKTSLGYGRLVEYV
145		TRUE	PFDSM3638_03365	methylmalonyl-CoA epimerase	13.5676	9.24651	1	124.7 (M.score:124.7)	2	11.8644	0.788298	145	MSQLLEGLYITILGIVVVFSVLAILAIVMDLIGRTERKLVEKEKKKEVEDKKVEPVKVEKKLDEKKIAIITAAILAYLRGKQPKEVPIKRKPSPNWWLSGLITQMEEVENFNYEIGKW
146		TRUE	PFDSM3638_06820	50S ribosomal protein L7ae	13.3862	5.35131	1	121.8 (M.score:121.8)	2	26.8293	0.455138	146	MAKPSYVKFEVPKELAEKALQAVEIARDTGKIRKGTNETTKAVERGQAKLVIIAEDVDPEEIVAHLPPLCEEKEIPYIYVPSKKELGAAAGIEVAAASVAIIEPGKARDLVEEIAMKVKELMK
147		TRUE	PFDSM3638_04460	cytochrome-c3 hydrogenase subunit gamma	33.032	8.95011	1	121.2 (M.score:121.2)	3	10.9589	1.05149	147	MMLPKEIMMPNDNPYALHRVKVLKVYSLTETEKLFLFRFEDPELAEKWTFKPGQFVQLTIPGVGEVPISICSSPMRKGFFELCIRKAGRVTTVVHRLKPGDTVLVRGPYGNGFPVDEWEGMDLLLIAAGLGTAPLRSVFLYAMDNRWKYGNITFINTARYGKDLLFYKELEAMKDLAEAENVKIIQSVTRDPNWPGLKGRPQQFIVEANTNPKNTAVAICGPPRMYKSVFEALINYGYRPENIFVTLERRMKCGIGKCGHCNVGTSTSWKYICKDGPVFTYFDIVSTPGLLD
148		TRUE	PFDSM3638_01225	hypothetical protein	32.3903	7.11733	1	118.0 (M.score:118.0)	3	14.5907	0.932202	148	MFKIDRLRFGTAGIPLSTPKPSTIAGIERVRELGLDAMELEFVRGVNIRPELAKKIKYVAKKNDVVLTAHAPYYINLNAKEKEKVESSKRRIIQSAERLYEAGGWSVVFHAGYYLKEHPEKVYQKIESTLKDIERELKDRGIEVWLRPELTGKPTQFGDLKELIKLSQNLELVLPAIDFAHAHARNKGKCNSEEEWREMLALIENELGREALDNMHIHISGIEYTEKGEKRHLNLEESDLKWEDLLKVLKEFKVKGVVISESPNIEGDALLMKKKWEELKI
149		TRUE	PFDSM3638_00700	TIGR00266 family protein	23.4064	5.68563	1	116.5 (M.score:116.5)	3	16.4384	1.82802	149	MKYKIEHRPSFSLLEVELDAGESIQAEAGAMVYMDPTVEIVTKAKGGLLGALKRSILGGESFFVNIFKGPGKVGLAPGYPGDIIGLEVNGKLYAQSGAFIAASEDIDIDVKLGGIKTVIGREGLFLLELRGRGIAFLSSYGGIQKISLRGESLIVDTSHLVAFTEGIDFTIKTIGGLKSTLFGGEGFVFEFRGTGDVYIQTRSLDGFLSWLLPHLPSSR
150		TRUE	PFDSM3638_07720	nodulation protein NfeD	48.3952	7.69817	1	116.3 (M.score:116.3)	2	6.06742	1.30117	150	MKKAIMILTIFTLLLFAQGVKGRDSNVVYVAQITGQITSYTFDQFDRYISIAERNNARAIIIELDTPGGRGDAMMEIIQRIQQAKVPVIIYVYPPGASAASAGTYIALGAHLIAMAPGTSIGACRPILGYSQNGSIVEAPPKIVNHYIAYIKSLAEESGRNATIAEKFITEDLSLTPEEALKYGVIEVIARDVDDLLEKANGMTTKIPVNGRYIKLNFTNVEVRYLEPSLKDKLITYITDPNISYILLTLGIWALILGFLTPGWHVPETIGAIMIILAILGFGYFGYNAAGLLLIIVGMLFFVAEALTPTFGLFTVAGLISFILGGILLFGGGNVEYLVSKDVFSQLRLIIIILGVIIALFFAFGMAAVIRAHRRKAATGKEEMIGSEGTVVEELNPEG…
151		TRUE	PFDSM3638_03210	hypothetical protein	13.387	6.35213	1	115.7 (M.score:115.7)	3	26.6667	0.607068	151	MGGWIRNIGRYLSYLVDDTFEEYAYDVVDGIAKARTQEELLEGVYKALRLAPKLKKKAESKGCPPPRIPSPEDIEALEEKVEQLSNPKDLRKLAVSLALWAFASWNNCPKKGKGTEGGVE
152		TRUE	PFDSM3638_02500	NTPase	20.8483	9.65539	1	114.9 (M.score:114.9)	3	15.2174	1.06829	152	MKKFRFFVSGMPGVGKTTLAKRIADEIKREGFKVGGIITQEIRSGARRSGFRVIALDTGEIGRLAYVGQGYPRLGRYVIDVESFEKVAIPAISRALREGDLIVIDEIGPMEFKSNEFLKALGLVLRSEKPLLATVHRRFVERYRPLGEYYWLTPENREAVFSEILVKIKELLRENENAGNKAQD
153		TRUE	PFDSM3638_06405	hypothetical protein	6.76168	9.04838	1	114.7 (M.score:114.7)	2	42.3729	0.373652	153	MVELLVKSKVKEFVSSIDKDMRVSPEFYEALEAEVKALIEKAVKRAQAEGRKTLYARHV
154		TRUE	PFDSM3638_04885	hydroxymethylglutaryl-CoA synthase	38.1767	7.75457	1	114.5 (M.score:114.5)	3	11.1429	1.10279	154	MRKVMKPMKDVGIVGYGAYVPMYRIRNEEIGRVWGVSSFPIEEKAVPGLDEDAITIGIEAARNALKRAKIDPQKIRAIWFGTESKPYAVKPSATIIAEAIGATPDLEAADFEFACKAGTEALQAAIGFVGSGMAEYAMAIGADTAQGRPGDHLEFTAGAGGAAFIVGEKSNESVAYFEGSYSYVTDTPDFWRRQHEHYPRHGNRFTGEPAYFHHIINAAKTLMEELGLKPSDFDYAVFHQPNVKFPLTVAKILGIPKEKVLPGLLTGRIGNTYSGATMVGVSAVLDIAKPGDRILWVSFGSGAGSNAFSIVVQDAIEEKRDLAPKVEDYVKRRKVIDYALYAKARRKYIL
155		TRUE	PFDSM3638_10190	replication factor A	41.0195	4.94212	1	114.4 (M.score:114.4)	3	10.3352	1.22957	155	MSAFTKEEIIKRILEEVEGITLEEIENQIRQIMRENNISEHAAALLLAERLGVEVTKREEQPLMKISDLYPGMDPHEVNIVGRILKKYPPREYTKKDGSIGRVASLVIYDDTGRARVVLWDSKVLEYYSKLEVGDVIKVLDAQVRESLSGLPELHINFRARIIKNPDDPRVQDIPPLEEVRVATYTRKKISEVEPGDRFVELRGTIAKVYRVLVYDACPECKKKVDYDPGMDVWICPEHGEVEPIKITILDFGLDDGSGYIRITLFGDDAEELLGVGPEEIAQKLKEMESMGMTLKEAARKLAEEEFYNIIGKEIIVRGNVIEDRFLGLILRASSWEEVDYKREIERIKRELEELGVM
156		TRUE	PFDSM3638_07220	NADH-quinone oxidoreductase subunit NuoD	44.6732	5.66416	1	112.8 (M.score:112.8)	3	10.2302	0.864532	156	MVSQEELIREARQNGMELYPIDKDTYELFFGPQHMATENFSIILKMDGNRVVKAIANPGFLHRGFEKLAEYRPWYTNIALLLRICVPEPDVPEAIYSMAVDEIIGWEVPERAQWIRTLVLEMARVTAYLFWIMGLSFKLGVYTAGQWAAAYRERFMALFEQLTGARVYHIYTIPGGVRRDIPGDKWLRQVRDTVEYLKDKLKDFDNVLFENYITYKRLEGIGVMDKKFALEEGVTGPNLRATGVAYDVRKSDPYLLYPELDFEIPVLKEGDALARVLVRRYELEQDLYIIEQLLDMGPPSGPYKVQDPKLKNLPRFKVPPGEAFAHVEATKGDFGAYVVSDGGHKPYRVHIRGPSIAHGVRVLEQLLVGARLADVPAILMSLDNCPPDIDR
157		TRUE	PFDSM3638_07030	proteasome endopeptidase complex, archaeal, betasubunit	22.3698	6.84261	1	112.1 (M.score:112.1)	2	6.79612	2.2988	157	MLHLKEKLKGTTTVGLVCKEGVVLAADTRASLGNIIYAKNVTKIHKIDEHLAIAGAGDVGDILNLVRLLKAEANLYKSTVGKEMSVKALATLLANILNGSKYFPYLGWFLVGGYDEKPRLFSVDMVGGITEDNYAAAGSGMEFAYSILDSEYREEMSVNDGIKLAVKAINVAIKRDVFTGDGLLVVTITKDGYKEYRGAELEKMLK
158		TRUE	PFDSM3638_07370	radical SAM protein	45.238	8.82098	1	112.0 (M.score:112.0)	2	6.37755	1.54899	158	MRFSPIIGPSSYVSSLCHSILRGELFSTCSVGCIYCYARWYRGAHGKEKPLWESLKLIKMLGGIIREGLAITPIRVSTLSDPFQGEGKITLKFLKLALKEKVPVIINTKLIPREKHIKTIERLAEEGLVVVQVSLPTLEETKVLEPFSPSPGQRLELIERLSRAGVPTIVRVQPFVPGWIRDIHTFIEEIASAGARMIILEFLRIEKELLPLFSKLFPGEDIYKREWESYLPGTSTEEAPLLHPPLDYRLSIAREFSIKAEKEGLAFSTCKEGLFEFHTPLNVDCCGMAFFDVEYISRRPTLWDLYLEIVENGKAKGEDLWERCRREELLCRENLTPYPRWFRRGFIAHEKRLESVLRKPHIVERITPSIKYENGYFIKRKERSNSGYNSFF
159		TRUE	PFDSM3638_05665	type III-B CRISPR module RAMP protein Cmr1	38.7137	10.1272	1	111.2 (M.score:111.2)	3	10.3858	1.2574	159	MFIEEFEIEFITPAFIRGADQRIPEVRSPSIKGAMRWWFRALAGSYFGDDAQKLKEIENQVFGSTKERSRVKISVTPLSSPKRLNLKEFKDKNVGYIWFSINLLGKRGTITHYYPPGSRFRVVLESPSERVIKLATLSLWALVSLGSVGFRSRRGTGSMKIVRASSEVLEDLGLTTEFNSIDEFKDSLKRVLDVTGEILGVKNSETNKSLPSYATLKFSDVEVFGPGKNTWEVLAQFNNSYKEYLRRRIKKYQRIIFGLPRFKLRGVRKDLRRASPLWFGVVEIGGKPYGRIIKFFQSTFHPEVRSKHIVDWNVLSNFDWFISSRLPVTKVWGGWSG
160		TRUE	PFDSM3638_07855	30S ribosomal protein S12	16.4283	10.5509	1	111.0 (M.score:111.0)	2	16.3265	0.805952	160	MPGKKAPNGEFAGRKLKLKRKKFRWSDIRYKRRVLRLKEKSDPLEGAPQARGIVLEKIAVEAKQPNSGMRKAVRVQLIKNGKVVTAFCPGDGAIKFIDEHDEVIIEGIGGPKGGSMGDIPGIRYKVVKVNRVSLKELVKGRKEKPRR
161		TRUE	PFDSM3638_00860	ATP synthase subunit B	51.8828	5.34074	1	109.6 (M.score:109.6)	3	8.00866	1.06908	161	MAKEYSTISRIYGPLMIVEGVKGVAYGEVVEIETEWGEKRKGQVLDARENLAIVQVFEGTRDLDIKTTRVRFTGETLKVPVSMDMLGRIFNGIGKPIDGGPEIIPEDRRDVHGAPLNPVARAYPRDFIQTGISAIDGMNTLVRGQKLPIFSGSGLPHNKLAAQIARQAKVLGEEESFAVVFAAMGITYEEANFFKKSFEETGAIERAVLFLNLADDPAIERIITPRMALTVAEYLAFDYDMHVLVILTDMTNYCEALREISAAREEVPGRRGYPGYMYTDLATIYERAGRVRGKKGSITQMPILTMPDDDITHPIPDLTGYITEGQIVLSRDLHRRGIYPPIDVLPSLSRLMKDGIGKGRTREDHPQLAQQLYAAYAEGRSLRDLVAVVGEEALSETDK…
162		TRUE	PFDSM3638_00180	DUF2067 domain-containing protein	25.6998	5.66576	1	106.8 (M.score:106.8)	3	16.895	0.791339	162	MRAKKVIVLHVRDDIEKEEFMKEVQRLNLSAFIYIHGKLDSLKVNVQGTKEEIREAIRAIRDAHKRVRGRLYPDRKGLYTYYPEDIFREANANISLPILIKTLELLGERVEVKEDYIKSSMPWREIVELVRRLNEVLSQIALQTTRQIREVVAPVSVAYKIDPEELLDLLVDLGIAEYKEDKFKYELVKNKEQALKELLEYLEGDKDEDRSDKEGRESA
163		TRUE	PFDSM3638_10215	dinitrogenase iron-molybdenum cofactor	18.9898	9.51472	1	104.4 (M.score:104.4)	3	18.9944	1.22313	163	MKIAIPTNGGGREDTVAPLFARAPAFYIAEVDEKGNIISEKVIQNPAATAGRGAGPIAVQMLINEGVDTIVAPQVVPNALGAIQAAGIRVYYVTPGTPVEEAIKVATTGQGGQLPSLPQIPTPVTPAPAMYGPVYPPFGWGRGWGKGRGWGRGWGSILGYCPWTGMPSRRALRWYYGWW
164		TRUE	PFDSM3638_00820	TrkA family potassium uptake protein	25.4387	5.40728	1	104.4 (M.score:104.4)	3	14.7826	0.793786	164	MYVIIMGAGRIGTLVAKMLENSGHDVAIIEMNKDRARAVSDIVSGLVIEGDATDQNILESANVRNADAFVALTGKDDANILACILAKHLNPRIMTILRITDPRKKKIFEEVKDLKKYFDVVVSPEDIAANYIFRVVITPGFDRVLLPREGAEIIQFHIDENSKVAGKAVKDLNLPRDSLIIAIYDEKGNLIIPSGETILPKRGTVVVFAKDSALKEIKKIMEEKVEESEE
165		TRUE	PFDSM3638_07110	aspartate aminotransferase family protein	50.7245	5.70112	1	103.6 (M.score:103.6)	2	5.28634	0.70507	165	MELRPNVKEIPGPKAREIIEKHHKYMATTTNDPNEYFLVIERAEGVYWIDVDGNVILDFSSGIGVLNVGLRNPRVVEAIKKQLDLVLHAAGTDYYNPYQVALAEKLVQITPGDFEKKVFLSNSGTEANEAALKIAKWSTNRKMFIAFIGAFHGRTHGTMSLTASKPVQRSRMFPTMPGVEHVPYPNPYRNPWHIDGYENPDELINRVLEYIEEYLFSHYVPAEEVAGIVFEPIQGEGGYVVPPRNFFKELKKLADKYGILLIDDEVQMGIGRTGKMWAIEHFGIAPDIITTAKALGGGIPIGATIFRKDLDFGVSGVHSNTFGGNAVAAAAALAVMEELENGLLENVQKLEPLFRERLEEMKEKYEIIGDVRGIGLAWGVEFVKDRKTKEYATKERNEV…
166		TRUE	PFDSM3638_07230	NADH-quinone oxidoreductase subunit B	22.6864	7.57182	1	101.8 (M.score:101.8)	3	16.6667	0.183626	166	MVDWRLFEPLFNWARKKSLWIVAFCTGCGGIEMPPLMTARYDLERFGIMPDPSPRQYDLFLITGYVTPKTLKRIIITYEMAPDPKYVLAHGSCPINGGIYWDAYNAIKQLDKYIPVDVYIAGCMPRPEAVMDGIKKLMEMIENGEADGWKRYKENYEWYRKNQDELLGEGWREKEARKWIPWLMDKRKEVKE
167		TRUE	PFDSM3638_09365	DUF655 domain-containing protein	24.2949	9.07049	1	100.8 (M.score:100.8)	3	14.6341	0.930404	167	MDYHRRHPYHHSIKKKMNVEYEEYAYVLDYLPNGYPDLRTGHYLGKPVAQVIGEKAFTLLEVTPKVDLMLYERVYVGKGERDKVLKINKKLTYDELTDTAKAELPYVLEEIVKNNEDRFVKFFNIAPPITNRLHSLELLPGIGKKHMWEIIEEREKKPFESFEDLKKRVKGLPDPVKMIAKRILEELQGKDKYRLFVGSNRIFRE
168		TRUE	PFDSM3638_00900	ABC transporter permease	38.9845	9.85566	1	99.5 (M.score:99.5)	3	9.74212	1.70789	168	MGLGKYLLIRAINALIVLSIVVLVVSALFVKVAEKELESRIQEIVNAEYQSLVQQNRAPSDPEAWKMERIKYYRHLYKLDQPYHIRVLYYAKRTITLDFGNTRIPIFGTERNVKAIISLALPRTILLFTTAQIIVIILGLLLGVKAAQKVGSLFDRALSVLALVTTSIPMWWFGMIMLLIFAFKLGWFPSNSMPNPNLTGLDHVLDVARRLVLPITTIVFVLFGGWAWVTRNIMISTLQEDFIMVARAKGVPERKVIYGHGLRAAAPPIVTMTIFSLLGSLGGAIITESVFNWPGMGRVYWIAIETQEINLVMGLTFISVVLYLAGVIIADISYGFLDPRVRVGASAKM
169		TRUE	PFDSM3638_06910	hypothetical protein	16.2217	8.17306	1	99.5 (M.score:99.5)	2	22.2222	1.34871	169	MVITLVGEKLAKPGVEFIYYGPAEPCKSCRLARVCTGNLEPGRRYKIIKVRNMEYPCLLHEGKVRVVEVVEPAIDVIIEPRYAVAGSKITLKFVECDDPEKVDLVRPEGLFEGDVVKILEIIGDIECNGRKYKIAKVIRENTQK
170		TRUE	PFDSM3638_06260	alkaline-shock protein	27.8791	9.58201	1	96.9 (M.score:96.9)	2	12.7049	1.97158	170	MKSPEILKEVSENLIKTIEKLEKVKVFEEKRKRKLISLLEEASGNFLKLSGEVENDNVQMAEFLRKRSVEIKNNTNDKAIERMGEKEYIKAVEKMNLYSKTAFYDFKPTMLRKLKKAYRSFIFGMALYFVLAGLSTRPELAVTALILAIPAILSMLSLQRRGYTGLMLAYAVAPIPMIQSPMLIRMFYGVLRDPEAIRTAAEYLGKSETFIVVYAYVVIILSIVDFALLAYGLYGLTKHRHAFL
171		TRUE	PFDSM3638_07055	ABC transporter permease	37.1287	9.99056	1	96.8 (M.score:96.8)	2	6.92771	0.410452	171	MANLKKFLIRRLLTFIPTIIGVTIIVFLIAYKIPADPAKAWAGGEKATQAAIERIIREYHLDKPWYDQYIFLMKGLLTNTIIDPRTSNPVMYDVGKRFPVTFQLAIIAFVFILLVGIPLGIISALKRNTWIDTVVRIFALLGVSTPAFWLGYLMLYVFFVKYRITTIAGVPPFPPKITGVPMIDALLRGDFALFKQHLARFWLPGFTLGFLGMGVTARFVRNSFLEALSSDFVQFLKAKGVPKLRLYRHALKNALVPIVTVLGLQFGGLLGGTPITETVFGLPGMGSYAVQSIQNLDFPVVVAITFIYAIIYVVTNLVVDILYAIIDPRVRY
172		TRUE	PFDSM3638_02200	MFS transporter	49.4009	9.47594	1	96.3 (M.score:96.3)	2	6.09481	1.13425	172	MGNIRRRVSIVLLILMAAFLMADQNLLPPNYQQIMKEFGIGETQMGLVSSIFVATSALITIIWGMLADIKQRKKLLVIGVLLGEIPCFLTAYVQTYWQLLAMRFLTGIGIGSIIPIGYSLIADMFEEEKRGRGYSYIETAFGFGTLFGMIIAGMIASWRTPFIIAAVPNFILAPLFYIIAEEPKRGAGEKEIRALIEKGYEYTYRLNLEAIRKSFQTKTNILIFLQGIIGTVPWGILLYWLVSFLQVTRGMDKSTATFVLLIIGIASVFGSLLGGFVGDYFEAKRRGGRATITGIAIFLGMLASIGLILYPLPSKLSTVHWIGLAIYSILFIQFVSYAGPNVRAIVSQVNLPEDRGTVFGLFNILDNVGKAIGPLFGGFLIETLKSMGYMEPLAYQYTL…
173		TRUE	PFDSM3638_07130	cation:proton antiporter	13.4953	9.62868	1	95.6 (M.score:95.6)	3	13.7097	0.928371	173	MIAYYLIIAFLGISVTFNMLGSIALHRFPDVYTRLHGATKCTTFGTIFAALAVITHAIVKLQATGNPKYLQMAIHSFVAMLALLLTNPVGAHAIAKAAHKTGYLPKRAVVDAYLEKERGEKNES
174		TRUE	PFDSM3638_03915	IS982 family transposase	33.8114	9.76391	4	92.1 (M.score:92.1)	2	11.0727	0.965936	174	MVVLSFQRKILIIKSEIYPIVSKHYPKNTRREVISLYDLITFAILAHLHFNGVYKHAYRVLIEEMKLFPKIRYNKLTERLNRHEKLLLLAQEELFKKHAREYVRILDSKPIQTKELARKNRKDKEGSSEVISEKPAVGFVPSKKFYYGYKLTCYSDGNLLALLSVDPANKHDVSVVREKFWVIVEEFSGCFLFLDKGYVSRGLEEEFLRFGVVYTPVKRGNQISNLEEKKFYKYLSDFRRRIETLFSKFSEFLLRPSRSVSLRGLAVRILGAILAVNLDRLYNFTGGGN
175		TRUE	PFDSM3638_08045	glycosyltransferase family 2 protein	31.7664	9.11749	1	90.8 (M.score:90.8)	3	16.7247	2.59756	175	MILREIKLLSDNPEIINLLRRLGIKIGKDEGLPKIGEYFIEFQGIRYEGNSLIELENILSNLLGTYVVVPAYNEEKTIGKVLDELLAIFPRERIIVVNDGSEDRTEEIAKSKGVRVLTHLINRGLGGALGTGIEYAIKKGAKIIVTFDADGQHLVEDALKVMKPVVEGKAELAIGSRLKGDTSQMPFVKKIGNIGLDVITAIFSGKYVSDTQSGLRAFSRSCAERIKITCDRYAVSSEIIVKAAKNKCRIVEVPIKAIYTEYSKKKGTNVLEGIKIAFNLFVEIFRK
176		TRUE	PFDSM3638_07575	DNA cytosine methyltransferase	78.45	5.67773	1	90.4 (M.score:90.4)	2	3.29513	1.44425	176	MKKASILLIIMLIASGLTIFNPKALGLEKYSTLTVGLKLGGYIEFGGKYAVKFADVDPTNWNRAAIEIYENGNRVARKILEEGQTMYYPDENNPLFGVEVTGIWESQKTAYIEIKTPVKLFKENITLKEGESYTMPSGFPQYKITVRDVPSDTKAELTIRYPDGTTVTRTLEKDYPVGVPYKISSELTQSSVLVIEYVKASKDKSVTFNLYIAKMIFAPAKVVQPEEQKEEKTTTEEPIQVVYDDVIYAGEKVTITYNKTTYQIQLVSVGYYSKFDLIIDDKSVETATVKEGGSYIFTKAPLRVEVIPNTVDLKYNRLQAKIYAPIGASGSVILREANITVRLDISQNRVLLGEEIIVFIKVKNEGKGNAFNVKVLAPIPNNFELISGIGTWELSRLEP…
177		TRUE	PFDSM3638_01895	RNA ligase	43.6851	5.77493	1	90.2 (M.score:90.2)	2	6.86016	2.14897	177	MVSSKFKELLYTLGIPEDKVEILEARGGIMEDEFEGIRYLRFKNSVGKLRRGTVLFEDGTTVFGFPHIKRIVNLSAGVRKIFKSSEFYVEEKVDGYNVRVVKFKDRILGITRGGFICPYTTERIAEFVPEEFFKDHKDLVLVGEMAGPESPYLVEGPPYVKEDIQFFLFDIQDIKTGSSLPVEERLKLAEEYGINHVEVFGRYSYKDIDDLYELIERLSREGREGIVMKSPDMKKIVKYVTPYANINDIKIGARVFYELPGGYFTSRISRLAFYIAEKKIRGEELHNLALQLGKALLQPLVEAIHDVTQGDVIAERFRVRVRKIETAYKMVTHFEKLGLEIEIEDIEEIEGGWRVTFKRVYPEATREIRDLIGGKAFVD
178		TRUE	PFDSM3638_09065	50S ribosomal protein L15	16.3899	10.59	1	89.8 (M.score:89.8)	2	21.7687	0.938616	178	MIRRRKKVRKLRGSHTHGWGCKKKHRGGGSKGGRGMAGTGKRNKSKWTWTIKYAPDHLGKRGFSRPPEVQREVRVVNLKFIDEHLDELMQMGIAYEEGGKIIVDVTQFADKVLGTGKLTRPLVIKARAFSPKAEEKIKAAGGEAVLV
179		TRUE	PFDSM3638_05970	rubrerythrin	38.7778	4.9387	1	88.2 (M.score:88.2)	2	6.08696	1.34348	179	MLSINPTLINRDKPYTKEELMEILRLAIIAELDAINLYEQMARYSEDENVRKILLDVAREEKAHVGEFMALLLNLDPEQVTELKGGFEEVKELTGIEAHINDNKKEESNVEYFEKLRSALLDGVNKGRSLLKHLPVTRIEGQSFRVDIIKFEDGVRVVKQEYKPIPLLKKKFYVGIRELNDGTYDVSIATKAGELLVKDEESLVIREILSTEGIKKMKLSSWDNPEEALNDLMNALQEASNASAGPFGLIINPKRYAKLLKIYEKSGKMLVEVLKEIFRGGIIVTLNIDENKVIIFANTPAVLDVVVGQDVTLQELGPEGDDVAFLVSEAIGIRIKNPEAIVVLE
180		TRUE	PFDSM3638_01140	hypothetical protein	31.6069	6.67364	1	87.9 (M.score:87.9)	2	7.85714	1.82777	180	MDPLSGFVGSLIWWILFFYLLMGPQLQYRQLQIARAKLLEKMARKRNSTVITMIHRQESIGFFGIPVYKFISIEDSEEVLRAIRMAPKDKPIDLIIHTPGGLVLAATQIAKALKDHPAETRVIVPHYAMSGGTLIALAADKIIMDPHAVLGPVDPQLGQYPAPSIIKAVEQKGAEKVDDQTLILADVAKKAIKQVQDFLYDLLKDKYGEEKARELAQILTEGRWTHDYPITVEHARELGLEVDTNVPEEVYALMELYKQPVRQRGTVEFMPYPVKQEGKK
181		TRUE	PFDSM3638_09715	KaiC domain-containing protein	27.6356	8.56025	1	87.7 (M.score:87.7)	2	11.7409	1.45058	181	MVRRVKTGIPGMDEILHGGIPERNVVLLSGGPGTGKSIFSQQFLWNGLQMGEPGIYVALEEHPVQVRQNMAQFGWDVRKYEEEGLFAMVDAFTAGVGKSKEYEKYIVHDLTDIREFIEVLRQAIRDINAKRVVVDSVTTLYINKPAMARSIILQLKRVLAGTGCTSIFVSQISVGERGFGGPGVEHGVDGIIRLDLDEIDGELKRSLIVWKMRGTSHSMKRHPFDITDKGIIVYPDKVLKRGRIYEL
182		TRUE	PFDSM3638_00830	V-type ATP synthase subunit I	75.3964	6.21851	1	87.2 (M.score:87.2)	2	3.77074	1.85931	182	MFKPEEMVKIELISLARYRDIIMTYLHERGVVQLEEVPIEDIQHDAPNEYYRKATSYSITMGRLVDTLKGFLPPRKTSIKEFIFPKEREKRVYTYRGIEDLVKDVEKFLSEVEPKIREVETQLTAINNRIANIREIINTLELLSSLNIEIEYLIPGSFLAIEVGKIERERVEKLIGELKNELGDKVFILRRDLGTISLLVVVTLKEFQGKLTSILAKYGFEKVEIPRERGHPRELIPKYNELLKEEMKKLEEIRKKGREFAEKYYEDLVFYKELMDNERDKANYLSYLARTELTVALVGWLPKKNVEEVVEGIKNLTGGKVYINIREPEPNEIEEVPVKLKNPEFISQFEMLTEMYGVPKYNELDPTPILAFTYSFFFGFMLTDFMYGLLLGIVSALLV…
183		TRUE	PFDSM3638_07490	30S ribosomal protein S17e	7.9194	10.4898	1	86.3 (M.score:86.3)	2	26.8657	1.22476	183	MGKIRQGFIKRVARELVNKYPNEFTTDFEHNKKKVQELTNVTSKKIRNRIAGYVTKLVRMKMEGKIL
184		TRUE	PFDSM3638_09930	ribonucleoside-triphosphate reductase activatingprotein	27.6424	5.21053	1	85.0 (M.score:85.0)	3	20.1681	2.17888	184	MLIGGWKAVSMVDIPGKVTFTLWLCGCNLRCPFCHNWKLAQGMECFKLEKEELIAEVEENSYLVDYFHVTGGEPLIQWREFQELLREVREYLPVSLNSNLTLVKPLEKIIDLVDHVATDLKAPPTELYGLPENVSLKLWQLFLKGLEIVSENSIPLELRIPVSKGFDIQEIMRWIEEGLEKIDTDFYVVLHPLVGPPITNPRNKEWCNNHCWADREIELIKEKLEERGVKKVIVRKYS
185		TRUE	PFDSM3638_10035	50S ribosomal protein L1	23.8372	9.78089	1	83.4 (M.score:83.4)	1	6.48148	0.833738	185	MPFDRQKIVKAVKEAKARAKPRNFTQSVEVAVNLKDIDLKRPENRFKLEVVLPHGRGKDVKIAVIADGAVAEAARKLGLDVISSAELEEIASSPRQARKLAKKYDFFIAEAPLMPKIGRYLGRYLGPRNKMPVVVPPTLTDLTPIVEKLKKTVRIQLKNNPVVHAPVGTEKMSDEEIAENIEAVLNAIIGKLERGESQVKSVYVKTTMGPAVKIEG
186		TRUE	PFDSM3638_03940	glycosyltransferase family 4 protein	44.9511	9.18467	1	83.4 (M.score:83.4)	3	8.74036	2.87793	186	MRVLVMVNDFPNKDNSYTANIFVKEQVKALSEFVEEINVIVPIPRGIELYRKTSYRDYAIGENVHVHFVKYINPLFPIAYSKLRREWIWLEHRALTNFIKKKDIKFDIIHAHYTWPSGAVGVKLKEEYKVPLVITEHTSQTFNRYITTRDPLAREIWQKADIIVRVRKGDIDLFSRVGITPSKIRYIPNGFDGNKFYPIPQEIARRKLNLVEYEKIIINVANMYSRVKGHEYLLRAFSKVAENTSDAFLILVGSGKLLSHLKKLADNLYLGHRVLFAGSKPHDEIPLWMNAADLFVLPSLRESFGVVQIEAMACGVPVVATRNGGSEEIIISEDYGLLCEPANPKELAEKILIALEKEWDREKIRKYAEQFTWENIAKKTLEVYRGVLK
187		TRUE	PFDSM3638_06295	hypothetical protein	50.0321	9.59867	1	83.1 (M.score:83.1)	2	6.56455	2.74169	187	MNRSLYLIFIIVGYTLGIWTFTVIPKIYMTIGLKGLVLMLVFSAVVVAGVLGQINSIKEKTYRIHEFMVKSARLPAVSVVLVSFLFFVSAVVAHYTGLAVEKLFGIGAPGFGLIIALVAMIILIGTRGRSLDAIAIFSILLIILIIISVFFLRSKVSEVVVKETSREFVRTTLETVFSFSGELNMRTVVLTFLTTLMMFGLGVGFYYIIGMTISGWKFDIKKVLAVVVILQALLSLSAALILTYSIGAAHQAYWSAFEKGKAMEALDVYDKYFLPLWREYTSPERMNFLRLIDTVYGIPDILRKLGMEGGTYIIAFLMISLFFAGFTTLLVLIETGGQIISDMFQVTRKNAILIVSIITGILSTLLSLPAIKEVLVVLVALMLPLFALIESLPALKATK…
188		TRUE	PFDSM3638_01010	MBL fold metallo-hydrolase	30.2767	9.09676	1	83.0 (M.score:83.0)	3	12.963	1.90433	188	MIEITFLGGGGGRFVTITQVRATGGFFIKASKNIYVDPGPGALVRMWRYKIDPRKVDVLFISHRHTDHCNDAEVLVEGMTYGVTKKRGTLIGSKSVVHGDENHTPALSKYHLDALEEVHAPNPGDRFKIGEDEMIITPSLHSDPTTIGFRLKTSYGDISYIPDTEYFEELVKWHDGARVIIAAVTRPRDMRIPFHLSSEDAVYLLKSMKQKPEVFIMTHAGMKMHFAGPYKEAQFIQNLTGVKTYVAKEGFKVSIGKEISVKTLRPARFV
189		TRUE	PFDSM3638_02620	cell division protein FtsZ	44.0531	5.65786	1	82.8 (M.score:82.8)	2	7.84314	1.73886	189	MLEKLLEQAGIKLDFDGEEEKKSEIVDEFSGYKINIAVVGVGGSGNNTISRLYDLGVQGADLIAMNTDAQHLAITKAHKKVLLGKHITQGKGSGGDPKVGYLAAEASAQEIAAAVDGYDLVFITAGMGNGTGTGAAPVVARIVKETARNNGRFQEPLVVSVVTFPFKTEGTVRIEKAKWGIQRLLEYSDTVIIIQNDKLLELVPKLPLQSAFRFADELIARMVKGIVETIKLNSIVNIDFADVYSIMKGGGPALIGIGESDSNNRAVDAVNNALTNKMLDVEFGSGEKALVHFTIGPDVSLEEINKAMEVVYEKLSEKSEIKWGAMVDPEMGKTVRAMVIMTGVRSPYILGNVNALTDSSSWVVPKDRRLIGDPRIEKMFPDFNGSRAGRKRPSVGDAI…
190		TRUE	PFDSM3638_00275	RNA-binding protein	65.9645	8.13108	1	82.5 (M.score:82.5)	2	4.38596	0.974942	190	MEVIKHDGPGRLGVIRLEPPVQTPALAGVDFTLSPFNSFFYPKDYKEYDFNLAPAIPLSYYTPDEIIKKAVKRLWEVDYSKFNAFYFPALKRTKHYEELFKIIEENDFDAIYIGNSKSMIKDYRGFVFTMRELREKFPNAVLITDLEPFFYPLAVYLGIDAFDIRSLKIYSYEGLGFTQFSPIIWDEPKEDPVEYAKKIIRLIRIAIHEGKLRYLVENFLPTSMNAGILRIADRENIEYLEKYTPVDDKTVVFISDYSMTRPEVYRWAKRVRERFEPPKDIELLLILPCSAKKPYSRSRSHTLYRSAVKEALGEKMHRVHELIVTSPYGVVPREWEWIAKYDIVVTGHWSEREVRLAGELLADVLEKYPDIPIIAHVEGGYREAVKLAMELSGRDVIFT…
191		TRUE	PFDSM3638_09170	50S ribosomal protein L23	9.86955	9.69534	1	80.2 (M.score:80.2)	2	25.5814	0.921335	191	MDPYKVIIRPVVTEKAISLIEKENKLTFIVDRRATKQDIKRAVEEIFNVKVEKVNTLITPRGEKKAYVKLKPEYSASEVAARLGLF
192		TRUE	PFDSM3638_09560	hypothetical protein	22.0616	5.13074	1	79.9 (M.score:79.9)	2	10.5528	2.19546	192	MKSAKTIFILGIIAIILSSGCINTKVTTQTAIGEKVERVCLTNEVVGSFEVPQEIREEVEKLFSEASVKGFTVNVILDNSTLSLTFYEFRPSFLPQDFEVAVDGRQLKNTMYLLADEVSVAIAYNNQTFRGKVRIIPKERGEFTYKAKLDEISGEVLLGSFGTKTPEFQVYARKISENTVEVMVKKDDEIVASGVISLG
193		TRUE	PFDSM3638_08310	30S ribosomal protein S9	15.2792	10.3465	1	79.7 (M.score:79.7)	2	20	1.05883	193	MRIIQTTGKRKTAIARAVIREGKGRVRINGKPVEIIEPEIARFTILEPLILAGEEIWNSVDIDVKVEGGGFMGQAEAARMAIARALVEWTGDMSLKEKFMKYDRTMLVGDPRRTEPHKPNRSTKGPRAKRQKSYR
194		TRUE	PFDSM3638_00815	preprotein translocase subunit SecD	55.7784	8.93131	1	77.5 (M.score:77.5)	2	3.9604	1.13742	194	MKWRRILLNFRVIVLIFFLLISITALATRGLTFGLDISGGISITVKLEKPVDSQTMEQVKIALEQRLNTLGVKNIVVEPWGDQFVIVKVANVTEEEADQLIKTIERQGVFYAEFQGIIFATGKDILNVGSVSYDPQHSAWVVPFRLSKEAAEKFAQLALGKAGYPVDMFLDPPVNSTLVVSNRVYEAMLSKTFMLEGDMTLVERIEKAFGIKVVPYANVTPEEIAEIAKGSERIILLDVDGNLSKALKEMGFEVETRSMRSDEDVYDFIKRSLGLYGPYRVSEGLATGNPSTEVMISITAPKTDIQARQDAQVVSVVLRSGSLPVKLSIERIDYISPKLGENFKRQVLVAGIAALLVVGLIVFLHYRKIKIAIPVMFTSFSEVLIILGIAALIRWNLDL…
195		TRUE	PFDSM3638_04895	transcriptional regulator	15.9022	8.40089	1	77.4 (M.score:77.4)	2	16.9118	0.772741	195	MGKPMQVSRYWRHFREKYRLIGGKCENGHLLFPKRPICPICGSRNIEEFQFSGKGKVITWTIVRNPPSGFEYYKPYPLALVQLEEGPVVLAQLTDVEPEEIKEGMEVEMVTRKIREFDEDGLILYGYKFRPIIKSE
196		TRUE	PFDSM3638_00580	hypothetical protein	35.3177	5.89487	1	75.9 (M.score:75.9)	2	11.7834	1.14785	196	MVLINNWGSSRMRVVAKVLFIIFLLWVVYGAYFLVNFQPTISASWGDLWGEKGRAKGSIFVNINLGNPSPIPIKVENLKIRVNDITVGSAENFGIGFLREKLVGNLTIDFWNLTDALISHIENNERSIVELSANIKLFNIIPYNYSITREVDFNVLSYFSNITVPSKKYSGLIISVYTPAIEGIDARWGEVTQEKITIIAKIKLYNPNDFLIVVDNLEGYIYVNGFEFGYARIIEGATIRGKSRGEVVVEITTDEIKLYNAIVSHIENGCVSDVKLDIKFHIGSGGFYGWEVKVPLKDVHTRIEFDPLAYITSP
197		TRUE	PFDSM3638_10120	pyridine nucleotide-disulfide oxidoreductase	45.4656	6.31475	1	75.8 (M.score:75.8)	2	6.05327	1.56797	197	MLESYDVVVIGGGPAGMGAAIKAKELGLKVLLLDDNDFLGGILPQCIHPGFGLHYFKEELTGPEFAYRLINKLDGVEVKTSARVIEIQNYSDLEKFVTYVSPEGVKKVATKTIIYAAGARERHAFEIGIVGDRVAGIYTAGEAQALMDLYGILPGRDIVIVGSGDVGLIMARRFALEGCNVKAVIELMPYPGGLARNLMILKDFNIPLYLSHKVVEVRGRKRVEKVKVVKVDENLREIPGSEFWIEADTLIISAGLIPNVKLLQEIGVRIDPATGGPVVNDRLETSVPGIFVAGNSLLINDLVDYVVEQGETAAEGAKEFIENGGIKSTRWIKLVKGENVRLVAPHYLSGERDVWIYARVQRPIEDVTLEFPEIGKKLRLPVVKPSEMLRIKLRGEEIR…
198		TRUE	PFDSM3638_09415	50S ribosomal protein L35ae	9.72948	10.6203	1	75.2 (M.score:75.2)	2	39.0805	0.758697	198	MRIKGVVLSYRRSKENQHNNVMIIKPLDVNSREEASKLIGRLVLWKSPSGKILKGKIVRVHGTKGAVRARFEKGLPGQALGDYVEIV
199		TRUE	PFDSM3638_06350	allophanate hydrolase	25.8935	5.05918	1	73.4 (M.score:73.4)	2	11.8943	1.81902	199	MKVRVVGDSCIAIIFGEDISEETNRKVHALADYLLNYNPEWLLDVVPSYSALYVYFDPLMIDYREVIDIIGKIKINEVERKEKRIIKIPIAYGGEFGPDIEFVAKYNGLSVDDVIEIHSKPLYRVYFLGFLPGFAYLGGMDERIATPRLEKPRLKVPAGSVGIAGKQTGWYAIESPGGWRIIGRTPLRTFNPEKIPPSIVSPGDYVKFVPIDENEFWEIYREEWGND
200		TRUE	PFDSM3638_02665	indolepyruvate ferredoxin oxidoreductase subunitbeta	21.9607	6.8518	1	72.6 (M.score:72.6)	2	11.3861	1.94632	200	MKEYNIVITGVGGQGILTAANILGWAALRAGYKVRVGEIHGMSQRFGSVIAYVRFGEEVYGAMVPEGKADVILSFEPVEALRYINYLKKGGLVFTNARPIPPVQVSMGIARYPSLEEIKRIVEEDFGGRFLAFDAEKLAIEAGHVVTTNVVLIGALTQTPGFPLSEDHVRDVIKLSVPPKAVEINMRAFDLGVKTAKEMLAL
201		TRUE	PFDSM3638_10345	DUF2666 domain-containing protein	28.8817	6.81078	1	72.6 (M.score:72.6)	2	9.12698	0.918566	201	MIERILEFTAKHEEWIVGENVEDFTNENIAMFLSRVSNTVSSKIPGYLGEKIDVNGLLSIKIEGSLEEKLKALISPKVSRQIGRLVMEDDKKLKKLLVEVAKAVLTREILKNELPIEFPGGKIEGLKIQPRYEEDHINFTARYGSWIVVKRMIIDEKTPLLDIARLLASINETAVNKIKDFADVDDKKIVEYFGGFKKVKKEEEIKEIVQLFREFKGNEFEVRYAAREMLSKLGLKVDVPSKNLEKYLEKAG
202		TRUE	PFDSM3638_02195	glycoside hydrolase family 1 protein	49.7283	6.78493	1	72.0 (M.score:72.0)	2	5.22565	0.834376	202	MPLKFPEEFLFGTATAAHQIEGDNKWNDWWYYEQIGKLPYKSGKACNHWEFYKEDIQLMASLGYNAYRFSIEWSRLFPEENKFNEEAFNRYQEIIDLLLANNITPLVTLHHFTSPLWFMKKGGFLREENLKFWEKYVEKVAELLEKVKLIATFNEPMVYVMMGYLTAYWPPFIKSPFKAFKVASNLLKAHALAYEILHGKFQVGIVKNVPIMLPATDKERDKKAAERADNLFNWYFLDAIWSGVYRGAFKAYRVPQSDADFIGINYYTASEVRHSWNPLKFFFDAKLADVSERKTQMGWSVYPRGIYIALKKASKYGKPLYITENGIATLDDEWRIEFIIQHLQYVHKAIEDGLDVRGYFYWSFMDNYEWREGFEPRFGLVEVDYETFERRPRKSAYIY…
203		TRUE	PFDSM3638_07280	radical SAM protein	68.6769	6.33099	1	71.5 (M.score:71.5)	2	4.2517	1.29068	203	MAENLSAGEVPSGEKEFEALTKRMREIIEFPEISEEEFEEMLKNANRGYGEPLPHRTYSLCPESRRVVPAVVWEKDGMVWITKKCPEGIITDLYSEDVDLYYRFLRWKFEDKKLFSVNVPNTGINCPFDCGLCARHRSHTNLLNIVLTNRCNLSCWYCFFYAREGEPVYEPTLEQIRMMLRNAKKENPIGANAVQFTGGEPTLRDDLIEIIKIAKEEGYDHVQLNTDGIRLAFEPELVKKIREAGVNTLYLSYDGMTPQTNWKNHWEIPLIFENVRKAGGPGIVLVPTLIRNVNDHEAGAIINFGLNHLDIVRGVNFQPISLVGRVPKKERQRFRITIAGAIKKIEEQTNGAISRDDWYPIPIAGYIARFFEAFTGKHYYMTSHYACGAATYVFLDKEE…
204		TRUE	PFDSM3638_00635	indolepyruvate oxidoreductase subunit B	21.9736	8.36916	1	70.5 (M.score:70.5)	2	13.5678	1.24023	204	MEFNIIIAGVGGQGGLTLSRIIGSAAMVEGYRVRIGETLGMSQRYGSVLSYLRFGDSVYSPLIEEGKANLMLALEPVEALRNAAFLGKGSYAIVNAYPIHTATTLVGKEKYPSLEEIKEALEKICRVEMMNFQKEADLINPRTTGVLMLGYAQGKGLLPLKKESIIEGIRLTLREKLWEINFKAFERGRELAKHVCCDV
205		TRUE	PFDSM3638_05580	hypothetical protein	22.082	6.36346	1	69.7 (M.score:69.7)	2	10.7143	0.754309	205	MVRRRGAYPEYTLEDALAVLFLAKEPIGRKQISEILELGEGSVRTLLGRLTKKDLIRSKQRGHFLTTWGHEVKKKIEELFSEPIEVTVDGFPGVAIIVKNPGGFKSLELRDEAIKFDAKGAMILTVKNGEIVFPEDSRPLKEMYPEIVKRLYDYEEGDLIVITWADKIGRALKAALHVAVVLKGDQLPREILEVAE
206		TRUE	PFDSM3638_03975	glycosyltransferase family 2 protein	34.5909	9.68861	1	69.5 (M.score:69.5)	2	6.95364	1.29439	206	MYKGYKIGVAVPAYNEEKLIGETLKGIPPFVDRIYVVDDASKDNTSKVVEEMMRHDKRIVLIRHAKNKGVGGAIVSGWKKGLEEGMDILAVMAGDNQMDPRDLPALLDPIVEGKVDFTKGNRFLLSYDLKMSYWRRFGTFLLTILTKIASGYWHINDPQNGYVAIKADALRKIDLDKLDSGYFFENDLLIKASVANLRVVNVPVKIRYKIGEKSKIKYSKFIARTSWLLLRSFLWRIWVEYVKRRKFLGFLYLLGFTLIVTSFLIFLIYPTRLEIPLIVLLAGAAIFLGSCIKEKNLKQYLK
207		TRUE	PFDSM3638_08345	30S ribosomal protein S13	16.9042	10.8991	1	68.6 (M.score:68.6)	1	10.8108	0.0238542	207	MANFRHIVRVAGVDLDGNKQLRWALTAIKGIGINFATMVCRVAGLDPFMKAGYLTDEQVKKIEEILADPVAHGIPRWAVNRPKDYETGRDLHLITAKLDMAIREDIMRLRRIRAYRGIRHELGLPVRGQRTRSNFRRGQTVGVSRKKK
208		TRUE	PFDSM3638_03345	GNAT family N-acetyltransferase	35.4506	8.33242	1	68.0 (M.score:68.0)	2	6.77419	2.31864	208	MSVRVRLASLDDVKGIVEVHCSSVSKWVKYINGKRVEARYDDLTIAERWSHGGPWMSIETCAININNILINNQYPLVAELNGKIVGELELYIGEEGGLLGKCGYIDVLEVHKDYRRRGVGKALVNKAVEIAKEHKCDTVAVWPVKEAVGFYRKCGISEIAYRIVHVEINLNEIRTKVQEQYSTTSFPNNYDIIKDMIFVTPRIFSSFAAWIKSRWRYAIEKNRTSIEGCIPELNACYIIKGLWNNKSAAELFLWVEDIASINQVLNEIFGIAKKKGITTLHLLIDENVYQEIVNKYPHKVLEHEVLLMKK
209		TRUE	PFDSM3638_02740	hypothetical protein	48.8713	6.91856	1	68.0 (M.score:68.0)	2	5.11628	0.813641	209	MVIDEILELVPSIPDPFVRVLTYGRIGVYLSKIKDPRAGKAFRKAFEELSKIEDPYILVRALLAIGYSTSLAGLKSAKKAFREAISSAQLLPEEIQDIVKAEAIDYLLSLKDTDEAVFYAVEIKNKKLRNKKLLEILEKVLENLEGEKLNKIYKRRKVLLILETIEEPYREEAIVKSIKPLLSLGEYKLVLELINSIGSKLWIAQALNEVLEFLKNNEENSEIVKILIEESEELAKKVGEDIREDIAYIFAIHGFIQQSIEVLKTIPPTTQRIIVREILTSLLSKEDLDKLKILMESLPPDMVLMVKDIIFRILERGSPKMEPMIQVLLEKEGISEDILVGITKYYLELNNLQQAVRVIKRINSERHRSVALGFLAHYLIRIGRVGDAIDVVLNIKDRG…
210		TRUE	PFDSM3638_09330	tRNA(Ile2) 2-agmatinylcytidine synthetase	48.7201	9.16865	1	67.9 (M.score:67.9)	2	5.18868	0.678599	210	MLIHIGIDDTDSPNGMCTTYIGAILYREISKIAEPLDFPRLIRLNPNVPYKTRGNGAVAMSFKIDEEKIKEVKTLVIRYVRELADIDHENTNPGIVFLIGEVPKELEEFSLRALREHVTIEEAEHVARKVNAEVYKFKLGRGIIGGLAAIGYPLEKFTYELLAYRKREYWGTPRRVIKESVFYADKWSYPFTYDNVDPYKRTVLITPHGKDPVLVGIRGIDVGKILQVFEMIKIEEPIEFFQVYKTNQNTDDHLVVKKIKDVKPYDNVVIRGKVAGKYWEKGRHVFFELEDETGKIRVAAFEPTKKFRNYVRKLLPGDEVIIAGGVKEFEGVLTVNLEKFYPVNLVPKVEYEKPRCPKCGGTMKSKGDYLKCKKCGYKMEKILTPVKRPRDLKKKIYEV…
211		TRUE	PFDSM3638_00910	ABC transporter ATP-binding protein	35.8457	6.20933	1	67.4 (M.score:67.4)	2	5.64263	2.18735	211	MAKKILEVKNLKMYYFTSRGPVKAVDDVTFDLEKGEVLGLAGESGCGKSSIGFTLMGMPQPPGRIVGGSIKIDGREIVGLPEDVLRKEIRWQKISMIFQGAMNALNPVYTVGYQMIEPLIYHKGMEREEALDRAMKYLEMVGLDPEVVYRYPHELSGGMKQRVVIAMALLLEPDIVIADEPTTALDVVVQAQIINLMKRLKKKLGLSMIFITHDLSILAEISDRVAIMYAGKIVEIGPSEKIYYEPAHPYTQKLLAAIPRLHEDVEKLEFIPGSPPNLINPPSGCRFHPRCPYVMDRCKQEEPKLIEVDKDHYAACWLL
212		TRUE	PFDSM3638_01295	4-alpha-glucanotransferase	76.2611	5.4562	1	67.3 (M.score:67.3)	2	3.38983	1.47071	212	MGDKINFIFGIHNHQPLGNFGWVFEEAYEKCYWPFLETLEEYPNMKVAIHTSGPLIEWLQDNRPEYIDLLRSLVKRGQVEIVVAGFYEPVLASIPKEDRIEQIRLMKEWAKSIGFDARGVWLTERVWQPELVKTLKESGIDYVIVDDYHFMSAGLSKEELYWPYYTEDGGEVIAVFPIDEKLRYLIPFRPVDKVLEYLHSLIDGDESKVAVFHDDGEKFGIWPGTYEWVYEKGWLREFFDRISSDEKINLMLYTEYLEKYKPRGLVYLPIASYFEMSEWSLPAKQARLFVEFVNELKVKGIFEKYRVFVRGGIWKNFFYKYPESNYMHKRMLMVSKLVRNNPEARKYLLRAQCNDAYWHGLFGGVYLPHLRRAIWNNLIKANSYVSLGKVIRDIDYDGF…
213		TRUE	PFDSM3638_06355	urea amidolyase	36.5872	8.9986	1	67.1 (M.score:67.1)	2	9.42249	0.589434	213	MIEVLSVITSATVQDLGRWGYQRYGVPVSGVMDEVSARIANYLVGNPDNTPLIEFTAGGISIKFHTSAVFAVTGDATLYLNDTQLEPWESYWAKRGDVLTVRLSKGMYGYIAFSGGIECRKILGSCSTYLRAKFGGLLKPGDKLKLGYSLLTGKAGKRLPEELRPRFDKTVRVILGPNIEHFTPEGMRTFLTSEYTVTPESDRMGYRLEGPRIEHSEKGADIITEPIPRGAIQVPANGKPIIMLADAQTTGGYAKIATVIRVDIPMVVQTRPGEKLRFKAVSVNEAVQELRKRERIMNAIRKALQDEWNLYRIKVGKEEFLIFAGMEED
214		TRUE	PFDSM3638_02055	MoxR family ATPase	35.8762	5.22645	1	66.0 (M.score:66.0)	2	8.83281	1.61957	214	MSAKLERIVEEISVAFVGHEDVVRKVLSAALANGNVLFEDNPGLGKTLLAKAFAKVLGLEYRRVQFTPDLLPSDILGTKVWRPEKGTFEIVKGPIFTNVLLADEINRAPPKTQSALLEAMEERQVTIEGETFVLERPFFVIATQNPLEFEGTYPLPEAQLDRFLVRMSIGYPKNESEEVEILKARLRWGKDDPTTDLKPAITKSEFLKMQEDVERNVKIHEDILKYIVRIVRTIREDERVEAGPSPRGGLALMKLAKANAYVEGRDYVIPDDVKEFAIEALAHRIFLKPEYSLEKGIEIEIVREALESVPVPKDLKY
215		TRUE	PFDSM3638_09695	translation initiation factor 2	23.4404	6.77917	1	65.7 (M.score:65.7)	2	11.165	1.6883	215	MEEYYVCPECGSEDVEVIKERGREVTLRCNECGYVWMITLPKLREIPVIVSKHERSFREKAVLPEDEVIKVGDVIEIENDQVKVLSIELPGGKRVRKAKVAEIQTIWGESLTYPKVFGVSIYLPGGITQSFKVVVDREEEFVVGEVIEVGGYTFKVEMIKTEKKLMRSGKAKAENIVRLMGHAIKGRARRKLKIYEGYDSISAENQ
216		TRUE	PFDSM3638_07125	cation:proton antiporter	9.05416	5.9188	1	65.5 (M.score:65.5)	1	11.9048	0.266657	216	MIFFYATLLIGIAGIITFIRLALGPTVPDRVVAVDTLNTLIVAIMLLLGAAYERAIYIDIAIVYALLSYVGTLVIAKYLQGGLQ
217		TRUE	PFDSM3638_05965	rubrerythrin	20.6817	5.23574	1	64.9 (M.score:64.9)	1	5.17241	0.42184	217	MTIQEVREGLPIEKMADFSLEELLGMAIKAEIGAREFYKSLAEKIKIEALKEKINWLAEEEKKHEALLRKLYSQMFPGKEVVFPKEHIGPELQPVARELEKVQDIIDLIRWAMKAEEIAAEFYLKLEEMVKEEEKKRLMRYLADMERGHYYTLRAEYELLLNWEMYSQMMHIGP
218		TRUE	PFDSM3638_08165	myo-inositol-1-phosphate synthase	42.3595	5.62742	1	64.8 (M.score:64.8)	2	7.04961	0.433266	218	MVRVAIIGQGYVASIFAVGLERIKEGELGYYGIPLANELPIKVEDIKIVASYDVDKTKIGLPLSEIVQRYWKGNVPESLQEVFVRKGIHLGSLRNLPIEATGLEDEMTLKEAIERLVEEWKEKKVDVIINVPTTEAFTPFGKLEELEKAIKDNNKERLTATQAYAYAAAQYAKEVGGAAFVNAIPTLIANDPAFVELAKESNLVIFGDDGATGATPLTADILGHLAQRNRHVLDIVQFNIGGNTDFLALTDKERNKSKEYTKSSVVEDILGYDAPHFIKPTGYLEPLGDKKFIAMHIEYISFNGARDELIIAGRINDSPALAGLLVDLARLGKIAVDKKEFGTVYPVNAFYMKNPGPKEAKNIPRIIAYEKLRQWAGLPPRYL
219		TRUE	PFDSM3638_00755	hypothetical protein	21.5307	5.72868	1	64.5 (M.score:64.5)	2	12.766	0.442677	219	MEINEFISQLKLGETVLVEHSSYSKPELLFYGIIKESRMPVVIDDILDTLFEYYNKLKVWGYDLTVFDKVYVIKAGGNEVIGNLLGKLEVGKYVIEAREYTKIIKEVNPPIINPVLGVHKLILLGNLLENLRLLKEISTYVGNENRVAIYFVNRDVVESHSPAALKLLEEISTSVFQLNEENKIKRMK
220		TRUE	PFDSM3638_01045	Fe-S cluster assembly protein HesB	44.4138	6.07485	1	64.2 (M.score:64.2)	2	6.65025	0.54633	220	MILQVALDLTDIEQAISIAEKAARGGAHWLEVGTPLIKKEGMRAVELMKRRFPDRKIVADLKTMDTGALEVEMAARHGADVVSILGVADDKTIKDALAVARKYGIKVMVDLIGVKDKVKRAKELEEMGVHYILVHTGIDEQAQGKSPLEDLEKVVKAVKIPVAVAGGLNLETIPKVIELGATIIVVGSAITKAKDPEEVTRKIIDLFWDEYMRTIKKAMKDITEHINEVADKLKLEEVRGLVDAMIGANKIFIYGAGRSGLVGKAFAMRLMHLDFNVYVVGETITPAFEEGDLLIAISGSGETKTIVDAAEIAKQQGGKVVAITSYRDSTLGKLADVVVEIPGRTKTDVPTDYIARQMLTQYKWTAPMGTLFEDSTMVFLDGVIALLMATFQKTEKDMK…
221		TRUE	PFDSM3638_10455	ABC transporter ATP-binding protein	30.1962	8.46636	1	63.6 (M.score:63.6)	2	10.1124	1.50049	221	MLVVKDLNVEYDNVKVLKGISFALNSGEKAIILGTNGAGKTTLLKSLLGLIPIKSGKIQICGKPYEKVVGEKKVSTNLESVYKLVYSIKVSELIDLYCDLKEIPSQQILNFIKEMKLEHILEKKFYNLSSGEKKCLTNLLAFFTDSKLILLDEPFEGLDPWRTNKTVEILNSLKSSIIMTTHRLDILSKFSTFKVYFLFNGHLYGPIRSASDLVNCYVTFSDIEEGESDIVLRIQGDKKNVILTRRPIGQKISDYASIDEIYRVMLE
222		TRUE	PFDSM3638_09085	50S ribosomal protein L19e	17.8572	10.9291	1	63.3 (M.score:63.3)	1	6.66667	1.31034	222	MNTLKMQRRIAAEILKCGENRIWIDPERIDDVASAITREDIKRLIKEGVIKKKPIKGQSRYRAKIRHEQKKKGRHRGPGSRKGKKTARMGKKELWIKTIRALRKELRKLKAQKKIDRKTYRMLYIRAKGGQFKNKHQLYLFLEEHGLLKK
223		TRUE	PFDSM3638_09180	50S ribosomal protein L3	41.3635	10.1266	1	62.8 (M.score:62.8)	2	6.0274	1.7087	223	MGKVHRPRRGSLGFSPRKRAKSIVPRIRSWPKETEVRMLGFAGYKAGMTHILMIDDEPGLTNGKEIFMPVTIIETPPLRVFGIRAYRMGYLGLETATEVIVPDFPLDNYPAKERKGKPKPKMTFYKLLERRIATLPKNYTQEMFEQKLGQLEDMIKEGEIVDVRAIVATQPWVIKLKKKPEVMEYAIGGTSVEEKFNYIKEKLGKELRVGEVLKEGELLDVIAVTKGKGTQGPVKRWGIKLRAHKDSKGRRKVGSIGPWHPARVMWTVPMAGQMGFHHRTELNKRLIAIGENGKLKLDENTEIEITPKGGFPHYGIVRSDFMMIAGSVPGAIKRIIRVRPAIRPPKKKPPVQRPQITYVSVESKQ
224		TRUE	PFDSM3638_03970	GNAT family N-acetyltransferase	40.8323	9.55029	1	62.0 (M.score:62.0)	1	4.61095	0.761176	224	MNIAEIEVTHKVKEKEWKEFLSRSEYATVYHTPEWKKTLEESFGYKPYYLFVKDESDLIVGMLPLFYVKSKLTGNRLSSLPFSHISGPVGDKATKNFLISEAINLYKNLGASYLEIRDRVEDNRFLSKNMFSTYILELNPNIEEVWKQLHKGSVRRAIKKSEKSGVVVDTAKDIESLKEFYDLNCVGKRKIGVPCHPWKFFKNLFRFMNDYISLYVAKYQNNIIGGGIMIYYKDTVIYGYGAAHPHYLKLYPYNAFLWKSIKDACLSRYKYFDLGRAHYNVERGLMDFKRRWGTIEKKLYYSYYSKNKDLKILDMSGLKYRLGTKVIRKMPMPIYKKFSDRIFGSLG
225		TRUE	PFDSM3638_07155	cation:proton antiporter	54.9437	8.95492	1	61.2 (M.score:61.2)	1	2.94118	2.01975	225	MTWLPFIIIIPLLGAFSMPIVSLLKGKAKEIWASMISFATLIVGIQVFREVWSKGTIVYTLGAPNPFGKATFPIRIVWEVDKFGALMVLIVTFVSFLAVIYSIEYMKHDTGLEKFYTLILILELGMLGIAITGDIFNFYVFLEIMSIASYALVAFRNDTWEGIEAGIKYMFAGSLASSFVLLGIALLYGQYGTLTMGYLAVKIAENPTIVAKVALALFIGGLLFKSGAAPVHMWLADAHPAAPSSISAMLSGLVIKIGGIYAIARIVFSIFSPTINLGTIGWIIIIFACITLIVGNAMAVVQEDLKRLLAYSSVGQIGYILLGLGIGMVAYGTRVGEIALAGAIYHTVNHALMKALLFLVAGAVIHEIGTRNMNELSGLAKTMPKTTFAFLIGAAAIVG…
226		TRUE	PFDSM3638_07965	DNA topoisomerase VI	44.0451	8.28468	1	61.0 (M.score:61.0)	2	5.49738	1.27636	226	MKLKRGKPKEKFSYDPQKVLKKLEDLAYKILEEVKAGKNPYFDVPTRGLSNVYFDEEARLIKLGDKLSRRYFLNVAHARKFMQTLILMAYVKRLVSEGKHASLREAYYANKHTIPGTHENTFEDQSESDPIIEDLERMLGVLREEMHITADRRGYVYGDIVIKDGEDEFNASKLGMGGWAVPGTVEHIQFPEINVDYVLVVETAAMADRLIEEKYPKRERALIIATQGQASRGVRRLIHRLHYEEGLPIIVFTDGDPYGWYIYSTIKQGSINLAYLSEKLATPDAKFVGMTMDDIKEYGLEHVTEKLKGIPPDKKGGPTGDYKRLIEELNYPWFQNKEWQRQLKLALKWGVRIEQQALANKSLEFVAKEYLPEKIREGKLLP
227		TRUE	PFDSM3638_08915	2-oxoglutarate ferredoxin oxidoreductase subunitgamma	19.5786	5.97466	1	60.5 (M.score:60.5)	2	17.2222	2.04875	227	MRKEILLGGFGGQGIILASVILGRAAAVYEGLYAVQTQAYGPESRGGASRAEVVISDEPIDYPKTVSPDYAILLSQQAYNKYLPLVKKGGIVILEEDLIPHRDPELEKDKEVHALPLTKIAEETTGLSLTMNILTLGYFVGITKIVKKESIEKAVLDSVPKGTEKINLKALHKGFELSEK
228		TRUE	PFDSM3638_01490	ABC transporter permease	46.8285	8.70284	1	60.3 (M.score:60.3)	1	3.76471	1.0743	228	MSDFWVLVTKELKDLLRDKGLIFGIIIVPLIIYPALGQMLQVGFEQAQEETKVVLVNFDEGRYGNLLIKALESAPNVTVTKIEAKTLDEALKKAQEEEYNMIVIIPKNFSQAIESNQKASVEIYGIVKGISGSMREAISEGRINAVISILNEYLAKLKIERRIEGDPEAILKPIDAKSYTVIKGRIVEIPPSVVSNIIASQSFSMPLVIFIMIMLVAQMSAGSMAMEKENKTLETLLTLPVKRITIVAGKMVGTAIIGIIAAISYMIGMRNYLGKLTSSAQVSITLEELGLKITPLGATLFLIIIFLTMVFTLSFAMLLAVFAEDTKTANTVVTAGIMPLAFPTFILMFADVNTLPTVLKYLLLGIPFSHPILASRAMLMEEYSTMYVSAVYLGILSAV…
229		TRUE	PFDSM3638_09160	30S ribosomal protein S19	15.3144	10.4387	1	59.4 (M.score:59.4)	2	30.303	0.81966	229	MARKEFRYRGYTLEQLMNMSLEELARLFPARQRRSLKRGLTPEQKKLLRKIRLAKKGKYKKPIRTHCRDMIILPEMVGLTIYVHNGKEFVPVEIKPEMIGHYLGEFAPTRKKVEHGAPGVGATRSSMFVAVK
230		TRUE	PFDSM3638_09500	daunorubicin resistance protein DrrA family ABCtransporter ATP-binding protein	36.3347	8.3744	1	58.5 (M.score:58.5)	2	6.60377	1.71195	230	MKVVEVKDLRKLYPKKIPLPFRKVEYFEALKGITFSVKKGELFGLLGPNGAGKTTTIKILTTLLEPTSGVAKVLGYDVVKEPREIRRRINLVAEGERTLYWRLSGYENLRYFASIYYVPRREAEKRIKELLEMVGLWERRNDLVMNYSRGMKQRLAIAKALINDPEVLFLDEPTLGLDVQSAVFVRELVRKLVDEEGKTVLLTTHYMQEAEELCDRIAIIDHGRIIALDTPEGLKKMVRDNTIVEVKVRNYPGSNPFGLAKVEEQEGVAILRGSIDEEEIPRLVEFLVKNNAKVLSVEVEEPTLEDVFIKLTGRGLRD
231		TRUE	PFDSM3638_05135	AsnC family transcriptional regulator	8.58246	4.7051	1	57.9 (M.score:57.9)	1	21.3333	0.794988	231	MVTAFILMVTAAGKEREVMEKLLAMPEVKEAYVVYGEYDLIVKVETDTLKDLDQFITEKIRKMPEVQMTSTMIAI
232		TRUE	PFDSM3638_02470	reverse gyrase	139.896	7.51307	1	57.8 (M.score:57.8)	1	0.658979	0.296387	232	MKAIYRDMCPNCRGAITDERLAAKNPCDACLDEPISMDDYFQLVTAIRKALKLKGVLKEWEEIYALNKEVKEIEELFKKATGFTFWSAQRSWVKRIIKGKSFSIIAPTGMGKSTFGAFMSIYFALKGKKSYIVVPTTPLVVQTVKKIKAMMEKAEVKVNLVYYHGNLKKKEKDEALEKIKSGNFDILVTSSQFLATRFDELLKDKRIDFMFVDDVDAFLKASKNIDRSLMMLGFNEEIIKKAWEIIKLKKQLAKLLQNESGNEEVEKLNREIERLEREIERYKKENKIGILIVASATGSARGDRIKLYRELLGFEVGSGRSVLRNIVDTYIIPEKSMEEHVEELLKTLGRGGLIFVPIDKGIEYAEQLTNYLKSKGFKVELVSARDKKGLELFEKEEVD…
233		TRUE	PFDSM3638_08870	metal-dependent hydrolase	24.4968	5.97648	1	57.4 (M.score:57.4)	2	12	1.77568	233	MVKVTFLGHAAFYIEGSKKILIDPFLSGNPVASAKPDDFKSVDLILVTHAHGDHLGDVGTIAKRTGAKVVAMYDLANYIAEKYKGVETIGMNYGPTKVDEVEIVQVPAWHSSSDGKYSIGNACGYIVKLDGVTIYHAGDTYVFKDMELFAELYGPIDVALLPIGGHFTMGVREAAKAVELLKPRHVIPMHYNTWPPIAADPEEFKKLVGEKAKVVILKPGESLEL
234		TRUE	PFDSM3638_07860	NusA-like transcription terminationsignal-binding factor	16.444	9.48566	1	57.1 (M.score:57.1)	1	6.2069	1.51619	234	MPLKLTTDQIKYIALFESFTGATVLDCLIDQERNKLIYVIKKGEMGLALGRGGINVRRIEGLIGKEIDLVEHSENPEEFIKNIYRTMGVKVKKVHITEKRDGKKVALLDVNPRDKPRAIGRGGRNINIVKQLMERHHGIEDVIII
235		TRUE	PFDSM3638_05640	type III-B CRISPR module-associated proteinCmr5	19.6744	8.61472	1	56.3 (M.score:56.3)	2	13.6095	0.823996	235	MEVHMLSKDNKKSIRKTLEQRRGEYAYYVIKEVADLNDKQLEEKYASLVKKAPVMILSNGLLQTLAFLLAKAETSPEKANQILSRVNEYPPRFIEKLGNDKDEHLLLYLHIVYWLRENVDRNIDVKTLLSQDYSKVLWATKEAIALLNWMRRFAVAMLKEEGKENEGSS
236		TRUE	PFDSM3638_01630	flagellar protein D	46.6867	4.73629	1	55.5 (M.score:55.5)	2	5.47264	0.906771	236	MEELGYVTDAEINAKLAELKGKVPSVVINELREKLMAKKDSLTPRQLDEIVKRVLEAYGSQAAKYEQISKRVDELGKKLSDLSSQLARLVEALEEKKFAVHEKKAEAVAEKAAEVSEKIEKIEEMLEEKPRKSEIEKKLEELHRKIEELSERVAKEKVEETKARIEELEEKIAKGEEIKPEEIKEIEEEVEELGEFEEAPVEEIVVEEEKPPEPVEEVPVVEEKKEEVIEEVPVEEVVEEEKVPSHVVEEEKVEEEGGREMAEKMKIPEDIASLLFEEEPRKARLEEIPDDVVSIMIALKWLGFLIDRVGIQNLEKVLEFYYDIGWISEKVFNQLLRFAKGTRPHHRDPEWKPAEKLTVQDHLISLLFIERLRGLRITRDVLDKLEREIKMLEKTLDEF…
237		TRUE	PFDSM3638_09165	50S ribosomal protein L2	26.0211	10.3792	1	55.2 (M.score:55.2)	1	4.60251	0.0647508	237	MGKSLIQQRRGKGSPTFKSPSHRFRGAVKYIPLNYTQEKTLRGVVEEIMHDPGRTAPVARVKFENGIEKLIIAPEGLLVGQEIYIGPDAPIAVGNTLPLAKIPEGTYVYNIEGIPGDGGKYVRAGGTYALVVSREPDKVIVQLPSGELKAFNPMCRATIGVVAGGGRLEKPLVKAGKAYYKYKARNKFWPTPRGVKMNAVNHPFGGKEHHPGKPTTTSRRAPPGRKVGHIAARRTGRRK
238		TRUE	PFDSM3638_00695	hypothetical protein	30.596	4.66846	1	54.5 (M.score:54.5)	1	6.08365	0.565069	238	MRIEVPSRDHMNELSKALSKAGIMNRPKEEMNIEISNLIVFKDTFSKLTEVPFEEVRKRLGEVERIYRTFIKMLKEKELSFEEIDEEYVEILEALENANAIEIIGDKLKLVKDVSLEDLEFEVSIPLEEIYERVEEFEKAGGKLVTEVILSKKYYVEVMEVDLEAIQKALEIAENYAEEHVITRAALEGLARSTLAELILNMANEVNRKNELIDILLALEPVSLEGEKSEMRVYFERDAIEDFLKELQTLGYIKVKGNRIWFY
239		TRUE	PFDSM3638_09740	sugar ABC transporter permease	33.8404	9.62954	1	54.2 (M.score:54.2)	1	5.03356	0.127055	239	MKKTTVAALMLIIPGIAAFLFFNLWPIVYSIYLAFTNAKLGNFPIQSPTAEPLRFVGLENFKWLLKQEKFLNAFKWTWIFVATSVTLKVLAGLFLSLLYNSKYVRGKTIYRSLLIIPWALPLLFSVTVWKFMFDPVFGPINLTLKSIGVEGPNWINDPFWGFIALNIIEVWLAYPFMMTVITAALQSVPDVLIEAAIIDGANYWQRLRHVVLPVVGKPIAFATILTSAASFQYFMVPYIYNAGLFEDRFILLYGFRQAFGATPYYGRATAVMIIATIILAIYMYVNVKITRLQEGAKE
240		TRUE	PFDSM3638_00160	hypothetical protein	24.5411	8.55256	1	54.2 (M.score:54.2)	1	8.55856	0.416527	240	MDKLTKVVLIAIVIIGIVGVAITLSVKHYQGGEIYEASNDAMNYLVRGFNVTIKVETVDGKIISGELFSAQGSTITIIVNGTRVTVGGPAATKENFRAKHIEVIKRGKVYVYEVPGTEGEGYEEFSKYIKEETYSERFSGTIYVENISIIEIGKLKYLADYTTYGSITINKISGNNAILTASMVPVEILRDNLKGKRVFFYGILLVNSENRTHKLTLIEVRS
241		TRUE	PFDSM3638_01260	8-amino-7-oxononanoate synthase	43.7831	6.04772	1	54.2 (M.score:54.2)	2	5.82278	1.06624	241	MGKLDWIREELEELKKKGLYVTIRVLQSAQGPWVIVNGKKVLNMCSNNYLGLAAHPKIKEAAIRAILDYGVGAGAVRTIAGTMDLHVELEEKLAKFKKREAAILFQSGYNANLGAISALLRKGEDGVFLSEELNHASIIDGMRLSGAPKVIYKHLDMEDLKKKLEENKDKKKKIIVTDGVFSMDGDLAPLPEIVELAEQYDAIVYVDDAHGEGVLGSHGRGIVDHFNLHDKVDFEMGTLSKAFGVIGGYVAGPEEAIEYLKQRARPFLFSSAPNPPDVAAAIAAVEILQKSDDLVKKLWDNTHFLQKGLRDLGYDLGNTKHPITPVMLYDEKLAQEFSRRLFEEYNIFAQAIVYPTVPLGTARIRLEPSAAHTKEDLKLVIDAFEDLGRKTGFLK
242		TRUE	PFDSM3638_05380	hypothetical protein	48.5785	9.21928	1	53.6 (M.score:53.6)	2	6.51163	2.03017	242	MSEIRFKIRDYLKAITGLLLVIWLFKGWLGLEKYNEYMVWAIIGLIVIVEVLGVGRWFGVTLSGIIFSLAKAAFLISLFLFVGKWLGIPEDFPVTSKMAFAYFVVLSIAGILVGGIETPRIRKKEDIIPKVEKKAYEFNDLDFGDVKVRGEGKAYPLKFGRKRVGWAIEGSVEVEAQTPLGSIRRKLISPVVIWTSQDIKGRKVTANENFVRTVEALLHQKSLRVREDEVALDLGILKVYDSDNYTYVKMPFLEIVDTPSGSEVKIGPLKIRDGRPRKIDEEMVTIEELRNGFRLTKIGSNLRIKTEDYDIEIENDKISYRSGSEKLTIAEDYVAISSNGISVSVGKDYAKLRIEDSIISARNGVVKIRIGGKTYTLNSREAYKKVIEKAKDIVKIEGE…
243		TRUE	PFDSM3638_03110	hypothetical protein	12.6387	9.97732	1	52.8 (M.score:52.8)	2	22.2222	0.85429	243	MPRWGRGRRRKMRMIEFIPYARHFYPALPRFGPPKPPIIMTYEEFEALRLVDYEGLTQEEAGKRMGVSRGTIWRALTSARKKVAQMLVEGRELIILPQGNEVIKSDEE
244		TRUE	PFDSM3638_01695	hypothetical protein	29.4489	5.34982	1	52.0 (M.score:52.0)	1	5.68182	1.53351	244	MFIKKDNKVELIQGIPHGSHLDTVLGYAERLSEILSMKGEQVGSVVFEKGRIIKKKLKLKIYDVPLGVITFRVVTDEKNVLLTTYPMLEDLVEVEARILKVLEWKEWPEGDIVCEVSNEYGPQITFFAVDYLMKKDEYVRRENAKVGVGLLLYFLKVGVDARKEVQGPGGENIVIDLSEAEVLLPGTLNGGFIDDYIFTGHVKEFREVNVLGKDGYLLKISIEPLGLVPAFVLKERVKGEIEKDAAVYGMGWLQGKVIGAPAGI
245		TRUE	PFDSM3638_06460	TATA-box-binding protein	21.2983	5.03141	1	50.7 (M.score:50.7)	1	8.90052	0.193161	245	MVDMSKVKLRIENIVASVDLFAQLDLEKVLDLCPNSKYNPEEFPGIICHLDDPKVALLIFSSGKLVVTGAKSVQDIERAVAKLAQKLKSIGVKFKRAPQIDVQNMVFSGDIGREFNLDVVALTLPNCEYEPEQFPGVIYRVKEPKSVILLFSSGKIVCSGAKSEADAWEAVRKLLRELDKYGLLEEEEEEL
246		TRUE	PFDSM3638_07165	hydrogenase	18.2905	5.95084	1	50.5 (M.score:50.5)	1	5.98802	0.0446315	246	MTNNSERKRLEKRIAQLCKFIGRSPWVFHVNSGSCNGCDIEIIAALTPRYDAERFGVKLVGSPRHADILLVTGPVTNQSLERVKLVYEQTPDPKIVIAIGACPTGGSVFYESPFTNAPLDRIIPVDVFVPGCPPRPEAILHGVVLALEKLAKMIKGEVPPEEGEENE
247		TRUE	PFDSM3638_02710	type II methionyl aminopeptidase	32.8216	6.63155	1	49.5 (M.score:49.5)	1	3.72881	0.963225	247	MDTEKLMKAGEIAKKVREKAIKLARPGMLLLELAESIEKMIMELGGKPAFPVNLSINEIAAHYTPYKGDTTVLKEGDYLKIDVGVHIDGFIADTAVTVRVGMEEDELMEAAKEALNAAISVARAGVEIKELGKAIENEIRKRGFKPIVNLSGHKIERYKLHAGISIPNIYRPHDNYVLKEGDVFAIEPFATIGAGQVIEVPPTLIYMYVRDVPVRVAQARFLLAKIKREYGTLPFAYRWLQNDMPEGQLKLALKTLEKAGAIYGYPVLKEIRNGIVAQFEHTIIVEKDSVIVTTE
248		TRUE	PFDSM3638_00100	ABC transporter ATP-binding protein	36.165	8.64741	1	49.3 (M.score:49.3)	1	4.96894	1.84446	248	MTMVDVISVTKTFSTPKGKVVAVDNLSFKVKRGQVFGILGPNGAGKTTTLRMMATIYRPDSGRILIDGIDVVENPNEARKRMAYMTQEPDLSPTLSVRDYITYYFRFRGLSKREARERCSYALKTFNLEEHANKKPFQLSTGLKRRVQLACVLSSDAPLVFLDEPTAGVDPKSKRDAWELIGEMVREKDMTIILSSHDLYEVEYLADEVLIINYGKAVAQGRPSELKRRFGKTLRIVTKNPILDFEKLRDTLTSIEMVENVRAITKNSFEVKLNSLDAPINDVLQATMSLGLEIVDAFTATLTFEDVYLSIVDVGGEINGKR
249		TRUE	PFDSM3638_05720	ribosome biogenesis protein	7.2188	10.1057	1	48.8 (M.score:48.8)	1	18.3333	0.359162	249	MRFRIRKCPKCGRYTLKEVCPVCGEKTKVAHPPRFSPEDPYGEYRRRWKREVLGIGRKEK
250		TRUE	PFDSM3638_00055	RNA 2',3'-cyclic phosphodiesterase	20.9824	8.56751	1	47.3 (M.score:47.3)	1	6.52174	1.67422	250	MRAFIAIDVSESVRDALVRAQDYIGSKEAKIKFVERENFHITLKFLGEITEEQAEEIKKILEKIAKKYKKHEVNVRGIGVFPNPNYVRVIWAGVENDEIIKKIAKEIDDELAKLGFKKEGNFVAHITLGRVKFVKDKLGLAMKLKELANEDFGSFIVEAIELKKSTLTPKGPIYETLARFELSE
251		TRUE	PFDSM3638_08715	hypothetical protein	26.124	4.78307	1	46.7 (M.score:46.7)	1	6.61157	0.392121	251	MRRGLSLLGFIIGAVIGIIIGALILAGIFLLALGSTISFLDFPNCHCTCETINNAGPIKEIGAYNATSLIIEDVIGTVKIKPSNEPQIKVLSNLPINVSVSEDSLVITCSECREKSFKNGEIILMGNLSSIKTSDILGRLIVEVPTKRIEVGDVLGEVNIQAYTEVFESEDILGRAEIKATREVQIEDVIGEVKITIPKNSTAKISYSKIIGKIADLSEDSNKIVKVDIEDILGELTVENEK
252		TRUE	PFDSM3638_00855	V-type ATP synthase subunit A	113.381	6.09782	1	46.1 (M.score:46.1)	1	1.1846	0.425119	252	MPAKGRIIRVTGPLVIADGMKGAKMYEVVRVGELGLIGEIIRLEGDKAVIQVYEETAGLKPGEPVEGTGSSLSVELGPGLLTSIYDGIQRPLEVLREKSGHFIARGISAPALPRDKKWHFTPKVKVGDKVVGGDIIGEVPETSIIVHKIMVPPGIEGEIVEIADEGEYTIEEVIAKVKTPSGEIKELKMYQRWPVRVKRPYKEKLPPEVPLVTGQRVIDTFFPQAKGGTAAIPGPFGSGKCVDGDTLILTKEFGLIKIKDLYEKLDGKGRKTVEGNEEWTELEEPITVYGYKNGKIVEIKATHVYKGASSGMIEIKTRTGRKIKVTPIHKLFTGRVTKDGLVLEEVMAMHIKPGDRIAVVKKIDGGEYVKLDTSSVTKIKVPEVLNEELAEFLGYVIGD…
253		TRUE	PFDSM3638_04155	ABC transporter ATP-binding protein	33.2688	9.0848	1	45.1 (M.score:45.1)	1	5.11945	1.44631	253	MEAIAVEDLTKSYGEIKALDSLTFSVQEGNILGIIGPNGAGKTTLIRILSLLLKPDKGRILLYGHEVNSRKSEIKNFFALLPQEAKAHFYTLTPFEYIYHYLRMRGFSRKDAKIRAGKAVEEFGIDYADKIMSTLSGGMVRKTLLAMILSADAKIYYLDEPTVGLDVENRLKLWEILREKSKNSTVVITSHYLNEISSVCDNVLLLKKGRVVAFGKPEKIARQYLSQFHSKIVVFGEFTKEDYTTRRAGKNTFVYAKSKSEEREVIEELKDTGIPFKREELTIEDIFLVGNLR
254		TRUE	PFDSM3638_00550	hypothetical protein	8.55261	5.38485	1	44.8 (M.score:44.8)	1	20.7792	0.331487	254	MVMRLSKIYGKQIYTTKGKYVGYVDEVIIDIDEGRGEVVLLALPGERVGVPYERVTAVGDIILVEATTEKKRISQEG
255		TRUE	PFDSM3638_01775	50S ribosomal protein L18a	9.32116	9.73283	1	44.2 (M.score:44.2)	1	16.8831	0.838211	255	MKVKVFRVHGYFEKNGRKFKFTKEYRGIKEEDVKELVYSDIGSKHKVKRNKIFIKEIKEIRPEEAEDIVVRRLSLEL
256		TRUE	PFDSM3638_05005	hypothetical protein	35.6834	4.76577	1	43.9 (M.score:43.9)	1	3.55987	0.274739	256	MRKGILIFTLISFLLLNTPVLAQEPLNNIDLQPFLKLTMNVTLVNTGEYPKFIAVNPTYDFKTFREGDEYLLHNTTDLIQLSKANLILNKRVGFWIYPHEVLKVEFSINIPMDLGELYLQDYADLCYPDYTITWSTKRITYPPSLGVGPLCEVVYPHLINYPILVDLTSFIQVRDPEIVIYSYSGEVEFTITNRGPKTMFAVALPLIPVDAKIYSITPNPDMNYTEYMGKFLPTYLKSQVQNAKFNLTQESVLFEYTDTLLSTMSSQQNLIQNSITTNEDIVDYPIWIVVLGENSSFDIKYKFQWEFTR
257		TRUE	PFDSM3638_07200	CGP-CTERM sorting domain-containing protein	69.8826	4.87055	1	43.9 (M.score:43.9)	1	1.57729	12.4023	257	MRGKILSFLIVLTLLALPTTAQCPSLGRTVVLKAPAVSMTSTGEMIGVPTEFVITVAPGSGHVYVETWPLTEVDMQASARLAAEIAGVVTGKDMSKYDVFIQVRADSPIIGGPSAGGTMTVGIIAALMGWDVRSDVMMTGMINPDGSIGPVGGILEKASAAHQAGAKIFLIPKGQRIQVVTETQKKQIGPITQITTTQRKVDVVEYAQERWGLKVIEISDIYEAVYYFTGHKLEKPQPPQNVVISTSFLEGEAKSDYEETLQYYNTISNKLKNSEVGYTTYSYLKAALDNAKSTLDNAKNALDSGKYYTAMSLSFQARIVIRHVDWYIDLYEGKDIEDIFSEVKDEIDRIESYISNLTIRGVTMLQAVAAAETRIEEAKEYLKEAQISYYNQDYWNAIG…
258		TRUE	PFDSM3638_03000	aspartate carbamoyltransferase regulatorysubunit	16.8791	7.63612	1	42.8 (M.score:42.8)	1	7.23684	0.855316	258	MAELKVSAIKEGTVIDHIPAGKGLKVIQILGLGELKNGGAVLLAMNVPSKKLGRKDIVKVEGKFLSEEEVNKIALVAPTATVNIIREYKVVEKFKVEIPDVIEGILKCGNPNCITHYEYVTPKFYVISKEPLKVRCHYCERTMEEEEILANL
259		TRUE	PFDSM3638_02025	mechanosensitive ion channel family protein	37.4005	9.10947	1	42.7 (M.score:42.7)	1	2.69461	0.687634	259	MNIPWEGIINALVAVAVGVIISGLIYKWILSLSKSTKYIWIFNEETAKLVRNFIIIGSVLYALDALGILDIEVFGSKLSSLITGLLLFYVAYQIGKRAQKYLAIKGGPDAQIKAKIFFYVLVTLAFFLALNIMGLTGRLSTIIAAAGITGIVLGFASQTVVSNFISGIFMYFDKPLKIGDPVEVAGYSGIVHDIRIFSTRIRTWDGLLVRIPNEKLFNSDIKNLMKYPARRVDIVVGIAYKEDAQKAIEVIKRVLDEMPYVLAEPEPMVFVDNLGDSSVNIAVRAWAPTQKWFDVRTQIVQKIKEALDREGIEIPFPQRVNWFAEELRVKLEKD
260		TRUE	PFDSM3638_04515	hypothetical protein	38.6881	6.48714	1	42.4 (M.score:42.4)	1	3.62538	1.12508	260	MHLRYYAPCYEKETHEKILNYLEDIKKLHNINYEEIPVRHWVPEWYSRKAEISEAYVYDNHLKPYSSLILSNCNKLLQMGLDLHCDTVSSKFKSRSGNIYVAGTIAVVENGVTLLALADKDEIFEFLKALLREGWNLLNMLEKTKPKTIVEPREREKEIKRALILALSKNFDYVLMDVKLNALSGDEWDPFIYFSPDADIIAVNERENHIIGIEVKGYRSNKGIIQKANIYEAIGEAMMYLLNPYMKYKGEKIEGSIFDEVWLCYPYKRDFEDFKRVIEITPIGLLSAYEGVVKRPEKNPFVNERAKEIFLENLSTFRSYIQGGRKMHKIV
261		TRUE	PFDSM3638_10025	transcription elongation factor Spt5	16.7812	7.89342	1	42.0 (M.score:42.0)	1	6.57895	0.905916	261	MAGKIFAVRVTHGQEETTAKLIYSKVRTYNLPIYAILAPSRVKGYIFVEAPNKGVVDEAIRGIRHARGVLPGEVPFKEIEHFLEEKPAVSGLEPGDLVEVIAGPFKGQKAKVVKIDESKDEVVVQFIDAIVPIPVTIKGDYVRLISKLQKEE
262		TRUE	PFDSM3638_06960	hypothetical protein	32.3306	9.13062	1	42.0 (M.score:42.0)	1	3.2491	12.4204	262	MKICLISWKKFKYILNQKHNGMREIINYDGPEIFREIVSQKFTRLVEALEALGVKINEVSLRGREITVNRYMVLYIVGEIVISEKSGLFLREIKHLIGPILRSINDEIQREVRPVGYYSYIDVDKFRLSMSREQEENRQNIVVDVPEEYEKEVKRVAKGIAIFLSDNNVNFDTLVISGYLVKDILKIRVVLMPVGEYEEDKLEKLLRGVAEKYTSYLRERGLKAILDDIEVITTKIKPWVSIALKRKRLAEREASQIVSDEDIQLVVQKFRGKLSRN
263		TRUE	PFDSM3638_04455	hydrogenase	43.3704	6.29926	1	41.7 (M.score:41.7)	1	4.35967	1.12153	263	MRYVKLPKENTYEFLERLKDWGKLYAPVKISDKFYDFREIDDVRKIEFHYNRTIMPPKKFFFKPREKLFEFDISKPEYREVIEEVEPFIIFGVHACDIYGLKILDTVYLDEFPDKYYKVRREKGIIIGISCMPDEYCFCNLRETDFADDGFDLFFHELPDGWLVRVGTPTGHRLVDKNIKLFEEVTDKDICAFRDFEKRRQQAFKYHEDWGNLRYLLELEMEHPMWDEEADKCLACGICNTTCPTCRCYEVQDIVNLDGVTGYRERRWDSCQFRSHGLVAGGHNFRPTKKDRFRNRYLCKNAYNEKLGLSYCVGCGRCTAFCPANISFVGNLRRILGLEENKCPPTVSEEIPKRGFAYSSNIRGDGV
264		TRUE	PFDSM3638_03935	hypothetical protein	67.1272	9.22141	1	41.5 (M.score:41.5)	1	2.04778	1.35062	264	MGEYCEKDFRSLQRCAEMNNIRIFKFLVILYSLLLIASSFVYYYREDIYIRPESYFYLLTLAVGVTFAQIIFFGRNSRSEVKFLIFVEVLLVALSFTLTQQALYKTVLGRDPWFHWILVEEIVKRGSIPPYEQIPIPYVRMPNFHLVIASGIVLTNLSYKWAQVLFAGFPTLILLMLVAFLYSKKLFDDQVGLVSILLVAISDNVLDMVGKNIVPNTLGVALAFLIFYLIYFREYHNLMIKFLSVLVAIALAFMHTVSLTFLIWQIFVISILSLILKDKSAKFYLAHFAFLIVSALFVWGIYSGFYLKSLVIIFKQLFIYGFDIERYEAKLPTTFLDAVIARSGMVLYFAIAGIITFYLLVKTLKRRAFGIKLSTLSSILATISILAGAVSFLTPALSG…
265		TRUE	PFDSM3638_04860	pyruvate ferredoxin oxidoreductase	12.0037	5.199	1	40.8 (M.score:40.8)	1	16.1905	1.48542	265	MAESPFKADIERAQKELSEKMTPGAIVYIPGSSVINKTGSWRVFKPEFNRDKCVRCYLCYIYCPEPAIYLDEEGYPVFDYDYCKGCGICANECPTKAIEMVREVK
266		TRUE	PFDSM3638_07755	acetyl CoA synthetase	49.9332	6.02348	1	40.7 (M.score:40.7)	1	3.67965	1.6459	266	MSLEALFNPKSVAVIGASAKPGKIGYAIMKNLIEYGYEGKIYPVNIKGGEIEINGRKFKVYKSVLEIPDEVDMAVIVVPAKFVPQVLEECGQKGVKVVPIISSGFGELGEEGKKVEQQLVETARKYGMRILGPNIFGVVYTPAKLNATFGPTDVLPGPLALISQSGALGIALMGWTILEKIGLSAVVSVGNKADIDDADLLEFFKDDENTRAILIYMEGVKDGRRFMEVAKEVSKKKPIIVIKAGRSERGAKAAASHTGSLAGSDKVYSAAFKQSGVLRAYTIGEAFDWARALSNLPEPQGDNVVIITNGGGIGVMATDAAEEEGLHLYDNLEELKIFANHMPPFGSYKNPVDLTGMADGKSYEGAIRDALAHPEMHSIAVLYCQTAVLDPRELAEIVI…
267		TRUE	PFDSM3638_07495	glycine cleavage system protein H	15.1327	4.31577	1	40.6 (M.score:40.6)	1	11.194	0.646919	267	MIEVGEYKIKEGLYYTKEHEWVQVLEDGTVLVGITDYAQKELGDLAYVELPEVGKVVEKGDVLCEVESVKAVSEVYAPVSGEVIEVNEELADSPEKINEDPYEAWIAKIKPKNLEEELKELMDAKAYAEYLKTL
268		TRUE	PFDSM3638_07225	NADH-quinone oxidoreductase subunit C	20.9168	5.8969	1	40.6 (M.score:40.6)	1	6.32184	0.384757	268	MTWEKGEEIVKQILEKAPYAEGKVRRERRLEFRVPADKIRDFLRIMKESNFPLMLQITAVDWPKEGEIELVYHLINVELGTHAMVKTRIPRDLDKARMPTVKDIYPAAETYERDVHDFFGVYFEGNEKMEMPWILDDPERGLYPHRKDFDMLAYVKKKYKILDRFDEDKDKYVI
269		TRUE	PFDSM3638_07990	signal peptide peptidase SppA	37.2886	5.5581	1	40.3 (M.score:40.3)	1	5.16717	2.10441	269	MPEGVWKYISFILALVLSFSIAANALLYLQVGELQSTTYKLQKILPSQTNITTNYTTLQLKIEELKKEIEYLRAYIQKQNETANGSLAIVPIFGLIDENMALEVVKKLEVIKSDPSIRGVLLWIDSPGGYIGPVRAIYKEVKELAYIKPIVAYISGYATSGGYYIACGADKIIADPYAQVGSIGVIYVHFNAQKYYEMNGIEVEVFKTGPYKDMGADWRGLKPEEREIIQKQIDVYFKTFLDVVMEGRNLNETKVKEYADGRAWFAYEVNGTLIDDIGDLQYAIEETKKLANLKSANIVIFDVKPSNFEIRGSSALYLPQEYVYKYIRR
270		TRUE	PFDSM3638_06880	30S ribosomal protein S10	11.7414	10.2275	1	39.8 (M.score:39.8)	1	8.82353	0.322556	270	MQKARIKIASTNVRSLDEVANQIKQIAERTGVRMSGPIPLPTKRIRITTRKSPDGEGSATFDRWELRVHKRLIDIEADERAMRQIMRIRVPEDVTIEIELIS
271		TRUE	PFDSM3638_05200	50S ribosomal protein L21e	11.3343	11.416	1	39.3 (M.score:39.3)	1	10.3093	1.05237	271	MVQKAHSFRRKTRKKLSKHPRRRGLPPLTRFLQEFEVGQRVHIVIEPSYHKGMPDPRFHGRTGTVVGKRGEAYIVEIKDGSKVKTLFIHPVHLRPQK
272		TRUE	PFDSM3638_09120	50S ribosomal protein L24	14.3229	10.3642	1	38.4 (M.score:38.4)	1	7.43802	0.633808	272	MKISSKQPRKQRKFLYNAPLHVRQKLMSAPLSRELREKYKVRNLPVRVGDKVRIMRGDYKGHEGKVVEVDLKRYRIYVEGATLRKTNGTEVFYPIHPSNVMIIELNLEDEKRKKIIERRAG
273		TRUE	PFDSM3638_01690	aldehyde ferredoxin oxidoreductase	66.589	5.67324	1	38.2 (M.score:38.2)	1	2.97521	0.0195499	273	MYGNWGRFIRVNLSTGDIKVEEYDEELAKKWLGSRGLAIYLLLKEMDPTVDPLSPENKLIIAAGPLTGTSAPTGGRYNVVTKSPLTGFITMANSGGYFGAELKFAGYDAIVVEGKAEKPVYIYIKDEHIEIRDASHIWGKKVSETEATIRKEVGSEKVKIASIGPAGENLVKFAAIMNDGHRAAGRGGVGAVMGSKNLKAIAVEGSKTVPIADKQKFMLVVREKVNKLRNDPVAGGGLPKYGTAVLVNIINENGLYPVKNFQTGVYPYAYEQSGEAMAAKYLVRNKPCYACPIGCGRVNRLPTVGETEGPEYESVWALGANLGINDLASIIEANHMCDELGLDTISTGGTLATAMELYEKGHIKDEELGDAPPFRWGNTEVLHYYIEKIAKREGFGDKL…
274		TRUE	PFDSM3638_00780	metalloprotease	40.0883	8.92277	1	37.9 (M.score:37.9)	1	3.79404	0.222724	274	MIILGFWAIISILGATVLKGKEGVEIAPFQLLWRTKKFLNFIDNVGSKHRGFWKFYGDLGIIVGFVGSIVVFAYFIKQTLLILFPPAPQQPLPSVQLVIPGITIPLGYGLLGLAVVIIVHELSHGFLARAENLSLKSVGLVLFFVIPGAFVEPDEEELKRAPLRSRLRVFGAGSMANIITGLVALILMSVVGLAFVPGGIVVGGVIKDSPADGVLKPGDVIVEINGHPVPTLEDFIEVMNKTKPEEVITLTVLRDNERINISLKLSQHPGNPEKGFIGMYPGQNIDSRIGLKTPLLVLFLSLYWIYVLNIGIGLMNLFPLIPLDGGRMIMDTLKEFLPEKPAKVIGYSIMGIGLILLGINIVVAIRGMI
275		TRUE	PFDSM3638_10350	transcriptional regulator	15.7213	7.6484	1	37.7 (M.score:37.7)	1	6.06061	1.26078	275	MKIRELIEKLNEKQKKTVMSCLSKCEILDLDEEIETYPSKEISRFLKVISNPIRYGILKMLNDRWMCVCLISEALEIDQTLVSHHIRILKELDLLEERKEGKLRFYRTNKEKLREYLEKVLEDFNHGTSKGS
276		TRUE	PFDSM3638_02745	GTPase	50.7244	5.97445	1	37.7 (M.score:37.7)	1	3.34821	2.45784	276	MAEKKRRRVVILGAAGRDFHNFNVFFRDNPDYEVVAFTATQIPDIEGRIYPPELAGELYPNGIPILPEDDLEKIIKEHDVDIVVFAYSDVSHEHVMHLASRAHSAGADFWLLGPKSTMLKSSKPVVAVTAVRTGCGKSQTSRKVAQILQEMGFKVVAVRHPMPYGDLRKQVVQRFATFEDLDRYECTIEEREEYEPYLERGMVVYAGVDYEKILREAEKEADIILWDGGNNDFPFFEPDLWIVVTDPHRPGHELTHHPGETNFRSADVIIINKIDTAPPENIQKIRENIEKINPNAIVIEAASPIFVDKPELIKGKRVLVVEDGPTLTHGGMSFGAGYIAAKKFGAKEIVDPRPYAVGSIIETYKKYPHLSNILPAMGYGKKQIKELEETINRADADVV…
277		TRUE	PFDSM3638_04475	ABC transporter ATP-binding protein	23.1377	8.40708	1	37.7 (M.score:37.7)	1	5.82524	1.66922	277	MKLEIRDLSVGYDKPVLERITMTIEKGNVVNFHGPNGIGKTTLLKTISTYLKPLKGEIIYNGVPITKVKGKIFFLPEEIIVPRKISVEDYLKAVASLYGVKVNKNEIMDALESVEVLDLKKKLGELSQGTIRRVQLASTLLVNAEIYVLDDPVVAIDEDSKHKVLKSILEILKEKGIVIISSREELSYCDVNENLHKYSTKIDKKD
278		TRUE	PFDSM3638_07700	pyridoxal 5'-phosphate synthase lyase subunitPdxS	36.8763	5.76254	1	37.6 (M.score:37.6)	1	2.98507	0.384527	278	MDKMKIIMEKGTERLKRGFAKMVKGGVIMDVTNAEQARIAEEAGAVAVMALHKVPADIRKAGGVARMAPVEKIQEIMDAVTIPVMAKVRIGHEAEARILEALGVDMIDESEVLTPADPFFHIYKKKFTVPFVCGARNLGEAVRRIWEGAAMIRTKGEAGTGNIIEAVRHVRLVNENIRLIQRMTDEEIYGVAEKFAEPYLRLAFSVKEISGLPKRVLENEPIYEGFTYREIVDGLYKILLEIKKLGRLPVVNFAAGGVATPADAALMMAMGMDGVFVGSGIFKSSNPPAMARAIVEAVNHWDEPDVLAEISREIGEPMRGQDIAELEVRMEERGV
279		TRUE	PFDSM3638_09985	D-tyrosyl-tRNA(Tyr) deacylase	30.5928	5.75666	1	37.5 (M.score:37.5)	1	4.81481	0.266611	279	MKVIMTTKIDKASMNIREKLIENFGFTESNLTFDGNRVYEKEDILILTTNEEMIYYDYLDKEIEKQTKIKPEVIVFASRHSSAKKLPSLTTHVTGNWGKAMYGGKDESFAIAFPSAMKLALLKMHELNDLGWTVCYEATHHGPSELEVPSLFIEIGSSEEEWVNDRAGEIIAETIMYVLKKREKFKVALGIGGGHYAPKQTKVALESDLAFSHILPKYAQPVKKEVILRALSRSTEEVEAIYVDWKGSRGETRQLAKELANELGLEFIKD
280		TRUE	PFDSM3638_04870	pyruvate ferredoxin oxidoreductase	43.9322	5.28103	1	37.1 (M.score:37.1)	1	2.53807	1.98888	280	MEYKPIRKVVSGNYAAAYAALHARVQVVAAYPITPQTSIIEKIAEFIANGEADIQYIPVESEHSAMAACIGASATGARTFTATSAQGLALMHEMLHWAAGARLPIVMVDVNRAMAPPWSVWDDQTDSLSQRDTGWMQFYAENNQEVYDGVLMAYKVAETVNVPAMVVESAFILSHTYDVVEMIPQELVDEFLPPRKPLYSLANFDEPIAVGALATPNDYYEFRYKLAKAHEEAKKVIKEVGKEFGERFGRDYSQMIETGYIDDADFVFMGMGSLMGTVKEAVDLLRKEGYKVGYAKVRWFRPFPKEELVEIAESVKGIAVLDRNFSFGQEGILFTESKGALYNSSAHPLMKNYIVGLGGRDVTVKDIKAIADDMKKVIESGKVDKEVVWYHLKR
281		TRUE	PFDSM3638_08210	DUF356 domain-containing protein	14.8693	9.43279	1	37.0 (M.score:37.0)	1	7.57576	1.62638	281	MLNTIVLIRTDNFDKALTALADLVRYGGMKIRGTPRIIPPALSDWAFEQIVGEKPKKKVKAHVVAQIDLPASKAIGRIRDIHPPAHIIVIPVGSPVHKELLRLWGTFKELKGFHPPKEIKRLENIENEEDLE
282		TRUE	PFDSM3638_07140	hypothetical protein	11.1328	4.72475	1	36.9 (M.score:36.9)	1	10.101	0.191848	282	MKRALGFLSLLVIFASLLVALSPEYGIKFGVGGEDWLKYRYTDNYYIEHGIEEVGGTNIVTDIVFDYRGYDTLGEATVLFTAIAGAVALLRPWRREENE
283		TRUE	PFDSM3638_06995	AmmeMemoRadiSam system radical SAM enzyme	40.3744	7.04823	1	36.8 (M.score:36.8)	1	4.5977	0.182079	283	MRTALYWEPLEDGKVKCKLCPLNCIINPEKRGSCKVRINIDGKLYTLNYGKVSSIALDPIEKKPLFHFWPGSCAFSIGTVGCNMHCKHCQNWEISQADESFPYLQDATPESIVRLARHYECESIAYTYNEPTIWYEFVLDTAKLAKKEGLNNILVTNGYINEEPFRELAKYIDAMNIDIKAFNDKFYMKISSVPSGEPSRRTAVIAKKEFGIHVELTYLIIPTLNDNEEEIRRFARWVVEELGDDTPVHFSRFFPHYKLLNLPPTPIQTLEKAYKIAKEEGLKFVYLGNVPGHEGENTYCPRCGKLLIERWGFEILRYEIKDGKCKYCGEQIPIVGEYQRKTYRGMWW
284		TRUE	PFDSM3638_03500	cytochrome C biogenesis protein	46.3367	5.82352	1	36.6 (M.score:36.6)	1	2.07852	4.37405	284	MRRALLTFIVLLLFAGLVTGREVSYGGLKFHDVSTEEELNSLISAHEGEYFFIFYHSESCPACSYMKESVFPTEKAKQALKSLNLVAVDVYRGREITTLRYRVEDKVIVLQPDNFGYYTPKKPGEEISVGVPGTPTMVIFKVVNGTKVLKGVAVGALNPDGLEFFVKTAIGDDLQSPTESTGTQSEMAEKGASEENLNTNLSLAVLLPIFSAGIVSVFSPCVLPIIVGTLSLTFAKRSVEAIVTGMVASFALLGALVGSLGEYASRIQGALYLIGGAGFIVVGLSFISEDVRTGLERILSFSLSDRVLKKSGLIYDFALGSALGATWLGCIAPYVGFAVLTAALSGDILSGVVVMGTYGLGMGLTVYLLTSSKDLAEWVNRKFLSNKLSLGASRSAKWE…
285		TRUE	PFDSM3638_00460	fuculose phosphate aldolase	21.2824	9.75002	1	36.3 (M.score:36.3)	1	4.7619	2.46701	285	MRNIKAKLIHYSKLAHRKGLTGSFGGNMSIRVGNYVFIKGTGSVMEELTESQIAVVKLDGKVVSSVRPSSEYRLHLGVYRNRPEVRAVVHLHPPYSIVLSIFEREAPMITPEAELYLKKVPVLPFRPAGSVELAQQVSEAMKGYDAVVLERHGVVTVGRSLREAFYKAELVEEVARLWYQKFIASREKN
286		TRUE	PFDSM3638_10150	elongation factor EF-2	82.2029	6.27341	1	35.1 (M.score:35.1)	1	1.50273	0.0840125	286	MGRREEMIAKIKELMLQPERIRNIGIAAHIDHGKTTLSDNLLAGAGMISEELAGKQLVLDFDEQEQARGITINAANVSMVHNYEGKDYLINLIDTPGHVDFGGDVTRAMRAIDGVIIVVDAVEGVMPQTETVVRQALREYVKPVLFINKVDRLIRELKLTPQQMMERFSKIIMDVNRLIQRYAPEEYKKKWMVRVEDGSVAFGSAYYNWALSVPFMQRTGVKFNEIIDLTLKGDNKTLRQRAPLHVVVLDMVVRHLPSPIEAQKYRIPHLWQGDINSKIGQAMLNCDPKGKMVMVITKIIIDKHAGEVATGRVWSGTVRSGQEVYLINSKRKGRIQQVGIYMGPERINMEAVPAGNIVAVTGLRDAMAGETVAEEQIEPFEALHYVSEPVVTVAIEAKN…
287		TRUE	PFDSM3638_05995	NAD(P)/FAD-dependent oxidoreductase	39.9161	7.66111	1	34.8 (M.score:34.8)	1	2.50696	0.741176	287	MKVVIVGNGPGGFELAKQLSQTYEVTVIDKEPVPYYSKPMLSHYIAGFIPRNRLFPYSLDWYRKRGIEIRLAEEAKLIDRGRKVVITEKGEVPYDTLVLATGARAREPQIKGKEYLLTLRTIFDADRIKESIENSGEAIIIGGGFIGLELAGNLAEAGYHVKLIHRGAMFLGLDEELSNMIKDMLEETGVKFFLNSELLEANEEGVLTNSGFIEGKVKICAIGIVPNVDLARRSGIHTGRGILIDDNFRTSAKDVYAIGDCAEYSGIIAGTAKAAMEQARVLADILKGEPRRYNFKFRSTVFKFGKLQIAIIGNTKGEGKWIEDNTKVFYENGKIIGAVVFNDIRKATKLEKEILDFYS
288		TRUE	PFDSM3638_00905	ABC transporter permease	52.466	8.46391	1	34.8 (M.score:34.8)	1	2.32068	0.787982	288	MRWVDLKESLSDFWFEFRREKTGIAGLALLIFWIVVAVSAPYVTEPNIPDKWKTIWIENPKVVPPTWSSIFSGVSEAPHEVIYPEELQKYVQSTTRGLIIDIPYNMKYDVPPQDIVLMNISGKADGRLRPSLTLKIVRPDGKEITLLSGVKIKGTTTIQVARDSGVRKTVINWVKGETGIQLDPSKELQLVTSIDTMRVLFAQISPDMLEYPKALQGEYHIVFEIKTPGNTSVDLSNAKLILPGRTYGYLGTDDKGRDLFAGIVWGSRVSLTIGVATAVLTVLVGIFYGVAAAYFGGWTDEIMMRFQEFMASIPTLPILILLGTYFGGHIQLWQIVLLLTVFGWVGVARVARSMAYQIKEQTYVEAAIALGAGSGRIIFKHMMPQLLPYAFAQMALSVP…
289		TRUE	PFDSM3638_07255	cation:proton antiporter	25.6517	6.51983	1	34.6 (M.score:34.6)	1	5.10638	0.98905	289	MLKRVLAILTILVIGYWLAQGLADVPFGQDKMVVGKYYLEHVKEETGAVNAVTAVVVNYRGLDTLGEVTVLFIASTGVAALLWKKKRERTAKTEGSVVLTTGARLLFPFIALFGMYIFIHGHLTPGGGFPGGATIATAFLLMYLAFTIYEIPHRGFEVTEGLAGMGYVITGLIGLAIGGYFLFDWIWQTWGWGHENIGRLFSGGFIPIIYTLIGIKVGTELSGIVDNMLKEEVKE
290		TRUE	PFDSM3638_10375	single-stranded DNA endonuclease	53.1569	5.65733	1	34.2 (M.score:34.2)	1	2.72537	0.71968	290	MDKEGFLNKVREAVDVVKLHIELGHTIRIISHRDADGITSAAILAKALGREGASFHISIVKQVSEDLLRELKDEDYKIFIFSDLGSGSLSLIKEYLKEKTVIILDHHPPENVKLEEKHILVNPVQFGANSVRDLSGSGVTYFFARELNEKNRDLAYIAIVGAVGDMQENDGVFHGMNLDIIEDGKSLGILEVKKELRLFGRETRPLYQMLAYATNPEIPEVTGDERKAIEWLKNKGFNPEKKYWELSEEEKKKLHDFLIIHMIKHGAGKEDIDRLIGDVVISPLYPEGDPRHEAREFATLLNATGRLNLGNLGVAVCLGDEEAFRKALKMVEDYKREQIEARKWLLQNWNSEVWEGDHVYVLYVGKSIRDTLVGIAASMAINAGLADPEKPVIVFADTD…
291		TRUE	PFDSM3638_00880	radical SAM protein	34.503	6.21873	1	34.2 (M.score:34.2)	1	4.96689	0.490438	291	MKKYTWEEFAKLMGIEPQKLENKEARVLKKFVEEITWPTHCNYCEGLDLSNPNPVHHPSYELTPACNHDCIFCYSNVAVKLGRAPSPGYYGWENPKAITVSQYGEPLLSPRIIEVNRILRERFPEARLDLQTNGSLLTRELWEKLDFDLVMISLNAADKEKHKRIANADTFEQVVNALKIVGEDDSVRSVVRTIFMPGINDEDIPKIAELAASLGIDEMHLQPLTIHELNVERLKKAGLDFERAESIRELLKAAMEAKKYIDVRISGCILVQLKQMDPITLYSVRRVAREVAPLVKRSKLDI
292		TRUE	PFDSM3638_09360	peptidase M42	38.1899	5.25892	1	34.2 (M.score:34.2)	1	3.75723	0.178232	292	MVDWELMKKIIESPGVSGYEHLGIRDLVVDILKDVADEVKIDKLGNVIAHFKGSAPKVMVAAHMDKIGLMVNHIDKDGYLRVVPIGGVLPETLIAQKIRFFTEKGERYGVVGVLPPHLRREAKDQGGKIDWDSIIVDVGASSREEAEEMGFRIGTIGEFAPNFTRLSEHRFATPYLDDRICLYAMIEAARQLGEHEADIYIVASVQEEIGLRGARVASFAIDPEVGIAMDVTFAKQPNDKGKIVPELGKGPVMDVGPNINPKLRQFADEVAKKYEIPLQVEPSPRPTGTDANVMQINREGVATAVLSIPIRYMHSQVELADARDVDNTIKLAKALLEELKPMDFTP
293		TRUE	PFDSM3638_00505	ABC transporter ATP-binding protein	41.4114	6.00489	1	34.0 (M.score:34.0)	1	2.47253	0.565693	293	MVSIKLEGIVKKFGNFTALDNINLTIKDKEFMALLGPSGSGKSTLLYTIAGIYKPTAGRIYFDDRDVTELPPKDRNVGLVFQNWALYPHMTVYKNIAFPLELRKLPKEEIDKKVREVAKILHIENLLERYPWQLSGGQQQRVAIARALVKEPDVLLLDEPLSNLDALLRLEVRAELKRLQKDLDITAVYVTHDQAEALAMADRIAVIKEGKILQVGDPDEVYHKPKYKFVGGFLGNPPMNFIEAKIEDGKLVISSENILDIPPQYREIIKKLDVKEVYIGFRPHDVEIVREGKEGLVGEIYSFEPLGREQILTIFVNGNVVKVFAPEEEHFRFGEKVNIKIKSESIVLFDKKTEKALEFLVNEP
294		TRUE	PFDSM3638_07730	DUF3417 domain-containing protein	97.6437	5.82833	1	33.7 (M.score:33.7)	1	1.1919	2.39183	294	MVKVENSIKKKIEKKLPENLKKLAELAYNYWWSWDDKAMKLWQRIDEDHWREYKNPVKLLLDVPESRLKELSRDDTFLDLYELVIERFNSYLNPETTWFSTNYPKWDKPIVYLCMEYGISKSLPIYSGGLGILAGDHLKTASDLGLPLIGIGLLYKHGYFKQEIDKNGRQIEIFPEYNISEMPIRQVLNEDGSPLLIDVPMENRIVKARVFLVKVGRVDLYLLDTDVPENNEEDRKICDYLYNAEPDKRIKQEILLGIGGMRLLKALGIEPGVIHLNEGHPAFANFERIRWLMDEGLSFEEALEVVRGTSVFTTHTPVPAGHDVFPADFVREKLAKFFEGLPAEKFLDLGRRFPGDSNFNMTVLSIKTSNFVNGVSKLHAKITREMWADLWKGVPIDEI…
295		TRUE	PFDSM3638_08770	signal recognition particle protein	49.8481	9.42574	1	33.6 (M.score:33.6)	1	2.7088	1.16628	295	MVLDNLGKALANTLKKIARASSVDEALIKELVRDIQRALIQADVNVRLVLQLTREIQRRALEEKPPAGISKKEHIIKIVYEELTKFLGTEAKPIEIKEKPTILLMVGIQGSGKTTTVAKLARYFQKRGYKVGVVCSDTWRPGAYHQLRQLLDRYHIEVFGNPQEKDAIKLAKEGVDYFKSKGVDIIIVDTAGRHKEDKALIEEMKQISNVIHPHEVILVIDGTIGQQAYNQALAFKEATPIGSIIVTKLDGSAKGGGALSAVAATGAPIKFIGTGEKIDDIEPFDPPRFVSRLLGLGDIQGLLEKFKELEKEVEIKEEDIERFLRGKFTLKDMYAQLEAMRKMGPLKQILRMIPGLGYSLPDDVISIGEERLKKFKVIMDSMTEEELLNPEIINYSRIK…
296		TRUE	PFDSM3638_08880	signal recognition particle-docking proteinFtsY	35.7913	5.38517	1	33.4 (M.score:33.4)	1	3.72671	1.39398	296	MFGKLREKLKSFVKRVEEEVEKEEEEVEKKGLLDRILTVEIKEKDVDKALDELEIDLLEADVALEVVDALREKIKQKLVGKKVRIGTDKGKIIEEAVKEAVSEILETSRRIDLIEEIRKAEKPYVIMFVGFNGSGKTTTIAKLANWLKNHGFSVVIAASDTFRAGAIEQLEEHAKRIGVKVIKHSYGADPAAVAYDAIQHAKARGIDVVLIDTAGRSETNRNLMDEMKKIARVTKPNLVIFVGDALAGNAIVEQARQFNEAVKIDGIILTKLDADARGGAALSISYVIDAPILFVGVGQGYDDLRPFEKEWFLERIFGEENA
297		TRUE	PFDSM3638_01745	prefoldin subunit beta	13.3243	8.80239	1	33.3 (M.score:33.3)	1	9.40171	1.75729	297	MQNIPPQVQAMLGQLESYQQQLQLVIQQKQKVQADLNEAKKALEEIEKLTDDAVIYKTVGTLIVKTTKEKALQELKEKVETLEVRLNALNRQEQKINEKIKELTQKIQAALRPPTAG
298		TRUE	PFDSM3638_02805	carbamoyltransferase HypF	87.356	5.76125	1	33.1 (M.score:33.1)	1	1.16429	0.109059	298	MKAYRIHVQGIVQAVGFRPFVYRIAHAHNLRGYVRNLGDAGVEIVVEGREEDIEAFIKDLYKKKPPLARIDKVEREEIPLQGFDRFYIEKSSTEKKGEGDSIIPPDIAICEDCLRELFNPTDKRYMYPFIVCTNCGPRFTIIEDLPYDRENTAMREFPMCEFCRSEYEDPLNRRYHAEPVACPTCGPSYRLYTSDGNEIIGDPLRKAAKLIDKGYIVAIKGIGGIHLACDATREDVVAELRKRIFRPQKPFAIMAKDLETVRTFAYISPEEEEELTSYRRPIVALKKKEPFPLPENLAPGLHTIGVMLPYAGTHYILFHWSKTPVYVMTSANFPGMPMIKDNEEAFEKLRDVADYLLLHNRRIPNRADDSVVRFVDGRRAVIRRSRGFVPLGIEIPFEY…
299		TRUE	PFDSM3638_00120	phosphoribosyltransferase	17.5506	6.16906	1	33.1 (M.score:33.1)	1	7.18954	1.62382	299	MDKVYLTWWQVDRAIFALAEKLREYKPDVIVGIARGGLIPAVRLSHILGDIPLKVIDVKFYKGIEERGEKPVITIPIHGDLKDKKVVIVDDVSDTGKTLEVVIEEVKKLGAKEVKVACLAMKPWTSVVPDYYVFRTEKWIVFPWEEFPVIERE
300		TRUE	PFDSM3638_06500	DUF2101 domain-containing protein	27.7731	9.20635	1	32.7 (M.score:32.7)	1	3.82979	0.196665	300	MKLEEFLYLLGEKIEVGIWKIFYITKNLLLPSPSQELPRSILGRLAKRAKTPHELLSLKLQLVFLVYLIFSLLLVFMNFWKIFIVVAFFYFLYLRYLLITNREFFIDYQPYRAFYLSLSIIATISYGGFIIVREYSTSPYHYYIYLLAVLATVLVFRHWFKSKYGRDYTYGVVEEVKGDLVRVYVHDDIAANVKPGYYWLPAVPDAEPGRIVKILVEEQTLRGAKPVRIIEVYME
301		TRUE	PFDSM3638_07240	NADH-quinone oxidoreductase subunit M	67.4721	8.92138	1	32.6 (M.score:32.6)	1	1.77994	2.84463	301	MNELPIILLSPLIGGALAWLIRVKGIREAIGVVSSAIPLYFLIKLYPALEGEPIRYSLNVGGFELTLALSHISWIFAMIAAVVGLSAVLGLVSTAKDSNEWLFALMSLAGALGVFLANDFVVFFLSWEIMTFASFMMVFKYNRHASLKYFVLSIAGAYAMLLAIGIIYAKTGSLSFPEISAIFRQDAMMGMMGGGGVFTKTETLLIYALFLVAFGVKAGMFPLHVWAPDAYSETNQSYTAMFSGVLSKTGVYGFFLLYLLMYGKLAITLGNVRSAPTFGYIIAFLGGLTIMVGGILAALQEDIRKLFAYSSISQIGYILIGLGIGTPLGIAAATYHAISHALFKGLFFLIVATIIYRTGKTEFKDYGGLAEKMPITFAMAFVAILSLAGIPPMAGFASK…
302		TRUE	PFDSM3638_02495	class I SAM-dependent methyltransferase familyprotein	32.4067	9.49154	1	32.5 (M.score:32.5)	1	3.59712	0.406235	302	MRTQVIKPRIREILSKELPEELIKLLPKRWVKIGDVLLLPLRPELEPYKYKIAKAYAEVLEVKTVLRKGHIYGETRKPDYEILYGSDTITIHVENGIKYKLDVARIMFSPANVKERVRMAKVAKPNELVVDMFAGIGHLSLPIAVYGKARVIAIEKDPYTFKFLVENIHLNKVEDRMSAYNMDNRDFPGVDIADRILMGYVVRTHEFIPKALSIAKDEAIIHYHNTVPERLMPKEPFETFKRIAKEHGYEVEKLNELRIKRYAPGVWHVVLDLRVFKR
303		TRUE	PFDSM3638_07305	fucose isomerase	54.2721	5.24087	1	32.5 (M.score:32.5)	1	2.07039	1.83625	303	MIGLVSFTDPRKTALSHERESAIKEKHEKLLKELSEEFEILDINAELGKYSEEIFGINSVEEAIEAGRIAKSKGVSGVILGLWHWTESNLVTYFIKEANVPILLYSDGDPNWAGATCVTSVGASLWESSVNEYAIRHSRVIGDVELVKAWARASEAIKALSERALLLFGGTYTLGMEHLMDDLPRLKKFVGDFIILDQYVVIKEGESIEDEKVEEFYNWLMKNTNVKFDNKMLTPEVLKKQIRLYLGAKKIVEERKERVSGISIKCQPELSEVYGVTACTIPAFFPFNQDAFGEKPIIPATCEGDIKGTISSALLYYLSGKPPLFGDIKYVDDEIVIIANCGASSLYYARLSDDAYENLRAVTIQGQCQGKSGGALTYRTPPAEFTVARLIRRNGKYYL…
304		TRUE	PFDSM3638_06275	hypothetical protein	12.4796	7.8914	1	32.5 (M.score:32.5)	1	13.0841	0.960754	304	MNPENKMMLMAYGIFAIAGIISGILGAYAPLGWIIGWIIYILAPKLLLNLVPDLPEELRNERVILRKTFWSFFFFWLYFTGLTYTLITNYEPVAYYEKALYYNITKG
305		TRUE	PFDSM3638_01715	hypothetical protein	33.8378	6.49099	1	32.0 (M.score:32.0)	1	3.31126	15.8249	305	MATTNEVKTYVCDIKTILFIGSLLALLSYLPGTGRVLSIIGGIVYLYGLYRWKELVDERPFKLALLIFVISIFQVVAVLILLRAERIALSITSFSKLIFVYTILNYPFVALIAILRRIILENFYEVTGEENFLTSRELLLYAILLYPVIVGSIIGIVANVYELLGYKNMPEAVTPVRGRKIEINKRETIALLGASFLISGLLIYALVPKYDFEIEKGNVVFYGEISGDFIDGIIIYKEPCPGSKICIEKVEVDGEIVYSAPSYEKVNNKQVVRISIPKSAEKIRVLLAKEGEVIIEVPTKES
306		TRUE	PFDSM3638_06725	S-methyl-5-thioribose-1-phosphate isomerase	39.6317	5.9141	1	31.9 (M.score:31.9)	1	2.52809	0.164169	306	MEIKYRPEELTKLPRSVEYREGKVYMINQRLLPREFKVEEFTTVEAVAEAIKNMTVRGAPAIGAAAAFGLALYAETSKAKTKDEFFDGFYRAYETLKNTRPTAVNLFWALNRIKKLVEEHREDSLDEIKRLIVEEAQKIADEDVEANLRMGHYGAEVLPEGNILTHCNAGSLATVHLGTVGAVVRVMHKEGTLKLLWLDETRPVLQGARLSAWEYSYDGLNVKLIADNAAAFVMQQGKVDAIIVGADRIVANGDFANKIGTYMLAVLAKEHGIPFFTVAPLSSIDMSLSSGKEIPIEERSPEEVLTCGGCRIAPDVPVYNPAFDVTPHKYLTGIITDRGVVWPPFKRNLKKLFETL
307		TRUE	PFDSM3638_06380	50S ribosomal protein L16	20.9221	10.3022	1	31.7 (M.score:31.7)	1	4.41989	1.37323	307	MALRPAKIDRYVDKPAYTRREYIRGAPGPKITIFDMGNPAGDFEFEVSLHTAEPVQIRQNALEAARQQVNRYLQKNVGRSNYHFKIRVYPFQVLRENPMATGRKADRYGNGMRRPFGKPIGLAARLKKDQKILSIRVNRQHLKFAIEGARRAAMKFPCKCYYRIYDKEGNDVTTKILSQSL
308		TRUE	PFDSM3638_02840	hypothetical protein	17.146	9.72065	1	31.7 (M.score:31.7)	1	7.74648	1.88131	308	MGMKYLIKLKYIKPAQLAVNREQKLAEFYPIFEDGTLGRVEAKARVFLPEYSDFAKGLGFEVKKRRMITEDDYAYLRAMVYGVVMGVLRNPGDWRRLEERVLEMEPIELRYWASKFRNAYWKYKNMRKLMFLARRFMEVEMI
309		TRUE	PFDSM3638_07895	hypothetical protein	24.1546	9.69416	1	31.6 (M.score:31.6)	1	6.79612	1.1944	309	MYFDHFPTFGGYIFSMVLYYTLIPAVLLVTLRIKWNYIVRRYWRSVLKAFIIAIFISSLITSLLQFKLTNDYLYVYSLTRTGVCLTSSCLISEMERNRDYHFNITAIKSYGMPRAGLMMAFRLVDRKYNPSKGRFESVNSVVIIRSLAPIPAVEVWDYKVDPKDSHRIIGLRKFYIYYPYSPATFLTKAYDFEFTMFLWGMRGGAA
310		TRUE	PFDSM3638_02325	ATP-dependent protease LonB	115.242	5.79404	1	31.5 (M.score:31.5)	1	0.77821	0.756945	310	MEEERLDLGIEFETTEEIPVPERLIDQVIGQDHAVEVIKTAAKQRRHVLLIGEPGTGKSMLGQAMAELLPTENLEDILVFPNPEDENMPRIKTVPACQGRKIVEEYRKRAREQESIKTYLLFFVFLVVGMAVLMSKGDPNTLLLGVFVILVALMAVANMRIRTQAMVPKLLVDNCGRKKAPFVDATGAHAGALLGDVRHDPFQCFSGEEVILIEKDGEKKVFKLREFVDGLLKEASGEGMDGSIRVVYKDLQGENIKILTKDGLVKLLYVNRREGKQKLRKIVNLEKDYWLALTPEHKVYTIKGLKEAGEITKDDEIIRVPLTILDGFDVAEKSIREELERLSLLPLNSEDSRLEKIAGIMGALFGSGGIDENLNTLSFVSSEKKTIEQFVKALSELFG…
311		TRUE	PFDSM3638_03395	tRNA (guanine-N2)-dimethyltransferase	44.3992	9.62142	1	31.3 (M.score:31.3)	1	3.66492	1.25094	311	MGRFKKVPSSLCPMKKPGDVLREILQEKGIKSVGTLSRKWPSGRDIYQELALLLLEGDGAIVELREETAESWDLNGKKVGPSKYAYVRPCFVEKFKVIVDGSEIAKRLPDYPWIIVDLTFWNRHIPKEKDKVALQLRETYAVVRRMYYPRRFAITWVNEEFKKKNKVPLEKVVSYEGSTADFLREKGINRVVLLDPNAEEVLSREDLQERAFIIGGIVDMKGDKKGTTAKIGEVLEKEGIDVLRRKIVLRGDIVGVPDRINHIAEILLRMLYGEDMEKAILAVQAPTHARWRLRKEIPKRKIRYLIDGKLYLVVEKELYDELKQWLNIRWEDFVKVLRETGMVALERRRIHHLNKISVFRFDKSGGKRVILLKRAALLCYNC
312		TRUE	PFDSM3638_01765	50S ribosomal protein L31e	11.0513	10.0971	1	31.1 (M.score:31.1)	1	13.6842	0.628122	312	MAIKAGEEVIFTVPIKKIKKIVPRWKRAPRAVKFVREFVARHAKAQEVIIDPKVNEKIWERGIEKPPSKLRVKVKVEEEKREGEETVRIAYVTLA
313		TRUE	PFDSM3638_03450	hydroxylamine reductase	51.0281	5.64504	1	31.0 (M.score:31.0)	1	2.19298	3.77967	313	MAIRVPEAFDMLCNQCSMSLAGGCTIRGVCGKDPDLNSLQEALLYGIKGTSAYYYHALEMGYDDPEIGHFLSKALYSTLTNVNFDKNRFLQLILENGRVHLEAMKLLDKAYVETFGRPEPVEVPTGTAEGHGILVTGHSYKALYELLKQIKERGLEEEIKVYTHAEMFPAHAYPELRKFKALYGNWGGSWVQQRKEFAEFPGVIVGTSNCVQQPTKAYKDRIFTVGIAGLEGVPHIEDYNFEPVIERALETPRMKAYDGGKLLTGFHHTNVLAMKDKLIELINEGKIRHIFVVGGCDTPHKGMGYYERLTELIPKDAIILSAACGKFRYNARNYGTIEGIPRFLDFGQCNNVYSIIEIAIALANELGTDVNSLPVSIVLSWMEQKAVAILYSLLYLGIK…
314		TRUE	PFDSM3638_03945	asparagine synthase	63.0198	6.82595	1	30.8 (M.score:30.8)	1	3.54478	1.31652	314	MKIDIKFRHNYGYLWYEKQGIYVKGYVIHESTLYQKEDLVKLLLEHLEKGVKLENILTTFYGIFSIAIKTDDKIHLISDTTRTFPMFYAVANDEILISDDTFFIKKKIDGQYNKDLKTEFLRCGYVTGPETLINGVYQVQAGEIVVISEDGQIMRKFYHDYTVTQDELLKDSSDALKKEFLKILDKAIKRLILMANGDTIVIPLSGGYDSRAIATMLKKNGYENVILYTYGKPDSTEVRVAREVAKNLEFEWIFVEQNEDIVDPDYPERDFFLEFYKYAFNHVSTIHLQDFFVFKHLHDNSVIPKNSIIVPGHSGDFLGGSHLRKLPIPKSKRDVFNTILIKHYIVNEHIKLSPYVVKKINEYLNSFSEHTLPYSLDDNWNMKERQAKFIVNSNRTYEF…
315		TRUE	PFDSM3638_05235	rubrerythrin family protein	23.2657	5.11622	1	30.8 (M.score:30.8)	1	6	0.806298	315	MKLIEIIKELKNMEEEAFKSYLELIKNLRDPEDADLKRITLRLAVDKIFHRELMEAIERAYEKSVKLIRDNIEPYYPELEPIRESLLELDQGLALIPGVPALLLPLDLGKLGRRIPTEDILAEIIKSLPEPSIIPEEKREEIKGNLEKVTSIEEEMIDKYTKLHEKAFHPVIKDLTSSIIQNENQHKALLLKLKERIESE
316		TRUE	PFDSM3638_09880	ribonucleoside-triphosphate reductase	14.6458	7.79719	1	30.6 (M.score:30.6)	1	6.34921	0.149826	316	MKINDIIRENIEKDGLWLVITFKTPYGPRDTLEILERAIRESGWDVTFSANWWTADIPYGLARVDAKKNGKEKIVLGKWVLGKSCKIIKVENLDLEKGKEEFFRMVDSIASTLIHDPVIRTMREQY
317		TRUE	PFDSM3638_07275	Na+/H+ antiporter subunit E	19.1041	6.05894	1	30.4 (M.score:30.4)	1	10.119	2.0458	317	MEEASSISRYLYTFIVLFIIWLFLTASLDPQELTIGALFSAIAALFTYEIFTTRGLANLHPKRVLYFIAYIPYFLWAMIMANLDVAYRVLHPKRPINPGIVECKTTLTNNVGKMALANSITLTPGTITLDVDGDKYFIHWIDVKDSSVEGASEHITKPFEKFLRVIFE
318		TRUE	PFDSM3638_01475	glycosyltransferase family 4 protein	37.4794	9.54153	1	30.4 (M.score:30.4)	1	3.27381	9.44819	318	MRILLVGHYPPHKGGVARHVKQLKECLEKRHEVYVLTYGTVAVEEENVYSVKVPNIFGIRGTSFALLASKKIVKLHEKYNFDLVHAHYVGTTSFAGVLAKRKTGVPLVITAHGSDLEFMSRLPLGGYFVKTSIMEADYVIAVSHYLAKKALELGASRISVIPNWTELSGESERKYILFLGRVASYKGIEDFIELAKRFPGEEFVVAGEGPLLKKLRAKSPPNVKFLGYVPAEDVLKKAKVLVLPSKREGFGLVVIEANSFKVPVLGRNVGGIRELIRFSKNGYLFEDIEDAITYLKTLLVPKTNVKLGSIGKRISKGHSQEKMCERVEEIYREVIS
319		TRUE	PFDSM3638_08790	adenine phosphoribosyltransferase	26.7235	6.66637	1	30.4 (M.score:30.4)	1	3.79747	0.717765	319	MNQLEAVREKLRVIRMLRVLKKTYTYEDLSEITGLPVTVLNRYVKGKVLPSVERARELFEKLSPYLNLEEEVKKRLRFDSHGFFDSMSVLSDTNLLALISEDVALKYMKVGVEKILTAATDGIPLAVQIANELGVDVVYAKKKKEVGVERFYEVNYIPSASGSITTLYLPTWALKKGERVLIVDDVVRSGETQRALVELCRQAGAIPVGMFFLISVGDIVERLKEEYNIPVEALVNL
320		TRUE	PFDSM3638_08135	septum site-determining protein MinD	27.4402	5.72334	1	30.1 (M.score:30.1)	1	4.6332	0.887598	320	MEGRSIVFASGKGGTGKTTTVANIGVALAQFGKEVILIDADITMANLSLILGMEDIPITLHDVLAGEAELKDAIYEGPAGVKVIPGGLSLEKVKKARPERLRELIKEISQMGDFILIDAPAGLELTSVTALLIGKELIIVTNPEISAITDSLKTKLVAEKLGTLPLGAILNRVTSEKTELSKEEIEAILEVPVIGIVPEDPEVKRASAYGVPLVIKNPTSPAAIAYKQIAAKLAGIKWTPPEPESPVKRIFKALFGGKR
321		FALSE	PFDSM3638_09090	50S ribosomal protein L32e	15.5249	11.1876	1	29.9 (M.score:29.9)	1	12.3077	1.02947	321	MDEKEFKRLLRVRARLKRKKPRFLRQEWWRYPKFKNDPKWRRPKGIDSKMRLKLKGKPRSPSIGWSSPKLVRGLHPSGYEEVLVHNVKELEALDPKRQAARIAHTVGKKKRIEIIKRAEELGIKVLNPRV
322		FALSE	PFDSM3638_06025	serine--tRNA ligase	53.1669	6.64458	1	29.9 (M.score:29.9)	1	3.07692	1.5136	322	MLDINLIRNNPELVKNDLKKRGELDKIAWIDEILRLDEEWRKKLKEINRLRHERNKIAIEIGKRKKAGEPVEDLLAKSKEIVKRIEELEKEVEELRKRIDYYLWRLPNITHPSVPVGKDENDNVPIRFWGKAKVWKGHLESFLEQSQGKMEYEVLEWRPKLHVDLLEILGGADFARAAKVSGSRFYYLLNEIVILDLALIRFALDRLIEKGFTPVIPPYMVRRFVEEGSTTFEDFEDVIYKVEGEDLYLIPTAEHPLAGMHANEILDGKDLPLLYVAFSPCFRKEAGTAGKDTKGIFRVHQFHKVEQFVYSRPEESWEWHERLVRNAEELFQELEIPYRVVNICTGDLGYVAAKKYDIEAWMPGQGRFREVVSASNCTDWQARRLNIRFRDRTDEKPRY…
323		FALSE	PFDSM3638_05630	type I-B CRISPR-associated protein Cas8b1/Cst1	51.4549	6.59983	1	29.7 (M.score:29.7)	1	3.37079	1.21525	323	MFSWTGHPFVDGGLAALLLYSEKTRPEELTQEDIEKAIKFASELYARKDWSSSYLHALLFPNSGLLMANPSMAKKRTPENIAKNLESLLNEKEDPNAPICEICGRRHSRSKPVYRSEFPLIGSGGVPNYFPSGKEGANICSHCLFLVQFLPLILYRLRRLLLIHTYPPELMLELHREALKDVRLTKLVSSGRGYQRPENFLFTLLTEVTIKTEREELWENASITLYYFTNPNRERPKMMIIHVPSSVTRFVAHAARHDLSGWKRIVAMGWKKGSDEKSSPNEVYLKLLNGESILPYFINVAKRRTNASWDLLSFYCTEVLGLDEKALEFIKEVGDRIVETLKELPDNKLSARVRELERAEKLYQFEAFFVNLEKLRQRLGLKDPLLTFDEFARVLTIYG…
324		FALSE	PFDSM3638_06070	ABC transporter ATP-binding protein	36.1428	6.1509	2	29.5 (M.score:29.5)	1	3.48101	1.37276	324	MLELENVTKTFTSGLFGGYEIRAVDGVSFKVEEGEIVSLIGESGSGKTTIGKLILRLIKPTSGRILFKGEDIWSFDKERLRRYYYKNVQAVFQDPFASFNPLHKVDRVFDLVFKNFLGNVGEEEKKEMIKRSLESVGLNPSEVLGKYPHQLSGGQLQRILIARALLVEPSLLIADEAVSMLDASTRIDILNLLGEFRDRVGTSVIFITHDLALGYYISDKVVIMYRGRIVEWGDAEKIFNNPLHPYTRMLLESVPDLNVKWEFKGIEPEREEEGIYEIQGCRYAPRCPYAREECYKKPPQTTQPEKNHHVACYLYK
325		FALSE	PFDSM3638_06630	cytochrome-c3 hydrogenase subunit gamma	32.9239	8.43645	1	29.5 (M.score:29.5)	1	2.77778	1.36684	325	MNPYRSYDARIIEVKELTSREKLFSLKFLDNEIEENFTFKPGQFVIVDIRGFGEFPISLCSSPTRRPIQLCIRRVGRMTKFIHKMNEGDIIGIRGPYGNGFPMDLMEGSNLILIAGGLGMAPLRSVLWYAIDSGKYEKIYLFYGTKSYEDILFRDEIIHLLKHGEKLNCHVKLAYEVETPSCIYLERGFSEKVCKGVVTDLFRGEEFDVENSYALICGPPVMYKYVIRELLDRGLSPGRIYMTLERRMRCGVGKCGHCIVGTSVSIKYICKDGPVFTYWDALSTRGLI
326		FALSE	PFDSM3638_05195	orotate phosphoribosyltransferase	20.086	5.44776	1	29.3 (M.score:29.3)	1	8.79121	0.327501	326	MKEELIRMILEEECIKFGHFILTSGKESSYYIDIKKLITNPKALRLIARLIKEKAEEEGIQFDKVAGPELGAVPIATALALETDRPLLIVRKKKKEHGTGRQIEGEVKEGDRVLLVEDVTTTGGSVLRAAKILKEAGAEITGIFVVVDREEGAKEAIEKEGFKLYPLVLVHELFEAAGVSSE
327		FALSE	PFDSM3638_03055	hypothetical protein	13.6565	8.89062	1	29.2 (M.score:29.2)	1	5.6	0.370769	327	MEIDKGLAKFGDSLINFLYSLALTEFLGKPTGDRVPNASLAIALDLTGLSKNLRRVDKHAKGDYAEALIAKAWLMGLISEREAVEIIKKNLTPEVLDFSKKKEAIGRALAPLLVIISERLTSSQV
328		FALSE	PFDSM3638_09810	methylmalonyl-CoA epimerase	14.8352	5.88174	1	29.2 (M.score:29.2)	1	11.2782	1.27753	328	MFKKIDHVGIAVKNLEEAIKIWEGLGLKVEEIEEVPDQKVRVAVIKIGESRIELLEATSEDSPIAKFIEKRGEGIHHIALGVEGIEKKLEELKEKGYRLIDEKPRIGAGGAKIAFIHPKSVTGVLLELCERKE
329		FALSE	PFDSM3638_04285	ferrous iron transport protein B	74.0564	6.71925	1	29.1 (M.score:29.1)	1	1.65913	2.08237	329	MLKTVALVGNPNVGKTTIFNALTGLRQHVGNWPGVTVEKKEGIMEYREKEFLVVDLPGIYSLTAHSIDELIARNFILDGNADVIVDIVDSTCLMRNLFLTLELFEMEVKNIILVLNKFDLLKKKGAKIDIKKMRKELGVPVIPTNAKKGEGVEELKRMIALMAEGKVTTNPIIPRYDEDIEREIKHISELLRGTPLAEKYPIRWLALKLLQRDEEVIKLVLKYLGQEKMDEILKHISELEEKYKRPLDIVIASQKYEFLEQLLRKFVVHEPEVKENLANQLDRLLTHPVYGMISLLITFYLVFKFVFTFGFPLQELLDTAFSQLGESIAPYIGNEALRGLIVDGIIGGVGTVVSFFPLVFLLFVAMSILEDVGYLARIAAMMERFMRIFRLPGKAVIPM…
330		FALSE	PFDSM3638_00045	class II glutamine amidotransferase	29.7591	5.28402	1	28.8 (M.score:28.8)	1	3.80228	0.012948	330	MCRILLAVGEGQRIVPWIEAFVKASENDPYKEARGKGRSHKDGWGYVLITEDYVKHYKSRRPVFEDEEVDELKGSISNFSVLMAHSRAASQGSVETFNAQPFSFGSPHGYQLYFMHNGDLNKSMLLEALKLPAEKFLNVSDSYVAGMYASLFITSQEDEEIVKAISALKEVVNTSLNVGMILASPGKLKVVGVAYMREEFLERKAERDYMRLISFPDSDLFVLASSTLELYTYFPVDDVPNATLFALDVNLKEKEFEVRKYSF
331		FALSE	PFDSM3638_09965	TIGR00296 family protein	24.0746	4.9732	1	28.8 (M.score:28.8)	1	5.71429	2.02222	331	MYRIKDEWGEFLVRLARRAIEEYLRTGREIEPPKDIPPELWEKMGVFVTLNRHNVPPQAALRGCIGFPLPIYPLVKATIKAAIYAAVDDPRFPPVKLEEMNNIVVEVSVLTPPELIEGPPEERPKKIKVGRDGLIVEKGIYTGLLLPQVAVEWGWDEEEFLAETCWKAGLPPDCWLDEDTKVYKFTAEIFEEEYPRGPVKRKPLIPQSQD
332		FALSE	PFDSM3638_04430	DUF4855 domain-containing protein	34.8115	4.86393	1	28.8 (M.score:28.8)	1	2.99003	1.21839	332	MTLDGRSPGTYYDEVHLFRERGFDRVVFLGGEGRGINYTGNGFEDARYLALWIRTHITSIDYYITIPFSYGSGGLRDNPANGFKNSYWREWIDGVLGVDDDNRLGFYWSYESCLQTTSYDEAHVTEEFIQEMSDYIHSHGLELIWIPTIGNRTMEQVKTFCAIPTLAKYFDNVFVQPHYYQTTKLSDGSDYTFQELVRRVEWMKDEGLSIEMEADNSIIGEKSNCAYCKSVQGWWQNDSFHEKVGCDVEPTPETEEKCIDRACDYYKAIMKVSTSAFSTRAYYFGTDFKVVDKVKSKCPGW
333		FALSE	PFDSM3638_10135	DNA-directed RNA polymerase subunit P	5.75313	9.96653	1	28.5 (M.score:28.5)	1	14.2857	1.21013	333	MVEAVYRCFKCGREVKLDLSITRDLRCPYCGSKILYKPRPKVPRRVKAI
334		FALSE	PFDSM3638_01275	cation:proton antiporter	40.9108	9.04133	1	28.5 (M.score:28.5)	1	2.13333	20.0987	334	MEVLLLLSLMLAVAKIMGYIFERLGQPAVLGQIFGGLLLGLFIETNPVISEFANLGVLLLLFIAGLESELEEFKKVGKRSVIVAVFGVVVAFLFGFLVALPFTSFERAIIYGALMTPTSVSITVKVLMEMRKLNTIEGTTILAAAVVDDILGIIVLTFAISIARRVSIEYLKVMEVLVSVSALIFFFLYFGPRLAETFFRRLRIIDLPEVETAFAIVFLVLFSYLAEHLNLASILGAYLVGLAIGQTSQKKVILDHVNILGYSLFIPVFFVEVGMKMKAHHLLHVSSFAILYTLMAIVSKIVGCGIGAKLSGFNWRSSLKIGVGMIPRMGVELAMLSIAISAGVMDLASLTVIVVMVFVTTLITPPLLKVVYMKT
335		FALSE	PFDSM3638_10395	aminopeptidase	65.4942	8.48356	1	28.3 (M.score:28.3)	1	2.1164	8.58946	335	MKMRRIFITLICIGIILFFTFKNVTIHDNNNLENFQIIDGKDIPKSNASFHGVTYLTTHNFSKLEVRSYIELTINPSSQKSLEVDGKKILTVKNVRESDTSRISLIFPKRVVIGNITAKGCFIKNVSIVTMPQANILVLVLKIPKDKIGNITIEYHAEVMRFEPFVSYIEMRESWSIFRTTYDGNELVLSSMWLLRELETFESYESQIRLKVPKGWEGVVIDEKGEGFWEVIYKGSTREGNILVYSSKNSRDPLIIVGNFSLIRKNLSGITINVYQVGRKREDVVYVVSKIVRSYSRILGGYPYSSLKIFYLESLNTKAGFEFPQGVILIHPKRNETLLLAHEIAHSWFGDYASFGRMDETLANYLAIMSMNSYEVLNFVEHSPLINSTYTLAQVYTED…
336		FALSE	PFDSM3638_07970	DNA topoisomerase VI subunit B	64.3893	8.83208	1	28.2 (M.score:28.2)	1	2.11268	1.72676	336	MAEARDLFKEFKVQSVSEFFRRNAAMLGYTGSIRSLTTVIHEAVTNSLDACEEAGILPYVRVEIEELGKEHYKVIVEDNGPGIPEDYIPHVFGKMLAGTKAHRNIQSRGQQGIGISGAVMFAQITSGKATRVITSTGDDEIVEAWVKIDVQKNEGKIVKKIKHPNPKRWRGTRIELEVKNVKYVRSKQGVYWYLKLTAIANPHAHIELVEPDGKLIVFPRSSEDIPEPPVEMKPHPKGVMTDDVYTMAHRSKRSTVRRFLVSEFSRISDKKVDELVLYIAALRLINREVTDQNLKSQLIERLANGEVEKVLKSFGRKWKKVVEEVEKIMEKPPEKLTWHEAEEIVEAFKLMKFLAPPTYGLRPIGEENIEKGLSSILRPEFVTAVTRPPKVYSGGIPFQ…
337		FALSE	PFDSM3638_08215	DUF402 domain-containing protein	19.4231	4.95931	1	28.1 (M.score:28.1)	1	6.66667	2.09219	337	MRKIRLVYRRFPNRVIMREDEVIEDFGDVIVAKSEFTGMLAPLRVNGVEVINNGYKMVYFAFIGRDFDVLKIYDPSGNFKGLYVDVLDYTRREGNTVEILDLFLDIFIFPEGEYYLLDEDELEMAFNYGIISREKLLKAYDTAERIIGQIKRGKFPPKIVWEYSL
338		FALSE	PFDSM3638_03190	CRISPR-associated endonuclease Cas3''	27.0593	8.31469	1	27.5 (M.score:27.5)	1	4.64135	0.651273	338	MSCKAFQGQTLREHIEAMLAAWEIVKNKYIPSIIRVMKTVGVKFTEEDADKFMKTLIILHDVGKCSEVYQKHLSNNEPLRGFRHELVSAYYAYNILKDMFKDETIAFIGALVVMMHHEPILMGQIRSLDKEELTPEVVLDKLRTFNGVMEGTESFIKSMIKEKLGVIPKVPSPTQEDVLREVIRLSVLARHRPDSGKLRMVVGALLIPLVLCDYKGAKEREGESPKFAEVLRVEMMK
339		FALSE	PFDSM3638_01510	signal peptidase I	17.2613	6.73206	1	27.5 (M.score:27.5)	1	4.54545	0.613065	339	MEKAVKEILSTVLVFLLTFSIYYGMRIALHTDTPLVVVISWSMKPVFYRGDVVLLKGVSPEEIKAGDVVVYENPLYKYPIIHRVREIKTISIEGREELCFVTWGDNNPVPDVYPTPYGMLDCVPGEAIKAKALVVFPRIGIISIKVREFLGIGG
340		FALSE	PFDSM3638_06075	transcription elongation factor NusA	18.2059	5.40333	1	27.4 (M.score:27.4)	1	10.303	0.0742032	340	MKAPICEVCLKTEDILCPADEKKLEEGIITELDVKISRMLYKLLGDADVEFKKAVEAGDLIVLIVGEGDVPIVIGKGGKNIKYLTRELGKRVRVIESTDDVKKLAVDLLYPAGVFGVNVVYKPDGGQYYKVLVFSRDKSKLPEKSEVLESILTQITGVETKISFI
341		FALSE	PFDSM3638_07120	cation:proton antiporter	18.7239	6.59097	1	27.4 (M.score:27.4)	1	16.7665	0.48922	341	MSFITAFIWAYFLWLVLTAGSKGMLWSTQELIAGLIFASIVGYSTRNIIGEKASRFLNPVKWILFVAYAPVLFWGMVKANLDVAYRVITGKIRPGIVRVPVELENDAQYTILSNSITLTPGTLTVEACPEEKALYVHWINIPEGLEWPENSEPVSGPFEKWARRLGA
342		FALSE	PFDSM3638_04920	ATP:cob(I)alamin adenosyltransferase	19.7787	8.8512	1	27.3 (M.score:27.3)	1	5.81395	0.700101	342	MRVTTKIGDKGTTRLYTGDEVWKDSPIIEANGTLDELTSFLGEARHYVDKEFQQIIDKIQEDLYKIMGEIGSKGKIQGISKEDVEWIESLIKTYVEKIEIRSFVLPGSTLSSAKLDICRTIARRAERRLATVLREYGLGKLSLIYVNRLSDLLYLMARYIEIKEGKLREVKR
343		FALSE	PFDSM3638_00715	asparagine--tRNA ligase	50.0821	5.42693	1	27.2 (M.score:27.2)	1	4.83871	0.814136	343	MIEKVYCSEVKPELEGKKVKLAGWVYSNMKVGKKIFLWIRDSTGIVQTVIAKNVVGEEVFEKAKKLGRESSVIVEGIVKADERAPGGAEVRVEKLEVIQAVSEFPIPENPEQASPELLLDYRHLHIRTPKASAIMKVKETLIMAAREWLLKDGWHEVFPPILVTGAVEGGATLFKLKYFDKYAYLSQSAQLYLEAAIFGLEKVWSLTPSFRAEKSRTRRHLTEFWHLELEAAWMDLWDIMKVEEELVSYMVQRTLELRKKEIEMFRDDLTTLKNTEPPFPRISYDEAIDILQSKGINVQWGDDLGADEERVLTEEFDRPFFVYGYPKQIKAFYMKEDPNDPRKVLAADMLAPEGYGEIIGGSQREDDYEKLLNRILEEGMDPKDYEWYLDLRKYGSVPH…
344		FALSE	PFDSM3638_08830	hypothetical protein	12.4556	9.00191	1	27.0 (M.score:27.0)	1	8.77193	1.47	344	MVNIMDEIIVVTTPTIPGYKIIEVKGIARGGIVMATHLGRDILALLRNIKGGEVKEYTQMMAEAREEALRRMIEHAKKLGANAVVNFRFATSNVGGGMAEVYAYGTAVVVEREK
345		FALSE	PFDSM3638_06640	hydrogenase	46.151	5.04957	1	26.9 (M.score:26.9)	1	3.64078	3.44539	345	MIIELDEFTRVEGNGKAEIVIENGEVKDARVKIVEGPRFFEILTLGRDYWDVPDLEARICAICYIAHSVASVRAIEKALGIDVPESVEKLRELALWGEIIESHALHLYLLALPDVFGYPDAISMIPRHGELVKEGLTIKAFGNAIRELIGGREIHGINIKPGGFGRYPSEEELEKIAEHSKSLIKFARRIVGIFASQEAGGAVGEVLMATSDYLWGDELIINGERVQYYEVDEVPVGYSFAKHSYYKGNPVFVGALPRLLLKGESIEGEAARMLEEYRDKLESKYVIYNNLAQAIELLYALERVPQLVEEILSEGIERGNGEISQESGEGVGYVEAPRGVLVHHYRIENGKVVWSNTITPTAFNQRLMELSLLEEAKRLYGSESEENMKKRLEVIVRAF…
346		FALSE	PFDSM3638_08095	CBS domain-containing protein	17.9788	8.70904	1	26.8 (M.score:26.8)	1	7.54717	0.508853	346	MDLERALNAFHSMKVNQLTPPCSQMPIVEEDSPIIDVLKLLRTRHHVWVVNNRKDMKLVGIIRYLDIIDIFLPPKGARLGAVSSVFKSILSGAEKAGDIMERNFLTINEDATVLEALEKMKRYKIQILALIDEEGKLKGEISLRILINEFLRLIRVGGG
347		FALSE	PFDSM3638_09155	50S ribosomal protein L22	17.6326	10.4593	1	26.7 (M.score:26.7)	1	7.09677	0.366402	347	MAKRFGYSFQNFDPKRMARASARDLRISPKLAVEVCRELRGMMLNDALRYLDDVIALKRPVPLKRYNDSQGHKPGKGFGPGRYPVKVAKAIKKVLLNVKNNAVQKGLDPDKLKIIHIAAHKGPVLRGWYPRAFGRATPFNEQTTHIEVVVEEIRR
348		FALSE	PFDSM3638_02485	hypothetical protein	12.1005	8.29877	1	26.7 (M.score:26.7)	1	16.1905	1.27287	348	MITDEEIRKVIAPLLLSGAKMLDKHCPKCGSPLFEKDGKVFCPVCEYREKQKKEKVKGVEEKLTEKLTQLANSLPEDIDELEKYLKIMGKIIEVLEKYRRLEGGR
349		FALSE	PFDSM3638_00810	preprotein translocase subunit SecF	32.3764	5.04198	1	26.6 (M.score:26.6)	1	6.41892	2.16471	349	MPEVDNVIKEKLKLLVEMDPKKMIIYPLIVFGIAIIIIIANYVMTGSFVKEGIELRGGSVITLQGVNVSPDEIAKSIKEKTGIDVTVEKFSGVGGSGVRVYVSAGDDVNLVREALKEMFPDVEPQTVVIGPTFGEIVREQGIKAIVYAFIGMAIVVFLFFRVPVPSMTVVFSAFSDMIIAIALMNIFGIELSQATIAALLMLIGYSVDSNILLTTRLLRRKEFTVEEAYYSSLKTGFTMSTTTLGALASLWIFSTAQVIDDIASVLIFGLLADFMNTWILNAGVLRLYIAKREGKE
350		FALSE	PFDSM3638_05740	ATP-binding protein	31.9887	5.29577	1	26.6 (M.score:26.6)	1	6.44068	1.16081	350	MTIKAPTLNVPGLGVDPLTQRIKEKEKKWKYKIAVLSGKGGVGKSTVAVNLTAALAKMGYFVGILDADIHGPNVAKMFGIGNTDIYAEKFEDGHFEMIPPTVDFMGQVTPIKVMSMGMMVPEDQPIIWRGSLVTKAIKQLLGDVMWGELDFMIIDFPPGTGDEILTVVQSIQLDAAIVVTTPQEVALLDTGKAVNMMKKMEVPYIAVIENMSYLICPHCGNKIDIFGEGGGEKLAEKEGVDFLGKVPIDLKAREASDLGIPIVLYGDTPAAKAFMEIAEKLVNKLKEIKGDGREK
351		FALSE	PFDSM3638_07215	NADH-quinone oxidoreductase subunit NuoI	24.6926	8.64068	1	26.5 (M.score:26.5)	1	5.28846	0.0220827	351	MEEVTFRIAPEEKVKKKPSFLKPWFGLKYLFKKPVTIKIPYEFIEPAPRYRGFHTLDWKKCIGCNMCGQICPARAIEMTWIEGEKRPHPKIDYGRCTFCQFCVDVCPTGALGFIETYMLTTTWREEELLLYDWVPIEPEKFKEIQEKFKDYKFPVEKIEFNKETKEVTYYLRDGTTFKFKILGYGLKPPVKPQPTTKQQEEEKKESGQ
352		FALSE	PFDSM3638_04375	membrane dipeptidase	35.2752	4.96658	1	26.5 (M.score:26.5)	1	2.5641	0.62061	352	MSIGVFDAHSDLPTYIYEERKNGKTRVLEEKFDEFFTGISARVMSIWSKPDKRPIILRYSLEAINRLYSDVAESQRFEIVRSIKEMEEAIKNDKVALWLGLEGGEPIESLDILEIFYSLGLRVLTLTWSLRNQIGDGVFERTNGGITNFGAEVIGKCEELGILIDVSHLNEAGFWDVLDITGFPVIASHSNAKSLCDNPRNLTDEQIKAIAERDGVVGITAVAAFVDKDNPTLEKFIAHVEHVVDLVGYKHVGFGFDFVYYLPEWSGKSVVGLENERRIPDLIERLKENFSEKEVKAIAFDNFKRVFDRVVG
353		FALSE	PFDSM3638_07205	DUF4870 domain-containing protein	12.2807	4.97608	1	26.4 (M.score:26.4)	1	14.2857	0.797356	353	MESGNTSLGLNENVEAALAYAGAFISGIVLLILEKESEFVRFHAMQSTVTFLGLLALDLLLGWIPIFGFVFDFVIKIVAIVAWIVGIVKAYQGERFKFPIAGDLAEHFLPKV
354		FALSE	PFDSM3638_02335	ASCH domain-containing protein	21.8621	9.63467	1	26.3 (M.score:26.3)	1	4.73684	2.46493	354	MKNLKFDGRYKDDIISGKKRATIRLGRKINLKPGEEVLVHAGGYVLGKARIIRVETKKVEELTDEDARKDGFRNKEELIKALKEHYKFVRPDSPATIVEFEMIKLLDKPILSADFPYEGNNPIEIAELALKHLDNLSFEEVALLKLFLNEGSLRKAAMKLGGLNKRYKIREVLRKAYEELKKRGIMQPKI
355		FALSE	PFDSM3638_08890	2-oxoglutarate synthase subunit alpha	43.9628	6.11298	1	26.3 (M.score:26.3)	1	3.0303	1.35831	355	MIIRGDEPEQKALLRKLYRAGNYFMMGDEAIAYGAIFAGCRFYAGYPITPSSEIAETMARELPKVGGYYLQMEDEIASIAAIIGASWTGLKAMTATSGPGFSLMQENIGYAVMTETPVVIVDVQRSGPSTGQATKGAQGDFFQARWGTHGDHPIIAVSPISVEDAFWETIRAFNIAEQLRTPVIVLFDGILGHTREQIRIPDPDEVEISYRKLPRNEEEAKLPFGDPHGDGVPPMPIFGKGYFTHVTGSTHKENGLRDVYTPEVHDRLVRRLHKKIEKNRHIYEKYNEYFTDDAEILVVSWGVSARPSLGAVKKAREEGIKAGLFVPKTVHPFPGEKMRELGKKVRAILVPEMNLGQLILEVQRFVNDDVILKGVNKIGGVPITVEEILREIRGVA
356		FALSE	PFDSM3638_06825	30S ribosomal protein S28e	8.09545	9.95051	1	25.9 (M.score:25.9)	1	22.5352	0.452532	356	MAEDEGYPAEVIEIIGRTGTTGDVTQVKVRILEGRDKGRVIRRNVRGPVRIGDILILRETEREAREIKSRR
357		FALSE	PFDSM3638_02735	hypothetical protein	11.7115	9.47114	1	25.8 (M.score:25.8)	1	12.3711	3.22923	357	MRRLILRRKLLQDRIFILDRILEGLSKKTLREESIDEAYLMLKRILKETTDQRLLEAFESIVTVRATLKNINEEEANKHIENAREMIKRYLEGKKYD
358		FALSE	PFDSM3638_05460	ABC transporter ATP-binding protein	22.6835	9.12635	1	25.8 (M.score:25.8)	1	6.43564	1.85452	358	MKLEIRELSVGYKRPLLEDITLELENGDAVNFYGPNGIGKTTLLKTIATYLKPLKGEILYNGAPIRKVRGKIFFLPESILVPNKVRARDYLKAVASLYGVNPSMEEVVRALDLVGISDENIKFEKCSQGMKRRIQLASALLVNAEIFVLDDPVVAIDEDSKHEILKGIVDTLKKRGIVIISSREKLPYFPINEDVVKYKPKL
359		FALSE	PFDSM3638_05150	hypothetical protein	40.1799	6.89805	1	25.7 (M.score:25.7)	1	1.98864	0.0295849	359	MHELLKLDQASVLEITSIVSRNWPNKLIVVFSGEYPVLFYSNGTLVKSSSSQDVLQDVKVCEVDKFEFLDLFMSEPKVSQVDRAEKYIPKVVEFSYSLVAPSELYLKILNAIVEFAKFAYRRLGLSIELLDATCRLVSGSTGRDILSVDVEVYGYSSKPENELREAIRSNFSKLIREIVGFPARINIKGLEIVHTEEIPKIKIEELPVEIKGGRVVEINLREEIPHKIKIRRRQVEAEVERIIEESGIREIISSIKDLDSESRINKRKIEEKVKANIDRTIKGIKVNWAKLSKVGSSYQIFIGIERTSRSIDELKLSDEIKKLIKNVEEEIRSQGNPISIGRAIVIIEKDIY
360		FALSE	PFDSM3638_00185	RNA-binding protein	21.9588	8.93676	1	25.5 (M.score:25.5)	1	8.12183	0.951763	360	MIEEKKKTVKDGDFVLPGDYLGVIEEYLPGEGVIVEDGNLYSTRAGWVRINKDKVEISLEPASSTPPIPKVGDIVYARVIDIKQQAVLLKMIKIEGKGDREIAMSKLAGIHISQVKDGFVEDLRNEFRIGDIVRARVITDEKSPIQLTTKDPDLGVVYAFCSKCKTPLVRRGNQLVCPKCGNVETRKLSSLYRKVKL
361		FALSE	PFDSM3638_01755	chromosome partitioning protein ParB	27.6896	5.08631	1	25.4 (M.score:25.4)	1	4.13223	4.91815	361	MGVEKVPKYDIPVKKVEYVFIELDKMKPHEQLVQRELEDFIESVTGSGIFWKPMLLAKIPGTDEYLIVDGHHRWAGLQKLGAKRAPSVILDYFDEGVKVYTWYPAFKGDVNKVIERLKAEGLEVIEDEKAEEKAEKGEIAFALIGEKSFAIPGGLEEQKKVSKVLDEMDQAKEIELVYYGLKEDAKADMEKGEIDYVFIRKAPTKEEVMELVKRGEVFSPKTTRHVLPFIPDKIDVKLEDLF
362		FALSE	PFDSM3638_08330	DNA-directed RNA polymerase subunit D	29.7627	4.8839	1	25.4 (M.score:25.4)	1	6.51341	1.17231	362	MAGIEVQILEKKEDSIKFVLKGVHVSFANALRRTILGEVPTFAVDEVEFYENDSALFDEIIAHRLAMIPLTTPVDRFELDALELDDYTVTLSLEAEGPGIVYSGDLKSDDPDVKPVNPNIPIVKLAEGQRLVFNAYAKLGRGKDHAKWQPGFVYYKYYTIVHISKSIPEWKELKKLAKKRGLPVEETEEEVLVTTIKPFYIPKDFEEYEGKEIWEEIVPNTYIFTVETNGELPVEEIVSIALKILMRKADRFISELQKLTS
363		FALSE	PFDSM3638_01760	50S ribosomal protein L39e	6.29981	12.3766	1	25.3 (M.score:25.3)	1	17.6471	0.590937	363	MARNKPLAKKLRLAKALKQNRRVPVWVIVKTNRRVLTHPKRRYWRRTKLKE
364		FALSE	PFDSM3638_01835	tyrosine protein kinase	35.9381	8.36884	1	25.3 (M.score:25.3)	1	2.89389	7.00006	364	MVSKLLALEAYPKLKDIDFRLLRAVELNMRHHKWVPLEDIARFARMDLESASYRLGKLDKLGLVIRRSDIGYIGYQLTIHGYDALAIRAFAKKGVIEAISTTHIGVGKDADVYVAITPQGEKVAIKFNRIGERTSARKAYYHSDVFADKHHKSWLYVSRLIAKKEHEALVLLSSFAKVPKPIAWNRHAIVMEFIDGVELAELRDTDLTKEEAEEILGKVLDEYEKIVKFGIVHGDMSEFNIVITKDNDILIIDWAQYLTCANPESLGLLKRDISVLLNAFRRRWGVKRDFEEEWKRFYEAWQIGRREKEES
365		FALSE	PFDSM3638_00790	Sun/NOL1/NOP nucleolar protein	44.1726	9.28016	2	25.2 (M.score:25.2)	1	1.81347	3.26088	365	MSYLEAFPPELQEYYRKLFGEEAEEIMKRLREPVEHYYIRVNTLKISREKLIEELRKEGLRPRRSPYLQEALYFVREGPNFPDDYNPNLPTVVANKYAAESVYQGAMLYAPGVLKAEKGIKEGDMVQIRDPRGLLVGIGIAKMDYREMIEATRGLAVEVTLPKFKLPSLSELKSFEKGYFYPQSLPSMVTSRVLEPKEEEIIIDMAAAPGGKTSHIAQLLQNRGEIIAIDKSKNRLKKMEENLKRLGVKNVKLIQMDARNLPELGIKADKILLDAPCTALGVRPKLWELRTPKDIEATARYQRAFIWAAIKSLRKGGILVYSTCTLSYEENEGNVKFMLKKGMKLEEQSLFIGSPGIGIDEVQRFYPHKHLTQGFFIAKLRKVREI
366		FALSE	PFDSM3638_08445	hypothetical protein	13.6882	9.34542	1	25.2 (M.score:25.2)	1	10	0.332678	366	MMKKVLGAIALIFVVAGAYGIMHYANEERYYSLRATFRMAGVGYKGYELRDGTLVFKFERKGDVFAQVIVSKEYTTSEKIPIKDVKKVIMEITTNGTTKVYEAKFVGREGEKMIYEAIER
367		FALSE	PFDSM3638_06270	ribose-5-phosphate isomerase RpiA	25.0461	4.46104	1	25.1 (M.score:25.1)	1	5.24017	1.57187	367	MNVEEMKKAVARAALEFIEDDMVVGLGTGSTTAYFIRYLGEMIEKGKVEDIYGVPTSYQAKILAMESGVPVLSLDQVDAIDIAVDGADEVDPNLNLIKGRGAALTMEKIIEYRAGTFIVLVDESKLVDYLCQKMPVPIEVIPAAWKAILEELSIFNAKAELRMGVKKDGPVVTENGNFIIDAKFPRIDDPLDMEIELNTIPGVVENGIFADIADIVLVGTKEGVKRLER

## Sheet: SmAP1 Strep-tag treated 2
Table S2. Mass spectrometry output of replicate 2 of Strep-tagged SmAP1 co-purified proteins.
Row	User Flag	OK	Accession	Protein	MW [kDa]	pI	#Alt. Proteins	Scores	#Peptides	SC [%]	RMS90 [ppm]	Rank	Sequence
1		TRUE	PFDSM3638_03360	methylmalonyl-CoA decarboxylase subunit alpha	57.0757	6.21093	1	1895.4 (M.score:1895.4)	30	45.4023	0.689116	1	MSMEEKVKDLYERKKKIMQMGGEEAIKKQHDKGKLTARERIELLLDPGSFVEIGMFVKHRATEFGMDKRELPADGVITGYGTIDGRLVFVYAQDFTVMGGSLGEMHAMKIKRIMELALEAGAPVIGLNDSGGARIQEGVDSLKGYGEIFKMNTILSGVVPQITAIMGPCAGGAVYSPAIGDFILMVDNPSTFMFITGPQVVKAVTGVEVSPVQLGGAMVHAQKSGQAHLIGKSDEEVIMLIKKLLSYLPSNNMEKPPKIKPKDEPFRRTPELYDIVPDDPNKGYDVRQVIYAIVDRDENGNPDFLELQPYFAPNAVIGFGRINGQPVGIVANNPIHLAGVLDIDSSDKIARFVRFCDAFNIPIVTLVDVPGYLPGVDQESRGIIRHGAKVLYAYAEATV…
2		TRUE	PFDSM3638_07050	DNA-binding protein	79.36	4.75616	1	1592.5 (M.score:1592.5)	24	39.5745	0.51323	2	MKKGLLAILLVGVMVLGTFGSGCIGGGTQTQTQTPTETGSPTQTTTPSGVTQAILELGKVTVVDTGTAIVVVGPKGEKPSVSIPSGKKVITVTYVVDEQNTPSVKELMEQGQGFGAINPAFFRDTNVDALVIAARRETNPEVRTEIFKALYILGNYYVPEVILGQNRQLRVYWDWVKGRYYHPTLPERYDLLWEDPNAPVVDTGIGSYKNDPETYVIATIGWPESFDPAWTYETFGWEIWHEIGDTLVTYWKEETEQVTPDLAVAWAHNKEGTEWYFVIRGGVKAYDPWNDKTYPIDATDVVFTFWRVARLGHSVSWMVTEFMNVSASQALTEEEFNNYVKNNPLIAEYNGKTAEIKSLQDLLNFFGYNGETAGVFKLVLPHPYAAVLNIVADPFLSVV…
3		TRUE	PFDSM3638_09730	amylopullulanase	153.692	4.65351	1	1309.7 (M.score:1309.7)	28	21.6236	0.689975	3	MSRKLSLLLVFLIFGSMLGANNIVKAEEPKPLNVIIVWHQHQPYYYDPVQGIYTRPWVRLHAANNYWKMAHYLTEFPDIHVTIDLSGSLIAQLADYMNGAKDIYQIISEKIANGEPLTYDEKWFMLQAPGGFFDHTIPWNGEPVTDENGNPIRDFWDRYTELKDKMLAAKQKYANLPLEEQKVAVTNEFTEQDYIDLAVLFNLAWIDYNYIISTPELKALYDKVDEGGYTREDLKTVLYHQMWLLNNTFKEHEKINLLLGNGNVEVTVVPYAHPIGPILNDFGWSEDFDAHVKKAHELYKKYLGGGVATPRGGWAAESALNDKTLEILAENGWQWVMTDQMVLERMGIPYSIENYYRPWVAEFNGKKIYLFPRNHDLSDRVGFRYSGMNQYEAVEDFIN…
4		TRUE	PFDSM3638_00140	phosphoenolpyruvate synthase	90.4279	5.152	1	1116.7 (M.score:1116.7)	20	29.4982	0.76636	4	MAYRFIKWFEELSKNDVPLVGGKGANLGEMTNAGIPVPPGFCVTAEAYKYFVENVKVSKEDVKRILGEKVNKGTISEVLAQAPDEPRPLQDWIMDIISKTDVDDSKMLQENTEAIRTLIKSLDMPSEIAEEIKQAYKELSQRFGQEEVYVAVRSSATAEDLPEASFAGQQETYLDVLGADDVIDKVKRCWASLWTARATFYRAKQGFDHSKVYLSAVVQKMVNSEKSGVMFTANPVTNNRNEIMINASWGLGEAVVSGAVTPDEYIVEKGTWKIKEKVIAKKEVMVIRNPETGRGTVMVKVAEYLGPEWVEKQVLTDEQIIEVAKMGQKIEDHYGWPQDIEWAYDKDDGKLYIVQSRPITTLKEEATAEEAEEVEEAEVILKGLGASPGIGAGRVVVIF…
5		TRUE	PFDSM3638_09745	maltotriose-binding protein	48.2131	4.62275	1	1069.2 (M.score:1069.2)	17	40.0922	0.614148	5	MRRATYAFALLAILVLGVVASGCIGGGTTTPTQTSPATQPTTTQTPTQTETQAVECGSGKVVIWHAMQPNELEVFQSLAEEYMALCPEVEIVFEQKPNLEDALKAAIPTGQGPDLFIWAHDWIGKFAEAGLLEPIDEYVTEDLLNEFAPMAQDAMQYKGHYYALPFAAETVAIIYNKEMVSEPPKTFDEMKAIMEKYYDPANEKYGIAWPINAYFISAIAQAFGGYYFDDKTEQPGLDKPETIEGFKFFFTEIWPYMAPTGDYNTQQSIFLEGRAPMMVNGPWSINDVKKAGINFGVVPLPPIIKDGKEYWPRPYGGVKLIYFAAGIKNKDAAWKFAKWLTTSEESIKTLALELGYIPVLTKVLDDPEIKNDPVIYGFGQAVQHAYLMPKSPKMSAVWG…
6		TRUE	PFDSM3638_07930	proteasome endopeptidase complex, archaeal,alpha subunit	28.9909	5.09432	1	929.7 (M.score:929.7)	16	51.1538	0.822609	6	MAFVPPQAGYDRAITVFSPDGRLFQVNYAREAVKRGATAVGVKCGEGVVLAVEKRITSRLIEPDSYEKIFQIDDHIAAASSGIIADARVLVNRARLEAQIYRLTYGEPAPVSVIVKKICDLKQMHTQYGGVRPFGAALLMAGINDRPELYETDPSGAYFAWKAVAIGSGRNTAMAIFEEKYRDDMNLEDAIKLALMALAKTMENPSADNIEVAVITVKDKKFRKLTRDEIEKYLSEVLKEVEEEEVKEKEEDYSELDSNY
7		TRUE	PFDSM3638_06330	hypothetical protein	34.7364	4.68587	1	800.4 (M.score:800.4)	13	35.4515	0.774206	7	MKPYLHRFMRDFIMGDTPEEVSELVLSTLNEFSIDLREILEINDYPIKITVIDTWEKVRGDRIIVLPYSELTDDGSLYFLKQDLEEAMDNPDLEKLKLLAWEMLVSKVSYLLYKNFEEIRSLNNRNDIAILASLLTTTTLLSLDDIKTIAATLEAKISVIKEDLESVDVLFSSIDVLRYDEQEAVYNEVRMKVIRAGAQFLDASIINWMFLQAITLAPLIDPKNEIKRLIKERVFSGDLSKKLDEVFSGIWAFYDLIKIVGKGRFELVELRDKILEYRQRLGLEFYPSTQDFFEKATVI
8		TRUE	PFDSM3638_09460	DNA-binding protein Alba	10.3786	8.00889	1	613.2 (M.score:613.2)	9	66.6667	0.951422	8	MAEEHVVYIGKKPVMNYVLAVITQFNEGAKEVSIKARGRAISRAVDVAEIVRNRFLKDTVDIKEIKIGTEELPTADGRTTNTSTIEIVLERKV
9		TRUE	PFDSM3638_07725	hypothetical protein	30.2766	8.68511	1	597.6 (M.score:597.6)	12	46.4684	0.547203	9	MATPIGFFTAAIILLFILIFLSSAIKIVKEYERAVIFRLGRVVGARGPGLFFIIPIFEKAVIVDLRTQVLDVPVQETITKDNVPVRVNAVVYFRVVDPVKAVTQVKNYIMATSQISQTTLRSVIGQAHLDELLSERDKLNMQLQRIIDEATDPWGIKVTAVEIKDVELPAGMQRAMAKQAEAERERRARILLAEAERQAAEKLREAARIISEHPMALQLRTLQTISDVASDKSNVIVLTLPMEMLKLFKTLSEAAEAYREKVEKEKEKE
10		TRUE	PFDSM3638_07765	small nuclear ribonucleoprotein	8.43766	6.06492	1	568.0 (M.score:568.0)	9	85.5263	1.14645	10	MAERPLDVIHKSLDKDVLVILKKGFEFRGKLIGYDIHLNVVLANAELLQDGEVVKKYGKIVIRGDNVLAISPTEEG
11		TRUE	PFDSM3638_09075	30S ribosomal protein S5	26.5341	9.58308	1	556.8 (M.score:556.8)	12	48.3051	0.678877	11	MSQEWKEYAKRVLDEWEPKTKLGMMVKEGQITDIHEIFRRGYQIKEPEIIDVLLPEVNARENQEVLDIALTVRMTDSGRRVRFRVLAAVGNRDGYVGLGIGHGKEVGIAIRKAINYAKLNIIEIKRGCGSWECRCRRPHSVPFAVEGKEGSVRVRLIPGPRGLGLVIGDVGKKILRLAGVQDVWSQTFGETRTTVNFAKAVFNALYNTNRVAISPEMIERYGIVVGRAMPTTFTLE
12		TRUE	PFDSM3638_08590	BMP family ABC transporter substrate-bindingprotein	44.1739	5.15414	1	549.2 (M.score:549.2)	13	36.1809	0.750058	12	MRKVGITLSVVALVIMGFVAGCIGGTQTQGEKVKVAVLFDVGGRGDLSFNDMAYLGAERAKKELGVEVEYMTPKSREDMVPLLKQLAESKEYDLLVLIGFLWTTPLDQVADQYPDQKFALIDSTTGKVRENEVDILFREQEAAALIGVIASGMAYELGGDTIGAVAGMDIPPLWKFHIGYLYGAKYFEKKTGKPVKLLWQYTGTFTDTQVGYTTGMQLLQQGAKVLYGLAGLTHVGMFDAVIDWNKQGKGKALAIGQDASQEWYAPEYIPISGAKRVDVAVYTAIEMVVKNQWKGGIMTLGLKEGGVGYWNLDGVRQFAEFAQEGGKLKDMTPEDVVRIVKEQREKYIKPEVWEIVRELEEKIKNGEIKFKTPQSHDEYEQIIKELEKGNLDAALEKE
13		TRUE	PFDSM3638_00220	fibrillin	25.7458	7.81556	1	539.0 (M.score:539.0)	10	50.6608	0.624339	13	MVEVKKHKFPGVYVVIDDDGSEKIATKNLVPGQRVYGERVIKWEGEEYRIWNPHRSKLGAAIVNGLKNFPIKPGKSVLYLGIASGTTASHVSDIVGWEGKIYGIEFSPRVLRELVPIVEERRNIIPILGDATKPEEYRALVTKVDVIFEDVAQPTQAKILIDNAKAYLKRGGYGMIAVKSRSIDVTKEPEQVFKEVERELSEYFEVIERLNLEPYEKDHALFVVRKP
14		TRUE	PFDSM3638_07545	30S ribosomal protein S19e	17.3515	9.69352	1	528.9 (M.score:528.9)	9	52	0.426044	14	MATVYDVPGDLLVERVAQRLKEIPEIKPPEWAPFVKTGRHKERLPEQEDWWYYRVASILRRVYLDGPVGIERLRTYYGGRKNRGHAPEKFYKAGGSIIRKALQQLEAAGFVEKVPGKGRVITPKGRSFLDKIATELKKELEEIIPELKKY
15		TRUE	PFDSM3638_07175	NADH dehydrogenase subunit	47.9033	6.58872	1	499.2 (M.score:499.2)	10	29.274	0.776281	15	MKKVEYWVKIPFGPIHPGLEEPEKFIITLDGERIVNVDVKLGYNLRGVQWIGMRRNYVQIMYLAERMCGICSFSHNHTYVRAVEEMAGIEVPERAEYIRVIVGELERIHSHLLNLGVVGHDIGYDTVLHLTWLARERVMDVLEAVSGNRVNYSMVTIGGVRRDIGEKQKRLILDMIKYYREVLPQIEDVFLHDSTIEARLRDVAVVPKKLAIEMGAVGPTARGSGIKEDSRWSEQLGVYPDLGIKPVTPEDVTGEKARGDVYDRMAVRIGELWMSLDLLEHALDQMPEGKIKTFPKDNILVAKLKLLGDGEGIGRYEAPRGELVHYVRGQKGRDGPVRWKPREPTFPNLFTIAKALEGNELADLVVAIASIDPCLSCTDRVAIVKEGKKVVLTEKDLLK…
16		TRUE	PFDSM3638_08700	translation initiation factor IF-2 subunitgamma	45.01	8.10609	1	461.0 (M.score:461.0)	10	27.0073	0.980363	16	MGEKRKTRQAEVNIGMVGHVDHGKTTLTKALTGVWTDTHSEELRRGITIKIGFADAEIRRCSNCGRYSTSPICPYCGHETEFIRRVSFIDSPGHEALMTTMLAGASLMDGAILVIAANEPCPRPQTREHLMALQIIGQKNIIIAQNKIELVDKEKALENYRQIKEFIKGTVAENAPIIPISALHGANIDVLVKAIEEFIPTPKRDSNKPPKMLVLRSFDVNKPGTPPEKLVGGVLGGSIVQGKLKVGDEIEIRPGVPYEEHGRIKYEPITTEIVSLQAGGQFVEEAYPGGLVGIGTKLDPYLTKGDLMAGNVVGKPGKLPPVWTDLRLEVHLLERVVGTEQELNVEPIKRKEVLLLNVGTARTMGLVTALGKDEIELKLQIPVCAEPGERVAISRQIGS…
17		TRUE	PFDSM3638_08290	hypothetical protein	37.6996	4.40122	1	423.5 (M.score:423.5)	6	19.174	0.487653	17	MSIIQDIIGRIVVLRGGQYSVEVDVVTDESFGRFAAPIDENPALYIAEARRAVSEVDEIIGPELIGFDAIDQELIDSYLWEIDGTDNFSHIGANTALAVSVAVAKAAANSRNISLYSYIGGTFTTELPVPVVTFGADENFEYHVIVRDLLEVTDIIDAVVRLLDFSLSLEELSKASEQVGLELGLEVSLGITMRKELETEKVLEIVEDYNIAYIKPIGTPELFLELIAGTHGVFIDGEYLYRKYNILDRKYYNALSIKPINLGTLTDLYNFVNDVKAEKITPILSESKYEPADETLPHLALGLRCPAMLIHMNSVEKINELNRIAEELGERGRIITFEE
18		TRUE	PFDSM3638_09940	thermosome subunit	59.9438	4.89907	1	418.4 (M.score:418.4)	8	18.3971	1.03183	18	MAQLAGQPILILPEGTQRYVGRDAQRMNILAARIVAETIRTTLGPKGMDKMLVDSLGDIVITNDGATILDEMDIQHPAAKMMVEVAKTQDKEAGDGTTTAVVIAGELLRKAEELLDQNIHPSIIIKGYTLAAQKAQEILENIAKEVKPDDEEILLKAAMTSITGKAAEEEREYLAKLAVEAVKLVAEKEDGKYKVDIDNIKLEKKEGGSVRDTQLIRGVVIDKEVVHPGMPKRVEKAKIALINDALEVKETETDAEIRITSPEQLQAFLEQEERMLREMVEKIKEVGANVVFVQKGIDDLAQHYLAKYGIMAVRRVKKSDMEKLAKATGAKIVTNIRDLTPEDLGYAELVEERKVAGESMIFVEGCQNPKAVTILIRGGTEHVVDEVERALEDAIKVVK…
19		TRUE	PFDSM3638_05725	proteasome assembly chaperone family protein	29.9675	4.87974	1	390.4 (M.score:390.4)	8	37.0787	0.528974	19	MKETTIVVYERPDIYDPIFIEGLPGIGLVGKLAAEHLIQELKAKKFAELYSPHFMHQVLIRKNSVVELMKNEFYYWKSPDDEHRDLIIVTGDTQVPPTDSYGHFEVAGKMLDFVQEFGTREIITMGGYQVPEIQGEPRVLAAVTHEDLIEYYKSKLEGCSVEVIWREDEGGAIVGAAGLLLGIGKLRGMFGISLLGESLGYIVDAKAAKAVLSAVTKILGLEIDMTALDERAKETEEILRKVEEMQRAMMEQVTPKLPHEEEDRGYL
20		TRUE	PFDSM3638_05645	type III-B CRISPR module RAMP protein Cmr4	32.6095	5.5942	1	385.2 (M.score:385.2)	9	36.2712	0.859754	20	MKAYLVGLYTLTPTHPGSGTELGVVDQPIQRERHTGFPVIWGQSLKGVLRSYLKLVEKVDEEKINKIFGPPTEKAHEQAGLISVGDAKILFFPVRSLKGVYAYVTSPLVLNRFKRDLELAGVKNFQTEIPELTDTAIASEEITVDNKVILEEFAILIQKDDKGILESVVKAIEQAFGNEMAEKIKGRIAIIPDDVFRDLVELSTEIVARIRINAETGTVETGGLWYEEYIPSDTLFYSLILVTPRAKDNDMALIKEVLGKINGKYLQIGGNETVGKGFVKVTLKEVTNNGGTHAK
21		TRUE	PFDSM3638_00225	C/D box methylation guide ribonucleoproteincomplex aNOP56 subunit	46.7591	9.4204	1	372.1 (M.score:372.1)	8	26.8657	0.833857	21	MKAFISENVRGIYAFDENGNLIEKRYFTDKPEKVLDQLLKGEITKDLEELLNSLKEKGYDEFVFEHPELSRRAKELGFSATTEFPNIAGERLRSNPEEFLGENWFEEYYKVGVALTRMRIQEQSGARDKMVIQAIEALDDVDKVINLLVARLREWYSLHFPELDELLPKHPQYVAFVKTVGHRDNINEEVLRELGLSEEKIKKILEAKEKTMGAWMDQTDIEVVRQLAEEIDRLYQLRKKLEDYIDRAMDDVAPNLKALVGAKLAARLISLAGGLRELAMMPSSTIQVLGAEKALFRHLRTGAKPPKHGVIYQYPAINRSPWWQRGKIARALAGKLAIAARVDYFSGEYIAEELKKELEARIREIKEKYPKPPKRKREERKGKKPWKKDKKKKKKKEKP…
22		TRUE	PFDSM3638_04855	pyruvate ferredoxin oxidoreductase	44.149	5.02853	1	366.5 (M.score:366.5)	7	25.2525	0.865507	22	MPIRKVMKANEAAAWAAKLAKPKVIAAFPITPSTLIPEKISEFVANGELDAEFIKVESEHSAISACVGAAAAGVRTFTATASQGLALMHEILFIAAGMRLPIVMAIGNRALSAPINIWNDWQDTISQRDTGWMQFYAENNQEALDLILIAYKVAEDERVLLPAMVGFDAFILTHTVEPVEIPDQEVVDEFLGEYEPKHAYIDPARPITQGSLAFPAHYMESRYTVWEAMERAKKVIDEAFAEFEKKFGRKYQKIEEYKTEDADIIFVTMGSLAGTLKEWIDKKREEGYKVGAAKITVYRPFPVEEIRELAKKAKVLAFLEKNITIGLYGAVFTDASAALINESEKPLMVDFIVGLGGRDVTFNQLDEALEIAEKALKEGKVENPINWIGLRWELVK
23		TRUE	PFDSM3638_01310	FAD-dependent oxidoreductase	53.7309	7.17373	1	360.0 (M.score:360.0)	8	25.2588	0.520891	23	MEKFDVIIIGAGPAGLFAAYELVERSNMKVLIIDEGGDVDQRVCPMDQLGYCIGCKPCHIMSGVGGAGGLSDGTVNLRPDIGGDLTELTNDENYSWQLVWEVDQILLKHGAPRNLYKGDPDQIRYWERKAAQAGVKFIPIIQRHIGSDNTPRVIKSIKQYLESKGVKFLLWTKALEFNKGWVKVRRGKDVFTIEGKYIIVAPGRGGAEWFHEIAQKIGLKARHGPIDVGVRVEVPAIIMEPITSINHDPKFHIYTDTYDDFVRTFCTNPYGFVVEERYDGYVGVNGHSMRNKKSNNTNFAFLTRIELTEPVEDTTAYGRSIAQLATTIGGGRPILQRLGDLRRGRRSTWSRIRKSNVEPTLKHVTPGDIAMALPHRVVTNIIEGLEKLDKVIPGVASDH…
24		TRUE	PFDSM3638_01370	pyrolysin	154.378	4.45794	1	342.9 (M.score:342.9)	7	6.08011	0.738891	24	MNKKGLTVLFIAIMLLSVVPVHFVSAGTPPVSSENSTTSILPNQQVVTKEVSQAALNAIMKGQPNMVLIIKTKEGKLEEAKTELEKLGAEILDENRVLNMLLVKIKPEKVKELNYISSLEKAWLNREVKLSPPIVEKDVKTKEPSLEPKMYNSTWVINALQFIQEFGYDGSGVVVAVLDTGVDPNHPFLSITPDGRRKIIEWKDFTDEGFVDTSFSFSKVVNGTLIINTTFQVASGLTLNESTGLMEYVVKTVYVSNVTIGNITSANGIYHFGLLPERYFDLNFDGDQEDFYPVLLVNSTGNGYDIAYVDTDLDYDFTDEVPLGQYNVTYDVAVFSYYYGPLNYVLAEIDPNGEYAVFGWDGHGHGTHVAGTVAGYDSNNDAWDWLSMYSGEWEVFSRL…
25		TRUE	PFDSM3638_01020	enolase	46.8062	4.9826	1	338.7 (M.score:338.7)	7	25.1163	1.1575	25	MENPYEIVGVVAREILDSRGNPTVEVDVYTHVGMGRAAVPSGASTGTHEALELRDGGKRYHGKGVRRAVENVNKIIAPELIGMDVRWQREIDALLLELDGTENKSNVGANAILAVSLAVAKAAANSLELPLYQYLGGVNAYVLPVPLSNVINGGVHAGNDLDFQEFMIMPIGADSFREAIRWVSETYHVLKKVIMEKYGKNAVNVGDEGGFAPPMKEVTEPLDVLIKAIEEAGYKPGDEIALALDVASSELFNEETGKYVVGGKEYDRGELLELYKDLTSTYPIVSIEDPFHEEDWEGFVMITKELGHKVQIVGDDLFVTNPKRLRKGIELGAANALLLKVNQIGTLSEAMDAAFTAFRAGYGVIVSHRSGETEDATIADLAVALNAGQIKTGAPARSD…
26		TRUE	PFDSM3638_08920	ABC transporter substrate-binding protein	37.9468	4.86585	1	315.8 (M.score:315.8)	6	21.9653	0.474034	26	MKRAIPVFLLIVLVWISGCIGGGTSTIPTTPSAPETTTITKTEKVVETVTQTVTVTQTMTPQKYPITIVDSLGREVKIEKEPERIVSLAPSITETLYFIGALDKVVGVTKFDDFPPDVKEGRTIIGGFSDPNIEVIASLNPDLIIGTSMHMQYLDKLQEIAPVIIVDPKNIDEIYEWIIKLGKVVNREEEAVGVVNYMKAIVEDVESKVSNASRPKVFYLLGYWDGYWTTGKGTFIDSLITMAGGENIFSDIEGWKKVSAEDIVARNPEVIIISYHAGVNPGDLCNTPLANTDAVKNGRVYVISDDNIISRPGPRIVLALQEIAYFIHPEAFNYAYQPKACAVASS
27		TRUE	PFDSM3638_08940	serine hydroxymethyltransferase	47.9564	5.85226	1	304.3 (M.score:304.3)	6	22.2482	0.725796	27	MTYKEYRDKVLNFIEEHEKWRSHTINLIASENITSPSVNRAVASGFMHKYAEGWPKQRYYQGCKYVDEVELIGVELFTKLFKSDYADLRPISGTNANQAVFFGLGQPGDKVIVLHTSHGGHISHMPFGAAGMRGLEVHTWPFDFESFNIDVDKAEKMIRELEPKIVMFGGSLFPFPHPVKELAPVAKEVGAFVVYDAAHVLGLIAGGEFQDPLREGADIMTASTHKTFPGPQGGVILYKKFADDETIAKLQWAIFPGVVSNHHLHHMAGKVITAAEMLEYGEAYAKQIVKNAKALAEALAEEGFKVIGEDQGYTKSHQVIVDVSDLHPAGGGWAAPLLEEAGIILNKNLLPWDPLEKVNEPSGLRIGVQEMTRVGMMEDEMREIAHFIKRVLIDKEDPK…
28		TRUE	PFDSM3638_06320	5-methyltetrahydropteroyltriglutamate--homocysteine methyltransferase	35.451	5.20947	1	298.1 (M.score:298.1)	6	24.9191	0.527117	28	MIVPALIGSLPRPIGLAKKLEQYYIGRLDERKLEEAYREYTRRAFEKLRDAKIKVITDGLYRWDDIFNPFIRFIDGIEVNGLFKFYENNFFYRSPVVRGEIALKENPIPEWISIAQEIKEDVYPEATLKAVLPGPVTLAYHSINEYYKTLTDLAEAYAQVIGELIKELDVKIVELQEPSLAAEISEATKNIEDRVDKEVAKNIIEDLGRIKKLWVVTYFGTPQVLPEGVILNVDLIEGSVPEEYSGEIGLGIVDARTTKMERADRLRDKIRKYLAKFETIYVTPNTLLDFLPESVAWKKLRLLGRLGGE
29		TRUE	PFDSM3638_00520	ABC transporter substrate-binding protein	61.2235	5.59228	1	294.4 (M.score:294.4)	8	20.7024	1.09597	29	MKHKAVFLLVVLISGVLASGCIGGETKETQASKKVQLTGDFAKDVIKIGKVLEENGISEVKFSAWGSGDPNSVMRVYGIVDAAYKINKIWKENGISVKITVTVKYDQSFNDQYKEFLSKQPLGQAGDFFVNSYAFLSTLAEEGYILDITDYAQAYQSVINDFYPTLLDASKYNGRLYGLPQDTEARPFYVRKDVAQCVGLDVSQLPEKVKNGEFTWSDVYYWAKQAKEKGCAEWGLIHRKGSAHPDLIQFIFAFNGKLYDENTGKLVLDVPAVYKWLYVEWKFARDGLLPEDIMSWDWAKQIHPTIVEGKTLFDIGGTWYWTEWQTKQYYKGRSLTPEEVKEWFAYTLFPAGEKGAKPVTLSQPFIWMINSKAGQLNPKYEELKDVYQALAFLMIIKAS…
30		TRUE	PFDSM3638_00630	rubrerythrin	37.3278	5.40183	1	280.9 (M.score:280.9)	7	31.2693	0.703049	30	MENDLKKLTKEIVGRLKNKSVKELLSYAIFNEEEEAKFYADLAEKVSRPSVKALFRRMSEESKVHELLLRKLFSKYFPGEEPVKVDVPPVEVVPFISKFESIEDYLEGLRYCMESELFAKRTYVLLSQVAENEGVRMVANELASIEQNHYEEIKAVYELVKTFRDREMLPESLKSGAYLITNESVGKYLILDLIDENKKLKLFVRENPEIFRRLIGENPNVEITWIAKVNAPNTISPTETHVLKKDIESFFEKVTKEGKKGVVFIQNVAYLVANLGFKETVDLLLHAKDLAVYYGGYLIITANPEVFEKTEWALLKLEFEVLF
31		TRUE	PFDSM3638_09690	DNA repair and recombination protein RadA	38.3754	6.1964	1	274.0 (M.score:274.0)	5	22.063	0.945055	31	MAGEEVKEIDEFEELGFEPATEETPKKKKKEKIIRSIEDLPGVGPATAEKLREAGYDTLEAIAVASPIELKEVAGISEGTALKIIQAARKAANLGTFMRADEYLKKRATIGRISTGSKSLDKLLGGGIETQAITEVFGEFGSGKTQLAHTLAVMVQLPPEEGGLNGSVIWIDTENTFRPERIREIAQNRGLDPDEVLKHIYVARAFNSNHQMLLVQQAEDKIKELLNTDRPVKLLIVDSLTSHFRSEYIGRGALAERQQKLAKHLADLHRLANLYDIAVFVTNQVQARPDAFFGDPTRPIGGHILAHSATLRVYLRKGKGGKRIARLIDAPHLPEGEAVFSITEKGIED
32		TRUE	PFDSM3638_09725	ABC transporter ATP-binding protein	41.308	6.9444	1	268.2 (M.score:268.2)	4	15.9459	0.663206	32	MAGVRLVGVWKQFGSFTAVKDLTLEVRDGEFLVLLGPSGCGKTTTLRMIAGLEEPTKGQIYIGDKLVADPEKGVFVPPKDRDIAMVFQSYALYPHMTVYENIAFPLKLRKVPKQEIDKRVREVAEMLGLTELLNRKPRELSGGQRQRVALGRAIVRRPQVFLMDEPLSNLDAKLRVKMRAELKKLQKQLGVTTIYVTHDQVEAMTMGDRIAVMNQGVLQQVGTPEEVYEKPANTFVAGFIGSPPMNFLDATITEDGFLDFGEFRLKLLPDQFEVLQDYVGKEVIFGIRPEDIYDALFAQVKIPGENMARGVVDIIENLGGEKIVHISIGGLIVTAKFPGESRVKEGDEIDIVFDMKKIHIFNKKTGKAIL
33		TRUE	PFDSM3638_07070	ABC transporter ATP-binding protein	37.6196	8.76212	1	264.3 (M.score:264.3)	6	20.3647	0.397617	33	MEYDRDVVLKVENLKKYFPVRGLIRTIGWVKAVDGVSFEIRRGETFGLVGESGCGKTTTGRTILRLIEPTDGKIIFMGKDVTKLKGEELKWFRRKAQIMFQDPYSSLNPRQTVFEIIMEPVKFHGIQVDDPEEFVIKLLESVGLNETHLYRYPHEFSGGQRQRIALARILALRPEFIVLDEPTSALDVSVQANILNMLKDLQKEYGFTYLFISHDLGVVKYMSNRIGVMYLGKLVEVGPADKLFENPLHPYTQMLFSAIPIPDPDIAREMKKKRMKVTGEPPSPINPPSGCRFHPRCPYFKAGVCDKKEPPMVEVEKDHYVACWLYAKA
34		TRUE	PFDSM3638_09625	hypothetical protein	18.2176	5.26191	1	262.6 (M.score:262.6)	4	28.3871	0.723545	34	MKGRLQAHNIRIRTFIHATEDPEKVLEALETLFPEDISPKDVEFEIIETEGYFGNPILVLDAELKHSRNIRKFLENLRNLLSEEDKKYLLEHIEEKVDETGTFYIRFDKQKAYLGEVKVSEGEDVIHLRIKVKAFPMRKESVVEAVKKWLEGEME
35		TRUE	PFDSM3638_00270	phosphoserine phosphatase	36.8382	9.3278	1	248.9 (M.score:248.9)	5	23.3333	1.58939	35	MQVKVDPEEIRRIKQELEELQREKRDIEFKLEELQKELNVWIQKRDEKNLEVRRLREKAREFKAKRDEINQKIKELKKNKEEINAKLDLLYQEALEYKTKRDEFKQLRRLKMPKEKIEERIEKLEWELQTNPNITPEREKQIVDQIQVLATELEIIQQVERFNNKLQEVRKKIEQLKKARRAISLEIQQLANQSQQFHEQMIKTYQKADEVKKEADEYHQKVLEIREKIREVRRELRELERKILEYDQKHKELLAYKLAARLLSKRDANFEKAVQALEKFKRGEKLTLDEILLLQRYNLV
36		TRUE	PFDSM3638_00740	proteasome endopeptidase complex, archaeal, betasubunit	21.6353	5.16407	1	242.4 (M.score:242.4)	4	23.9796	0.867466	36	MEKKTGTTTVGIKVKDGVVLAADTQASLDHMVETLNIKKIIPITDRIAITTAGSVGDVQMLARYLEAEARYYYFTWGRPMTTKAMANLLSNILNENRWFPYLVQIIIGGYVDEPTIANLDPFGGLIFDDYTATGSGTPFAIAVLEEGYREDLTIEEAKELAIRAVRAAGRRDVYTGSKKVQVVTITKDGMKEEFVV
37		TRUE	PFDSM3638_08340	30S ribosomal protein S4	21.3246	9.98351	1	241.1 (M.score:241.1)	5	18.8889	1.04193	37	MGDPKRQRKKYETPPHPWIKERLDRERVLMDKYELKNKKELWKHETQLKNFRRRARRLLAARGKQAEIEREQLLARLKRLGLLPEDAVLDDVLSLTIEDILERRLQTIVYKKGLARTMRQARQLIVHGHIEVNGQIIRSPSYLVLKEEEDTITYARTSPFANPQHPERMMIEKAKQGGEA
38		TRUE	PFDSM3638_05625	type I-B CRISPR-associated proteinCas7/Cst2/DevR	39.8459	6.12634	1	235.3 (M.score:235.3)	6	22.792	1.04737	38	MKFAAGFVLIDAPHSALNMLGIDENLPDRNVTRVKTLRRGGNRYVYVSPQAWRYWWRTTLKEYFKWELSPLFREEKQVFTAANPIKYPDDDVFGYMRAYKKNNVNVTVTRVSPLKNTPLISVLPDRSSLTIDEGYASRHEGDPVPYSQEFYSTVLKGAFSLDLDLVGRFTTKNKAGYKNLLTRSDIPKKGKAGEIVKEIEELEKLAREIGVEIKEEEWIMPKEVRKKRAVETIKALRYLTGGAKQTQYHTDVTPKFFLGIIVNGGINPFISGIVREEKGEIILDAEALATRLEDFSEIIDSELFLGYDKGFVKELGLDIEALKSAVSIEVMEGKVGEVIESFAEEAGKYYL
39		TRUE	PFDSM3638_07920	RNA-binding protein	29.5159	8.88667	1	234.3 (M.score:234.3)	5	26.1364	0.878218	39	MRRIFVQNRELVVPGTLLAQGPYKNGRGTFKEGSRIYSTVIGLVDIKGNTIRVIPLEGPYIPEVGDNVLGKIVDVKFSSWTVDIGSPYSATLKIQDYTDEKIDLLRTDLRKFFDIGDIIYAKVKGINEVNNIELTTKGMPFNGGPLRGGQIIKITSSKVPRVIGKGGSMINMIKKLTQSRIIVGQNGWIWISSKNPELEKLAIEAILKIERESHTRGLTDRIKNMLLSKLQELKERGVIEEIPSLEEETQEETVMENDVEARGP
40		TRUE	PFDSM3638_10365	30S ribosomal protein S3ae	22.9275	9.96835	1	221.0 (M.score:221.0)	5	23.7374	0.894878	40	MAAKRATTTRDKWKLKQWYIIYAPDFFGGVEVGLTPADDPEKVLNRVVEVTLKDVTGDFTKSHVKLYFQVYDVKGQNAYTKFKGMKLARSYIRSLVRRKTTRIDGIFNITTKDGYKLRVMAMAIAMRRIQTSQERAIRKIMQEIIYKKAEELNFKDFVLESVNGKIAAEIAKEAKKIYPLRKAEIRKIKVLEEPQVIA
41		TRUE	PFDSM3638_00420	hypothetical protein	36.6828	4.4966	1	214.5 (M.score:214.5)	4	14.8734	0.843482	41	MTSEDIINALKAGNIEKAKELLTKEIDRLTDEELREVLEVAEEVAKEKRDLELYKLVVYYYAEFFGISKLHEFEEFARKFETKGLLHVADLYSLLGYPEKALEIYEGVLAEEKRPEIVGEVYYSIAAIYEELQEYEKAIEFIRKAIEEFKAANAKRKELQARVYEGYLLYESGDKVKAKEILAKLLAEVEDKELIAQIHLAFEEMFEDEENYEAAFHECLYAMINSKDSDFFEIAFDGLVDLIWQAIIDDSFEEIYNSMPMFKVAFPELSDFFEGVRLIALYKDGKAGREDVSAILDRIKDERLLSILEFLGEAEL
42		TRUE	PFDSM3638_08320	50S ribosomal protein L18e	13.7235	10.3493	1	213.0 (M.score:213.0)	3	30.8333	1.6192	42	MKRTGPTDPNLRRLIRYLRKKSNEYGVKIWKDVAWRLERPRRQRAEVNVSKINRYANDGEMIVVPGSVLGAGKLEKKVIVAAWKFSETARRKIIEAGGEAITIEELIERNPTGSGVRIME
43		TRUE	PFDSM3638_02395	translation initiation factor IF-2 subunit beta	16.2236	8.29835	1	212.1 (M.score:212.1)	5	35.7143	0.839001	43	MEIDYYDYEKLLEKAYQELPENVKHHKSRFEVPGALVTIEGNKTIIENFKDIADALNRDPQHLLKFLLREIATAGTLEGRRVVLQGRFTPYLIANKLKKYIKEYVICPVCGSPDTKIIKRDRFHFLKCEACGAETPIQHL
44		TRUE	PFDSM3638_04980	phenylalanine--tRNA ligase subunit beta	63.9232	4.88134	1	211.2 (M.score:211.2)	5	11.5108	1.22911	44	MPKFDVAKSDLERLVGREFSVEEWEDLVLYAKCELDDVWEEDGKIYFKLDSKDTNRPDLWSAEGVARQIRWALGLAKGLPKYEVEESDVVVYVDKKLRNIRPYGVYAVVEGLKLDEEALSQLIQLQEKVALTYGRRRREVAIGIFDFDKVKPPIYYRAAEKTEKFVPLGYSEEMTLEEILEKHEKGREYGHLIRDKPYYPLLVDSEGNVLSMPPIINSELTGRVTTETKNVFVDVTGWDLRKVMLALNVIVTALAERGGKIKRVKVIYPDFEITTPDLTPKEFEVSFEYIRKLSGLELSNEEIKELLERMMYEVEILSENKAKVKYPAFRDDIMHTRDVLEDVLIAYGYNNIDPEEPKLAVQGRGDPFKDFEDAIRDLMVGFGLQEVMTFNLTSKEVQF…
45		TRUE	PFDSM3638_01200	30S ribosomal protein S24e	11.6722	7.84194	1	210.6 (M.score:210.6)	5	55.5556	0.387505	45	MEIRIKEIKENKLIGRKEIYFEIYHPGEPTPSRKDVKGKLVAMLDLNPETTVIQYIRSYFGSYISKGYAKAYDSKERMLYIEPEYILIRDGLIEKKEGE
46		TRUE	PFDSM3638_09115	30S ribosomal protein S4e	28.1282	9.88866	1	206.6 (M.score:206.6)	5	24.6914	0.834669	46	MARKGPKRHLKRLAAPTSWYIERKAYKWAVRPRPGPHNMRTSIPLLYIVRDYLGYAKTAREARKILNEGKFLVDGRVRKDYKFPVGIMDVVSIPETGEHYRVLPNRIGKLILHPISEDEAFIKPLRIRNKRMIKGARVQLNFHDGTNHIVSIAEKDNYFTSYTVLMKVPEREILEVLPFEKGAYVFVTQGKNVARKGRIVEIKRFPMGWPDVVTIEDEEGELFDTLKEYAFVVGTDKPKISLP
47		TRUE	PFDSM3638_00485	polyhydroxyalkanoate depolymerase	40.0286	8.34673	1	202.3 (M.score:202.3)	4	14.9718	1.3594	47	MEVNKASLTYDVPEDREYATKRILSLKRPSKIMVIGDVDTGKTTLIVYLANELISRGFKVAIVDADVGQKGILPPATISLALADMKFSSLSELKPLIHYFVGSITPSQFFGEMIVGTMRLSEIGKKFADYVLIDTTGMIYGSGVELKRLKIEAVKPDLILALEKKEELNPIVSGFEDKTIKLKVSENARSYSRSERRQIRQEKWRKYFENAKIVSFSLENVVVTGTSLFQGSDIREEEKSLLERLFKWVILHGRRIGDKYFVVKADVAEVPRVVDKNVVRYFDFEKLSNLLVGLLNEEGLCLGVGIIKGINFGEKRIDILTPVSEIENVREIRFGRIRVREDGEELGILDREAL
48		TRUE	PFDSM3638_04975	phenylalanine--tRNA ligase subunit alpha	57.7145	9.20347	1	198.2 (M.score:198.2)	6	12.4248	0.892339	48	MLGYNEKLVLLKLNEVKKARIEELVKLTGLEQVAIMRALLTLEKEGLAKISERKERIIRLTDLGRKYIQMGLPEIRALNVLKSKKKVKLDELRGVLTEDELKPIVGILRKEGWVKVEKTPEGLVLEITERGENPEERPIDKALKILSEKEYATSEEISKIVPINELKRRKVAQEEEVVERIAEITEKGVELVKKGIELKREVTSLTPELIASGKWREVEFKPFNIKAPVKKIYPGKKQPYRVFLDKIRRKLIEMGFIEITVDSLIETQFWNFDALFQPQNHPAREWTDTYQLKYPEKGYLPNRELVERVKEAHERGLAGSRGWGYVWSPERAMFLMPRAHATALSARQLAKGIEIPGKYFTIQRVFRPDVLDRTHLIEFNQIDGFVAAEDLTFRHLLGI…
49		TRUE	PFDSM3638_07005	S-layer protein	65.6784	4.37655	1	195.0 (M.score:195.0)	5	10.9091	0.567574	49	MKVKKIAALAVGAAVAGATLGFASAQGEVPEIPKDFFVKDGKPNVKIVVGSEGAAMDVVSAADIAAAIGSLLYTEKDVEVTDATVVARKDVTEPIEKIPVFDNYDTNTAHKYKVGDNLKDVPAWWNGSDFVANFSTSVWNDGVYDKAVEIRIDNIGSVGSYDLAANLTLKGIALDGITDSEVDVIDDFEDFTVNVSTVVANISLVVYNYTLKGQPTVDKITKDETIPEVNLITNLFLDNSTLAKFYPDYDGYTIEGVKVLKSGVGEGETLKILDNEYPIVFIGKDIQETACGDCFTYGKDWGEDYYNQGETYNFGDYKVTILDIDVARDKAFIKVESPSGDTETTTLAVGGTEAQTFFDGGIRIQIKDTFVGISGTNAVKLHVWTDLKTVKSGDEIMPG…
50		TRUE	PFDSM3638_09450	GlcNAc transferase	39.8084	5.44776	1	192.1 (M.score:192.1)	4	16.2722	1.2078	50	MDKLKLYVAGFLALIIGIAGFIVWKWGFWMLIRIILSLGFLGLTLMLAFFLALTIYAESWKYALLLLPFTIISGYATYLSITWQKLKVIGGIILFFIAVLAFGIWYISEPDLSITDRFRSAEKLERMGKYKQAARKYEKAGNYLKAAEMYLKLGWLESAAWAYEKAGEYAKAAELYEQLYEKEKDTYYLKEAHEYWKKAGNMERAAKALERYAQEEPWFWEDVAKLYEELGNQEKAREAWMKALEYYKGEAQEEGVFWEDVGNIARKLGMEELAREAYQKFLEYCLKEAEEDPMWWKHVAEAYEYLGEKEKAEEARKKYEEYRQKIMKSNEETSNFPS
51		TRUE	PFDSM3638_10040	50S ribosomal protein L10	37.1058	4.90975	1	186.3 (M.score:186.3)	5	22.4189	1.89572	51	MAHVAEWKKKEVEELANLIKSYPVVALVDVSSMPAYPLSQMRRLIRENNGLLRVSRNTLIELAIKKVAQELGKPELEKLINYIEGGAGILVTTMNPFKLYKFLQQNRQPAPAKPGAKVPKDVVIPAGPTSLAPGPIVGQMQAMGIPARIERGKVTIQKDTVVLKAGEEITPELANILNALGIQPLEVGLDLLAVYEDGIIYTPDVLAIDESEYINMLQKAYMHAFNLAVNIAYPTPQTIEAIIQKAFLNAKAVAVEAGYITKETISDIIGRAIRAMLLLAQQLPEDVLDEKTKELLSAQAQVSVAQVEEEKKEEKVEEEKEDEEASEEEALAGLSALFG
52		TRUE	PFDSM3638_01425	hypothetical protein	17.5062	4.67722	1	182.9 (M.score:182.9)	4	28.2051	0.749296	52	MVEVEKIEKLIEEISEEIKKAKTPEEVEVLERKVKSLKSLIEAIEGDKALDEVAMLMDKLGPMIEDVLGPIKELISELYNPERMAALGKSVAQFYKDLVEAGMDKEAALELTKEYMASINLFKSLMESLTKVVSMKGNIPFGGPKIEIEKEEEGRE
53		TRUE	PFDSM3638_07030	proteasome endopeptidase complex, archaeal, betasubunit	22.3698	6.84261	1	178.7 (M.score:178.7)	4	29.1262	0.716993	53	MLHLKEKLKGTTTVGLVCKEGVVLAADTRASLGNIIYAKNVTKIHKIDEHLAIAGAGDVGDILNLVRLLKAEANLYKSTVGKEMSVKALATLLANILNGSKYFPYLGWFLVGGYDEKPRLFSVDMVGGITEDNYAAAGSGMEFAYSILDSEYREEMSVNDGIKLAVKAINVAIKRDVFTGDGLLVVTITKDGYKEYRGAELEKMLK
54		TRUE	PFDSM3638_00275	RNA-binding protein	65.9645	8.13108	1	178.2 (M.score:178.2)	4	9.12281	0.61469	54	MEVIKHDGPGRLGVIRLEPPVQTPALAGVDFTLSPFNSFFYPKDYKEYDFNLAPAIPLSYYTPDEIIKKAVKRLWEVDYSKFNAFYFPALKRTKHYEELFKIIEENDFDAIYIGNSKSMIKDYRGFVFTMRELREKFPNAVLITDLEPFFYPLAVYLGIDAFDIRSLKIYSYEGLGFTQFSPIIWDEPKEDPVEYAKKIIRLIRIAIHEGKLRYLVENFLPTSMNAGILRIADRENIEYLEKYTPVDDKTVVFISDYSMTRPEVYRWAKRVRERFEPPKDIELLLILPCSAKKPYSRSRSHTLYRSAVKEALGEKMHRVHELIVTSPYGVVPREWEWIAKYDIVVTGHWSEREVRLAGELLADVLEKYPDIPIIAHVEGGYREAVKLAMELSGRDVIFT…
55		TRUE	PFDSM3638_07160	hydrogenase	13.0349	6.71807	1	176.7 (M.score:176.7)	3	31.3043	0.58969	55	MFGYWDPLYFIIVFIIGLILAYLLNLWAKKSGMGTREVGEGTKIFISGEDPEKVIPGFEHLEGYYTGRNTMWGLVNGVKKFFATLKNDHTGLLPDYVSYLLMTTAFILVILLLRG
56		TRUE	PFDSM3638_06470	hypothetical protein	15.7273	5.96024	1	173.5 (M.score:173.5)	4	29.6296	1.05862	56	MFEEVEVEAYVYPTEDIEKVKKAMLNLVPGLKFEAFDKGEYMILVGRTRDKRALQRLYELFRGQQILDTARMMLEEGYFGEEIIIKVHKQVAYVGKVNFNEESPLGPITIIIRTKEPQKLMKWLAPRTKDGVPIE
57		TRUE	PFDSM3638_08315	50S ribosomal protein L13	16.3022	10.5336	1	169.3 (M.score:169.3)	3	26.7606	0.215115	57	MRIINAEGLILGRLASKVAKMLLEGEEVVIVNAEKAVITGNRDVIFKKYKQRTELRTLTNPRRGPFYPKRSDEIVRRTIRGMLPWKTDRGRKAFKRLKVYVGIPKEFQGKELETIIEAHVSRLSRPKYVTVGEVAKFLGGKF
58		TRUE	PFDSM3638_07065	ABC transporter ATP-binding protein	36.1372	6.8032	1	168.9 (M.score:168.9)	4	13.8037	1.22431	58	MPEPILQVRNLTVHFYTYAGIVKAIEKVSFDVYKGETFALVGETGCGKSVTSRALTQLIESPGRIVEGQVLYYRDDGSVVDLLKLSEEEIRKIRGNEIAYIFQDPHASLDPLYTVGHQIAEAMEVHGKISNIKEGIQKAIQILKSVLIPDPERRVKNYPHELSGGMKQRVVIGIGVSNNPRILIADEPTTALDVTVQAQILELLDKMKREYNATIILITHNLGVVAETADRVAVMYAGKIVEIGSVDQIFKNPLHPYTQGLLKAVPNPMTKIEKLEAIPGTVPNLINPPSGCRFHPRCPKAMEVCKQKVPELKEIEPGHFVACHLY
59		TRUE	PFDSM3638_02430	30S ribosomal protein S6e	13.9677	9.88268	1	167.8 (M.score:167.8)	3	35.2	0.23681	59	MATFKLVISDPKSGIAKQVEITGAETEKLIGKRIGDQIPAKELNINLNELFGKEFPEDVKLEIRGGTDKDGFPMRPDIHGPRRVRVLLSKGPGFRPKEKGERRKKTVRGNTISPEIVQVNVKLVY
60		TRUE	PFDSM3638_07935	regulator	18.9724	6.85639	1	165.8 (M.score:165.8)	4	25.9036	1.0758	60	MWGKIEHYFDEYPVRKLIAKTLLRYGLRVSEDMKIKAGEIEVPYTKIAKALNVDRRVVKETVAMILKTPELRDIYMNLEPTVHMKYVGKHVGYGVIEIEPEPRAIGILAKIAQKIAEREINIVQVVAEDPELYPEATLTIITEKPIPGDLINELSKLEGVKRISIY
61		TRUE	PFDSM3638_00545	transcriptional regulator	39.4021	7.11541	1	165.2 (M.score:165.2)	4	13.1965	0.909706	61	MLEEEILQKLQKFGLTKYESLAYLTLLKLGPSKATDVTKESGIPHTRIYDVLSSLARKGFVDIVHGTPRLYAPVNPEIVLEKIREDLISDIERLKKAFQELYREVHGEELPEIWTVHGFENTIDRAQHIIRSAKHDILINTPYEFLEYLRGVLEKRNDVLIIVISNFSEIPLWLRNKNNVILARSGQAPWLLGTWVIGDINYALFFGTLPEDKGKERFYSFWVKSTRLIQNYVHWFYTMYFDNSEIVKPLNYERMEKPLTLSHIRTVITVLKQAGLPRNIEVIGRSLADKKQVTIKGKVIDYEYTPLTANITVKTDNKKIKVGGLGSYLEDIEGESFILLD
62		TRUE	PFDSM3638_04080	50S ribosomal protein L14e	8.9581	10.3466	1	160.8 (M.score:160.8)	3	34.9398	0.881843	62	MPAIDVGRIAVVIAGRRAGQKVVVVDIIDKNFVLVTGAGLNKVKRRRMNIKHIEPLPQKIDIPRGASDEEVRAALEKAGISLA
63		TRUE	PFDSM3638_02195	glycoside hydrolase family 1 protein	49.7283	6.78493	1	159.0 (M.score:159.0)	4	11.8765	1.02177	63	MPLKFPEEFLFGTATAAHQIEGDNKWNDWWYYEQIGKLPYKSGKACNHWEFYKEDIQLMASLGYNAYRFSIEWSRLFPEENKFNEEAFNRYQEIIDLLLANNITPLVTLHHFTSPLWFMKKGGFLREENLKFWEKYVEKVAELLEKVKLIATFNEPMVYVMMGYLTAYWPPFIKSPFKAFKVASNLLKAHALAYEILHGKFQVGIVKNVPIMLPATDKERDKKAAERADNLFNWYFLDAIWSGVYRGAFKAYRVPQSDADFIGINYYTASEVRHSWNPLKFFFDAKLADVSERKTQMGWSVYPRGIYIALKKASKYGKPLYITENGIATLDDEWRIEFIIQHLQYVHKAIEDGLDVRGYFYWSFMDNYEWREGFEPRFGLVEVDYETFERRPRKSAYIY…
64		TRUE	PFDSM3638_08335	30S ribosomal protein S11	14.7199	10.4117	1	159.0 (M.score:159.0)	3	28.4672	0.816455	64	MSEEQVNIKKKEKWGIAHIYSSFNNTIIHITDITGAETISRWSGGMVVKADRDEPSPYAAMLAARRAAEEALEKGIVGVHIRVRAPGGSKSKTPGPGAQAAIRALARAGLKIGRVEDVTPIPHDGTRPKGGRRGRRV
65		TRUE	PFDSM3638_09100	30S ribosomal protein S8	14.6529	9.61555	1	158.2 (M.score:158.2)	3	30	0.518951	65	MTLLDPLANALSHITNSERVGKREVYIKPASKLIGEVLRVMQKYGYIGEFEFIDDGRAGVYRVQLLGRINKAGAIKPRFPVKVSEFEKWEKRFLPAFEFGILIVSTSQGVMSHKEAIEKGIGGRLIAYVY
66		TRUE	PFDSM3638_04470	sulfhydrogenase 1 subunit alpha	48.2852	5.67303	1	157.5 (M.score:157.5)	4	10.7477	1.23101	66	MKNLYLPITIDHIARVEGKGGVEIIIGDDGVKEVKLNIIEGPRFFEAITIGKKLEEALAIYPRICSFCSAAHKLTALEAAEKAVGFVPREEIQALREVLYIGDMIESHALHLYLLVLPDYRGYSSPLKMVNEYKREIEIALKLKNLGTWMMDILGSRAIHQENAVLGGFGKLPEKSVLEKMKAELREALPLAEYTFELFAKLEQYSEVEGPITHLAVKPRGDAYGIYGDYIKASDGEEFPSEKYRDYIKEFVVEHSFAKHSHYKGRPFMVGAISRVINNADLLYGKAKELYEANKDLLKGTNPFANNLAQALEIVYFIERAIDLLDEALAKWPIKPRDEVEIKDGFGVSTTEAPRGILVYALKVENGRVSYADIITPTAFNLAMMEEHVRMMAEKHYND…
67		TRUE	PFDSM3638_05560	hypothetical protein	124.812	4.20448	1	155.8 (M.score:155.8)	4	5.03534	0.983562	67	MRRNAQVFAMVLLLVLSGIPKALALYTPTPFSIDGNLEEWIKADAIAYGRDSGLPGANLDKLYIAWDDNYLYIAIKTNNTQSWDLAYGIGIDVDPGSGNGYTGDSDAWGRKIAFGNNYAIDYEIYFWWSGGSGITADNFINWTGSGWDYKSISDVGGSFAYTGDTSQGLQTLEIAIPWDALGGITRKFAIIAWIAGGDGSSAVDSLPVDDTIVDSDNEWVDQDVFTNLSVIMLSPKNIDGSLDDWADYEKVGSSLPSGYPGADLESLYVSWDSNYLYIAIKTNNTASWDVAYGIGIDVDPGSGNGYTGDTDAWGRKIGFQGFAVDYEIYFWWSGGSGITADNFINWTGSGWDYKSISDVGGSFAYTGDTSQGLQTLEIAIPWDALGGITRKFAIIAWIA…
68		TRUE	PFDSM3638_10380	30S ribosomal protein S15	18.5883	10.4093	1	152.7 (M.score:152.7)	3	18.9873	0.551065	68	MARMHARKRGKSGSKRPPRTAPPIWVEYTVEEIENLVVKLRKEGYSTAMIGTILRDQYGIPSVKLFKDPDNPNRNLTITRILEKHGLAPEIPEDLMFLIRRAVNLRKHLEQHPKDLHSMRGLQLIESKIRRLVKYYKRKGKLPKNWRYDPETAKLLVR
69		TRUE	PFDSM3638_09095	50S ribosomal protein L6	20.8472	8.66717	1	152.0 (M.score:152.0)	3	22.2826	1.22188	69	MPVDAWIREEVEIPEGVEVTVEGYKVKVKGPKGELEREFFWPGIQIFTEDGNVVIYKDFPRRKDVAIARTFAAHIRNMIKGVTEGFTYKLKVVYSHFPISVKVQGDEVIIENFLGEKAPRKAKILPGVTVKVRGQEIIVEGIDKEAVGQTAANIEQATRITKWDRRIFQDGIYIVEKAGKPITF
70		TRUE	PFDSM3638_02475	transcriptional regulator	30.5873	5.55244	1	147.8 (M.score:147.8)	3	14.7727	0.328846	70	MSKDRMVELLQEHFELNLYEARAYVALVAFGVLTPAELASVSEVPAPRTYDVLRSLEKKGFAMTQPGKTNKYRPVHPANVLEKFIQDWQERVKEELEAKKKAKEELLELMAPLIETEVPKYGVERVWVVRGIKNSTLKTKEMLEEAQNEILLADDGFIAVNLEDDIIKAVDRGVKTKILLTKNLLPRLKASKIIDYAKEGKLELRALDKFDLPMLICDEEVFFALEDLAARYFNYETQVWIKDHRVVALFKEKFNEYWEKAEKV
71		TRUE	PFDSM3638_09060	preprotein translocase subunit SecY	52.2656	9.37917	1	146.8 (M.score:146.8)	4	8.11966	0.77876	71	MGARDIIYALERWFPEVERPKRRVPLRERFMWTGVALILYYVLAEIPVYGIPERIQDYFQFLRVVLAGRNGSILTLGIGPIVTAGIILQLLVGSEIIKLDLANPEDRRFYQALQRVFSVFMCFFEAAVWILGGAFGRVGVDVTYAIAVLMILQLAMGGIVLIILDELVSKWGIGSGISLFIAAGVSQTILTRSLNPLTDPNIIDPLTGQPAIVGAIPYFIQHILKGDLWGAIYRGGSAPDMLSVVATIVVFFIVVYFESMRVEIPLGYRGVTVRGSYPIRFLYVSNIPIILTFALYANIQLWARVLDRLGHPWLGRFDPTTGSPISGFVLYVIPPRNIFSVIDNPVRAIVYLILTVIFSLLFGYLWVELTGLDARSIARQLQRAGLQIPGFRRDPRTLE…
72		TRUE	PFDSM3638_05650	TIGR01897 family CRISPR-associated protein	56.2316	5.82011	1	144.8 (M.score:144.8)	3	6.25	1.02394	72	MGMRVLVTTWGNPFQWEPITYEYRGIKVKSRNTLPILVKTLEPERILILVADTMANYYDSGKNKPEIEEKSFSSYSEVVEDTKERILWHIKEEVIEELREEDPELAKKIENMLKDERITIEVLPGVGVFGNITVEGEMLDFYYYATYKLAEWLPVQNNLEVYLDLTHGINFMPTFTYRALRNLLGLLAYLYNVKFEIVNSEPYPLGVSQEIREDTILHIREIGEGVVRPRPQYSPVEGKLYWNAFISSVANGFPLVFASFYPNIRDVEDYLNKKLEEFLVGIEVGEREDGKPYVKREKALDRSFKNASKLYYALRVFNTKFQNYPKKEVPIEEIMEISKIFESLPRIGIILERQVEWLRNLVYGRLWYENGEQKIKKGLLEIIKDKKDKRKEAEALKKG…
73		TRUE	PFDSM3638_04850	pyruvate ferredoxin oxidoreductase	36.2379	9.13233	1	143.8 (M.score:143.8)	3	11.4804	1.51438	73	MAVRKPPITTREYWAPGHAACAGCGCATALRLATKALSEAMEEKYGDPNAFAIAHATGCMEVVSAVFPYTAWKAPWIHVAFENAAAVASGIEAAWKKLGRKGKILAIGGDGGTADIGLQALSGMLERWHNVLYLMYDNEAYMNTGIQRSSSTPYGAWTTTSPPGKYSVGEDKPKKWVALIAAAHQIPYVATASIGNPLDFVRKIKKAGKIDGPAFVQVLCTCPTGWRSPLEKGVEIARLAIETGIWPLFEIENGDIWNIKIQPPGGGAKVYKEGNRVVRIEFKKPIEEYLKLQGRFKHLFKRPEAIEELRNQVKAMWKVLGVEAILPRPEE
74		TRUE	PFDSM3638_05530	homoserine dehydrogenase	34.9765	4.9576	1	142.6 (M.score:142.6)	4	20.625	1.53806	74	MKEVKISIFGFGTVGRALAEIVAENSEVYGIKLKVVSITDRSGTLWGDFDLLEAKEVKEATGKISNIGDYEVYYLKPEEIIEEIRPDIFVDVSSWDDAARVYEFALKEGVSVVTSNKPPIAESYDKLLKASQEGNAGLFFEATVMAGTPIIGLLRENLLGEKIEEIKAVVNASTTFILTRMEQGKTFEEAFNEAKSLGVLEEDPSKDIDGIDAFYKAKILHWVSYGAPPEFEERVGIREVKDARNVRLVAQVSEGRISVKPIKLPENSPLLVEGVQNAAIIKTDNLGEVVLKGPGGGGRVTASGVFTDIIKAALRFPKAR
75		TRUE	PFDSM3638_07850	30S ribosomal protein S7	24.6371	9.96311	1	142.5 (M.score:142.5)	3	20.9302	0.455932	75	MAKPLNERFFIPHEIKVMGRWSTEDVEVRDPSLKPYINLEPRLLPHTHGRHAKKHFGKANVHIVERLINKIMRSGGSHYKVAGHFMRREHRSLNSKKVKAYEVVKEAFKIIEQRTGKNPIQVLVWAIENAAPREDTTSVMFGGIRYHVAVDISPMRRLDVALRNIALGASAKCYRNKMSFAEALAEEIILAANKDPKSYAYSKKLEIERIAESSR
76		TRUE	PFDSM3638_05360	30S ribosomal protein S8e	14.2531	11.519	1	142.4 (M.score:142.4)	2	23.622	0.566181	76	MAIWQGRSLKKPSGGRIVLARKKRKRELGREPSNTRVAEQDKRKIIRTYGGNRKVRLTAAAYANVFDKSGKGRKVRIIRVIENPANRQFARRNIITKGAIIETEIGKAKVTSRPGQDGVVNAILLEE
77		TRUE	PFDSM3638_09070	50S ribosomal protein L30	17.6987	10.2477	1	142.4 (M.score:142.4)	3	25.8065	0.733371	77	MAKLAVIRIRGRVNVKRPVRDTLAMLRLHRVNHCVIVDDTPSYLGMLQKAKDYITWGEINAETLAKLIRKRGRLIGNKPVTDEYVKEKLGMTIEEFAQKVVNGEMSLKDLPNLKPVFRLHPPRGGFRGSKKRSFKEGGALGYRGEKINELIERML
78		TRUE	PFDSM3638_09935	hypothetical protein	27.016	4.83947	1	142.1 (M.score:142.1)	2	10.8333	0.662716	78	MRKISLLVLVVVSSIIVAGCIGGGTSTAEVPKEELYAKLENATTLGVLWNLELLNSTTREVLATSKGKAVIYPNLVLSYRESEGENWISKSVITWENNEGSLILVMTINNTTQKYEDSKEFNVTIARKMAFPGGEIELLLLDNMEFNSTKVETKCDGECVLRIVKEDSKVLYDIQGVWKIEYIEGNVTFDSNTKEISKVEIVMETSQGFIEKIKYEFIKNNLDEAKAEIERIREELKNTS
79		TRUE	PFDSM3638_06255	Na+dependent transporter	57.3993	5.81156	1	140.6 (M.score:140.6)	3	7.88462	1.10723	79	MEQRDRWATKIGLILAMAGNAIGLGNFVRFPTQVAGNGGGAFMVPYFLALFFLGIPVMWVEWVQGRYGGKYGHGTLGPTFYLMARETLKPRGALFFGLIGGALAFATTTLLNSYYLHLIGWSAAYSWFSISGAYFNVENTAEFFASYLSNHGLVFLFWGITVVLLAIAVGQGVSKGIERWVKVMMPLLYIFAIILVIYVFALGSPLGDPNWSTIKGFEFIWSPNWGYLKDHLWEVMLAASGQIFFTLSLGMGIIQNYASYLGPKDDVALSGLATVSLNEFAEVVLGGSIAVPLAVAYAPKIVPEDVLAQGSNAALAWISENFGLGFSYTSLPNIFVQMGTAGRFFGALWFLLLWFAGFTSAIAMYNYLTALLEEDLGISRKTGTWIVFVIYFLLGIPVV…
80		TRUE	PFDSM3638_09210	histone	7.40111	9.04784	2	138.9 (M.score:138.9)	2	37.3134	0.715266	80	MGELPIAPVDRLIRKAGAERVSEQAAKVLAEYLEEYAIEVAKKAVEFARHAGRKTVKVEDIKLAIKS
81		TRUE	PFDSM3638_05715	translation initiation factor IF-2 subunitalpha	31.8971	7.74154	1	137.2 (M.score:137.2)	4	17.4545	4.40556	81	MPRRAREYPEEGELVVATVKRVHNYGAFLDLDEYPGKEGFMHISEVASTWVKNIRDYLREGQKVVAKVIRVDPKKGHIDLSLRRVTQQQRKAKLQEFKRAQKAENLLKLAAEKLGKDFEEAWREVWVPLENEWGEVYAAFEDAARNGIEVLKGYVPDEWLPVLKEIIDSYVEVPTVTIDAEFEITVPKPNGIEIIKEALIKARDRANQEKDIEVKFTYLGAPRYRIDITAPDYYKAEEVLEDIAEEILRVIKEAGGEATLLRKEKRIRKVKKRKK
82		TRUE	PFDSM3638_03005	aspartate carbamoyltransferase	34.7025	6.12078	1	137.1 (M.score:137.1)	3	10.3896	0.975448	82	MDWKGRDVISIRDFSKEDIEIVLSTAERLEKELKEKGQLEYARGKILATLFFEPSTRTRLSFESAMHRLGGAVIGFAEASTSSVKKGESLADTIKTVEQYSDVIVIRHPKEGAARLAAEVAEIPVINAGDGSNQHPTQTLLDLYTIRKEFGKIDGLKIGLLGDLKYGRTVHSLAEALAYYDVELYLISPELLRMPRHIVEELREKGVTVYETSDLMSVIGELDVLYVTRIQKERFPDEQEYLKVRGSYQVNLQVLSKAKETLKVMHPLPRVDEIHPEVDKTKHAIYFKQVFNGIPVRMALLGLVLGVI
83		TRUE	PFDSM3638_05580	hypothetical protein	22.082	6.36346	1	136.9 (M.score:136.9)	4	18.3673	0.601494	83	MVRRRGAYPEYTLEDALAVLFLAKEPIGRKQISEILELGEGSVRTLLGRLTKKDLIRSKQRGHFLTTWGHEVKKKIEELFSEPIEVTVDGFPGVAIIVKNPGGFKSLELRDEAIKFDAKGAMILTVKNGEIVFPEDSRPLKEMYPEIVKRLYDYEEGDLIVITWADKIGRALKAALHVAVVLKGDQLPREILEVAE
84		TRUE	PFDSM3638_07185	NADH-plastoquinone oxidoreductase subunit	15.6752	8.74482	1	131.6 (M.score:131.6)	3	24.4604	0.999601	84	MIRLPLLPTVIKNLFKKPATNPFPKTEPVPVPEDFRGKLVYNVDKCVGCRMCVTVCPAGVFVYLPEIRKVTLWIGRCVMCKQCVDVCPTAALQMSDEFLLASYDKYDAKLIYLTPEEAEDIKKKLEEANKAKAEKQASK
85		TRUE	PFDSM3638_03365	methylmalonyl-CoA epimerase	13.5676	9.24651	1	131.2 (M.score:131.2)	2	11.8644	0.287738	85	MSQLLEGLYITILGIVVVFSVLAILAIVMDLIGRTERKLVEKEKKKEVEDKKVEPVKVEKKLDEKKIAIITAAILAYLRGKQPKEVPIKRKPSPNWWLSGLITQMEEVENFNYEIGKW
86		TRUE	PFDSM3638_09365	DUF655 domain-containing protein	24.2949	9.07049	1	131.0 (M.score:131.0)	3	15.122	0.205189	86	MDYHRRHPYHHSIKKKMNVEYEEYAYVLDYLPNGYPDLRTGHYLGKPVAQVIGEKAFTLLEVTPKVDLMLYERVYVGKGERDKVLKINKKLTYDELTDTAKAELPYVLEEIVKNNEDRFVKFFNIAPPITNRLHSLELLPGIGKKHMWEIIEEREKKPFESFEDLKKRVKGLPDPVKMIAKRILEELQGKDKYRLFVGSNRIFRE
87		TRUE	PFDSM3638_01185	transcriptional regulator	16.9754	9.02306	1	128.8 (M.score:128.8)	3	21.3333	1.10221	87	MAELLDRTDKMLLEELKKNARENIAALSKKLGIPRTTVHYRIKRLLEEGIIEKFTIKPNYKKLNLGTTAFVLIRYDPDSGLTQKEVAEQIAKIPGVYEVHIVAGEWDILLKVRAANAEEVGKIVIEKLREIKGVGQTVTMVSFVTIKEEI
88		TRUE	PFDSM3638_09125	50S ribosomal protein L14	15.2274	11.3435	1	128.1 (M.score:128.1)	3	34.0426	1.11015	88	MAKKGAGATRGVSAVRPTRALPVGAYLTVADNSGAKVIQIIGVVEYHGTRRRLASAGVGDMVVATVKKGRPDMRHQVVRAVIIRQRKEYRRLDGMRVKFEDNAAVIVTPEGVPRGTEIRGPVAREAAERWVRIGSIASIIV
89		TRUE	PFDSM3638_08705	4-demethylwyosine synthase TYW1	39.2279	6.87295	1	127.5 (M.score:127.5)	4	14.2012	1.30823	89	MDIKPGKITVQANPNMPEEIANLFRKQHYELVGRHSGVKLCHWLKKSLTEGRFCYKQKFYGIHSHRCLQMTPVLAWCTHNCIFCWRPMETFLGTEVPEPWDDPAFIVEESIKAQRKLLVGYKGNPKVDKKKFEEAWEPKHAAISLSGEPMLYPYMGDLVEEFHKRGFTTFIVTNGTVPESLREMIKDDKLPTQLYVSLTAPDIETYNKVNIPMIPDGWEKILEFLELMRDIPTRTVVRLTLVKGENMHNPEGYARLIMKARPMFVEAKAYMFVGFSRNRLTINNMPSHEDIREFAEALVKYLPGYHIEDEYEPSRVVLIMRDDVDPSGTGLEGRFIKH
90		TRUE	PFDSM3638_05690	protease	31.7821	7.08176	1	126.9 (M.score:126.9)	3	14.8789	0.669403	90	MGIGLWVRTGLLMAFLTGLLVGIGYLIGGQGGMIIAFTIALFMNFFSYWFSDSIVLSWYNARIVSEEEAPELHRIVEKLAMQAGIPKPRVAIVPTLVPNAFATGRSPEHAVVAVTEGLLRILNRDELEGVIAHEISHIKNRDTLIQTIAAVLAGAIMVLVNFARWSLWFGAYDEDRDGGNIVALILAIILAPIAATLIQLAISRSREYLADETGAKISGKPHALASALMKIEEAVRYRPLKNGNPATAHMFIVNPFRGVDFVELFSTHPPTEKRIERLRKIAMEMGIIF
91		TRUE	PFDSM3638_05240	hypothetical protein	45.8191	5.57626	1	126.5 (M.score:126.5)	4	11.0837	1.56743	91	MSIVTSIQALDRILGGGIKENCNIALVGSIDNDYVLLMHQIVNSILSQGKKVLLVEFREDPNSLLEWLKDYGIDYAQYMERKQLRILDGFTNVYSQTQVSKPDILPNPLDLSITSAIIRDAVSKEKYDFVVLDDITTLYPLQPDPRGYIRVTIRLVNSLKSRGASVIGGINKDVLPIQDLTMILIPFEYVVEVMNGIIRVKRSYSPLTTPIEGINYVKSKKGIVDVESAFNNVYQMRDSITLKEDGSLMLGNLRVQIIDEFSEASLIKFVYMYLGPEKGKEFLYKWGKFESKELKLPKSSKEKARQILEDMFTTTKITGGGILNFVSFEDDIIVIEGKNLFPRLKNFPYPAHVNYAGSIAGIVEKLLGGEWKGDEISCESQGHEKCLFVIRKVSDSKSS…
92		TRUE	PFDSM3638_07910	RNA-binding protein	30.4881	4.66953	1	126.1 (M.score:126.1)	4	24.5487	0.823949	92	MSNDEIVAGIMRDYILNLLKEKKRIDDRGFEDYRPIEVEVGVIEKAEGSALVKLGNTQVLVGIKATLGEPFPDTPNMGVMTTNVELVPLASPTFEPGPPDERAIELARVIDRGIRESRALNLEKMVIAPGKIVRVVFIDVHVLDHDGNLMDAIGIGAIAALLNARVPKVLYNEETGEVEILEEKEPLPVEKIPIPVTFAKIGNYLVVDPTLEEEQIMDGRLTITTDETGHISAVQKSEGGAFKLEEVMYAVETAFKKAEEIRKIILNALEKANNSEE
93		TRUE	PFDSM3638_07915	exosome complex exonuclease Rrp41	27.83	8.93505	1	125.2 (M.score:125.2)	3	14.8	1.02412	93	MMLKPEGLKLIDENGRRLDGRKKYELRPIKMKVGVLKNANGSAYIEWGKNKIIAAVYGPREIHPKHLQRPDRAILRVRYNMAPFSVEERKKPGPDRRSIEISKVIRGALEPALILEMFPRTAIDVFIEVLQADAGTRVAGITAASLALADAGIPMRDLVAACSAGKIEGEIVLDLNKEEDNYGEADVPVAIMPIKNDITLLQMDGYLTKEEFIEAVKLAIKGAKAVYQKQREALKEKYLKIAQEVEGSEQ
94		TRUE	PFDSM3638_09110	50S ribosomal protein L5	21.2173	9.59184	1	125.0 (M.score:125.0)	2	15.0538	0.628465	94	MAVEIPNKEQILADWEAHPMRRPRIEKVTINIGVGESGERLTKAEIMLQQLTGQKPIRRKAKKTNRDFGIRRGEPIAVKVTLRGPKAYELLKRLLAAVDNRLKASSFDEHGNVCFGIEEHINIPGVEYDPEIGIFGMDVCVTLERPGFRVARRKRKRAKIPTRHKLTKEEGMVYMMEEFGVEIVEG
95		TRUE	PFDSM3638_06050	ABC transporter substrate-binding protein	71.5616	5.18031	1	124.8 (M.score:124.8)	3	8.36013	1.84052	95	MKRLVGVLIGAFVIFGVFGQVVAAQEQELPREETLYVGGGLWSQPNNFNPLIPWSAVTGTIGLIYETLFNYDPLNDKLEPWLAESGRWVSDNVYEVKLREGLTWQDGKPLTAEDVKFTFELHKKYPGLAYHQMWEWLQEVKVIDDRTIQFVFSTPHYEEWKYLLYQIAIVPKHIWQNIDNPVEFANVDNPVGSGPYKLYKTDQMRFILVRNDNWWGIKYFGKPAPKYIVYVIVYSNNLALSMLVKGELDWSNFFIPGVPDVKAQYGIVTWYDEPPYHLPANTAFLFLNTQKPPLDNPEFRRAIAYAINPEEIAARASQNQVTPADPTGLLIQYPAFKKIYNKEAVDKYGFKYDPQKAMEILDKLGFKDVNGDGYREFPDGKPLKLTIIVPFGWTDWMEM…
96		TRUE	PFDSM3638_08285	30S ribosomal protein S2	22.9924	9.298	1	124.6 (M.score:124.6)	2	12.8713	0.374529	96	MADEYLVPLDQYLAAGVHIGTQQKTKDMKKFIYRVRQDGLYVLDVRKTDERLKVAGKFLAKFEPQSILAVSVRLYGQKPVKKFGEVTGARAIPGRFLPGTMTNPAVKNFFEPDVLIVTDPRADHQAMREAVEIGIPIVALVDTENLLSYVDLAIPTNNKGRKALALIYWILAREILYNRGEIQSREDFKIPVEEFEMKIVRR
97		TRUE	PFDSM3638_02235	glutamine synthetase	50.1514	5.20904	1	122.5 (M.score:122.5)	3	9.79499	1.40483	97	MNISVSMNKFDSKIKFVQLVFVDINGMPKGMEIPASRLEEAVTDGISFDGSSVPGFQGIEDSDLVFKADPDTYVEVPWDNVARVYGFIYKDNKPYGADPRGILKRALEELEKEGYKAYIGPEPEFYLFKKNGTWELEIPDVGGYFDILTLDKARDIRREIAEYMPSFGLIPEVLHHEVGKAQHEIDFRYDEALKTADNIVSFKYITKAVAEMHGLYATFMPKPLFGFPGNGMHLHISLWKDGENVFMGEEGLSEIALHFIGGILKHAKALTAVTNPTVNSYKRLVPSYEAPVYISWGYRNRSALIRVPAFWGKGARIEYRCPDPSANPYFAFAAVLKAGLDGIKHKIDPFAYVEENVYEMSEEKRKELGIETLPGSLGEALEELEKDKVVKEALGDAYK…
98		TRUE	PFDSM3638_09900	tetratricopeptide repeat protein	39.2778	4.47941	1	120.3 (M.score:120.3)	2	6.58683	1.53504	98	MVEEKIKEAIKNRDCETILELLDEYLEQIEDEEKLREALKEIGEAAVECEDFDIIHEISHLYEHLGEPEKGIELYKKIVERRKGDKEKYAEALYYLAEEYEHMGMPEEALKIYQELLEIEKELGNEREIALTLANIAVVKDELGEADEAIKLMSEAKDIFEKINDTKNYHIALIDLAHFYYELGEYEKAMQIIEEVLRNPLDDEIEVHGRLVESEIHSALENYKKAALSLRNALLRSGDDEYLFETAFEAVLEFIEELYNEEKYAELKEVASLFAELFEDDTKFFFQAIEKLAEWKLGKEEAKKEFEELYNKIENEEMKEFLDELKKPKVNLSL
99		TRUE	PFDSM3638_03975	glycosyltransferase family 2 protein	34.5909	9.68861	1	117.4 (M.score:117.4)	2	6.95364	0.658016	99	MYKGYKIGVAVPAYNEEKLIGETLKGIPPFVDRIYVVDDASKDNTSKVVEEMMRHDKRIVLIRHAKNKGVGGAIVSGWKKGLEEGMDILAVMAGDNQMDPRDLPALLDPIVEGKVDFTKGNRFLLSYDLKMSYWRRFGTFLLTILTKIASGYWHINDPQNGYVAIKADALRKIDLDKLDSGYFFENDLLIKASVANLRVVNVPVKIRYKIGEKSKIKYSKFIARTSWLLLRSFLWRIWVEYVKRRKFLGFLYLLGFTLIVTSFLIFLIYPTRLEIPLIVLLAGAAIFLGSCIKEKNLKQYLK
100		TRUE	PFDSM3638_06325	methionine synthase	39.2905	5.92222	1	117.0 (M.score:117.0)	3	14.497	0.869347	100	MELPILPTSVIGSYPKPRWLLRMYKLRELGKIPEEDFKEAVRDASISVLREHERAGIDIPWDGEMGRSEMTEYFTSKIKGFKFYGPVRVWGNAYFNKAAAVDKLEYEEPLVLDEFLWVKENTTREIVKIPITGPYTIAEWSFNEYYPDKESFVMDLAEIINKELKVLEKHGAKFVQLDEPAMLNHPSEVPLAVDAINRAVKGIKMKVGLHVCYSNYNLLADYFDEIKVTQFALEFANRNFRDMDFLKKLSNKELGFGVVDVHNPRVESVEEIRQAIKKVFTYLEPEWVYINPDCGLKLLDRKIAYQKLVNMVQAVRGVRKELEKEGKTTIEFRTLKDI
101		TRUE	PFDSM3638_06820	50S ribosomal protein L7ae	13.3862	5.35131	1	113.6 (M.score:113.6)	2	14.6341	0.988638	101	MAKPSYVKFEVPKELAEKALQAVEIARDTGKIRKGTNETTKAVERGQAKLVIIAEDVDPEEIVAHLPPLCEEKEIPYIYVPSKKELGAAAGIEVAAASVAIIEPGKARDLVEEIAMKVKELMK
102		TRUE	PFDSM3638_10010	hypothetical protein	15.5083	5.51868	1	113.4 (M.score:113.4)	3	24.8175	0.735088	102	MAILGHNIIRVEFEKNPVPGGQVEVSLNPKIEELRLGEINLPNGKVKGIEVELTYNIIYSPEVGKGMIRMIVFYLPRNREDVDNILDNWEKEKKLPGELVAEVVNFANNLLIPFAMMITKEMGMPSPIPIPRVVVRQ
103		TRUE	PFDSM3638_06260	alkaline-shock protein	27.8791	9.58201	1	111.1 (M.score:111.1)	2	12.7049	1.55566	103	MKSPEILKEVSENLIKTIEKLEKVKVFEEKRKRKLISLLEEASGNFLKLSGEVENDNVQMAEFLRKRSVEIKNNTNDKAIERMGEKEYIKAVEKMNLYSKTAFYDFKPTMLRKLKKAYRSFIFGMALYFVLAGLSTRPELAVTALILAIPAILSMLSLQRRGYTGLMLAYAVAPIPMIQSPMLIRMFYGVLRDPEAIRTAAEYLGKSETFIVVYAYVVIILSIVDFALLAYGLYGLTKHRHAFL
104		TRUE	PFDSM3638_08140	hypothetical protein	9.80618	4.72956	1	110.6 (M.score:110.6)	3	37.037	1.64191	104	MNPLWIIVLVSLVLNIVFIMLYVSARRNPYYIVYDEETKSQLKRRVLHLKEDLESELEEFDVTEWERQLEKSLEEEIKGLQ
105		TRUE	PFDSM3638_09735	sugar transporter	45.1264	8.46209	1	109.8 (M.score:109.8)	2	6.50602	1.10403	105	MRRDELIKSGIMTFLAIVVMFLILFPVYYIFTVSIKPAATIATTELDLIPDKVTGEAYGEVLFGLKGTRISEEFTGTLEGSAKIVGGKLQVENGVIKGEVKYGPFTGIRFEVPVSGLSFELSQQVNEVQGNLKAEISGIISLTRVNSDGTIGLGVIKNVTLKSGEVNGLKISEGKLAGFIRIRDSGKAELTAIGKFVNSKFFHHLRNSLILATLTVFLTLLFVVPAAYAFSRLKFFGREHILYFYLMFTQVAGGLGIAGLIALYGMLVKLGLYNKLPALAIIYAAGSVPFNTWLLKSYIDSISPDFDEAALVDGASYLQIIRYVLLPMALPGIATVAVMSFIGGWTEFILASLLLTEENQPLSVWIYTLMGGIGRGIDWNYFAAAALLFALPVFIMFML…
106		TRUE	PFDSM3638_04350	NDP-sugar synthase	47.1908	5.11814	1	107.2 (M.score:107.2)	3	8.47458	1.04563	106	MKAVILAGGFGTRLRPISSTRPKPMVPVLGKPNLQYILEALEKVSEIDEIILSVHYMRGEIREFIQERMVDYPKDIRFVNDPMPLETGGALKNVEDYVSDDFLVIYGDVFTNFDYSELIKAHKENDGLITVALTKVYDPERFGVVIVDEEGKIIDFEEKPRKPKTNLVDAGIYMVNKEVLKEIPKNKEVYFEREILPKFVSQGLVYGYRMPKEYYWIDLGTPEDLFYAHQIALDQLSRENGYMILGENVEIPEDVEVQGPVYIDNNAKIGHGVKIKAYTYIGPNTIIEDKAYIKRSILLGSDIIKERAELKDTILGEGVVVGKNVIIKENAVVGDYARINDNLVIYGAKILPWKKVEEYEAYIRIKLDPTKVRPELTPERCPLGLPECIYKKFKAIAGE…
107		TRUE	PFDSM3638_06300	translation initiation factor IF-5A	15.4351	5.16695	1	107.0 (M.score:107.0)	2	20.2899	0.842641	107	MGDKTKVQVSKLKPGRYIIIDDEPCRIVNITVSSPGKHGSAKARIEAVGIFDGKVRSIVKPTSAEVDVPIIDKRTAQVIAVTPDTVQIMDMETYEMFEVPLDTGVEEEIKDKIKEGINVEYWETLGRIKIMRIKGEEE
108		TRUE	PFDSM3638_00500	proteasome-activating nucleotidase	44.7769	6.02818	1	104.2 (M.score:104.2)	2	6.81818	0.488777	108	MSEDEAQFHGNYDDYVTYLKRRIRQLELQVRMLEADKERLERELSRLRSEMSRLRQPPAFAGSVIEVLDDDRAIVQNYNGPRFVVRIAPWIDKSKLRPGTRVALDQRTMAIIEILPASKDPAVLGFEVVERPNVTYNDIGGLKKQLQELREAIELPLKHPELFEEVGIDPPKGVLLYGPPGCGKTLMAKAIAHEVNATFIRVVGSELVRKYIGEGARLVHELFELAKEKAPTIIFIDEIDAIGAKRLDETTGGEREVNRTLMQLLAEMDGFDPRGNVKVIAATNRPDILDPALLRPGRFDRLIEVPLPDFEGRLEILKVHTRRMKLRGVDLRLIAELTEGASGADLKAIATEAGMFAIRERRTYVTQEDFLKAIDKVLGNEKKIIQQIMSHEVIYG
109		TRUE	PFDSM3638_09290	TATA box-binding protein	49.2393	6.00286	1	103.9 (M.score:103.9)	2	7.25624	1.28005	109	MPVIEEIPTVKFERVGMHSHIKGLGLDENGKAKFIGDGMVGQVKAREAAGIAVKLIKQGKLAGKGILLVGPTGSGKTAIAMGIARELGEDVPFVQISGSEIYSAEMKKTEFLKQALRRAIGVRISEERKVYEGKVEKIEIRRTRHPFNPYIEIPESVVLTLKTKDDSKTIRAGREIAYQILEMGIEEGDVIQIDAETGRVSRIGTTKEEEGLFFRKKVEMPTGPVLKIKEFTYTVTLHDLDVVNARAGGIFSLLFGGRMEINDEIRERVDQTVKQWVEEGKATLVPGVLFIDECHMLDIEAFSFLARAMESELAPILILATNRGMTKIRGTDIESPHGIPLDMLDRLLIINTEPYKKEEIREIVKIRAREEKIELSEEALEYLAELGEQTSLRYAVQLL…
110		TRUE	PFDSM3638_06240	hypothetical protein	81.5928	4.93656	1	103.6 (M.score:103.6)	2	3.14208	0.165274	110	MKRFFAFAMVLLFLLSALPVFGAQEYVKKVSVFSGHLKEDQKLQINEYLIRIEFGIDGSPYVIIEANNSIKEILKADFGAEVETGNLIVSCGSYDAEKGLFIVVLWKAIGEEYKVEKGSFVKNFEVLEVNSTEITIERGTSVFYIKANESVKVDKYILEFTGKSLVIYELPQVTVKGEKTFEISVSFPYKEVVAKPGDVLSFPIVIENRGDNSTVISLEFLRIPKDWSAEFLYQGIAVRSIEIPKKSAVTLTLNVQIPEEYSGREIIEFKVNSEVHRVVIDVKGETRKGKVEVITSIISQDAEAGEEIKFPLVIQSTIEANVSVEIGVPEGWDAHSLYMGSRVSMIHLSEEDSKTLEISLDVPRGADLGRYEIPVTLSISGNEYSETKVVTFFVNIYKT…
111		TRUE	PFDSM3638_07370	radical SAM protein	45.238	8.82098	1	100.4 (M.score:100.4)	3	8.41837	2.43505	111	MRFSPIIGPSSYVSSLCHSILRGELFSTCSVGCIYCYARWYRGAHGKEKPLWESLKLIKMLGGIIREGLAITPIRVSTLSDPFQGEGKITLKFLKLALKEKVPVIINTKLIPREKHIKTIERLAEEGLVVVQVSLPTLEETKVLEPFSPSPGQRLELIERLSRAGVPTIVRVQPFVPGWIRDIHTFIEEIASAGARMIILEFLRIEKELLPLFSKLFPGEDIYKREWESYLPGTSTEEAPLLHPPLDYRLSIAREFSIKAEKEGLAFSTCKEGLFEFHTPLNVDCCGMAFFDVEYISRRPTLWDLYLEIVENGKAKGEDLWERCRREELLCRENLTPYPRWFRRGFIAHEKRLESVLRKPHIVERITPSIKYENGYFIKRKERSNSGYNSFF
112		TRUE	PFDSM3638_09170	50S ribosomal protein L23	9.86955	9.69534	1	100.2 (M.score:100.2)	2	24.4186	1.02686	112	MDPYKVIIRPVVTEKAISLIEKENKLTFIVDRRATKQDIKRAVEEIFNVKVEKVNTLITPRGEKKAYVKLKPEYSASEVAARLGLF
113		TRUE	PFDSM3638_03375	sodium ion-translocating decarboxylase subunitbeta	42.2339	6.9239	1	98.9 (M.score:98.9)	1	4.5	0.215113	113	MGLEQAVVDFFNHMGLLNLTVGNVVMIIVGLTLVYLAIRYEMEPLLLLPIGISAVLVNLPLSHMANWPLAPQLPPEIQENIFATISYLSQQYGPPGLFDLIYYLLIKTEVVPLLIFFGLGAMTDFGPMIADPKTALLGAAAQIGVFVAMLVALALGFNLKEAASIGIIGGADGPTTIYLTTKLAPHILSATAVAAYSYMSLVPLIQPPVIKALTTPEERRIRMEQLRPVSKREKILFPIASMIVIGLLVPSAAPLIGMLMIGNLFRESGVVQRLSKAAQEELMNIVTIFLGLGIGSTMRAESFLTPKTLMILALGVVAFASATAGGVLFGKIMMKISGGKINPMIGAAGVSAVPMSARVVQRLASEEDPGNFILMHAMGPNVAGVIGTAVVAGVFLSALG
114		TRUE	PFDSM3638_00615	lysine--tRNA ligase	61.0154	5.80569	1	98.7 (M.score:98.7)	2	4.78011	0.354436	114	MVHWADYMAEKIIKERGEKEEYVVESGITPSGYVHVGNFRELFTAYIVGHALRDRGYNVRHIHMWDDYDRFRKVPKNVPQEWEEYLGMPVSEVPDPWGCHDSYAEHFMGLFEEEVAKLEMDVEFLRASELYKKGEYAEEIRKAFEAKGKIMAILNKYREVAKQPPLPENWWPAMVYCPEHRKESEIIDWDGEWGVKYRCPEGHEGWTDIRDGNVKLRWRVDWPMRWAHFGVDFEPAGKDHLAAGSSYDTGKEIIREVYGKEAPLTLMYEFVGIKGQKGKMSGSKGNVILLSDLYEVLEPGLVRFIYAKHRPNKEIRIDLGLGLLNLYDEFDRVERIYFGIEKGKGDEEELKRTYELSVPKKPKRLVAQAPFRFLAVLVQLPHLSIEDIIFTLVKQGHVP…
115		TRUE	PFDSM3638_07280	radical SAM protein	68.6769	6.33099	1	95.5 (M.score:95.5)	2	4.42177	1.06738	115	MAENLSAGEVPSGEKEFEALTKRMREIIEFPEISEEEFEEMLKNANRGYGEPLPHRTYSLCPESRRVVPAVVWEKDGMVWITKKCPEGIITDLYSEDVDLYYRFLRWKFEDKKLFSVNVPNTGINCPFDCGLCARHRSHTNLLNIVLTNRCNLSCWYCFFYAREGEPVYEPTLEQIRMMLRNAKKENPIGANAVQFTGGEPTLRDDLIEIIKIAKEEGYDHVQLNTDGIRLAFEPELVKKIREAGVNTLYLSYDGMTPQTNWKNHWEIPLIFENVRKAGGPGIVLVPTLIRNVNDHEAGAIINFGLNHLDIVRGVNFQPISLVGRVPKKERQRFRITIAGAIKKIEEQTNGAISRDDWYPIPIAGYIARFFEAFTGKHYYMTSHYACGAATYVFLDKEE…
116		TRUE	PFDSM3638_09130	30S ribosomal protein S17	13.26	9.71082	1	95.5 (M.score:95.5)	2	20.354	0.849299	116	MMRDIGLRVQPPAEKCDDPKCPWHGNLKIHGRVFEGIVVSDKPRKTVTVERQYYFYLNKYERYELRRSKIHAHNPPCINAKVGDKVLIAETRPLSKTKHFVVVAVLERAEERR
117		TRUE	PFDSM3638_08310	30S ribosomal protein S9	15.2792	10.3465	1	95.4 (M.score:95.4)	2	21.4815	0.321537	117	MRIIQTTGKRKTAIARAVIREGKGRVRINGKPVEIIEPEIARFTILEPLILAGEEIWNSVDIDVKVEGGGFMGQAEAARMAIARALVEWTGDMSLKEKFMKYDRTMLVGDPRRTEPHKPNRSTKGPRAKRQKSYR
118		TRUE	PFDSM3638_00700	TIGR00266 family protein	23.4064	5.68563	1	95.0 (M.score:95.0)	3	16.4384	0.984397	118	MKYKIEHRPSFSLLEVELDAGESIQAEAGAMVYMDPTVEIVTKAKGGLLGALKRSILGGESFFVNIFKGPGKVGLAPGYPGDIIGLEVNGKLYAQSGAFIAASEDIDIDVKLGGIKTVIGREGLFLLELRGRGIAFLSSYGGIQKISLRGESLIVDTSHLVAFTEGIDFTIKTIGGLKSTLFGGEGFVFEFRGTGDVYIQTRSLDGFLSWLLPHLPSSR
119		TRUE	PFDSM3638_09145	50S ribosomal protein L29	8.52384	10.326	1	94.9 (M.score:94.9)	2	36.1111	0.626338	119	MKPSEIREMSIEEIDAKIRELRLQLAKERGLLTMGTSLENPMVIRNLRRDIARLLTIKKEKLREREKGKVKK
120		TRUE	PFDSM3638_07855	30S ribosomal protein S12	16.4283	10.5509	1	91.5 (M.score:91.5)	2	14.966	0.746539	120	MPGKKAPNGEFAGRKLKLKRKKFRWSDIRYKRRVLRLKEKSDPLEGAPQARGIVLEKIAVEAKQPNSGMRKAVRVQLIKNGKVVTAFCPGDGAIKFIDEHDEVIIEGIGGPKGGSMGDIPGIRYKVVKVNRVSLKELVKGRKEKPRR
121		TRUE	PFDSM3638_08135	septum site-determining protein MinD	27.4402	5.72334	1	91.4 (M.score:91.4)	2	11.1969	0.816778	121	MEGRSIVFASGKGGTGKTTTVANIGVALAQFGKEVILIDADITMANLSLILGMEDIPITLHDVLAGEAELKDAIYEGPAGVKVIPGGLSLEKVKKARPERLRELIKEISQMGDFILIDAPAGLELTSVTALLIGKELIIVTNPEISAITDSLKTKLVAEKLGTLPLGAILNRVTSEKTELSKEEIEAILEVPVIGIVPEDPEVKRASAYGVPLVIKNPTSPAAIAYKQIAAKLAGIKWTPPEPESPVKRIFKALFGGKR
122		TRUE	PFDSM3638_08740	hypothetical protein	51.0377	5.69962	1	90.7 (M.score:90.7)	3	8.18584	0.983506	122	MKRKKTVIHQLISEKQRFEKAKEGGNMAAKDDFGTTKYIIHAEFEANGVVERPDVVGAIFGQTEGLLGDDLDLRELQKTGRIGRIKVEVHTKAGKTYGTILVPSSLDRVETAIIAAALETIDRVGPCEAKIRVIKIEDVRATKRKYIIERAKEILETLMEEEIPETQELVEEVRKAVREMELIEYGPEKLPAGPHVPFSDSIIVVEGRADVLNLLRHGIKNAIAVEGTSIPETIIKLSKERIVTAFTDGDRGGELILKELLQVADIDYVARAPEGKEVEELTKKEIIKALRSKVPAEQVINELFNKGKSFYEIVKEREKEEEDERARKQEYTEEKESLKPQPQVQPNEKIVKPLKVLKPDYKEFEEFIEKVKNDSIALLIDENKNIIKEVPIRDMLSAI…
123		TRUE	PFDSM3638_09415	50S ribosomal protein L35ae	9.72948	10.6203	1	90.0 (M.score:90.0)	3	47.1264	1.63622	123	MRIKGVVLSYRRSKENQHNNVMIIKPLDVNSREEASKLIGRLVLWKSPSGKILKGKIVRVHGTKGAVRARFEKGLPGQALGDYVEIV
124		TRUE	PFDSM3638_08345	30S ribosomal protein S13	16.9042	10.8991	1	90.0 (M.score:90.0)	3	22.973	0.329014	124	MANFRHIVRVAGVDLDGNKQLRWALTAIKGIGINFATMVCRVAGLDPFMKAGYLTDEQVKKIEEILADPVAHGIPRWAVNRPKDYETGRDLHLITAKLDMAIREDIMRLRRIRAYRGIRHELGLPVRGQRTRSNFRRGQTVGVSRKKK
125		TRUE	PFDSM3638_01495	ABC transporter ATP-binding protein	27.2376	6.68678	1	89.4 (M.score:89.4)	3	17.9592	0.750164	125	MKAIVVEDLEKDYGKVKALKGISFEVKEGEIFGLIGPNGAGKSTTLKILATLLVPTGGRAEIFGYDVVEEAEEVRKLISYLPEEAGAYKNLTGYEYLEFMAKLYAKTGKDYKKMLETGVELSGLGERLKDRISTYSKGMTRKLLLARALMVEPKLAILDEPASGLDIINAYSIRQTIKQFAREKGITFLLSSHNMLEVEFLCDRVALINKGRIVEIGTPKELKEKYNAENLEEVFMSIVGGKKVE
126		TRUE	PFDSM3638_09390	topoisomerase	33.1244	4.65992	1	89.2 (M.score:89.2)	3	14.1869	2.18199	126	MTIVDVRILVEGASDVEVVSKALQGLALGSEYNITISSIIPTTNVEIAKSAAAGADLLIIATDADRVGRELAERLFTELSEMVGHIERMKLPLGHDLEHVDVELVRKELRNALVRAGLKTLQRIPEYMELRRDYLDLKGKYEEIEKEKEDLLQKIEELKAKLEEIEEEYARVKEENLELRELLKKRAKVYKLEEKWKEMFPGIKMPSIDIFSRAIETLGFAGKIIVGQGHVYAEDDHILEQLFKTVYLSLQLTQSIEREEENIEVIEGEEEKLEEEVEVIENEGENIEE
127		TRUE	PFDSM3638_06875	translation elongation factor EF-1 subunitalpha	47.6053	8.68736	1	88.6 (M.score:88.6)	3	10.7477	1.10596	127	MPKDKPHVNIVFIGHVDHGKSTTIGRLLYDTGNIPEQIIKKFEEMGEKGKSFKFAWVMDRLKEERERGITIDVAHTKFETPHRYITIIDAPGHRDFVKNMITGASQADAAVLVVAATDGVMPQTKEHAFLARTLGIKHIIVAINKMDMVNYNQKRFEEVKAQVEKLLKMLGYKDFPVIPISAWEGENVVKKSDKMPWYNGPTLIEALDQIPEPEKPVDKPLRIPIQDVYSIKGVGTVPVGRVETGKLRVGEVVIFEPASTIFHKPIQGEVKSIEMHHEPLEEALPGDNIGFNVRGVSKNDIKRGDVAGHTTNPPTVVRTKDTFKAQIIVLNHPTAITVGYSPVLHAHTAQVPVRFEQLLAKLDPKTGNIVEENPQFIKTGDAAIVILRPMKPVVLEPVK…
128		TRUE	PFDSM3638_07060	ABC transporter permease	43.0606	9.26115	1	87.9 (M.score:87.9)	2	5.74413	2.07984	128	MQEEYKKSILDKLADKFVYGLGKFISLFKKGWMEKNRSKLEEWRLMLYALNRSPPALIGLFLVMIFIFLGIFGPYLAPWKYNFMPTLYTSNYDQVYLVPPGSKAVLEYYNNAVITYPLGSDHYGRDLLSLILQGARTSFVISIIVIILGVPLGIILGLIAGYYGGKIDELIMRITDMFLSFPALILAIALSAVLPERLQEFISAHPILEKIVLAIFALDQREAGNLGRLLAVIVAMIIVWWPGYARITRGSTLAEREKLYIEAARAIGLPTRTILFKHILPNIIGPILVYITLDFGSVVLMEAGLSFLGLGATPPIADWGRIVYDGAQYFPRCWWLVFYPGLVVLLTALGWNLLGDGLRDILDPKTRRSIEFKVKKKEGEKSA
129		TRUE	PFDSM3638_08975	RNA-guided pseudouridylation complexpseudouridine synthase subunit Cbf5	38.5366	7.87399	1	87.1 (M.score:87.1)	3	9.70588	0.917395	129	MARDEVRRILPADIKREVLIKDENAETNPDWGFPPEKRPIEMHIQFGVINLDKPPGPTSHEVVAWIKKILNLEKAGHGGTLDPKVSGVLPVALEKATRVVQALLPAGKEYVALMHLHGDVPEDKIIQVMKEFEGEIIQRPPLRSAVKRRLRTRKVYYIEVLEIEGRDVLFRVGVEAGTYIRSLIHHIGLALGVGAHMSELRRTRSGPFKEDETLITLHDLVDYYYFWKEDGIEEYFRKAIQPMEKAVEHLPKVWIKDSAVAAVTHGADLAVPGIAKLHAGIKRGDLVAIMTLKDELVALGKAMMTSQEMLEKTKGIAVDVEKVFMPRDWYPKLWEKRDRS
130		TRUE	PFDSM3638_03210	hypothetical protein	13.387	6.35213	1	85.9 (M.score:85.9)	2	9.16667	7.01179	130	MGGWIRNIGRYLSYLVDDTFEEYAYDVVDGIAKARTQEELLEGVYKALRLAPKLKKKAESKGCPPPRIPSPEDIEALEEKVEQLSNPKDLRKLAVSLALWAFASWNNCPKKGKGTEGGVE
131		TRUE	PFDSM3638_04880	pyruvate ferredoxin oxidoreductase	20.0089	5.42661	1	85.9 (M.score:85.9)	2	16.7568	0.717618	131	MIEVRFHGRGGQGAVTAANILAEAAFLEGKYVQAFPFFGVERRGAPVTAFTRIDNKPIRIKTQIYEPDVVVVLDPSLLDAVDVTAGLKDEGIVIVNTEKSKEEVLEKLKKKPKKLAIVDATTIALEILGLPITNTAILGAVAKATGLVKIESIEEAIKDTFSGELGEKNARAAREAYEKTEVFEL
132		TRUE	PFDSM3638_09740	sugar ABC transporter permease	33.8404	9.62954	1	85.2 (M.score:85.2)	2	8.72483	1.17832	132	MKKTTVAALMLIIPGIAAFLFFNLWPIVYSIYLAFTNAKLGNFPIQSPTAEPLRFVGLENFKWLLKQEKFLNAFKWTWIFVATSVTLKVLAGLFLSLLYNSKYVRGKTIYRSLLIIPWALPLLFSVTVWKFMFDPVFGPINLTLKSIGVEGPNWINDPFWGFIALNIIEVWLAYPFMMTVITAALQSVPDVLIEAAIIDGANYWQRLRHVVLPVVGKPIAFATILTSAASFQYFMVPYIYNAGLFEDRFILLYGFRQAFGATPYYGRATAVMIIATIILAIYMYVNVKITRLQEGAKE
133		TRUE	PFDSM3638_05990	rubrerythrin	21.315	5.22976	1	85.1 (M.score:85.1)	2	14.1304	0.706306	133	MNIEEEIVKKLENLSIKEILGYAIASEEDAEKFYSELATKLGGLLKEFFTQLSTAERGHKEILLRIYKSKFGDENYPVPEGIPFAETTIKVETVRNLIEAMKIALTNEKTAERVYKYLAEKMPEHREIFKFLATQERSHYESLRAHKEFLEDTVESKPEYIEAPPTYISSQLEIPFGPEYRGAR
134		TRUE	PFDSM3638_03915	IS982 family transposase	33.8114	9.76391	4	84.7 (M.score:84.7)	2	11.0727	0.686317	134	MVVLSFQRKILIIKSEIYPIVSKHYPKNTRREVISLYDLITFAILAHLHFNGVYKHAYRVLIEEMKLFPKIRYNKLTERLNRHEKLLLLAQEELFKKHAREYVRILDSKPIQTKELARKNRKDKEGSSEVISEKPAVGFVPSKKFYYGYKLTCYSDGNLLALLSVDPANKHDVSVVREKFWVIVEEFSGCFLFLDKGYVSRGLEEEFLRFGVVYTPVKRGNQISNLEEKKFYKYLSDFRRRIETLFSKFSEFLLRPSRSVSLRGLAVRILGAILAVNLDRLYNFTGGGN
135		TRUE	PFDSM3638_00815	preprotein translocase subunit SecD	55.7784	8.93131	1	82.5 (M.score:82.5)	2	3.9604	1.15566	135	MKWRRILLNFRVIVLIFFLLISITALATRGLTFGLDISGGISITVKLEKPVDSQTMEQVKIALEQRLNTLGVKNIVVEPWGDQFVIVKVANVTEEEADQLIKTIERQGVFYAEFQGIIFATGKDILNVGSVSYDPQHSAWVVPFRLSKEAAEKFAQLALGKAGYPVDMFLDPPVNSTLVVSNRVYEAMLSKTFMLEGDMTLVERIEKAFGIKVVPYANVTPEEIAEIAKGSERIILLDVDGNLSKALKEMGFEVETRSMRSDEDVYDFIKRSLGLYGPYRVSEGLATGNPSTEVMISITAPKTDIQARQDAQVVSVVLRSGSLPVKLSIERIDYISPKLGENFKRQVLVAGIAALLVVGLIVFLHYRKIKIAIPVMFTSFSEVLIILGIAALIRWNLDL…
136		TRUE	PFDSM3638_07130	cation:proton antiporter	13.4953	9.62868	1	82.0 (M.score:82.0)	2	12.9032	0.275208	136	MIAYYLIIAFLGISVTFNMLGSIALHRFPDVYTRLHGATKCTTFGTIFAALAVITHAIVKLQATGNPKYLQMAIHSFVAMLALLLTNPVGAHAIAKAAHKTGYLPKRAVVDAYLEKERGEKNES
137		TRUE	PFDSM3638_07575	DNA cytosine methyltransferase	78.45	5.67773	1	81.3 (M.score:81.3)	2	4.58453	1.1116	137	MKKASILLIIMLIASGLTIFNPKALGLEKYSTLTVGLKLGGYIEFGGKYAVKFADVDPTNWNRAAIEIYENGNRVARKILEEGQTMYYPDENNPLFGVEVTGIWESQKTAYIEIKTPVKLFKENITLKEGESYTMPSGFPQYKITVRDVPSDTKAELTIRYPDGTTVTRTLEKDYPVGVPYKISSELTQSSVLVIEYVKASKDKSVTFNLYIAKMIFAPAKVVQPEEQKEEKTTTEEPIQVVYDDVIYAGEKVTITYNKTTYQIQLVSVGYYSKFDLIIDDKSVETATVKEGGSYIFTKAPLRVEVIPNTVDLKYNRLQAKIYAPIGASGSVILREANITVRLDISQNRVLLGEEIIVFIKVKNEGKGNAFNVKVLAPIPNNFELISGIGTWELSRLEP…
138		TRUE	PFDSM3638_02500	NTPase	20.8483	9.65539	1	78.6 (M.score:78.6)	2	9.78261	1.14206	138	MKKFRFFVSGMPGVGKTTLAKRIADEIKREGFKVGGIITQEIRSGARRSGFRVIALDTGEIGRLAYVGQGYPRLGRYVIDVESFEKVAIPAISRALREGDLIVIDEIGPMEFKSNEFLKALGLVLRSEKPLLATVHRRFVERYRPLGEYYWLTPENREAVFSEILVKIKELLRENENAGNKAQD
139		TRUE	PFDSM3638_07110	aspartate aminotransferase family protein	50.7245	5.70112	1	78.3 (M.score:78.3)	2	4.62555	1.37556	139	MELRPNVKEIPGPKAREIIEKHHKYMATTTNDPNEYFLVIERAEGVYWIDVDGNVILDFSSGIGVLNVGLRNPRVVEAIKKQLDLVLHAAGTDYYNPYQVALAEKLVQITPGDFEKKVFLSNSGTEANEAALKIAKWSTNRKMFIAFIGAFHGRTHGTMSLTASKPVQRSRMFPTMPGVEHVPYPNPYRNPWHIDGYENPDELINRVLEYIEEYLFSHYVPAEEVAGIVFEPIQGEGGYVVPPRNFFKELKKLADKYGILLIDDEVQMGIGRTGKMWAIEHFGIAPDIITTAKALGGGIPIGATIFRKDLDFGVSGVHSNTFGGNAVAAAAALAVMEELENGLLENVQKLEPLFRERLEEMKEKYEIIGDVRGIGLAWGVEFVKDRKTKEYATKERNEV…
140		TRUE	PFDSM3638_10035	50S ribosomal protein L1	23.8372	9.78089	1	74.0 (M.score:74.0)	1	6.48148	0.457159	140	MPFDRQKIVKAVKEAKARAKPRNFTQSVEVAVNLKDIDLKRPENRFKLEVVLPHGRGKDVKIAVIADGAVAEAARKLGLDVISSAELEEIASSPRQARKLAKKYDFFIAEAPLMPKIGRYLGRYLGPRNKMPVVVPPTLTDLTPIVEKLKKTVRIQLKNNPVVHAPVGTEKMSDEEIAENIEAVLNAIIGKLERGESQVKSVYVKTTMGPAVKIEG
141		TRUE	PFDSM3638_08160	intein-containing tRNA-splicing ligase RtcB	106.117	8.79769	1	71.5 (M.score:71.5)	2	2.76302	1.81487	141	MKVPGRVYADDVLIEKMRQDRTLEQAANVAMLPGIYKYSIVMPDGHQGYGFPIGGVAAFDIKEGVISPGGIGYDINCLAPGTKVLTEHGYWLKIEEMPEKFKLQRLRLYNIEEGHNDFSRVAFVAERNIEKDETAIRIVTETGTLIEGSEDHPVLTPQGYVYLKNIKEGDYVIVYPFEGVPYEEKKGIIIDESAFEGEDPQVIKFLKERNLLPLRWEDPKIGTLARILGFALGDGHLGEMGGRLVLAFYGREETLRELKKDLESLGIKANLYVREKNYRIKTESGEYSGKTVLAELRVSSRSFALLLEKLGMPRGEKTKKAYRIPVWIMEAPLWVKRNFLAGFFGADGSIVEFKGTTPLPIHLTQAKDVALEENLKEFLYDISRILEEFGVKTTIYKVN…
142		TRUE	PFDSM3638_09620	threonylcarbamoyladenosine tRNAmethylthiotransferase	48.2604	8.63694	1	70.0 (M.score:70.0)	2	4.23529	2.23009	142	MTKVYIENYGCARNRADGEIMAGLLLSSGYEIVEGEENADIVVVNSCAVKDPTEVKIARRIRELLDRGKKVIVTGCLPHVNPDAIDERVSAVLGVKSIDRIVQAVEYALRGEKLISVPDWRKRNLDKLDFPRLSPRGVHFILPIAEGCLNGCTYCATRSARGVLKSYSPEKIVEWVKWAIRQGYKEIWLSAEDTGCYGFDIGTNLAKLLDEITAIEGEFRIRVGMMNPNHVLKFLDELIEAYKDEKVYKFLHLPVQSGDNEILRRMGRTYTVEEFEEIVNAFRREFPDLNLHTDIIVGFPGESEEAFQRSLELIKRIKPDKVNVSRYSPRPGTIAAKWKQLPGWVVKERSRIMHRVRLQISYEINQRYVGRKVDILVHGEGKKGNVDAVTMNYKHIIIP…
143		TRUE	PFDSM3638_04920	ATP:cob(I)alamin adenosyltransferase	19.7787	8.8512	1	69.7 (M.score:69.7)	2	10.4651	1.11196	143	MRVTTKIGDKGTTRLYTGDEVWKDSPIIEANGTLDELTSFLGEARHYVDKEFQQIIDKIQEDLYKIMGEIGSKGKIQGISKEDVEWIESLIKTYVEKIEIRSFVLPGSTLSSAKLDICRTIARRAERRLATVLREYGLGKLSLIYVNRLSDLLYLMARYIEIKEGKLREVKR
144		TRUE	PFDSM3638_08095	CBS domain-containing protein	17.9788	8.70904	1	69.6 (M.score:69.6)	2	10.6918	1.35952	144	MDLERALNAFHSMKVNQLTPPCSQMPIVEEDSPIIDVLKLLRTRHHVWVVNNRKDMKLVGIIRYLDIIDIFLPPKGARLGAVSSVFKSILSGAEKAGDIMERNFLTINEDATVLEALEKMKRYKIQILALIDEEGKLKGEISLRILINEFLRLIRVGGG
145		TRUE	PFDSM3638_04895	transcriptional regulator	15.9022	8.40089	1	69.2 (M.score:69.2)	2	16.9118	0.917043	145	MGKPMQVSRYWRHFREKYRLIGGKCENGHLLFPKRPICPICGSRNIEEFQFSGKGKVITWTIVRNPPSGFEYYKPYPLALVQLEEGPVVLAQLTDVEPEEIKEGMEVEMVTRKIREFDEDGLILYGYKFRPIIKSE
146		TRUE	PFDSM3638_07125	cation:proton antiporter	9.05416	5.9188	1	67.4 (M.score:67.4)	1	11.9048	0.118106	146	MIFFYATLLIGIAGIITFIRLALGPTVPDRVVAVDTLNTLIVAIMLLLGAAYERAIYIDIAIVYALLSYVGTLVIAKYLQGGLQ
147		TRUE	PFDSM3638_03370	acetyl-CoA carboxylase biotin carboxyl carrierprotein subunit	15.305	4.58291	1	65.7 (M.score:65.7)	1	9.02778	0.890433	147	MKVKIVINGEEYEVEVEEIMPGKFKVTLEGETYEVEAKDLGISTPAPVPQVPTPTPAPAPAPMPTSTPASPQVGDNVVTAPMPGKILKILVSEGQRVTIGQGLLILEAMKMENEIPSPKDGVVKKIYVKEGDTVDTGQPLIELG
148		TRUE	PFDSM3638_05300	threonine synthase	43.0256	5.33903	1	65.3 (M.score:65.3)	2	6.09137	2.42748	148	MVLKCVVCGREYPEDEVRYRCECGGLLEVVIDLDKVDTSIFNGKEIKLWKYESWLPVKKRVSLEEGGTPLYRLLNLESDLGVKELYAKNEGANPTGSFKDRGMTVGVSKALELGMDKVICASTGNTSASLAAYAAKAGIKAYVLIPSGKIALGKLAQAIIYGARVVPIKGNFDDALRVVVETSKELGIYMLNSINPFRLEGQKTIAYEIYDQLGKVPDNVILPVGNAGNISAIWKGFKEMYEAGVIDELPRMIGIQAEGASPLAKAWKEKRKFQPEESPETIASAIRIGNPANWIKAWRAVEESGGLFESVSDEEILRAQKLLASREGLFVEPASAASLAGLIKLLESGEISRNESYVLITTGHGLKDPNIVIKNFQVPEPIDPTLEAFKEVIE
149		TRUE	PFDSM3638_09165	50S ribosomal protein L2	26.0211	10.3792	1	63.9 (M.score:63.9)	2	9.20502	2.28256	149	MGKSLIQQRRGKGSPTFKSPSHRFRGAVKYIPLNYTQEKTLRGVVEEIMHDPGRTAPVARVKFENGIEKLIIAPEGLLVGQEIYIGPDAPIAVGNTLPLAKIPEGTYVYNIEGIPGDGGKYVRAGGTYALVVSREPDKVIVQLPSGELKAFNPMCRATIGVVAGGGRLEKPLVKAGKAYYKYKARNKFWPTPRGVKMNAVNHPFGGKEHHPGKPTTTSRRAPPGRKVGHIAARRTGRRK
150		TRUE	PFDSM3638_09925	anaerobic ribonucleoside-triphosphate reductase	70.0734	5.8733	1	63.4 (M.score:63.4)	2	3.63636	1.72388	150	MEKVDIIHEYARWGSLDVLENANRYPGPSGFFAYVMEEALKSSLSLIPEVGLRAHFSGDIYIHKLPYSLYIPYCTGHSIARLLKRGLRTPTITSRPAKHFDTFVDHIANYLITLQHYFSGAQAFSSVEWYAGPFIRKENLDLRKVKQNIQRLVYNLNYPTRIGLQTPFTNFTVTLDAPKKMLEGDYAIYNGEEVAPLGEYEREAKMFILALTEVLREGDALGQPFTFPIPTLMVTADMIWNDPEVFEAIFTTAAKRGSFYWLNTNVVDPDASYAMCCRLNIDKREFTYTFSLDEDVEKLERQRFGGLWAMPDVTGSVNVTTVNLPRIALKSRDEDEFWEEYEKTLEIVRITTEWFRNRYVKLLSMYPHMYSMIRDYLEEFPSSHFNTIGILGLPEAAAL…
151		TRUE	PFDSM3638_00880	radical SAM protein	34.503	6.21873	1	63.1 (M.score:63.1)	1	4.96689	2.21481	151	MKKYTWEEFAKLMGIEPQKLENKEARVLKKFVEEITWPTHCNYCEGLDLSNPNPVHHPSYELTPACNHDCIFCYSNVAVKLGRAPSPGYYGWENPKAITVSQYGEPLLSPRIIEVNRILRERFPEARLDLQTNGSLLTRELWEKLDFDLVMISLNAADKEKHKRIANADTFEQVVNALKIVGEDDSVRSVVRTIFMPGINDEDIPKIAELAASLGIDEMHLQPLTIHELNVERLKKAGLDFERAESIRELLKAAMEAKKYIDVRISGCILVQLKQMDPITLYSVRRVAREVAPLVKRSKLDI
152		TRUE	PFDSM3638_01035	30S ribosomal protein S27e	6.87274	9.3827	1	63.0 (M.score:63.0)	1	23.8095	1.43473	152	MAKPIIPMPRSRFLRVKCIDCGNEQIVFSHPATKVRCLICGATLVEPTGGKGIVKAKILEVLE
153		TRUE	PFDSM3638_01895	RNA ligase	43.6851	5.77493	1	62.9 (M.score:62.9)	2	6.0686	0.27275	153	MVSSKFKELLYTLGIPEDKVEILEARGGIMEDEFEGIRYLRFKNSVGKLRRGTVLFEDGTTVFGFPHIKRIVNLSAGVRKIFKSSEFYVEEKVDGYNVRVVKFKDRILGITRGGFICPYTTERIAEFVPEEFFKDHKDLVLVGEMAGPESPYLVEGPPYVKEDIQFFLFDIQDIKTGSSLPVEERLKLAEEYGINHVEVFGRYSYKDIDDLYELIERLSREGREGIVMKSPDMKKIVKYVTPYANINDIKIGARVFYELPGGYFTSRISRLAFYIAEKKIRGEELHNLALQLGKALLQPLVEAIHDVTQGDVIAERFRVRVRKIETAYKMVTHFEKLGLEIEIEDIEEIEGGWRVTFKRVYPEATREIRDLIGGKAFVD
154		TRUE	PFDSM3638_01765	50S ribosomal protein L31e	11.0513	10.0971	1	62.3 (M.score:62.3)	2	22.1053	0.63841	154	MAIKAGEEVIFTVPIKKIKKIVPRWKRAPRAVKFVREFVARHAKAQEVIIDPKVNEKIWERGIEKPPSKLRVKVKVEEEKREGEETVRIAYVTLA
155		TRUE	PFDSM3638_01965	multidrug transporter	83.1591	5.68649	1	60.1 (M.score:60.1)	2	3.51351	0.693008	155	MAVKDCPECGGSGKVKVGEKECSVCNGWGYVPADFKLTDHLKGYRNLENFGVDEEVDEIPCPECHGKGTVPVYDTCPTCGGTGKVLACDICGKVKGPWEPGMETTWVCPECERKFKVVYVLDNACDYEDVEIGSYYKGVIDRVERFGVFVKLNKHVIGLIKKKDLLGKREYKPGDEIIVQVLDVRPDKREIDFLEAPLTKYREVHVKKELPVTPIEELKEELAGRTVKIRGKVTQVQVTGGPTVFTLTDGTGITWAAAFEAPGVRAYPNINVGDIVEIIGKVSFHAGSIQVEVIDMYRLWGPDAAEVKRKIEEELDRRAQPSDVGFLVKSEVLEALKPKIMKAAFMIRRAIFEGRPIILRHHADTDGYTAGVALETAIIPLIEKVAPDPEARWHLFKRR…
156		TRUE	PFDSM3638_00180	DUF2067 domain-containing protein	25.6998	5.66576	1	59.8 (M.score:59.8)	2	11.8721	1.42326	156	MRAKKVIVLHVRDDIEKEEFMKEVQRLNLSAFIYIHGKLDSLKVNVQGTKEEIREAIRAIRDAHKRVRGRLYPDRKGLYTYYPEDIFREANANISLPILIKTLELLGERVEVKEDYIKSSMPWREIVELVRRLNEVLSQIALQTTRQIREVVAPVSVAYKIDPEELLDLLVDLGIAEYKEDKFKYELVKNKEQALKELLEYLEGDKDEDRSDKEGRESA
157		TRUE	PFDSM3638_09085	50S ribosomal protein L19e	17.8572	10.9291	1	58.4 (M.score:58.4)	1	6.66667	0.650941	157	MNTLKMQRRIAAEILKCGENRIWIDPERIDDVASAITREDIKRLIKEGVIKKKPIKGQSRYRAKIRHEQKKKGRHRGPGSRKGKKTARMGKKELWIKTIRALRKELRKLKAQKKIDRKTYRMLYIRAKGGQFKNKHQLYLFLEEHGLLKK
158		TRUE	PFDSM3638_06460	TATA-box-binding protein	21.2983	5.03141	1	57.9 (M.score:57.9)	2	10.4712	1.86608	158	MVDMSKVKLRIENIVASVDLFAQLDLEKVLDLCPNSKYNPEEFPGIICHLDDPKVALLIFSSGKLVVTGAKSVQDIERAVAKLAQKLKSIGVKFKRAPQIDVQNMVFSGDIGREFNLDVVALTLPNCEYEPEQFPGVIYRVKEPKSVILLFSSGKIVCSGAKSEADAWEAVRKLLRELDKYGLLEEEEEEL
159		TRUE	PFDSM3638_02840	hypothetical protein	17.146	9.72065	1	57.8 (M.score:57.8)	2	18.3099	1.04338	159	MGMKYLIKLKYIKPAQLAVNREQKLAEFYPIFEDGTLGRVEAKARVFLPEYSDFAKGLGFEVKKRRMITEDDYAYLRAMVYGVVMGVLRNPGDWRRLEERVLEMEPIELRYWASKFRNAYWKYKNMRKLMFLARRFMEVEMI
160		TRUE	PFDSM3638_05200	50S ribosomal protein L21e	11.3343	11.416	1	57.7 (M.score:57.7)	2	20.6186	3.62981	160	MVQKAHSFRRKTRKKLSKHPRRRGLPPLTRFLQEFEVGQRVHIVIEPSYHKGMPDPRFHGRTGTVVGKRGEAYIVEIKDGSKVKTLFIHPVHLRPQK
161		TRUE	PFDSM3638_08210	DUF356 domain-containing protein	14.8693	9.43279	1	57.4 (M.score:57.4)	1	7.57576	0.78826	161	MLNTIVLIRTDNFDKALTALADLVRYGGMKIRGTPRIIPPALSDWAFEQIVGEKPKKKVKAHVVAQIDLPASKAIGRIRDIHPPAHIIVIPVGSPVHKELLRLWGTFKELKGFHPPKEIKRLENIENEEDLE
162		TRUE	PFDSM3638_10045	50S ribosomal protein P1	11.2387	4.29324	1	57.2 (M.score:57.2)	2	33.6449	0.632838	162	MEYVYAALLLHSVGKEINEENLKAVLQAAGVEPDEARIKALVAALEGVNIDEVIEKAAMPVAVAAAPAAAPAGGGEEKKEEEKKEEEEKEEEVSEEEALAGLSALFG
163		TRUE	PFDSM3638_09175	50S ribosomal protein L4	28.6909	10.632	1	56.7 (M.score:56.7)	2	7.05882	0.247033	163	MKVKVFDLNGQPVGEIELPKVFFTPFRPDLIRRAVIASWTHRIQPQGRDPMAGKRRVTENIGKGHSMARVERLKTPPRYAAFVPFARGGRRTHPPKVEKIIWEDINKKEKRLALMSAIAATANYDLVRARGHIIDNVPQLPLIVVDDLQKVQKTRETREIFKKLGIWDDIVRAKEKSGVRAGKGKMRGRRYKKAKGPLIVVGKNEGIVLGARNHPGVDVVVVDNLGVEHLAPGTHPGRLTVWTVSAIERLRELYG
164		TRUE	PFDSM3638_00780	metalloprotease	40.0883	8.92277	1	55.3 (M.score:55.3)	2	7.31707	1.29628	164	MIILGFWAIISILGATVLKGKEGVEIAPFQLLWRTKKFLNFIDNVGSKHRGFWKFYGDLGIIVGFVGSIVVFAYFIKQTLLILFPPAPQQPLPSVQLVIPGITIPLGYGLLGLAVVIIVHELSHGFLARAENLSLKSVGLVLFFVIPGAFVEPDEEELKRAPLRSRLRVFGAGSMANIITGLVALILMSVVGLAFVPGGIVVGGVIKDSPADGVLKPGDVIVEINGHPVPTLEDFIEVMNKTKPEEVITLTVLRDNERINISLKLSQHPGNPEKGFIGMYPGQNIDSRIGLKTPLLVLFLSLYWIYVLNIGIGLMNLFPLIPLDGGRMIMDTLKEFLPEKPAKVIGYSIMGIGLILLGINIVVAIRGMI
165		TRUE	PFDSM3638_10215	dinitrogenase iron-molybdenum cofactor	18.9898	9.51472	1	54.4 (M.score:54.4)	2	12.2905	2.14245	165	MKIAIPTNGGGREDTVAPLFARAPAFYIAEVDEKGNIISEKVIQNPAATAGRGAGPIAVQMLINEGVDTIVAPQVVPNALGAIQAAGIRVYYVTPGTPVEEAIKVATTGQGGQLPSLPQIPTPVTPAPAMYGPVYPPFGWGRGWGKGRGWGRGWGSILGYCPWTGMPSRRALRWYYGWW
166		TRUE	PFDSM3638_02745	GTPase	50.7244	5.97445	1	52.7 (M.score:52.7)	2	8.92857	0.425166	166	MAEKKRRRVVILGAAGRDFHNFNVFFRDNPDYEVVAFTATQIPDIEGRIYPPELAGELYPNGIPILPEDDLEKIIKEHDVDIVVFAYSDVSHEHVMHLASRAHSAGADFWLLGPKSTMLKSSKPVVAVTAVRTGCGKSQTSRKVAQILQEMGFKVVAVRHPMPYGDLRKQVVQRFATFEDLDRYECTIEEREEYEPYLERGMVVYAGVDYEKILREAEKEADIILWDGGNNDFPFFEPDLWIVVTDPHRPGHELTHHPGETNFRSADVIIINKIDTAPPENIQKIRENIEKINPNAIVIEAASPIFVDKPELIKGKRVLVVEDGPTLTHGGMSFGAGYIAAKKFGAKEIVDPRPYAVGSIIETYKKYPHLSNILPAMGYGKKQIKELEETINRADADVV…
167		TRUE	PFDSM3638_01775	50S ribosomal protein L18a	9.32116	9.73283	1	51.9 (M.score:51.9)	1	16.8831	0.626306	167	MKVKVFRVHGYFEKNGRKFKFTKEYRGIKEEDVKELVYSDIGSKHKVKRNKIFIKEIKEIRPEEAEDIVVRRLSLEL
168		TRUE	PFDSM3638_07860	NusA-like transcription terminationsignal-binding factor	16.444	9.48566	1	51.9 (M.score:51.9)	1	6.2069	0.107729	168	MPLKLTTDQIKYIALFESFTGATVLDCLIDQERNKLIYVIKKGEMGLALGRGGINVRRIEGLIGKEIDLVEHSENPEEFIKNIYRTMGVKVKKVHITEKRDGKKVALLDVNPRDKPRAIGRGGRNINIVKQLMERHHGIEDVIII
169		TRUE	PFDSM3638_07055	ABC transporter permease	37.1287	9.99056	1	51.5 (M.score:51.5)	1	3.31325	0.675243	169	MANLKKFLIRRLLTFIPTIIGVTIIVFLIAYKIPADPAKAWAGGEKATQAAIERIIREYHLDKPWYDQYIFLMKGLLTNTIIDPRTSNPVMYDVGKRFPVTFQLAIIAFVFILLVGIPLGIISALKRNTWIDTVVRIFALLGVSTPAFWLGYLMLYVFFVKYRITTIAGVPPFPPKITGVPMIDALLRGDFALFKQHLARFWLPGFTLGFLGMGVTARFVRNSFLEALSSDFVQFLKAKGVPKLRLYRHALKNALVPIVTVLGLQFGGLLGGTPITETVFGLPGMGSYAVQSIQNLDFPVVVAITFIYAIIYVVTNLVVDILYAIIDPRVRY
170		TRUE	PFDSM3638_03390	ATP-dependent DNA helicase	82.58	6.2952	1	51.3 (M.score:51.3)	1	2.36111	1.85848	170	MRVDELRVDERIKSTLKERGIESFYPPQAEALKSGILEGKNALISIPTASGKTLIAEIAMVHRILTQGGKAVYIVPLKALAEEKFQEFQDWEKIGLRVAMATGDYDSKDEWLGKYDIIIATAEKFDSLLRHGSSWIKDVKILVADEIHLIGSRDRGATLEVILAHMLGKAQIIGLSATIGNPEELAEWLNAELIVSDWRPVKLRRGVFYQGFVTWEDGSIDRFSSWEELVYDAIRKKKGALIFVNMRRKAERVALELSKKVKSLLTKPEIRALNELADSLEENPTNEKLAKAIRGGVAFHHAGLGRDERVLVEENFRKGIIKAVVATPTLSAGINTPAFRVIIRDIWRYSDFGMERIPIIEVHQMLGRAGRPKYDEVGEGIIVSTSDDPREVMNHYIFG…
171		TRUE	PFDSM3638_05565	putative methyltransferase	40.3017	4.68021	1	50.8 (M.score:50.8)	1	2.5788	2.93652	171	MKEIVERVKTKTKIPVYERSVENVLSAVLASDDIWRIVDLSEEPLPLVVAILESLNELGYVTFEDGVKLTEKGEELVAEYGIGKRYDFTCPHCQGKTVDLQAFADLLEQFREIVKDRPEPLHEFDQAYVTPETTVARVILMHTRGDLENKDIFVLGDDDLTSIALMLSGLPKRIAVLDIDERLTKFIEKAANEIGYEDIEIFTFDLRKPLPDYALHKFDTFITDPPETLEAIRAFVGRGIATLKGPRCAGYFGITRRESSLDKWREIQKLLLNEFNVVITDIIRNFNEYVNWGYAEETRAWKLIPIKKLPEYNWYKSYMFRIETLEGSRGYEDEIPEEDIYNDEESSTT
172		TRUE	PFDSM3638_01550	inosine-5-monophosphate dehydrogenase	44.2299	6.00521	1	50.4 (M.score:50.4)	1	3.06122	1.30717	172	MVGIQVQEVITDKYAKIDINAPLSEAIGIFEKEDPDLILVFDGNVYKGVLTQDLIIKSHLKWDPTKAKVRDVYKPAPVVKPTDDLSHAAKLMLETDLRSLPVGENKAEIIGVISDLALLERVVAEEFGKRKVEEFMTKDVITLTPDDTVAKALATMRDHGISRIPVVDEEGKLEGLVTLHDLIIRFIKPRFRAQAGELAGEKIPPFSMKLREAMIRGVITILPDATIREAVATMKDNNIDGLVVVDENNKVVGILTVKDLLLPISRMVEKEAKFYLQLGGDAAALSDFTRERIINDIKKFVDGYSDLLGNEGIIYLYIRRFNEKFRGVHLYQARMRVVTDRGVYVATGETWGAIQAVHDALRAIERQLLQKAELERDIRYAKRFIEKLELWR
173		TRUE	PFDSM3638_07170	hydrogenase	20.1713	5.04967	1	49.7 (M.score:49.7)	1	8.67052	1.25791	173	MSKAEMVANKIKERFPNAEVVVKTNKWGRERVWVRISREEYKELMKFIRELDPEAHYSIGIEQDWGDELGFLNHILLFYDEPPGVSLLIDVHAPKDNPVLPDTSDIFPISLQFEREGMEMVGLDFEGAPDKRRLFLPDDFPEGIYPLRTDEKGVPEEMVKNAGHPYLLRREKK
174		TRUE	PFDSM3638_03085	hydrogenase nickel insertion protein HypA	15.753	4.99766	1	48.6 (M.score:48.6)	1	10.7914	0.598202	174	MHEWALADAIVRTVLDYAQKEGASRVKAVKVVLGELQDVGEDIVKFAMEELFRGTIAEGAEIIFEEEEAVFKCRNCGHVWKLKEVKDKLDERIREDIHFIPEVVHAFLSCPKCGSHDFEVVKGRGVYISGIMIEKEGEE
175		TRUE	PFDSM3638_05460	ABC transporter ATP-binding protein	22.6835	9.12635	1	47.4 (M.score:47.4)	1	6.43564	0.747709	175	MKLEIRELSVGYKRPLLEDITLELENGDAVNFYGPNGIGKTTLLKTIATYLKPLKGEILYNGAPIRKVRGKIFFLPESILVPNKVRARDYLKAVASLYGVNPSMEEVVRALDLVGISDENIKFEKCSQGMKRRIQLASALLVNAEIFVLDDPVVAIDEDSKHEILKGIVDTLKKRGIVIISSREKLPYFPINEDVVKYKPKL
176		TRUE	PFDSM3638_05970	rubrerythrin	38.7778	4.9387	1	47.3 (M.score:47.3)	1	4.05797	1.04831	176	MLSINPTLINRDKPYTKEELMEILRLAIIAELDAINLYEQMARYSEDENVRKILLDVAREEKAHVGEFMALLLNLDPEQVTELKGGFEEVKELTGIEAHINDNKKEESNVEYFEKLRSALLDGVNKGRSLLKHLPVTRIEGQSFRVDIIKFEDGVRVVKQEYKPIPLLKKKFYVGIRELNDGTYDVSIATKAGELLVKDEESLVIREILSTEGIKKMKLSSWDNPEEALNDLMNALQEASNASAGPFGLIINPKRYAKLLKIYEKSGKMLVEVLKEIFRGGIIVTLNIDENKVIIFANTPAVLDVVVGQDVTLQELGPEGDDVAFLVSEAIGIRIKNPEAIVVLE
177		TRUE	PFDSM3638_05660	type III-B CRISPR-associated protein Cas10/Cmr2	100.921	7.02569	1	46.6 (M.score:46.6)	1	1.49254	1.27674	177	MVNIKEKLFVYLHDPPDKALKIENHEERSKKILSSGNIQYSRTDKVKQADALSSKTQRFIIRTKENKEPVIDFLGRSSGKYFHVGYPVFIHPISTEIKRYETLEKYIDLGRSNRGERFVNEFLERVSKLEGDVLKEVFEDASNKFKGEESKQWAYIWQFYPVKLKEGVKEFAKSELKLKEEEAEKFAEEFVNLPADTRFPDHAIWTHLDLTSALSVKDPTLLRIKIVPVQPFIANSRKQLDLWASSHLLSMLMYKALEVIVDKFGPEHVIYPSLRDQPFFLKFYLGENIGDEILVANLPNKALAIVSGKEAEKIEEEIKKRIRDFLLQLYREAVDWAVENGVVKVDRSEKDSMLKEAYLKIVREYFTVSITWVSLSEKEDIYQVTENAGLSDEDVKKWL…
178		TRUE	PFDSM3638_07165	hydrogenase	18.2905	5.95084	1	45.8 (M.score:45.8)	1	5.98802	0.447784	178	MTNNSERKRLEKRIAQLCKFIGRSPWVFHVNSGSCNGCDIEIIAALTPRYDAERFGVKLVGSPRHADILLVTGPVTNQSLERVKLVYEQTPDPKIVIAIGACPTGGSVFYESPFTNAPLDRIIPVDVFVPGCPPRPEAILHGVVLALEKLAKMIKGEVPPEEGEENE
179		TRUE	PFDSM3638_06295	hypothetical protein	50.0321	9.59867	1	45.7 (M.score:45.7)	1	2.84464	0.0382247	179	MNRSLYLIFIIVGYTLGIWTFTVIPKIYMTIGLKGLVLMLVFSAVVVAGVLGQINSIKEKTYRIHEFMVKSARLPAVSVVLVSFLFFVSAVVAHYTGLAVEKLFGIGAPGFGLIIALVAMIILIGTRGRSLDAIAIFSILLIILIIISVFFLRSKVSEVVVKETSREFVRTTLETVFSFSGELNMRTVVLTFLTTLMMFGLGVGFYYIIGMTISGWKFDIKKVLAVVVILQALLSLSAALILTYSIGAAHQAYWSAFEKGKAMEALDVYDKYFLPLWREYTSPERMNFLRLIDTVYGIPDILRKLGMEGGTYIIAFLMISLFFAGFTTLLVLIETGGQIISDMFQVTRKNAILIVSIITGILSTLLSLPAIKEVLVVLVALMLPLFALIESLPALKATK…
180		TRUE	PFDSM3638_06310	cystathionine gamma-synthase	41.1776	6.15859	1	45.0 (M.score:45.0)	1	3.00546	1.39842	180	MEPLHYPIYLTAVFKQIGDAYLTERGTELKYSREENPTVRNLEDKLAKLENAENALAFNSGMGAISTLFLSLLKAGDEIVMSMEGYGTTIEVPKLLEKFGVRVRLAYPSAEKICETITSNTTLVFIETMTNPTLKVIDVREVAKKCREEEITLIVDNTFVTPILYRPLEDGVNFVVHSLTKYIAGHNDVTGGVILWNGKFLNDLWDWRRRLGTIIQPFDAWMVERGMRTLNVRFEKQSKNALAIAEFLQDHPKVRKVHYPGLPSDPYHGIARRLFRKDLYGGVVSFDLGSEKSALAFLRSLKKIFPSPSLGGVESLATYPVKSAVKNMEKETRDLLGITDGLIRLSVGIEEVDELIEDLDRALKGC
181		TRUE	PFDSM3638_02810	hypothetical protein	33.8936	9.57336	1	45.0 (M.score:45.0)	1	5.66667	4.68395	181	MKVVGIKGSVSYLQALKYLKTKKVTKRLKEIEKLVDTLITLAPYAPEGSKIETIRKNYAKISFNKIKTVSRSKIGSPRIKSIMLLLWNFGLLDVKIIENSWYVRKTKLASLLEENFKDLSPSEKLKVYLLGGLLVDTPARFVYRCTLNGVEDYKGVKKAILGYLSDQRSNSLIIGLSNMLESIKFIEEAQAYSGKKEYIGLVDVAFYGLSGLYLDVKRESGKLTVKPNFRELRALYEIDKSVATGSDYGLSISKEILENLANTKRRKTIFSEEVQELLVNVIKENAISISQDLQNMYGII
182		TRUE	PFDSM3638_07495	glycine cleavage system protein H	15.1327	4.31577	1	44.8 (M.score:44.8)	1	11.194	1.5778	182	MIEVGEYKIKEGLYYTKEHEWVQVLEDGTVLVGITDYAQKELGDLAYVELPEVGKVVEKGDVLCEVESVKAVSEVYAPVSGEVIEVNEELADSPEKINEDPYEAWIAKIKPKNLEEELKELMDAKAYAEYLKTL
183		TRUE	PFDSM3638_09065	50S ribosomal protein L15	16.3899	10.59	1	44.5 (M.score:44.5)	1	7.48299	0.997172	183	MIRRRKKVRKLRGSHTHGWGCKKKHRGGGSKGGRGMAGTGKRNKSKWTWTIKYAPDHLGKRGFSRPPEVQREVRVVNLKFIDEHLDELMQMGIAYEEGGKIIVDVTQFADKVLGTGKLTRPLVIKARAFSPKAEEKIKAAGGEAVLV
184		TRUE	PFDSM3638_01260	8-amino-7-oxononanoate synthase	43.7831	6.04772	1	43.6 (M.score:43.6)	1	3.29114	2.09751	184	MGKLDWIREELEELKKKGLYVTIRVLQSAQGPWVIVNGKKVLNMCSNNYLGLAAHPKIKEAAIRAILDYGVGAGAVRTIAGTMDLHVELEEKLAKFKKREAAILFQSGYNANLGAISALLRKGEDGVFLSEELNHASIIDGMRLSGAPKVIYKHLDMEDLKKKLEENKDKKKKIIVTDGVFSMDGDLAPLPEIVELAEQYDAIVYVDDAHGEGVLGSHGRGIVDHFNLHDKVDFEMGTLSKAFGVIGGYVAGPEEAIEYLKQRARPFLFSSAPNPPDVAAAIAAVEILQKSDDLVKKLWDNTHFLQKGLRDLGYDLGNTKHPITPVMLYDEKLAQEFSRRLFEEYNIFAQAIVYPTVPLGTARIRLEPSAAHTKEDLKLVIDAFEDLGRKTGFLK
185		TRUE	PFDSM3638_05235	rubrerythrin family protein	23.2657	5.11622	1	43.4 (M.score:43.4)	1	6	1.1198	185	MKLIEIIKELKNMEEEAFKSYLELIKNLRDPEDADLKRITLRLAVDKIFHRELMEAIERAYEKSVKLIRDNIEPYYPELEPIRESLLELDQGLALIPGVPALLLPLDLGKLGRRIPTEDILAEIIKSLPEPSIIPEEKREEIKGNLEKVTSIEEEMIDKYTKLHEKAFHPVIKDLTSSIIQNENQHKALLLKLKERIESE
186		TRUE	PFDSM3638_01995	MoxR family ATPase	34.7931	5.75591	1	43.0 (M.score:43.0)	1	5.80645	2.91533	186	MVSGEKFLLKLKKEIHKAVVGKDEVIELLAVALLAEGHVLIEGLPGVAKTTIAKSFAQALGLKFSRIQLTPDLLPADILGTVYYDQVDGNWKIKKGPIFANVVLADEINRAQPKTQSALLEAMQERQVTIEGKTFSLERPFLVIATRNPLEFEGVYNLPEAQIDRFLLEIKVGYPSIEEELEMLKRKDKGEFYEVKTIFSKSEILEAIETVKRVRTSEEVLKYLHSIIVETRKDERLLVGASPRAAEHLLYAAKAKAFLEGRDYVIPDDVKSMAIPVLAHRLIVKPEYEIEGIKGDTVIKEILDKVEVPI
187		TRUE	PFDSM3638_05655	type III-B CRISPR module-associated proteinCmr3	36.2926	8.69408	1	43.0 (M.score:43.0)	1	4.34783	0.883297	187	MIEVTFTPYDVLLFRESRPFDAGSESVARSIIPLPQTVAGAIRTLLFYKGLKNCVGVGEEEPEFTLVGIAIGTEKGRIYPLPFNIIKSEKFYKVVNPGRFLGKLILPPKGKYKSGYVTESILEKYLKGELKEVEENKVIRIEKEKRIGIKLSREKKVVEEGMLYTVEFLRIEKIYAWIEDPGCGIKDILSSYEFLTLGGESRVAFVEVDDKTPDIFNRELGSTKKALFYFSTPTIGKVGEIVQELEKRLNAKIDDYLLVSSRPTAISGWDMHEKKPKGTKFAIPPGSVLFVEFKEEVEVPPYIKLGKLKKLGYGLALGGIWE
188		TRUE	PFDSM3638_06975	DUF1957 domain-containing protein	74.4446	6.23293	1	42.2 (M.score:42.2)	1	1.58228	0.0226811	188	MRGYLTFVLHSHIPYVRKHGKWPFGEEWVFEAIAETYIPLLMEFEKLRNKGVNFKLVISFSPVLLEQLNDEYMKKEFEKYITRKLELMKEDLTKYTNDQLKKAIAYMITYFEDVYRYWKEINGDIIGKFREFQEAGYLEIITSAATHGYLPLLGRDEAIEGQIANAIKTYEKYFQRRPRGMWLPECAYRPDGYWRSPSTGEVVWRKGIEHFLKKYGIDYFFVESHLIDEGPATSKYGEILPEKTKKSTLRPYFLKNGIAVFARNRETGIQVWSADIGYPGDFWYREFHKKAEKSGGQYWRVTSKEIDLGGKEPYVPEKAMERVEEHARHFISLVSSLLEEFKKKEGEYGIVVAPYDTELFGHWWFEGVKWLGKVLELAEKLGIKTTTISEFLDNFDGKR…
189		TRUE	PFDSM3638_07015	peptidylprolyl isomerase	29.0426	5.02767	1	41.7 (M.score:41.7)	1	5.81395	0.627911	189	MKVEKGDVIRLHYTGKVKETGEIFDTTYEDVAKEARIYNPNGIYGPVPIAVGAGHVLPGLDKRLIGLEVKKKYVIEVPPEEGFGLRDPGKIKIIPLGKFRKSGIIPYPGLEIEVETENGRKMRGRVLTVSGGRVRVDFNHPLAGKTLVYEVEVVEKIEDPIEKIKALIELRLPMIDKDKVIIEISEKDVKLNFKDVDIDPKTLILGEILLESDLKFIGYEKVEFEPTIEELLKPKSAEEQESPNEEQQEESESKAEES
190		TRUE	PFDSM3638_10350	transcriptional regulator	15.7213	7.6484	1	41.5 (M.score:41.5)	1	6.06061	0.160074	190	MKIRELIEKLNEKQKKTVMSCLSKCEILDLDEEIETYPSKEISRFLKVISNPIRYGILKMLNDRWMCVCLISEALEIDQTLVSHHIRILKELDLLEERKEGKLRFYRTNKEKLREYLEKVLEDFNHGTSKGS
191		TRUE	PFDSM3638_07140	hypothetical protein	11.1328	4.72475	1	41.2 (M.score:41.2)	1	10.101	0.0066089	191	MKRALGFLSLLVIFASLLVALSPEYGIKFGVGGEDWLKYRYTDNYYIEHGIEEVGGTNIVTDIVFDYRGYDTLGEATVLFTAIAGAVALLRPWRREENE
192		TRUE	PFDSM3638_07120	cation:proton antiporter	18.7239	6.59097	1	40.6 (M.score:40.6)	1	4.79042	1.05488	192	MSFITAFIWAYFLWLVLTAGSKGMLWSTQELIAGLIFASIVGYSTRNIIGEKASRFLNPVKWILFVAYAPVLFWGMVKANLDVAYRVITGKIRPGIVRVPVELENDAQYTILSNSITLTPGTLTVEACPEEKALYVHWINIPEGLEWPENSEPVSGPFEKWARRLGA
193		TRUE	PFDSM3638_00695	hypothetical protein	30.596	4.66846	1	40.4 (M.score:40.4)	1	6.08365	1.69413	193	MRIEVPSRDHMNELSKALSKAGIMNRPKEEMNIEISNLIVFKDTFSKLTEVPFEEVRKRLGEVERIYRTFIKMLKEKELSFEEIDEEYVEILEALENANAIEIIGDKLKLVKDVSLEDLEFEVSIPLEEIYERVEEFEKAGGKLVTEVILSKKYYVEVMEVDLEAIQKALEIAENYAEEHVITRAALEGLARSTLAELILNMANEVNRKNELIDILLALEPVSLEGEKSEMRVYFERDAIEDFLKELQTLGYIKVKGNRIWFY
194		TRUE	PFDSM3638_07880	DNA-directed RNA polymerase subunit B	126.924	6.28367	1	40.2 (M.score:40.2)	1	1.07431	1.67177	194	MRGPTVVDVTPDDLWIVMESYWQEKGLVRQHLDSYNAFIERGLQEVVNEFGGIKPDIPDFEVKFGKIRVGEPEFQEPHGQRKPLYPMDARIRNLTYAAPLYLEMIPVIKGVEQDPVEVRIGELPIMLKSKVCRLYGLSDEELIKLGEDPKDPGGYFIINGSERVIVSIEDIAPNRTLVEKDERQEKYIAKVFSYRHGYRALVAVERRKDGILYVDIPNVPKPVKFVYVMRALGLERDKDIVEAVGNDPEVQQIMFDNLEDASDITTQQEALEFIGKLVAPGQAREYRLKRAEYVIDNNLLPHMGVSPEDRIKKAYYLGMMALKVIELSLGRRPEDDKDHYANKRLRLAGDLLKDLFRVAFSQLVKDIQYQMTKTYQRKGDKYTFGNIHRFIRNSIRPDV…
195		TRUE	PFDSM3638_07205	DUF4870 domain-containing protein	12.2807	4.97608	1	40.1 (M.score:40.1)	1	14.2857	0.862858	195	MESGNTSLGLNENVEAALAYAGAFISGIVLLILEKESEFVRFHAMQSTVTFLGLLALDLLLGWIPIFGFVFDFVIKIVAIVAWIVGIVKAYQGERFKFPIAGDLAEHFLPKV
196		TRUE	PFDSM3638_02710	type II methionyl aminopeptidase	32.8216	6.63155	1	39.9 (M.score:39.9)	1	3.72881	1.46519	196	MDTEKLMKAGEIAKKVREKAIKLARPGMLLLELAESIEKMIMELGGKPAFPVNLSINEIAAHYTPYKGDTTVLKEGDYLKIDVGVHIDGFIADTAVTVRVGMEEDELMEAAKEALNAAISVARAGVEIKELGKAIENEIRKRGFKPIVNLSGHKIERYKLHAGISIPNIYRPHDNYVLKEGDVFAIEPFATIGAGQVIEVPPTLIYMYVRDVPVRVAQARFLLAKIKREYGTLPFAYRWLQNDMPEGQLKLALKTLEKAGAIYGYPVLKEIRNGIVAQFEHTIIVEKDSVIVTTE
197		TRUE	PFDSM3638_09080	50S ribosomal protein L18	23.1724	9.72781	1	39.8 (M.score:39.8)	1	8.867	0.202176	197	MAHGPRYRVPFRRRREGKTNYRKRLKLLKSGKPRLVVRKSLNHHIAQIIVYDPKGDRTLVSAHTRELIRDFGWKGHCGNTPSAYLLGLLIGYKAKQAGIEEAILDIGLHPPVRGSSVFAVLKGAVDAGLNVPHSPEIFPDEYRIRGEHIAEYAKMLKEQDEEKFRRQFGGYLVKGLDPEKLPEHFEEVKARIIEKFEGEGARE
198		TRUE	PFDSM3638_08675	ACT domain-containing protein	25.1619	8.40003	1	39.6 (M.score:39.6)	1	3.9823	1.82689	198	MKKEEEKPSIAKLVKEYIETKPCIRELMILGIVNYSALARFIEGEFKKKGIKASTGAIKMALIRLGEELSEERSGFEKAIKNVISKTVIQLQSDLVVITARRDIVLSKIKELVEVAKDSRFFQLTQGIETFTIAMANEEKEKILELLKGGIIDVQEGQTAILLISPLAIINTPGIVAFITTALAVNGINITQIISCYKDTILLVDRRNAPSAYTILEDLIIKMREL
199		TRUE	PFDSM3638_04265	hypothetical protein	33.1735	6.42583	1	39.2 (M.score:39.2)	1	2.7027	1.89122	199	MVAVRSFGEAIDFLVKYKKLLLLTIIPALISGVASPFVEEYPETQRFSDIIIERYGAISPEINWKLYIPVVILVVTILSGIEFGIIDFAIKAKRGKVDKFSLKEIAIYGLRNAGWGLLLTIISSLYLLALVIGGSIPFIILLLVFDIVDFLEPLVPIVELLFVIWVLILTLFSLSVSGLVFPRFVDTRSLREALRVIKYGRRYKASMIGFGALLGLSSFALLMAVGIVEMSVYMFSMNTVARLLASLLTVPLIALLSLFVIIAETIFYENVRADYEERRALFYTLYSNLTNLEDVQ
200		TRUE	PFDSM3638_00635	indolepyruvate oxidoreductase subunit B	21.9736	8.36916	1	39.0 (M.score:39.0)	1	4.52261	1.23573	200	MEFNIIIAGVGGQGGLTLSRIIGSAAMVEGYRVRIGETLGMSQRYGSVLSYLRFGDSVYSPLIEEGKANLMLALEPVEALRNAAFLGKGSYAIVNAYPIHTATTLVGKEKYPSLEEIKEALEKICRVEMMNFQKEADLINPRTTGVLMLGYAQGKGLLPLKKESIIEGIRLTLREKLWEINFKAFERGRELAKHVCCDV
201		TRUE	PFDSM3638_09930	ribonucleoside-triphosphate reductase activatingprotein	27.6424	5.21053	1	38.7 (M.score:38.7)	1	6.72269	1.0669	201	MLIGGWKAVSMVDIPGKVTFTLWLCGCNLRCPFCHNWKLAQGMECFKLEKEELIAEVEENSYLVDYFHVTGGEPLIQWREFQELLREVREYLPVSLNSNLTLVKPLEKIIDLVDHVATDLKAPPTELYGLPENVSLKLWQLFLKGLEIVSENSIPLELRIPVSKGFDIQEIMRWIEEGLEKIDTDFYVVLHPLVGPPITNPRNKEWCNNHCWADREIELIKEKLEERGVKKVIVRKYS
202		TRUE	PFDSM3638_07490	30S ribosomal protein S17e	7.9194	10.4898	1	38.7 (M.score:38.7)	1	19.403	0.249303	202	MGKIRQGFIKRVARELVNKYPNEFTTDFEHNKKKVQELTNVTSKKIRNRIAGYVTKLVRMKMEGKIL
203		TRUE	PFDSM3638_05005	hypothetical protein	35.6834	4.76577	1	38.5 (M.score:38.5)	1	3.55987	1.26059	203	MRKGILIFTLISFLLLNTPVLAQEPLNNIDLQPFLKLTMNVTLVNTGEYPKFIAVNPTYDFKTFREGDEYLLHNTTDLIQLSKANLILNKRVGFWIYPHEVLKVEFSINIPMDLGELYLQDYADLCYPDYTITWSTKRITYPPSLGVGPLCEVVYPHLINYPILVDLTSFIQVRDPEIVIYSYSGEVEFTITNRGPKTMFAVALPLIPVDAKIYSITPNPDMNYTEYMGKFLPTYLKSQVQNAKFNLTQESVLFEYTDTLLSTMSSQQNLIQNSITTNEDIVDYPIWIVVLGENSSFDIKYKFQWEFTR
204		TRUE	PFDSM3638_07200	CGP-CTERM sorting domain-containing protein	69.8826	4.87055	1	38.4 (M.score:38.4)	1	1.57729	11.7396	204	MRGKILSFLIVLTLLALPTTAQCPSLGRTVVLKAPAVSMTSTGEMIGVPTEFVITVAPGSGHVYVETWPLTEVDMQASARLAAEIAGVVTGKDMSKYDVFIQVRADSPIIGGPSAGGTMTVGIIAALMGWDVRSDVMMTGMINPDGSIGPVGGILEKASAAHQAGAKIFLIPKGQRIQVVTETQKKQIGPITQITTTQRKVDVVEYAQERWGLKVIEISDIYEAVYYFTGHKLEKPQPPQNVVISTSFLEGEAKSDYEETLQYYNTISNKLKNSEVGYTTYSYLKAALDNAKSTLDNAKNALDSGKYYTAMSLSFQARIVIRHVDWYIDLYEGKDIEDIFSEVKDEIDRIESYISNLTIRGVTMLQAVAAAETRIEEAKEYLKEAQISYYNQDYWNAIG…
205		TRUE	PFDSM3638_05965	rubrerythrin	20.6817	5.23574	1	38.2 (M.score:38.2)	1	5.17241	1.25459	205	MTIQEVREGLPIEKMADFSLEELLGMAIKAEIGAREFYKSLAEKIKIEALKEKINWLAEEEKKHEALLRKLYSQMFPGKEVVFPKEHIGPELQPVARELEKVQDIIDLIRWAMKAEEIAAEFYLKLEEMVKEEEKKRLMRYLADMERGHYYTLRAEYELLLNWEMYSQMMHIGP
206		TRUE	PFDSM3638_07155	cation:proton antiporter	54.9437	8.95492	1	38.1 (M.score:38.1)	1	2.94118	1.55095	206	MTWLPFIIIIPLLGAFSMPIVSLLKGKAKEIWASMISFATLIVGIQVFREVWSKGTIVYTLGAPNPFGKATFPIRIVWEVDKFGALMVLIVTFVSFLAVIYSIEYMKHDTGLEKFYTLILILELGMLGIAITGDIFNFYVFLEIMSIASYALVAFRNDTWEGIEAGIKYMFAGSLASSFVLLGIALLYGQYGTLTMGYLAVKIAENPTIVAKVALALFIGGLLFKSGAAPVHMWLADAHPAAPSSISAMLSGLVIKIGGIYAIARIVFSIFSPTINLGTIGWIIIIFACITLIVGNAMAVVQEDLKRLLAYSSVGQIGYILLGLGIGMVAYGTRVGEIALAGAIYHTVNHALMKALLFLVAGAVIHEIGTRNMNELSGLAKTMPKTTFAFLIGAAAIVG…
207		TRUE	PFDSM3638_10190	replication factor A	41.0195	4.94212	1	37.9 (M.score:37.9)	1	3.35196	2.44594	207	MSAFTKEEIIKRILEEVEGITLEEIENQIRQIMRENNISEHAAALLLAERLGVEVTKREEQPLMKISDLYPGMDPHEVNIVGRILKKYPPREYTKKDGSIGRVASLVIYDDTGRARVVLWDSKVLEYYSKLEVGDVIKVLDAQVRESLSGLPELHINFRARIIKNPDDPRVQDIPPLEEVRVATYTRKKISEVEPGDRFVELRGTIAKVYRVLVYDACPECKKKVDYDPGMDVWICPEHGEVEPIKITILDFGLDDGSGYIRITLFGDDAEELLGVGPEEIAQKLKEMESMGMTLKEAARKLAEEEFYNIIGKEIIVRGNVIEDRFLGLILRASSWEEVDYKREIERIKRELEELGVM
208		TRUE	PFDSM3638_04860	pyruvate ferredoxin oxidoreductase	12.0037	5.199	1	37.6 (M.score:37.6)	1	16.1905	0.340029	208	MAESPFKADIERAQKELSEKMTPGAIVYIPGSSVINKTGSWRVFKPEFNRDKCVRCYLCYIYCPEPAIYLDEEGYPVFDYDYCKGCGICANECPTKAIEMVREVK
209		TRUE	PFDSM3638_09525	signal recognition particle protein Srp19	11.6374	10.1418	1	37.3 (M.score:37.3)	1	13	0.271347	209	MGRFVVWPSELDSRLSRKYGRIVPRSIAVESPRVEEIVRAAEELKFKVIRVEEDKLNPRLSGIDEELRTFGMIVLESPYGKSKSLKLIAQKIREFRRRSA
210		TRUE	PFDSM3638_10140	ribosomal biogenesis protein	26.0537	9.56022	1	37.1 (M.score:37.1)	1	3.58744	17.1449	210	MMLITTSHRPTRRTRSFGHDLERVFPNSLYLTRGKKTIQELLMEAYDRGYERLLILNVWKGNPLKMTFIKVHPEDWGYLGYLYLHGIKLQREMGFKGLNPIREDMPLVVTTAKRVGWDHIAFAQVFAELTTGKFVPRGDKSLTYIADKYDTDVIAVIERHPRGMVINFYRLDVTKDRPVGPLINVKIWIMEDGRRWDYKEALGIKVPRREKGEGQESSSENRD
211		TRUE	PFDSM3638_03970	GNAT family N-acetyltransferase	40.8323	9.55029	1	36.7 (M.score:36.7)	1	2.88184	1.52696	211	MNIAEIEVTHKVKEKEWKEFLSRSEYATVYHTPEWKKTLEESFGYKPYYLFVKDESDLIVGMLPLFYVKSKLTGNRLSSLPFSHISGPVGDKATKNFLISEAINLYKNLGASYLEIRDRVEDNRFLSKNMFSTYILELNPNIEEVWKQLHKGSVRRAIKKSEKSGVVVDTAKDIESLKEFYDLNCVGKRKIGVPCHPWKFFKNLFRFMNDYISLYVAKYQNNIIGGGIMIYYKDTVIYGYGAAHPHYLKLYPYNAFLWKSIKDACLSRYKYFDLGRAHYNVERGLMDFKRRWGTIEKKLYYSYYSKNKDLKILDMSGLKYRLGTKVIRKMPMPIYKKFSDRIFGSLG
212		TRUE	PFDSM3638_03190	CRISPR-associated endonuclease Cas3''	27.0593	8.31469	1	35.2 (M.score:35.2)	1	4.64135	0.154101	212	MSCKAFQGQTLREHIEAMLAAWEIVKNKYIPSIIRVMKTVGVKFTEEDADKFMKTLIILHDVGKCSEVYQKHLSNNEPLRGFRHELVSAYYAYNILKDMFKDETIAFIGALVVMMHHEPILMGQIRSLDKEELTPEVVLDKLRTFNGVMEGTESFIKSMIKEKLGVIPKVPSPTQEDVLREVIRLSVLARHRPDSGKLRMVVGALLIPLVLCDYKGAKEREGESPKFAEVLRVEMMK
213		TRUE	PFDSM3638_09120	50S ribosomal protein L24	14.3229	10.3642	1	35.1 (M.score:35.1)	1	7.43802	0.379548	213	MKISSKQPRKQRKFLYNAPLHVRQKLMSAPLSRELREKYKVRNLPVRVGDKVRIMRGDYKGHEGKVVEVDLKRYRIYVEGATLRKTNGTEVFYPIHPSNVMIIELNLEDEKRKKIIERRAG
214		TRUE	PFDSM3638_10395	aminopeptidase	65.4942	8.48356	1	34.8 (M.score:34.8)	1	2.1164	9.15422	214	MKMRRIFITLICIGIILFFTFKNVTIHDNNNLENFQIIDGKDIPKSNASFHGVTYLTTHNFSKLEVRSYIELTINPSSQKSLEVDGKKILTVKNVRESDTSRISLIFPKRVVIGNITAKGCFIKNVSIVTMPQANILVLVLKIPKDKIGNITIEYHAEVMRFEPFVSYIEMRESWSIFRTTYDGNELVLSSMWLLRELETFESYESQIRLKVPKGWEGVVIDEKGEGFWEVIYKGSTREGNILVYSSKNSRDPLIIVGNFSLIRKNLSGITINVYQVGRKREDVVYVVSKIVRSYSRILGGYPYSSLKIFYLESLNTKAGFEFPQGVILIHPKRNETLLLAHEIAHSWFGDYASFGRMDETLANYLAIMSMNSYEVLNFVEHSPLINSTYTLAQVYTED…
215		TRUE	PFDSM3638_02665	indolepyruvate ferredoxin oxidoreductase subunitbeta	21.9607	6.8518	1	34.7 (M.score:34.7)	1	4.45545	0.720882	215	MKEYNIVITGVGGQGILTAANILGWAALRAGYKVRVGEIHGMSQRFGSVIAYVRFGEEVYGAMVPEGKADVILSFEPVEALRYINYLKKGGLVFTNARPIPPVQVSMGIARYPSLEEIKRIVEEDFGGRFLAFDAEKLAIEAGHVVTTNVVLIGALTQTPGFPLSEDHVRDVIKLSVPPKAVEINMRAFDLGVKTAKEMLAL
216		TRUE	PFDSM3638_05195	orotate phosphoribosyltransferase	20.086	5.44776	1	34.2 (M.score:34.2)	1	3.84615	16.1801	216	MKEELIRMILEEECIKFGHFILTSGKESSYYIDIKKLITNPKALRLIARLIKEKAEEEGIQFDKVAGPELGAVPIATALALETDRPLLIVRKKKKEHGTGRQIEGEVKEGDRVLLVEDVTTTGGSVLRAAKILKEAGAEITGIFVVVDREEGAKEAIEKEGFKLYPLVLVHELFEAAGVSSE
217		TRUE	PFDSM3638_01745	prefoldin subunit beta	13.3243	8.80239	1	33.7 (M.score:33.7)	1	9.40171	0.643786	217	MQNIPPQVQAMLGQLESYQQQLQLVIQQKQKVQADLNEAKKALEEIEKLTDDAVIYKTVGTLIVKTTKEKALQELKEKVETLEVRLNALNRQEQKINEKIKELTQKIQAALRPPTAG
218		TRUE	PFDSM3638_09150	30S ribosomal protein S3	23.4148	9.56705	1	33.6 (M.score:33.6)	1	6.66667	1.35303	218	MAIERYFIREAVREMLIDEFLEKELRRAGYGGLDIKKTPLGTKVIIFAANPGYVIGRGGRRIRELTRILEKQFGLENPQIEVEEIKNPYLNAKVQAVRLAQALERGIHFRRAAYAALRAIMNNGARGVEIRLSGKLTGERAKSIRFYQGYLAKVGNPAETLVSKGYAQALLKLGVIGVKVAIMPPGARLPDEIEIIEKPVEEEVVSNEAE
219		TRUE	PFDSM3638_07255	cation:proton antiporter	25.6517	6.51983	1	33.6 (M.score:33.6)	1	5.10638	0.0850967	219	MLKRVLAILTILVIGYWLAQGLADVPFGQDKMVVGKYYLEHVKEETGAVNAVTAVVVNYRGLDTLGEVTVLFIASTGVAALLWKKKRERTAKTEGSVVLTTGARLLFPFIALFGMYIFIHGHLTPGGGFPGGATIATAFLLMYLAFTIYEIPHRGFEVTEGLAGMGYVITGLIGLAIGGYFLFDWIWQTWGWGHENIGRLFSGGFIPIIYTLIGIKVGTELSGIVDNMLKEEVKE
220		TRUE	PFDSM3638_07730	DUF3417 domain-containing protein	97.6437	5.82833	1	33.6 (M.score:33.6)	1	1.1919	0.172559	220	MVKVENSIKKKIEKKLPENLKKLAELAYNYWWSWDDKAMKLWQRIDEDHWREYKNPVKLLLDVPESRLKELSRDDTFLDLYELVIERFNSYLNPETTWFSTNYPKWDKPIVYLCMEYGISKSLPIYSGGLGILAGDHLKTASDLGLPLIGIGLLYKHGYFKQEIDKNGRQIEIFPEYNISEMPIRQVLNEDGSPLLIDVPMENRIVKARVFLVKVGRVDLYLLDTDVPENNEEDRKICDYLYNAEPDKRIKQEILLGIGGMRLLKALGIEPGVIHLNEGHPAFANFERIRWLMDEGLSFEEALEVVRGTSVFTTHTPVPAGHDVFPADFVREKLAKFFEGLPAEKFLDLGRRFPGDSNFNMTVLSIKTSNFVNGVSKLHAKITREMWADLWKGVPIDEI…
221		TRUE	PFDSM3638_00915	ABC transporter ATP-binding protein	38.2962	7.64701	1	33.4 (M.score:33.4)	1	3.8806	2.42126	221	MAEPILKVENLKKYFPVRRGLLGALRGEPQRFVRAVDGVSFEVYKQQVFALVGESGCGKTTTGKLVMKLLEPTDGKIYLEGQDVTELRTKEEIKAYRRRVQMIFQDPFSSMNPRFRIYDILEEPLLIHGIGETRAEREELIYKALEMVKITPPEDYVNRFPHMLSGGQRQRVAIARALILNPTFIVADEPVSMLDVSIRAEILELMKELKEKMGVTYLYITHDLSTARYFADWIAVMYLGRIVEMGPAKEVIDNPLHPYTRALLAAVPEPIPERKDVIKEIPIKGEVPSAVNVPPGCRFHPRCVYFKEGLCDKKEPQLVEYSHNHWVECHLAGKI
222		TRUE	PFDSM3638_07220	NADH-quinone oxidoreductase subunit NuoD	44.6732	5.66416	1	33.4 (M.score:33.4)	1	3.32481	3.4206	222	MVSQEELIREARQNGMELYPIDKDTYELFFGPQHMATENFSIILKMDGNRVVKAIANPGFLHRGFEKLAEYRPWYTNIALLLRICVPEPDVPEAIYSMAVDEIIGWEVPERAQWIRTLVLEMARVTAYLFWIMGLSFKLGVYTAGQWAAAYRERFMALFEQLTGARVYHIYTIPGGVRRDIPGDKWLRQVRDTVEYLKDKLKDFDNVLFENYITYKRLEGIGVMDKKFALEEGVTGPNLRATGVAYDVRKSDPYLLYPELDFEIPVLKEGDALARVLVRRYELEQDLYIIEQLLDMGPPSGPYKVQDPKLKNLPRFKVPPGEAFAHVEATKGDFGAYVVSDGGHKPYRVHIRGPSIAHGVRVLEQLLVGARLADVPAILMSLDNCPPDIDR
223		TRUE	PFDSM3638_04890	acetyl-CoA acetyltransferase	40.9551	4.81896	1	33.2 (M.score:33.2)	1	2.57732	0.413452	223	MRKAIIVGVGMTPVGEHWRSSLRDLAVEAILNAMDDAGIDKVDSLYVGNMASGSFVEQENLGALIADWAGLGNIPAVKIEAACASGGAAVQEGAKAVLSGLEDVVLVVGVEKMTDAWPSDATRYLGYAADAEWELFHGASFVALNALIMRLYMNTYGYKEEDLALFAVNAHANGAKNPYAMFKKPITVETVMKSPYIADPLKLFDASPVCDGAAAVIITTPEKAKELGIPKDKWIEIAGMGRAIDTINLANREDFLTLKAATIAAERAYKMAGVKPEDVDFFEVHDAFTVMAALSLEALGVAKKGEGAKLAIEGQIAIDGDYPIQTMGGLKARGHPVGATGVYQVVEAVLQLRGEAPDGIQVPDAEVGLTQNIGGTGSNITVTVLRRV
224		TRUE	PFDSM3638_00030	RNA-binding protein	53.6377	5.84916	1	32.8 (M.score:32.8)	1	2.34542	1.54561	224	MSTESEIAVRIRGIYSTALTKLLMDRGFKIVQPSDVIAERFGIEKSYEDFDVDIYDKNHGVTIVGTKVEAVKKVFEEEFIDVFFRKLPYKLHGIYKGLVVKRDDRFVYVDIGNVIGTVLIEELPDAAEGDEVVVQVKKHNVLPHLSTLITIPGDYAVLIPKPIGVQRHVKISRKIKDPEERERLRILGLSVDLGEWGVLWRTAAAYKDWNTLRDELVRLSKIADKLKEAEKFSAPAEIIEGREIYEIEFGGGVKKKLDEIRNEVVPTIEGHHQFKSYDPEFTLAVDVAEGILAKLPSQRQKISKGFLEAIITSKGPKVGWIFTLNHVKPDGQIIKIGPGEVIEVSTDPLKVTIKRYLRPGKFYDGLEVPIESGDYAITEIEAGKWWFVHRYYDKDGNLK…
225		TRUE	PFDSM3638_10015	cell division protein FtsZ	39.9213	4.83413	1	32.6 (M.score:32.6)	1	3.49462	1.0733	225	MLKLVENVVGRVSEEENKVPEVQVPQSSIDEELKKIVEQIKARIYVVGVGGAGCNTVNRMMEVGVTGAKIIAVNTDAQDLLKVKAHQKILIGKELTRGLGAGNDPKIGEEAAKESERELRDALEGADMVFITCGLGGGTGTGAAPVIAEIARKMGALTVSVVTLPFTMEGIRRAKNAEYGLKRLVKYSDTVIVIPNDKLLEVAPKLPIQMAFKVADEILVQAVKGITELITKPGLVNLDFNDVRAVMKDGGVAMIGIGESDSEKRALEAAEQALNSPLLDVDISGATGALIHISGADVKLEEAQQIIEYVTRNVDPKAQVIWGIQLEPELEKTIRVMVVITGVTSRYITPEEETPLETPEESPSIEISIPEL
226		TRUE	PFDSM3638_00045	class II glutamine amidotransferase	29.7591	5.28402	1	32.3 (M.score:32.3)	1	3.80228	0.233118	226	MCRILLAVGEGQRIVPWIEAFVKASENDPYKEARGKGRSHKDGWGYVLITEDYVKHYKSRRPVFEDEEVDELKGSISNFSVLMAHSRAASQGSVETFNAQPFSFGSPHGYQLYFMHNGDLNKSMLLEALKLPAEKFLNVSDSYVAGMYASLFITSQEDEEIVKAISALKEVVNTSLNVGMILASPGKLKVVGVAYMREEFLERKAERDYMRLISFPDSDLFVLASSTLELYTYFPVDDVPNATLFALDVNLKEKEFEVRKYSF
227		TRUE	PFDSM3638_05695	restriction endonuclease	80.0414	5.68755	1	32.0 (M.score:32.0)	1	1.9802	7.63165	227	MGKWSDDILINASKESLIPLILELLKRTGFRESEKVSEEWGFDIVGIRDDPLSGTEKVLLKIHTSGMLSSKDVNVFADVLRTHKADKGIIVVPYGVTRDARILISRDYKGLIVTWDRKKLISLFERYGIEPPEELLQKREEEPKKEEPKLKPIKLDAPLLFDVSAEDLFRKLMGFLSSRYPIKREVVSIEELKVKLSVGYILSWSANERKGKGVVLSKEEIVLDATEDEKLKNNVSKALLNDYSVITATDKEIDVTMTLTEAVVLFKEFAAKNLGLLESDISIVDRKRVYLPVEAYFKLKIGDNEGKATIDLKSGEINVEITPLSQEYLVGKVKEIVVEKTGEEVKGVRTEERKGKIRVYGSTERFKFEFVVNVYTGEVLSEEIVLTDEAIVEIIKENY…
228		TRUE	PFDSM3638_00910	ABC transporter ATP-binding protein	35.8457	6.20933	1	31.6 (M.score:31.6)	1	3.44828	1.50334	228	MAKKILEVKNLKMYYFTSRGPVKAVDDVTFDLEKGEVLGLAGESGCGKSSIGFTLMGMPQPPGRIVGGSIKIDGREIVGLPEDVLRKEIRWQKISMIFQGAMNALNPVYTVGYQMIEPLIYHKGMEREEALDRAMKYLEMVGLDPEVVYRYPHELSGGMKQRVVIAMALLLEPDIVIADEPTTALDVVVQAQIINLMKRLKKKLGLSMIFITHDLSILAEISDRVAIMYAGKIVEIGPSEKIYYEPAHPYTQKLLAAIPRLHEDVEKLEFIPGSPPNLINPPSGCRFHPRCPYVMDRCKQEEPKLIEVDKDHYAACWLL
229		TRUE	PFDSM3638_07990	signal peptide peptidase SppA	37.2886	5.5581	1	31.6 (M.score:31.6)	1	3.03951	1.73395	229	MPEGVWKYISFILALVLSFSIAANALLYLQVGELQSTTYKLQKILPSQTNITTNYTTLQLKIEELKKEIEYLRAYIQKQNETANGSLAIVPIFGLIDENMALEVVKKLEVIKSDPSIRGVLLWIDSPGGYIGPVRAIYKEVKELAYIKPIVAYISGYATSGGYYIACGADKIIADPYAQVGSIGVIYVHFNAQKYYEMNGIEVEVFKTGPYKDMGADWRGLKPEEREIIQKQIDVYFKTFLDVVMEGRNLNETKVKEYADGRAWFAYEVNGTLIDDIGDLQYAIEETKKLANLKSANIVIFDVKPSNFEIRGSSALYLPQEYVYKYIRR
230		TRUE	PFDSM3638_06275	hypothetical protein	12.4796	7.8914	1	31.3 (M.score:31.3)	1	13.0841	0.263489	230	MNPENKMMLMAYGIFAIAGIISGILGAYAPLGWIIGWIIYILAPKLLLNLVPDLPEELRNERVILRKTFWSFFFFWLYFTGLTYTLITNYEPVAYYEKALYYNITKG
231		TRUE	PFDSM3638_08715	hypothetical protein	26.124	4.78307	1	31.1 (M.score:31.1)	1	4.95868	0.863951	231	MRRGLSLLGFIIGAVIGIIIGALILAGIFLLALGSTISFLDFPNCHCTCETINNAGPIKEIGAYNATSLIIEDVIGTVKIKPSNEPQIKVLSNLPINVSVSEDSLVITCSECREKSFKNGEIILMGNLSSIKTSDILGRLIVEVPTKRIEVGDVLGEVNIQAYTEVFESEDILGRAEIKATREVQIEDVIGEVKITIPKNSTAKISYSKIIGKIADLSEDSNKIVKVDIEDILGELTVENEK
232		TRUE	PFDSM3638_04885	hydroxymethylglutaryl-CoA synthase	38.1767	7.75457	1	30.8 (M.score:30.8)	1	2.57143	0.198847	232	MRKVMKPMKDVGIVGYGAYVPMYRIRNEEIGRVWGVSSFPIEEKAVPGLDEDAITIGIEAARNALKRAKIDPQKIRAIWFGTESKPYAVKPSATIIAEAIGATPDLEAADFEFACKAGTEALQAAIGFVGSGMAEYAMAIGADTAQGRPGDHLEFTAGAGGAAFIVGEKSNESVAYFEGSYSYVTDTPDFWRRQHEHYPRHGNRFTGEPAYFHHIINAAKTLMEELGLKPSDFDYAVFHQPNVKFPLTVAKILGIPKEKVLPGLLTGRIGNTYSGATMVGVSAVLDIAKPGDRILWVSFGSGAGSNAFSIVVQDAIEEKRDLAPKVEDYVKRRKVIDYALYAKARRKYIL
233		TRUE	PFDSM3638_06500	DUF2101 domain-containing protein	27.7731	9.20635	1	30.8 (M.score:30.8)	1	3.82979	0.420597	233	MKLEEFLYLLGEKIEVGIWKIFYITKNLLLPSPSQELPRSILGRLAKRAKTPHELLSLKLQLVFLVYLIFSLLLVFMNFWKIFIVVAFFYFLYLRYLLITNREFFIDYQPYRAFYLSLSIIATISYGGFIIVREYSTSPYHYYIYLLAVLATVLVFRHWFKSKYGRDYTYGVVEEVKGDLVRVYVHDDIAANVKPGYYWLPAVPDAEPGRIVKILVEEQTLRGAKPVRIIEVYME
234		TRUE	PFDSM3638_04275	type 2 isopentenyl-diphosphate Delta-isomerase	41.1947	6.64266	1	30.5 (M.score:30.5)	1	5.08021	0.795136	234	MDEGTRTVLRKFEHIEHCLKRNVEAHATNGFEDVHFVHMSLPEIDKDEIDLSVKFLGRKFDYPIMITGMTGGTRKGEVAWKINRTLAQAAEELNIPLGVGSQRAMIEKPETWESYYVRDVAPNVFLVGNLGAPQFGRNAKRKYGVKEVLYAIEKIDADAIAIHMNPLQESVQPEGDTTFSGVLEALAEITSSIDYPVIAKETGAGVSKEVAIKLESIGVSAIDISGVGGTSWSGVEYYRAKDELGKRLALRFWDWGIKTAISLAEVRFSTNLPIIASGGMRDGITMAKALAMGASLVGIALPVLKPAAKGDVEGVIKVIKGYVEEIKNAMFLVGARNVEELRKVPIVFTGFVREWLEQRIDLQEFVKKRGKVKI
235		TRUE	PFDSM3638_09695	translation initiation factor 2	23.4404	6.77917	1	30.3 (M.score:30.3)	1	6.31068	0.487578	235	MEEYYVCPECGSEDVEVIKERGREVTLRCNECGYVWMITLPKLREIPVIVSKHERSFREKAVLPEDEVIKVGDVIEIENDQVKVLSIELPGGKRVRKAKVAEIQTIWGESLTYPKVFGVSIYLPGGITQSFKVVVDREEEFVVGEVIEVGGYTFKVEMIKTEKKLMRSGKAKAENIVRLMGHAIKGRARRKLKIYEGYDSISAENQ
236		FALSE	PFDSM3638_00820	TrkA family potassium uptake protein	25.4387	5.40728	1	29.9 (M.score:29.9)	1	3.91304	0.162687	236	MYVIIMGAGRIGTLVAKMLENSGHDVAIIEMNKDRARAVSDIVSGLVIEGDATDQNILESANVRNADAFVALTGKDDANILACILAKHLNPRIMTILRITDPRKKKIFEEVKDLKKYFDVVVSPEDIAANYIFRVVITPGFDRVLLPREGAEIIQFHIDENSKVAGKAVKDLNLPRDSLIIAIYDEKGNLIIPSGETILPKRGTVVVFAKDSALKEIKKIMEEKVEESEE
237		FALSE	PFDSM3638_07180	CO-induced hydrogenase subunit K	35.3647	9.47445	1	29.9 (M.score:29.9)	1	4.36137	0.394971	237	MKIVYGVIGLILIYIYVSVVSLLFSGIDRKLVARMQRRIGPPILQPFYDFLKLMSKETIIPKTANFMFKAAPILMLATVIALLAYTPLGFPPIFGTKGDIIVFIYLLTLADFFLVVGVMSSGSPYGRIGAARGIALLVSREPAMMLGVFAVMWAISKLGVEKPFSLSSLYEHTIWDFGPVAWVAGVVLIYVFMAWLASEIEVGFFNIPEAEQEIAEGTLVEYSGRYLGIIKLAESIKEFIAASLVVAVLFPWQLNIPGVQGYLINLLLHTLKVFIVLLVSKTIFRTITGRLKISQAVNLLWTRVFTASVIGALLLALGVML
238		FALSE	PFDSM3638_09180	50S ribosomal protein L3	41.3635	10.1266	1	29.6 (M.score:29.6)	1	4.10959	0.921234	238	MGKVHRPRRGSLGFSPRKRAKSIVPRIRSWPKETEVRMLGFAGYKAGMTHILMIDDEPGLTNGKEIFMPVTIIETPPLRVFGIRAYRMGYLGLETATEVIVPDFPLDNYPAKERKGKPKPKMTFYKLLERRIATLPKNYTQEMFEQKLGQLEDMIKEGEIVDVRAIVATQPWVIKLKKKPEVMEYAIGGTSVEEKFNYIKEKLGKELRVGEVLKEGELLDVIAVTKGKGTQGPVKRWGIKLRAHKDSKGRRKVGSIGPWHPARVMWTVPMAGQMGFHHRTELNKRLIAIGENGKLKLDENTEIEITPKGGFPHYGIVRSDFMMIAGSVPGAIKRIIRVRPAIRPPKKKPPVQRPQITYVSVESKQ
239		FALSE	PFDSM3638_06825	30S ribosomal protein S28e	8.09545	9.95051	1	29.6 (M.score:29.6)	1	11.2676	0.498335	239	MAEDEGYPAEVIEIIGRTGTTGDVTQVKVRILEGRDKGRVIRRNVRGPVRIGDILILRETEREAREIKSRR
240		FALSE	PFDSM3638_00810	preprotein translocase subunit SecF	32.3764	5.04198	1	29.5 (M.score:29.5)	1	4.39189	2.48788	240	MPEVDNVIKEKLKLLVEMDPKKMIIYPLIVFGIAIIIIIANYVMTGSFVKEGIELRGGSVITLQGVNVSPDEIAKSIKEKTGIDVTVEKFSGVGGSGVRVYVSAGDDVNLVREALKEMFPDVEPQTVVIGPTFGEIVREQGIKAIVYAFIGMAIVVFLFFRVPVPSMTVVFSAFSDMIIAIALMNIFGIELSQATIAALLMLIGYSVDSNILLTTRLLRRKEFTVEEAYYSSLKTGFTMSTTTLGALASLWIFSTAQVIDDIASVLIFGLLADFMNTWILNAGVLRLYIAKREGKE
241		FALSE	PFDSM3638_09560	hypothetical protein	22.0616	5.13074	1	29.5 (M.score:29.5)	1	4.52261	0.133406	241	MKSAKTIFILGIIAIILSSGCINTKVTTQTAIGEKVERVCLTNEVVGSFEVPQEIREEVEKLFSEASVKGFTVNVILDNSTLSLTFYEFRPSFLPQDFEVAVDGRQLKNTMYLLADEVSVAIAYNNQTFRGKVRIIPKERGEFTYKAKLDEISGEVLLGSFGTKTPEFQVYARKISENTVEVMVKKDDEIVASGVISLG
242		FALSE	PFDSM3638_08910	2-oxoglutarate synthase	31.0962	9.18275	1	29.5 (M.score:29.5)	1	3.20285	0.554859	242	MKLVSAYEIRDKYLRKDMLPTIFCPGCGIGSVLQFTLRAIDDLGLDPDKIVWVSGIGCSSRVPGFVNFDGLHTTHGRALAFATGIKLANPELKIIAFMGDGDAAAIGGNHLIHAIRRNLDVTVILINNFTYGMTGGQVAPTTPKGLRGTTAPYGQFENPFDIAQLAVAAGANYVARWTVFNYIQGINSIKKALSKEGFTLVEFLSPCPISFGRRNRMKSAPEIIRWYQEITVPISKAKNMKPEELEGKIVIGEFVDRDRPGLVREYMEYIKRAKKIMGWEE
243		FALSE	PFDSM3638_05720	ribosome biogenesis protein	7.2188	10.1057	1	29.3 (M.score:29.3)	1	18.3333	0.258216	243	MRFRIRKCPKCGRYTLKEVCPVCGEKTKVAHPPRFSPEDPYGEYRRRWKREVLGIGRKEK
244		FALSE	PFDSM3638_10345	DUF2666 domain-containing protein	28.8817	6.81078	1	29.2 (M.score:29.2)	1	4.7619	1.21606	244	MIERILEFTAKHEEWIVGENVEDFTNENIAMFLSRVSNTVSSKIPGYLGEKIDVNGLLSIKIEGSLEEKLKALISPKVSRQIGRLVMEDDKKLKKLLVEVAKAVLTREILKNELPIEFPGGKIEGLKIQPRYEEDHINFTARYGSWIVVKRMIIDEKTPLLDIARLLASINETAVNKIKDFADVDDKKIVEYFGGFKKVKKEEEIKEIVQLFREFKGNEFEVRYAAREMLSKLGLKVDVPSKNLEKYLEKAG
245		FALSE	PFDSM3638_03055	hypothetical protein	13.6565	8.89062	1	29.1 (M.score:29.1)	1	9.6	0.706405	245	MEIDKGLAKFGDSLINFLYSLALTEFLGKPTGDRVPNASLAIALDLTGLSKNLRRVDKHAKGDYAEALIAKAWLMGLISEREAVEIIKKNLTPEVLDFSKKKEAIGRALAPLLVIISERLTSSQV
246		FALSE	PFDSM3638_03960	capsular biosynthesis protein	46.0278	9.17057	1	29.1 (M.score:29.1)	1	2.75	0.804158	246	MKLEIEPYKTSKIVLMLLANNFYIDPRVRQEAESLIKAGFTVHVFCWDREGEAEDTNIDNKLIVRTMKILTSKEFNKLKYAVAAILLQILGFFYGIKLIRKYRKIIVHANDFNTLLAAYLLKMFFRKRVRVVYDCHELTPNVYKDWYGTLVGKVAEKLEKLLIKCADVVLTVSEPVASYLRTITNAPVYVFYNYPSEKYIPMIDKMEAREILGLPKDKLIIAFVGHIRPDTAVKELVEATEILKKKNLQNKVRFVIVGGGPSKDEIWNFVKEKNLEDIVSLVPMVPREKAILYLCAADISYVVFIEGINTRIGMPWKLFESLACGTKVIVSNKTYMANFLKSIDYPSIIINKISPKEIAEALEKELENRGNRDSKKRAKFLWESQEGEFLKIYENLGGLL
247		FALSE	PFDSM3638_07965	DNA topoisomerase VI	44.0451	8.28468	1	28.7 (M.score:28.7)	1	2.35602	2.56109	247	MKLKRGKPKEKFSYDPQKVLKKLEDLAYKILEEVKAGKNPYFDVPTRGLSNVYFDEEARLIKLGDKLSRRYFLNVAHARKFMQTLILMAYVKRLVSEGKHASLREAYYANKHTIPGTHENTFEDQSESDPIIEDLERMLGVLREEMHITADRRGYVYGDIVIKDGEDEFNASKLGMGGWAVPGTVEHIQFPEINVDYVLVVETAAMADRLIEEKYPKRERALIIATQGQASRGVRRLIHRLHYEEGLPIIVFTDGDPYGWYIYSTIKQGSINLAYLSEKLATPDAKFVGMTMDDIKEYGLEHVTEKLKGIPPDKKGGPTGDYKRLIEELNYPWFQNKEWQRQLKLALKWGVRIEQQALANKSLEFVAKEYLPEKIREGKLLP
248		FALSE	PFDSM3638_10150	elongation factor EF-2	82.2029	6.27341	1	28.6 (M.score:28.6)	1	1.77596	1.46012	248	MGRREEMIAKIKELMLQPERIRNIGIAAHIDHGKTTLSDNLLAGAGMISEELAGKQLVLDFDEQEQARGITINAANVSMVHNYEGKDYLINLIDTPGHVDFGGDVTRAMRAIDGVIIVVDAVEGVMPQTETVVRQALREYVKPVLFINKVDRLIRELKLTPQQMMERFSKIIMDVNRLIQRYAPEEYKKKWMVRVEDGSVAFGSAYYNWALSVPFMQRTGVKFNEIIDLTLKGDNKTLRQRAPLHVVVLDMVVRHLPSPIEAQKYRIPHLWQGDINSKIGQAMLNCDPKGKMVMVITKIIIDKHAGEVATGRVWSGTVRSGQEVYLINSKRKGRIQQVGIYMGPERINMEAVPAGNIVAVTGLRDAMAGETVAEEQIEPFEALHYVSEPVVTVAIEAKN…
249		FALSE	PFDSM3638_01285	alanine--tRNA ligase	104.853	5.84403	1	28.4 (M.score:28.4)	1	0.765864	5.67439	249	MEFVMKTRMFEEEGWIRKTCKVCGKPFWTLDPDRETCGDPPCDEYQFIGKPGIPKKYTLDEMREKFLSFFEKHEVYPHGRVKRYPVLPRWRDDVLLVGASIMDFQPWVISGEADPPANPLTISQPSIRFTDIDNVGITGRHFTIFEMMAHHAFNYPGKHIYWIDETVELAFEFFTKELKMKPEDITFKENPWAGGGNAGPAFEVLYKGLEVATLVFMQYKKAPANADPSQVVIIKGEKYVPMETKVVDTGYGLERLVWMSQGTPTAYDAVLGYVIEPLKRMAGVEKIDERILMENSRLAGMFDIEDMGDLRYLREQVAKRVGISVEELERLIRPYELIYAIADHTKALTFMLADGVVPSNVKAGYLARLLIRKSIRHLRELGLEVPLAEIVAMHIKELS…
250		FALSE	PFDSM3638_06880	30S ribosomal protein S10	11.7414	10.2275	1	28.3 (M.score:28.3)	1	8.82353	0.564517	250	MQKARIKIASTNVRSLDEVANQIKQIAERTGVRMSGPIPLPTKRIRITTRKSPDGEGSATFDRWELRVHKRLIDIEADERAMRQIMRIRVPEDVTIEIELIS
251		FALSE	PFDSM3638_00755	hypothetical protein	21.5307	5.72868	1	28.2 (M.score:28.2)	1	6.38298	1.23531	251	MEINEFISQLKLGETVLVEHSSYSKPELLFYGIIKESRMPVVIDDILDTLFEYYNKLKVWGYDLTVFDKVYVIKAGGNEVIGNLLGKLEVGKYVIEAREYTKIIKEVNPPIINPVLGVHKLILLGNLLENLRLLKEISTYVGNENRVAIYFVNRDVVESHSPAALKLLEEISTSVFQLNEENKIKRMK
252		FALSE	PFDSM3638_01275	cation:proton antiporter	40.9108	9.04133	1	28.1 (M.score:28.1)	1	2.13333	20.4544	252	MEVLLLLSLMLAVAKIMGYIFERLGQPAVLGQIFGGLLLGLFIETNPVISEFANLGVLLLLFIAGLESELEEFKKVGKRSVIVAVFGVVVAFLFGFLVALPFTSFERAIIYGALMTPTSVSITVKVLMEMRKLNTIEGTTILAAAVVDDILGIIVLTFAISIARRVSIEYLKVMEVLVSVSALIFFFLYFGPRLAETFFRRLRIIDLPEVETAFAIVFLVLFSYLAEHLNLASILGAYLVGLAIGQTSQKKVILDHVNILGYSLFIPVFFVEVGMKMKAHHLLHVSSFAILYTLMAIVSKIVGCGIGAKLSGFNWRSSLKIGVGMIPRMGVELAMLSIAISAGVMDLASLTVIVVMVFVTTLITPPLLKVVYMKT
253		FALSE	PFDSM3638_02310	glyceraldehyde-3-phosphate:ferredoxinoxidoreductase	73.901	6.33504	1	27.8 (M.score:27.8)	1	1.37825	1.58075	253	MKFSVLKLDVGKREVEAQEIEREDIFGVVDYGIMRHNELRTYEVDPYDPRNIVIFGIGPFAGSVLPGSHRLVFFFRSPLYGGLFPSTMGGAGYQFKNVGVDFVEIHGKAEKPTVIILKNDGEKLSVDFYEIELEKLLDVWKEYKGEEGVYALTQYLLDNLASVFEGMEFRIAVVGPAALNTNMGAIFSQALRNGKRAVGSEDWAARGGPGSVLLRAHNVVAIAFGGKKRKREFPGEDISDVKVAKRVVEGIHKKAQRDVINESTVKYRYNPKLNTGGTFGGNYPAEGDLVPVLNWQMPYIPKEERIKIHELIMKYYWEPFNKESIQPKNWTTCGEPCPVVCKKHRKGHHVEYEPYEANGPLSGSIYLYASDISVHAVDAMGFDAIEFGGTAAWVLELVH…
254		FALSE	PFDSM3638_07550	photosystem reaction center subunit H	10.3587	4.6424	1	27.4 (M.score:27.4)	1	16.3043	0.145129	254	MVKIRASKLRDVELITDTGVRLGWVYDLLFEEEGEEKGKILAILAEPDEDIDISKFRITEDELLIIPITAVKSIGEVIIIDSSKLAQVIRAR
255		FALSE	PFDSM3638_03945	asparagine synthase	63.0198	6.82595	1	27.4 (M.score:27.4)	1	1.6791	2.11576	255	MKIDIKFRHNYGYLWYEKQGIYVKGYVIHESTLYQKEDLVKLLLEHLEKGVKLENILTTFYGIFSIAIKTDDKIHLISDTTRTFPMFYAVANDEILISDDTFFIKKKIDGQYNKDLKTEFLRCGYVTGPETLINGVYQVQAGEIVVISEDGQIMRKFYHDYTVTQDELLKDSSDALKKEFLKILDKAIKRLILMANGDTIVIPLSGGYDSRAIATMLKKNGYENVILYTYGKPDSTEVRVAREVAKNLEFEWIFVEQNEDIVDPDYPERDFFLEFYKYAFNHVSTIHLQDFFVFKHLHDNSVIPKNSIIVPGHSGDFLGGSHLRKLPIPKSKRDVFNTILIKHYIVNEHIKLSPYVVKKINEYLNSFSEHTLPYSLDDNWNMKERQAKFIVNSNRTYEF…
256		FALSE	PFDSM3638_09465	AAA family ATPase	89.152	5.64323	2	27.4 (M.score:27.4)	1	1.00503	0.0776736	256	MSEKKKEVKLKVASAYQRDVGRGIVRIDRKTMRELGISPGDVVEIIGTKNTAAIAWPAYPEDEGLGIIRMDGTIRKNAGVGLGDEVIVRKADVKEARKVVLAPTEPIRFGRDFIEWLHERLIGRPVVRGDYIKVGVLGQELTFVVTTTQPAGVVQITEFTDFDVSERPVKEVEKRITTGVTYEDIGGLKDVIEKIREMIELPLKHPELFEKLGIEPPKGVLLYGPPGTGKTLLAKAVANEANAYFIAINGPEIMSKYYGESEERLREVFREAEENAPAIIFIDEIDAIAPKREEVTGEVEKRVVAQLLTLMDGLKSRGKVIVIGATNRPDAIDPALRRPGRFDREIEIGIPDKQGRKEILQIHTRGMPIEPDFRKDDVLKILEELRGEEKFKDVIDRAI…
257		FALSE	PFDSM3638_08330	DNA-directed RNA polymerase subunit D	29.7627	4.8839	1	27.2 (M.score:27.2)	1	6.51341	0.150133	257	MAGIEVQILEKKEDSIKFVLKGVHVSFANALRRTILGEVPTFAVDEVEFYENDSALFDEIIAHRLAMIPLTTPVDRFELDALELDDYTVTLSLEAEGPGIVYSGDLKSDDPDVKPVNPNIPIVKLAEGQRLVFNAYAKLGRGKDHAKWQPGFVYYKYYTIVHISKSIPEWKELKKLAKKRGLPVEETEEEVLVTTIKPFYIPKDFEEYEGKEIWEEIVPNTYIFTVETNGELPVEEIVSIALKILMRKADRFISELQKLTS
258		FALSE	PFDSM3638_05320	methyltransferase	45.23	5.9125	1	27.2 (M.score:27.2)	1	3.58056	1.57671	258	MVDLTLITEEAVKLAEEMIRKGYDIKKIKRALKLPEEEFNIALEVAKARIKAKDKFSRNDLWFDLEGLRYATHEMVADYRGKRLKEQGVKSVADVSCGVGIQLIFFAKHGIESIGVDIDPIKIEFAKRNADKYGVNIKFIVGDSLDPEIVEKINAEVIFSDPARPPEVPERNLEDLLPSPLKVYEAYKEKTESFIFDLPPQIRREKVPWKGEFEYIDLYGHVNRLTFYTEPLAKAERSAVLLPQGARLESNPDLENIVEEVDEPGRYIYEIPQGIDYADLINELFHTVRGELKLLLREKRRILATSDEEIKCKYFKRAYVVVKTMPFHPVRINDFLRKEGYGRATLRISVPEEEYWKIRRRIEANLSGEKRAFVFNVKGLAVIAEEVHQDQ
259		FALSE	PFDSM3638_09160	30S ribosomal protein S19	15.3144	10.4387	1	27.2 (M.score:27.2)	1	12.8788	0.60116	259	MARKEFRYRGYTLEQLMNMSLEELARLFPARQRRSLKRGLTPEQKKLLRKIRLAKKGKYKKPIRTHCRDMIILPEMVGLTIYVHNGKEFVPVEIKPEMIGHYLGEFAPTRKKVEHGAPGVGATRSSMFVAVK
260		FALSE	PFDSM3638_07700	pyridoxal 5'-phosphate synthase lyase subunitPdxS	36.8763	5.76254	1	26.9 (M.score:26.9)	1	3.58209	0.174765	260	MDKMKIIMEKGTERLKRGFAKMVKGGVIMDVTNAEQARIAEEAGAVAVMALHKVPADIRKAGGVARMAPVEKIQEIMDAVTIPVMAKVRIGHEAEARILEALGVDMIDESEVLTPADPFFHIYKKKFTVPFVCGARNLGEAVRRIWEGAAMIRTKGEAGTGNIIEAVRHVRLVNENIRLIQRMTDEEIYGVAEKFAEPYLRLAFSVKEISGLPKRVLENEPIYEGFTYREIVDGLYKILLEIKKLGRLPVVNFAAGGVATPADAALMMAMGMDGVFVGSGIFKSSNPPAMARAIVEAVNHWDEPDVLAEISREIGEPMRGQDIAELEVRMEERGV
261		FALSE	PFDSM3638_08215	DUF402 domain-containing protein	19.4231	4.95931	1	26.9 (M.score:26.9)	1	6.66667	3.40009	261	MRKIRLVYRRFPNRVIMREDEVIEDFGDVIVAKSEFTGMLAPLRVNGVEVINNGYKMVYFAFIGRDFDVLKIYDPSGNFKGLYVDVLDYTRREGNTVEILDLFLDIFIFPEGEYYLLDEDELEMAFNYGIISREKLLKAYDTAERIIGQIKRGKFPPKIVWEYSL
262		FALSE	PFDSM3638_01350	regulator of amino acid metabolism, contains ACTdomain protein	22.134	9.13746	1	26.8 (M.score:26.8)	1	6.73575	2.01058	262	MIHIIEEYFRPYPARKKVAQILWEAGMSVKDGKIYVKGVEVPISGIAQVAGVNRKIVYHTIEYIESKPALKLLFENLSPRTSLISIAPLMGWEVLELTIQKGKYEKTLAKVLESLAERRVRVIEIFGSNPYEEKSKAFLVVEGIVPFEVISSLREEGSLERIVIHTPEKEKERMICPKCEIKYCPRKIFISTR
263		FALSE	PFDSM3638_08085	glutamate dehydrogenase	47.0842	5.45321	1	26.7 (M.score:26.7)	1	5	1.42614	263	MVEQDPYEIVIKQLERAAQYMEISEEALEFLKRPQRIVEVTIPVEMDDGSVKVFTGFRVQHNWARGPTKGGIRWHPEETLSTVKALAAWMTWKTAVMDLPYGGGKGGIIVDPKKLSDREKERLARGYIRAIYDVISPYEDIPAPDVYTNPQIMAWMMDEYETISRRKTPAFGIITGKPLSIGGSLGRIEATARGASYTIREAAKVLGWDTLKGKTIAIQGYGNAGYYLAKIMSEDFGMKVVAVSDSKGGIYNPDGLNADEVLKWKNEHGSVKDFPGATNITNEELLELEVDVLAPAAIEEVITKKNADNIKAKIVAEVANGPVTPEADEILFEKGILQIPDFLCNAGGVTVSYFEWVQNITGYYWTIEEVRERLDKKMTKAFYDVYNIAKEKNIHMRDA…
264		FALSE	PFDSM3638_05635	type III-B CRISPR module RAMP protein Cmr6	38.7177	8.92255	1	26.7 (M.score:26.7)	1	4.70588	0.231779	264	MKEVVKLVLLGERQNSLNLSLYFNKYPPTIIYPEVLEDRNKKLASPSGSQRKISLLVLNQGVLQFNKIKETIEKSLPIETKVKLPQKAYELYKKYYQDYTDMLNSLHAITGKFKTQSRLVVGLGDESVYETSIRLLRNYGVPYIPGSAIKGVTRHLTYYVLAEFINEGNDFYKRAKTVQDAFMKGDPKEILSNAKVPERCSRLCKEFLRIFGEKKVPEIIDELIRIFGTQKKEGEVVFFDAIPIAEEIADKPILELDIMNPHYGPYYQSGEKNVPPPGDWYDPIPIFFLTVPKDVPFLVAVGGRDRELTEKAFSLVKLALRDLGVGAKTSLGYGRLVEYV
265		FALSE	PFDSM3638_06355	urea amidolyase	36.5872	8.9986	1	26.5 (M.score:26.5)	1	4.55927	0.408032	265	MIEVLSVITSATVQDLGRWGYQRYGVPVSGVMDEVSARIANYLVGNPDNTPLIEFTAGGISIKFHTSAVFAVTGDATLYLNDTQLEPWESYWAKRGDVLTVRLSKGMYGYIAFSGGIECRKILGSCSTYLRAKFGGLLKPGDKLKLGYSLLTGKAGKRLPEELRPRFDKTVRVILGPNIEHFTPEGMRTFLTSEYTVTPESDRMGYRLEGPRIEHSEKGADIITEPIPRGAIQVPANGKPIIMLADAQTTGGYAKIATVIRVDIPMVVQTRPGEKLRFKAVSVNEAVQELRKRERIMNAIRKALQDEWNLYRIKVGKEEFLIFAGMEED
266		FALSE	PFDSM3638_02740	hypothetical protein	48.8713	6.91856	1	26.4 (M.score:26.4)	1	4.18605	0.766111	266	MVIDEILELVPSIPDPFVRVLTYGRIGVYLSKIKDPRAGKAFRKAFEELSKIEDPYILVRALLAIGYSTSLAGLKSAKKAFREAISSAQLLPEEIQDIVKAEAIDYLLSLKDTDEAVFYAVEIKNKKLRNKKLLEILEKVLENLEGEKLNKIYKRRKVLLILETIEEPYREEAIVKSIKPLLSLGEYKLVLELINSIGSKLWIAQALNEVLEFLKNNEENSEIVKILIEESEELAKKVGEDIREDIAYIFAIHGFIQQSIEVLKTIPPTTQRIIVREILTSLLSKEDLDKLKILMESLPPDMVLMVKDIIFRILERGSPKMEPMIQVLLEKEGISEDILVGITKYYLELNNLQQAVRVIKRINSERHRSVALGFLAHYLIRIGRVGDAIDVVLNIKDRG…
267		FALSE	PFDSM3638_10475	adenylyltransferase	25.5327	5.56568	1	26.2 (M.score:26.2)	1	3.47826	11.0168	267	MLSERELERYDRQIMIFGIEGQEKLKKANVAVVGVGGLGSPVAYYLAAAGVGTILLIDEQTPELSNLNRQILHWEEDIEKNPKPISAKWKLERFNSNIKIETFVGRLSEENIDEVLSGVDVIVDCLDNFETRYLLDDFAHKKGIPLVHGAVEGFYGQVTTIIPGKTKRLREIFPKVKKKGKFPIVGATAGVIGTIQASEVIKLITGYGEPLANKLLIIDLANNTYEIIEI
268		FALSE	PFDSM3638_00830	V-type ATP synthase subunit I	75.3964	6.21851	1	26.1 (M.score:26.1)	1	1.20664	0.458548	268	MFKPEEMVKIELISLARYRDIIMTYLHERGVVQLEEVPIEDIQHDAPNEYYRKATSYSITMGRLVDTLKGFLPPRKTSIKEFIFPKEREKRVYTYRGIEDLVKDVEKFLSEVEPKIREVETQLTAINNRIANIREIINTLELLSSLNIEIEYLIPGSFLAIEVGKIERERVEKLIGELKNELGDKVFILRRDLGTISLLVVVTLKEFQGKLTSILAKYGFEKVEIPRERGHPRELIPKYNELLKEEMKKLEEIRKKGREFAEKYYEDLVFYKELMDNERDKANYLSYLARTELTVALVGWLPKKNVEEVVEGIKNLTGGKVYINIREPEPNEIEEVPVKLKNPEFISQFEMLTEMYGVPKYNELDPTPILAFTYSFFFGFMLTDFMYGLLLGIVSALLV…
269		FALSE	PFDSM3638_09880	ribonucleoside-triphosphate reductase	14.6458	7.79719	1	26.0 (M.score:26.0)	1	6.34921	0.820323	269	MKINDIIRENIEKDGLWLVITFKTPYGPRDTLEILERAIRESGWDVTFSANWWTADIPYGLARVDAKKNGKEKIVLGKWVLGKSCKIIKVENLDLEKGKEEFFRMVDSIASTLIHDPVIRTMREQY
270		FALSE	PFDSM3638_01475	glycosyltransferase family 4 protein	37.4794	9.54153	1	25.9 (M.score:25.9)	1	3.27381	9.85076	270	MRILLVGHYPPHKGGVARHVKQLKECLEKRHEVYVLTYGTVAVEEENVYSVKVPNIFGIRGTSFALLASKKIVKLHEKYNFDLVHAHYVGTTSFAGVLAKRKTGVPLVITAHGSDLEFMSRLPLGGYFVKTSIMEADYVIAVSHYLAKKALELGASRISVIPNWTELSGESERKYILFLGRVASYKGIEDFIELAKRFPGEEFVVAGEGPLLKKLRAKSPPNVKFLGYVPAEDVLKKAKVLVLPSKREGFGLVVIEANSFKVPVLGRNVGGIRELIRFSKNGYLFEDIEDAITYLKTLLVPKTNVKLGSIGKRISKGHSQEKMCERVEEIYREVIS
271		FALSE	PFDSM3638_00160	hypothetical protein	24.5411	8.55256	1	25.7 (M.score:25.7)	1	8.55856	3.04976	271	MDKLTKVVLIAIVIIGIVGVAITLSVKHYQGGEIYEASNDAMNYLVRGFNVTIKVETVDGKIISGELFSAQGSTITIIVNGTRVTVGGPAATKENFRAKHIEVIKRGKVYVYEVPGTEGEGYEEFSKYIKEETYSERFSGTIYVENISIIEIGKLKYLADYTTYGSITINKISGNNAILTASMVPVEILRDNLKGKRVFFYGILLVNSENRTHKLTLIEVRS
272		FALSE	PFDSM3638_10115	FAD/NAD(P)-binding oxidoreductase	54.9111	5.92393	1	25.6 (M.score:25.6)	1	3.02419	0.767176	272	MIKVAIIGAGITGASIARVLSRYENLEVHLIDKNPDVGWGVSKANTALIHGGYDDDPDKYPMRAKLCVRGNRLWHRWVKELEIPHIWNGALVVALEEEDFDELEKLLERGIRNGVPEMRIVDREELFHLEPGLNPEAKGALWIPTVGQIGPIPAVIAIVENAVANGVKIHLNTKVKGIKVQNGEVKGVETNNGFIEADVIINAAGLYADEISRMVGLDYFTIHPRKGEYWIFDDTVPGPRRVLFPTPTPISKGIVVTTEISGHLMIGPNAQDLPPEEKENLATTREGLEEVWEGAKKLWPNLPPRSKVIRTFAGLRPEPTGGDFIIKAEEEVFGFINVAGIRSPGLTSAPAIAYEVAEIIQRDLGIKLIEKEKWNPYRKDITRFSMLSPEEANRLIREN…
273		FALSE	PFDSM3638_04590	tRNA pseudouridine(38-40) synthase TruA	30.7541	8.33434	1	25.5 (M.score:25.5)	1	3.00752	0.162152	273	MRVALKIAYDGTKFHGFQRQPNVRTIEGEILRALKDAGIEFENFKSASRTDRGVSARGNVIALSTEDDRIKNPMVLNSRMSDVWIWGIAEVPEDFHPRFWANTKVYRYYLPSLGMNIKKMKECSLLFLGTHDFSAFSRVDGRDTIRSIDRIEIWEKCNVVVVEIEGKSFLWEMVRRIVSALVLCSQGVLAEERIVEMLNGKFEKSRKVPPAPPEGLLLWDIKYENVEFQIDNASLKKFQREIVERFKLHASLSALYEDLILNEQKI
274		FALSE	PFDSM3638_02620	cell division protein FtsZ	44.0531	5.65786	1	25.5 (M.score:25.5)	1	2.69608	2.2279	274	MLEKLLEQAGIKLDFDGEEEKKSEIVDEFSGYKINIAVVGVGGSGNNTISRLYDLGVQGADLIAMNTDAQHLAITKAHKKVLLGKHITQGKGSGGDPKVGYLAAEASAQEIAAAVDGYDLVFITAGMGNGTGTGAAPVVARIVKETARNNGRFQEPLVVSVVTFPFKTEGTVRIEKAKWGIQRLLEYSDTVIIIQNDKLLELVPKLPLQSAFRFADELIARMVKGIVETIKLNSIVNIDFADVYSIMKGGGPALIGIGESDSNNRAVDAVNNALTNKMLDVEFGSGEKALVHFTIGPDVSLEEINKAMEVVYEKLSEKSEIKWGAMVDPEMGKTVRAMVIMTGVRSPYILGNVNALTDSSSWVVPKDRRLIGDPRIEKMFPDFNGSRAGRKRPSVGDAI…
275		FALSE	PFDSM3638_05010	DUF515 domain-containing protein	52.558	6.15795	1	25.3 (M.score:25.3)	1	1.91898	11.8287	275	MAEDIEAKIRRLRELGKIAESKEETPTPTPAKPPRRRFSRIGTLREKERRKRVIIGAVVLSVIIIAGVFAIYMYFENKAVRELENAKNAKIAEVNACFKGELANDTVKFQLINKIMAAKSIEELEKINVNQICEQRKKELEEERIRAEQERLAKELAQLKNDTKESIKAAFGPLLQVEVPDEIKKKIVSTLNDLLSKVDSAKTKDEVLSINVEDYLLPLWKEVYIYKIDSMPTSKVILKKGEEKRMYTKEEAKLIINRIGSLSELLEYNVEKVELVQVALVLSRENVVGGFIAPGDEVKVYAKNGTTFREIVPEGYVVTALLSTDAGRITVSESQQQTTTASSTSSTSSQQISSTSYSPGDVTYQNSQQSQTQSSVTQTTSESLSSTYTYSVNLGEILK…
276		FALSE	PFDSM3638_01690	aldehyde ferredoxin oxidoreductase	66.589	5.67324	1	25.3 (M.score:25.3)	1	1.15702	18.7749	276	MYGNWGRFIRVNLSTGDIKVEEYDEELAKKWLGSRGLAIYLLLKEMDPTVDPLSPENKLIIAAGPLTGTSAPTGGRYNVVTKSPLTGFITMANSGGYFGAELKFAGYDAIVVEGKAEKPVYIYIKDEHIEIRDASHIWGKKVSETEATIRKEVGSEKVKIASIGPAGENLVKFAAIMNDGHRAAGRGGVGAVMGSKNLKAIAVEGSKTVPIADKQKFMLVVREKVNKLRNDPVAGGGLPKYGTAVLVNIINENGLYPVKNFQTGVYPYAYEQSGEAMAAKYLVRNKPCYACPIGCGRVNRLPTVGETEGPEYESVWALGANLGINDLASIIEANHMCDELGLDTISTGGTLATAMELYEKGHIKDEELGDAPPFRWGNTEVLHYYIEKIAKREGFGDKL…
277		FALSE	PFDSM3638_07595	class III signal peptide-containing protein	21.6261	6.83439	1	25.1 (M.score:25.1)	1	7.25389	2.97915	277	MKKGQVSLEFLFIFMIFTLILIYSIRMTTFESGPSVEVARTQISLEEKALADAISNTISQVYAHGPGSKSTTYVHLTYLRWKTQIERVYGINNPSIFITYKNGTCVTIKGVSWIEEGGNKTVFCSESLLKVDWSNNGTIYNPSTTHAGNQGLEIPVEKLKKTLKIVVEWNPDKSPEWSYNEAEGTLYINIGIG
278		FALSE	PFDSM3638_04460	cytochrome-c3 hydrogenase subunit gamma	33.032	8.95011	1	25.0 (M.score:25.0)	1	3.76712	2.17873	278	MMLPKEIMMPNDNPYALHRVKVLKVYSLTETEKLFLFRFEDPELAEKWTFKPGQFVQLTIPGVGEVPISICSSPMRKGFFELCIRKAGRVTTVVHRLKPGDTVLVRGPYGNGFPVDEWEGMDLLLIAAGLGTAPLRSVFLYAMDNRWKYGNITFINTARYGKDLLFYKELEAMKDLAEAENVKIIQSVTRDPNWPGLKGRPQQFIVEANTNPKNTAVAICGPPRMYKSVFEALINYGYRPENIFVTLERRMKCGIGKCGHCNVGTSTSWKYICKDGPVFTYFDIVSTPGLLD

## Sheet: SmAP1 Strep-tag treated 3
Table S2. Mass spectrometry output of replicate 3 of Strep-tagged SmAP1 co-purified proteins.
Row	User Flag	OK	Accession	Protein	MW [kDa]	pI	#Alt. Proteins	Scores	#Peptides	SC [%]	RMS90 [ppm]	Rank	Sequence
1		TRUE	PFDSM3638_03360	methylmalonyl-CoA decarboxylase subunit alpha	57.0757	6.21093	1	1610.3 (M.score:1610.3)	25	43.8697	0.721971	1	MSMEEKVKDLYERKKKIMQMGGEEAIKKQHDKGKLTARERIELLLDPGSFVEIGMFVKHRATEFGMDKRELPADGVITGYGTIDGRLVFVYAQDFTVMGGSLGEMHAMKIKRIMELALEAGAPVIGLNDSGGARIQEGVDSLKGYGEIFKMNTILSGVVPQITAIMGPCAGGAVYSPAIGDFILMVDNPSTFMFITGPQVVKAVTGVEVSPVQLGGAMVHAQKSGQAHLIGKSDEEVIMLIKKLLSYLPSNNMEKPPKIKPKDEPFRRTPELYDIVPDDPNKGYDVRQVIYAIVDRDENGNPDFLELQPYFAPNAVIGFGRINGQPVGIVANNPIHLAGVLDIDSSDKIARFVRFCDAFNIPIVTLVDVPGYLPGVDQESRGIIRHGAKVLYAYAEATV…
2		TRUE	PFDSM3638_09730	amylopullulanase	153.692	4.65351	1	1267.9 (M.score:1267.9)	29	22.4354	0.615151	2	MSRKLSLLLVFLIFGSMLGANNIVKAEEPKPLNVIIVWHQHQPYYYDPVQGIYTRPWVRLHAANNYWKMAHYLTEFPDIHVTIDLSGSLIAQLADYMNGAKDIYQIISEKIANGEPLTYDEKWFMLQAPGGFFDHTIPWNGEPVTDENGNPIRDFWDRYTELKDKMLAAKQKYANLPLEEQKVAVTNEFTEQDYIDLAVLFNLAWIDYNYIISTPELKALYDKVDEGGYTREDLKTVLYHQMWLLNNTFKEHEKINLLLGNGNVEVTVVPYAHPIGPILNDFGWSEDFDAHVKKAHELYKKYLGGGVATPRGGWAAESALNDKTLEILAENGWQWVMTDQMVLERMGIPYSIENYYRPWVAEFNGKKIYLFPRNHDLSDRVGFRYSGMNQYEAVEDFIN…
3		TRUE	PFDSM3638_07050	DNA-binding protein	79.36	4.75616	1	1253.8 (M.score:1253.8)	23	38.2979	0.699547	3	MKKGLLAILLVGVMVLGTFGSGCIGGGTQTQTQTPTETGSPTQTTTPSGVTQAILELGKVTVVDTGTAIVVVGPKGEKPSVSIPSGKKVITVTYVVDEQNTPSVKELMEQGQGFGAINPAFFRDTNVDALVIAARRETNPEVRTEIFKALYILGNYYVPEVILGQNRQLRVYWDWVKGRYYHPTLPERYDLLWEDPNAPVVDTGIGSYKNDPETYVIATIGWPESFDPAWTYETFGWEIWHEIGDTLVTYWKEETEQVTPDLAVAWAHNKEGTEWYFVIRGGVKAYDPWNDKTYPIDATDVVFTFWRVARLGHSVSWMVTEFMNVSASQALTEEEFNNYVKNNPLIAEYNGKTAEIKSLQDLLNFFGYNGETAGVFKLVLPHPYAAVLNIVADPFLSVV…
4		TRUE	PFDSM3638_09745	maltotriose-binding protein	48.2131	4.62275	1	1137.5 (M.score:1137.5)	19	40.0922	0.47915	4	MRRATYAFALLAILVLGVVASGCIGGGTTTPTQTSPATQPTTTQTPTQTETQAVECGSGKVVIWHAMQPNELEVFQSLAEEYMALCPEVEIVFEQKPNLEDALKAAIPTGQGPDLFIWAHDWIGKFAEAGLLEPIDEYVTEDLLNEFAPMAQDAMQYKGHYYALPFAAETVAIIYNKEMVSEPPKTFDEMKAIMEKYYDPANEKYGIAWPINAYFISAIAQAFGGYYFDDKTEQPGLDKPETIEGFKFFFTEIWPYMAPTGDYNTQQSIFLEGRAPMMVNGPWSINDVKKAGINFGVVPLPPIIKDGKEYWPRPYGGVKLIYFAAGIKNKDAAWKFAKWLTTSEESIKTLALELGYIPVLTKVLDDPEIKNDPVIYGFGQAVQHAYLMPKSPKMSAVWG…
5		TRUE	PFDSM3638_06330	hypothetical protein	34.7364	4.68587	1	996.2 (M.score:996.2)	14	42.8094	0.469517	5	MKPYLHRFMRDFIMGDTPEEVSELVLSTLNEFSIDLREILEINDYPIKITVIDTWEKVRGDRIIVLPYSELTDDGSLYFLKQDLEEAMDNPDLEKLKLLAWEMLVSKVSYLLYKNFEEIRSLNNRNDIAILASLLTTTTLLSLDDIKTIAATLEAKISVIKEDLESVDVLFSSIDVLRYDEQEAVYNEVRMKVIRAGAQFLDASIINWMFLQAITLAPLIDPKNEIKRLIKERVFSGDLSKKLDEVFSGIWAFYDLIKIVGKGRFELVELRDKILEYRQRLGLEFYPSTQDFFEKATVI
6		TRUE	PFDSM3638_00140	phosphoenolpyruvate synthase	90.4279	5.152	1	935.5 (M.score:935.5)	18	26.8054	0.97398	6	MAYRFIKWFEELSKNDVPLVGGKGANLGEMTNAGIPVPPGFCVTAEAYKYFVENVKVSKEDVKRILGEKVNKGTISEVLAQAPDEPRPLQDWIMDIISKTDVDDSKMLQENTEAIRTLIKSLDMPSEIAEEIKQAYKELSQRFGQEEVYVAVRSSATAEDLPEASFAGQQETYLDVLGADDVIDKVKRCWASLWTARATFYRAKQGFDHSKVYLSAVVQKMVNSEKSGVMFTANPVTNNRNEIMINASWGLGEAVVSGAVTPDEYIVEKGTWKIKEKVIAKKEVMVIRNPETGRGTVMVKVAEYLGPEWVEKQVLTDEQIIEVAKMGQKIEDHYGWPQDIEWAYDKDDGKLYIVQSRPITTLKEEATAEEAEEVEEAEVILKGLGASPGIGAGRVVVIF…
7		TRUE	PFDSM3638_07930	proteasome endopeptidase complex, archaeal,alpha subunit	28.9909	5.09432	1	885.9 (M.score:885.9)	15	52.3077	0.73198	7	MAFVPPQAGYDRAITVFSPDGRLFQVNYAREAVKRGATAVGVKCGEGVVLAVEKRITSRLIEPDSYEKIFQIDDHIAAASSGIIADARVLVNRARLEAQIYRLTYGEPAPVSVIVKKICDLKQMHTQYGGVRPFGAALLMAGINDRPELYETDPSGAYFAWKAVAIGSGRNTAMAIFEEKYRDDMNLEDAIKLALMALAKTMENPSADNIEVAVITVKDKKFRKLTRDEIEKYLSEVLKEVEEEEVKEKEEDYSELDSNY
8		TRUE	PFDSM3638_08700	translation initiation factor IF-2 subunitgamma	45.01	8.10609	1	776.9 (M.score:776.9)	17	44.2822	0.657483	8	MGEKRKTRQAEVNIGMVGHVDHGKTTLTKALTGVWTDTHSEELRRGITIKIGFADAEIRRCSNCGRYSTSPICPYCGHETEFIRRVSFIDSPGHEALMTTMLAGASLMDGAILVIAANEPCPRPQTREHLMALQIIGQKNIIIAQNKIELVDKEKALENYRQIKEFIKGTVAENAPIIPISALHGANIDVLVKAIEEFIPTPKRDSNKPPKMLVLRSFDVNKPGTPPEKLVGGVLGGSIVQGKLKVGDEIEIRPGVPYEEHGRIKYEPITTEIVSLQAGGQFVEEAYPGGLVGIGTKLDPYLTKGDLMAGNVVGKPGKLPPVWTDLRLEVHLLERVVGTEQELNVEPIKRKEVLLLNVGTARTMGLVTALGKDEIELKLQIPVCAEPGERVAISRQIGS…
9		TRUE	PFDSM3638_07765	small nuclear ribonucleoprotein	8.43766	6.06492	1	716.3 (M.score:716.3)	9	88.1579	1.20471	9	MAERPLDVIHKSLDKDVLVILKKGFEFRGKLIGYDIHLNVVLANAELLQDGEVVKKYGKIVIRGDNVLAISPTEEG
10		TRUE	PFDSM3638_00225	C/D box methylation guide ribonucleoproteincomplex aNOP56 subunit	46.7591	9.4204	1	638.8 (M.score:638.8)	13	35.3234	0.716448	10	MKAFISENVRGIYAFDENGNLIEKRYFTDKPEKVLDQLLKGEITKDLEELLNSLKEKGYDEFVFEHPELSRRAKELGFSATTEFPNIAGERLRSNPEEFLGENWFEEYYKVGVALTRMRIQEQSGARDKMVIQAIEALDDVDKVINLLVARLREWYSLHFPELDELLPKHPQYVAFVKTVGHRDNINEEVLRELGLSEEKIKKILEAKEKTMGAWMDQTDIEVVRQLAEEIDRLYQLRKKLEDYIDRAMDDVAPNLKALVGAKLAARLISLAGGLRELAMMPSSTIQVLGAEKALFRHLRTGAKPPKHGVIYQYPAINRSPWWQRGKIARALAGKLAIAARVDYFSGEYIAEELKKELEARIREIKEKYPKPPKRKREERKGKKPWKKDKKKKKKKEKP…
11		TRUE	PFDSM3638_09460	DNA-binding protein Alba	10.3786	8.00889	1	614.5 (M.score:614.5)	10	66.6667	1.14511	11	MAEEHVVYIGKKPVMNYVLAVITQFNEGAKEVSIKARGRAISRAVDVAEIVRNRFLKDTVDIKEIKIGTEELPTADGRTTNTSTIEIVLERKV
12		TRUE	PFDSM3638_07175	NADH dehydrogenase subunit	47.9033	6.58872	1	601.3 (M.score:601.3)	12	33.4895	0.542253	12	MKKVEYWVKIPFGPIHPGLEEPEKFIITLDGERIVNVDVKLGYNLRGVQWIGMRRNYVQIMYLAERMCGICSFSHNHTYVRAVEEMAGIEVPERAEYIRVIVGELERIHSHLLNLGVVGHDIGYDTVLHLTWLARERVMDVLEAVSGNRVNYSMVTIGGVRRDIGEKQKRLILDMIKYYREVLPQIEDVFLHDSTIEARLRDVAVVPKKLAIEMGAVGPTARGSGIKEDSRWSEQLGVYPDLGIKPVTPEDVTGEKARGDVYDRMAVRIGELWMSLDLLEHALDQMPEGKIKTFPKDNILVAKLKLLGDGEGIGRYEAPRGELVHYVRGQKGRDGPVRWKPREPTFPNLFTIAKALEGNELADLVVAIASIDPCLSCTDRVAIVKEGKKVVLTEKDLLK…
13		TRUE	PFDSM3638_09725	ABC transporter ATP-binding protein	41.308	6.9444	2	568.8 (M.score:568.8)	10	34.8649	0.75541	13	MAGVRLVGVWKQFGSFTAVKDLTLEVRDGEFLVLLGPSGCGKTTTLRMIAGLEEPTKGQIYIGDKLVADPEKGVFVPPKDRDIAMVFQSYALYPHMTVYENIAFPLKLRKVPKQEIDKRVREVAEMLGLTELLNRKPRELSGGQRQRVALGRAIVRRPQVFLMDEPLSNLDAKLRVKMRAELKKLQKQLGVTTIYVTHDQVEAMTMGDRIAVMNQGVLQQVGTPEEVYEKPANTFVAGFIGSPPMNFLDATITEDGFLDFGEFRLKLLPDQFEVLQDYVGKEVIFGIRPEDIYDALFAQVKIPGENMARGVVDIIENLGGEKIVHISIGGLIVTAKFPGESRVKEGDEIDIVFDMKKIHIFNKKTGKAIL
14		TRUE	PFDSM3638_09940	thermosome subunit	59.9438	4.89907	1	507.2 (M.score:507.2)	10	25.6831	1.01337	14	MAQLAGQPILILPEGTQRYVGRDAQRMNILAARIVAETIRTTLGPKGMDKMLVDSLGDIVITNDGATILDEMDIQHPAAKMMVEVAKTQDKEAGDGTTTAVVIAGELLRKAEELLDQNIHPSIIIKGYTLAAQKAQEILENIAKEVKPDDEEILLKAAMTSITGKAAEEEREYLAKLAVEAVKLVAEKEDGKYKVDIDNIKLEKKEGGSVRDTQLIRGVVIDKEVVHPGMPKRVEKAKIALINDALEVKETETDAEIRITSPEQLQAFLEQEERMLREMVEKIKEVGANVVFVQKGIDDLAQHYLAKYGIMAVRRVKKSDMEKLAKATGAKIVTNIRDLTPEDLGYAELVEERKVAGESMIFVEGCQNPKAVTILIRGGTEHVVDEVERALEDAIKVVK…
15		TRUE	PFDSM3638_07725	hypothetical protein	30.2766	8.68511	1	505.1 (M.score:505.1)	10	42.7509	0.60535	15	MATPIGFFTAAIILLFILIFLSSAIKIVKEYERAVIFRLGRVVGARGPGLFFIIPIFEKAVIVDLRTQVLDVPVQETITKDNVPVRVNAVVYFRVVDPVKAVTQVKNYIMATSQISQTTLRSVIGQAHLDELLSERDKLNMQLQRIIDEATDPWGIKVTAVEIKDVELPAGMQRAMAKQAEAERERRARILLAEAERQAAEKLREAARIISEHPMALQLRTLQTISDVASDKSNVIVLTLPMEMLKLFKTLSEAAEAYREKVEKEKEKE
16		TRUE	PFDSM3638_00220	fibrillin	25.7458	7.81556	1	481.6 (M.score:481.6)	9	50.2203	0.488524	16	MVEVKKHKFPGVYVVIDDDGSEKIATKNLVPGQRVYGERVIKWEGEEYRIWNPHRSKLGAAIVNGLKNFPIKPGKSVLYLGIASGTTASHVSDIVGWEGKIYGIEFSPRVLRELVPIVEERRNIIPILGDATKPEEYRALVTKVDVIFEDVAQPTQAKILIDNAKAYLKRGGYGMIAVKSRSIDVTKEPEQVFKEVERELSEYFEVIERLNLEPYEKDHALFVVRKP
17		TRUE	PFDSM3638_09075	30S ribosomal protein S5	26.5341	9.58308	1	481.5 (M.score:481.5)	10	42.3729	0.745575	17	MSQEWKEYAKRVLDEWEPKTKLGMMVKEGQITDIHEIFRRGYQIKEPEIIDVLLPEVNARENQEVLDIALTVRMTDSGRRVRFRVLAAVGNRDGYVGLGIGHGKEVGIAIRKAINYAKLNIIEIKRGCGSWECRCRRPHSVPFAVEGKEGSVRVRLIPGPRGLGLVIGDVGKKILRLAGVQDVWSQTFGETRTTVNFAKAVFNALYNTNRVAISPEMIERYGIVVGRAMPTTFTLE
18		TRUE	PFDSM3638_01310	FAD-dependent oxidoreductase	53.7309	7.17373	1	477.7 (M.score:477.7)	10	27.3292	0.76101	18	MEKFDVIIIGAGPAGLFAAYELVERSNMKVLIIDEGGDVDQRVCPMDQLGYCIGCKPCHIMSGVGGAGGLSDGTVNLRPDIGGDLTELTNDENYSWQLVWEVDQILLKHGAPRNLYKGDPDQIRYWERKAAQAGVKFIPIIQRHIGSDNTPRVIKSIKQYLESKGVKFLLWTKALEFNKGWVKVRRGKDVFTIEGKYIIVAPGRGGAEWFHEIAQKIGLKARHGPIDVGVRVEVPAIIMEPITSINHDPKFHIYTDTYDDFVRTFCTNPYGFVVEERYDGYVGVNGHSMRNKKSNNTNFAFLTRIELTEPVEDTTAYGRSIAQLATTIGGGRPILQRLGDLRRGRRSTWSRIRKSNVEPTLKHVTPGDIAMALPHRVVTNIIEGLEKLDKVIPGVASDH…
19		TRUE	PFDSM3638_08290	hypothetical protein	37.6996	4.40122	1	460.4 (M.score:460.4)	6	23.0088	0.423944	19	MSIIQDIIGRIVVLRGGQYSVEVDVVTDESFGRFAAPIDENPALYIAEARRAVSEVDEIIGPELIGFDAIDQELIDSYLWEIDGTDNFSHIGANTALAVSVAVAKAAANSRNISLYSYIGGTFTTELPVPVVTFGADENFEYHVIVRDLLEVTDIIDAVVRLLDFSLSLEELSKASEQVGLELGLEVSLGITMRKELETEKVLEIVEDYNIAYIKPIGTPELFLELIAGTHGVFIDGEYLYRKYNILDRKYYNALSIKPINLGTLTDLYNFVNDVKAEKITPILSESKYEPADETLPHLALGLRCPAMLIHMNSVEKINELNRIAEELGERGRIITFEE
20		TRUE	PFDSM3638_09690	DNA repair and recombination protein RadA	38.3754	6.1964	1	450.1 (M.score:450.1)	9	38.3954	0.589962	20	MAGEEVKEIDEFEELGFEPATEETPKKKKKEKIIRSIEDLPGVGPATAEKLREAGYDTLEAIAVASPIELKEVAGISEGTALKIIQAARKAANLGTFMRADEYLKKRATIGRISTGSKSLDKLLGGGIETQAITEVFGEFGSGKTQLAHTLAVMVQLPPEEGGLNGSVIWIDTENTFRPERIREIAQNRGLDPDEVLKHIYVARAFNSNHQMLLVQQAEDKIKELLNTDRPVKLLIVDSLTSHFRSEYIGRGALAERQQKLAKHLADLHRLANLYDIAVFVTNQVQARPDAFFGDPTRPIGGHILAHSATLRVYLRKGKGGKRIARLIDAPHLPEGEAVFSITEKGIED
21		TRUE	PFDSM3638_04855	pyruvate ferredoxin oxidoreductase	44.149	5.02853	1	415.5 (M.score:415.5)	8	23.7374	0.734902	21	MPIRKVMKANEAAAWAAKLAKPKVIAAFPITPSTLIPEKISEFVANGELDAEFIKVESEHSAISACVGAAAAGVRTFTATASQGLALMHEILFIAAGMRLPIVMAIGNRALSAPINIWNDWQDTISQRDTGWMQFYAENNQEALDLILIAYKVAEDERVLLPAMVGFDAFILTHTVEPVEIPDQEVVDEFLGEYEPKHAYIDPARPITQGSLAFPAHYMESRYTVWEAMERAKKVIDEAFAEFEKKFGRKYQKIEEYKTEDADIIFVTMGSLAGTLKEWIDKKREEGYKVGAAKITVYRPFPVEEIRELAKKAKVLAFLEKNITIGLYGAVFTDASAALINESEKPLMVDFIVGLGGRDVTFNQLDEALEIAEKALKEGKVENPINWIGLRWELVK
22		TRUE	PFDSM3638_08940	serine hydroxymethyltransferase	47.9564	5.85226	1	410.9 (M.score:410.9)	7	25.2927	0.786465	22	MTYKEYRDKVLNFIEEHEKWRSHTINLIASENITSPSVNRAVASGFMHKYAEGWPKQRYYQGCKYVDEVELIGVELFTKLFKSDYADLRPISGTNANQAVFFGLGQPGDKVIVLHTSHGGHISHMPFGAAGMRGLEVHTWPFDFESFNIDVDKAEKMIRELEPKIVMFGGSLFPFPHPVKELAPVAKEVGAFVVYDAAHVLGLIAGGEFQDPLREGADIMTASTHKTFPGPQGGVILYKKFADDETIAKLQWAIFPGVVSNHHLHHMAGKVITAAEMLEYGEAYAKQIVKNAKALAEALAEEGFKVIGEDQGYTKSHQVIVDVSDLHPAGGGWAAPLLEEAGIILNKNLLPWDPLEKVNEPSGLRIGVQEMTRVGMMEDEMREIAHFIKRVLIDKEDPK…
23		TRUE	PFDSM3638_00270	phosphoserine phosphatase	36.8382	9.3278	1	407.1 (M.score:407.1)	6	24.3333	0.967594	23	MQVKVDPEEIRRIKQELEELQREKRDIEFKLEELQKELNVWIQKRDEKNLEVRRLREKAREFKAKRDEINQKIKELKKNKEEINAKLDLLYQEALEYKTKRDEFKQLRRLKMPKEKIEERIEKLEWELQTNPNITPEREKQIVDQIQVLATELEIIQQVERFNNKLQEVRKKIEQLKKARRAISLEIQQLANQSQQFHEQMIKTYQKADEVKKEADEYHQKVLEIREKIREVRRELRELERKILEYDQKHKELLAYKLAARLLSKRDANFEKAVQALEKFKRGEKLTLDEILLLQRYNLV
24		TRUE	PFDSM3638_05645	type III-B CRISPR module RAMP protein Cmr4	32.6095	5.5942	1	407.0 (M.score:407.0)	9	36.2712	0.641002	24	MKAYLVGLYTLTPTHPGSGTELGVVDQPIQRERHTGFPVIWGQSLKGVLRSYLKLVEKVDEEKINKIFGPPTEKAHEQAGLISVGDAKILFFPVRSLKGVYAYVTSPLVLNRFKRDLELAGVKNFQTEIPELTDTAIASEEITVDNKVILEEFAILIQKDDKGILESVVKAIEQAFGNEMAEKIKGRIAIIPDDVFRDLVELSTEIVARIRINAETGTVETGGLWYEEYIPSDTLFYSLILVTPRAKDNDMALIKEVLGKINGKYLQIGGNETVGKGFVKVTLKEVTNNGGTHAK
25		TRUE	PFDSM3638_06320	5-methyltetrahydropteroyltriglutamate--homocysteine methyltransferase	35.451	5.20947	1	385.1 (M.score:385.1)	7	27.5081	0.491591	25	MIVPALIGSLPRPIGLAKKLEQYYIGRLDERKLEEAYREYTRRAFEKLRDAKIKVITDGLYRWDDIFNPFIRFIDGIEVNGLFKFYENNFFYRSPVVRGEIALKENPIPEWISIAQEIKEDVYPEATLKAVLPGPVTLAYHSINEYYKTLTDLAEAYAQVIGELIKELDVKIVELQEPSLAAEISEATKNIEDRVDKEVAKNIIEDLGRIKKLWVVTYFGTPQVLPEGVILNVDLIEGSVPEEYSGEIGLGIVDARTTKMERADRLRDKIRKYLAKFETIYVTPNTLLDFLPESVAWKKLRLLGRLGGE
26		TRUE	PFDSM3638_00520	ABC transporter substrate-binding protein	61.2235	5.59228	1	382.6 (M.score:382.6)	9	23.6599	1.08493	26	MKHKAVFLLVVLISGVLASGCIGGETKETQASKKVQLTGDFAKDVIKIGKVLEENGISEVKFSAWGSGDPNSVMRVYGIVDAAYKINKIWKENGISVKITVTVKYDQSFNDQYKEFLSKQPLGQAGDFFVNSYAFLSTLAEEGYILDITDYAQAYQSVINDFYPTLLDASKYNGRLYGLPQDTEARPFYVRKDVAQCVGLDVSQLPEKVKNGEFTWSDVYYWAKQAKEKGCAEWGLIHRKGSAHPDLIQFIFAFNGKLYDENTGKLVLDVPAVYKWLYVEWKFARDGLLPEDIMSWDWAKQIHPTIVEGKTLFDIGGTWYWTEWQTKQYYKGRSLTPEEVKEWFAYTLFPAGEKGAKPVTLSQPFIWMINSKAGQLNPKYEELKDVYQALAFLMIIKAS…
27		TRUE	PFDSM3638_08920	ABC transporter substrate-binding protein	37.9468	4.86585	1	377.6 (M.score:377.6)	7	31.5029	0.616559	27	MKRAIPVFLLIVLVWISGCIGGGTSTIPTTPSAPETTTITKTEKVVETVTQTVTVTQTMTPQKYPITIVDSLGREVKIEKEPERIVSLAPSITETLYFIGALDKVVGVTKFDDFPPDVKEGRTIIGGFSDPNIEVIASLNPDLIIGTSMHMQYLDKLQEIAPVIIVDPKNIDEIYEWIIKLGKVVNREEEAVGVVNYMKAIVEDVESKVSNASRPKVFYLLGYWDGYWTTGKGTFIDSLITMAGGENIFSDIEGWKKVSAEDIVARNPEVIIISYHAGVNPGDLCNTPLANTDAVKNGRVYVISDDNIISRPGPRIVLALQEIAYFIHPEAFNYAYQPKACAVASS
28		TRUE	PFDSM3638_04350	NDP-sugar synthase	47.1908	5.11814	1	362.7 (M.score:362.7)	10	29.2978	0.888938	28	MKAVILAGGFGTRLRPISSTRPKPMVPVLGKPNLQYILEALEKVSEIDEIILSVHYMRGEIREFIQERMVDYPKDIRFVNDPMPLETGGALKNVEDYVSDDFLVIYGDVFTNFDYSELIKAHKENDGLITVALTKVYDPERFGVVIVDEEGKIIDFEEKPRKPKTNLVDAGIYMVNKEVLKEIPKNKEVYFEREILPKFVSQGLVYGYRMPKEYYWIDLGTPEDLFYAHQIALDQLSRENGYMILGENVEIPEDVEVQGPVYIDNNAKIGHGVKIKAYTYIGPNTIIEDKAYIKRSILLGSDIIKERAELKDTILGEGVVVGKNVIIKENAVVGDYARINDNLVIYGAKILPWKKVEEYEAYIRIKLDPTKVRPELTPERCPLGLPECIYKKFKAIAGE…
29		TRUE	PFDSM3638_07545	30S ribosomal protein S19e	17.3515	9.69352	1	353.8 (M.score:353.8)	6	40	0.7138	29	MATVYDVPGDLLVERVAQRLKEIPEIKPPEWAPFVKTGRHKERLPEQEDWWYYRVASILRRVYLDGPVGIERLRTYYGGRKNRGHAPEKFYKAGGSIIRKALQQLEAAGFVEKVPGKGRVITPKGRSFLDKIATELKKELEEIIPELKKY
30		TRUE	PFDSM3638_00500	proteasome-activating nucleotidase	44.7769	6.02818	1	349.5 (M.score:349.5)	8	24.4949	1.377	30	MSEDEAQFHGNYDDYVTYLKRRIRQLELQVRMLEADKERLERELSRLRSEMSRLRQPPAFAGSVIEVLDDDRAIVQNYNGPRFVVRIAPWIDKSKLRPGTRVALDQRTMAIIEILPASKDPAVLGFEVVERPNVTYNDIGGLKKQLQELREAIELPLKHPELFEEVGIDPPKGVLLYGPPGCGKTLMAKAIAHEVNATFIRVVGSELVRKYIGEGARLVHELFELAKEKAPTIIFIDEIDAIGAKRLDETTGGEREVNRTLMQLLAEMDGFDPRGNVKVIAATNRPDILDPALLRPGRFDRLIEVPLPDFEGRLEILKVHTRRMKLRGVDLRLIAELTEGASGADLKAIATEAGMFAIRERRTYVTQEDFLKAIDKVLGNEKKIIQQIMSHEVIYG
31		TRUE	PFDSM3638_05725	proteasome assembly chaperone family protein	29.9675	4.87974	1	342.0 (M.score:342.0)	6	25.8427	0.629252	31	MKETTIVVYERPDIYDPIFIEGLPGIGLVGKLAAEHLIQELKAKKFAELYSPHFMHQVLIRKNSVVELMKNEFYYWKSPDDEHRDLIIVTGDTQVPPTDSYGHFEVAGKMLDFVQEFGTREIITMGGYQVPEIQGEPRVLAAVTHEDLIEYYKSKLEGCSVEVIWREDEGGAIVGAAGLLLGIGKLRGMFGISLLGESLGYIVDAKAAKAVLSAVTKILGLEIDMTALDERAKETEEILRKVEEMQRAMMEQVTPKLPHEEEDRGYL
32		TRUE	PFDSM3638_08590	BMP family ABC transporter substrate-bindingprotein	44.1739	5.15414	1	337.1 (M.score:337.1)	8	24.6231	0.469562	32	MRKVGITLSVVALVIMGFVAGCIGGTQTQGEKVKVAVLFDVGGRGDLSFNDMAYLGAERAKKELGVEVEYMTPKSREDMVPLLKQLAESKEYDLLVLIGFLWTTPLDQVADQYPDQKFALIDSTTGKVRENEVDILFREQEAAALIGVIASGMAYELGGDTIGAVAGMDIPPLWKFHIGYLYGAKYFEKKTGKPVKLLWQYTGTFTDTQVGYTTGMQLLQQGAKVLYGLAGLTHVGMFDAVIDWNKQGKGKALAIGQDASQEWYAPEYIPISGAKRVDVAVYTAIEMVVKNQWKGGIMTLGLKEGGVGYWNLDGVRQFAEFAQEGGKLKDMTPEDVVRIVKEQREKYIKPEVWEIVRELEEKIKNGEIKFKTPQSHDEYEQIIKELEKGNLDAALEKE
33		TRUE	PFDSM3638_00630	rubrerythrin	37.3278	5.40183	1	332.8 (M.score:332.8)	8	34.3653	1.2212	33	MENDLKKLTKEIVGRLKNKSVKELLSYAIFNEEEEAKFYADLAEKVSRPSVKALFRRMSEESKVHELLLRKLFSKYFPGEEPVKVDVPPVEVVPFISKFESIEDYLEGLRYCMESELFAKRTYVLLSQVAENEGVRMVANELASIEQNHYEEIKAVYELVKTFRDREMLPESLKSGAYLITNESVGKYLILDLIDENKKLKLFVRENPEIFRRLIGENPNVEITWIAKVNAPNTISPTETHVLKKDIESFFEKVTKEGKKGVVFIQNVAYLVANLGFKETVDLLLHAKDLAVYYGGYLIITANPEVFEKTEWALLKLEFEVLF
34		TRUE	PFDSM3638_07005	S-layer protein	65.6784	4.37655	1	329.5 (M.score:329.5)	8	18.0165	0.645845	34	MKVKKIAALAVGAAVAGATLGFASAQGEVPEIPKDFFVKDGKPNVKIVVGSEGAAMDVVSAADIAAAIGSLLYTEKDVEVTDATVVARKDVTEPIEKIPVFDNYDTNTAHKYKVGDNLKDVPAWWNGSDFVANFSTSVWNDGVYDKAVEIRIDNIGSVGSYDLAANLTLKGIALDGITDSEVDVIDDFEDFTVNVSTVVANISLVVYNYTLKGQPTVDKITKDETIPEVNLITNLFLDNSTLAKFYPDYDGYTIEGVKVLKSGVGEGETLKILDNEYPIVFIGKDIQETACGDCFTYGKDWGEDYYNQGETYNFGDYKVTILDIDVARDKAFIKVESPSGDTETTTLAVGGTEAQTFFDGGIRIQIKDTFVGISGTNAVKLHVWTDLKTVKSGDEIMPG…
35		TRUE	PFDSM3638_08285	30S ribosomal protein S2	22.9924	9.298	1	304.4 (M.score:304.4)	6	36.6337	0.367733	35	MADEYLVPLDQYLAAGVHIGTQQKTKDMKKFIYRVRQDGLYVLDVRKTDERLKVAGKFLAKFEPQSILAVSVRLYGQKPVKKFGEVTGARAIPGRFLPGTMTNPAVKNFFEPDVLIVTDPRADHQAMREAVEIGIPIVALVDTENLLSYVDLAIPTNNKGRKALALIYWILAREILYNRGEIQSREDFKIPVEEFEMKIVRR
36		TRUE	PFDSM3638_06875	translation elongation factor EF-1 subunitalpha	47.6053	8.68736	1	299.5 (M.score:299.5)	8	27.8037	0.769448	36	MPKDKPHVNIVFIGHVDHGKSTTIGRLLYDTGNIPEQIIKKFEEMGEKGKSFKFAWVMDRLKEERERGITIDVAHTKFETPHRYITIIDAPGHRDFVKNMITGASQADAAVLVVAATDGVMPQTKEHAFLARTLGIKHIIVAINKMDMVNYNQKRFEEVKAQVEKLLKMLGYKDFPVIPISAWEGENVVKKSDKMPWYNGPTLIEALDQIPEPEKPVDKPLRIPIQDVYSIKGVGTVPVGRVETGKLRVGEVVIFEPASTIFHKPIQGEVKSIEMHHEPLEEALPGDNIGFNVRGVSKNDIKRGDVAGHTTNPPTVVRTKDTFKAQIIVLNHPTAITVGYSPVLHAHTAQVPVRFEQLLAKLDPKTGNIVEENPQFIKTGDAAIVILRPMKPVVLEPVK…
37		TRUE	PFDSM3638_05320	methyltransferase	45.23	5.9125	1	266.1 (M.score:266.1)	5	14.8338	0.838417	37	MVDLTLITEEAVKLAEEMIRKGYDIKKIKRALKLPEEEFNIALEVAKARIKAKDKFSRNDLWFDLEGLRYATHEMVADYRGKRLKEQGVKSVADVSCGVGIQLIFFAKHGIESIGVDIDPIKIEFAKRNADKYGVNIKFIVGDSLDPEIVEKINAEVIFSDPARPPEVPERNLEDLLPSPLKVYEAYKEKTESFIFDLPPQIRREKVPWKGEFEYIDLYGHVNRLTFYTEPLAKAERSAVLLPQGARLESNPDLENIVEEVDEPGRYIYEIPQGIDYADLINELFHTVRGELKLLLREKRRILATSDEEIKCKYFKRAYVVVKTMPFHPVRINDFLRKEGYGRATLRISVPEEEYWKIRRRIEANLSGEKRAFVFNVKGLAVIAEEVHQDQ
38		TRUE	PFDSM3638_05240	hypothetical protein	45.8191	5.57626	1	256.7 (M.score:256.7)	6	18.2266	0.982371	38	MSIVTSIQALDRILGGGIKENCNIALVGSIDNDYVLLMHQIVNSILSQGKKVLLVEFREDPNSLLEWLKDYGIDYAQYMERKQLRILDGFTNVYSQTQVSKPDILPNPLDLSITSAIIRDAVSKEKYDFVVLDDITTLYPLQPDPRGYIRVTIRLVNSLKSRGASVIGGINKDVLPIQDLTMILIPFEYVVEVMNGIIRVKRSYSPLTTPIEGINYVKSKKGIVDVESAFNNVYQMRDSITLKEDGSLMLGNLRVQIIDEFSEASLIKFVYMYLGPEKGKEFLYKWGKFESKELKLPKSSKEKARQILEDMFTTTKITGGGILNFVSFEDDIIVIEGKNLFPRLKNFPYPAHVNYAGSIAGIVEKLLGGEWKGDEISCESQGHEKCLFVIRKVSDSKSS…
39		TRUE	PFDSM3638_01370	pyrolysin	154.378	4.45794	1	255.6 (M.score:255.6)	6	5.00715	0.811009	39	MNKKGLTVLFIAIMLLSVVPVHFVSAGTPPVSSENSTTSILPNQQVVTKEVSQAALNAIMKGQPNMVLIIKTKEGKLEEAKTELEKLGAEILDENRVLNMLLVKIKPEKVKELNYISSLEKAWLNREVKLSPPIVEKDVKTKEPSLEPKMYNSTWVINALQFIQEFGYDGSGVVVAVLDTGVDPNHPFLSITPDGRRKIIEWKDFTDEGFVDTSFSFSKVVNGTLIINTTFQVASGLTLNESTGLMEYVVKTVYVSNVTIGNITSANGIYHFGLLPERYFDLNFDGDQEDFYPVLLVNSTGNGYDIAYVDTDLDYDFTDEVPLGQYNVTYDVAVFSYYYGPLNYVLAEIDPNGEYAVFGWDGHGHGTHVAGTVAGYDSNNDAWDWLSMYSGEWEVFSRL…
40		TRUE	PFDSM3638_05625	type I-B CRISPR-associated proteinCas7/Cst2/DevR	39.8459	6.12634	1	254.6 (M.score:254.6)	7	23.0769	1.21238	40	MKFAAGFVLIDAPHSALNMLGIDENLPDRNVTRVKTLRRGGNRYVYVSPQAWRYWWRTTLKEYFKWELSPLFREEKQVFTAANPIKYPDDDVFGYMRAYKKNNVNVTVTRVSPLKNTPLISVLPDRSSLTIDEGYASRHEGDPVPYSQEFYSTVLKGAFSLDLDLVGRFTTKNKAGYKNLLTRSDIPKKGKAGEIVKEIEELEKLAREIGVEIKEEEWIMPKEVRKKRAVETIKALRYLTGGAKQTQYHTDVTPKFFLGIIVNGGINPFISGIVREEKGEIILDAEALATRLEDFSEIIDSELFLGYDKGFVKELGLDIEALKSAVSIEVMEGKVGEVIESFAEEAGKYYL
41		TRUE	PFDSM3638_01200	30S ribosomal protein S24e	11.6722	7.84194	1	252.1 (M.score:252.1)	4	55.5556	0.514626	41	MEIRIKEIKENKLIGRKEIYFEIYHPGEPTPSRKDVKGKLVAMLDLNPETTVIQYIRSYFGSYISKGYAKAYDSKERMLYIEPEYILIRDGLIEKKEGE
42		TRUE	PFDSM3638_09115	30S ribosomal protein S4e	28.1282	9.88866	1	246.2 (M.score:246.2)	6	32.5103	0.219322	42	MARKGPKRHLKRLAAPTSWYIERKAYKWAVRPRPGPHNMRTSIPLLYIVRDYLGYAKTAREARKILNEGKFLVDGRVRKDYKFPVGIMDVVSIPETGEHYRVLPNRIGKLILHPISEDEAFIKPLRIRNKRMIKGARVQLNFHDGTNHIVSIAEKDNYFTSYTVLMKVPEREILEVLPFEKGAYVFVTQGKNVARKGRIVEIKRFPMGWPDVVTIEDEEGELFDTLKEYAFVVGTDKPKISLP
43		TRUE	PFDSM3638_07070	ABC transporter ATP-binding protein	37.6196	8.76212	1	242.8 (M.score:242.8)	5	17.3252	1.34168	43	MEYDRDVVLKVENLKKYFPVRGLIRTIGWVKAVDGVSFEIRRGETFGLVGESGCGKTTTGRTILRLIEPTDGKIIFMGKDVTKLKGEELKWFRRKAQIMFQDPYSSLNPRQTVFEIIMEPVKFHGIQVDDPEEFVIKLLESVGLNETHLYRYPHEFSGGQRQRIALARILALRPEFIVLDEPTSALDVSVQANILNMLKDLQKEYGFTYLFISHDLGVVKYMSNRIGVMYLGKLVEVGPADKLFENPLHPYTQMLFSAIPIPDPDIAREMKKKRMKVTGEPPSPINPPSGCRFHPRCPYFKAGVCDKKEPPMVEVEKDHYVACWLYAKA
44		TRUE	PFDSM3638_01020	enolase	46.8062	4.9826	1	240.3 (M.score:240.3)	6	21.6279	0.650444	44	MENPYEIVGVVAREILDSRGNPTVEVDVYTHVGMGRAAVPSGASTGTHEALELRDGGKRYHGKGVRRAVENVNKIIAPELIGMDVRWQREIDALLLELDGTENKSNVGANAILAVSLAVAKAAANSLELPLYQYLGGVNAYVLPVPLSNVINGGVHAGNDLDFQEFMIMPIGADSFREAIRWVSETYHVLKKVIMEKYGKNAVNVGDEGGFAPPMKEVTEPLDVLIKAIEEAGYKPGDEIALALDVASSELFNEETGKYVVGGKEYDRGELLELYKDLTSTYPIVSIEDPFHEEDWEGFVMITKELGHKVQIVGDDLFVTNPKRLRKGIELGAANALLLKVNQIGTLSEAMDAAFTAFRAGYGVIVSHRSGETEDATIADLAVALNAGQIKTGAPARSD…
45		TRUE	PFDSM3638_10365	30S ribosomal protein S3ae	22.9275	9.96835	1	236.9 (M.score:236.9)	6	22.7273	0.495901	45	MAAKRATTTRDKWKLKQWYIIYAPDFFGGVEVGLTPADDPEKVLNRVVEVTLKDVTGDFTKSHVKLYFQVYDVKGQNAYTKFKGMKLARSYIRSLVRRKTTRIDGIFNITTKDGYKLRVMAMAIAMRRIQTSQERAIRKIMQEIIYKKAEELNFKDFVLESVNGKIAAEIAKEAKKIYPLRKAEIRKIKVLEEPQVIA
46		TRUE	PFDSM3638_02395	translation initiation factor IF-2 subunit beta	16.2236	8.29835	1	234.5 (M.score:234.5)	5	32.8571	0.574702	46	MEIDYYDYEKLLEKAYQELPENVKHHKSRFEVPGALVTIEGNKTIIENFKDIADALNRDPQHLLKFLLREIATAGTLEGRRVVLQGRFTPYLIANKLKKYIKEYVICPVCGSPDTKIIKRDRFHFLKCEACGAETPIQHL
47		TRUE	PFDSM3638_09450	GlcNAc transferase	39.8084	5.44776	1	233.4 (M.score:233.4)	5	16.568	0.583814	47	MDKLKLYVAGFLALIIGIAGFIVWKWGFWMLIRIILSLGFLGLTLMLAFFLALTIYAESWKYALLLLPFTIISGYATYLSITWQKLKVIGGIILFFIAVLAFGIWYISEPDLSITDRFRSAEKLERMGKYKQAARKYEKAGNYLKAAEMYLKLGWLESAAWAYEKAGEYAKAAELYEQLYEKEKDTYYLKEAHEYWKKAGNMERAAKALERYAQEEPWFWEDVAKLYEELGNQEKAREAWMKALEYYKGEAQEEGVFWEDVGNIARKLGMEELAREAYQKFLEYCLKEAEEDPMWWKHVAEAYEYLGEKEKAEEARKKYEEYRQKIMKSNEETSNFPS
48		TRUE	PFDSM3638_02310	glyceraldehyde-3-phosphate:ferredoxinoxidoreductase	73.901	6.33504	1	222.6 (M.score:222.6)	6	12.8637	0.760379	48	MKFSVLKLDVGKREVEAQEIEREDIFGVVDYGIMRHNELRTYEVDPYDPRNIVIFGIGPFAGSVLPGSHRLVFFFRSPLYGGLFPSTMGGAGYQFKNVGVDFVEIHGKAEKPTVIILKNDGEKLSVDFYEIELEKLLDVWKEYKGEEGVYALTQYLLDNLASVFEGMEFRIAVVGPAALNTNMGAIFSQALRNGKRAVGSEDWAARGGPGSVLLRAHNVVAIAFGGKKRKREFPGEDISDVKVAKRVVEGIHKKAQRDVINESTVKYRYNPKLNTGGTFGGNYPAEGDLVPVLNWQMPYIPKEERIKIHELIMKYYWEPFNKESIQPKNWTTCGEPCPVVCKKHRKGHHVEYEPYEANGPLSGSIYLYASDISVHAVDAMGFDAIEFGGTAAWVLELVH…
49		TRUE	PFDSM3638_09095	50S ribosomal protein L6	20.8472	8.66717	1	222.1 (M.score:222.1)	4	26.6304	0.913929	49	MPVDAWIREEVEIPEGVEVTVEGYKVKVKGPKGELEREFFWPGIQIFTEDGNVVIYKDFPRRKDVAIARTFAAHIRNMIKGVTEGFTYKLKVVYSHFPISVKVQGDEVIIENFLGEKAPRKAKILPGVTVKVRGQEIIVEGIDKEAVGQTAANIEQATRITKWDRRIFQDGIYIVEKAGKPITF
50		TRUE	PFDSM3638_02475	transcriptional regulator	30.5873	5.55244	1	221.2 (M.score:221.2)	6	28.0303	0.890875	50	MSKDRMVELLQEHFELNLYEARAYVALVAFGVLTPAELASVSEVPAPRTYDVLRSLEKKGFAMTQPGKTNKYRPVHPANVLEKFIQDWQERVKEELEAKKKAKEELLELMAPLIETEVPKYGVERVWVVRGIKNSTLKTKEMLEEAQNEILLADDGFIAVNLEDDIIKAVDRGVKTKILLTKNLLPRLKASKIIDYAKEGKLELRALDKFDLPMLICDEEVFFALEDLAARYFNYETQVWIKDHRVVALFKEKFNEYWEKAEKV
51		TRUE	PFDSM3638_09060	preprotein translocase subunit SecY	52.2656	9.37917	1	220.7 (M.score:220.7)	6	12.6068	0.448612	51	MGARDIIYALERWFPEVERPKRRVPLRERFMWTGVALILYYVLAEIPVYGIPERIQDYFQFLRVVLAGRNGSILTLGIGPIVTAGIILQLLVGSEIIKLDLANPEDRRFYQALQRVFSVFMCFFEAAVWILGGAFGRVGVDVTYAIAVLMILQLAMGGIVLIILDELVSKWGIGSGISLFIAAGVSQTILTRSLNPLTDPNIIDPLTGQPAIVGAIPYFIQHILKGDLWGAIYRGGSAPDMLSVVATIVVFFIVVYFESMRVEIPLGYRGVTVRGSYPIRFLYVSNIPIILTFALYANIQLWARVLDRLGHPWLGRFDPTTGSPISGFVLYVIPPRNIFSVIDNPVRAIVYLILTVIFSLLFGYLWVELTGLDARSIARQLQRAGLQIPGFRRDPRTLE…
52		TRUE	PFDSM3638_05300	threonine synthase	43.0256	5.33903	1	217.4 (M.score:217.4)	5	19.0355	3.02551	52	MVLKCVVCGREYPEDEVRYRCECGGLLEVVIDLDKVDTSIFNGKEIKLWKYESWLPVKKRVSLEEGGTPLYRLLNLESDLGVKELYAKNEGANPTGSFKDRGMTVGVSKALELGMDKVICASTGNTSASLAAYAAKAGIKAYVLIPSGKIALGKLAQAIIYGARVVPIKGNFDDALRVVVETSKELGIYMLNSINPFRLEGQKTIAYEIYDQLGKVPDNVILPVGNAGNISAIWKGFKEMYEAGVIDELPRMIGIQAEGASPLAKAWKEKRKFQPEESPETIASAIRIGNPANWIKAWRAVEESGGLFESVSDEEILRAQKLLASREGLFVEPASAASLAGLIKLLESGEISRNESYVLITTGHGLKDPNIVIKNFQVPEPIDPTLEAFKEVIE
53		TRUE	PFDSM3638_09290	TATA box-binding protein	49.2393	6.00286	1	214.3 (M.score:214.3)	5	15.6463	1.05919	53	MPVIEEIPTVKFERVGMHSHIKGLGLDENGKAKFIGDGMVGQVKAREAAGIAVKLIKQGKLAGKGILLVGPTGSGKTAIAMGIARELGEDVPFVQISGSEIYSAEMKKTEFLKQALRRAIGVRISEERKVYEGKVEKIEIRRTRHPFNPYIEIPESVVLTLKTKDDSKTIRAGREIAYQILEMGIEEGDVIQIDAETGRVSRIGTTKEEEGLFFRKKVEMPTGPVLKIKEFTYTVTLHDLDVVNARAGGIFSLLFGGRMEINDEIRERVDQTVKQWVEEGKATLVPGVLFIDECHMLDIEAFSFLARAMESELAPILILATNRGMTKIRGTDIESPHGIPLDMLDRLLIINTEPYKKEEIREIVKIRAREEKIELSEEALEYLAELGEQTSLRYAVQLL…
54		TRUE	PFDSM3638_10040	50S ribosomal protein L10	37.1058	4.90975	1	212.7 (M.score:212.7)	6	22.7139	1.26374	54	MAHVAEWKKKEVEELANLIKSYPVVALVDVSSMPAYPLSQMRRLIRENNGLLRVSRNTLIELAIKKVAQELGKPELEKLINYIEGGAGILVTTMNPFKLYKFLQQNRQPAPAKPGAKVPKDVVIPAGPTSLAPGPIVGQMQAMGIPARIERGKVTIQKDTVVLKAGEEITPELANILNALGIQPLEVGLDLLAVYEDGIIYTPDVLAIDESEYINMLQKAYMHAFNLAVNIAYPTPQTIEAIIQKAFLNAKAVAVEAGYITKETISDIIGRAIRAMLLLAQQLPEDVLDEKTKELLSAQAQVSVAQVEEEKKEEKVEEEKEDEEASEEEALAGLSALFG
55		TRUE	PFDSM3638_09735	sugar transporter	45.1264	8.46209	1	210.3 (M.score:210.3)	5	14.4578	1.06953	55	MRRDELIKSGIMTFLAIVVMFLILFPVYYIFTVSIKPAATIATTELDLIPDKVTGEAYGEVLFGLKGTRISEEFTGTLEGSAKIVGGKLQVENGVIKGEVKYGPFTGIRFEVPVSGLSFELSQQVNEVQGNLKAEISGIISLTRVNSDGTIGLGVIKNVTLKSGEVNGLKISEGKLAGFIRIRDSGKAELTAIGKFVNSKFFHHLRNSLILATLTVFLTLLFVVPAAYAFSRLKFFGREHILYFYLMFTQVAGGLGIAGLIALYGMLVKLGLYNKLPALAIIYAAGSVPFNTWLLKSYIDSISPDFDEAALVDGASYLQIIRYVLLPMALPGIATVAVMSFIGGWTEFILASLLLTEENQPLSVWIYTLMGGIGRGIDWNYFAAAALLFALPVFIMFML…
56		TRUE	PFDSM3638_04080	50S ribosomal protein L14e	8.9581	10.3466	1	209.0 (M.score:209.0)	4	34.9398	0.761825	56	MPAIDVGRIAVVIAGRRAGQKVVVVDIIDKNFVLVTGAGLNKVKRRRMNIKHIEPLPQKIDIPRGASDEEVRAALEKAGISLA
57		TRUE	PFDSM3638_05530	homoserine dehydrogenase	34.9765	4.9576	1	208.6 (M.score:208.6)	4	19.375	1.32088	57	MKEVKISIFGFGTVGRALAEIVAENSEVYGIKLKVVSITDRSGTLWGDFDLLEAKEVKEATGKISNIGDYEVYYLKPEEIIEEIRPDIFVDVSSWDDAARVYEFALKEGVSVVTSNKPPIAESYDKLLKASQEGNAGLFFEATVMAGTPIIGLLRENLLGEKIEEIKAVVNASTTFILTRMEQGKTFEEAFNEAKSLGVLEEDPSKDIDGIDAFYKAKILHWVSYGAPPEFEERVGIREVKDARNVRLVAQVSEGRISVKPIKLPENSPLLVEGVQNAAIIKTDNLGEVVLKGPGGGGRVTASGVFTDIIKAALRFPKAR
58		TRUE	PFDSM3638_07065	ABC transporter ATP-binding protein	36.1372	6.8032	1	203.9 (M.score:203.9)	4	13.8037	0.883672	58	MPEPILQVRNLTVHFYTYAGIVKAIEKVSFDVYKGETFALVGETGCGKSVTSRALTQLIESPGRIVEGQVLYYRDDGSVVDLLKLSEEEIRKIRGNEIAYIFQDPHASLDPLYTVGHQIAEAMEVHGKISNIKEGIQKAIQILKSVLIPDPERRVKNYPHELSGGMKQRVVIGIGVSNNPRILIADEPTTALDVTVQAQILELLDKMKREYNATIILITHNLGVVAETADRVAVMYAGKIVEIGSVDQIFKNPLHPYTQGLLKAVPNPMTKIEKLEAIPGTVPNLINPPSGCRFHPRCPKAMEVCKQKVPELKEIEPGHFVACHLY
59		TRUE	PFDSM3638_02500	NTPase	20.8483	9.65539	1	202.9 (M.score:202.9)	5	30.4348	0.400215	59	MKKFRFFVSGMPGVGKTTLAKRIADEIKREGFKVGGIITQEIRSGARRSGFRVIALDTGEIGRLAYVGQGYPRLGRYVIDVESFEKVAIPAISRALREGDLIVIDEIGPMEFKSNEFLKALGLVLRSEKPLLATVHRRFVERYRPLGEYYWLTPENREAVFSEILVKIKELLRENENAGNKAQD
60		TRUE	PFDSM3638_09390	topoisomerase	33.1244	4.65992	1	200.0 (M.score:200.0)	5	23.5294	1.17101	60	MTIVDVRILVEGASDVEVVSKALQGLALGSEYNITISSIIPTTNVEIAKSAAAGADLLIIATDADRVGRELAERLFTELSEMVGHIERMKLPLGHDLEHVDVELVRKELRNALVRAGLKTLQRIPEYMELRRDYLDLKGKYEEIEKEKEDLLQKIEELKAKLEEIEEEYARVKEENLELRELLKKRAKVYKLEEKWKEMFPGIKMPSIDIFSRAIETLGFAGKIIVGQGHVYAEDDHILEQLFKTVYLSLQLTQSIEREEENIEVIEGEEEKLEEEVEVIENEGENIEE
61		TRUE	PFDSM3638_10380	30S ribosomal protein S15	18.5883	10.4093	1	199.6 (M.score:199.6)	5	19.6203	1.44809	61	MARMHARKRGKSGSKRPPRTAPPIWVEYTVEEIENLVVKLRKEGYSTAMIGTILRDQYGIPSVKLFKDPDNPNRNLTITRILEKHGLAPEIPEDLMFLIRRAVNLRKHLEQHPKDLHSMRGLQLIESKIRRLVKYYKRKGKLPKNWRYDPETAKLLVR
62		TRUE	PFDSM3638_08320	50S ribosomal protein L18e	13.7235	10.3493	1	197.4 (M.score:197.4)	3	30.8333	1.40977	62	MKRTGPTDPNLRRLIRYLRKKSNEYGVKIWKDVAWRLERPRRQRAEVNVSKINRYANDGEMIVVPGSVLGAGKLEKKVIVAAWKFSETARRKIIEAGGEAITIEELIERNPTGSGVRIME
63		TRUE	PFDSM3638_04880	pyruvate ferredoxin oxidoreductase	20.0089	5.42661	1	196.7 (M.score:196.7)	4	32.973	0.881187	63	MIEVRFHGRGGQGAVTAANILAEAAFLEGKYVQAFPFFGVERRGAPVTAFTRIDNKPIRIKTQIYEPDVVVVLDPSLLDAVDVTAGLKDEGIVIVNTEKSKEEVLEKLKKKPKKLAIVDATTIALEILGLPITNTAILGAVAKATGLVKIESIEEAIKDTFSGELGEKNARAAREAYEKTEVFEL
64		TRUE	PFDSM3638_00485	polyhydroxyalkanoate depolymerase	40.0286	8.34673	1	196.1 (M.score:196.1)	5	14.1243	0.953314	64	MEVNKASLTYDVPEDREYATKRILSLKRPSKIMVIGDVDTGKTTLIVYLANELISRGFKVAIVDADVGQKGILPPATISLALADMKFSSLSELKPLIHYFVGSITPSQFFGEMIVGTMRLSEIGKKFADYVLIDTTGMIYGSGVELKRLKIEAVKPDLILALEKKEELNPIVSGFEDKTIKLKVSENARSYSRSERRQIRQEKWRKYFENAKIVSFSLENVVVTGTSLFQGSDIREEEKSLLERLFKWVILHGRRIGDKYFVVKADVAEVPRVVDKNVVRYFDFEKLSNLLVGLLNEEGLCLGVGIIKGINFGEKRIDILTPVSEIENVREIRFGRIRVREDGEELGILDREAL
65		TRUE	PFDSM3638_07920	RNA-binding protein	29.5159	8.88667	1	195.9 (M.score:195.9)	6	33.7121	0.499509	65	MRRIFVQNRELVVPGTLLAQGPYKNGRGTFKEGSRIYSTVIGLVDIKGNTIRVIPLEGPYIPEVGDNVLGKIVDVKFSSWTVDIGSPYSATLKIQDYTDEKIDLLRTDLRKFFDIGDIIYAKVKGINEVNNIELTTKGMPFNGGPLRGGQIIKITSSKVPRVIGKGGSMINMIKKLTQSRIIVGQNGWIWISSKNPELEKLAIEAILKIERESHTRGLTDRIKNMLLSKLQELKERGVIEEIPSLEEETQEETVMENDVEARGP
66		TRUE	PFDSM3638_09080	50S ribosomal protein L18	23.1724	9.72781	1	194.9 (M.score:194.9)	4	31.0345	0.889559	66	MAHGPRYRVPFRRRREGKTNYRKRLKLLKSGKPRLVVRKSLNHHIAQIIVYDPKGDRTLVSAHTRELIRDFGWKGHCGNTPSAYLLGLLIGYKAKQAGIEEAILDIGLHPPVRGSSVFAVLKGAVDAGLNVPHSPEIFPDEYRIRGEHIAEYAKMLKEQDEEKFRRQFGGYLVKGLDPEKLPEHFEEVKARIIEKFEGEGARE
67		TRUE	PFDSM3638_00420	hypothetical protein	36.6828	4.4966	1	192.1 (M.score:192.1)	3	12.6582	0.549709	67	MTSEDIINALKAGNIEKAKELLTKEIDRLTDEELREVLEVAEEVAKEKRDLELYKLVVYYYAEFFGISKLHEFEEFARKFETKGLLHVADLYSLLGYPEKALEIYEGVLAEEKRPEIVGEVYYSIAAIYEELQEYEKAIEFIRKAIEEFKAANAKRKELQARVYEGYLLYESGDKVKAKEILAKLLAEVEDKELIAQIHLAFEEMFEDEENYEAAFHECLYAMINSKDSDFFEIAFDGLVDLIWQAIIDDSFEEIYNSMPMFKVAFPELSDFFEGVRLIALYKDGKAGREDVSAILDRIKDERLLSILEFLGEAEL
68		TRUE	PFDSM3638_07915	exosome complex exonuclease Rrp41	27.83	8.93505	1	188.6 (M.score:188.6)	4	21.6	0.953856	68	MMLKPEGLKLIDENGRRLDGRKKYELRPIKMKVGVLKNANGSAYIEWGKNKIIAAVYGPREIHPKHLQRPDRAILRVRYNMAPFSVEERKKPGPDRRSIEISKVIRGALEPALILEMFPRTAIDVFIEVLQADAGTRVAGITAASLALADAGIPMRDLVAACSAGKIEGEIVLDLNKEEDNYGEADVPVAIMPIKNDITLLQMDGYLTKEEFIEAVKLAIKGAKAVYQKQREALKEKYLKIAQEVEGSEQ
69		TRUE	PFDSM3638_03005	aspartate carbamoyltransferase	34.7025	6.12078	1	186.4 (M.score:186.4)	5	15.5844	9.98458	69	MDWKGRDVISIRDFSKEDIEIVLSTAERLEKELKEKGQLEYARGKILATLFFEPSTRTRLSFESAMHRLGGAVIGFAEASTSSVKKGESLADTIKTVEQYSDVIVIRHPKEGAARLAAEVAEIPVINAGDGSNQHPTQTLLDLYTIRKEFGKIDGLKIGLLGDLKYGRTVHSLAEALAYYDVELYLISPELLRMPRHIVEELREKGVTVYETSDLMSVIGELDVLYVTRIQKERFPDEQEYLKVRGSYQVNLQVLSKAKETLKVMHPLPRVDEIHPEVDKTKHAIYFKQVFNGIPVRMALLGLVLGVI
70		TRUE	PFDSM3638_02430	30S ribosomal protein S6e	13.9677	9.88268	1	184.0 (M.score:184.0)	3	35.2	0.418974	70	MATFKLVISDPKSGIAKQVEITGAETEKLIGKRIGDQIPAKELNINLNELFGKEFPEDVKLEIRGGTDKDGFPMRPDIHGPRRVRVLLSKGPGFRPKEKGERRKKTVRGNTISPEIVQVNVKLVY
71		TRUE	PFDSM3638_08335	30S ribosomal protein S11	14.7199	10.4117	1	182.5 (M.score:182.5)	3	28.4672	0.282915	71	MSEEQVNIKKKEKWGIAHIYSSFNNTIIHITDITGAETISRWSGGMVVKADRDEPSPYAAMLAARRAAEEALEKGIVGVHIRVRAPGGSKSKTPGPGAQAAIRALARAGLKIGRVEDVTPIPHDGTRPKGGRRGRRV
72		TRUE	PFDSM3638_03370	acetyl-CoA carboxylase biotin carboxyl carrierprotein subunit	15.305	4.58291	1	181.0 (M.score:181.0)	3	23.6111	1.15045	72	MKVKIVINGEEYEVEVEEIMPGKFKVTLEGETYEVEAKDLGISTPAPVPQVPTPTPAPAPAPMPTSTPASPQVGDNVVTAPMPGKILKILVSEGQRVTIGQGLLILEAMKMENEIPSPKDGVVKKIYVKEGDTVDTGQPLIELG
73		TRUE	PFDSM3638_05715	translation initiation factor IF-2 subunitalpha	31.8971	7.74154	1	178.1 (M.score:178.1)	4	17.4545	1.43063	73	MPRRAREYPEEGELVVATVKRVHNYGAFLDLDEYPGKEGFMHISEVASTWVKNIRDYLREGQKVVAKVIRVDPKKGHIDLSLRRVTQQQRKAKLQEFKRAQKAENLLKLAAEKLGKDFEEAWREVWVPLENEWGEVYAAFEDAARNGIEVLKGYVPDEWLPVLKEIIDSYVEVPTVTIDAEFEITVPKPNGIEIIKEALIKARDRANQEKDIEVKFTYLGAPRYRIDITAPDYYKAEEVLEDIAEEILRVIKEAGGEATLLRKEKRIRKVKKRKK
74		TRUE	PFDSM3638_04975	phenylalanine--tRNA ligase subunit alpha	57.7145	9.20347	1	177.3 (M.score:177.3)	4	8.41683	1.1944	74	MLGYNEKLVLLKLNEVKKARIEELVKLTGLEQVAIMRALLTLEKEGLAKISERKERIIRLTDLGRKYIQMGLPEIRALNVLKSKKKVKLDELRGVLTEDELKPIVGILRKEGWVKVEKTPEGLVLEITERGENPEERPIDKALKILSEKEYATSEEISKIVPINELKRRKVAQEEEVVERIAEITEKGVELVKKGIELKREVTSLTPELIASGKWREVEFKPFNIKAPVKKIYPGKKQPYRVFLDKIRRKLIEMGFIEITVDSLIETQFWNFDALFQPQNHPAREWTDTYQLKYPEKGYLPNRELVERVKEAHERGLAGSRGWGYVWSPERAMFLMPRAHATALSARQLAKGIEIPGKYFTIQRVFRPDVLDRTHLIEFNQIDGFVAAEDLTFRHLLGI…
75		TRUE	PFDSM3638_07910	RNA-binding protein	30.4881	4.66953	1	177.0 (M.score:177.0)	5	33.935	2.02836	75	MSNDEIVAGIMRDYILNLLKEKKRIDDRGFEDYRPIEVEVGVIEKAEGSALVKLGNTQVLVGIKATLGEPFPDTPNMGVMTTNVELVPLASPTFEPGPPDERAIELARVIDRGIRESRALNLEKMVIAPGKIVRVVFIDVHVLDHDGNLMDAIGIGAIAALLNARVPKVLYNEETGEVEILEEKEPLPVEKIPIPVTFAKIGNYLVVDPTLEEEQIMDGRLTITTDETGHISAVQKSEGGAFKLEEVMYAVETAFKKAEEIRKIILNALEKANNSEE
76		TRUE	PFDSM3638_00615	lysine--tRNA ligase	61.0154	5.80569	1	176.1 (M.score:176.1)	4	9.17782	1.87632	76	MVHWADYMAEKIIKERGEKEEYVVESGITPSGYVHVGNFRELFTAYIVGHALRDRGYNVRHIHMWDDYDRFRKVPKNVPQEWEEYLGMPVSEVPDPWGCHDSYAEHFMGLFEEEVAKLEMDVEFLRASELYKKGEYAEEIRKAFEAKGKIMAILNKYREVAKQPPLPENWWPAMVYCPEHRKESEIIDWDGEWGVKYRCPEGHEGWTDIRDGNVKLRWRVDWPMRWAHFGVDFEPAGKDHLAAGSSYDTGKEIIREVYGKEAPLTLMYEFVGIKGQKGKMSGSKGNVILLSDLYEVLEPGLVRFIYAKHRPNKEIRIDLGLGLLNLYDEFDRVERIYFGIEKGKGDEEELKRTYELSVPKKPKRLVAQAPFRFLAVLVQLPHLSIEDIIFTLVKQGHVP…
77		TRUE	PFDSM3638_00740	proteasome endopeptidase complex, archaeal, betasubunit	21.6353	5.16407	1	175.3 (M.score:175.3)	2	15.8163	0.442461	77	MEKKTGTTTVGIKVKDGVVLAADTQASLDHMVETLNIKKIIPITDRIAITTAGSVGDVQMLARYLEAEARYYYFTWGRPMTTKAMANLLSNILNENRWFPYLVQIIIGGYVDEPTIANLDPFGGLIFDDYTATGSGTPFAIAVLEEGYREDLTIEEAKELAIRAVRAAGRRDVYTGSKKVQVVTITKDGMKEEFVV
78		TRUE	PFDSM3638_04470	sulfhydrogenase 1 subunit alpha	48.2852	5.67303	1	172.8 (M.score:172.8)	5	10.9813	1.11063	78	MKNLYLPITIDHIARVEGKGGVEIIIGDDGVKEVKLNIIEGPRFFEAITIGKKLEEALAIYPRICSFCSAAHKLTALEAAEKAVGFVPREEIQALREVLYIGDMIESHALHLYLLVLPDYRGYSSPLKMVNEYKREIEIALKLKNLGTWMMDILGSRAIHQENAVLGGFGKLPEKSVLEKMKAELREALPLAEYTFELFAKLEQYSEVEGPITHLAVKPRGDAYGIYGDYIKASDGEEFPSEKYRDYIKEFVVEHSFAKHSHYKGRPFMVGAISRVINNADLLYGKAKELYEANKDLLKGTNPFANNLAQALEIVYFIERAIDLLDEALAKWPIKPRDEVEIKDGFGVSTTEAPRGILVYALKVENGRVSYADIITPTAFNLAMMEEHVRMMAEKHYND…
79		TRUE	PFDSM3638_08160	intein-containing tRNA-splicing ligase RtcB	106.117	8.79769	1	170.8 (M.score:170.8)	4	5.52604	1.59454	79	MKVPGRVYADDVLIEKMRQDRTLEQAANVAMLPGIYKYSIVMPDGHQGYGFPIGGVAAFDIKEGVISPGGIGYDINCLAPGTKVLTEHGYWLKIEEMPEKFKLQRLRLYNIEEGHNDFSRVAFVAERNIEKDETAIRIVTETGTLIEGSEDHPVLTPQGYVYLKNIKEGDYVIVYPFEGVPYEEKKGIIIDESAFEGEDPQVIKFLKERNLLPLRWEDPKIGTLARILGFALGDGHLGEMGGRLVLAFYGREETLRELKKDLESLGIKANLYVREKNYRIKTESGEYSGKTVLAELRVSSRSFALLLEKLGMPRGEKTKKAYRIPVWIMEAPLWVKRNFLAGFFGADGSIVEFKGTTPLPIHLTQAKDVALEENLKEFLYDISRILEEFGVKTTIYKVN…
80		TRUE	PFDSM3638_06325	methionine synthase	39.2905	5.92222	1	170.7 (M.score:170.7)	5	22.1893	1.85289	80	MELPILPTSVIGSYPKPRWLLRMYKLRELGKIPEEDFKEAVRDASISVLREHERAGIDIPWDGEMGRSEMTEYFTSKIKGFKFYGPVRVWGNAYFNKAAAVDKLEYEEPLVLDEFLWVKENTTREIVKIPITGPYTIAEWSFNEYYPDKESFVMDLAEIINKELKVLEKHGAKFVQLDEPAMLNHPSEVPLAVDAINRAVKGIKMKVGLHVCYSNYNLLADYFDEIKVTQFALEFANRNFRDMDFLKKLSNKELGFGVVDVHNPRVESVEEIRQAIKKVFTYLEPEWVYINPDCGLKLLDRKIAYQKLVNMVQAVRGVRKELEKEGKTTIEFRTLKDI
81		TRUE	PFDSM3638_02235	glutamine synthetase	50.1514	5.20904	1	169.1 (M.score:169.1)	4	11.6173	1.54405	81	MNISVSMNKFDSKIKFVQLVFVDINGMPKGMEIPASRLEEAVTDGISFDGSSVPGFQGIEDSDLVFKADPDTYVEVPWDNVARVYGFIYKDNKPYGADPRGILKRALEELEKEGYKAYIGPEPEFYLFKKNGTWELEIPDVGGYFDILTLDKARDIRREIAEYMPSFGLIPEVLHHEVGKAQHEIDFRYDEALKTADNIVSFKYITKAVAEMHGLYATFMPKPLFGFPGNGMHLHISLWKDGENVFMGEEGLSEIALHFIGGILKHAKALTAVTNPTVNSYKRLVPSYEAPVYISWGYRNRSALIRVPAFWGKGARIEYRCPDPSANPYFAFAAVLKAGLDGIKHKIDPFAYVEENVYEMSEEKRKELGIETLPGSLGEALEELEKDKVVKEALGDAYK…
82		TRUE	PFDSM3638_08315	50S ribosomal protein L13	16.3022	10.5336	1	166.1 (M.score:166.1)	3	26.7606	0.586824	82	MRIINAEGLILGRLASKVAKMLLEGEEVVIVNAEKAVITGNRDVIFKKYKQRTELRTLTNPRRGPFYPKRSDEIVRRTIRGMLPWKTDRGRKAFKRLKVYVGIPKEFQGKELETIIEAHVSRLSRPKYVTVGEVAKFLGGKF
83		TRUE	PFDSM3638_08705	4-demethylwyosine synthase TYW1	39.2279	6.87295	1	165.4 (M.score:165.4)	5	14.7929	0.71806	83	MDIKPGKITVQANPNMPEEIANLFRKQHYELVGRHSGVKLCHWLKKSLTEGRFCYKQKFYGIHSHRCLQMTPVLAWCTHNCIFCWRPMETFLGTEVPEPWDDPAFIVEESIKAQRKLLVGYKGNPKVDKKKFEEAWEPKHAAISLSGEPMLYPYMGDLVEEFHKRGFTTFIVTNGTVPESLREMIKDDKLPTQLYVSLTAPDIETYNKVNIPMIPDGWEKILEFLELMRDIPTRTVVRLTLVKGENMHNPEGYARLIMKARPMFVEAKAYMFVGFSRNRLTINNMPSHEDIREFAEALVKYLPGYHIEDEYEPSRVVLIMRDDVDPSGTGLEGRFIKH
84		TRUE	PFDSM3638_09100	30S ribosomal protein S8	14.6529	9.61555	1	162.7 (M.score:162.7)	3	30	0.56974	84	MTLLDPLANALSHITNSERVGKREVYIKPASKLIGEVLRVMQKYGYIGEFEFIDDGRAGVYRVQLLGRINKAGAIKPRFPVKVSEFEKWEKRFLPAFEFGILIVSTSQGVMSHKEAIEKGIGGRLIAYVY
85		TRUE	PFDSM3638_07060	ABC transporter permease	43.0606	9.26115	1	162.6 (M.score:162.6)	4	10.4439	1.02588	85	MQEEYKKSILDKLADKFVYGLGKFISLFKKGWMEKNRSKLEEWRLMLYALNRSPPALIGLFLVMIFIFLGIFGPYLAPWKYNFMPTLYTSNYDQVYLVPPGSKAVLEYYNNAVITYPLGSDHYGRDLLSLILQGARTSFVISIIVIILGVPLGIILGLIAGYYGGKIDELIMRITDMFLSFPALILAIALSAVLPERLQEFISAHPILEKIVLAIFALDQREAGNLGRLLAVIVAMIIVWWPGYARITRGSTLAEREKLYIEAARAIGLPTRTILFKHILPNIIGPILVYITLDFGSVVLMEAGLSFLGLGATPPIADWGRIVYDGAQYFPRCWWLVFYPGLVVLLTALGWNLLGDGLRDILDPKTRRSIEFKVKKKEGEKSA
86		TRUE	PFDSM3638_04275	type 2 isopentenyl-diphosphate Delta-isomerase	41.1947	6.64266	1	162.4 (M.score:162.4)	4	10.4278	1.07728	86	MDEGTRTVLRKFEHIEHCLKRNVEAHATNGFEDVHFVHMSLPEIDKDEIDLSVKFLGRKFDYPIMITGMTGGTRKGEVAWKINRTLAQAAEELNIPLGVGSQRAMIEKPETWESYYVRDVAPNVFLVGNLGAPQFGRNAKRKYGVKEVLYAIEKIDADAIAIHMNPLQESVQPEGDTTFSGVLEALAEITSSIDYPVIAKETGAGVSKEVAIKLESIGVSAIDISGVGGTSWSGVEYYRAKDELGKRLALRFWDWGIKTAISLAEVRFSTNLPIIASGGMRDGITMAKALAMGASLVGIALPVLKPAAKGDVEGVIKVIKGYVEEIKNAMFLVGARNVEELRKVPIVFTGFVREWLEQRIDLQEFVKKRGKVKI
87		TRUE	PFDSM3638_04850	pyruvate ferredoxin oxidoreductase	36.2379	9.13233	1	159.0 (M.score:159.0)	3	11.4804	0.991266	87	MAVRKPPITTREYWAPGHAACAGCGCATALRLATKALSEAMEEKYGDPNAFAIAHATGCMEVVSAVFPYTAWKAPWIHVAFENAAAVASGIEAAWKKLGRKGKILAIGGDGGTADIGLQALSGMLERWHNVLYLMYDNEAYMNTGIQRSSSTPYGAWTTTSPPGKYSVGEDKPKKWVALIAAAHQIPYVATASIGNPLDFVRKIKKAGKIDGPAFVQVLCTCPTGWRSPLEKGVEIARLAIETGIWPLFEIENGDIWNIKIQPPGGGAKVYKEGNRVVRIEFKKPIEEYLKLQGRFKHLFKRPEAIEELRNQVKAMWKVLGVEAILPRPEE
88		TRUE	PFDSM3638_09180	50S ribosomal protein L3	41.3635	10.1266	1	158.7 (M.score:158.7)	4	14.2466	1.0165	88	MGKVHRPRRGSLGFSPRKRAKSIVPRIRSWPKETEVRMLGFAGYKAGMTHILMIDDEPGLTNGKEIFMPVTIIETPPLRVFGIRAYRMGYLGLETATEVIVPDFPLDNYPAKERKGKPKPKMTFYKLLERRIATLPKNYTQEMFEQKLGQLEDMIKEGEIVDVRAIVATQPWVIKLKKKPEVMEYAIGGTSVEEKFNYIKEKLGKELRVGEVLKEGELLDVIAVTKGKGTQGPVKRWGIKLRAHKDSKGRRKVGSIGPWHPARVMWTVPMAGQMGFHHRTELNKRLIAIGENGKLKLDENTEIEITPKGGFPHYGIVRSDFMMIAGSVPGAIKRIIRVRPAIRPPKKKPPVQRPQITYVSVESKQ
89		TRUE	PFDSM3638_08770	signal recognition particle protein	49.8481	9.42574	1	158.1 (M.score:158.1)	4	11.5124	0.775289	89	MVLDNLGKALANTLKKIARASSVDEALIKELVRDIQRALIQADVNVRLVLQLTREIQRRALEEKPPAGISKKEHIIKIVYEELTKFLGTEAKPIEIKEKPTILLMVGIQGSGKTTTVAKLARYFQKRGYKVGVVCSDTWRPGAYHQLRQLLDRYHIEVFGNPQEKDAIKLAKEGVDYFKSKGVDIIIVDTAGRHKEDKALIEEMKQISNVIHPHEVILVIDGTIGQQAYNQALAFKEATPIGSIIVTKLDGSAKGGGALSAVAATGAPIKFIGTGEKIDDIEPFDPPRFVSRLLGLGDIQGLLEKFKELEKEVEIKEEDIERFLRGKFTLKDMYAQLEAMRKMGPLKQILRMIPGLGYSLPDDVISIGEERLKKFKVIMDSMTEEELLNPEIINYSRIK…
90		TRUE	PFDSM3638_07370	radical SAM protein	45.238	8.82098	1	155.8 (M.score:155.8)	4	10.7143	1.05386	90	MRFSPIIGPSSYVSSLCHSILRGELFSTCSVGCIYCYARWYRGAHGKEKPLWESLKLIKMLGGIIREGLAITPIRVSTLSDPFQGEGKITLKFLKLALKEKVPVIINTKLIPREKHIKTIERLAEEGLVVVQVSLPTLEETKVLEPFSPSPGQRLELIERLSRAGVPTIVRVQPFVPGWIRDIHTFIEEIASAGARMIILEFLRIEKELLPLFSKLFPGEDIYKREWESYLPGTSTEEAPLLHPPLDYRLSIAREFSIKAEKEGLAFSTCKEGLFEFHTPLNVDCCGMAFFDVEYISRRPTLWDLYLEIVENGKAKGEDLWERCRREELLCRENLTPYPRWFRRGFIAHEKRLESVLRKPHIVERITPSIKYENGYFIKRKERSNSGYNSFF
91		TRUE	PFDSM3638_07880	DNA-directed RNA polymerase subunit B	126.924	6.28367	1	152.7 (M.score:152.7)	3	3.13339	0.809179	91	MRGPTVVDVTPDDLWIVMESYWQEKGLVRQHLDSYNAFIERGLQEVVNEFGGIKPDIPDFEVKFGKIRVGEPEFQEPHGQRKPLYPMDARIRNLTYAAPLYLEMIPVIKGVEQDPVEVRIGELPIMLKSKVCRLYGLSDEELIKLGEDPKDPGGYFIINGSERVIVSIEDIAPNRTLVEKDERQEKYIAKVFSYRHGYRALVAVERRKDGILYVDIPNVPKPVKFVYVMRALGLERDKDIVEAVGNDPEVQQIMFDNLEDASDITTQQEALEFIGKLVAPGQAREYRLKRAEYVIDNNLLPHMGVSPEDRIKKAYYLGMMALKVIELSLGRRPEDDKDHYANKRLRLAGDLLKDLFRVAFSQLVKDIQYQMTKTYQRKGDKYTFGNIHRFIRNSIRPDV…
92		TRUE	PFDSM3638_09625	hypothetical protein	18.2176	5.26191	1	149.3 (M.score:149.3)	3	21.9355	1.51404	92	MKGRLQAHNIRIRTFIHATEDPEKVLEALETLFPEDISPKDVEFEIIETEGYFGNPILVLDAELKHSRNIRKFLENLRNLLSEEDKKYLLEHIEEKVDETGTFYIRFDKQKAYLGEVKVSEGEDVIHLRIKVKAFPMRKESVVEAVKKWLEGEME
93		TRUE	PFDSM3638_00635	indolepyruvate oxidoreductase subunit B	21.9736	8.36916	1	147.1 (M.score:147.1)	4	22.1106	0.870281	93	MEFNIIIAGVGGQGGLTLSRIIGSAAMVEGYRVRIGETLGMSQRYGSVLSYLRFGDSVYSPLIEEGKANLMLALEPVEALRNAAFLGKGSYAIVNAYPIHTATTLVGKEKYPSLEEIKEALEKICRVEMMNFQKEADLINPRTTGVLMLGYAQGKGLLPLKKESIIEGIRLTLREKLWEINFKAFERGRELAKHVCCDV
94		TRUE	PFDSM3638_06255	Na+dependent transporter	57.3993	5.81156	1	145.8 (M.score:145.8)	2	6.53846	0.114086	94	MEQRDRWATKIGLILAMAGNAIGLGNFVRFPTQVAGNGGGAFMVPYFLALFFLGIPVMWVEWVQGRYGGKYGHGTLGPTFYLMARETLKPRGALFFGLIGGALAFATTTLLNSYYLHLIGWSAAYSWFSISGAYFNVENTAEFFASYLSNHGLVFLFWGITVVLLAIAVGQGVSKGIERWVKVMMPLLYIFAIILVIYVFALGSPLGDPNWSTIKGFEFIWSPNWGYLKDHLWEVMLAASGQIFFTLSLGMGIIQNYASYLGPKDDVALSGLATVSLNEFAEVVLGGSIAVPLAVAYAPKIVPEDVLAQGSNAALAWISENFGLGFSYTSLPNIFVQMGTAGRFFGALWFLLLWFAGFTSAIAMYNYLTALLEEDLGISRKTGTWIVFVIYFLLGIPVV…
95		TRUE	PFDSM3638_09210	histone	7.40111	9.04784	2	145.1 (M.score:145.1)	2	37.3134	0.783813	95	MGELPIAPVDRLIRKAGAERVSEQAAKVLAEYLEEYAIEVAKKAVEFARHAGRKTVKVEDIKLAIKS
96		TRUE	PFDSM3638_09900	tetratricopeptide repeat protein	39.2778	4.47941	1	144.6 (M.score:144.6)	4	16.7665	1.44112	96	MVEEKIKEAIKNRDCETILELLDEYLEQIEDEEKLREALKEIGEAAVECEDFDIIHEISHLYEHLGEPEKGIELYKKIVERRKGDKEKYAEALYYLAEEYEHMGMPEEALKIYQELLEIEKELGNEREIALTLANIAVVKDELGEADEAIKLMSEAKDIFEKINDTKNYHIALIDLAHFYYELGEYEKAMQIIEEVLRNPLDDEIEVHGRLVESEIHSALENYKKAALSLRNALLRSGDDEYLFETAFEAVLEFIEELYNEEKYAELKEVASLFAELFEDDTKFFFQAIEKLAEWKLGKEEAKKEFEELYNKIENEEMKEFLDELKKPKVNLSL
97		TRUE	PFDSM3638_05635	type III-B CRISPR module RAMP protein Cmr6	38.7177	8.92255	1	142.6 (M.score:142.6)	4	15	0.980106	97	MKEVVKLVLLGERQNSLNLSLYFNKYPPTIIYPEVLEDRNKKLASPSGSQRKISLLVLNQGVLQFNKIKETIEKSLPIETKVKLPQKAYELYKKYYQDYTDMLNSLHAITGKFKTQSRLVVGLGDESVYETSIRLLRNYGVPYIPGSAIKGVTRHLTYYVLAEFINEGNDFYKRAKTVQDAFMKGDPKEILSNAKVPERCSRLCKEFLRIFGEKKVPEIIDELIRIFGTQKKEGEVVFFDAIPIAEEIADKPILELDIMNPHYGPYYQSGEKNVPPPGDWYDPIPIFFLTVPKDVPFLVAVGGRDRELTEKAFSLVKLALRDLGVGAKTSLGYGRLVEYV
98		TRUE	PFDSM3638_00545	transcriptional regulator	39.4021	7.11541	1	142.1 (M.score:142.1)	4	15.5425	0.905869	98	MLEEEILQKLQKFGLTKYESLAYLTLLKLGPSKATDVTKESGIPHTRIYDVLSSLARKGFVDIVHGTPRLYAPVNPEIVLEKIREDLISDIERLKKAFQELYREVHGEELPEIWTVHGFENTIDRAQHIIRSAKHDILINTPYEFLEYLRGVLEKRNDVLIIVISNFSEIPLWLRNKNNVILARSGQAPWLLGTWVIGDINYALFFGTLPEDKGKERFYSFWVKSTRLIQNYVHWFYTMYFDNSEIVKPLNYERMEKPLTLSHIRTVITVLKQAGLPRNIEVIGRSLADKKQVTIKGKVIDYEYTPLTANITVKTDNKKIKVGGLGSYLEDIEGESFILLD
99		TRUE	PFDSM3638_08740	hypothetical protein	51.0377	5.69962	1	136.4 (M.score:136.4)	3	7.9646	1.6812	99	MKRKKTVIHQLISEKQRFEKAKEGGNMAAKDDFGTTKYIIHAEFEANGVVERPDVVGAIFGQTEGLLGDDLDLRELQKTGRIGRIKVEVHTKAGKTYGTILVPSSLDRVETAIIAAALETIDRVGPCEAKIRVIKIEDVRATKRKYIIERAKEILETLMEEEIPETQELVEEVRKAVREMELIEYGPEKLPAGPHVPFSDSIIVVEGRADVLNLLRHGIKNAIAVEGTSIPETIIKLSKERIVTAFTDGDRGGELILKELLQVADIDYVARAPEGKEVEELTKKEIIKALRSKVPAEQVINELFNKGKSFYEIVKEREKEEEDERARKQEYTEEKESLKPQPQVQPNEKIVKPLKVLKPDYKEFEEFIEKVKNDSIALLIDENKNIIKEVPIRDMLSAI…
100		TRUE	PFDSM3638_07160	hydrogenase	13.0349	6.71807	1	135.9 (M.score:135.9)	2	21.7391	0.533349	100	MFGYWDPLYFIIVFIIGLILAYLLNLWAKKSGMGTREVGEGTKIFISGEDPEKVIPGFEHLEGYYTGRNTMWGLVNGVKKFFATLKNDHTGLLPDYVSYLLMTTAFILVILLLRG
101		TRUE	PFDSM3638_09070	50S ribosomal protein L30	17.6987	10.2477	1	129.8 (M.score:129.8)	3	19.3548	0.386108	101	MAKLAVIRIRGRVNVKRPVRDTLAMLRLHRVNHCVIVDDTPSYLGMLQKAKDYITWGEINAETLAKLIRKRGRLIGNKPVTDEYVKEKLGMTIEEFAQKVVNGEMSLKDLPNLKPVFRLHPPRGGFRGSKKRSFKEGGALGYRGEKINELIERML
102		TRUE	PFDSM3638_05690	protease	31.7821	7.08176	1	129.8 (M.score:129.8)	3	14.8789	1.3513	102	MGIGLWVRTGLLMAFLTGLLVGIGYLIGGQGGMIIAFTIALFMNFFSYWFSDSIVLSWYNARIVSEEEAPELHRIVEKLAMQAGIPKPRVAIVPTLVPNAFATGRSPEHAVVAVTEGLLRILNRDELEGVIAHEISHIKNRDTLIQTIAAVLAGAIMVLVNFARWSLWFGAYDEDRDGGNIVALILAIILAPIAATLIQLAISRSREYLADETGAKISGKPHALASALMKIEEAVRYRPLKNGNPATAHMFIVNPFRGVDFVELFSTHPPTEKRIERLRKIAMEMGIIF
103		TRUE	PFDSM3638_07855	30S ribosomal protein S12	16.4283	10.5509	1	124.9 (M.score:124.9)	2	14.966	0.740057	103	MPGKKAPNGEFAGRKLKLKRKKFRWSDIRYKRRVLRLKEKSDPLEGAPQARGIVLEKIAVEAKQPNSGMRKAVRVQLIKNGKVVTAFCPGDGAIKFIDEHDEVIIEGIGGPKGGSMGDIPGIRYKVVKVNRVSLKELVKGRKEKPRR
104		TRUE	PFDSM3638_01550	inosine-5-monophosphate dehydrogenase	44.2299	6.00521	1	122.7 (M.score:122.7)	3	10.7143	1.15678	104	MVGIQVQEVITDKYAKIDINAPLSEAIGIFEKEDPDLILVFDGNVYKGVLTQDLIIKSHLKWDPTKAKVRDVYKPAPVVKPTDDLSHAAKLMLETDLRSLPVGENKAEIIGVISDLALLERVVAEEFGKRKVEEFMTKDVITLTPDDTVAKALATMRDHGISRIPVVDEEGKLEGLVTLHDLIIRFIKPRFRAQAGELAGEKIPPFSMKLREAMIRGVITILPDATIREAVATMKDNNIDGLVVVDENNKVVGILTVKDLLLPISRMVEKEAKFYLQLGGDAAALSDFTRERIINDIKKFVDGYSDLLGNEGIIYLYIRRFNEKFRGVHLYQARMRVVTDRGVYVATGETWGAIQAVHDALRAIERQLLQKAELERDIRYAKRFIEKLELWR
105		TRUE	PFDSM3638_04890	acetyl-CoA acetyltransferase	40.9551	4.81896	1	122.5 (M.score:122.5)	3	8.76289	1.2972	105	MRKAIIVGVGMTPVGEHWRSSLRDLAVEAILNAMDDAGIDKVDSLYVGNMASGSFVEQENLGALIADWAGLGNIPAVKIEAACASGGAAVQEGAKAVLSGLEDVVLVVGVEKMTDAWPSDATRYLGYAADAEWELFHGASFVALNALIMRLYMNTYGYKEEDLALFAVNAHANGAKNPYAMFKKPITVETVMKSPYIADPLKLFDASPVCDGAAAVIITTPEKAKELGIPKDKWIEIAGMGRAIDTINLANREDFLTLKAATIAAERAYKMAGVKPEDVDFFEVHDAFTVMAALSLEALGVAKKGEGAKLAIEGQIAIDGDYPIQTMGGLKARGHPVGATGVYQVVEAVLQLRGEAPDGIQVPDAEVGLTQNIGGTGSNITVTVLRRV
106		TRUE	PFDSM3638_04945	DNA polymerase III sliding clamp	27.9875	4.54029	1	122.3 (M.score:122.3)	3	13.6546	0.644079	106	MPFEIVFEGAKEFAQLIDTASKLIDEAAFKVTEDGISMRAMDPSRVVLIDLNLPSSIFSKYEVVEPETIGVNMDHLKKILKRGKAKDTLILKKGEENFLEITIQGTATRTFRVPLIDVEEMEVDLPELPFTAKVVVLGEVLKDAVKDASLVSDSIKFIARENEFIMKAEGETQEVEIKLTLEDEGLLDIEVQEETKSAYGVSYLSDMVKGLGKADEVTIKFGNEMPMQMEYYIRDEGRLTFLLAPRVEE
107		TRUE	PFDSM3638_01045	Fe-S cluster assembly protein HesB	44.4138	6.07485	1	120.4 (M.score:120.4)	3	8.12808	1.162	107	MILQVALDLTDIEQAISIAEKAARGGAHWLEVGTPLIKKEGMRAVELMKRRFPDRKIVADLKTMDTGALEVEMAARHGADVVSILGVADDKTIKDALAVARKYGIKVMVDLIGVKDKVKRAKELEEMGVHYILVHTGIDEQAQGKSPLEDLEKVVKAVKIPVAVAGGLNLETIPKVIELGATIIVVGSAITKAKDPEEVTRKIIDLFWDEYMRTIKKAMKDITEHINEVADKLKLEEVRGLVDAMIGANKIFIYGAGRSGLVGKAFAMRLMHLDFNVYVVGETITPAFEEGDLLIAISGSGETKTIVDAAEIAKQQGGKVVAITSYRDSTLGKLADVVVEIPGRTKTDVPTDYIARQMLTQYKWTAPMGTLFEDSTMVFLDGVIALLMATFQKTEKDMK…
108		TRUE	PFDSM3638_05655	type III-B CRISPR module-associated proteinCmr3	36.2926	8.69408	1	120.0 (M.score:120.0)	3	13.0435	1.01682	108	MIEVTFTPYDVLLFRESRPFDAGSESVARSIIPLPQTVAGAIRTLLFYKGLKNCVGVGEEEPEFTLVGIAIGTEKGRIYPLPFNIIKSEKFYKVVNPGRFLGKLILPPKGKYKSGYVTESILEKYLKGELKEVEENKVIRIEKEKRIGIKLSREKKVVEEGMLYTVEFLRIEKIYAWIEDPGCGIKDILSSYEFLTLGGESRVAFVEVDDKTPDIFNRELGSTKKALFYFSTPTIGKVGEIVQELEKRLNAKIDDYLLVSSRPTAISGWDMHEKKPKGTKFAIPPGSVLFVEFKEEVEVPPYIKLGKLKKLGYGLALGGIWE
109		TRUE	PFDSM3638_08340	30S ribosomal protein S4	21.3246	9.98351	1	119.1 (M.score:119.1)	1	10	0.531761	109	MGDPKRQRKKYETPPHPWIKERLDRERVLMDKYELKNKKELWKHETQLKNFRRRARRLLAARGKQAEIEREQLLARLKRLGLLPEDAVLDDVLSLTIEDILERRLQTIVYKKGLARTMRQARQLIVHGHIEVNGQIIRSPSYLVLKEEEDTITYARTSPFANPQHPERMMIEKAKQGGEA
110		TRUE	PFDSM3638_09130	30S ribosomal protein S17	13.26	9.71082	1	118.3 (M.score:118.3)	3	30.9735	0.380875	110	MMRDIGLRVQPPAEKCDDPKCPWHGNLKIHGRVFEGIVVSDKPRKTVTVERQYYFYLNKYERYELRRSKIHAHNPPCINAKVGDKVLIAETRPLSKTKHFVVVAVLERAEERR
111		TRUE	PFDSM3638_07850	30S ribosomal protein S7	24.6371	9.96311	1	117.1 (M.score:117.1)	3	20.9302	1.07302	111	MAKPLNERFFIPHEIKVMGRWSTEDVEVRDPSLKPYINLEPRLLPHTHGRHAKKHFGKANVHIVERLINKIMRSGGSHYKVAGHFMRREHRSLNSKKVKAYEVVKEAFKIIEQRTGKNPIQVLVWAIENAAPREDTTSVMFGGIRYHVAVDISPMRRLDVALRNIALGASAKCYRNKMSFAEALAEEIILAANKDPKSYAYSKKLEIERIAESSR
112		TRUE	PFDSM3638_09110	50S ribosomal protein L5	21.2173	9.59184	1	116.3 (M.score:116.3)	2	15.0538	0.510507	112	MAVEIPNKEQILADWEAHPMRRPRIEKVTINIGVGESGERLTKAEIMLQQLTGQKPIRRKAKKTNRDFGIRRGEPIAVKVTLRGPKAYELLKRLLAAVDNRLKASSFDEHGNVCFGIEEHINIPGVEYDPEIGIFGMDVCVTLERPGFRVARRKRKRAKIPTRHKLTKEEGMVYMMEEFGVEIVEG
113		TRUE	PFDSM3638_09935	hypothetical protein	27.016	4.83947	1	116.2 (M.score:116.2)	2	10.8333	0.822084	113	MRKISLLVLVVVSSIIVAGCIGGGTSTAEVPKEELYAKLENATTLGVLWNLELLNSTTREVLATSKGKAVIYPNLVLSYRESEGENWISKSVITWENNEGSLILVMTINNTTQKYEDSKEFNVTIARKMAFPGGEIELLLLDNMEFNSTKVETKCDGECVLRIVKEDSKVLYDIQGVWKIEYIEGNVTFDSNTKEISKVEIVMETSQGFIEKIKYEFIKNNLDEAKAEIERIREELKNTS
114		TRUE	PFDSM3638_05360	30S ribosomal protein S8e	14.2531	11.519	1	115.8 (M.score:115.8)	2	23.622	0.314319	114	MAIWQGRSLKKPSGGRIVLARKKRKRELGREPSNTRVAEQDKRKIIRTYGGNRKVRLTAAAYANVFDKSGKGRKVRIIRVIENPANRQFARRNIITKGAIIETEIGKAKVTSRPGQDGVVNAILLEE
115		TRUE	PFDSM3638_08140	hypothetical protein	9.80618	4.72956	1	114.4 (M.score:114.4)	3	37.037	1.2173	115	MNPLWIIVLVSLVLNIVFIMLYVSARRNPYYIVYDEETKSQLKRRVLHLKEDLESELEEFDVTEWERQLEKSLEEEIKGLQ
116		TRUE	PFDSM3638_06405	hypothetical protein	6.76168	9.04838	1	113.3 (M.score:113.3)	2	42.3729	0.52391	116	MVELLVKSKVKEFVSSIDKDMRVSPEFYEALEAEVKALIEKAVKRAQAEGRKTLYARHV
117		TRUE	PFDSM3638_05650	TIGR01897 family CRISPR-associated protein	56.2316	5.82011	1	111.8 (M.score:111.8)	2	4.79167	0.56813	117	MGMRVLVTTWGNPFQWEPITYEYRGIKVKSRNTLPILVKTLEPERILILVADTMANYYDSGKNKPEIEEKSFSSYSEVVEDTKERILWHIKEEVIEELREEDPELAKKIENMLKDERITIEVLPGVGVFGNITVEGEMLDFYYYATYKLAEWLPVQNNLEVYLDLTHGINFMPTFTYRALRNLLGLLAYLYNVKFEIVNSEPYPLGVSQEIREDTILHIREIGEGVVRPRPQYSPVEGKLYWNAFISSVANGFPLVFASFYPNIRDVEDYLNKKLEEFLVGIEVGEREDGKPYVKREKALDRSFKNASKLYYALRVFNTKFQNYPKKEVPIEEIMEISKIFESLPRIGIILERQVEWLRNLVYGRLWYENGEQKIKKGLLEIIKDKKDKRKEAEALKKG…
118		TRUE	PFDSM3638_09500	daunorubicin resistance protein DrrA family ABCtransporter ATP-binding protein	36.3347	8.3744	1	109.7 (M.score:109.7)	3	11.0063	1.14717	118	MKVVEVKDLRKLYPKKIPLPFRKVEYFEALKGITFSVKKGELFGLLGPNGAGKTTTIKILTTLLEPTSGVAKVLGYDVVKEPREIRRRINLVAEGERTLYWRLSGYENLRYFASIYYVPRREAEKRIKELLEMVGLWERRNDLVMNYSRGMKQRLAIAKALINDPEVLFLDEPTLGLDVQSAVFVRELVRKLVDEEGKTVLLTTHYMQEAEELCDRIAIIDHGRIIALDTPEGLKKMVRDNTIVEVKVRNYPGSNPFGLAKVEEQEGVAILRGSIDEEEIPRLVEFLVKNNAKVLSVEVEEPTLEDVFIKLTGRGLRD
119		TRUE	PFDSM3638_06300	translation initiation factor IF-5A	15.4351	5.16695	1	108.1 (M.score:108.1)	3	27.5362	1.56709	119	MGDKTKVQVSKLKPGRYIIIDDEPCRIVNITVSSPGKHGSAKARIEAVGIFDGKVRSIVKPTSAEVDVPIIDKRTAQVIAVTPDTVQIMDMETYEMFEVPLDTGVEEEIKDKIKEGINVEYWETLGRIKIMRIKGEEE
120		TRUE	PFDSM3638_09145	50S ribosomal protein L29	8.52384	10.326	1	106.5 (M.score:106.5)	2	36.1111	0.692735	120	MKPSEIREMSIEEIDAKIRELRLQLAKERGLLTMGTSLENPMVIRNLRRDIARLLTIKKEKLREREKGKVKK
121		TRUE	PFDSM3638_00815	preprotein translocase subunit SecD	55.7784	8.93131	1	105.6 (M.score:105.6)	2	3.9604	0.963365	121	MKWRRILLNFRVIVLIFFLLISITALATRGLTFGLDISGGISITVKLEKPVDSQTMEQVKIALEQRLNTLGVKNIVVEPWGDQFVIVKVANVTEEEADQLIKTIERQGVFYAEFQGIIFATGKDILNVGSVSYDPQHSAWVVPFRLSKEAAEKFAQLALGKAGYPVDMFLDPPVNSTLVVSNRVYEAMLSKTFMLEGDMTLVERIEKAFGIKVVPYANVTPEEIAEIAKGSERIILLDVDGNLSKALKEMGFEVETRSMRSDEDVYDFIKRSLGLYGPYRVSEGLATGNPSTEVMISITAPKTDIQARQDAQVVSVVLRSGSLPVKLSIERIDYISPKLGENFKRQVLVAGIAALLVVGLIVFLHYRKIKIAIPVMFTSFSEVLIILGIAALIRWNLDL…
122		TRUE	PFDSM3638_09170	50S ribosomal protein L23	9.86955	9.69534	1	105.3 (M.score:105.3)	2	24.4186	0.300486	122	MDPYKVIIRPVVTEKAISLIEKENKLTFIVDRRATKQDIKRAVEEIFNVKVEKVNTLITPRGEKKAYVKLKPEYSASEVAARLGLF
123		TRUE	PFDSM3638_06825	30S ribosomal protein S28e	8.09545	9.95051	1	103.2 (M.score:103.2)	2	33.8028	0.525859	123	MAEDEGYPAEVIEIIGRTGTTGDVTQVKVRILEGRDKGRVIRRNVRGPVRIGDILILRETEREAREIKSRR
124		TRUE	PFDSM3638_10035	50S ribosomal protein L1	23.8372	9.78089	1	101.9 (M.score:101.9)	2	11.5741	0.843171	124	MPFDRQKIVKAVKEAKARAKPRNFTQSVEVAVNLKDIDLKRPENRFKLEVVLPHGRGKDVKIAVIADGAVAEAARKLGLDVISSAELEEIASSPRQARKLAKKYDFFIAEAPLMPKIGRYLGRYLGPRNKMPVVVPPTLTDLTPIVEKLKKTVRIQLKNNPVVHAPVGTEKMSDEEIAENIEAVLNAIIGKLERGESQVKSVYVKTTMGPAVKIEG
125		TRUE	PFDSM3638_10010	hypothetical protein	15.5083	5.51868	1	100.9 (M.score:100.9)	3	24.8175	0.339709	125	MAILGHNIIRVEFEKNPVPGGQVEVSLNPKIEELRLGEINLPNGKVKGIEVELTYNIIYSPEVGKGMIRMIVFYLPRNREDVDNILDNWEKEKKLPGELVAEVVNFANNLLIPFAMMITKEMGMPSPIPIPRVVVRQ
126		TRUE	PFDSM3638_00700	TIGR00266 family protein	23.4064	5.68563	1	100.8 (M.score:100.8)	2	12.3288	1.63757	126	MKYKIEHRPSFSLLEVELDAGESIQAEAGAMVYMDPTVEIVTKAKGGLLGALKRSILGGESFFVNIFKGPGKVGLAPGYPGDIIGLEVNGKLYAQSGAFIAASEDIDIDVKLGGIKTVIGREGLFLLELRGRGIAFLSSYGGIQKISLRGESLIVDTSHLVAFTEGIDFTIKTIGGLKSTLFGGEGFVFEFRGTGDVYIQTRSLDGFLSWLLPHLPSSR
127		TRUE	PFDSM3638_08975	RNA-guided pseudouridylation complexpseudouridine synthase subunit Cbf5	38.5366	7.87399	1	100.8 (M.score:100.8)	3	8.82353	1.18434	127	MARDEVRRILPADIKREVLIKDENAETNPDWGFPPEKRPIEMHIQFGVINLDKPPGPTSHEVVAWIKKILNLEKAGHGGTLDPKVSGVLPVALEKATRVVQALLPAGKEYVALMHLHGDVPEDKIIQVMKEFEGEIIQRPPLRSAVKRRLRTRKVYYIEVLEIEGRDVLFRVGVEAGTYIRSLIHHIGLALGVGAHMSELRRTRSGPFKEDETLITLHDLVDYYYFWKEDGIEEYFRKAIQPMEKAVEHLPKVWIKDSAVAAVTHGADLAVPGIAKLHAGIKRGDLVAIMTLKDELVALGKAMMTSQEMLEKTKGIAVDVEKVFMPRDWYPKLWEKRDRS
128		TRUE	PFDSM3638_01185	transcriptional regulator	16.9754	9.02306	1	100.7 (M.score:100.7)	3	24	1.01753	128	MAELLDRTDKMLLEELKKNARENIAALSKKLGIPRTTVHYRIKRLLEEGIIEKFTIKPNYKKLNLGTTAFVLIRYDPDSGLTQKEVAEQIAKIPGVYEVHIVAGEWDILLKVRAANAEEVGKIVIEKLREIKGVGQTVTMVSFVTIKEEI
129		TRUE	PFDSM3638_07170	hydrogenase	20.1713	5.04967	1	99.6 (M.score:99.6)	2	9.82659	1.03064	129	MSKAEMVANKIKERFPNAEVVVKTNKWGRERVWVRISREEYKELMKFIRELDPEAHYSIGIEQDWGDELGFLNHILLFYDEPPGVSLLIDVHAPKDNPVLPDTSDIFPISLQFEREGMEMVGLDFEGAPDKRRLFLPDDFPEGIYPLRTDEKGVPEEMVKNAGHPYLLRREKK
130		TRUE	PFDSM3638_08310	30S ribosomal protein S9	15.2792	10.3465	1	95.4 (M.score:95.4)	2	21.4815	0.859628	130	MRIIQTTGKRKTAIARAVIREGKGRVRINGKPVEIIEPEIARFTILEPLILAGEEIWNSVDIDVKVEGGGFMGQAEAARMAIARALVEWTGDMSLKEKFMKYDRTMLVGDPRRTEPHKPNRSTKGPRAKRQKSYR
131		TRUE	PFDSM3638_05660	type III-B CRISPR-associated protein Cas10/Cmr2	100.921	7.02569	1	92.9 (M.score:92.9)	3	3.90356	3.35327	131	MVNIKEKLFVYLHDPPDKALKIENHEERSKKILSSGNIQYSRTDKVKQADALSSKTQRFIIRTKENKEPVIDFLGRSSGKYFHVGYPVFIHPISTEIKRYETLEKYIDLGRSNRGERFVNEFLERVSKLEGDVLKEVFEDASNKFKGEESKQWAYIWQFYPVKLKEGVKEFAKSELKLKEEEAEKFAEEFVNLPADTRFPDHAIWTHLDLTSALSVKDPTLLRIKIVPVQPFIANSRKQLDLWASSHLLSMLMYKALEVIVDKFGPEHVIYPSLRDQPFFLKFYLGENIGDEILVANLPNKALAIVSGKEAEKIEEEIKKRIRDFLLQLYREAVDWAVENGVVKVDRSEKDSMLKEAYLKIVREYFTVSITWVSLSEKEDIYQVTENAGLSDEDVKKWL…
132		TRUE	PFDSM3638_05560	hypothetical protein	124.812	4.20448	1	92.5 (M.score:92.5)	2	2.29682	0.876381	132	MRRNAQVFAMVLLLVLSGIPKALALYTPTPFSIDGNLEEWIKADAIAYGRDSGLPGANLDKLYIAWDDNYLYIAIKTNNTQSWDLAYGIGIDVDPGSGNGYTGDSDAWGRKIAFGNNYAIDYEIYFWWSGGSGITADNFINWTGSGWDYKSISDVGGSFAYTGDTSQGLQTLEIAIPWDALGGITRKFAIIAWIAGGDGSSAVDSLPVDDTIVDSDNEWVDQDVFTNLSVIMLSPKNIDGSLDDWADYEKVGSSLPSGYPGADLESLYVSWDSNYLYIAIKTNNTASWDVAYGIGIDVDPGSGNGYTGDTDAWGRKIGFQGFAVDYEIYFWWSGGSGITADNFINWTGSGWDYKSISDVGGSFAYTGDTSQGLQTLEIAIPWDALGGITRKFAIIAWIA…
133		TRUE	PFDSM3638_01995	MoxR family ATPase	34.7931	5.75591	2	92.4 (M.score:92.4)	2	10.9677	1.32735	133	MVSGEKFLLKLKKEIHKAVVGKDEVIELLAVALLAEGHVLIEGLPGVAKTTIAKSFAQALGLKFSRIQLTPDLLPADILGTVYYDQVDGNWKIKKGPIFANVVLADEINRAQPKTQSALLEAMQERQVTIEGKTFSLERPFLVIATRNPLEFEGVYNLPEAQIDRFLLEIKVGYPSIEEELEMLKRKDKGEFYEVKTIFSKSEILEAIETVKRVRTSEEVLKYLHSIIVETRKDERLLVGASPRAAEHLLYAAKAKAFLEGRDYVIPDDVKSMAIPVLAHRLIVKPEYEIEGIKGDTVIKEILDKVEVPI
134		TRUE	PFDSM3638_09620	threonylcarbamoyladenosine tRNAmethylthiotransferase	48.2604	8.63694	1	91.5 (M.score:91.5)	3	7.76471	0.974075	134	MTKVYIENYGCARNRADGEIMAGLLLSSGYEIVEGEENADIVVVNSCAVKDPTEVKIARRIRELLDRGKKVIVTGCLPHVNPDAIDERVSAVLGVKSIDRIVQAVEYALRGEKLISVPDWRKRNLDKLDFPRLSPRGVHFILPIAEGCLNGCTYCATRSARGVLKSYSPEKIVEWVKWAIRQGYKEIWLSAEDTGCYGFDIGTNLAKLLDEITAIEGEFRIRVGMMNPNHVLKFLDELIEAYKDEKVYKFLHLPVQSGDNEILRRMGRTYTVEEFEEIVNAFRREFPDLNLHTDIIVGFPGESEEAFQRSLELIKRIKPDKVNVSRYSPRPGTIAAKWKQLPGWVVKERSRIMHRVRLQISYEINQRYVGRKVDILVHGEGKKGNVDAVTMNYKHIIIP…
135		TRUE	PFDSM3638_01035	30S ribosomal protein S27e	6.87274	9.3827	1	91.5 (M.score:91.5)	2	50.7937	0.861816	135	MAKPIIPMPRSRFLRVKCIDCGNEQIVFSHPATKVRCLICGATLVEPTGGKGIVKAKILEVLE
136		TRUE	PFDSM3638_06820	50S ribosomal protein L7ae	13.3862	5.35131	1	90.5 (M.score:90.5)	2	26.8293	1.5083	136	MAKPSYVKFEVPKELAEKALQAVEIARDTGKIRKGTNETTKAVERGQAKLVIIAEDVDPEEIVAHLPPLCEEKEIPYIYVPSKKELGAAAGIEVAAASVAIIEPGKARDLVEEIAMKVKELMK
137		TRUE	PFDSM3638_01490	ABC transporter permease	46.8285	8.70284	1	89.9 (M.score:89.9)	2	5.64706	1.50835	137	MSDFWVLVTKELKDLLRDKGLIFGIIIVPLIIYPALGQMLQVGFEQAQEETKVVLVNFDEGRYGNLLIKALESAPNVTVTKIEAKTLDEALKKAQEEEYNMIVIIPKNFSQAIESNQKASVEIYGIVKGISGSMREAISEGRINAVISILNEYLAKLKIERRIEGDPEAILKPIDAKSYTVIKGRIVEIPPSVVSNIIASQSFSMPLVIFIMIMLVAQMSAGSMAMEKENKTLETLLTLPVKRITIVAGKMVGTAIIGIIAAISYMIGMRNYLGKLTSSAQVSITLEELGLKITPLGATLFLIIIFLTMVFTLSFAMLLAVFAEDTKTANTVVTAGIMPLAFPTFILMFADVNTLPTVLKYLLLGIPFSHPILASRAMLMEEYSTMYVSAVYLGILSAV…
138		TRUE	PFDSM3638_07110	aspartate aminotransferase family protein	50.7245	5.70112	1	89.8 (M.score:89.8)	2	5.28634	1.12213	138	MELRPNVKEIPGPKAREIIEKHHKYMATTTNDPNEYFLVIERAEGVYWIDVDGNVILDFSSGIGVLNVGLRNPRVVEAIKKQLDLVLHAAGTDYYNPYQVALAEKLVQITPGDFEKKVFLSNSGTEANEAALKIAKWSTNRKMFIAFIGAFHGRTHGTMSLTASKPVQRSRMFPTMPGVEHVPYPNPYRNPWHIDGYENPDELINRVLEYIEEYLFSHYVPAEEVAGIVFEPIQGEGGYVVPPRNFFKELKKLADKYGILLIDDEVQMGIGRTGKMWAIEHFGIAPDIITTAKALGGGIPIGATIFRKDLDFGVSGVHSNTFGGNAVAAAAALAVMEELENGLLENVQKLEPLFRERLEEMKEKYEIIGDVRGIGLAWGVEFVKDRKTKEYATKERNEV…
139		TRUE	PFDSM3638_03055	hypothetical protein	13.6565	8.89062	1	89.6 (M.score:89.6)	2	15.2	1.43729	139	MEIDKGLAKFGDSLINFLYSLALTEFLGKPTGDRVPNASLAIALDLTGLSKNLRRVDKHAKGDYAEALIAKAWLMGLISEREAVEIIKKNLTPEVLDFSKKKEAIGRALAPLLVIISERLTSSQV
140		TRUE	PFDSM3638_00275	RNA-binding protein	65.9645	8.13108	1	87.8 (M.score:87.8)	2	5.26316	0.90924	140	MEVIKHDGPGRLGVIRLEPPVQTPALAGVDFTLSPFNSFFYPKDYKEYDFNLAPAIPLSYYTPDEIIKKAVKRLWEVDYSKFNAFYFPALKRTKHYEELFKIIEENDFDAIYIGNSKSMIKDYRGFVFTMRELREKFPNAVLITDLEPFFYPLAVYLGIDAFDIRSLKIYSYEGLGFTQFSPIIWDEPKEDPVEYAKKIIRLIRIAIHEGKLRYLVENFLPTSMNAGILRIADRENIEYLEKYTPVDDKTVVFISDYSMTRPEVYRWAKRVRERFEPPKDIELLLILPCSAKKPYSRSRSHTLYRSAVKEALGEKMHRVHELIVTSPYGVVPREWEWIAKYDIVVTGHWSEREVRLAGELLADVLEKYPDIPIIAHVEGGYREAVKLAMELSGRDVIFT…
141		TRUE	PFDSM3638_08345	30S ribosomal protein S13	16.9042	10.8991	1	87.7 (M.score:87.7)	2	16.2162	0.219464	141	MANFRHIVRVAGVDLDGNKQLRWALTAIKGIGINFATMVCRVAGLDPFMKAGYLTDEQVKKIEEILADPVAHGIPRWAVNRPKDYETGRDLHLITAKLDMAIREDIMRLRRIRAYRGIRHELGLPVRGQRTRSNFRRGQTVGVSRKKK
142		TRUE	PFDSM3638_06260	alkaline-shock protein	27.8791	9.58201	1	87.5 (M.score:87.5)	2	12.7049	1.29495	142	MKSPEILKEVSENLIKTIEKLEKVKVFEEKRKRKLISLLEEASGNFLKLSGEVENDNVQMAEFLRKRSVEIKNNTNDKAIERMGEKEYIKAVEKMNLYSKTAFYDFKPTMLRKLKKAYRSFIFGMALYFVLAGLSTRPELAVTALILAIPAILSMLSLQRRGYTGLMLAYAVAPIPMIQSPMLIRMFYGVLRDPEAIRTAAEYLGKSETFIVVYAYVVIILSIVDFALLAYGLYGLTKHRHAFL
143		TRUE	PFDSM3638_07220	NADH-quinone oxidoreductase subunit NuoD	44.6732	5.66416	1	84.5 (M.score:84.5)	2	5.88235	1.18651	143	MVSQEELIREARQNGMELYPIDKDTYELFFGPQHMATENFSIILKMDGNRVVKAIANPGFLHRGFEKLAEYRPWYTNIALLLRICVPEPDVPEAIYSMAVDEIIGWEVPERAQWIRTLVLEMARVTAYLFWIMGLSFKLGVYTAGQWAAAYRERFMALFEQLTGARVYHIYTIPGGVRRDIPGDKWLRQVRDTVEYLKDKLKDFDNVLFENYITYKRLEGIGVMDKKFALEEGVTGPNLRATGVAYDVRKSDPYLLYPELDFEIPVLKEGDALARVLVRRYELEQDLYIIEQLLDMGPPSGPYKVQDPKLKNLPRFKVPPGEAFAHVEATKGDFGAYVVSDGGHKPYRVHIRGPSIAHGVRVLEQLLVGARLADVPAILMSLDNCPPDIDR
144		TRUE	PFDSM3638_07575	DNA cytosine methyltransferase	78.45	5.67773	1	83.1 (M.score:83.1)	2	3.29513	3.09804	144	MKKASILLIIMLIASGLTIFNPKALGLEKYSTLTVGLKLGGYIEFGGKYAVKFADVDPTNWNRAAIEIYENGNRVARKILEEGQTMYYPDENNPLFGVEVTGIWESQKTAYIEIKTPVKLFKENITLKEGESYTMPSGFPQYKITVRDVPSDTKAELTIRYPDGTTVTRTLEKDYPVGVPYKISSELTQSSVLVIEYVKASKDKSVTFNLYIAKMIFAPAKVVQPEEQKEEKTTTEEPIQVVYDDVIYAGEKVTITYNKTTYQIQLVSVGYYSKFDLIIDDKSVETATVKEGGSYIFTKAPLRVEVIPNTVDLKYNRLQAKIYAPIGASGSVILREANITVRLDISQNRVLLGEEIIVFIKVKNEGKGNAFNVKVLAPIPNNFELISGIGTWELSRLEP…
145		TRUE	PFDSM3638_07185	NADH-plastoquinone oxidoreductase subunit	15.6752	8.74482	1	80.0 (M.score:80.0)	2	14.3885	0.716963	145	MIRLPLLPTVIKNLFKKPATNPFPKTEPVPVPEDFRGKLVYNVDKCVGCRMCVTVCPAGVFVYLPEIRKVTLWIGRCVMCKQCVDVCPTAALQMSDEFLLASYDKYDAKLIYLTPEEAEDIKKKLEEANKAKAEKQASK
146		TRUE	PFDSM3638_08165	myo-inositol-1-phosphate synthase	42.3595	5.62742	1	78.7 (M.score:78.7)	2	7.04961	0.903609	146	MVRVAIIGQGYVASIFAVGLERIKEGELGYYGIPLANELPIKVEDIKIVASYDVDKTKIGLPLSEIVQRYWKGNVPESLQEVFVRKGIHLGSLRNLPIEATGLEDEMTLKEAIERLVEEWKEKKVDVIINVPTTEAFTPFGKLEELEKAIKDNNKERLTATQAYAYAAAQYAKEVGGAAFVNAIPTLIANDPAFVELAKESNLVIFGDDGATGATPLTADILGHLAQRNRHVLDIVQFNIGGNTDFLALTDKERNKSKEYTKSSVVEDILGYDAPHFIKPTGYLEPLGDKKFIAMHIEYISFNGARDELIIAGRINDSPALAGLLVDLARLGKIAVDKKEFGTVYPVNAFYMKNPGPKEAKNIPRIIAYEKLRQWAGLPPRYL
147		TRUE	PFDSM3638_05580	hypothetical protein	22.082	6.36346	1	78.5 (M.score:78.5)	2	7.65306	0.259043	147	MVRRRGAYPEYTLEDALAVLFLAKEPIGRKQISEILELGEGSVRTLLGRLTKKDLIRSKQRGHFLTTWGHEVKKKIEELFSEPIEVTVDGFPGVAIIVKNPGGFKSLELRDEAIKFDAKGAMILTVKNGEIVFPEDSRPLKEMYPEIVKRLYDYEEGDLIVITWADKIGRALKAALHVAVVLKGDQLPREILEVAE
148		TRUE	PFDSM3638_03390	ATP-dependent DNA helicase	82.58	6.2952	1	78.0 (M.score:78.0)	2	4.72222	0.840227	148	MRVDELRVDERIKSTLKERGIESFYPPQAEALKSGILEGKNALISIPTASGKTLIAEIAMVHRILTQGGKAVYIVPLKALAEEKFQEFQDWEKIGLRVAMATGDYDSKDEWLGKYDIIIATAEKFDSLLRHGSSWIKDVKILVADEIHLIGSRDRGATLEVILAHMLGKAQIIGLSATIGNPEELAEWLNAELIVSDWRPVKLRRGVFYQGFVTWEDGSIDRFSSWEELVYDAIRKKKGALIFVNMRRKAERVALELSKKVKSLLTKPEIRALNELADSLEENPTNEKLAKAIRGGVAFHHAGLGRDERVLVEENFRKGIIKAVVATPTLSAGINTPAFRVIIRDIWRYSDFGMERIPIIEVHQMLGRAGRPKYDEVGEGIIVSTSDDPREVMNHYIFG…
149		TRUE	PFDSM3638_06470	hypothetical protein	15.7273	5.96024	1	77.7 (M.score:77.7)	2	11.1111	1.30089	149	MFEEVEVEAYVYPTEDIEKVKKAMLNLVPGLKFEAFDKGEYMILVGRTRDKRALQRLYELFRGQQILDTARMMLEEGYFGEEIIIKVHKQVAYVGKVNFNEESPLGPITIIIRTKEPQKLMKWLAPRTKDGVPIE
150		TRUE	PFDSM3638_09925	anaerobic ribonucleoside-triphosphate reductase	70.0734	5.8733	1	77.3 (M.score:77.3)	2	3.63636	0.826275	150	MEKVDIIHEYARWGSLDVLENANRYPGPSGFFAYVMEEALKSSLSLIPEVGLRAHFSGDIYIHKLPYSLYIPYCTGHSIARLLKRGLRTPTITSRPAKHFDTFVDHIANYLITLQHYFSGAQAFSSVEWYAGPFIRKENLDLRKVKQNIQRLVYNLNYPTRIGLQTPFTNFTVTLDAPKKMLEGDYAIYNGEEVAPLGEYEREAKMFILALTEVLREGDALGQPFTFPIPTLMVTADMIWNDPEVFEAIFTTAAKRGSFYWLNTNVVDPDASYAMCCRLNIDKREFTYTFSLDEDVEKLERQRFGGLWAMPDVTGSVNVTTVNLPRIALKSRDEDEFWEEYEKTLEIVRITTEWFRNRYVKLLSMYPHMYSMIRDYLEEFPSSHFNTIGILGLPEAAAL…
151		TRUE	PFDSM3638_00860	ATP synthase subunit B	51.8828	5.34074	1	76.9 (M.score:76.9)	2	5.41126	1.35844	151	MAKEYSTISRIYGPLMIVEGVKGVAYGEVVEIETEWGEKRKGQVLDARENLAIVQVFEGTRDLDIKTTRVRFTGETLKVPVSMDMLGRIFNGIGKPIDGGPEIIPEDRRDVHGAPLNPVARAYPRDFIQTGISAIDGMNTLVRGQKLPIFSGSGLPHNKLAAQIARQAKVLGEEESFAVVFAAMGITYEEANFFKKSFEETGAIERAVLFLNLADDPAIERIITPRMALTVAEYLAFDYDMHVLVILTDMTNYCEALREISAAREEVPGRRGYPGYMYTDLATIYERAGRVRGKKGSITQMPILTMPDDDITHPIPDLTGYITEGQIVLSRDLHRRGIYPPIDVLPSLSRLMKDGIGKGRTREDHPQLAQQLYAAYAEGRSLRDLVAVVGEEALSETDK…
152		TRUE	PFDSM3638_09125	50S ribosomal protein L14	15.2274	11.3435	1	75.1 (M.score:75.1)	2	22.695	0.956418	152	MAKKGAGATRGVSAVRPTRALPVGAYLTVADNSGAKVIQIIGVVEYHGTRRRLASAGVGDMVVATVKKGRPDMRHQVVRAVIIRQRKEYRRLDGMRVKFEDNAAVIVTPEGVPRGTEIRGPVAREAAERWVRIGSIASIIV
153		TRUE	PFDSM3638_07990	signal peptide peptidase SppA	37.2886	5.5581	1	75.1 (M.score:75.1)	2	8.20669	1.09785	153	MPEGVWKYISFILALVLSFSIAANALLYLQVGELQSTTYKLQKILPSQTNITTNYTTLQLKIEELKKEIEYLRAYIQKQNETANGSLAIVPIFGLIDENMALEVVKKLEVIKSDPSIRGVLLWIDSPGGYIGPVRAIYKEVKELAYIKPIVAYISGYATSGGYYIACGADKIIADPYAQVGSIGVIYVHFNAQKYYEMNGIEVEVFKTGPYKDMGADWRGLKPEEREIIQKQIDVYFKTFLDVVMEGRNLNETKVKEYADGRAWFAYEVNGTLIDDIGDLQYAIEETKKLANLKSANIVIFDVKPSNFEIRGSSALYLPQEYVYKYIRR
154		TRUE	PFDSM3638_03365	methylmalonyl-CoA epimerase	13.5676	9.24651	1	75.0 (M.score:75.0)	1	11.0169	1.016	154	MSQLLEGLYITILGIVVVFSVLAILAIVMDLIGRTERKLVEKEKKKEVEDKKVEPVKVEKKLDEKKIAIITAAILAYLRGKQPKEVPIKRKPSPNWWLSGLITQMEEVENFNYEIGKW
155		TRUE	PFDSM3638_04885	hydroxymethylglutaryl-CoA synthase	38.1767	7.75457	1	73.0 (M.score:73.0)	2	7.71429	0.613733	155	MRKVMKPMKDVGIVGYGAYVPMYRIRNEEIGRVWGVSSFPIEEKAVPGLDEDAITIGIEAARNALKRAKIDPQKIRAIWFGTESKPYAVKPSATIIAEAIGATPDLEAADFEFACKAGTEALQAAIGFVGSGMAEYAMAIGADTAQGRPGDHLEFTAGAGGAAFIVGEKSNESVAYFEGSYSYVTDTPDFWRRQHEHYPRHGNRFTGEPAYFHHIINAAKTLMEELGLKPSDFDYAVFHQPNVKFPLTVAKILGIPKEKVLPGLLTGRIGNTYSGATMVGVSAVLDIAKPGDRILWVSFGSGAGSNAFSIVVQDAIEEKRDLAPKVEDYVKRRKVIDYALYAKARRKYIL
156		TRUE	PFDSM3638_03375	sodium ion-translocating decarboxylase subunitbeta	42.2339	6.9239	1	72.4 (M.score:72.4)	1	4.5	0.483515	156	MGLEQAVVDFFNHMGLLNLTVGNVVMIIVGLTLVYLAIRYEMEPLLLLPIGISAVLVNLPLSHMANWPLAPQLPPEIQENIFATISYLSQQYGPPGLFDLIYYLLIKTEVVPLLIFFGLGAMTDFGPMIADPKTALLGAAAQIGVFVAMLVALALGFNLKEAASIGIIGGADGPTTIYLTTKLAPHILSATAVAAYSYMSLVPLIQPPVIKALTTPEERRIRMEQLRPVSKREKILFPIASMIVIGLLVPSAAPLIGMLMIGNLFRESGVVQRLSKAAQEELMNIVTIFLGLGIGSTMRAESFLTPKTLMILALGVVAFASATAGGVLFGKIMMKISGGKINPMIGAAGVSAVPMSARVVQRLASEEDPGNFILMHAMGPNVAGVIGTAVVAGVFLSALG
157		TRUE	PFDSM3638_09715	KaiC domain-containing protein	27.6356	8.56025	1	71.8 (M.score:71.8)	2	11.7409	1.62907	157	MVRRVKTGIPGMDEILHGGIPERNVVLLSGGPGTGKSIFSQQFLWNGLQMGEPGIYVALEEHPVQVRQNMAQFGWDVRKYEEEGLFAMVDAFTAGVGKSKEYEKYIVHDLTDIREFIEVLRQAIRDINAKRVVVDSVTTLYINKPAMARSIILQLKRVLAGTGCTSIFVSQISVGERGFGGPGVEHGVDGIIRLDLDEIDGELKRSLIVWKMRGTSHSMKRHPFDITDKGIIVYPDKVLKRGRIYEL
158		TRUE	PFDSM3638_09365	DUF655 domain-containing protein	24.2949	9.07049	1	71.1 (M.score:71.1)	2	9.26829	0.778406	158	MDYHRRHPYHHSIKKKMNVEYEEYAYVLDYLPNGYPDLRTGHYLGKPVAQVIGEKAFTLLEVTPKVDLMLYERVYVGKGERDKVLKINKKLTYDELTDTAKAELPYVLEEIVKNNEDRFVKFFNIAPPITNRLHSLELLPGIGKKHMWEIIEEREKKPFESFEDLKKRVKGLPDPVKMIAKRILEELQGKDKYRLFVGSNRIFRE
159		TRUE	PFDSM3638_04460	cytochrome-c3 hydrogenase subunit gamma	33.032	8.95011	1	71.0 (M.score:71.0)	2	7.19178	1.33265	159	MMLPKEIMMPNDNPYALHRVKVLKVYSLTETEKLFLFRFEDPELAEKWTFKPGQFVQLTIPGVGEVPISICSSPMRKGFFELCIRKAGRVTTVVHRLKPGDTVLVRGPYGNGFPVDEWEGMDLLLIAAGLGTAPLRSVFLYAMDNRWKYGNITFINTARYGKDLLFYKELEAMKDLAEAENVKIIQSVTRDPNWPGLKGRPQQFIVEANTNPKNTAVAICGPPRMYKSVFEALINYGYRPENIFVTLERRMKCGIGKCGHCNVGTSTSWKYICKDGPVFTYFDIVSTPGLLD
160		TRUE	PFDSM3638_07125	cation:proton antiporter	9.05416	5.9188	1	70.7 (M.score:70.7)	1	11.9048	0.266657	160	MIFFYATLLIGIAGIITFIRLALGPTVPDRVVAVDTLNTLIVAIMLLLGAAYERAIYIDIAIVYALLSYVGTLVIAKYLQGGLQ
161		TRUE	PFDSM3638_06240	hypothetical protein	81.5928	4.93656	1	70.0 (M.score:70.0)	2	3.14208	1.23732	161	MKRFFAFAMVLLFLLSALPVFGAQEYVKKVSVFSGHLKEDQKLQINEYLIRIEFGIDGSPYVIIEANNSIKEILKADFGAEVETGNLIVSCGSYDAEKGLFIVVLWKAIGEEYKVEKGSFVKNFEVLEVNSTEITIERGTSVFYIKANESVKVDKYILEFTGKSLVIYELPQVTVKGEKTFEISVSFPYKEVVAKPGDVLSFPIVIENRGDNSTVISLEFLRIPKDWSAEFLYQGIAVRSIEIPKKSAVTLTLNVQIPEEYSGREIIEFKVNSEVHRVVIDVKGETRKGKVEVITSIISQDAEAGEEIKFPLVIQSTIEANVSVEIGVPEGWDAHSLYMGSRVSMIHLSEEDSKTLEISLDVPRGADLGRYEIPVTLSISGNEYSETKVVTFFVNIYKT…
162		TRUE	PFDSM3638_01495	ABC transporter ATP-binding protein	27.2376	6.68678	1	67.6 (M.score:67.6)	2	12.6531	2.10282	162	MKAIVVEDLEKDYGKVKALKGISFEVKEGEIFGLIGPNGAGKSTTLKILATLLVPTGGRAEIFGYDVVEEAEEVRKLISYLPEEAGAYKNLTGYEYLEFMAKLYAKTGKDYKKMLETGVELSGLGERLKDRISTYSKGMTRKLLLARALMVEPKLAILDEPASGLDIINAYSIRQTIKQFAREKGITFLLSSHNMLEVEFLCDRVALINKGRIVEIGTPKELKEKYNAENLEEVFMSIVGGKKVE
163		TRUE	PFDSM3638_03205	type I-A CRISPR-associated protein Cas7/Csa2	37.4246	6.35619	1	66.3 (M.score:66.3)	2	8.5044	1.59897	163	MMYVRISGRIRLNAHSLNAQGGGGTNYIEITKTKVTVRTENGWTVVEVPAITGNMLKHWHFVGFVDYFKTTPYGVNLTERALRYNGTRFGQGETTATKANGATVQLNDEATIIKELADADVHGFLAPKTGRRRVSLVKASFILPTEDFIKEVEGERLITAIKHNRVDVDEKGAIGSSKEGTAQMLFSREYATGLYGFSIVLDLGLVGIPQGLPVKFEENQPRPNIVIDPNERKARIESALKALIPMLSGYIGANLARSFPVFKVEELVAIASEGPIPALVHGFYEDYIEANRSIIKNARALGFNIEVFTYNVDLGEDIEATKVSSVEELVANLVKMVGGKE
164		TRUE	PFDSM3638_01425	hypothetical protein	17.5062	4.67722	1	66.2 (M.score:66.2)	2	12.8205	0.20505	164	MVEVEKIEKLIEEISEEIKKAKTPEEVEVLERKVKSLKSLIEAIEGDKALDEVAMLMDKLGPMIEDVLGPIKELISELYNPERMAALGKSVAQFYKDLVEAGMDKEAALELTKEYMASINLFKSLMESLTKVVSMKGNIPFGGPKIEIEKEEEGRE
165		TRUE	PFDSM3638_08095	CBS domain-containing protein	17.9788	8.70904	1	66.0 (M.score:66.0)	2	12.5786	1.25756	165	MDLERALNAFHSMKVNQLTPPCSQMPIVEEDSPIIDVLKLLRTRHHVWVVNNRKDMKLVGIIRYLDIIDIFLPPKGARLGAVSSVFKSILSGAEKAGDIMERNFLTINEDATVLEALEKMKRYKIQILALIDEEGKLKGEISLRILINEFLRLIRVGGG
166		TRUE	PFDSM3638_07030	proteasome endopeptidase complex, archaeal, betasubunit	22.3698	6.84261	1	65.5 (M.score:65.5)	2	11.6505	0.550006	166	MLHLKEKLKGTTTVGLVCKEGVVLAADTRASLGNIIYAKNVTKIHKIDEHLAIAGAGDVGDILNLVRLLKAEANLYKSTVGKEMSVKALATLLANILNGSKYFPYLGWFLVGGYDEKPRLFSVDMVGGITEDNYAAAGSGMEFAYSILDSEYREEMSVNDGIKLAVKAINVAIKRDVFTGDGLLVVTITKDGYKEYRGAELEKMLK
167		TRUE	PFDSM3638_05565	putative methyltransferase	40.3017	4.68021	1	64.4 (M.score:64.4)	1	2.5788	0.160279	167	MKEIVERVKTKTKIPVYERSVENVLSAVLASDDIWRIVDLSEEPLPLVVAILESLNELGYVTFEDGVKLTEKGEELVAEYGIGKRYDFTCPHCQGKTVDLQAFADLLEQFREIVKDRPEPLHEFDQAYVTPETTVARVILMHTRGDLENKDIFVLGDDDLTSIALMLSGLPKRIAVLDIDERLTKFIEKAANEIGYEDIEIFTFDLRKPLPDYALHKFDTFITDPPETLEAIRAFVGRGIATLKGPRCAGYFGITRRESSLDKWREIQKLLLNEFNVVITDIIRNFNEYVNWGYAEETRAWKLIPIKKLPEYNWYKSYMFRIETLEGSRGYEDEIPEEDIYNDEESSTT
168		TRUE	PFDSM3638_09740	sugar ABC transporter permease	33.8404	9.62954	1	63.7 (M.score:63.7)	2	10.0671	0.606465	168	MKKTTVAALMLIIPGIAAFLFFNLWPIVYSIYLAFTNAKLGNFPIQSPTAEPLRFVGLENFKWLLKQEKFLNAFKWTWIFVATSVTLKVLAGLFLSLLYNSKYVRGKTIYRSLLIIPWALPLLFSVTVWKFMFDPVFGPINLTLKSIGVEGPNWINDPFWGFIALNIIEVWLAYPFMMTVITAALQSVPDVLIEAAIIDGANYWQRLRHVVLPVVGKPIAFATILTSAASFQYFMVPYIYNAGLFEDRFILLYGFRQAFGATPYYGRATAVMIIATIILAIYMYVNVKITRLQEGAKE
169		TRUE	PFDSM3638_00820	TrkA family potassium uptake protein	25.4387	5.40728	1	63.5 (M.score:63.5)	2	8.69565	1.41571	169	MYVIIMGAGRIGTLVAKMLENSGHDVAIIEMNKDRARAVSDIVSGLVIEGDATDQNILESANVRNADAFVALTGKDDANILACILAKHLNPRIMTILRITDPRKKKIFEEVKDLKKYFDVVVSPEDIAANYIFRVVITPGFDRVLLPREGAEIIQFHIDENSKVAGKAVKDLNLPRDSLIIAIYDEKGNLIIPSGETILPKRGTVVVFAKDSALKEIKKIMEEKVEESEE
170		TRUE	PFDSM3638_07860	NusA-like transcription terminationsignal-binding factor	16.444	9.48566	1	62.5 (M.score:62.5)	1	6.2069	1.55628	170	MPLKLTTDQIKYIALFESFTGATVLDCLIDQERNKLIYVIKKGEMGLALGRGGINVRRIEGLIGKEIDLVEHSENPEEFIKNIYRTMGVKVKKVHITEKRDGKKVALLDVNPRDKPRAIGRGGRNINIVKQLMERHHGIEDVIII
171		TRUE	PFDSM3638_01965	multidrug transporter	83.1591	5.68649	1	62.2 (M.score:62.2)	2	2.7027	0.922047	171	MAVKDCPECGGSGKVKVGEKECSVCNGWGYVPADFKLTDHLKGYRNLENFGVDEEVDEIPCPECHGKGTVPVYDTCPTCGGTGKVLACDICGKVKGPWEPGMETTWVCPECERKFKVVYVLDNACDYEDVEIGSYYKGVIDRVERFGVFVKLNKHVIGLIKKKDLLGKREYKPGDEIIVQVLDVRPDKREIDFLEAPLTKYREVHVKKELPVTPIEELKEELAGRTVKIRGKVTQVQVTGGPTVFTLTDGTGITWAAAFEAPGVRAYPNINVGDIVEIIGKVSFHAGSIQVEVIDMYRLWGPDAAEVKRKIEEELDRRAQPSDVGFLVKSEVLEALKPKIMKAAFMIRRAIFEGRPIILRHHADTDGYTAGVALETAIIPLIEKVAPDPEARWHLFKRR…
172		TRUE	PFDSM3638_06295	hypothetical protein	50.0321	9.59867	1	62.2 (M.score:62.2)	1	2.84464	1.60062	172	MNRSLYLIFIIVGYTLGIWTFTVIPKIYMTIGLKGLVLMLVFSAVVVAGVLGQINSIKEKTYRIHEFMVKSARLPAVSVVLVSFLFFVSAVVAHYTGLAVEKLFGIGAPGFGLIIALVAMIILIGTRGRSLDAIAIFSILLIILIIISVFFLRSKVSEVVVKETSREFVRTTLETVFSFSGELNMRTVVLTFLTTLMMFGLGVGFYYIIGMTISGWKFDIKKVLAVVVILQALLSLSAALILTYSIGAAHQAYWSAFEKGKAMEALDVYDKYFLPLWREYTSPERMNFLRLIDTVYGIPDILRKLGMEGGTYIIAFLMISLFFAGFTTLLVLIETGGQIISDMFQVTRKNAILIVSIITGILSTLLSLPAIKEVLVVLVALMLPLFALIESLPALKATK…
173		TRUE	PFDSM3638_09085	50S ribosomal protein L19e	17.8572	10.9291	1	62.0 (M.score:62.0)	1	6.66667	0.575581	173	MNTLKMQRRIAAEILKCGENRIWIDPERIDDVASAITREDIKRLIKEGVIKKKPIKGQSRYRAKIRHEQKKKGRHRGPGSRKGKKTARMGKKELWIKTIRALRKELRKLKAQKKIDRKTYRMLYIRAKGGQFKNKHQLYLFLEEHGLLKK
174		TRUE	PFDSM3638_09175	50S ribosomal protein L4	28.6909	10.632	1	61.8 (M.score:61.8)	2	11.3725	1.38939	174	MKVKVFDLNGQPVGEIELPKVFFTPFRPDLIRRAVIASWTHRIQPQGRDPMAGKRRVTENIGKGHSMARVERLKTPPRYAAFVPFARGGRRTHPPKVEKIIWEDINKKEKRLALMSAIAATANYDLVRARGHIIDNVPQLPLIVVDDLQKVQKTRETREIFKKLGIWDDIVRAKEKSGVRAGKGKMRGRRYKKAKGPLIVVGKNEGIVLGARNHPGVDVVVVDNLGVEHLAPGTHPGRLTVWTVSAIERLRELYG
175		TRUE	PFDSM3638_06310	cystathionine gamma-synthase	41.1776	6.15859	1	61.6 (M.score:61.6)	2	6.8306	1.33985	175	MEPLHYPIYLTAVFKQIGDAYLTERGTELKYSREENPTVRNLEDKLAKLENAENALAFNSGMGAISTLFLSLLKAGDEIVMSMEGYGTTIEVPKLLEKFGVRVRLAYPSAEKICETITSNTTLVFIETMTNPTLKVIDVREVAKKCREEEITLIVDNTFVTPILYRPLEDGVNFVVHSLTKYIAGHNDVTGGVILWNGKFLNDLWDWRRRLGTIIQPFDAWMVERGMRTLNVRFEKQSKNALAIAEFLQDHPKVRKVHYPGLPSDPYHGIARRLFRKDLYGGVVSFDLGSEKSALAFLRSLKKIFPSPSLGGVESLATYPVKSAVKNMEKETRDLLGITDGLIRLSVGIEEVDELIEDLDRALKGC
176		TRUE	PFDSM3638_03210	hypothetical protein	13.387	6.35213	1	61.5 (M.score:61.5)	1	9.16667	0.694845	176	MGGWIRNIGRYLSYLVDDTFEEYAYDVVDGIAKARTQEELLEGVYKALRLAPKLKKKAESKGCPPPRIPSPEDIEALEEKVEQLSNPKDLRKLAVSLALWAFASWNNCPKKGKGTEGGVE
177		TRUE	PFDSM3638_06355	urea amidolyase	36.5872	8.9986	1	61.5 (M.score:61.5)	2	8.20669	1.87876	177	MIEVLSVITSATVQDLGRWGYQRYGVPVSGVMDEVSARIANYLVGNPDNTPLIEFTAGGISIKFHTSAVFAVTGDATLYLNDTQLEPWESYWAKRGDVLTVRLSKGMYGYIAFSGGIECRKILGSCSTYLRAKFGGLLKPGDKLKLGYSLLTGKAGKRLPEELRPRFDKTVRVILGPNIEHFTPEGMRTFLTSEYTVTPESDRMGYRLEGPRIEHSEKGADIITEPIPRGAIQVPANGKPIIMLADAQTTGGYAKIATVIRVDIPMVVQTRPGEKLRFKAVSVNEAVQELRKRERIMNAIRKALQDEWNLYRIKVGKEEFLIFAGMEED
178		TRUE	PFDSM3638_06050	ABC transporter substrate-binding protein	71.5616	5.18031	1	60.9 (M.score:60.9)	2	4.82315	1.2974	178	MKRLVGVLIGAFVIFGVFGQVVAAQEQELPREETLYVGGGLWSQPNNFNPLIPWSAVTGTIGLIYETLFNYDPLNDKLEPWLAESGRWVSDNVYEVKLREGLTWQDGKPLTAEDVKFTFELHKKYPGLAYHQMWEWLQEVKVIDDRTIQFVFSTPHYEEWKYLLYQIAIVPKHIWQNIDNPVEFANVDNPVGSGPYKLYKTDQMRFILVRNDNWWGIKYFGKPAPKYIVYVIVYSNNLALSMLVKGELDWSNFFIPGVPDVKAQYGIVTWYDEPPYHLPANTAFLFLNTQKPPLDNPEFRRAIAYAINPEEIAARASQNQVTPADPTGLLIQYPAFKKIYNKEAVDKYGFKYDPQKAMEILDKLGFKDVNGDGYREFPDGKPLKLTIIVPFGWTDWMEM…
179		TRUE	PFDSM3638_05200	50S ribosomal protein L21e	11.3343	11.416	1	60.9 (M.score:60.9)	2	17.5258	1.56082	179	MVQKAHSFRRKTRKKLSKHPRRRGLPPLTRFLQEFEVGQRVHIVIEPSYHKGMPDPRFHGRTGTVVGKRGEAYIVEIKDGSKVKTLFIHPVHLRPQK
180		TRUE	PFDSM3638_08330	DNA-directed RNA polymerase subunit D	29.7627	4.8839	1	60.4 (M.score:60.4)	2	10.728	1.47152	180	MAGIEVQILEKKEDSIKFVLKGVHVSFANALRRTILGEVPTFAVDEVEFYENDSALFDEIIAHRLAMIPLTTPVDRFELDALELDDYTVTLSLEAEGPGIVYSGDLKSDDPDVKPVNPNIPIVKLAEGQRLVFNAYAKLGRGKDHAKWQPGFVYYKYYTIVHISKSIPEWKELKKLAKKRGLPVEETEEEVLVTTIKPFYIPKDFEEYEGKEIWEEIVPNTYIFTVETNGELPVEEIVSIALKILMRKADRFISELQKLTS
181		TRUE	PFDSM3638_06880	30S ribosomal protein S10	11.7414	10.2275	1	59.1 (M.score:59.1)	2	18.6275	0.930681	181	MQKARIKIASTNVRSLDEVANQIKQIAERTGVRMSGPIPLPTKRIRITTRKSPDGEGSATFDRWELRVHKRLIDIEADERAMRQIMRIRVPEDVTIEIELIS
182		TRUE	PFDSM3638_09695	translation initiation factor 2	23.4404	6.77917	1	59.1 (M.score:59.1)	2	11.165	0.665479	182	MEEYYVCPECGSEDVEVIKERGREVTLRCNECGYVWMITLPKLREIPVIVSKHERSFREKAVLPEDEVIKVGDVIEIENDQVKVLSIELPGGKRVRKAKVAEIQTIWGESLTYPKVFGVSIYLPGGITQSFKVVVDREEEFVVGEVIEVGGYTFKVEMIKTEKKLMRSGKAKAENIVRLMGHAIKGRARRKLKIYEGYDSISAENQ
183		TRUE	PFDSM3638_08210	DUF356 domain-containing protein	14.8693	9.43279	1	58.9 (M.score:58.9)	1	7.57576	0.00254335	183	MLNTIVLIRTDNFDKALTALADLVRYGGMKIRGTPRIIPPALSDWAFEQIVGEKPKKKVKAHVVAQIDLPASKAIGRIRDIHPPAHIIVIPVGSPVHKELLRLWGTFKELKGFHPPKEIKRLENIENEEDLE
184		TRUE	PFDSM3638_03915	IS982 family transposase	33.8114	9.76391	4	58.8 (M.score:58.8)	1	3.80623	1.07143	184	MVVLSFQRKILIIKSEIYPIVSKHYPKNTRREVISLYDLITFAILAHLHFNGVYKHAYRVLIEEMKLFPKIRYNKLTERLNRHEKLLLLAQEELFKKHAREYVRILDSKPIQTKELARKNRKDKEGSSEVISEKPAVGFVPSKKFYYGYKLTCYSDGNLLALLSVDPANKHDVSVVREKFWVIVEEFSGCFLFLDKGYVSRGLEEEFLRFGVVYTPVKRGNQISNLEEKKFYKYLSDFRRRIETLFSKFSEFLLRPSRSVSLRGLAVRILGAILAVNLDRLYNFTGGGN
185		TRUE	PFDSM3638_04840	AAA family ATPase	94.0593	5.55532	1	58.7 (M.score:58.7)	2	3.7037	1.41913	185	MIIGRGEERKEEIKLRVAEALKWDVGRGIVRFDKKYQRMLGVEPGDIVEIEGNRITAAIVANAHPDDRGLDIVRMDGYIRKNAGVSIGDYVTIRRAEVKEAKKVVLAPAQKGVYIQIPGDLVKNNLLGRPVVKGDIVVASGRSEFYTGTPFDEIFRGFFEMSMGFGELKFVVVSTVPRGIVQITYNTEVEVLPQAVEVREEKVPEVTYEDIGGLKEAIEKIREMVELPLKHPELFERLGIEPPKGVLLYGPPGTGKTLLAKAVANEANAYFIAINGPEIMSKYYGESEERLREIFKEAEENAPAIIFIDEIDAIAPKREEVVGEVEKRVVSQLLTLMDGLKSRGKVIVIAATNRPDAIDPALRRPGRFDREIEVGVPDKQGRKEILQIHTRGMPIEPDY…
186		TRUE	PFDSM3638_00180	DUF2067 domain-containing protein	25.6998	5.66576	1	58.6 (M.score:58.6)	2	8.21918	2.36829	186	MRAKKVIVLHVRDDIEKEEFMKEVQRLNLSAFIYIHGKLDSLKVNVQGTKEEIREAIRAIRDAHKRVRGRLYPDRKGLYTYYPEDIFREANANISLPILIKTLELLGERVEVKEDYIKSSMPWREIVELVRRLNEVLSQIALQTTRQIREVVAPVSVAYKIDPEELLDLLVDLGIAEYKEDKFKYELVKNKEQALKELLEYLEGDKDEDRSDKEGRESA
187		TRUE	PFDSM3638_07935	regulator	18.9724	6.85639	1	57.5 (M.score:57.5)	2	15.0602	0.747468	187	MWGKIEHYFDEYPVRKLIAKTLLRYGLRVSEDMKIKAGEIEVPYTKIAKALNVDRRVVKETVAMILKTPELRDIYMNLEPTVHMKYVGKHVGYGVIEIEPEPRAIGILAKIAQKIAEREINIVQVVAEDPELYPEATLTIITEKPIPGDLINELSKLEGVKRISIY
188		TRUE	PFDSM3638_05005	hypothetical protein	35.6834	4.76577	1	57.3 (M.score:57.3)	1	3.55987	0.943596	188	MRKGILIFTLISFLLLNTPVLAQEPLNNIDLQPFLKLTMNVTLVNTGEYPKFIAVNPTYDFKTFREGDEYLLHNTTDLIQLSKANLILNKRVGFWIYPHEVLKVEFSINIPMDLGELYLQDYADLCYPDYTITWSTKRITYPPSLGVGPLCEVVYPHLINYPILVDLTSFIQVRDPEIVIYSYSGEVEFTITNRGPKTMFAVALPLIPVDAKIYSITPNPDMNYTEYMGKFLPTYLKSQVQNAKFNLTQESVLFEYTDTLLSTMSSQQNLIQNSITTNEDIVDYPIWIVVLGENSSFDIKYKFQWEFTR
189		TRUE	PFDSM3638_02620	cell division protein FtsZ	44.0531	5.65786	1	57.2 (M.score:57.2)	2	5.63725	0.922909	189	MLEKLLEQAGIKLDFDGEEEKKSEIVDEFSGYKINIAVVGVGGSGNNTISRLYDLGVQGADLIAMNTDAQHLAITKAHKKVLLGKHITQGKGSGGDPKVGYLAAEASAQEIAAAVDGYDLVFITAGMGNGTGTGAAPVVARIVKETARNNGRFQEPLVVSVVTFPFKTEGTVRIEKAKWGIQRLLEYSDTVIIIQNDKLLELVPKLPLQSAFRFADELIARMVKGIVETIKLNSIVNIDFADVYSIMKGGGPALIGIGESDSNNRAVDAVNNALTNKMLDVEFGSGEKALVHFTIGPDVSLEEINKAMEVVYEKLSEKSEIKWGAMVDPEMGKTVRAMVIMTGVRSPYILGNVNALTDSSSWVVPKDRRLIGDPRIEKMFPDFNGSRAGRKRPSVGDAI…
190		TRUE	PFDSM3638_05990	rubrerythrin	21.315	5.22976	1	56.6 (M.score:56.6)	2	14.1304	1.26713	190	MNIEEEIVKKLENLSIKEILGYAIASEEDAEKFYSELATKLGGLLKEFFTQLSTAERGHKEILLRIYKSKFGDENYPVPEGIPFAETTIKVETVRNLIEAMKIALTNEKTAERVYKYLAEKMPEHREIFKFLATQERSHYESLRAHKEFLEDTVESKPEYIEAPPTYISSQLEIPFGPEYRGAR
191		TRUE	PFDSM3638_03975	glycosyltransferase family 2 protein	34.5909	9.68861	1	56.2 (M.score:56.2)	1	4.30464	0.981197	191	MYKGYKIGVAVPAYNEEKLIGETLKGIPPFVDRIYVVDDASKDNTSKVVEEMMRHDKRIVLIRHAKNKGVGGAIVSGWKKGLEEGMDILAVMAGDNQMDPRDLPALLDPIVEGKVDFTKGNRFLLSYDLKMSYWRRFGTFLLTILTKIASGYWHINDPQNGYVAIKADALRKIDLDKLDSGYFFENDLLIKASVANLRVVNVPVKIRYKIGEKSKIKYSKFIARTSWLLLRSFLWRIWVEYVKRRKFLGFLYLLGFTLIVTSFLIFLIYPTRLEIPLIVLLAGAAIFLGSCIKEKNLKQYLK
192		TRUE	PFDSM3638_07180	CO-induced hydrogenase subunit K	35.3647	9.47445	1	55.6 (M.score:55.6)	1	4.36137	0.526844	192	MKIVYGVIGLILIYIYVSVVSLLFSGIDRKLVARMQRRIGPPILQPFYDFLKLMSKETIIPKTANFMFKAAPILMLATVIALLAYTPLGFPPIFGTKGDIIVFIYLLTLADFFLVVGVMSSGSPYGRIGAARGIALLVSREPAMMLGVFAVMWAISKLGVEKPFSLSSLYEHTIWDFGPVAWVAGVVLIYVFMAWLASEIEVGFFNIPEAEQEIAEGTLVEYSGRYLGIIKLAESIKEFIAASLVVAVLFPWQLNIPGVQGYLINLLLHTLKVFIVLLVSKTIFRTITGRLKISQAVNLLWTRVFTASVIGALLLALGVML
193		TRUE	PFDSM3638_08135	septum site-determining protein MinD	27.4402	5.72334	1	55.2 (M.score:55.2)	2	8.49421	2.12867	193	MEGRSIVFASGKGGTGKTTTVANIGVALAQFGKEVILIDADITMANLSLILGMEDIPITLHDVLAGEAELKDAIYEGPAGVKVIPGGLSLEKVKKARPERLRELIKEISQMGDFILIDAPAGLELTSVTALLIGKELIIVTNPEISAITDSLKTKLVAEKLGTLPLGAILNRVTSEKTELSKEEIEAILEVPVIGIVPEDPEVKRASAYGVPLVIKNPTSPAAIAYKQIAAKLAGIKWTPPEPESPVKRIFKALFGGKR
194		TRUE	PFDSM3638_03085	hydrogenase nickel insertion protein HypA	15.753	4.99766	1	54.7 (M.score:54.7)	1	10.7914	0.375138	194	MHEWALADAIVRTVLDYAQKEGASRVKAVKVVLGELQDVGEDIVKFAMEELFRGTIAEGAEIIFEEEEAVFKCRNCGHVWKLKEVKDKLDERIREDIHFIPEVVHAFLSCPKCGSHDFEVVKGRGVYISGIMIEKEGEE
195		TRUE	PFDSM3638_01745	prefoldin subunit beta	13.3243	8.80239	1	54.7 (M.score:54.7)	2	15.3846	0.743252	195	MQNIPPQVQAMLGQLESYQQQLQLVIQQKQKVQADLNEAKKALEEIEKLTDDAVIYKTVGTLIVKTTKEKALQELKEKVETLEVRLNALNRQEQKINEKIKELTQKIQAALRPPTAG
196		TRUE	PFDSM3638_05965	rubrerythrin	20.6817	5.23574	1	54.4 (M.score:54.4)	1	5.17241	0.42184	196	MTIQEVREGLPIEKMADFSLEELLGMAIKAEIGAREFYKSLAEKIKIEALKEKINWLAEEEKKHEALLRKLYSQMFPGKEVVFPKEHIGPELQPVARELEKVQDIIDLIRWAMKAEEIAAEFYLKLEEMVKEEEKKRLMRYLADMERGHYYTLRAEYELLLNWEMYSQMMHIGP
197		TRUE	PFDSM3638_07495	glycine cleavage system protein H	15.1327	4.31577	1	53.4 (M.score:53.4)	1	11.194	0.548932	197	MIEVGEYKIKEGLYYTKEHEWVQVLEDGTVLVGITDYAQKELGDLAYVELPEVGKVVEKGDVLCEVESVKAVSEVYAPVSGEVIEVNEELADSPEKINEDPYEAWIAKIKPKNLEEELKELMDAKAYAEYLKTL
198		TRUE	PFDSM3638_04980	phenylalanine--tRNA ligase subunit beta	63.9232	4.88134	1	51.8 (M.score:51.8)	1	2.8777	0.87302	198	MPKFDVAKSDLERLVGREFSVEEWEDLVLYAKCELDDVWEEDGKIYFKLDSKDTNRPDLWSAEGVARQIRWALGLAKGLPKYEVEESDVVVYVDKKLRNIRPYGVYAVVEGLKLDEEALSQLIQLQEKVALTYGRRRREVAIGIFDFDKVKPPIYYRAAEKTEKFVPLGYSEEMTLEEILEKHEKGREYGHLIRDKPYYPLLVDSEGNVLSMPPIINSELTGRVTTETKNVFVDVTGWDLRKVMLALNVIVTALAERGGKIKRVKVIYPDFEITTPDLTPKEFEVSFEYIRKLSGLELSNEEIKELLERMMYEVEILSENKAKVKYPAFRDDIMHTRDVLEDVLIAYGYNNIDPEEPKLAVQGRGDPFKDFEDAIRDLMVGFGLQEVMTFNLTSKEVQF…
199		TRUE	PFDSM3638_01295	4-alpha-glucanotransferase	76.2611	5.4562	1	50.9 (M.score:50.9)	1	2.00308	1.03009	199	MGDKINFIFGIHNHQPLGNFGWVFEEAYEKCYWPFLETLEEYPNMKVAIHTSGPLIEWLQDNRPEYIDLLRSLVKRGQVEIVVAGFYEPVLASIPKEDRIEQIRLMKEWAKSIGFDARGVWLTERVWQPELVKTLKESGIDYVIVDDYHFMSAGLSKEELYWPYYTEDGGEVIAVFPIDEKLRYLIPFRPVDKVLEYLHSLIDGDESKVAVFHDDGEKFGIWPGTYEWVYEKGWLREFFDRISSDEKINLMLYTEYLEKYKPRGLVYLPIASYFEMSEWSLPAKQARLFVEFVNELKVKGIFEKYRVFVRGGIWKNFFYKYPESNYMHKRMLMVSKLVRNNPEARKYLLRAQCNDAYWHGLFGGVYLPHLRRAIWNNLIKANSYVSLGKVIRDIDYDGF…
200		TRUE	PFDSM3638_07155	cation:proton antiporter	54.9437	8.95492	1	50.3 (M.score:50.3)	1	2.94118	0.246122	200	MTWLPFIIIIPLLGAFSMPIVSLLKGKAKEIWASMISFATLIVGIQVFREVWSKGTIVYTLGAPNPFGKATFPIRIVWEVDKFGALMVLIVTFVSFLAVIYSIEYMKHDTGLEKFYTLILILELGMLGIAITGDIFNFYVFLEIMSIASYALVAFRNDTWEGIEAGIKYMFAGSLASSFVLLGIALLYGQYGTLTMGYLAVKIAENPTIVAKVALALFIGGLLFKSGAAPVHMWLADAHPAAPSSISAMLSGLVIKIGGIYAIARIVFSIFSPTINLGTIGWIIIIFACITLIVGNAMAVVQEDLKRLLAYSSVGQIGYILLGLGIGMVAYGTRVGEIALAGAIYHTVNHALMKALLFLVAGAVIHEIGTRNMNELSGLAKTMPKTTFAFLIGAAAIVG…
201		TRUE	PFDSM3638_10015	cell division protein FtsZ	39.9213	4.83413	1	49.7 (M.score:49.7)	1	3.49462	0.85349	201	MLKLVENVVGRVSEEENKVPEVQVPQSSIDEELKKIVEQIKARIYVVGVGGAGCNTVNRMMEVGVTGAKIIAVNTDAQDLLKVKAHQKILIGKELTRGLGAGNDPKIGEEAAKESERELRDALEGADMVFITCGLGGGTGTGAAPVIAEIARKMGALTVSVVTLPFTMEGIRRAKNAEYGLKRLVKYSDTVIVIPNDKLLEVAPKLPIQMAFKVADEILVQAVKGITELITKPGLVNLDFNDVRAVMKDGGVAMIGIGESDSEKRALEAAEQALNSPLLDVDISGATGALIHISGADVKLEEAQQIIEYVTRNVDPKAQVIWGIQLEPELEKTIRVMVVITGVTSRYITPEEETPLETPEESPSIEISIPEL
202		TRUE	PFDSM3638_00865	V-type ATP synthase subunit D	25.0099	9.64054	1	48.9 (M.score:48.9)	1	4.6729	0.698145	202	MPEILKVKPTRMELLKLKRRVKLAERGHKLLKEKQDALIMEFFTIYDEALSMRRELIKKIGEAFEALRLAQVEVGSVRLKEIAIGVNPNKEIEVRSRNIMGVRVPLIEVPELKRKPSERGYAFISTSSAVDVAAEKFEEVLELAIRLAEVEESLKRLGKEIEKTKRRVNALEYIIIPRMKNTIKFIEQHLDEMERENFFRLKRIKALLEARESM
203		TRUE	PFDSM3638_00530	PLP-dependent aminotransferase family protein	47.1409	6.12783	1	48.0 (M.score:48.0)	1	4.35835	1.14421	203	MEEILEKKLESGPLNFESYFSEKALKMKASEVRELLKLVETSDVISLAGGLPNPKTFPKDIIKGILEEIMEEHADKALQYGTTKGFTPLRLAIAEWLRKRYNIPTSKVDIMITSGSQQALDLIGRVFLNPGDLVVVEAPTYLAALQAFNFYEPQYIQVPLDDEGMRIDILEEKLRKLKAEGKRVKLVYTVPTFQNPAGVTMTEERRKHLLELASEYDFIIVEDDPYGELRYSGKPVPKIKALDTEGRVLYLGTFSKILAPGFRLGWIAGEPHFIRKLEIAKQSVDLCTNSFGQVVAWRYLEGGHLEKHIPRIIEFYKPRRNAMLEALEQYMPEGVKWTRPEGGMFIWVILPEKINATTMLEKAVKKGVAYVPGEAFFAYRDVKNTMRLNFTYVDEDKIQ…
204		TRUE	PFDSM3638_01775	50S ribosomal protein L18a	9.32116	9.73283	1	47.8 (M.score:47.8)	1	16.8831	0.395067	204	MKVKVFRVHGYFEKNGRKFKFTKEYRGIKEEDVKELVYSDIGSKHKVKRNKIFIKEIKEIRPEEAEDIVVRRLSLEL
205		TRUE	PFDSM3638_07280	radical SAM protein	68.6769	6.33099	1	47.1 (M.score:47.1)	1	2.04082	2.19223	205	MAENLSAGEVPSGEKEFEALTKRMREIIEFPEISEEEFEEMLKNANRGYGEPLPHRTYSLCPESRRVVPAVVWEKDGMVWITKKCPEGIITDLYSEDVDLYYRFLRWKFEDKKLFSVNVPNTGINCPFDCGLCARHRSHTNLLNIVLTNRCNLSCWYCFFYAREGEPVYEPTLEQIRMMLRNAKKENPIGANAVQFTGGEPTLRDDLIEIIKIAKEEGYDHVQLNTDGIRLAFEPELVKKIREAGVNTLYLSYDGMTPQTNWKNHWEIPLIFENVRKAGGPGIVLVPTLIRNVNDHEAGAIINFGLNHLDIVRGVNFQPISLVGRVPKKERQRFRITIAGAIKKIEEQTNGAISRDDWYPIPIAGYIARFFEAFTGKHYYMTSHYACGAATYVFLDKEE…
206		TRUE	PFDSM3638_03395	tRNA (guanine-N2)-dimethyltransferase	44.3992	9.62142	1	45.1 (M.score:45.1)	1	3.66492	1.5082	206	MGRFKKVPSSLCPMKKPGDVLREILQEKGIKSVGTLSRKWPSGRDIYQELALLLLEGDGAIVELREETAESWDLNGKKVGPSKYAYVRPCFVEKFKVIVDGSEIAKRLPDYPWIIVDLTFWNRHIPKEKDKVALQLRETYAVVRRMYYPRRFAITWVNEEFKKKNKVPLEKVVSYEGSTADFLREKGINRVVLLDPNAEEVLSREDLQERAFIIGGIVDMKGDKKGTTAKIGEVLEKEGIDVLRRKIVLRGDIVGVPDRINHIAEILLRMLYGEDMEKAILAVQAPTHARWRLRKEIPKRKIRYLIDGKLYLVVEKELYDELKQWLNIRWEDFVKVLRETGMVALERRRIHHLNKISVFRFDKSGGKRVILLKRAALLCYNC
207		TRUE	PFDSM3638_01695	hypothetical protein	29.4489	5.34982	1	43.9 (M.score:43.9)	1	5.68182	0.418903	207	MFIKKDNKVELIQGIPHGSHLDTVLGYAERLSEILSMKGEQVGSVVFEKGRIIKKKLKLKIYDVPLGVITFRVVTDEKNVLLTTYPMLEDLVEVEARILKVLEWKEWPEGDIVCEVSNEYGPQITFFAVDYLMKKDEYVRRENAKVGVGLLLYFLKVGVDARKEVQGPGGENIVIDLSEAEVLLPGTLNGGFIDDYIFTGHVKEFREVNVLGKDGYLLKISIEPLGLVPAFVLKERVKGEIEKDAAVYGMGWLQGKVIGAPAGI
208		TRUE	PFDSM3638_00030	RNA-binding protein	53.6377	5.84916	1	43.6 (M.score:43.6)	1	2.34542	2.5031	208	MSTESEIAVRIRGIYSTALTKLLMDRGFKIVQPSDVIAERFGIEKSYEDFDVDIYDKNHGVTIVGTKVEAVKKVFEEEFIDVFFRKLPYKLHGIYKGLVVKRDDRFVYVDIGNVIGTVLIEELPDAAEGDEVVVQVKKHNVLPHLSTLITIPGDYAVLIPKPIGVQRHVKISRKIKDPEERERLRILGLSVDLGEWGVLWRTAAAYKDWNTLRDELVRLSKIADKLKEAEKFSAPAEIIEGREIYEIEFGGGVKKKLDEIRNEVVPTIEGHHQFKSYDPEFTLAVDVAEGILAKLPSQRQKISKGFLEAIITSKGPKVGWIFTLNHVKPDGQIIKIGPGEVIEVSTDPLKVTIKRYLRPGKFYDGLEVPIESGDYAITEIEAGKWWFVHRYYDKDGNLK…
209		TRUE	PFDSM3638_01225	hypothetical protein	32.3903	7.11733	1	42.6 (M.score:42.6)	1	4.62633	0.148061	209	MFKIDRLRFGTAGIPLSTPKPSTIAGIERVRELGLDAMELEFVRGVNIRPELAKKIKYVAKKNDVVLTAHAPYYINLNAKEKEKVESSKRRIIQSAERLYEAGGWSVVFHAGYYLKEHPEKVYQKIESTLKDIERELKDRGIEVWLRPELTGKPTQFGDLKELIKLSQNLELVLPAIDFAHAHARNKGKCNSEEEWREMLALIENELGREALDNMHIHISGIEYTEKGEKRHLNLEESDLKWEDLLKVLKEFKVKGVVISESPNIEGDALLMKKKWEELKI
210		TRUE	PFDSM3638_02740	hypothetical protein	48.8713	6.91856	1	42.2 (M.score:42.2)	1	2.09302	0.449652	210	MVIDEILELVPSIPDPFVRVLTYGRIGVYLSKIKDPRAGKAFRKAFEELSKIEDPYILVRALLAIGYSTSLAGLKSAKKAFREAISSAQLLPEEIQDIVKAEAIDYLLSLKDTDEAVFYAVEIKNKKLRNKKLLEILEKVLENLEGEKLNKIYKRRKVLLILETIEEPYREEAIVKSIKPLLSLGEYKLVLELINSIGSKLWIAQALNEVLEFLKNNEENSEIVKILIEESEELAKKVGEDIREDIAYIFAIHGFIQQSIEVLKTIPPTTQRIIVREILTSLLSKEDLDKLKILMESLPPDMVLMVKDIIFRILERGSPKMEPMIQVLLEKEGISEDILVGITKYYLELNNLQQAVRVIKRINSERHRSVALGFLAHYLIRIGRVGDAIDVVLNIKDRG…
211		TRUE	PFDSM3638_09415	50S ribosomal protein L35ae	9.72948	10.6203	1	41.7 (M.score:41.7)	1	16.092	1.31532	211	MRIKGVVLSYRRSKENQHNNVMIIKPLDVNSREEASKLIGRLVLWKSPSGKILKGKIVRVHGTKGAVRARFEKGLPGQALGDYVEIV
212		TRUE	PFDSM3638_06425	tRNA 4-thiouridine(8) synthase ThiI	40.7071	8.5956	1	41.7 (M.score:41.7)	1	4.13223	1.27941	212	MIIVRYGEIAIKRGKRKEFEKKLADNIEKILKRKGIPGKTKISRGRILVDAPNEATNIIAKTPGVVSVSPAEVMEYEEIPNYLKKTLMGFNPKSFKVETQRLDKTFLKTSLEINKEIGEFVVKEFGWKVDLENPELVIGIEIIDGKAYVFFEKIKGVGGLPVGTQGKVVALISGGIDSPVAAFLMLKRGAEVIALHFDQGTNAKKVVEKVVEILSDYSPEPIELIVENHFEILKPYVSVLAKLQKREWTCILCKIAMLKRAAEIAKEEGALGIVTGDSLGQVASQTLSNLFIETISVDYPIYRPLIGFDKEEIVSIAKRIGTYDAFLEYPYCECPFRPNRVITQGKITEFYFIRDELRKEGLL
213		TRUE	PFDSM3638_06235	ABC transporter ATP-binding protein	35.198	5.50982	1	41.6 (M.score:41.6)	1	4.22078	1.81609	213	MYVIEIENLTKSYGKFKAVDSLTLNVKEGIAFGFLGPNGAGKTTTILSMLGLIVPNSGSIKIFGYDIFKEPIKAKERLGFLPENATLYEELTAWRNLEFFANFYKMSRQEKEKRIEELLKLVGLWDVRFRRVKTFSKGMKQRLLLAQALINDPDLLILDEPTSGLDPEGAYLVKSIIREQKKAGKTIFFSSHVLSEVEELADEVGIIVKGKLRTVGTLEEIKKQFMELEGYEIKVETKQPIPEIVHPEIIRIEKLSENKAIIFAKSDIREDISEELQKRNITILSLEVEEPSLEDVFLRTIYKRGDEE
214		TRUE	PFDSM3638_02840	hypothetical protein	17.146	9.72065	1	41.4 (M.score:41.4)	1	7.74648	0.3927	214	MGMKYLIKLKYIKPAQLAVNREQKLAEFYPIFEDGTLGRVEAKARVFLPEYSDFAKGLGFEVKKRRMITEDDYAYLRAMVYGVVMGVLRNPGDWRRLEERVLEMEPIELRYWASKFRNAYWKYKNMRKLMFLARRFMEVEMI
215		TRUE	PFDSM3638_01895	RNA ligase	43.6851	5.77493	1	40.7 (M.score:40.7)	1	2.90237	1.88689	215	MVSSKFKELLYTLGIPEDKVEILEARGGIMEDEFEGIRYLRFKNSVGKLRRGTVLFEDGTTVFGFPHIKRIVNLSAGVRKIFKSSEFYVEEKVDGYNVRVVKFKDRILGITRGGFICPYTTERIAEFVPEEFFKDHKDLVLVGEMAGPESPYLVEGPPYVKEDIQFFLFDIQDIKTGSSLPVEERLKLAEEYGINHVEVFGRYSYKDIDDLYELIERLSREGREGIVMKSPDMKKIVKYVTPYANINDIKIGARVFYELPGGYFTSRISRLAFYIAEKKIRGEELHNLALQLGKALLQPLVEAIHDVTQGDVIAERFRVRVRKIETAYKMVTHFEKLGLEIEIEDIEEIEGGWRVTFKRVYPEATREIRDLIGGKAFVD
216		TRUE	PFDSM3638_05970	rubrerythrin	38.7778	4.9387	1	40.5 (M.score:40.5)	1	4.05797	0.0913704	216	MLSINPTLINRDKPYTKEELMEILRLAIIAELDAINLYEQMARYSEDENVRKILLDVAREEKAHVGEFMALLLNLDPEQVTELKGGFEEVKELTGIEAHINDNKKEESNVEYFEKLRSALLDGVNKGRSLLKHLPVTRIEGQSFRVDIIKFEDGVRVVKQEYKPIPLLKKKFYVGIRELNDGTYDVSIATKAGELLVKDEESLVIREILSTEGIKKMKLSSWDNPEEALNDLMNALQEASNASAGPFGLIINPKRYAKLLKIYEKSGKMLVEVLKEIFRGGIIVTLNIDENKVIIFANTPAVLDVVVGQDVTLQELGPEGDDVAFLVSEAIGIRIKNPEAIVVLE
217		TRUE	PFDSM3638_02810	hypothetical protein	33.8936	9.57336	1	40.3 (M.score:40.3)	1	4.66667	0.865334	217	MKVVGIKGSVSYLQALKYLKTKKVTKRLKEIEKLVDTLITLAPYAPEGSKIETIRKNYAKISFNKIKTVSRSKIGSPRIKSIMLLLWNFGLLDVKIIENSWYVRKTKLASLLEENFKDLSPSEKLKVYLLGGLLVDTPARFVYRCTLNGVEDYKGVKKAILGYLSDQRSNSLIIGLSNMLESIKFIEEAQAYSGKKEYIGLVDVAFYGLSGLYLDVKRESGKLTVKPNFRELRALYEIDKSVATGSDYGLSISKEILENLANTKRRKTIFSEEVQELLVNVIKENAISISQDLQNMYGII
218		TRUE	PFDSM3638_04860	pyruvate ferredoxin oxidoreductase	12.0037	5.199	1	39.6 (M.score:39.6)	1	16.1905	0.759777	218	MAESPFKADIERAQKELSEKMTPGAIVYIPGSSVINKTGSWRVFKPEFNRDKCVRCYLCYIYCPEPAIYLDEEGYPVFDYDYCKGCGICANECPTKAIEMVREVK
219		TRUE	PFDSM3638_08085	glutamate dehydrogenase	47.0842	5.45321	1	39.5 (M.score:39.5)	1	5	0.605509	219	MVEQDPYEIVIKQLERAAQYMEISEEALEFLKRPQRIVEVTIPVEMDDGSVKVFTGFRVQHNWARGPTKGGIRWHPEETLSTVKALAAWMTWKTAVMDLPYGGGKGGIIVDPKKLSDREKERLARGYIRAIYDVISPYEDIPAPDVYTNPQIMAWMMDEYETISRRKTPAFGIITGKPLSIGGSLGRIEATARGASYTIREAAKVLGWDTLKGKTIAIQGYGNAGYYLAKIMSEDFGMKVVAVSDSKGGIYNPDGLNADEVLKWKNEHGSVKDFPGATNITNEELLELEVDVLAPAAIEEVITKKNADNIKAKIVAEVANGPVTPEADEILFEKGILQIPDFLCNAGGVTVSYFEWVQNITGYYWTIEEVRERLDKKMTKAFYDVYNIAKEKNIHMRDA…
220		TRUE	PFDSM3638_07200	CGP-CTERM sorting domain-containing protein	69.8826	4.87055	1	38.8 (M.score:38.8)	1	1.57729	12.3485	220	MRGKILSFLIVLTLLALPTTAQCPSLGRTVVLKAPAVSMTSTGEMIGVPTEFVITVAPGSGHVYVETWPLTEVDMQASARLAAEIAGVVTGKDMSKYDVFIQVRADSPIIGGPSAGGTMTVGIIAALMGWDVRSDVMMTGMINPDGSIGPVGGILEKASAAHQAGAKIFLIPKGQRIQVVTETQKKQIGPITQITTTQRKVDVVEYAQERWGLKVIEISDIYEAVYYFTGHKLEKPQPPQNVVISTSFLEGEAKSDYEETLQYYNTISNKLKNSEVGYTTYSYLKAALDNAKSTLDNAKNALDSGKYYTAMSLSFQARIVIRHVDWYIDLYEGKDIEDIFSEVKDEIDRIESYISNLTIRGVTMLQAVAAAETRIEEAKEYLKEAQISYYNQDYWNAIG…
221		TRUE	PFDSM3638_02710	type II methionyl aminopeptidase	32.8216	6.63155	1	38.8 (M.score:38.8)	1	3.72881	1.78787	221	MDTEKLMKAGEIAKKVREKAIKLARPGMLLLELAESIEKMIMELGGKPAFPVNLSINEIAAHYTPYKGDTTVLKEGDYLKIDVGVHIDGFIADTAVTVRVGMEEDELMEAAKEALNAAISVARAGVEIKELGKAIENEIRKRGFKPIVNLSGHKIERYKLHAGISIPNIYRPHDNYVLKEGDVFAIEPFATIGAGQVIEVPPTLIYMYVRDVPVRVAQARFLLAKIKREYGTLPFAYRWLQNDMPEGQLKLALKTLEKAGAIYGYPVLKEIRNGIVAQFEHTIIVEKDSVIVTTE
222		TRUE	PFDSM3638_05630	type I-B CRISPR-associated protein Cas8b1/Cst1	51.4549	6.59983	1	38.2 (M.score:38.2)	1	3.37079	0.472574	222	MFSWTGHPFVDGGLAALLLYSEKTRPEELTQEDIEKAIKFASELYARKDWSSSYLHALLFPNSGLLMANPSMAKKRTPENIAKNLESLLNEKEDPNAPICEICGRRHSRSKPVYRSEFPLIGSGGVPNYFPSGKEGANICSHCLFLVQFLPLILYRLRRLLLIHTYPPELMLELHREALKDVRLTKLVSSGRGYQRPENFLFTLLTEVTIKTEREELWENASITLYYFTNPNRERPKMMIIHVPSSVTRFVAHAARHDLSGWKRIVAMGWKKGSDEKSSPNEVYLKLLNGESILPYFINVAKRRTNASWDLLSFYCTEVLGLDEKALEFIKEVGDRIVETLKELPDNKLSARVRELERAEKLYQFEAFFVNLEKLRQRLGLKDPLLTFDEFARVLTIYG…
223		TRUE	PFDSM3638_10155	DUF63 domain-containing protein	30.6957	9.39616	1	38.0 (M.score:38.0)	1	3.74532	0.264506	223	MIREFFQKYFIDPIKYNTGYNPVNTLVYAIILGIATLLVYKVLKRLKIEINNAFFRALIPYMIFGAFTRALTDAGVFPRTYLTVSPGIYFLVFVIAFSALLVSHKFAKDWRGVFLWFGWGLVMVDLAAMSANISKINFDFAVLKYFIPFLILAELVVFLLSKKVSLVRENSYLFYAHFYDATTTFVGVDFMGYWEQHVLPRLLIGLTGTAAVMYVLKFIILFAAVWLLKELEKEGEEKELLDFIKMVIFILGFAPGTRNLLRMLMGV
224		TRUE	PFDSM3638_05720	ribosome biogenesis protein	7.2188	10.1057	1	37.9 (M.score:37.9)	1	18.3333	0.184718	224	MRFRIRKCPKCGRYTLKEVCPVCGEKTKVAHPPRFSPEDPYGEYRRRWKREVLGIGRKEK
225		TRUE	PFDSM3638_03940	glycosyltransferase family 4 protein	44.9511	9.18467	1	37.7 (M.score:37.7)	1	4.37018	3.48925	225	MRVLVMVNDFPNKDNSYTANIFVKEQVKALSEFVEEINVIVPIPRGIELYRKTSYRDYAIGENVHVHFVKYINPLFPIAYSKLRREWIWLEHRALTNFIKKKDIKFDIIHAHYTWPSGAVGVKLKEEYKVPLVITEHTSQTFNRYITTRDPLAREIWQKADIIVRVRKGDIDLFSRVGITPSKIRYIPNGFDGNKFYPIPQEIARRKLNLVEYEKIIINVANMYSRVKGHEYLLRAFSKVAENTSDAFLILVGSGKLLSHLKKLADNLYLGHRVLFAGSKPHDEIPLWMNAADLFVLPSLRESFGVVQIEAMACGVPVVATRNGGSEEIIISEDYGLLCEPANPKELAEKILIALEKEWDREKIRKYAEQFTWENIAKKTLEVYRGVLK
226		TRUE	PFDSM3638_07720	nodulation protein NfeD	48.3952	7.69817	1	37.7 (M.score:37.7)	1	2.69663	1.07049	226	MKKAIMILTIFTLLLFAQGVKGRDSNVVYVAQITGQITSYTFDQFDRYISIAERNNARAIIIELDTPGGRGDAMMEIIQRIQQAKVPVIIYVYPPGASAASAGTYIALGAHLIAMAPGTSIGACRPILGYSQNGSIVEAPPKIVNHYIAYIKSLAEESGRNATIAEKFITEDLSLTPEEALKYGVIEVIARDVDDLLEKANGMTTKIPVNGRYIKLNFTNVEVRYLEPSLKDKLITYITDPNISYILLTLGIWALILGFLTPGWHVPETIGAIMIILAILGFGYFGYNAAGLLLIIVGMLFFVAEALTPTFGLFTVAGLISFILGGILLFGGGNVEYLVSKDVFSQLRLIIIILGVIIALFFAFGMAAVIRAHRRKAATGKEEMIGSEGTVVEELNPEG…
227		TRUE	PFDSM3638_09065	50S ribosomal protein L15	16.3899	10.59	1	37.6 (M.score:37.6)	1	7.48299	0.148961	227	MIRRRKKVRKLRGSHTHGWGCKKKHRGGGSKGGRGMAGTGKRNKSKWTWTIKYAPDHLGKRGFSRPPEVQREVRVVNLKFIDEHLDELMQMGIAYEEGGKIIVDVTQFADKVLGTGKLTRPLVIKARAFSPKAEEKIKAAGGEAVLV
228		TRUE	PFDSM3638_03110	hypothetical protein	12.6387	9.97732	1	37.2 (M.score:37.2)	1	13.8889	1.77677	228	MPRWGRGRRRKMRMIEFIPYARHFYPALPRFGPPKPPIIMTYEEFEALRLVDYEGLTQEEAGKRMGVSRGTIWRALTSARKKVAQMLVEGRELIILPQGNEVIKSDEE
229		TRUE	PFDSM3638_09560	hypothetical protein	22.0616	5.13074	1	37.1 (M.score:37.1)	1	4.52261	0.226447	229	MKSAKTIFILGIIAIILSSGCINTKVTTQTAIGEKVERVCLTNEVVGSFEVPQEIREEVEKLFSEASVKGFTVNVILDNSTLSLTFYEFRPSFLPQDFEVAVDGRQLKNTMYLLADEVSVAIAYNNQTFRGKVRIIPKERGEFTYKAKLDEISGEVLLGSFGTKTPEFQVYARKISENTVEVMVKKDDEIVASGVISLG
230		TRUE	PFDSM3638_07165	hydrogenase	18.2905	5.95084	1	36.8 (M.score:36.8)	1	5.98802	0.274531	230	MTNNSERKRLEKRIAQLCKFIGRSPWVFHVNSGSCNGCDIEIIAALTPRYDAERFGVKLVGSPRHADILLVTGPVTNQSLERVKLVYEQTPDPKIVIAIGACPTGGSVFYESPFTNAPLDRIIPVDVFVPGCPPRPEAILHGVVLALEKLAKMIKGEVPPEEGEENE
231		TRUE	PFDSM3638_05335	hypothetical protein	10.1233	9.98362	1	36.8 (M.score:36.8)	1	8.88889	0.0579191	231	MDVLEMQGGDMRRNRRRFDGERKGRRFENSAPVKVGERYKVKIESMGKGGDGIARIKGFVIFVPNTHVGDEVEIVINSVKSKYAFAQVIG
232		TRUE	PFDSM3638_00915	ABC transporter ATP-binding protein	38.2962	7.64701	1	36.7 (M.score:36.7)	1	3.8806	0.503768	232	MAEPILKVENLKKYFPVRRGLLGALRGEPQRFVRAVDGVSFEVYKQQVFALVGESGCGKTTTGKLVMKLLEPTDGKIYLEGQDVTELRTKEEIKAYRRRVQMIFQDPFSSMNPRFRIYDILEEPLLIHGIGETRAEREELIYKALEMVKITPPEDYVNRFPHMLSGGQRQRVAIARALILNPTFIVADEPVSMLDVSIRAEILELMKELKEKMGVTYLYITHDLSTARYFADWIAVMYLGRIVEMGPAKEVIDNPLHPYTRALLAAVPEPIPERKDVIKEIPIKGEVPSAVNVPPGCRFHPRCVYFKEGLCDKKEPQLVEYSHNHWVECHLAGKI
233		TRUE	PFDSM3638_00880	radical SAM protein	34.503	6.21873	1	36.6 (M.score:36.6)	1	4.96689	0.233379	233	MKKYTWEEFAKLMGIEPQKLENKEARVLKKFVEEITWPTHCNYCEGLDLSNPNPVHHPSYELTPACNHDCIFCYSNVAVKLGRAPSPGYYGWENPKAITVSQYGEPLLSPRIIEVNRILRERFPEARLDLQTNGSLLTRELWEKLDFDLVMISLNAADKEKHKRIANADTFEQVVNALKIVGEDDSVRSVVRTIFMPGINDEDIPKIAELAASLGIDEMHLQPLTIHELNVERLKKAGLDFERAESIRELLKAAMEAKKYIDVRISGCILVQLKQMDPITLYSVRRVAREVAPLVKRSKLDI
234		TRUE	PFDSM3638_02200	MFS transporter	49.4009	9.47594	1	36.5 (M.score:36.5)	1	2.7088	1.60357	234	MGNIRRRVSIVLLILMAAFLMADQNLLPPNYQQIMKEFGIGETQMGLVSSIFVATSALITIIWGMLADIKQRKKLLVIGVLLGEIPCFLTAYVQTYWQLLAMRFLTGIGIGSIIPIGYSLIADMFEEEKRGRGYSYIETAFGFGTLFGMIIAGMIASWRTPFIIAAVPNFILAPLFYIIAEEPKRGAGEKEIRALIEKGYEYTYRLNLEAIRKSFQTKTNILIFLQGIIGTVPWGILLYWLVSFLQVTRGMDKSTATFVLLIIGIASVFGSLLGGFVGDYFEAKRRGGRATITGIAIFLGMLASIGLILYPLPSKLSTVHWIGLAIYSILFIQFVSYAGPNVRAIVSQVNLPEDRGTVFGLFNILDNVGKAIGPLFGGFLIETLKSMGYMEPLAYQYTL…
235		TRUE	PFDSM3638_07215	NADH-quinone oxidoreductase subunit NuoI	24.6926	8.64068	1	35.9 (M.score:35.9)	1	5.28846	0.0520968	235	MEEVTFRIAPEEKVKKKPSFLKPWFGLKYLFKKPVTIKIPYEFIEPAPRYRGFHTLDWKKCIGCNMCGQICPARAIEMTWIEGEKRPHPKIDYGRCTFCQFCVDVCPTGALGFIETYMLTTTWREEELLLYDWVPIEPEKFKEIQEKFKDYKFPVEKIEFNKETKEVTYYLRDGTTFKFKILGYGLKPPVKPQPTTKQQEEEKKESGQ
236		TRUE	PFDSM3638_07015	peptidylprolyl isomerase	29.0426	5.02767	1	35.7 (M.score:35.7)	1	5.81395	1.30281	236	MKVEKGDVIRLHYTGKVKETGEIFDTTYEDVAKEARIYNPNGIYGPVPIAVGAGHVLPGLDKRLIGLEVKKKYVIEVPPEEGFGLRDPGKIKIIPLGKFRKSGIIPYPGLEIEVETENGRKMRGRVLTVSGGRVRVDFNHPLAGKTLVYEVEVVEKIEDPIEKIKALIELRLPMIDKDKVIIEISEKDVKLNFKDVDIDPKTLILGEILLESDLKFIGYEKVEFEPTIEELLKPKSAEEQESPNEEQQEESESKAEES
237		TRUE	PFDSM3638_05195	orotate phosphoribosyltransferase	20.086	5.44776	1	35.5 (M.score:35.5)	1	8.79121	0.00218826	237	MKEELIRMILEEECIKFGHFILTSGKESSYYIDIKKLITNPKALRLIARLIKEKAEEEGIQFDKVAGPELGAVPIATALALETDRPLLIVRKKKKEHGTGRQIEGEVKEGDRVLLVEDVTTTGGSVLRAAKILKEAGAEITGIFVVVDREEGAKEAIEKEGFKLYPLVLVHELFEAAGVSSE
238		TRUE	PFDSM3638_09385	S-adenosylmethionine synthetase	44.2534	5.47201	1	35.4 (M.score:35.4)	1	4.48878	0.504531	238	MARNIVVEEIVRTPVEMQQVELVERKGIGHPDSIADGIAEAVSRALCREYIRRYGVILHHNTDQVEVVGGRAYPRFGGGEVVKPIYILLSGRAVELVDQELFPVHEVAIKAAKNYLKNAIRHLDVENHVIIDSRIGQGSVDLVSVFNKARENPIPLANDTSFGVGYAPLSETERLVLETEKLLNSEKFKKEYPAVGEDIKVMGLRRGNEIDLTIAAAIVDSEVATPKEYLEVKDKIKEAVEELAKEITSRKVNIYVNTADDPERGIYYITVTGTSAEAGDDGSVGRGNRVNGLITPNRHMSMEAAAGKNPVSHVGKIYNILAMLIAEDIAKTLPVEEVYVRILSQIGKPIDQPLVASIQVIPKPGHSVKEFEKDAYSIADEWLANITKVQKMILEDKIS…
239		TRUE	PFDSM3638_02745	GTPase	50.7244	5.97445	1	35.3 (M.score:35.3)	1	3.34821	0.907678	239	MAEKKRRRVVILGAAGRDFHNFNVFFRDNPDYEVVAFTATQIPDIEGRIYPPELAGELYPNGIPILPEDDLEKIIKEHDVDIVVFAYSDVSHEHVMHLASRAHSAGADFWLLGPKSTMLKSSKPVVAVTAVRTGCGKSQTSRKVAQILQEMGFKVVAVRHPMPYGDLRKQVVQRFATFEDLDRYECTIEEREEYEPYLERGMVVYAGVDYEKILREAEKEADIILWDGGNNDFPFFEPDLWIVVTDPHRPGHELTHHPGETNFRSADVIIINKIDTAPPENIQKIRENIEKINPNAIVIEAASPIFVDKPELIKGKRVLVVEDGPTLTHGGMSFGAGYIAAKKFGAKEIVDPRPYAVGSIIETYKKYPHLSNILPAMGYGKKQIKELEETINRADADVV…
240		TRUE	PFDSM3638_04465	sulfhydrogenase 1 subunit delta	29.2146	5.16781	1	35.1 (M.score:35.1)	1	3.83142	2.98351	240	MGKVRIGFYALTSCYGCQLQLAMMDELLQLIPNAEIVCWFMIDRDSIEDEKVDIAFIEGSVSTEEEVELVKKIRENAKIVVAVGACAVQGGVQSWSEKPLEELWKKVYGDAKVKFQPKKAEPVSKYIKVDYNIYGCPPEKKDFLYALGTFLIGSWPEDIDYPVCLECRLNGHPCILLEKGEPCLGPVTRAGCNARCPGFGVACIGCRGAIGYDVAWFDSLAKVFKEKGMTKEEIIERMKMFNGHDERVEKMVEKIFSGGEQ
241		TRUE	PFDSM3638_07715	NADH oxidase	48.0409	6.07378	1	34.8 (M.score:34.8)	1	2.51142	1.32002	241	MRIVVIGSGTAGSNFALFMRKLDRKAEITVIGKEETMQYSPCALPHVISGVIEKPEDVIVFPNEFYEKQRIKLLLNTEAKKIDRERKVVVTDKGEIPYDKLVIATGSKAFVPPIKGVENEGVFTLKSLEDVRKIKEFIKKRNPKNAVVIGAGLIGLEGAEAFAKLGMKVTVVELLEHLLPTMLDKDIAKIVEENMRKYGVDFKFGVGVDEIIGDPVEKVKVGEEEIDADIVLVATGVRANVELAKEAGLEVNRGIVVNEYLQTSDPDIYAIGDCAEVIDAVTGKRTLSQLGTSAVRMAKVAAENIAGRNVKFRPVFNTAITEIFDLEIGAFGITEERAKKEEIEVVVGKFRGSTKPEYYPGGKPIVVKLIFRKEDRRLIGAQIVGGERVWGRIMTLSAL…
242		TRUE	PFDSM3638_01715	hypothetical protein	33.8378	6.49099	1	34.8 (M.score:34.8)	1	3.31126	15.6455	242	MATTNEVKTYVCDIKTILFIGSLLALLSYLPGTGRVLSIIGGIVYLYGLYRWKELVDERPFKLALLIFVISIFQVVAVLILLRAERIALSITSFSKLIFVYTILNYPFVALIAILRRIILENFYEVTGEENFLTSRELLLYAILLYPVIVGSIIGIVANVYELLGYKNMPEAVTPVRGRKIEINKRETIALLGASFLISGLLIYALVPKYDFEIEKGNVVFYGEISGDFIDGIIIYKEPCPGSKICIEKVEVDGEIVYSAPSYEKVNNKQVVRISIPKSAEKIRVLLAKEGEVIIEVPTKES
243		TRUE	PFDSM3638_06460	TATA-box-binding protein	21.2983	5.03141	1	34.6 (M.score:34.6)	1	5.2356	1.91665	243	MVDMSKVKLRIENIVASVDLFAQLDLEKVLDLCPNSKYNPEEFPGIICHLDDPKVALLIFSSGKLVVTGAKSVQDIERAVAKLAQKLKSIGVKFKRAPQIDVQNMVFSGDIGREFNLDVVALTLPNCEYEPEQFPGVIYRVKEPKSVILLFSSGKIVCSGAKSEADAWEAVRKLLRELDKYGLLEEEEEEL
244		TRUE	PFDSM3638_04455	hydrogenase	43.3704	6.29926	1	34.2 (M.score:34.2)	1	3.81471	0.440842	244	MRYVKLPKENTYEFLERLKDWGKLYAPVKISDKFYDFREIDDVRKIEFHYNRTIMPPKKFFFKPREKLFEFDISKPEYREVIEEVEPFIIFGVHACDIYGLKILDTVYLDEFPDKYYKVRREKGIIIGISCMPDEYCFCNLRETDFADDGFDLFFHELPDGWLVRVGTPTGHRLVDKNIKLFEEVTDKDICAFRDFEKRRQQAFKYHEDWGNLRYLLELEMEHPMWDEEADKCLACGICNTTCPTCRCYEVQDIVNLDGVTGYRERRWDSCQFRSHGLVAGGHNFRPTKKDRFRNRYLCKNAYNEKLGLSYCVGCGRCTAFCPANISFVGNLRRILGLEENKCPPTVSEEIPKRGFAYSSNIRGDGV
245		TRUE	PFDSM3638_07700	pyridoxal 5'-phosphate synthase lyase subunitPdxS	36.8763	5.76254	1	34.1 (M.score:34.1)	1	2.98507	1.76434	245	MDKMKIIMEKGTERLKRGFAKMVKGGVIMDVTNAEQARIAEEAGAVAVMALHKVPADIRKAGGVARMAPVEKIQEIMDAVTIPVMAKVRIGHEAEARILEALGVDMIDESEVLTPADPFFHIYKKKFTVPFVCGARNLGEAVRRIWEGAAMIRTKGEAGTGNIIEAVRHVRLVNENIRLIQRMTDEEIYGVAEKFAEPYLRLAFSVKEISGLPKRVLENEPIYEGFTYREIVDGLYKILLEIKKLGRLPVVNFAAGGVATPADAALMMAMGMDGVFVGSGIFKSSNPPAMARAIVEAVNHWDEPDVLAEISREIGEPMRGQDIAELEVRMEERGV
246		TRUE	PFDSM3638_02965	mannosyl-3-phosphoglycerate synthase	45.3966	6.15112	1	33.7 (M.score:33.7)	1	4.56853	2.35826	246	MLLEAPVYKEIFGAVKIYELQKVIKLDTETEDVPVYTITNIPREKIYDTLGKMAVIVPMKNEKLHLVDGVLKAIPHKCPIIIVSNSKREGPNRYRLEVDLVRHFYNLTNSKIIMVHQRDPGLAKAFQKVGYTDILDEKGNIRSGKGEGMLIGILLAKAIGAEYVGFVDADNYIPGAVNEYVKDYAAGFLMSESDYTMVRLHWRHKPKVTKGTLYFKKWGRVSEITNHYLNMLISEQTSFETTIMVTGNAGEHAMTMKLAEIMPFSTNYSIEPYEIVYLLERFGKWENVEEFKDVFDQGIEIFQIETLNPHFHEDKGQEHVREMILLSLATIYHSKMASKNLKRRILNDLIEHGILKEGEEPPKLRIMRPINEIDIEEWMKVVENNSETLLRFGL
247		TRUE	PFDSM3638_09150	30S ribosomal protein S3	23.4148	9.56705	1	33.7 (M.score:33.7)	1	6.66667	1.56767	247	MAIERYFIREAVREMLIDEFLEKELRRAGYGGLDIKKTPLGTKVIIFAANPGYVIGRGGRRIRELTRILEKQFGLENPQIEVEEIKNPYLNAKVQAVRLAQALERGIHFRRAAYAALRAIMNNGARGVEIRLSGKLTGERAKSIRFYQGYLAKVGNPAETLVSKGYAQALLKLGVIGVKVAIMPPGARLPDEIEIIEKPVEEEVVSNEAE
248		TRUE	PFDSM3638_07255	cation:proton antiporter	25.6517	6.51983	1	33.5 (M.score:33.5)	1	5.10638	0.921916	248	MLKRVLAILTILVIGYWLAQGLADVPFGQDKMVVGKYYLEHVKEETGAVNAVTAVVVNYRGLDTLGEVTVLFIASTGVAALLWKKKRERTAKTEGSVVLTTGARLLFPFIALFGMYIFIHGHLTPGGGFPGGATIATAFLLMYLAFTIYEIPHRGFEVTEGLAGMGYVITGLIGLAIGGYFLFDWIWQTWGWGHENIGRLFSGGFIPIIYTLIGIKVGTELSGIVDNMLKEEVKE
249		TRUE	PFDSM3638_08915	2-oxoglutarate ferredoxin oxidoreductase subunitgamma	19.5786	5.97466	1	33.5 (M.score:33.5)	1	7.77778	1.21024	249	MRKEILLGGFGGQGIILASVILGRAAAVYEGLYAVQTQAYGPESRGGASRAEVVISDEPIDYPKTVSPDYAILLSQQAYNKYLPLVKKGGIVILEEDLIPHRDPELEKDKEVHALPLTKIAEETTGLSLTMNILTLGYFVGITKIVKKESIEKAVLDSVPKGTEKINLKALHKGFELSEK
250		TRUE	PFDSM3638_05165	hypothetical protein	37.2749	5.1739	1	33.3 (M.score:33.3)	1	5.3125	0.98547	250	MVRYVIPLMLVTLIVNLVFALPESYDTNALLRLYDTNKEILSKFDYTPEIKREEITSELEHDNLVFAFEKLSKLSLTTIHILESKEGTIDSKEILEARISRVEYYLNLLPSNRKTLKIKEKINAAKEELKNGKIEIATNYTSEAYRLLDDVLTSGEPLEIDPKTRAIILLEKFNRTIIYATQIFIASGSNTSYEALYLQKLIERCDKLIESERYLEALYELEGNIGYVEMFQNELESIYVDYIKNRFETERKEYLIQLMLSLNRIKSLVKEAEKIELVEIASADLNLALKDVNLGRYETAYLRVRRASKILDYLVRTMEV
251		TRUE	PFDSM3638_08715	hypothetical protein	26.124	4.78307	1	33.2 (M.score:33.2)	1	4.95868	1.43802	251	MRRGLSLLGFIIGAVIGIIIGALILAGIFLLALGSTISFLDFPNCHCTCETINNAGPIKEIGAYNATSLIIEDVIGTVKIKPSNEPQIKVLSNLPINVSVSEDSLVITCSECREKSFKNGEIILMGNLSSIKTSDILGRLIVEVPTKRIEVGDVLGEVNIQAYTEVFESEDILGRAEIKATREVQIEDVIGEVKITIPKNSTAKISYSKIIGKIADLSEDSNKIVKVDIEDILGELTVENEK
252		TRUE	PFDSM3638_03160	flavodoxin	17.3294	9.49357	1	32.9 (M.score:32.9)	1	5.96026	0.296808	252	MDSIIVYVSIHHKNTEKVAKVIAEVLNARLVKPWEIKPEELLKYDLIGFGSGIYYWKHHRALFELINKLPKVEGKKAFIFSTAGLNIPFINHRKLRKVLREKGFEIVGEFSCRGWDTNGWLAEIGGLNKGHPNEKDLENARKFAENLKASI
253		TRUE	PFDSM3638_10395	aminopeptidase	65.4942	8.48356	1	32.5 (M.score:32.5)	1	2.1164	8.84211	253	MKMRRIFITLICIGIILFFTFKNVTIHDNNNLENFQIIDGKDIPKSNASFHGVTYLTTHNFSKLEVRSYIELTINPSSQKSLEVDGKKILTVKNVRESDTSRISLIFPKRVVIGNITAKGCFIKNVSIVTMPQANILVLVLKIPKDKIGNITIEYHAEVMRFEPFVSYIEMRESWSIFRTTYDGNELVLSSMWLLRELETFESYESQIRLKVPKGWEGVVIDEKGEGFWEVIYKGSTREGNILVYSSKNSRDPLIIVGNFSLIRKNLSGITINVYQVGRKREDVVYVVSKIVRSYSRILGGYPYSSLKIFYLESLNTKAGFEFPQGVILIHPKRNETLLLAHEIAHSWFGDYASFGRMDETLANYLAIMSMNSYEVLNFVEHSPLINSTYTLAQVYTED…
254		TRUE	PFDSM3638_00045	class II glutamine amidotransferase	29.7591	5.28402	1	32.4 (M.score:32.4)	1	3.80228	0.195262	254	MCRILLAVGEGQRIVPWIEAFVKASENDPYKEARGKGRSHKDGWGYVLITEDYVKHYKSRRPVFEDEEVDELKGSISNFSVLMAHSRAASQGSVETFNAQPFSFGSPHGYQLYFMHNGDLNKSMLLEALKLPAEKFLNVSDSYVAGMYASLFITSQEDEEIVKAISALKEVVNTSLNVGMILASPGKLKVVGVAYMREEFLERKAERDYMRLISFPDSDLFVLASSTLELYTYFPVDDVPNATLFALDVNLKEKEFEVRKYSF
255		TRUE	PFDSM3638_04230	DUF512 domain-containing protein	41.1818	5.27419	1	32.2 (M.score:32.2)	1	4.18994	1.13405	255	MYELTEDFKLRKITKYELDGVDEREDLLVIPPSSKAGPCGNGCLFCYLLQNPPEMIYRVARHDTLNDPTLEERIRYARKHYDLWIRVTDTSGNVKFDENRIKSLYEAGLDEIQISVHTTKKDVRIKLMRNRHAGKLIDLLPLVAKHFRTIADIILTPGFNVDDIGEIIEDLDSMGVHEVRLFPVGVTKYNRFEIRPLTKEELSYVKEVALEKDKELGIKVVIPPIFLALLGEFTTGLEPFNIEPEFPTYIFTGELAYPEMKRLFPRIKVVMVKNEFFGGNIGTAGLLTGRDVLREVERLPEVDFGLILLPELMFYGDMTLDGWRRQDLFSKILIEKGYIVETALEPTEIPKVIEKISL
256		TRUE	PFDSM3638_09155	50S ribosomal protein L22	17.6326	10.4593	1	31.8 (M.score:31.8)	1	7.09677	0.618138	256	MAKRFGYSFQNFDPKRMARASARDLRISPKLAVEVCRELRGMMLNDALRYLDDVIALKRPVPLKRYNDSQGHKPGKGFGPGRYPVKVAKAIKKVLLNVKNNAVQKGLDPDKLKIIHIAAHKGPVLRGWYPRAFGRATPFNEQTTHIEVVVEEIRR
257		TRUE	PFDSM3638_06630	cytochrome-c3 hydrogenase subunit gamma	32.9239	8.43645	1	31.7 (M.score:31.7)	1	3.47222	1.50823	257	MNPYRSYDARIIEVKELTSREKLFSLKFLDNEIEENFTFKPGQFVIVDIRGFGEFPISLCSSPTRRPIQLCIRRVGRMTKFIHKMNEGDIIGIRGPYGNGFPMDLMEGSNLILIAGGLGMAPLRSVLWYAIDSGKYEKIYLFYGTKSYEDILFRDEIIHLLKHGEKLNCHVKLAYEVETPSCIYLERGFSEKVCKGVVTDLFRGEEFDVENSYALICGPPVMYKYVIRELLDRGLSPGRIYMTLERRMRCGVGKCGHCIVGTSVSIKYICKDGPVFTYWDALSTRGLI
258		TRUE	PFDSM3638_06515	hypothetical protein	53.7767	4.82088	1	31.7 (M.score:31.7)	1	1.44628	1.22217	258	MVGALRGQVFSMDALVSMVIVVMIIGTVSATSESIKNEIVSLIDWYERANVAENMLDVLLKSPGEPEDWHLDISKLEVVGLRSSNRSYALDYLKVMKLSSPEVIGKAIDISNGKDFMLEVFLSRYNVSINGTFPRVYLANVTFGLDNPSGGANFRVESPDGRDFTVSYILLRRSDGTEYENEEVCKLVKGNVLKLGNKNNKKEDESYINYMKIITTESTSIDDKKDDRPPIIVPPGTVIEIFILNKTSDLQINFNPCWQTLKITGQGNVVVTVSAYDSTVPNILGNYTFAQVVELQDIPTLSFSVINGTVINDKIIIEASMERSPWVEVEKRTVSIETFLYDLSANPSSEVPMIYGVLRSQLPAGSYLKITVPDLPGNMSFVVLSKSDMSGLMIYRMPF…
259		TRUE	PFDSM3638_03460	MBL fold hydrolase	43.7138	5.65562	1	31.7 (M.score:31.7)	1	3.32481	1.87094	259	MKSVKLLDGVYWVGVKDWSRRIFDSLIPLPEGTSYNAYLVVGNEKSALIDTVNPGFERELEEKVSEIVPLKEIDYVVMNHAEPDHAGAIPYIMERNKKALLITTEKGKELAKAYYNVPDERIIVVKDGDEVDLGGKTLRFIEAPWLHWPETMFTYLVEDKVLFPCDFFGAHTAHGLYDDEVPSIIEYAQRYFGEIMMPFAGMAKRAMEKLKGLEIKMIAPSHGPIYRNPERILKAYESWVNGETREKVLVAYVSMWGSNREMAKELADLLVAKGIDVKVYDLVSADIGELAKDLVDSRAIVLAAPTVLGSAHPLAVYAAYLVKALRPPAKYAVLIGSHGWHGRSIDAILEILKGANFEVLGTVDAHARPKEEDYKALHSLADLLAKKVRGE
260		TRUE	PFDSM3638_07550	photosystem reaction center subunit H	10.3587	4.6424	1	31.5 (M.score:31.5)	1	16.3043	2.23023	260	MVKIRASKLRDVELITDTGVRLGWVYDLLFEEEGEEKGKILAILAEPDEDIDISKFRITEDELLIIPITAVKSIGEVIIIDSSKLAQVIRAR
261		TRUE	PFDSM3638_00505	ABC transporter ATP-binding protein	41.4114	6.00489	1	31.3 (M.score:31.3)	1	2.47253	0.868704	261	MVSIKLEGIVKKFGNFTALDNINLTIKDKEFMALLGPSGSGKSTLLYTIAGIYKPTAGRIYFDDRDVTELPPKDRNVGLVFQNWALYPHMTVYKNIAFPLELRKLPKEEIDKKVREVAKILHIENLLERYPWQLSGGQQQRVAIARALVKEPDVLLLDEPLSNLDALLRLEVRAELKRLQKDLDITAVYVTHDQAEALAMADRIAVIKEGKILQVGDPDEVYHKPKYKFVGGFLGNPPMNFIEAKIEDGKLVISSENILDIPPQYREIIKKLDVKEVYIGFRPHDVEIVREGKEGLVGEIYSFEPLGREQILTIFVNGNVVKVFAPEEEHFRFGEKVNIKIKSESIVLFDKKTEKALEFLVNEP
262		TRUE	PFDSM3638_00645	transcriptional regulator	35.5431	5.30848	1	31.1 (M.score:31.1)	1	5.2459	0.177813	262	MEFRKIQFTGRSSYIVSLPKAWIREHGLKQGDLVSLVFNPDGSITIFPGKPKEEEETKTIEITEKFSPDMAIRLVISAYIQGYDTIEIIINKELPIYKVYVRKILQSLPGVEIISEEPQKIVAKSLLDEEEISFGEILSRMKSIIISMFEDLYGIINSQEAREELLRDLNDLENELDRFYFLMIRTVNRILLRKGSFKEETIIKRTFDLIGILLIARNIERIGDHIIRIAENPGKIDVGYLKEKFVQVIREIERKNLERLDKLMLELSEEAKKINYRESVAMDSYRRILEYLENIGETIINMAIS
263		TRUE	PFDSM3638_10120	pyridine nucleotide-disulfide oxidoreductase	45.4656	6.31475	1	31.1 (M.score:31.1)	1	3.1477	2.02898	263	MLESYDVVVIGGGPAGMGAAIKAKELGLKVLLLDDNDFLGGILPQCIHPGFGLHYFKEELTGPEFAYRLINKLDGVEVKTSARVIEIQNYSDLEKFVTYVSPEGVKKVATKTIIYAAGARERHAFEIGIVGDRVAGIYTAGEAQALMDLYGILPGRDIVIVGSGDVGLIMARRFALEGCNVKAVIELMPYPGGLARNLMILKDFNIPLYLSHKVVEVRGRKRVEKVKVVKVDENLREIPGSEFWIEADTLIISAGLIPNVKLLQEIGVRIDPATGGPVVNDRLETSVPGIFVAGNSLLINDLVDYVVEQGETAAEGAKEFIENGGIKSTRWIKLVKGENVRLVAPHYLSGERDVWIYARVQRPIEDVTLEFPEIGKKLRLPVVKPSEMLRIKLRGEEIR…
264		TRUE	PFDSM3638_08890	2-oxoglutarate synthase subunit alpha	43.9628	6.11298	1	30.8 (M.score:30.8)	1	3.28283	0.936651	264	MIIRGDEPEQKALLRKLYRAGNYFMMGDEAIAYGAIFAGCRFYAGYPITPSSEIAETMARELPKVGGYYLQMEDEIASIAAIIGASWTGLKAMTATSGPGFSLMQENIGYAVMTETPVVIVDVQRSGPSTGQATKGAQGDFFQARWGTHGDHPIIAVSPISVEDAFWETIRAFNIAEQLRTPVIVLFDGILGHTREQIRIPDPDEVEISYRKLPRNEEEAKLPFGDPHGDGVPPMPIFGKGYFTHVTGSTHKENGLRDVYTPEVHDRLVRRLHKKIEKNRHIYEKYNEYFTDDAEILVVSWGVSARPSLGAVKKAREEGIKAGLFVPKTVHPFPGEKMRELGKKVRAILVPEMNLGQLILEVQRFVNDDVILKGVNKIGGVPITVEEILREIRGVA
265		TRUE	PFDSM3638_04895	transcriptional regulator	15.9022	8.40089	1	30.6 (M.score:30.6)	1	9.55882	0.846743	265	MGKPMQVSRYWRHFREKYRLIGGKCENGHLLFPKRPICPICGSRNIEEFQFSGKGKVITWTIVRNPPSGFEYYKPYPLALVQLEEGPVVLAQLTDVEPEEIKEGMEVEMVTRKIREFDEDGLILYGYKFRPIIKSE
266		TRUE	PFDSM3638_10350	transcriptional regulator	15.7213	7.6484	1	30.4 (M.score:30.4)	1	6.06061	1.75216	266	MKIRELIEKLNEKQKKTVMSCLSKCEILDLDEEIETYPSKEISRFLKVISNPIRYGILKMLNDRWMCVCLISEALEIDQTLVSHHIRILKELDLLEERKEGKLRFYRTNKEKLREYLEKVLEDFNHGTSKGS
267		TRUE	PFDSM3638_00460	fuculose phosphate aldolase	21.2824	9.75002	1	30.3 (M.score:30.3)	1	4.7619	0.511091	267	MRNIKAKLIHYSKLAHRKGLTGSFGGNMSIRVGNYVFIKGTGSVMEELTESQIAVVKLDGKVVSSVRPSSEYRLHLGVYRNRPEVRAVVHLHPPYSIVLSIFEREAPMITPEAELYLKKVPVLPFRPAGSVELAQQVSEAMKGYDAVVLERHGVVTVGRSLREAFYKAELVEEVARLWYQKFIASREKN
268		TRUE	PFDSM3638_07130	cation:proton antiporter	13.4953	9.62868	1	30.1 (M.score:30.1)	1	5.64516	0.411432	268	MIAYYLIIAFLGISVTFNMLGSIALHRFPDVYTRLHGATKCTTFGTIFAALAVITHAIVKLQATGNPKYLQMAIHSFVAMLALLLTNPVGAHAIAKAAHKTGYLPKRAVVDAYLEKERGEKNES
269		FALSE	PFDSM3638_00910	ABC transporter ATP-binding protein	35.8457	6.20933	1	29.7 (M.score:29.7)	1	3.44828	0.342703	269	MAKKILEVKNLKMYYFTSRGPVKAVDDVTFDLEKGEVLGLAGESGCGKSSIGFTLMGMPQPPGRIVGGSIKIDGREIVGLPEDVLRKEIRWQKISMIFQGAMNALNPVYTVGYQMIEPLIYHKGMEREEALDRAMKYLEMVGLDPEVVYRYPHELSGGMKQRVVIAMALLLEPDIVIADEPTTALDVVVQAQIINLMKRLKKKLGLSMIFITHDLSILAEISDRVAIMYAGKIVEIGPSEKIYYEPAHPYTQKLLAAIPRLHEDVEKLEFIPGSPPNLINPPSGCRFHPRCPYVMDRCKQEEPKLIEVDKDHYAACWLL
270		FALSE	PFDSM3638_03970	GNAT family N-acetyltransferase	40.8323	9.55029	1	29.6 (M.score:29.6)	1	2.88184	1.7733	270	MNIAEIEVTHKVKEKEWKEFLSRSEYATVYHTPEWKKTLEESFGYKPYYLFVKDESDLIVGMLPLFYVKSKLTGNRLSSLPFSHISGPVGDKATKNFLISEAINLYKNLGASYLEIRDRVEDNRFLSKNMFSTYILELNPNIEEVWKQLHKGSVRRAIKKSEKSGVVVDTAKDIESLKEFYDLNCVGKRKIGVPCHPWKFFKNLFRFMNDYISLYVAKYQNNIIGGGIMIYYKDTVIYGYGAAHPHYLKLYPYNAFLWKSIKDACLSRYKYFDLGRAHYNVERGLMDFKRRWGTIEKKLYYSYYSKNKDLKILDMSGLKYRLGTKVIRKMPMPIYKKFSDRIFGSLG
271		FALSE	PFDSM3638_06910	hypothetical protein	16.2217	8.17306	1	29.2 (M.score:29.2)	1	11.1111	0.694006	271	MVITLVGEKLAKPGVEFIYYGPAEPCKSCRLARVCTGNLEPGRRYKIIKVRNMEYPCLLHEGKVRVVEVVEPAIDVIIEPRYAVAGSKITLKFVECDDPEKVDLVRPEGLFEGDVVKILEIIGDIECNGRKYKIAKVIRENTQK
272		FALSE	PFDSM3638_07755	acetyl CoA synthetase	49.9332	6.02348	1	29.1 (M.score:29.1)	1	3.67965	2.07641	272	MSLEALFNPKSVAVIGASAKPGKIGYAIMKNLIEYGYEGKIYPVNIKGGEIEINGRKFKVYKSVLEIPDEVDMAVIVVPAKFVPQVLEECGQKGVKVVPIISSGFGELGEEGKKVEQQLVETARKYGMRILGPNIFGVVYTPAKLNATFGPTDVLPGPLALISQSGALGIALMGWTILEKIGLSAVVSVGNKADIDDADLLEFFKDDENTRAILIYMEGVKDGRRFMEVAKEVSKKKPIIVIKAGRSERGAKAAASHTGSLAGSDKVYSAAFKQSGVLRAYTIGEAFDWARALSNLPEPQGDNVVIITNGGGIGVMATDAAEEEGLHLYDNLEELKIFANHMPPFGSYKNPVDLTGMADGKSYEGAIRDALAHPEMHSIAVLYCQTAVLDPRELAEIVI…
273		FALSE	PFDSM3638_07470	tRNA 4-thiouridine(8) synthase ThiI	35.184	8.9202	1	28.9 (M.score:28.9)	1	6.18893	3.25575	273	MNSIIVRYGEMGTKSRQTRKWFERILVNNISEALVSEGIEYKEVFSKHGRVIVRLNEVEKAKEVLPRVFGIVSISPAMEVEASLDKINKTALKLFRKKKRELGIEKPKFRVTARRITKEFPLNSIELQAKVGEFILESEDGEVDLTNYDIEVGIELMEGKAYIYTEKIYGWGGLPIGTQGKMVGILDSIEAGVAIFLMMKRGVEVIPVYVEGQGDEDLVRTLWRNLKKYSYGAKVRFTVVKNFESINDIIRHFGAKGVIRGIRKEVIDREIEEIIRRDAELFIVPVYYPVIAIPDEIFEKVRNAIYP
274		FALSE	PFDSM3638_02195	glycoside hydrolase family 1 protein	49.7283	6.78493	1	28.9 (M.score:28.9)	1	2.13777	0.634453	274	MPLKFPEEFLFGTATAAHQIEGDNKWNDWWYYEQIGKLPYKSGKACNHWEFYKEDIQLMASLGYNAYRFSIEWSRLFPEENKFNEEAFNRYQEIIDLLLANNITPLVTLHHFTSPLWFMKKGGFLREENLKFWEKYVEKVAELLEKVKLIATFNEPMVYVMMGYLTAYWPPFIKSPFKAFKVASNLLKAHALAYEILHGKFQVGIVKNVPIMLPATDKERDKKAAERADNLFNWYFLDAIWSGVYRGAFKAYRVPQSDADFIGINYYTASEVRHSWNPLKFFFDAKLADVSERKTQMGWSVYPRGIYIALKKASKYGKPLYITENGIATLDDEWRIEFIIQHLQYVHKAIEDGLDVRGYFYWSFMDNYEWREGFEPRFGLVEVDYETFERRPRKSAYIY…
275		FALSE	PFDSM3638_00810	preprotein translocase subunit SecF	32.3764	5.04198	1	28.8 (M.score:28.8)	1	4.39189	0.445426	275	MPEVDNVIKEKLKLLVEMDPKKMIIYPLIVFGIAIIIIIANYVMTGSFVKEGIELRGGSVITLQGVNVSPDEIAKSIKEKTGIDVTVEKFSGVGGSGVRVYVSAGDDVNLVREALKEMFPDVEPQTVVIGPTFGEIVREQGIKAIVYAFIGMAIVVFLFFRVPVPSMTVVFSAFSDMIIAIALMNIFGIELSQATIAALLMLIGYSVDSNILLTTRLLRRKEFTVEEAYYSSLKTGFTMSTTTLGALASLWIFSTAQVIDDIASVLIFGLLADFMNTWILNAGVLRLYIAKREGKE
276		FALSE	PFDSM3638_10045	50S ribosomal protein P1	11.2387	4.29324	1	28.8 (M.score:28.8)	1	15.8879	0.553179	276	MEYVYAALLLHSVGKEINEENLKAVLQAAGVEPDEARIKALVAALEGVNIDEVIEKAAMPVAVAAAPAAAPAGGGEEKKEEEKKEEEEKEEEVSEEEALAGLSALFG
277		FALSE	PFDSM3638_04870	pyruvate ferredoxin oxidoreductase	43.9322	5.28103	1	28.7 (M.score:28.7)	1	1.77665	1.1518	277	MEYKPIRKVVSGNYAAAYAALHARVQVVAAYPITPQTSIIEKIAEFIANGEADIQYIPVESEHSAMAACIGASATGARTFTATSAQGLALMHEMLHWAAGARLPIVMVDVNRAMAPPWSVWDDQTDSLSQRDTGWMQFYAENNQEVYDGVLMAYKVAETVNVPAMVVESAFILSHTYDVVEMIPQELVDEFLPPRKPLYSLANFDEPIAVGALATPNDYYEFRYKLAKAHEEAKKVIKEVGKEFGERFGRDYSQMIETGYIDDADFVFMGMGSLMGTVKEAVDLLRKEGYKVGYAKVRWFRPFPKEELVEIAESVKGIAVLDRNFSFGQEGILFTESKGALYNSSAHPLMKNYIVGLGGRDVTVKDIKAIADDMKKVIESGKVDKEVVWYHLKR
278		FALSE	PFDSM3638_03190	CRISPR-associated endonuclease Cas3''	27.0593	8.31469	1	28.5 (M.score:28.5)	1	4.64135	0.00913359	278	MSCKAFQGQTLREHIEAMLAAWEIVKNKYIPSIIRVMKTVGVKFTEEDADKFMKTLIILHDVGKCSEVYQKHLSNNEPLRGFRHELVSAYYAYNILKDMFKDETIAFIGALVVMMHHEPILMGQIRSLDKEELTPEVVLDKLRTFNGVMEGTESFIKSMIKEKLGVIPKVPSPTQEDVLREVIRLSVLARHRPDSGKLRMVVGALLIPLVLCDYKGAKEREGESPKFAEVLRVEMMK
279		FALSE	PFDSM3638_03000	aspartate carbamoyltransferase regulatorysubunit	16.8791	7.63612	1	28.4 (M.score:28.4)	1	9.21053	0.868596	279	MAELKVSAIKEGTVIDHIPAGKGLKVIQILGLGELKNGGAVLLAMNVPSKKLGRKDIVKVEGKFLSEEEVNKIALVAPTATVNIIREYKVVEKFKVEIPDVIEGILKCGNPNCITHYEYVTPKFYVISKEPLKVRCHYCERTMEEEEILANL
280		FALSE	PFDSM3638_10455	ABC transporter ATP-binding protein	30.1962	8.46636	1	28.2 (M.score:28.2)	1	4.49438	0.226467	280	MLVVKDLNVEYDNVKVLKGISFALNSGEKAIILGTNGAGKTTLLKSLLGLIPIKSGKIQICGKPYEKVVGEKKVSTNLESVYKLVYSIKVSELIDLYCDLKEIPSQQILNFIKEMKLEHILEKKFYNLSSGEKKCLTNLLAFFTDSKLILLDEPFEGLDPWRTNKTVEILNSLKSSIIMTTHRLDILSKFSTFKVYFLFNGHLYGPIRSASDLVNCYVTFSDIEEGESDIVLRIQGDKKNVILTRRPIGQKISDYASIDEIYRVMLE
281		FALSE	PFDSM3638_00100	ABC transporter ATP-binding protein	36.165	8.64741	1	27.7 (M.score:27.7)	1	4.96894	3.75631	281	MTMVDVISVTKTFSTPKGKVVAVDNLSFKVKRGQVFGILGPNGAGKTTTLRMMATIYRPDSGRILIDGIDVVENPNEARKRMAYMTQEPDLSPTLSVRDYITYYFRFRGLSKREARERCSYALKTFNLEEHANKKPFQLSTGLKRRVQLACVLSSDAPLVFLDEPTAGVDPKSKRDAWELIGEMVREKDMTIILSSHDLYEVEYLADEVLIINYGKAVAQGRPSELKRRFGKTLRIVTKNPILDFEKLRDTLTSIEMVENVRAITKNSFEVKLNSLDAPINDVLQATMSLGLEIVDAFTATLTFEDVYLSIVDVGGEINGKR
282		FALSE	PFDSM3638_10245	TIGR01210 family radical SAM protein	38.3589	7.5041	1	27.6 (M.score:27.6)	1	4.24242	1.56393	282	MYWIGKDNVAGKPGSVLYIILPTIGCYRYRIGKPCYMCSYPAQSPKETTQEKILNYFREAIQKIKGEEGRFSVRIFTSGSFFDSAEVRRETRIKIFEELAKLENVYEIVVETRSELVKEEWVRELAKIVEGKRFEVALGLETANDHVADISINKGNTFEDFIKASEKIRNAGAYVKTYLLFKPIFLSEAEGIEDVKESIEKAEPYTDTFSINLTNIQKGTVYEIIWEKGEYRPPWLWSVVEVLKWAKRKFPEKRFLCDPVGAGSKRGPHNCGGAKDRKVEKAIREFSITQDVRVLENLEKECYKEWRYIVENNILDWQLSIARVSQYSEW
283		FALSE	PFDSM3638_02980	ornithine carbamoyltransferase	35.159	5.89669	1	27.4 (M.score:27.4)	1	5.71429	0.496618	283	MVVSLAGRDLLCLQDYTAEEIWTILETAKMFKIWQKIGKPHRLLEGKTLAMIFQKPSTRTRVSFEVAMAHLGGHALYLNAQDLQLRRGETIADTARVLSRYVDAIMARVYDHKDVEDLAKYATVPVINGLSDFSHPCQALADYMTIWEKKGTIKGVKVVYVGDGNNVAHSLMIAGTKLGADVVVATPEGYEPDEKVIKWAEQNAAESGGSFELLHDPVKAVKDADVIYTDVWASMGQEAEAEERRKIFRPFQVNKDLVKHAKPDYMFMHCLPAHRGEEVTDDVIDSPNSVVWDQAENRLHAQKAVLALVMGGIKF
284		FALSE	PFDSM3638_09595	hypothetical protein	19.5212	9.22205	1	27.1 (M.score:27.1)	1	5.17241	1.03906	284	MKKLSALFVVLLVIGTVAQIVAAQTADSREVAPQDAGGYWELWKVENVKYVGVTYGFWKTVKEAYGYAGQEYSFSSWIAWSHKISGSVMVAYSVLSASLGFDVTATGVVKVSISGKFEHDAQVVAFQIRPKYEEYEVTQRKYIHIDGQNYPTGEIKKALVKKFLFYQVRVKPLN
285		FALSE	PFDSM3638_07225	NADH-quinone oxidoreductase subunit C	20.9168	5.8969	1	27.0 (M.score:27.0)	1	6.32184	1.24099	285	MTWEKGEEIVKQILEKAPYAEGKVRRERRLEFRVPADKIRDFLRIMKESNFPLMLQITAVDWPKEGEIELVYHLINVELGTHAMVKTRIPRDLDKARMPTVKDIYPAAETYERDVHDFFGVYFEGNEKMEMPWILDDPERGLYPHRKDFDMLAYVKKKYKILDRFDEDKDKYVI
286		FALSE	PFDSM3638_01475	glycosyltransferase family 4 protein	37.4794	9.54153	1	26.7 (M.score:26.7)	1	3.27381	9.30884	286	MRILLVGHYPPHKGGVARHVKQLKECLEKRHEVYVLTYGTVAVEEENVYSVKVPNIFGIRGTSFALLASKKIVKLHEKYNFDLVHAHYVGTTSFAGVLAKRKTGVPLVITAHGSDLEFMSRLPLGGYFVKTSIMEADYVIAVSHYLAKKALELGASRISVIPNWTELSGESERKYILFLGRVASYKGIEDFIELAKRFPGEEFVVAGEGPLLKKLRAKSPPNVKFLGYVPAEDVLKKAKVLVLPSKREGFGLVVIEANSFKVPVLGRNVGGIRELIRFSKNGYLFEDIEDAITYLKTLLVPKTNVKLGSIGKRISKGHSQEKMCERVEEIYREVIS
287		FALSE	PFDSM3638_00325	2,3-diphosphoglycerate synthetase	47.2482	6.25002	1	26.5 (M.score:26.5)	1	2.09302	13.5434	287	MKLALIDGEHYPDVNRWAIEKIKPCCAVFVGGTEKIGSIRDIEKALNIKVYHSPNIFEALSKAISENNITEVIDLSDEPVLTPNLRFRIASYLLKLGITYKGADFEFRAKEWKKIDIPSISIIGTGKRVGKTAIGGFVGRTLKELYKVVIVTMGRGGPEKPEVIRGDLMEITPEFLLKVSEEGKHAASDHFEDALTAGVITVGCRRCGGGLAGFSFFDIIDEGIEIAKSLNPDIIVFEGSGPTFPNVLADGFITITSAIHGTEKIEQYFGPLRIGLADIVVVTMADSVSEEKLKRITQAIREINPEADIHLTRFVPRLIGEVDGKAIIATTNPQSAKKFSEELEKMGIEVVYYTGNLAKRNILKDELAKVNYDTAIVELKAGAVDVVIRHAFSRGKRVV…
288		FALSE	PFDSM3638_06380	50S ribosomal protein L16	20.9221	10.3022	1	26.4 (M.score:26.4)	1	4.41989	0.210984	288	MALRPAKIDRYVDKPAYTRREYIRGAPGPKITIFDMGNPAGDFEFEVSLHTAEPVQIRQNALEAARQQVNRYLQKNVGRSNYHFKIRVYPFQVLRENPMATGRKADRYGNGMRRPFGKPIGLAARLKKDQKILSIRVNRQHLKFAIEGARRAAMKFPCKCYYRIYDKEGNDVTTKILSQSL
289		FALSE	PFDSM3638_06350	allophanate hydrolase	25.8935	5.05918	1	26.4 (M.score:26.4)	1	5.72687	2.73907	289	MKVRVVGDSCIAIIFGEDISEETNRKVHALADYLLNYNPEWLLDVVPSYSALYVYFDPLMIDYREVIDIIGKIKINEVERKEKRIIKIPIAYGGEFGPDIEFVAKYNGLSVDDVIEIHSKPLYRVYFLGFLPGFAYLGGMDERIATPRLEKPRLKVPAGSVGIAGKQTGWYAIESPGGWRIIGRTPLRTFNPEKIPPSIVSPGDYVKFVPIDENEFWEIYREEWGND
290		FALSE	PFDSM3638_09330	tRNA(Ile2) 2-agmatinylcytidine synthetase	48.7201	9.16865	1	26.3 (M.score:26.3)	1	2.12264	0.801187	290	MLIHIGIDDTDSPNGMCTTYIGAILYREISKIAEPLDFPRLIRLNPNVPYKTRGNGAVAMSFKIDEEKIKEVKTLVIRYVRELADIDHENTNPGIVFLIGEVPKELEEFSLRALREHVTIEEAEHVARKVNAEVYKFKLGRGIIGGLAAIGYPLEKFTYELLAYRKREYWGTPRRVIKESVFYADKWSYPFTYDNVDPYKRTVLITPHGKDPVLVGIRGIDVGKILQVFEMIKIEEPIEFFQVYKTNQNTDDHLVVKKIKDVKPYDNVVIRGKVAGKYWEKGRHVFFELEDETGKIRVAAFEPTKKFRNYVRKLLPGDEVIIAGGVKEFEGVLTVNLEKFYPVNLVPKVEYEKPRCPKCGGTMKSKGDYLKCKKCGYKMEKILTPVKRPRDLKKKIYEV…
291		FALSE	PFDSM3638_00755	hypothetical protein	21.5307	5.72868	1	26.3 (M.score:26.3)	1	5.85106	1.47102	291	MEINEFISQLKLGETVLVEHSSYSKPELLFYGIIKESRMPVVIDDILDTLFEYYNKLKVWGYDLTVFDKVYVIKAGGNEVIGNLLGKLEVGKYVIEAREYTKIIKEVNPPIINPVLGVHKLILLGNLLENLRLLKEISTYVGNENRVAIYFVNRDVVESHSPAALKLLEEISTSVFQLNEENKIKRMK
292		FALSE	PFDSM3638_09165	50S ribosomal protein L2	26.0211	10.3792	1	26.2 (M.score:26.2)	1	4.60251	1.41684	292	MGKSLIQQRRGKGSPTFKSPSHRFRGAVKYIPLNYTQEKTLRGVVEEIMHDPGRTAPVARVKFENGIEKLIIAPEGLLVGQEIYIGPDAPIAVGNTLPLAKIPEGTYVYNIEGIPGDGGKYVRAGGTYALVVSREPDKVIVQLPSGELKAFNPMCRATIGVVAGGGRLEKPLVKAGKAYYKYKARNKFWPTPRGVKMNAVNHPFGGKEHHPGKPTTTSRRAPPGRKVGHIAARRTGRRK
293		FALSE	PFDSM3638_09120	50S ribosomal protein L24	14.3229	10.3642	1	26.1 (M.score:26.1)	1	8.26446	0.297438	293	MKISSKQPRKQRKFLYNAPLHVRQKLMSAPLSRELREKYKVRNLPVRVGDKVRIMRGDYKGHEGKVVEVDLKRYRIYVEGATLRKTNGTEVFYPIHPSNVMIIELNLEDEKRKKIIERRAG
294		FALSE	PFDSM3638_04515	hypothetical protein	38.6881	6.48714	1	26.1 (M.score:26.1)	1	5.43807	3.39044	294	MHLRYYAPCYEKETHEKILNYLEDIKKLHNINYEEIPVRHWVPEWYSRKAEISEAYVYDNHLKPYSSLILSNCNKLLQMGLDLHCDTVSSKFKSRSGNIYVAGTIAVVENGVTLLALADKDEIFEFLKALLREGWNLLNMLEKTKPKTIVEPREREKEIKRALILALSKNFDYVLMDVKLNALSGDEWDPFIYFSPDADIIAVNERENHIIGIEVKGYRSNKGIIQKANIYEAIGEAMMYLLNPYMKYKGEKIEGSIFDEVWLCYPYKRDFEDFKRVIEITPIGLLSAYEGVVKRPEKNPFVNERAKEIFLENLSTFRSYIQGGRKMHKIV
295		FALSE	PFDSM3638_08970	ADP-specific phosphofructokinase	52.3039	7.09202	1	26.1 (M.score:26.1)	1	2.20264	2.28606	295	MIDEVRELGIYTAYNANVDAIVNLNAEIIQRLIEEFGPDKIKRRLEEYPREINEPLDFVARLVHALKTGKPMAVPLVNEELHQWFDKTFKYDTERIGGQAGIIANILVGLKVKKVIAYTPFLPKRLAELFKEGILYPVVEEDKLVLKPIQSAYREGDPLKVNRIFEFRKGTRFKLGDEVIEVPHSGRFIVSSRFESISRIETKDELRKFLPEIGEMVDGAILSGYQGIRLQYSDGKDANYYLRRAKEDIRLLKKNKDIKIHVEFASIQDRRLRKKVVNNIFPMVDSVGMDEAEIAYILSVLGYSDLADRIFMYNRIEDAILGGMIILDELNFEILQVHTIYYLMYITHRDNPLSEEELMRSLDFGTILAATRASLGDINDPRDVKVGMSVPYNERSEYI…
296		FALSE	PFDSM3638_05665	type III-B CRISPR module RAMP protein Cmr1	38.7137	10.1272	1	26.0 (M.score:26.0)	1	3.56083	1.65336	296	MFIEEFEIEFITPAFIRGADQRIPEVRSPSIKGAMRWWFRALAGSYFGDDAQKLKEIENQVFGSTKERSRVKISVTPLSSPKRLNLKEFKDKNVGYIWFSINLLGKRGTITHYYPPGSRFRVVLESPSERVIKLATLSLWALVSLGSVGFRSRRGTGSMKIVRASSEVLEDLGLTTEFNSIDEFKDSLKRVLDVTGEILGVKNSETNKSLPSYATLKFSDVEVFGPGKNTWEVLAQFNNSYKEYLRRRIKKYQRIIFGLPRFKLRGVRKDLRRASPLWFGVVEIGGKPYGRIIKFFQSTFHPEVRSKHIVDWNVLSNFDWFISSRLPVTKVWGGWSG
297		FALSE	PFDSM3638_10345	DUF2666 domain-containing protein	28.8817	6.81078	1	26.0 (M.score:26.0)	1	2.77778	0.0165865	297	MIERILEFTAKHEEWIVGENVEDFTNENIAMFLSRVSNTVSSKIPGYLGEKIDVNGLLSIKIEGSLEEKLKALISPKVSRQIGRLVMEDDKKLKKLLVEVAKAVLTREILKNELPIEFPGGKIEGLKIQPRYEEDHINFTARYGSWIVVKRMIIDEKTPLLDIARLLASINETAVNKIKDFADVDDKKIVEYFGGFKKVKKEEEIKEIVQLFREFKGNEFEVRYAAREMLSKLGLKVDVPSKNLEKYLEKAG
298		FALSE	PFDSM3638_08065	dCMP deaminase	21.0099	8.06678	1	25.9 (M.score:25.9)	1	7.56757	1.30463	298	MSIEIFLDKEKAEKIKKIRPTKDEYFMLIAKLVSLRATCPRLRVGAVAVKDGYILATGYNGAPRSMDHCIDKGCILVNGHCHRAVHAEQNVIAMAARKGISLEGATLYVTHFPCDTCFKLLINAGIKEIVYEEMYPNEVTEMLLKEAQEKGLIKIRQFKLPKERVLQFLEELFPEFCGCKNEEKD
299		FALSE	PFDSM3638_09930	ribonucleoside-triphosphate reductase activatingprotein	27.6424	5.21053	1	25.9 (M.score:25.9)	1	6.72269	1.81881	299	MLIGGWKAVSMVDIPGKVTFTLWLCGCNLRCPFCHNWKLAQGMECFKLEKEELIAEVEENSYLVDYFHVTGGEPLIQWREFQELLREVREYLPVSLNSNLTLVKPLEKIIDLVDHVATDLKAPPTELYGLPENVSLKLWQLFLKGLEIVSENSIPLELRIPVSKGFDIQEIMRWIEEGLEKIDTDFYVVLHPLVGPPITNPRNKEWCNNHCWADREIELIKEKLEERGVKKVIVRKYS
300		FALSE	PFDSM3638_01275	cation:proton antiporter	40.9108	9.04133	1	25.4 (M.score:25.4)	1	2.13333	20.6678	300	MEVLLLLSLMLAVAKIMGYIFERLGQPAVLGQIFGGLLLGLFIETNPVISEFANLGVLLLLFIAGLESELEEFKKVGKRSVIVAVFGVVVAFLFGFLVALPFTSFERAIIYGALMTPTSVSITVKVLMEMRKLNTIEGTTILAAAVVDDILGIIVLTFAISIARRVSIEYLKVMEVLVSVSALIFFFLYFGPRLAETFFRRLRIIDLPEVETAFAIVFLVLFSYLAEHLNLASILGAYLVGLAIGQTSQKKVILDHVNILGYSLFIPVFFVEVGMKMKAHHLLHVSSFAILYTLMAIVSKIVGCGIGAKLSGFNWRSSLKIGVGMIPRMGVELAMLSIAISAGVMDLASLTVIVVMVFVTTLITPPLLKVVYMKT
301		FALSE	PFDSM3638_07230	NADH-quinone oxidoreductase subunit B	22.6864	7.57182	1	25.3 (M.score:25.3)	1	6.25	1.20534	301	MVDWRLFEPLFNWARKKSLWIVAFCTGCGGIEMPPLMTARYDLERFGIMPDPSPRQYDLFLITGYVTPKTLKRIIITYEMAPDPKYVLAHGSCPINGGIYWDAYNAIKQLDKYIPVDVYIAGCMPRPEAVMDGIKKLMEMIENGEADGWKRYKENYEWYRKNQDELLGEGWREKEARKWIPWLMDKRKEVKE
302		FALSE	PFDSM3638_08375	ABC transporter ATP-binding protein	64.9191	6.96224	1	25.2 (M.score:25.2)	1	2.76817	2.86102	302	MESNSTLFLIKRFIGEVTRQKKILGIILLSIIGLTLTNLASPYILRIIIDEYLVPRKLEGLGFITALYLLTLIGQWAFMTLQTYYIEVFGQRVLRELRSKLHEKMLISNLDFFKNKSTGDLVSRIINDTNMVNDVLVSGLLSGVSSILSLSGIIIAMFLLDVRLTLVTLTSVPLMVAIALYFGGKMRRAYRETREKIARISTIVEESVAGIETIKAFGKERDVEKDFSLASIETIKAYLRVAVYMGIFWPLMNITSLLSVIIVIAYGGYLAYKGAVSIGVVVAFIQYAQRFRGPINNVVSMYDSLQSALAALERIYEILDDENVEDYKGINVERLTGEIKFENVWFEYEKGIPVLKNINLHISPGSKVAIVGKTGAGKTTMINLILRFYDPNQGRILYD…
303		FALSE	PFDSM3638_02950	phosphoglucosamine mutase	49.6011	5.69685	1	25.2 (M.score:25.2)	1	3.51648	1.10444	303	MGKLFGTFGVRGTANKDITPEFALKIGMAFGTLLRREGKKKPVVVVGRDTRVSGEMLKSALISGLLSVGCDVIDVGIAPTPAIQWATNHLKADGGAVITASHNPPEYNGIKLLEPNGMGLKKEREAIVEEIFFKEDFDRVEWHEIGEVREVDIIKPYIEAIKSKVDVEAIKKRRPFVVVDTSNGAGSLTLPYLLRELGCKVVSVNAHPDGHFPARNPEPNEENLKGFMEIVKALGADFGVAQDGDADRAVFIDENGRFIQGDKTFALVADAVLRENGGGLLVTTVATSNLLDDIAKKHGAKVMRTKVGDLIVARALYENNGTIGGEENGGVIFPDHVLGRDGAMTVAKVVEIFAKSGKKFSELIDELPKYYQIKTKRHVEGDRYAIVNKVAEMARERGY…
304		FALSE	PFDSM3638_02470	reverse gyrase	139.896	7.51307	1	25.0 (M.score:25.0)	1	0.988468	2.32841	304	MKAIYRDMCPNCRGAITDERLAAKNPCDACLDEPISMDDYFQLVTAIRKALKLKGVLKEWEEIYALNKEVKEIEELFKKATGFTFWSAQRSWVKRIIKGKSFSIIAPTGMGKSTFGAFMSIYFALKGKKSYIVVPTTPLVVQTVKKIKAMMEKAEVKVNLVYYHGNLKKKEKDEALEKIKSGNFDILVTSSQFLATRFDELLKDKRIDFMFVDDVDAFLKASKNIDRSLMMLGFNEEIIKKAWEIIKLKKQLAKLLQNESGNEEVEKLNREIERLEREIERYKKENKIGILIVASATGSARGDRIKLYRELLGFEVGSGRSVLRNIVDTYIIPEKSMEEHVEELLKTLGRGGLIFVPIDKGIEYAEQLTNYLKSKGFKVELVSARDKKGLELFEKEEVD…

## Sheet: Strep-tag only 1
Table S2. Mass spectrometry output of replicate 1 of Strep-peptide only co-purified proteins.
Row	User Flag	OK	Accession	Protein	MW [kDa]	pI	#Alt. Proteins	Scores	#Peptides	SC [%]	RMS90 [ppm]	Rank	Sequence
1		TRUE	PFDSM3638_00140	phosphoenolpyruvate synthase	90.4279	5.152	1	1644.7 (M.score:1644.7)	26	34.2717	0.980319	1	MAYRFIKWFEELSKNDVPLVGGKGANLGEMTNAGIPVPPGFCVTAEAYKYFVENVKVSKEDVKRILGEKVNKGTISEVLAQAPDEPRPLQDWIMDIISKTDVDDSKMLQENTEAIRTLIKSLDMPSEIAEEIKQAYKELSQRFGQEEVYVAVRSSATAEDLPEASFAGQQETYLDVLGADDVIDKVKRCWASLWTARATFYRAKQGFDHSKVYLSAVVQKMVNSEKSGVMFTANPVTNNRNEIMINASWGLGEAVVSGAVTPDEYIVEKGTWKIKEKVIAKKEVMVIRNPETGRGTVMVKVAEYLGPEWVEKQVLTDEQIIEVAKMGQKIEDHYGWPQDIEWAYDKDDGKLYIVQSRPITTLKEEATAEEAEEVEEAEVILKGLGASPGIGAGRVVVIF…
2		TRUE	PFDSM3638_01020	enolase	46.8062	4.9826	1	1524.9 (M.score:1524.9)	21	54.186	1.15954	2	MENPYEIVGVVAREILDSRGNPTVEVDVYTHVGMGRAAVPSGASTGTHEALELRDGGKRYHGKGVRRAVENVNKIIAPELIGMDVRWQREIDALLLELDGTENKSNVGANAILAVSLAVAKAAANSLELPLYQYLGGVNAYVLPVPLSNVINGGVHAGNDLDFQEFMIMPIGADSFREAIRWVSETYHVLKKVIMEKYGKNAVNVGDEGGFAPPMKEVTEPLDVLIKAIEEAGYKPGDEIALALDVASSELFNEETGKYVVGGKEYDRGELLELYKDLTSTYPIVSIEDPFHEEDWEGFVMITKELGHKVQIVGDDLFVTNPKRLRKGIELGAANALLLKVNQIGTLSEAMDAAFTAFRAGYGVIVSHRSGETEDATIADLAVALNAGQIKTGAPARSD…
3		TRUE	PFDSM3638_07050	DNA-binding protein	79.36	4.75616	1	790.8 (M.score:790.8)	14	28.6525	1.32299	3	MKKGLLAILLVGVMVLGTFGSGCIGGGTQTQTQTPTETGSPTQTTTPSGVTQAILELGKVTVVDTGTAIVVVGPKGEKPSVSIPSGKKVITVTYVVDEQNTPSVKELMEQGQGFGAINPAFFRDTNVDALVIAARRETNPEVRTEIFKALYILGNYYVPEVILGQNRQLRVYWDWVKGRYYHPTLPERYDLLWEDPNAPVVDTGIGSYKNDPETYVIATIGWPESFDPAWTYETFGWEIWHEIGDTLVTYWKEETEQVTPDLAVAWAHNKEGTEWYFVIRGGVKAYDPWNDKTYPIDATDVVFTFWRVARLGHSVSWMVTEFMNVSASQALTEEEFNNYVKNNPLIAEYNGKTAEIKSLQDLLNFFGYNGETAGVFKLVLPHPYAAVLNIVADPFLSVV…
4		TRUE	PFDSM3638_03360	methylmalonyl-CoA decarboxylase subunit alpha	57.0757	6.21093	1	737.7 (M.score:737.7)	13	30.6513	1.3849	4	MSMEEKVKDLYERKKKIMQMGGEEAIKKQHDKGKLTARERIELLLDPGSFVEIGMFVKHRATEFGMDKRELPADGVITGYGTIDGRLVFVYAQDFTVMGGSLGEMHAMKIKRIMELALEAGAPVIGLNDSGGARIQEGVDSLKGYGEIFKMNTILSGVVPQITAIMGPCAGGAVYSPAIGDFILMVDNPSTFMFITGPQVVKAVTGVEVSPVQLGGAMVHAQKSGQAHLIGKSDEEVIMLIKKLLSYLPSNNMEKPPKIKPKDEPFRRTPELYDIVPDDPNKGYDVRQVIYAIVDRDENGNPDFLELQPYFAPNAVIGFGRINGQPVGIVANNPIHLAGVLDIDSSDKIARFVRFCDAFNIPIVTLVDVPGYLPGVDQESRGIIRHGAKVLYAYAEATV…
5		TRUE	PFDSM3638_07005	S-layer protein	65.6784	4.37655	1	675.6 (M.score:675.6)	9	19.3388	0.861326	5	MKVKKIAALAVGAAVAGATLGFASAQGEVPEIPKDFFVKDGKPNVKIVVGSEGAAMDVVSAADIAAAIGSLLYTEKDVEVTDATVVARKDVTEPIEKIPVFDNYDTNTAHKYKVGDNLKDVPAWWNGSDFVANFSTSVWNDGVYDKAVEIRIDNIGSVGSYDLAANLTLKGIALDGITDSEVDVIDDFEDFTVNVSTVVANISLVVYNYTLKGQPTVDKITKDETIPEVNLITNLFLDNSTLAKFYPDYDGYTIEGVKVLKSGVGEGETLKILDNEYPIVFIGKDIQETACGDCFTYGKDWGEDYYNQGETYNFGDYKVTILDIDVARDKAFIKVESPSGDTETTTLAVGGTEAQTFFDGGIRIQIKDTFVGISGTNAVKLHVWTDLKTVKSGDEIMPG…
6		TRUE	PFDSM3638_08940	serine hydroxymethyltransferase	47.9564	5.85226	1	646.1 (M.score:646.1)	11	34.192	1.40345	6	MTYKEYRDKVLNFIEEHEKWRSHTINLIASENITSPSVNRAVASGFMHKYAEGWPKQRYYQGCKYVDEVELIGVELFTKLFKSDYADLRPISGTNANQAVFFGLGQPGDKVIVLHTSHGGHISHMPFGAAGMRGLEVHTWPFDFESFNIDVDKAEKMIRELEPKIVMFGGSLFPFPHPVKELAPVAKEVGAFVVYDAAHVLGLIAGGEFQDPLREGADIMTASTHKTFPGPQGGVILYKKFADDETIAKLQWAIFPGVVSNHHLHHMAGKVITAAEMLEYGEAYAKQIVKNAKALAEALAEEGFKVIGEDQGYTKSHQVIVDVSDLHPAGGGWAAPLLEEAGIILNKNLLPWDPLEKVNEPSGLRIGVQEMTRVGMMEDEMREIAHFIKRVLIDKEDPK…
7		TRUE	PFDSM3638_06020	aldehyde ferredoxin oxidoreductase	68.7302	6.01814	1	564.9 (M.score:564.9)	12	23.4249	1.19516	7	MYGWWGRILRVNLTTGEVKVQEYPEEVAKKFIGGRGLAAWILWNEARGVEPLSPENKLIFAAGPFNGLPTPSGGKLVVAAKSPLTGGYGDGNLGTMASVHLRRAGYDALVVEGKAKKPVYIYIEDDNVSILSAEGLWGKTTFETERELKEIHGKNVGVLTIGPAGENLVKYAVVISQEGRAAGRPGMGAVMGSKKLKAVVIRGTKEIPVADKEELKKLSQEAYNEILNSPGYPFWKRQGTMAAVEWCNTNYALPTRNFSDGYFEFARSIDGYTMEGMKVQQRGCPYCNMPCGNVVLDAEGQESELDYENVALLGSNLGIGKLNEVSVLNRIADEMGMDTISLGVSIAHVMEAVERGILKEGPTFGDFKGAKQLALDIAYRKGELGNLAAEGVKAMAEKL…
8		TRUE	PFDSM3638_09940	thermosome subunit	59.9438	4.89907	1	553.8 (M.score:553.8)	11	24.9545	1.10063	8	MAQLAGQPILILPEGTQRYVGRDAQRMNILAARIVAETIRTTLGPKGMDKMLVDSLGDIVITNDGATILDEMDIQHPAAKMMVEVAKTQDKEAGDGTTTAVVIAGELLRKAEELLDQNIHPSIIIKGYTLAAQKAQEILENIAKEVKPDDEEILLKAAMTSITGKAAEEEREYLAKLAVEAVKLVAEKEDGKYKVDIDNIKLEKKEGGSVRDTQLIRGVVIDKEVVHPGMPKRVEKAKIALINDALEVKETETDAEIRITSPEQLQAFLEQEERMLREMVEKIKEVGANVVFVQKGIDDLAQHYLAKYGIMAVRRVKKSDMEKLAKATGAKIVTNIRDLTPEDLGYAELVEERKVAGESMIFVEGCQNPKAVTILIRGGTEHVVDEVERALEDAIKVVK…
9		TRUE	PFDSM3638_06325	methionine synthase	39.2905	5.92222	1	495.4 (M.score:495.4)	9	28.9941	0.809162	9	MELPILPTSVIGSYPKPRWLLRMYKLRELGKIPEEDFKEAVRDASISVLREHERAGIDIPWDGEMGRSEMTEYFTSKIKGFKFYGPVRVWGNAYFNKAAAVDKLEYEEPLVLDEFLWVKENTTREIVKIPITGPYTIAEWSFNEYYPDKESFVMDLAEIINKELKVLEKHGAKFVQLDEPAMLNHPSEVPLAVDAINRAVKGIKMKVGLHVCYSNYNLLADYFDEIKVTQFALEFANRNFRDMDFLKKLSNKELGFGVVDVHNPRVESVEEIRQAIKKVFTYLEPEWVYINPDCGLKLLDRKIAYQKLVNMVQAVRGVRKELEKEGKTTIEFRTLKDI
10		TRUE	PFDSM3638_02745	GTPase	50.7244	5.97445	1	473.2 (M.score:473.2)	9	26.3393	2.42479	10	MAEKKRRRVVILGAAGRDFHNFNVFFRDNPDYEVVAFTATQIPDIEGRIYPPELAGELYPNGIPILPEDDLEKIIKEHDVDIVVFAYSDVSHEHVMHLASRAHSAGADFWLLGPKSTMLKSSKPVVAVTAVRTGCGKSQTSRKVAQILQEMGFKVVAVRHPMPYGDLRKQVVQRFATFEDLDRYECTIEEREEYEPYLERGMVVYAGVDYEKILREAEKEADIILWDGGNNDFPFFEPDLWIVVTDPHRPGHELTHHPGETNFRSADVIIINKIDTAPPENIQKIRENIEKINPNAIVIEAASPIFVDKPELIKGKRVLVVEDGPTLTHGGMSFGAGYIAAKKFGAKEIVDPRPYAVGSIIETYKKYPHLSNILPAMGYGKKQIKELEETINRADADVV…
11		TRUE	PFDSM3638_09730	amylopullulanase	153.692	4.65351	1	467.7 (M.score:467.7)	8	7.38007	1.79094	11	MSRKLSLLLVFLIFGSMLGANNIVKAEEPKPLNVIIVWHQHQPYYYDPVQGIYTRPWVRLHAANNYWKMAHYLTEFPDIHVTIDLSGSLIAQLADYMNGAKDIYQIISEKIANGEPLTYDEKWFMLQAPGGFFDHTIPWNGEPVTDENGNPIRDFWDRYTELKDKMLAAKQKYANLPLEEQKVAVTNEFTEQDYIDLAVLFNLAWIDYNYIISTPELKALYDKVDEGGYTREDLKTVLYHQMWLLNNTFKEHEKINLLLGNGNVEVTVVPYAHPIGPILNDFGWSEDFDAHVKKAHELYKKYLGGGVATPRGGWAAESALNDKTLEILAENGWQWVMTDQMVLERMGIPYSIENYYRPWVAEFNGKKIYLFPRNHDLSDRVGFRYSGMNQYEAVEDFIN…
12		TRUE	PFDSM3638_09460	DNA-binding protein Alba	10.3786	8.00889	1	344.1 (M.score:344.1)	6	56.9892	0.858359	12	MAEEHVVYIGKKPVMNYVLAVITQFNEGAKEVSIKARGRAISRAVDVAEIVRNRFLKDTVDIKEIKIGTEELPTADGRTTNTSTIEIVLERKV
13		TRUE	PFDSM3638_01690	aldehyde ferredoxin oxidoreductase	66.589	5.67324	1	343.6 (M.score:343.6)	7	16.1983	1.301	13	MYGNWGRFIRVNLSTGDIKVEEYDEELAKKWLGSRGLAIYLLLKEMDPTVDPLSPENKLIIAAGPLTGTSAPTGGRYNVVTKSPLTGFITMANSGGYFGAELKFAGYDAIVVEGKAEKPVYIYIKDEHIEIRDASHIWGKKVSETEATIRKEVGSEKVKIASIGPAGENLVKFAAIMNDGHRAAGRGGVGAVMGSKNLKAIAVEGSKTVPIADKQKFMLVVREKVNKLRNDPVAGGGLPKYGTAVLVNIINENGLYPVKNFQTGVYPYAYEQSGEAMAAKYLVRNKPCYACPIGCGRVNRLPTVGETEGPEYESVWALGANLGINDLASIIEANHMCDELGLDTISTGGTLATAMELYEKGHIKDEELGDAPPFRWGNTEVLHYYIEKIAKREGFGDKL…
14		TRUE	PFDSM3638_10150	elongation factor EF-2	82.2029	6.27341	1	331.6 (M.score:331.6)	7	10.1093	1.21735	14	MGRREEMIAKIKELMLQPERIRNIGIAAHIDHGKTTLSDNLLAGAGMISEELAGKQLVLDFDEQEQARGITINAANVSMVHNYEGKDYLINLIDTPGHVDFGGDVTRAMRAIDGVIIVVDAVEGVMPQTETVVRQALREYVKPVLFINKVDRLIRELKLTPQQMMERFSKIIMDVNRLIQRYAPEEYKKKWMVRVEDGSVAFGSAYYNWALSVPFMQRTGVKFNEIIDLTLKGDNKTLRQRAPLHVVVLDMVVRHLPSPIEAQKYRIPHLWQGDINSKIGQAMLNCDPKGKMVMVITKIIIDKHAGEVATGRVWSGTVRSGQEVYLINSKRKGRIQQVGIYMGPERINMEAVPAGNIVAVTGLRDAMAGETVAEEQIEPFEALHYVSEPVVTVAIEAKN…
15		TRUE	PFDSM3638_06875	translation elongation factor EF-1 subunitalpha	47.6053	8.68736	1	328.2 (M.score:328.2)	5	16.3551	1.79434	15	MPKDKPHVNIVFIGHVDHGKSTTIGRLLYDTGNIPEQIIKKFEEMGEKGKSFKFAWVMDRLKEERERGITIDVAHTKFETPHRYITIIDAPGHRDFVKNMITGASQADAAVLVVAATDGVMPQTKEHAFLARTLGIKHIIVAINKMDMVNYNQKRFEEVKAQVEKLLKMLGYKDFPVIPISAWEGENVVKKSDKMPWYNGPTLIEALDQIPEPEKPVDKPLRIPIQDVYSIKGVGTVPVGRVETGKLRVGEVVIFEPASTIFHKPIQGEVKSIEMHHEPLEEALPGDNIGFNVRGVSKNDIKRGDVAGHTTNPPTVVRTKDTFKAQIIVLNHPTAITVGYSPVLHAHTAQVPVRFEQLLAKLDPKTGNIVEENPQFIKTGDAAIVILRPMKPVVLEPVK…
16		TRUE	PFDSM3638_05725	proteasome assembly chaperone family protein	29.9675	4.87974	1	316.6 (M.score:316.6)	7	26.2172	0.745723	16	MKETTIVVYERPDIYDPIFIEGLPGIGLVGKLAAEHLIQELKAKKFAELYSPHFMHQVLIRKNSVVELMKNEFYYWKSPDDEHRDLIIVTGDTQVPPTDSYGHFEVAGKMLDFVQEFGTREIITMGGYQVPEIQGEPRVLAAVTHEDLIEYYKSKLEGCSVEVIWREDEGGAIVGAAGLLLGIGKLRGMFGISLLGESLGYIVDAKAAKAVLSAVTKILGLEIDMTALDERAKETEEILRKVEEMQRAMMEQVTPKLPHEEEDRGYL
17		TRUE	PFDSM3638_01370	pyrolysin	154.378	4.45794	1	299.0 (M.score:299.0)	6	5.22175	0.933101	17	MNKKGLTVLFIAIMLLSVVPVHFVSAGTPPVSSENSTTSILPNQQVVTKEVSQAALNAIMKGQPNMVLIIKTKEGKLEEAKTELEKLGAEILDENRVLNMLLVKIKPEKVKELNYISSLEKAWLNREVKLSPPIVEKDVKTKEPSLEPKMYNSTWVINALQFIQEFGYDGSGVVVAVLDTGVDPNHPFLSITPDGRRKIIEWKDFTDEGFVDTSFSFSKVVNGTLIINTTFQVASGLTLNESTGLMEYVVKTVYVSNVTIGNITSANGIYHFGLLPERYFDLNFDGDQEDFYPVLLVNSTGNGYDIAYVDTDLDYDFTDEVPLGQYNVTYDVAVFSYYYGPLNYVLAEIDPNGEYAVFGWDGHGHGTHVAGTVAGYDSNNDAWDWLSMYSGEWEVFSRL…
18		TRUE	PFDSM3638_00420	hypothetical protein	36.6828	4.4966	1	295.9 (M.score:295.9)	5	18.9873	1.95375	18	MTSEDIINALKAGNIEKAKELLTKEIDRLTDEELREVLEVAEEVAKEKRDLELYKLVVYYYAEFFGISKLHEFEEFARKFETKGLLHVADLYSLLGYPEKALEIYEGVLAEEKRPEIVGEVYYSIAAIYEELQEYEKAIEFIRKAIEEFKAANAKRKELQARVYEGYLLYESGDKVKAKEILAKLLAEVEDKELIAQIHLAFEEMFEDEENYEAAFHECLYAMINSKDSDFFEIAFDGLVDLIWQAIIDDSFEEIYNSMPMFKVAFPELSDFFEGVRLIALYKDGKAGREDVSAILDRIKDERLLSILEFLGEAEL
19		TRUE	PFDSM3638_09360	peptidase M42	38.1899	5.25892	1	292.6 (M.score:292.6)	5	17.9191	1.54265	19	MVDWELMKKIIESPGVSGYEHLGIRDLVVDILKDVADEVKIDKLGNVIAHFKGSAPKVMVAAHMDKIGLMVNHIDKDGYLRVVPIGGVLPETLIAQKIRFFTEKGERYGVVGVLPPHLRREAKDQGGKIDWDSIIVDVGASSREEAEEMGFRIGTIGEFAPNFTRLSEHRFATPYLDDRICLYAMIEAARQLGEHEADIYIVASVQEEIGLRGARVASFAIDPEVGIAMDVTFAKQPNDKGKIVPELGKGPVMDVGPNINPKLRQFADEVAKKYEIPLQVEPSPRPTGTDANVMQINREGVATAVLSIPIRYMHSQVELADARDVDNTIKLAKALLEELKPMDFTP
20		TRUE	PFDSM3638_06320	5-methyltetrahydropteroyltriglutamate--homocysteine methyltransferase	35.451	5.20947	1	288.2 (M.score:288.2)	5	18.7702	1.57548	20	MIVPALIGSLPRPIGLAKKLEQYYIGRLDERKLEEAYREYTRRAFEKLRDAKIKVITDGLYRWDDIFNPFIRFIDGIEVNGLFKFYENNFFYRSPVVRGEIALKENPIPEWISIAQEIKEDVYPEATLKAVLPGPVTLAYHSINEYYKTLTDLAEAYAQVIGELIKELDVKIVELQEPSLAAEISEATKNIEDRVDKEVAKNIIEDLGRIKKLWVVTYFGTPQVLPEGVILNVDLIEGSVPEEYSGEIGLGIVDARTTKMERADRLRDKIRKYLAKFETIYVTPNTLLDFLPESVAWKKLRLLGRLGGE
21		TRUE	PFDSM3638_06270	ribose-5-phosphate isomerase RpiA	25.0461	4.46104	1	272.0 (M.score:272.0)	4	24.8908	1.07538	21	MNVEEMKKAVARAALEFIEDDMVVGLGTGSTTAYFIRYLGEMIEKGKVEDIYGVPTSYQAKILAMESGVPVLSLDQVDAIDIAVDGADEVDPNLNLIKGRGAALTMEKIIEYRAGTFIVLVDESKLVDYLCQKMPVPIEVIPAAWKAILEELSIFNAKAELRMGVKKDGPVVTENGNFIIDAKFPRIDDPLDMEIELNTIPGVVENGIFADIADIVLVGTKEGVKRLER
22		TRUE	PFDSM3638_07795	peptidase M42	38.5593	5.71233	1	264.6 (M.score:264.6)	5	17.2414	1.13837	22	MVDYELLKKVVEAPGVSGYEFMGIRDVVIEEIKDYVDEVNVDKLGNVIAHKKGEGPKVMIAAHMDQIGLMVTHIEKNGFLRVAPIGGIDPRTLIAQRFKVWIDKGKFIYGVGGSVPPHIQKPEDRKKAPDWDQIFIDIGAESKEEAEELGVKIGTIVTWDGRLERLGKHRFVSIAFDDRIAVYTLIETARQLQDTKADIYFVATVQEEVGLRGARTSAFGINPDYGFAIDVTIAADVPGTPEHKQVTQLGKGTAIKIMDRSVICHPTIVRWMEELAKKYEIPYQWDILLGGGTDAGAIHLTRAGVPTGAVSIPARYIHSNAEVVDERDVDASVKLMVKVLEHIHELKI
23		TRUE	PFDSM3638_05530	homoserine dehydrogenase	34.9765	4.9576	1	249.4 (M.score:249.4)	5	19.375	2.71839	23	MKEVKISIFGFGTVGRALAEIVAENSEVYGIKLKVVSITDRSGTLWGDFDLLEAKEVKEATGKISNIGDYEVYYLKPEEIIEEIRPDIFVDVSSWDDAARVYEFALKEGVSVVTSNKPPIAESYDKLLKASQEGNAGLFFEATVMAGTPIIGLLRENLLGEKIEEIKAVVNASTTFILTRMEQGKTFEEAFNEAKSLGVLEEDPSKDIDGIDAFYKAKILHWVSYGAPPEFEERVGIREVKDARNVRLVAQVSEGRISVKPIKLPENSPLLVEGVQNAAIIKTDNLGEVVLKGPGGGGRVTASGVFTDIIKAALRFPKAR
24		TRUE	PFDSM3638_07930	proteasome endopeptidase complex, archaeal,alpha subunit	28.9909	5.09432	1	243.9 (M.score:243.9)	5	20.7692	0.624279	24	MAFVPPQAGYDRAITVFSPDGRLFQVNYAREAVKRGATAVGVKCGEGVVLAVEKRITSRLIEPDSYEKIFQIDDHIAAASSGIIADARVLVNRARLEAQIYRLTYGEPAPVSVIVKKICDLKQMHTQYGGVRPFGAALLMAGINDRPELYETDPSGAYFAWKAVAIGSGRNTAMAIFEEKYRDDMNLEDAIKLALMALAKTMENPSADNIEVAVITVKDKKFRKLTRDEIEKYLSEVLKEVEEEEVKEKEEDYSELDSNY
25		TRUE	PFDSM3638_04980	phenylalanine--tRNA ligase subunit beta	63.9232	4.88134	1	241.5 (M.score:241.5)	4	10.9712	2.51233	25	MPKFDVAKSDLERLVGREFSVEEWEDLVLYAKCELDDVWEEDGKIYFKLDSKDTNRPDLWSAEGVARQIRWALGLAKGLPKYEVEESDVVVYVDKKLRNIRPYGVYAVVEGLKLDEEALSQLIQLQEKVALTYGRRRREVAIGIFDFDKVKPPIYYRAAEKTEKFVPLGYSEEMTLEEILEKHEKGREYGHLIRDKPYYPLLVDSEGNVLSMPPIINSELTGRVTTETKNVFVDVTGWDLRKVMLALNVIVTALAERGGKIKRVKVIYPDFEITTPDLTPKEFEVSFEYIRKLSGLELSNEEIKELLERMMYEVEILSENKAKVKYPAFRDDIMHTRDVLEDVLIAYGYNNIDPEEPKLAVQGRGDPFKDFEDAIRDLMVGFGLQEVMTFNLTSKEVQF…
26		TRUE	PFDSM3638_07545	30S ribosomal protein S19e	17.3515	9.69352	1	235.6 (M.score:235.6)	5	39.3333	0.964717	26	MATVYDVPGDLLVERVAQRLKEIPEIKPPEWAPFVKTGRHKERLPEQEDWWYYRVASILRRVYLDGPVGIERLRTYYGGRKNRGHAPEKFYKAGGSIIRKALQQLEAAGFVEKVPGKGRVITPKGRSFLDKIATELKKELEEIIPELKKY
27		TRUE	PFDSM3638_03005	aspartate carbamoyltransferase	34.7025	6.12078	1	235.0 (M.score:235.0)	5	20.4545	3.09277	27	MDWKGRDVISIRDFSKEDIEIVLSTAERLEKELKEKGQLEYARGKILATLFFEPSTRTRLSFESAMHRLGGAVIGFAEASTSSVKKGESLADTIKTVEQYSDVIVIRHPKEGAARLAAEVAEIPVINAGDGSNQHPTQTLLDLYTIRKEFGKIDGLKIGLLGDLKYGRTVHSLAEALAYYDVELYLISPELLRMPRHIVEELREKGVTVYETSDLMSVIGELDVLYVTRIQKERFPDEQEYLKVRGSYQVNLQVLSKAKETLKVMHPLPRVDEIHPEVDKTKHAIYFKQVFNGIPVRMALLGLVLGVI
28		TRUE	PFDSM3638_09865	phosphoglycerate mutase	45.2854	6.04794	1	225.2 (M.score:225.2)	5	15.0852	1.42788	28	MKQRKGVLIILDGLGDRPIKELGGKTPLEYANTPTMDYLAKIGILGQQDPIKPGQPAGSDTAHLSIFGYDPYKSYRGRGYFEALGVGLELDEDDLAFRVNFATLENGVITDRRAGRISTEEAHELAKAIQENVDIPVDFIFKGATGHRAVLVLKGMAEGYKVGENDPHEAGKPPHPFTWEDEASKKVAEILEEFVKKAHEVLDKHPINEKRRKEGKPVANYLLIRGAGTYPNIPMKFTEQWKVKAAAVVAVALVKGVAKAIGFDVYTPKGATGEYNTDEMAKARKAVELLKDYDFVFIHFKPTDAAGHDNNPKLKAELIERADRMIKYIVDHVDLEDVVIAITGDHSTPCEVMNHSGDPVPLLIAGGGVRADYTEKFGEREAMRGGLGRIRGHDIVPIM…
29		TRUE	PFDSM3638_07715	NADH oxidase	48.0409	6.07378	1	221.8 (M.score:221.8)	4	10.9589	0.90878	29	MRIVVIGSGTAGSNFALFMRKLDRKAEITVIGKEETMQYSPCALPHVISGVIEKPEDVIVFPNEFYEKQRIKLLLNTEAKKIDRERKVVVTDKGEIPYDKLVIATGSKAFVPPIKGVENEGVFTLKSLEDVRKIKEFIKKRNPKNAVVIGAGLIGLEGAEAFAKLGMKVTVVELLEHLLPTMLDKDIAKIVEENMRKYGVDFKFGVGVDEIIGDPVEKVKVGEEEIDADIVLVATGVRANVELAKEAGLEVNRGIVVNEYLQTSDPDIYAIGDCAEVIDAVTGKRTLSQLGTSAVRMAKVAAENIAGRNVKFRPVFNTAITEIFDLEIGAFGITEERAKKEEIEVVVGKFRGSTKPEYYPGGKPIVVKLIFRKEDRRLIGAQIVGGERVWGRIMTLSAL…
30		TRUE	PFDSM3638_09745	maltotriose-binding protein	48.2131	4.62275	1	220.1 (M.score:220.1)	5	16.8203	3.22744	30	MRRATYAFALLAILVLGVVASGCIGGGTTTPTQTSPATQPTTTQTPTQTETQAVECGSGKVVIWHAMQPNELEVFQSLAEEYMALCPEVEIVFEQKPNLEDALKAAIPTGQGPDLFIWAHDWIGKFAEAGLLEPIDEYVTEDLLNEFAPMAQDAMQYKGHYYALPFAAETVAIIYNKEMVSEPPKTFDEMKAIMEKYYDPANEKYGIAWPINAYFISAIAQAFGGYYFDDKTEQPGLDKPETIEGFKFFFTEIWPYMAPTGDYNTQQSIFLEGRAPMMVNGPWSINDVKKAGINFGVVPLPPIIKDGKEYWPRPYGGVKLIYFAAGIKNKDAAWKFAKWLTTSEESIKTLALELGYIPVLTKVLDDPEIKNDPVIYGFGQAVQHAYLMPKSPKMSAVWG…
31		TRUE	PFDSM3638_07110	aspartate aminotransferase family protein	50.7245	5.70112	1	216.8 (M.score:216.8)	3	8.81057	1.89331	31	MELRPNVKEIPGPKAREIIEKHHKYMATTTNDPNEYFLVIERAEGVYWIDVDGNVILDFSSGIGVLNVGLRNPRVVEAIKKQLDLVLHAAGTDYYNPYQVALAEKLVQITPGDFEKKVFLSNSGTEANEAALKIAKWSTNRKMFIAFIGAFHGRTHGTMSLTASKPVQRSRMFPTMPGVEHVPYPNPYRNPWHIDGYENPDELINRVLEYIEEYLFSHYVPAEEVAGIVFEPIQGEGGYVVPPRNFFKELKKLADKYGILLIDDEVQMGIGRTGKMWAIEHFGIAPDIITTAKALGGGIPIGATIFRKDLDFGVSGVHSNTFGGNAVAAAAALAVMEELENGLLENVQKLEPLFRERLEEMKEKYEIIGDVRGIGLAWGVEFVKDRKTKEYATKERNEV…
32		TRUE	PFDSM3638_08340	30S ribosomal protein S4	21.3246	9.98351	1	210.1 (M.score:210.1)	4	21.1111	0.961877	32	MGDPKRQRKKYETPPHPWIKERLDRERVLMDKYELKNKKELWKHETQLKNFRRRARRLLAARGKQAEIEREQLLARLKRLGLLPEDAVLDDVLSLTIEDILERRLQTIVYKKGLARTMRQARQLIVHGHIEVNGQIIRSPSYLVLKEEEDTITYARTSPFANPQHPERMMIEKAKQGGEA
33		TRUE	PFDSM3638_05305	aspartate-semialdehyde dehydrogenase	36.8705	6.12132	1	200.3 (M.score:200.3)	4	15.5689	1.8552	33	MKAAVLGATGLVGRTFVKLLSGHPWFKVSKLVASEKSAGKEYGEIVEDSPKEFRKNVIISLEEFLKDPDVDIVFNALPASISREVEEKLAQEIPVFTNARAHRYDEDVPILVPEVNMNHLGIIEVQKKNRGWDGFIVTNPNCSTAILTVSLAPLVEFGIKKVRVATMQAISGAGFSGLSAYAIHDNVIPFINGEEWKIENESKKILGKFNGERIENADFDISAIATRVPVIHGHTEAVFVELEKVNIEEIREAFDSFDPLRDYKLPSYEKPIVYSEVPQPRLHRDRGKGLTGTVGRLEKINGGVKYVTLGHNLVRGAAGGSVLNAELAYRLGYL
34		TRUE	PFDSM3638_02980	ornithine carbamoyltransferase	35.159	5.89669	1	195.7 (M.score:195.7)	3	16.1905	1.66502	34	MVVSLAGRDLLCLQDYTAEEIWTILETAKMFKIWQKIGKPHRLLEGKTLAMIFQKPSTRTRVSFEVAMAHLGGHALYLNAQDLQLRRGETIADTARVLSRYVDAIMARVYDHKDVEDLAKYATVPVINGLSDFSHPCQALADYMTIWEKKGTIKGVKVVYVGDGNNVAHSLMIAGTKLGADVVVATPEGYEPDEKVIKWAEQNAAESGGSFELLHDPVKAVKDADVIYTDVWASMGQEAEAEERRKIFRPFQVNKDLVKHAKPDYMFMHCLPAHRGEEVTDDVIDSPNSVVWDQAENRLHAQKAVLALVMGGIKF
35		TRUE	PFDSM3638_05970	rubrerythrin	38.7778	4.9387	1	192.0 (M.score:192.0)	3	9.85507	0.412235	35	MLSINPTLINRDKPYTKEELMEILRLAIIAELDAINLYEQMARYSEDENVRKILLDVAREEKAHVGEFMALLLNLDPEQVTELKGGFEEVKELTGIEAHINDNKKEESNVEYFEKLRSALLDGVNKGRSLLKHLPVTRIEGQSFRVDIIKFEDGVRVVKQEYKPIPLLKKKFYVGIRELNDGTYDVSIATKAGELLVKDEESLVIREILSTEGIKKMKLSSWDNPEEALNDLMNALQEASNASAGPFGLIINPKRYAKLLKIYEKSGKMLVEVLKEIFRGGIIVTLNIDENKVIIFANTPAVLDVVVGQDVTLQELGPEGDDVAFLVSEAIGIRIKNPEAIVVLE
36		TRUE	PFDSM3638_05560	hypothetical protein	124.812	4.20448	1	186.6 (M.score:186.6)	4	4.32862	2.88463	36	MRRNAQVFAMVLLLVLSGIPKALALYTPTPFSIDGNLEEWIKADAIAYGRDSGLPGANLDKLYIAWDDNYLYIAIKTNNTQSWDLAYGIGIDVDPGSGNGYTGDSDAWGRKIAFGNNYAIDYEIYFWWSGGSGITADNFINWTGSGWDYKSISDVGGSFAYTGDTSQGLQTLEIAIPWDALGGITRKFAIIAWIAGGDGSSAVDSLPVDDTIVDSDNEWVDQDVFTNLSVIMLSPKNIDGSLDDWADYEKVGSSLPSGYPGADLESLYVSWDSNYLYIAIKTNNTASWDVAYGIGIDVDPGSGNGYTGDTDAWGRKIGFQGFAVDYEIYFWWSGGSGITADNFINWTGSGWDYKSISDVGGSFAYTGDTSQGLQTLEIAIPWDALGGITRKFAIIAWIA…
37		TRUE	PFDSM3638_10345	DUF2666 domain-containing protein	28.8817	6.81078	1	185.4 (M.score:185.4)	5	17.4603	2.73931	37	MIERILEFTAKHEEWIVGENVEDFTNENIAMFLSRVSNTVSSKIPGYLGEKIDVNGLLSIKIEGSLEEKLKALISPKVSRQIGRLVMEDDKKLKKLLVEVAKAVLTREILKNELPIEFPGGKIEGLKIQPRYEEDHINFTARYGSWIVVKRMIIDEKTPLLDIARLLASINETAVNKIKDFADVDDKKIVEYFGGFKKVKKEEEIKEIVQLFREFKGNEFEVRYAAREMLSKLGLKVDVPSKNLEKYLEKAG
38		TRUE	PFDSM3638_10035	50S ribosomal protein L1	23.8372	9.78089	1	182.9 (M.score:182.9)	4	30.5556	2.09196	38	MPFDRQKIVKAVKEAKARAKPRNFTQSVEVAVNLKDIDLKRPENRFKLEVVLPHGRGKDVKIAVIADGAVAEAARKLGLDVISSAELEEIASSPRQARKLAKKYDFFIAEAPLMPKIGRYLGRYLGPRNKMPVVVPPTLTDLTPIVEKLKKTVRIQLKNNPVVHAPVGTEKMSDEEIAENIEAVLNAIIGKLERGESQVKSVYVKTTMGPAVKIEG
39		TRUE	PFDSM3638_06620	ferredoxin-NADP reductase	30.7981	6.61681	1	178.4 (M.score:178.4)	3	13.6691	2.26567	39	MFKILRKERLAPGINLFEIESPRIAKHAKPGQFVMIRLHEKGERIPLTIADVDISKGSITIVAQEVGKTTRELGTYEAGDYILDVLGPLGKPSHIDYFGTVVMIGGGVGVAEIYPVAKAMKEKGNYVISILGFRTKDLVFWEDKLRSVSDEVIVTTNDGSYGMKGFTTHALQKLIEEGRKIDLVHAVGPAIMMKAVAELTKPYGIKTVASLNPIMVDGTGMCGACRVTVGGEVKFACVDGPEFDAHLVDWDELMNRLAYYRDLEKISLEKWERERRMV
40		TRUE	PFDSM3638_09900	tetratricopeptide repeat protein	39.2778	4.47941	1	168.8 (M.score:168.8)	3	9.58084	1.13051	40	MVEEKIKEAIKNRDCETILELLDEYLEQIEDEEKLREALKEIGEAAVECEDFDIIHEISHLYEHLGEPEKGIELYKKIVERRKGDKEKYAEALYYLAEEYEHMGMPEEALKIYQELLEIEKELGNEREIALTLANIAVVKDELGEADEAIKLMSEAKDIFEKINDTKNYHIALIDLAHFYYELGEYEKAMQIIEEVLRNPLDDEIEVHGRLVESEIHSALENYKKAALSLRNALLRSGDDEYLFETAFEAVLEFIEELYNEEKYAELKEVASLFAELFEDDTKFFFQAIEKLAEWKLGKEEAKKEFEELYNKIENEEMKEFLDELKKPKVNLSL
41		TRUE	PFDSM3638_04470	sulfhydrogenase 1 subunit alpha	48.2852	5.67303	1	165.7 (M.score:165.7)	5	12.8505	2.29982	41	MKNLYLPITIDHIARVEGKGGVEIIIGDDGVKEVKLNIIEGPRFFEAITIGKKLEEALAIYPRICSFCSAAHKLTALEAAEKAVGFVPREEIQALREVLYIGDMIESHALHLYLLVLPDYRGYSSPLKMVNEYKREIEIALKLKNLGTWMMDILGSRAIHQENAVLGGFGKLPEKSVLEKMKAELREALPLAEYTFELFAKLEQYSEVEGPITHLAVKPRGDAYGIYGDYIKASDGEEFPSEKYRDYIKEFVVEHSFAKHSHYKGRPFMVGAISRVINNADLLYGKAKELYEANKDLLKGTNPFANNLAQALEIVYFIERAIDLLDEALAKWPIKPRDEVEIKDGFGVSTTEAPRGILVYALKVENGRVSYADIITPTAFNLAMMEEHVRMMAEKHYND…
42		TRUE	PFDSM3638_09210	histone	7.40111	9.04784	1	160.9 (M.score:160.9)	2	37.3134	1.06453	42	MGELPIAPVDRLIRKAGAERVSEQAAKVLAEYLEEYAIEVAKKAVEFARHAGRKTVKVEDIKLAIKS
43		TRUE	PFDSM3638_06405	hypothetical protein	6.76168	9.04838	1	158.2 (M.score:158.2)	2	42.3729	1.31108	43	MVELLVKSKVKEFVSSIDKDMRVSPEFYEALEAEVKALIEKAVKRAQAEGRKTLYARHV
44		TRUE	PFDSM3638_08985	acetyl-CoA synthetase	25.8619	5.15852	1	152.0 (M.score:152.0)	3	18.1034	2.48795	44	MDRVAKAREIIEKAKAENRPLVEPEAKEILKLYGIPVPEFKVARNEEEAVKFSGEIGYPVVMKIVSPQIIHKSDAGGVKINIKNDEEAREAFRTIMQNARNYKPDADLWGVIIYRMLPLGREVIVGMIRDPQFGPAVMFGLGGIFVEILKDVSFRVAPITKEDALEMIREIKAYPILAGARGEKPVNIEALADIIVKVGELALELPEIKEIDINPIFAYEDSAIAVDARMIL
45		TRUE	PFDSM3638_06300	translation initiation factor IF-5A	15.4351	5.16695	1	151.6 (M.score:151.6)	3	29.7101	0.858619	45	MGDKTKVQVSKLKPGRYIIIDDEPCRIVNITVSSPGKHGSAKARIEAVGIFDGKVRSIVKPTSAEVDVPIIDKRTAQVIAVTPDTVQIMDMETYEMFEVPLDTGVEEEIKDKIKEGINVEYWETLGRIKIMRIKGEEE
46		TRUE	PFDSM3638_08285	30S ribosomal protein S2	22.9924	9.298	1	148.4 (M.score:148.4)	3	17.8218	1.33719	46	MADEYLVPLDQYLAAGVHIGTQQKTKDMKKFIYRVRQDGLYVLDVRKTDERLKVAGKFLAKFEPQSILAVSVRLYGQKPVKKFGEVTGARAIPGRFLPGTMTNPAVKNFFEPDVLIVTDPRADHQAMREAVEIGIPIVALVDTENLLSYVDLAIPTNNKGRKALALIYWILAREILYNRGEIQSREDFKIPVEEFEMKIVRR
47		TRUE	PFDSM3638_00925	glucose-6-phosphate isomerase	21.4629	5.14634	1	147.8 (M.score:147.8)	3	18.5185	0.839291	47	MYKEPFGVKVDFETGIIEGAKKSVRRLSDMEGYFVDERAWKELVEKEDPVVYEVYAVEQEEKEGDLNFATTVLYPGKVGKEFFFTKGHFHAKLDRAEVYVALKGKGGMLLQTPEGDAKWISMEPGTVVYVPPYWAHRTVNIGDEPFIFLAIYPADAGHDYGTIAEKGFSKIVIEENGEVKVVDNPRWKK
48		TRUE	PFDSM3638_07730	DUF3417 domain-containing protein	97.6437	5.82833	1	141.3 (M.score:141.3)	3	3.4565	1.76055	48	MVKVENSIKKKIEKKLPENLKKLAELAYNYWWSWDDKAMKLWQRIDEDHWREYKNPVKLLLDVPESRLKELSRDDTFLDLYELVIERFNSYLNPETTWFSTNYPKWDKPIVYLCMEYGISKSLPIYSGGLGILAGDHLKTASDLGLPLIGIGLLYKHGYFKQEIDKNGRQIEIFPEYNISEMPIRQVLNEDGSPLLIDVPMENRIVKARVFLVKVGRVDLYLLDTDVPENNEEDRKICDYLYNAEPDKRIKQEILLGIGGMRLLKALGIEPGVIHLNEGHPAFANFERIRWLMDEGLSFEEALEVVRGTSVFTTHTPVPAGHDVFPADFVREKLAKFFEGLPAEKFLDLGRRFPGDSNFNMTVLSIKTSNFVNGVSKLHAKITREMWADLWKGVPIDEI…
49		TRUE	PFDSM3638_07765	small nuclear ribonucleoprotein	8.43766	6.06492	1	139.2 (M.score:139.2)	3	44.7368	0.70515	49	MAERPLDVIHKSLDKDVLVILKKGFEFRGKLIGYDIHLNVVLANAELLQDGEVVKKYGKIVIRGDNVLAISPTEEG
50		TRUE	PFDSM3638_04880	pyruvate ferredoxin oxidoreductase	20.0089	5.42661	1	137.2 (M.score:137.2)	2	16.7568	0.842732	50	MIEVRFHGRGGQGAVTAANILAEAAFLEGKYVQAFPFFGVERRGAPVTAFTRIDNKPIRIKTQIYEPDVVVVLDPSLLDAVDVTAGLKDEGIVIVNTEKSKEEVLEKLKKKPKKLAIVDATTIALEILGLPITNTAILGAVAKATGLVKIESIEEAIKDTFSGELGEKNARAAREAYEKTEVFEL
51		TRUE	PFDSM3638_05625	type I-B CRISPR-associated proteinCas7/Cst2/DevR	39.8459	6.12634	1	134.8 (M.score:134.8)	4	11.6809	1.0856	51	MKFAAGFVLIDAPHSALNMLGIDENLPDRNVTRVKTLRRGGNRYVYVSPQAWRYWWRTTLKEYFKWELSPLFREEKQVFTAANPIKYPDDDVFGYMRAYKKNNVNVTVTRVSPLKNTPLISVLPDRSSLTIDEGYASRHEGDPVPYSQEFYSTVLKGAFSLDLDLVGRFTTKNKAGYKNLLTRSDIPKKGKAGEIVKEIEELEKLAREIGVEIKEEEWIMPKEVRKKRAVETIKALRYLTGGAKQTQYHTDVTPKFFLGIIVNGGINPFISGIVREEKGEIILDAEALATRLEDFSEIIDSELFLGYDKGFVKELGLDIEALKSAVSIEVMEGKVGEVIESFAEEAGKYYL
52		TRUE	PFDSM3638_06390	superoxide reductase	14.3153	5.67036	1	126.9 (M.score:126.9)	3	17.7419	1.62432	52	MISETIRSGDWKGEKHVPVIEYEREGELVKVKVQVGKEIPHPNTTEHHIRYIELYFLPEGENFVYQVGRVEFTAHGESVNGPNTSDVYTEPIAYFVLKTKKKGKLYALSYCNIHGLWENEVTLE
53		TRUE	PFDSM3638_09725	ABC transporter ATP-binding protein	41.308	6.9444	1	117.8 (M.score:117.8)	2	7.83784	1.03591	53	MAGVRLVGVWKQFGSFTAVKDLTLEVRDGEFLVLLGPSGCGKTTTLRMIAGLEEPTKGQIYIGDKLVADPEKGVFVPPKDRDIAMVFQSYALYPHMTVYENIAFPLKLRKVPKQEIDKRVREVAEMLGLTELLNRKPRELSGGQRQRVALGRAIVRRPQVFLMDEPLSNLDAKLRVKMRAELKKLQKQLGVTTIYVTHDQVEAMTMGDRIAVMNQGVLQQVGTPEEVYEKPANTFVAGFIGSPPMNFLDATITEDGFLDFGEFRLKLLPDQFEVLQDYVGKEVIFGIRPEDIYDALFAQVKIPGENMARGVVDIIENLGGEKIVHISIGGLIVTAKFPGESRVKEGDEIDIVFDMKKIHIFNKKTGKAIL
54		TRUE	PFDSM3638_02265	carboxypeptidase M32	59.0057	5.54005	1	111.7 (M.score:111.7)	2	4.40882	1.84569	54	MEEVFQNETIKQILAKYRRIWAIGHAQSVLGWDLEVNMPKEGILERSVAQGELSVLSHELLLHPEFVNLVEKAKGLENLNEYERGIVRVLDRSIRIARAFPPEFIREVSETTSLATKAWEEAKAKDDFSKFEPWLDKIISLAKRAAEYLGYEEEPYDALLDLYEEGLRTRDVEKMFEVLEKKLKPLLDKILEEGKVPREHPLEKEKYEREWMERVNLWILQKFGFPLGTRARLDVSAHPFTTEFGIRDVRITTRYEGYDFRRTILSTVHEFGHALYELQQDERFMFTPIAGGVSLGIHESQSRFWENIIGRSKEFVELIYPVLKENLPFMSNYTPEDVYLYFNIVRPDFIRTEADVVTYNFHILLRFKLERLMVSEEIKAKDLPEMWNDEMERLLGIRP…
55		TRUE	PFDSM3638_00120	phosphoribosyltransferase	17.5506	6.16906	1	110.3 (M.score:110.3)	3	24.8366	0.974222	55	MDKVYLTWWQVDRAIFALAEKLREYKPDVIVGIARGGLIPAVRLSHILGDIPLKVIDVKFYKGIEERGEKPVITIPIHGDLKDKKVVIVDDVSDTGKTLEVVIEEVKKLGAKEVKVACLAMKPWTSVVPDYYVFRTEKWIVFPWEEFPVIERE
56		TRUE	PFDSM3638_08135	septum site-determining protein MinD	27.4402	5.72334	1	106.5 (M.score:106.5)	2	10.4247	1.3969	56	MEGRSIVFASGKGGTGKTTTVANIGVALAQFGKEVILIDADITMANLSLILGMEDIPITLHDVLAGEAELKDAIYEGPAGVKVIPGGLSLEKVKKARPERLRELIKEISQMGDFILIDAPAGLELTSVTALLIGKELIIVTNPEISAITDSLKTKLVAEKLGTLPLGAILNRVTSEKTELSKEEIEAILEVPVIGIVPEDPEVKRASAYGVPLVIKNPTSPAAIAYKQIAAKLAGIKWTPPEPESPVKRIFKALFGGKR
57		TRUE	PFDSM3638_06400	rubrerythrin	19.4878	5.65327	1	105.2 (M.score:105.2)	2	13.4503	0.550729	57	MVVKRTMTKKFLEEAFAGESMAHMRYLIFAEKAEQEGFPNIAKLFRAIAYAEFVHAKNHFIALGKLGKTPENLQMGIEGETFEVEEMYPVYNKAAEFQGEKEAVRTTHYALEAEKIHAELYRKAKEKAEKGEDIEIKKVYICPICGYTAVDEAPEYCPVCGAPKEKFVVFE
[truncated: 92 more rows]

## Sheet: Strep-tag only 2
Table S2. Mass spectrometry output of replicate 2 of Strep-peptide only co-purified proteins.
Row	User Flag	OK	Accession	Protein	MW [kDa]	pI	#Alt. Proteins	Scores	#Peptides	SC [%]	RMS90 [ppm]	Rank	Sequence
[truncated: 520 more rows]

## Sheet: Strep-tag only 3
Table S2. Mass spectrometry output of replicate 3 of Strep-peptide only co-purified proteins.
[truncated: 627 more rows]

## Sheet: MS untreated
Table S2. SmAP1 associated proteins using untreated crude extracts as input for co-purification. Classifications of proteins according to the UniProt Knowledgebase and of corresponding genes using arCOGs are shown.
[truncated: 97 more rows]

[truncated: 3 more sheets: MS treated, Enrichment analysis untreated, Enrichment analysis treated]
