# Supplementary material for: The archaeal Lsm protein from Pyrococcus furiosus binds co-transcriptionally to poly(U)-rich target RNAs
Source: publisher site journal article supplement (doi:10.1515/hsz-2023-0215), 2023-09-14
Supplement: Supplementary file 2 [file j_hsz-2023-0215_suppl_003.xlsx]

## Sheet: P. furiosus strains
Table S3: Used strains, plasmids and primer sequences
Designation	Description	Reference/Source
MURPf80	P. furiosus strain with a markerless deletion of genes pdaD and PFDSM3638_09820 and harboring the plasmid pMUR435 for overexpressing C-terminally Strep-tagged SmAP1	This work
MURPf82	P. furiosus strain with a markerless deletion of genes pdaD and PFDSM3638_09820 and harboring the plasmid pMUR544 for overexpressing the Strep-tag peptide only	This work

## Sheet: E. coli strains
Table S3: Used strains, plasmids and primer sequences
Designation	Description	Source
MUR531	E. coli JW4130-1 strain (F-, Δ(araD-araB)567, ΔlacZ4787(::rrnB-3), λ-, rph-1, Δ(rhaD-rhaB)568, Δhfq-722::kan, hsdR514) harboring plasmid pMUR519 for overexpressing C-terminally Strep-tagged SmAP1	This work

## Sheet: Plasmids
Table S3: Used strains, plasmids and primer sequences
Designation	Description	Reference/Source
pMUR435	P. furiosus - E. coli shuttle vector harboring genes pdaD and PFDSM3638_09820 for complementation of genomic deletions and the Pfu smap1 gene fused with a C-terminal StrepII-tag sequence under control of the constitutive promoter of theTko gdh gene	This work
pMUR544	P. furiosus - E. coli shuttle vector harboring genes pdaD and PFDSM3638_09820 for complementation of genomic deletions and the StrepII-tag sequence under control of the constitutive promoter of theTko gdh gene	This work
pMUR519	Overexpression vector based on pPROEX HTb (Invitrogen) harboring the Pfu smap1 gene fused with a C-terminal StrepII-tag sequence	This work
pMUR652	Gene Art standard subcloning vecor pMA-RQ harboring hpyA1 promoter - PFDSM3638_05070 (partical) fusion construct	This work

## Sheet: Primers
Table S3: Used strains, plasmids and primer sequences
Description	Sequence (5´to 3´)	modification	amplified DNA
RPA_pYS13_GA_F	CCGGCTGGCGCCAAGCTTCTCTGCAGGATATCCTTCTCGCTGAGGGCATTTCATCATTTT	NA	Tko gdh promoter
pYS13_GA-R	GCGGCCGCCCTGCAGGGGCGCGCCGTCATAGCTGTTTCCTGTGTGAAATTGTTATCC	NA	Tko gdh promoter
PYS14_GA_F	TGAAATCTTTTTTAGCACTTTTCTTTTTCCTTAAATTTTCGC	NA	Pfu hpyA1 terminator region Pfu overexpression plasmid backbone pMUR433 pMUR435
pYS13_RPA_GA_R	GTTTAATCTGCGGTGTTTTGTAGGAAGATATCACCCTAGAAAAAGATAAGCCTCATAGTT	NA	Pfu hpyA1 terminator region
pYS14Expgdh_F	TCATACCACCTCATTTCGGTAATCTGCGAG	NA	Pfu overexpression plasmid backbone
GAp14PF1542FW	CTCGCAGATTACCGAAATGAGGTGGTATGAATGGCGGAAAGGCCTCTC	NA	Pfu smap1 gene
GAp14PF1542RW	TAAGGAAAAAGAAAAGTGCTAAAAAAGATTTCAACCTTCTTCTGTTGGAGAAATCGC	NA	Pfu smap1 gene
PF1542cstrep2RWP	CTTCTCGAACTGTGGGTGAGACCATGCAGAACCTTCTTCTGTTGGAGAAATCGC	5´-Phosphate	pMUR433
p14strepfw	CTTCTCGAACTGTGGGTGAGACCATGCAGATCATACCACCTCATTTCGGTAATCTGCGAG	5´-Phosphate	pMUR435
1542GApproexfor	CACACAGGAAACAGACCATGGCGGAAAGGCCTCTC	NA	Pfu smap1 gene
PF1542Strepgapproexrev	GAAAGCGGCCGCGACTAGTTCACTTCTCGAACTGTGGGTGAGACCATGCAGAACCTTCTTCTGTTGGAGAAATCGCC	NA	Pfu smap1 gene
pproexgarev	CATGGTCTGTTTCCTGTGTGAAATTG	NA	pPROEX HTb
pproextgagafor2	TGAACTAGTCGCGGCCGCTTTC	NA	pPROEX HTb
M13F-bio	GCCAGGGTTTTCCCAGTCACGA	NA	pMUR652
M13 rev (-29)	CAGGAAACAGCTATGACC	NA	pMUR652
