# Supplementary material for: The archaeal Lsm protein from Pyrococcus furiosus binds co-transcriptionally to poly(U)-rich target RNAs
Source: publisher site journal article supplement (doi:10.1515/hsz-2023-0215), 2023-09-14
Supplement: Supplementary file 3 [file j_hsz-2023-0215_suppl_004.xlsx]

## Sheet: RNA-seq statistics
Table S1. RNA-seq reads count statistics.
	raw data reads	Trimmomatic passed reads	uniquely mapped reads (whole genome)
PfuSmAP1-Strep 1	32751238	32050237	27712103
PfuSmAP1-Strep 2	38891943	38066048	32543183
PfuSmAP1-Strep 3	37811537	36731317	31665930
Strep-tag 1	32339811	23519727	20548831
Strep-tag 2	34011917	29452805	25744789
Strep-tag 3	32428091	25354449	21374675

## Sheet: homer SmAP-Strep 1
Table S1. Homer output from replicate 1 of SmAP co-purified RNAs mapped to the P. furiosus genome.
chr	start	end	strand	score	focus ratio/other	Total Tags	Background	Fold Change	p-value
CP023154	517	667	-	1084	0.934	3065	10.63	0	0.1
CP023154	1329	1479	-	876	0.937	2504	7.51	0	0.14
CP023154	8180	8330	-	1275.8	0.693	3479	5.3	0	0.08
CP023154	10798	10948	-	2358.6	0.568	6313	8.25	0	0.1
CP023154	14503	14653	-	2630.7	0.866	7506	11.5	0	0.08
CP023154	25637	25787	-	732.5	0.752	1993	4.48	0	0.11
CP023154	33016	33166	-	7628.3	0.694	21526	16.19	0	0.03
CP023154	35085	35235	-	2398.6	0.625	6366	4.02	0	0.04
CP023154	36094	36244	-	3301.7	0.837	9101	5.5	0	0.04
CP023154	41102	41252	-	2057.6	0.819	5532	7.38	0	0.07
CP023154	48082	48232	-	1143.5	0.707	3101	5.54	0	0.09
CP023154	49221	49371	-	2807.4	0.934	7811	15.44	0	0.06
CP023154	60744	60894	-	2678.2	0.587	7136	11.18	0	0.04
CP023154	66876	67026	-	1412.2	0.595	3797	8.87	0	0.07
CP023154	68912	69062	-	1426.9	0.792	3809	6.83	0	0.14
CP023154	71990	72140	-	914.8	0.806	2512	5.12	0	0.12
CP023154	72671	72821	-	1025.2	0.796	2778	5.73	0	0.11
CP023154	79882	80032	-	1194.4	0.729	3341	5.28	0	0.08
CP023154	86166	86316	-	22745.8	0.985	62813	38.28	0	0.02
CP023154	86769	86919	-	5710.9	0.518	15649	6.61	0	0.04
CP023154	103001	103151	-	3923.8	0.882	10533	12.59	0	0.05
CP023154	104281	104431	-	1463.8	0.825	4049	4.05	0	0.09
CP023154	107237	107387	-	3837.1	0.722	10891	8.46	0	0.04
CP023154	111844	111994	-	1565.5	0.913	4596	4.23	0	0.11
CP023154	118288	118438	-	1825.1	0.638	4872	9.64	0	0.07
CP023154	119124	119274	-	848.9	0.471	2470	4.9	0	0.2
CP023154	120083	120233	-	600.2	0.562	1635	4.03	0	0.14
CP023154	138949	139099	-	2757.7	0.618	7472	11.84	0	0.05
CP023154	146253	146403	-	6943.3	0.761	19561	17.19	0	0.03
CP023154	153173	153323	-	2588.1	0.806	7301	5.91	0	0.05
CP023154	153700	153850	-	5595.9	0.553	14890	14.63	0	0.05
CP023154	159394	159544	-	795.4	0.599	2112	4.99	0	0.13
CP023154	165230	165380	-	2219.2	0.755	5928	12.89	0	0.06
CP023154	165604	165754	-	870.7	0.791	2455	4.29	0	0.11
CP023154	180120	180270	-	548.6	0.752	1487	4.27	0	0.17
CP023154	186928	187078	-	585.5	0.518	1566	4.28	0	0.13
CP023154	187574	187724	-	584	0.685	1612	4.28	0	0.16
CP023154	189288	189438	-	630.4	0.514	1688	4.26	0	0.14
CP023154	193802	193952	-	727.9	0.666	2025	4.29	0	0.16
CP023154	196228	196378	-	924.6	0.517	2460	6.17	0	0.1
CP023154	197796	197946	-	1837.2	0.883	4976	14.93	0	0.08
CP023154	203814	203964	-	938.6	0.798	2525	7.99	0	0.17
CP023154	204263	204413	-	539.5	0.729	1440	4.34	0	0.17
CP023154	204859	205009	-	854.5	0.886	2284	5.78	0	0.21
CP023154	209885	210035	-	2573.4	0.765	6843	5.64	0	0.05
CP023154	210680	210830	-	4428.3	0.674	11989	10.2	0	0.03
CP023154	211396	211546	-	3017.3	0.793	8211	6.35	0	0.06
CP023154	216609	216759	-	1550.1	0.683	4176	5.73	0	0.07
CP023154	217247	217397	-	1509.8	0.582	4116	6.07	0	0.06
CP023154	222411	222561	-	1878.6	0.898	5017	13.41	0	0.08
CP023154	230216	230366	-	1984.9	0.703	5731	5.81	0	0.07
CP023154	231624	231774	-	1936.7	0.859	5354	5.39	0	0.11
CP023154	233539	233689	-	2207.9	0.744	6004	6.57	0	0.09
CP023154	239699	239849	-	1101.7	0.732	2945	6.39	0	0.09
CP023154	248256	248406	-	1192.5	0.713	3189	5.49	0	0.08
CP023154	256394	256544	-	5380.8	0.97	14069	35.81	0	0.06
CP023154	259546	259696	-	1072.3	0.553	2878	5.14	0	0.09
CP023154	267148	267298	-	1332.7	0.819	3606	10.24	0	0.08
CP023154	272502	272652	-	870.4	0.726	2369	7.61	0	0.1
CP023154	280168	280318	-	822.9	0.883	2266	6.4	0	0.13
CP023154	287248	287398	-	1724.5	0.65	4651	10.26	0	0.07
CP023154	290045	290195	-	830.4	0.425	2282	4.02	0	0.12
CP023154	296348	296498	-	974	0.484	2691	5.38	0	0.19
CP023154	299609	299759	-	758.1	0.724	2127	4.32	0	0.12
CP023154	304323	304473	-	1201.9	0.852	3274	9.12	0	0.1
CP023154	310757	310907	-	3230.9	0.84	8751	18.88	0	0.08
CP023154	311122	311272	-	976.2	0.622	2632	4.71	0	0.1
CP023154	317044	317194	-	3287	0.574	8725	14.41	0	0.07
CP023154	319071	319221	-	5462.2	0.909	15318	26.79	0	0.04
CP023154	325111	325261	-	675.2	0.719	1819	4.54	0	0.13
CP023154	328778	328928	-	500.7	0.702	1427	4.11	0	0.24
CP023154	332310	332460	-	611.5	0.739	1629	4.68	0	0.16
CP023154	335501	335651	-	1390.3	0.832	3762	6.43	0	0.08
CP023154	338625	338775	-	1638.6	0.813	4662	4.08	0	0.1
CP023154	339487	339637	-	1639.4	0.854	4387	4.01	0	0.08
CP023154	342280	342430	-	3516.1	0.781	10570	8.12	0	0.04
CP023154	345131	345281	-	3159.3	0.871	7334	5.66	0	0.16
CP023154	349923	350073	-	7224.4	0.688	20706	11.5	0	0.03
CP023154	351151	351301	-	10483.2	0.949	29817	19.01	0	0.05
CP023154	351694	351844	-	4522.1	0.82	12002	7.02	0	0.04
CP023154	358174	358324	-	1235.8	0.888	3333	7.97	0	0.19
CP023154	366618	366768	-	720	0.844	1951	5.68	0	0.12
CP023154	371728	371878	-	888.4	0.507	2453	6.68	0	0.13
CP023154	373151	373301	-	948	0.838	2526	6.9	0	0.08
CP023154	379601	379751	-	1125.4	0.708	3047	7.66	0	0.14
CP023154	385464	385614	-	835.3	0.767	2224	6.35	0	0.1
CP023154	391646	391796	-	2065.5	0.635	5621	8.73	0	0.05
CP023154	391999	392149	-	2130.3	0.841	5840	8.7	0	0.07
CP023154	392956	393106	-	1166.9	0.758	3229	4.5	0	0.23
CP023154	403842	403992	-	2019.9	0.891	5426	7.72	0	0.06
CP023154	405745	405895	-	1937.8	0.649	5404	6	0	0.06
CP023154	406960	407110	-	2300.6	0.871	6156	7.13	0	0.06
CP023154	418113	418263	-	820.3	0.612	2285	6.54	0	0.13
CP023154	418458	418608	-	552.4	0.61	1482	4.24	0	0.15
CP023154	433976	434126	-	1040.7	0.657	2913	7.11	0	0.11
CP023154	441910	442060	-	751.3	0.519	2186	4.85	0	0.11
CP023154	447911	448061	-	4584.3	0.799	13921	6.08	0	0.04
CP023154	448903	449053	-	13958.2	0.667	39377	19.7	0	0.02
CP023154	454603	454753	-	1718.5	0.805	4594	4.85	0	0.07
CP023154	455359	455509	-	2609.6	0.883	7194	6.63	0	0.06
CP023154	460365	460515	-	4093.7	0.837	11813	12.28	0	0.06
CP023154	460760	460910	-	1585.1	0.614	4441	4.34	0	0.07
CP023154	466470	466620	-	1883.5	0.704	5205	4.82	0	0.06
CP023154	469451	469601	-	3572.3	0.656	9814	11.13	0	0.07
CP023154	479792	479942	-	12214.1	0.729	33048	23.02	0	0.03
CP023154	490390	490540	-	883.9	0.471	2421	4.34	0	0.12
CP023154	504274	504424	-	2031.2	0.757	5425	4.28	0	0.06
CP023154	504905	505055	-	8182.9	0.924	23228	20.99	0	0.03
CP023154	510559	510709	-	1199.3	0.867	3188	6.03	0	0.09
CP023154	512337	512487	-	1491.7	0.648	4431	7.06	0	0.07
CP023154	516170	516320	-	1444.6	0.571	3883	8.28	0	0.08
CP023154	522429	522579	-	861.7	0.57	2410	4.53	0	0.14
CP023154	526537	526687	-	985.3	0.855	2633	5.59	0	0.12
CP023154	538322	538472	-	1431.8	0.919	3844	13.68	0	0.23
CP023154	539056	539206	-	682	0.801	1850	5.89	0	0.15
CP023154	547380	547530	-	3727.5	0.74	10016	20.73	0	0.04
CP023154	553402	553552	-	1020.7	0.789	2782	4.11	0	0.11
CP023154	555933	556083	-	3284.4	0.888	9823	12.17	0	0.05
CP023154	560435	560585	-	1145.8	0.553	3065	4.19	0	0.09
CP023154	563333	563483	-	3036.5	0.901	7987	20.1	0	0.09
CP023154	571471	571621	-	623.2	0.826	1745	5.83	0	0.13
CP023154	574570	574720	-	859.8	0.775	2283	7.02	0	0.13
CP023154	589050	589200	-	3791.9	0.885	10989	22.24	0	0.06
CP023154	590431	590581	-	1934	0.822	5403	9.79	0	0.06
CP023154	597374	597524	-	2930.6	0.817	8344	15.19	0	0.06
CP023154	607020	607170	-	33411.7	0.961	20307	72.81	0	0.27
CP023154	613660	613810	-	1046.7	0.701	2962	6.97	0	0.15
CP023154	621726	621876	-	799.2	0.843	2141	4.04	0	0.11
CP023154	625551	625701	-	1363.6	0.689	3717	8.81	0	0.07
CP023154	638155	638305	-	1334.6	0.691	3573	7.6	0	0.08
CP023154	638483	638633	-	909.5	0.692	2604	5.06	0	0.12
CP023154	645548	645698	-	1281.4	0.77	3518	6.67	0	0.1
CP023154	650571	650721	-	1945.3	0.798	5396	10.42	0	0.06
CP023154	656792	656942	-	1013.5	0.609	2700	4.99	0	0.09
CP023154	657353	657503	-	1260	0.631	3443	6.12	0	0.08
CP023154	661832	661982	-	980.4	0.843	2642	4.68	0	0.22
CP023154	670741	670891	-	499.2	0.754	1333	4.08	0	0.17
CP023154	672926	673076	-	735.1	0.826	2097	6.12	0	0.15
CP023154	673787	673937	-	594.9	0.553	1626	4.15	0	0.19
CP023154	679192	679342	-	937.8	0.548	2537	5.34	0	0.14
CP023154	680738	680888	-	709.1	0.72	1896	4.42	0	0.23
CP023154	693817	693967	-	1264.1	0.541	3393	4.73	0	0.08
CP023154	694266	694416	-	1564.4	0.683	4168	5.95	0	0.06
CP023154	694888	695038	-	1690.6	0.731	4554	6.37	0	0.05
CP023154	697248	697398	-	1787.1	0.526	4774	6.97	0	0.06
CP023154	714652	714802	-	7820.1	0.88	24238	24.97	0	0.04
CP023154	730158	730308	-	1338.7	0.762	3647	4.18	0	0.09
CP023154	733770	733920	-	1448.3	0.841	3909	5.27	0	0.08
CP023154	739632	739782	-	3995	0.875	10804	30.57	0	0.04
CP023154	743633	743783	-	767.1	0.66	2115	4.08	0	0.18
CP023154	749464	749614	-	385.8	0.34	1075	4.33	1,31e-312	0.19
CP023154	754480	754630	-	938.2	0.83	2571	4.24	0	0.1
CP023154	758485	758635	-	2921.2	0.806	7973	6.81	0	0.05
CP023154	764093	764243	-	2787.8	0.788	9043	5.51	0	0.1
CP023154	769803	769953	-	881.3	0.763	2356	4.17	0	0.14
CP023154	771736	771886	-	689.5	0.796	1985	5.12	0	0.2
CP023154	781578	781728	-	4865	0.655	15455	23.63	0	0.05
CP023154	790777	790927	-	4556.4	0.786	12130	10.63	0	0.04
CP023154	793591	793741	-	2746.7	0.58	7684	6.09	0	0.05
CP023154	794322	794472	-	4787.4	0.859	13114	11.48	0	0.04
CP023154	799522	799672	-	764.5	0.712	2284	5.67	0	0.14
CP023154	808188	808338	-	697.8	0.681	1853	4.09	0	0.12
CP023154	811193	811343	-	1163.5	0.478	3138	7.78	0	0.1
CP023154	816212	816362	-	971.7	0.803	2707	7.36	0	0.11
CP023154	827012	827162	-	1495.1	0.861	4323	4.56	0	0.08
CP023154	831161	831311	-	2070.8	0.735	5603	4.99	0	0.07
CP023154	837306	837456	-	11994.4	0.921	30017	24.5	0	0.03
CP023154	837642	837792	-	8359.2	0.864	22202	15.22	0	0.03
CP023154	843855	844005	-	816.1	0.632	2205	5.2	0	0.12
CP023154	852576	852726	-	23976	0.589	64702	56.74	0	0.02
CP023154	859312	859462	-	1201.9	0.781	3204	8.44	0	0.12
CP023154	872339	872489	-	1083.2	0.745	2941	6.32	0	0.11
CP023154	873664	873814	-	697.4	0.738	1893	4.04	0	0.12
CP023154	876865	877015	-	1475.5	0.801	4054	8.81	0	0.08
CP023154	881899	882049	-	753.9	0.757	2101	5.42	0	0.12
CP023154	890727	890877	-	991.7	0.757	2633	7.68	0	0.14
CP023154	900719	900869	-	1367.3	0.667	3705	4.5	0	0.08
CP023154	907612	907762	-	11658	0.857	31039	20.43	0	0.03
CP023154	909866	910016	-	2916.3	0.863	8081	4.59	0	0.05
CP023154	912987	913137	-	2385	0.731	6540	6.73	0	0.05
CP023154	919650	919800	-	916.7	0.597	2555	4.04	0	0.18
CP023154	920122	920272	-	944.2	0.44	2835	4.17	0	0.14
CP023154	921760	921910	-	1045.9	0.518	2794	4.51	0	0.11
CP023154	923173	923323	-	1195.1	0.865	3224	4.78	0	0.08
CP023154	930263	930413	-	2666.5	0.841	7736	5.62	0	0.05
CP023154	932799	932949	-	2862	0.745	7712	5.27	0	0.04
CP023154	933921	934071	-	2181.6	0.596	6385	4.46	0	0.06
CP023154	935996	936146	-	2036.5	0.512	5502	4.99	0	0.07
CP023154	948659	948809	-	662	0.425	1787	4.64	0	0.14
CP023154	957501	957651	-	1630.7	0.802	4341	4.73	0	0.15
CP023154	959542	959692	-	6627.2	0.832	17806	21.03	0	0.06
CP023154	962899	963049	-	1735.4	0.821	4968	5.57	0	0.07
CP023154	969206	969356	-	2075.7	0.849	5534	6.82	0	0.08
CP023154	969779	969929	-	1521.4	0.591	4096	4.79	0	0.1
CP023154	971463	971613	-	1789.7	0.645	4988	4.91	0	0.09
CP023154	972259	972409	-	1832.7	0.948	5280	4.91	0	0.08
CP023154	974010	974160	-	2269.7	0.846	7019	6.35	0	0.06
CP023154	975870	976020	-	1928	0.775	5117	5.61	0	0.07
CP023154	979586	979736	-	2210.6	0.63	5930	7.83	0	0.07
CP023154	983433	983583	-	1204.6	0.763	3415	5.17	0	0.08
CP023154	984012	984162	-	1610.4	0.626	4642	7.04	0	0.13
CP023154	992754	992904	-	1033.1	0.482	2809	6.32	0	0.09
CP023154	995066	995216	-	904.6	0.879	2406	5.16	0	0.12
CP023154	1001375	1001525	-	681.2	0.796	1830	4.48	0	0.13
CP023154	1006138	1006288	-	584.4	0.563	1572	4.08	0	0.14
CP023154	1017450	1017600	-	2161.6	0.866	5863	11.42	0	0.06
CP023154	1019620	1019770	-	1180.8	0.541	3330	4.67	0	0.09
CP023154	1023043	1023193	-	1561.4	0.756	4180	7.45	0	0.07
CP023154	1033615	1033765	-	2809.3	0.883	7752	11.21	0	0.07
CP023154	1034574	1034724	-	2179.3	0.738	6280	8.68	0	0.07
CP023154	1036228	1036378	-	1129.6	0.736	3079	4.08	0	0.09
CP023154	1041786	1041936	-	2529.7	0.606	6929	5.72	0	0.06
CP023154	1047936	1048086	-	10489.9	0.831	12997	4.73	0	0.25
CP023154	1048250	1048400	-	77674.4	0.897	71741	63.96	0	0.08
CP023154	1048705	1048855	-	11520.4	0.937	18901	5.16	0	0.2
CP023154	1054998	1055148	-	2888.4	0.712	7714	4.96	0	0.04
CP023154	1064785	1064935	-	9374.7	0.621	24798	35.62	0	0.03
CP023154	1071324	1071474	-	5031.1	0.552	13394	9.61	0	0.05
CP023154	1074477	1074627	-	3140.5	0.838	8855	5.73	0	0.19
CP023154	1074880	1075030	-	7696.9	0.785	17156	16.24	0	0.24
CP023154	1092841	1092991	-	915.2	0.656	2430	5.32	0	0.11
CP023154	1102523	1102673	-	901.6	0.778	2463	4.96	0	0.11
CP023154	1108971	1109121	-	3872.5	0.61	11161	13.14	0	0.05
CP023154	1119735	1119885	-	4360.1	0.665	11592	17.48	0	0.03
CP023154	1121833	1121983	-	2245.2	0.535	6170	7.27	0	0.06
CP023154	1124757	1124907	-	1328.9	0.817	3712	5.81	0	0.09
CP023154	1131093	1131243	-	998.5	0.787	2652	5.77	0	0.1
CP023154	1138949	1139099	-	16724.9	0.736	44048	50.89	0	0.02
CP023154	1157144	1157294	-	713.6	0.668	1905	4.26	0	0.13
CP023154	1161081	1161231	-	917.5	0.798	2499	5.53	0	0.14
CP023154	1170460	1170610	-	785.2	0.574	2105	5.79	0	0.14
CP023154	1175273	1175423	-	702.7	0.733	1908	4.37	0	0.11
CP023154	1176028	1176178	-	1449.5	0.673	3888	9.9	0	0.07
CP023154	1178743	1178893	-	788.6	0.598	2133	4.49	0	0.13
CP023154	1185976	1186126	-	5482.9	0.916	15410	20.8	0	0.03
CP023154	1186830	1186980	-	1810.1	0.901	4888	5.51	0	0.11
CP023154	1193635	1193785	-	44740.4	0.591	86987	32.16	0	0.02
CP023154	1194784	1194934	-	25425.5	0.58	64904	15.06	0	0.02
CP023154	1200058	1200208	-	831.6	0.729	2227	4.05	0	0.1
CP023154	1206632	1206782	-	3297.6	0.777	8787	12.5	0	0.06
CP023154	1211268	1211418	-	2732.8	0.729	7295	5.95	0	0.09
CP023154	1212806	1212956	-	2187.6	0.842	6035	5.55	0	0.06
CP023154	1223745	1223895	-	674.4	0.713	1790	4.84	0	0.18
CP023154	1230216	1230366	-	2396.3	0.907	6576	13.55	0	0.08
CP023154	1230810	1230960	-	918.6	0.802	2446	4.57	0	0.1
CP023154	1237083	1237233	-	691	0.678	1854	7.81	0	0.13
CP023154	1242541	1242691	-	4919.6	0.903	14280	7.15	0	0.04
CP023154	1243920	1244070	-	10935.3	0.932	28208	17.72	0	0.06
CP023154	1245744	1245894	-	5627.2	0.751	15434	5.26	0	0.04
CP023154	1249522	1249672	-	11730.7	0.894	34659	19.52	0	0.03
CP023154	1252113	1252263	-	2303.6	0.783	6164	4.36	0	0.06
CP023154	1260816	1260966	-	1149.9	0.611	3082	5.4	0	0.1
CP023154	1266795	1266945	-	1534.6	0.771	4124	7.1	0	0.07
CP023154	1272385	1272535	-	1888.8	0.722	5048	4.23	0	0.06
CP023154	1275288	1275438	-	10836.2	0.77	30513	30.51	0	0.02
CP023154	1283838	1283988	-	2103.6	0.782	5965	10.42	0	0.09
CP023154	1284738	1284888	-	898.6	0.838	2430	4.63	0	0.13
CP023154	1285537	1285687	-	969.5	0.817	2807	4.43	0	0.11
CP023154	1289825	1289975	-	1537.3	0.804	4086	4.19	0	0.09
CP023154	1291421	1291571	-	8914.6	0.814	24773	37.96	0	0.03
CP023154	1304968	1305118	-	1397.1	0.862	3766	8.5	0	0.12
CP023154	1310949	1311099	-	995.1	0.647	2689	5.67	0	0.1
CP023154	1317978	1318128	-	1227.2	0.741	3295	5.4	0	0.09
CP023154	1319480	1319630	-	1359.4	0.843	3700	6.5	0	0.08
CP023154	1330245	1330395	-	2231.7	0.617	6311	5.83	0	0.06
CP023154	1332150	1332300	-	5977.2	0.607	15876	19.29	0	0.04
CP023154	1338713	1338863	-	957.8	0.78	2557	4.81	0	0.12
CP023154	1345100	1345250	-	1868.8	0.631	5396	7.15	0	0.09
CP023154	1346470	1346620	-	1495.8	0.608	3983	5.52	0	0.07
CP023154	1350152	1350302	-	1137.5	0.798	3151	5.46	0	0.1
CP023154	1361076	1361226	-	2511.2	0.504	6665	7.71	0	0.05
CP023154	1361569	1361719	-	3202.3	0.678	8536	10.22	0	0.04
CP023154	1375369	1375519	-	7980.2	0.586	21777	27.23	0	0.03
CP023154	1387568	1387718	-	984.9	0.892	2631	4.91	0	0.12
CP023154	1402963	1403113	-	2030.1	0.682	6103	9.66	0	0.14
CP023154	1408602	1408752	-	16415.2	0.933	47115	31.96	0	0.02
CP023154	1409335	1409485	-	5404.9	0.425	15262	7.86	0	0.03
CP023154	1416259	1416409	-	4961.1	0.737	14849	11.22	0	0.05
CP023154	1417591	1417741	-	3386.9	0.932	9627	7.4	0	0.05
CP023154	1424245	1424395	-	7089.5	0.599	20242	12.48	0	0.03
CP023154	1427432	1427582	-	3345.4	0.638	9278	5.63	0	0.06
CP023154	1427842	1427992	-	3967.1	0.481	10579	6.99	0	0.04
CP023154	1435581	1435731	-	1597.2	0.572	4316	4.52	0	0.07
CP023154	1436599	1436749	-	1492.4	0.814	4046	4.26	0	0.07
CP023154	1437104	1437254	-	2574.2	0.814	7503	7.69	0	0.08
CP023154	1439683	1439833	-	1818.3	0.908	5062	5.23	0	0.06
CP023154	1447615	1447765	-	1838.7	0.743	4917	4.3	0	0.09
CP023154	1450688	1450838	-	7390.9	0.956	23320	20.01	0	0.04
CP023154	1456283	1456433	-	3716.9	0.917	10476	12.38	0	0.06
CP023154	1457161	1457311	-	1973.6	0.807	5252	5.97	0	0.06
CP023154	1464396	1464546	-	1576.1	0.844	4232	5.62	0	0.08
CP023154	1466229	1466379	-	2081	0.854	5999	7.57	0	0.06
CP023154	1470538	1470688	-	1617.1	0.52	4380	5.8	0	0.07
CP023154	1477052	1477202	-	11327.9	0.619	30065	22.37	0	0.02
CP023154	1482851	1483001	-	1998.8	0.583	5604	9.22	0	0.07
CP023154	1488522	1488672	-	1329.7	0.951	3624	4.86	0	0.1
CP023154	1490309	1490459	-	1624.7	0.864	4660	5.26	0	0.07
CP023154	1495760	1495910	-	1425	0.773	3894	4.07	0	0.14
CP023154	1498102	1498252	-	1788.2	0.903	4886	5.22	0	0.09
CP023154	1499054	1499204	-	2146.9	0.781	5712	6.48	0	0.07
CP023154	1500649	1500799	-	1795	0.807	4770	5.83	0	0.06
CP023154	1508026	1508176	-	1710.2	0.371	4713	7.14	0	0.06
CP023154	1508528	1508678	-	1134.9	0.866	3182	4.59	0	0.1
CP023154	1514477	1514627	-	11604.5	0.956	32493	11.61	0	0.04
CP023154	1516652	1516802	-	10468.8	0.779	29222	9.93	0	0.03
CP023154	1518874	1519024	-	8253	0.821	23069	7.51	0	0.04
CP023154	1521229	1521379	-	3116.7	0.778	8503	4.07	0	0.05
CP023154	1526472	1526622	-	740	0.917	1983	4.28	0	0.16
CP023154	1534179	1534329	-	2654.8	0.862	7096	15.34	0	0.12
CP023154	1541047	1541197	-	3822.1	0.96	9948	16.39	0	0.2
CP023154	1546346	1546496	-	724.5	0.606	2023	4.04	0	0.15
CP023154	1554752	1554902	-	1053.1	0.909	2796	6.77	0	0.1
CP023154	1560390	1560540	-	655.6	0.765	1889	4.66	0	0.16
CP023154	1566953	1567103	-	997.7	0.36	2783	4.59	0	0.12
CP023154	1572941	1573091	-	4633.3	0.506	13728	18.1	0	0.04
CP023154	1578144	1578294	-	3998.4	0.679	10034	11.57	0	0.07
CP023154	1578506	1578656	-	1907.6	0.626	5130	5.06	0	0.05
CP023154	1579634	1579784	-	1631.8	0.736	4685	4.26	0	0.07
CP023154	1591467	1591617	-	9569.8	0.98	15558	40.67	0	0.11
CP023154	1600697	1600847	-	1085.5	0.583	2920	4.6	0	0.1
CP023154	1601789	1601939	-	1671.8	0.89	4711	7.07	0	0.11
CP023154	1618488	1618638	-	5672.1	0.878	15908	14.08	0	0.05
CP023154	1619448	1619598	-	2987.1	0.525	8713	6.77	0	0.05
CP023154	1627683	1627833	-	14566.7	0.854	38485	24.73	0	0.02
CP023154	1636591	1636741	-	3645	0.917	9972	5.31	0	0.05
CP023154	1637119	1637269	-	2898.9	0.687	7807	4.21	0	0.04
CP023154	1637939	1638089	-	5752.3	0.909	16009	8.95	0	0.04
CP023154	1639407	1639557	-	4766.6	0.519	13505	7.14	0	0.04
CP023154	1648041	1648191	-	1085.5	0.601	2900	4.74	0	0.09
CP023154	1652169	1652319	-	3526.3	0.965	9897	10.01	0	0.05
CP023154	1653214	1653364	-	4958.8	0.571	13534	15.7	0	0.04
CP023154	1658797	1658947	-	2300.2	0.831	6378	5.5	0	0.06
CP023154	1662978	1663128	-	4097.5	0.913	11038	13.45	0	0.05
CP023154	1663488	1663638	-	6239.1	0.717	15230	22.7	0	0.04
CP023154	1674043	1674193	-	891.5	0.862	2490	4.23	0	0.12
CP023154	1674472	1674622	-	925.7	0.724	2619	4.24	0	0.12
CP023154	1675603	1675753	-	1049	0.707	2849	4.4	0	0.12
CP023154	1682539	1682689	-	4655.1	0.563	12511	17.94	0	0.05
CP023154	1683622	1683772	-	2818.3	0.878	7763	7.13	0	0.1
CP023154	1688044	1688194	-	4472.8	0.947	12228	15.28	0	0.05
CP023154	1688906	1689056	-	1400.1	0.843	3854	4.83	0	0.08
CP023154	1691918	1692068	-	1494.7	0.728	4053	5	0	0.11
CP023154	1699778	1699928	-	312726	0.982	695626	240.23	0	0.01
CP023154	1705645	1705795	-	691.4	0.635	1872	4.26	0	0.12
CP023154	1706694	1706844	-	709.5	0.771	1885	4.02	0	0.12
CP023154	1715502	1715652	-	1864.7	0.753	5057	6.49	0	0.07
CP023154	1716055	1716205	-	2945.3	0.832	8862	10.98	0	0.05
CP023154	1716610	1716760	-	1643.9	0.766	4385	5.77	0	0.07
CP023154	1726548	1726698	-	169870	0.918	410034	159.83	0	0.01
CP023154	1736852	1737002	-	698.6	0.793	1893	4.02	0	0.13
CP023154	1737412	1737562	-	1033.9	0.687	2944	6.16	0	0.13
CP023154	1742554	1742704	-	1694.4	0.784	4642	9.78	0	0.1
CP023154	1743135	1743285	-	1193.3	0.643	3235	6.89	0	0.08
CP023154	1748611	1748761	-	3194.7	0.878	9849	4.11	0	0.05
CP023154	1749697	1749847	-	9844.9	0.922	26241	10.14	0	0.02
CP023154	1755968	1756118	-	22206.7	0.891	67532	10.74	0	0.02
CP023154	1757030	1757180	-	11981.2	0.49	31999	5.51	0	0.03
CP023154	1766481	1766631	-	916	0.848	2506	4.04	0	0.12
CP023154	1769917	1770067	-	1448.7	0.918	3977	7.5	0	0.1
CP023154	1779817	1779967	-	2918.2	0.475	7993	16.79	0	0.05
CP023154	1781593	1781743	-	1465.3	0.676	3973	7.33	0	0.08
CP023154	1789655	1789805	-	3370.7	0.792	9033	20.16	0	0.08
CP023154	1790335	1790485	-	1469.8	0.635	4339	7.45	0	0.09
CP023154	1796920	1797070	-	631.5	0.299	1821	4.24	0	0.14
CP023154	1798373	1798523	-	1077.2	0.884	2951	7.13	0	0.08
CP023154	1802839	1802989	-	575	0.742	1574	4.05	0	0.15
CP023154	1808742	1808892	-	1495.8	0.814	3992	9.34	0	0.08
CP023154	1810690	1810840	-	861.7	0.601	2341	4.77	0	0.14
CP023154	1812862	1813012	-	808.9	0.829	2373	4.18	0	0.12
CP023154	1832266	1832416	-	3633.3	0.674	9772	23.2	0	0.05
CP023154	1832874	1833024	-	1126.6	0.879	3391	5.86	0	0.1
CP023154	1841210	1841360	-	841.7	0.646	2303	4.21	0	0.15
CP023154	1845245	1845395	-	966.4	0.796	2885	4.76	0	0.16
CP023154	1851171	1851321	-	1177.4	0.785	3141	4.59	0	0.1
CP023154	1851513	1851663	-	2346.6	0.84	6274	9.92	0	0.06
CP023154	1853026	1853176	-	1354.1	0.585	3666	4.93	0	0.08
CP023154	1860043	1860193	-	9014.1	0.723	24359	15.59	0	0.03
CP023154	1862409	1862559	-	9847.5	0.912	26905	14.26	0	0.03
CP023154	1867444	1867594	-	26100.3	0.811	72174	48.02	0	0.02
CP023154	1872130	1872280	-	5251.9	0.823	14022	6.34	0	0.06
CP023154	1873003	1873153	-	2019.2	0.814	5604	4.68	0	0.08
CP023154	1879369	1879519	-	14468.4	0.905	34106	18.33	0	0.03
CP023154	1883735	1883885	-	20174.7	0.907	44035	34.54	0	0.05
CP023154	1888908	1889058	-	1116.4	0.134	2970	7.11	0	0.08
CP023154	1889259	1889409	-	1252	0.699	3360	8.13	0	0.14
CP023154	11104	11254	+	6764.3	0.92	14856	7.72	0	0.18
CP023154	11556	11706	+	15797.6	0.934	22089	21.26	0	0.24
CP023154	12629	12779	+	5597.4	0.936	14334	6.11	0	0.14
CP023154	23394	23544	+	8480.6	0.936	26439	44.79	0	0.07
CP023154	34607	34757	+	601.7	0.661	1686	4.61	0	0.18
CP023154	40381	40531	+	941.2	0.76	2529	6.03	0	0.09
CP023154	42619	42769	+	1267.1	0.901	3389	7.05	0	0.14
CP023154	48273	48423	+	1138.6	0.575	3022	6.94	0	0.1
CP023154	58804	58954	+	1102.5	0.726	3093	6.32	0	0.1
CP023154	59794	59944	+	664.3	0.678	1842	4.14	0	0.18
CP023154	61597	61747	+	1261.1	0.686	3352	7.55	0	0.1
CP023154	66328	66478	+	988.7	0.613	2647	6.1	0	0.1
CP023154	74014	74164	+	1255.4	0.835	3461	8.1	0	0.09
CP023154	82143	82293	+	1847	0.482	4949	10.09	0	0.07
CP023154	89135	89285	+	2097.2	0.833	5646	7.9	0	0.07
CP023154	94015	94165	+	1338.3	0.597	3985	4.3	0	0.17
CP023154	95457	95607	+	1419.3	0.723	3772	5	0	0.1
CP023154	102648	102798	+	847	0.788	2258	4.71	0	0.12
CP023154	110875	111025	+	987.9	0.687	2877	6.07	0	0.13
CP023154	120618	120768	+	33189.1	0.829	62226	14.58	0	0.06
CP023154	121937	122087	+	12649.6	0.75	33492	4.79	0	0.03
CP023154	124277	124427	+	29560.3	0.934	50077	11.68	0	0.05
CP023154	124987	125137	+	12368.6	0.802	32832	4.46	0	0.04
CP023154	143305	143455	+	1558.4	0.711	4173	8.74	0	0.09
CP023154	147862	148012	+	967.6	0.675	2574	5.09	0	0.11
CP023154	150928	151078	+	711.7	0.79	1968	4.09	0	0.17
CP023154	159359	159509	+	3207.5	0.571	9392	13.97	0	0.04
CP023154	165216	165366	+	1198.5	0.749	3335	5.03	0	0.11
CP023154	166793	166943	+	1659	0.796	4526	5.76	0	0.1
CP023154	171701	171851	+	2229	0.893	5957	7.58	0	0.16
CP023154	172186	172336	+	3261.8	0.645	8711	13.44	0	0.05
CP023154	179442	179592	+	587.4	0.649	1617	4.01	0	0.19
CP023154	185797	185947	+	1314.6	0.842	3573	6.83	0	0.07
CP023154	187157	187307	+	1071.6	0.819	3055	4.71	0	0.11
CP023154	191779	191929	+	1714.7	0.598	4803	5	0	0.06
CP023154	192847	192997	+	5270.4	0.816	13824	19.55	0	0.04
CP023154	196287	196437	+	1629.2	0.648	4469	4.68	0	0.06
CP023154	200710	200860	+	955.9	0.835	2559	6.1	0	0.11
CP023154	202595	202745	+	607.4	0.863	1612	4.11	0	0.15
CP023154	206334	206484	+	1416.7	0.67	4130	12.41	0	0.07
CP023154	218675	218825	+	3698.1	0.774	10006	15.68	0	0.05
CP023154	220400	220550	+	1854.1	0.715	5291	6.82	0	0.06
CP023154	220742	220892	+	1475.8	0.865	3931	5.57	0	0.07
CP023154	229232	229382	+	2509.4	0.807	6671	14.3	0	0.07
CP023154	232314	232464	+	1022.2	0.658	2719	4.82	0	0.1
CP023154	239687	239837	+	2939.3	0.715	8241	6.08	0	0.05
CP023154	244457	244607	+	12500.4	0.974	13621	15.26	0	0.23
CP023154	245243	245393	+	6409.8	0.785	10704	7.44	0	0.41
CP023154	245591	245741	+	3775.3	0.862	7826	4.19	0	0.33
CP023154	245925	246075	+	7343.1	0.781	19009	8.61	0	0.05
CP023154	252487	252637	+	835.7	0.762	2234	4.07	0	0.1
CP023154	259060	259210	+	16023	0.873	40632	52.29	0	0.03
CP023154	259601	259751	+	2850.3	0.498	8625	5.68	0	0.05
CP023154	265253	265403	+	3105.4	0.762	8489	16.02	0	0.08
CP023154	269878	270028	+	989.4	0.774	2639	4.11	0	0.09
CP023154	279198	279348	+	9474.1	0.963	26124	19.29	0	0.04
CP023154	284513	284663	+	2017.7	0.805	5831	4.56	0	0.07
CP023154	290117	290267	+	1357.9	0.667	3726	7.79	0	0.09
CP023154	295795	295945	+	49702.2	0.967	56847	37.3	0	0.08
CP023154	296418	296568	+	10775.5	0.886	23863	5.61	0	0.14
CP023154	301881	302031	+	2021.8	0.854	5398	8.96	0	0.07
CP023154	308121	308271	+	1518.4	0.866	4191	8.5	0	0.08
CP023154	317129	317279	+	4117.1	0.578	11137	11.81	0	0.08
CP023154	321640	321790	+	1747.1	0.82	4669	4.05	0	0.08
CP023154	322980	323130	+	2909.5	0.943	8134	11.1	0	0.06
CP023154	328320	328470	+	942.7	0.572	2534	5.22	0	0.1
CP023154	331480	331630	+	1118.7	0.702	2980	6.91	0	0.1
CP023154	346413	346563	+	1213.6	0.879	3320	7.13	0	0.1
CP023154	347138	347288	+	1440.1	0.506	3828	8.73	0	0.09
CP023154	353349	353499	+	3530.8	0.85	9383	10.26	0	0.05
CP023154	353955	354105	+	4527.8	0.828	12530	14.11	0	0.05
CP023154	360353	360503	+	603.6	0.717	1747	4.27	0	0.16
CP023154	364568	364718	+	951.7	0.85	2745	6.26	0	0.15
CP023154	367040	367190	+	813.1	0.776	2240	5.42	0	0.14
CP023154	377996	378146	+	1819.8	0.599	5184	4.77	0	0.1
CP023154	378523	378673	+	2936.6	0.834	8747	7.9	0	0.05
CP023154	379045	379195	+	2605.4	0.789	7276	6.45	0	0.05
CP023154	384337	384487	+	1773.9	0.753	4774	5.77	0	0.08
CP023154	385327	385477	+	2355.3	0.897	6724	8.74	0	0.06
CP023154	393184	393334	+	1848.1	0.883	5200	10.08	0	0.1
CP023154	399342	399492	+	1041	0.925	2921	4.43	0	0.13
CP023154	401786	401936	+	1633.7	0.696	4348	6.72	0	0.07
CP023154	404932	405082	+	1515	0.671	4024	6.96	0	0.08
CP023154	409291	409441	+	845.1	0.883	2312	4.77	0	0.16
CP023154	417392	417542	+	727.2	0.593	1930	4.14	0	0.11
CP023154	418244	418394	+	703.4	0.484	2002	4.05	0	0.14
CP023154	423972	424122	+	779.9	0.783	2241	5.48	0	0.14
CP023154	424668	424818	+	1018.1	0.723	2742	7.38	0	0.09
CP023154	429199	429349	+	806.7	0.827	2170	6.21	0	0.16
CP023154	431567	431717	+	768.6	0.797	2132	6.17	0	0.13
CP023154	441725	441875	+	3363.1	0.912	9304	21.8	0	0.07
CP023154	448917	449067	+	663.1	0.596	1762	4.61	0	0.15
CP023154	450816	450966	+	617.9	0.678	1696	4.45	0	0.15
CP023154	456957	457107	+	2051.2	0.756	5507	9.7	0	0.09
CP023154	459630	459780	+	1276.9	0.596	3391	5.35	0	0.14
CP023154	463469	463619	+	1106.2	0.575	2968	5.78	0	0.12
CP023154	466451	466601	+	761.5	0.726	2072	4.34	0	0.13
CP023154	488044	488194	+	2536.9	0.736	6747	10.68	0	0.06
CP023154	500633	500783	+	7101.6	0.825	19460	30.13	0	0.03
CP023154	508495	508645	+	81436.5	0.891	193289	139.94	0	0.01
CP023154	514419	514569	+	1877.5	0.671	5134	7.54	0	0.06
CP023154	518030	518180	+	1087	0.709	2941	4.3	0	0.09
CP023154	519154	519304	+	1258.4	0.697	3537	4.92	0	0.08
CP023154	525559	525709	+	1480.4	0.699	3931	6.79	0	0.08
CP023154	526283	526433	+	1094.5	0.334	2927	4.97	0	0.09
CP023154	527326	527476	+	1302.2	0.664	3613	5.87	0	0.08
CP023154	533923	534073	+	7042.4	0.845	19434	30.47	0	0.03
CP023154	545282	545432	+	941.2	0.615	2506	5.38	0	0.1
CP023154	545678	545828	+	1058.4	0.873	2831	6.13	0	0.11
CP023154	554117	554267	+	729.4	0.664	1966	4.21	0	0.12
CP023154	560146	560296	+	923.9	0.554	2495	4.35	0	0.11
CP023154	561490	561640	+	992.8	0.851	2676	4.78	0	0.1
CP023154	570211	570361	+	653	0.621	2032	4.34	0	0.14
CP023154	573674	573824	+	1060.3	0.614	2816	6.63	0	0.1
CP023154	577545	577695	+	1030.5	0.745	2736	5.43	0	0.09
CP023154	585965	586115	+	804.8	0.892	2137	4.77	0	0.1
CP023154	605169	605319	+	1379.8	0.803	3729	8.57	0	0.08
CP023154	606948	607098	+	939.7	0.881	2543	5.21	0	0.21
CP023154	610945	611095	+	956.6	0.549	2602	5.12	0	0.1
CP023154	613414	613564	+	1360.6	0.845	3665	7.2	0	0.08
CP023154	617384	617534	+	1798.7	0.877	5182	7.95	0	0.09
CP023154	619204	619354	+	1193.3	0.508	3172	5.75	0	0.12
CP023154	621137	621287	+	919.3	0.832	2516	4.17	0	0.09
CP023154	634143	634293	+	854.9	0.732	2276	4.91	0	0.11
CP023154	635995	636145	+	891.1	0.819	2617	4.07	0	0.14
CP023154	640600	640750	+	1853.4	0.717	4922	8.64	0	0.1
CP023154	640944	641094	+	987.9	0.738	2702	4.36	0	0.09
CP023154	644565	644715	+	1825.1	0.846	4861	9.24	0	0.07
CP023154	648291	648441	+	779.9	0.643	2249	4.43	0	0.26
CP023154	661279	661429	+	728.3	0.704	1961	4.4	0	0.11
CP023154	663926	664076	+	1475.1	0.922	4105	5.71	0	0.07
CP023154	666535	666685	+	2003	0.808	5514	8.55	0	0.07
CP023154	667566	667716	+	1312.7	0.78	3948	5.87	0	0.12
CP023154	678307	678457	+	83690.8	0.909	87743	34.33	0	0.09
CP023154	700512	700662	+	5237.2	0.491	14547	4.85	0	0.04
CP023154	702726	702876	+	8114	0.741	21622	7.35	0	0.02
CP023154	703171	703321	+	25282.7	0.917	61607	30.43	0	0.02
CP023154	711933	712083	+	834.2	0.848	2227	5.97	0	0.17
CP023154	713583	713733	+	661.6	0.919	1800	4.31	0	0.12
CP023154	716898	717048	+	949.5	0.605	2569	4.59	0	0.1
CP023154	721517	721667	+	1716.6	0.516	4619	8.27	0	0.08
CP023154	728533	728683	+	1876.4	0.84	5216	9.11	0	0.06
CP023154	731098	731248	+	1662	0.693	4608	9.35	0	0.11
CP023154	743797	743947	+	755.4	0.534	2188	4.04	0	0.18
CP023154	744117	744267	+	776.9	0.794	2127	4.2	0	0.19
CP023154	748547	748697	+	1119.4	0.558	3164	4.16	0	0.08
CP023154	751820	751970	+	1734.7	0.513	4811	7.07	0	0.08
CP023154	752606	752756	+	1143.5	0.638	3064	4.34	0	0.08
CP023154	754315	754465	+	2137.9	0.818	5996	10.02	0	0.09
CP023154	760102	760252	+	1075	0.684	2974	6.09	0	0.11
CP023154	762012	762162	+	807.4	0.797	2439	4.31	0	0.14
CP023154	765972	766122	+	666.1	0.743	1783	4.52	0	0.14
CP023154	781183	781333	+	745.6	0.638	2022	4.39	0	0.11
CP023154	782822	782972	+	1464.2	0.877	4027	9.85	0	0.08
CP023154	795085	795235	+	2358.6	0.723	6287	9.47	0	0.06
CP023154	795752	795902	+	1930.6	0.595	5164	7.75	0	0.06
CP023154	796093	796243	+	2643.1	0.908	7188	10.85	0	0.06
CP023154	806623	806773	+	696.7	0.828	1887	4.21	0	0.15
CP023154	812340	812490	+	826.3	0.765	2223	5.13	0	0.14
CP023154	813688	813838	+	1119.8	0.772	3171	7.92	0	0.09
CP023154	819045	819195	+	1659	0.715	4503	8.09	0	0.08
CP023154	824160	824310	+	3488.2	0.851	9390	7	0	0.04
CP023154	824946	825096	+	9794	0.572	32222	25	0	0.03
CP023154	839547	839697	+	2904.6	0.779	7725	10.05	0	0.05
CP023154	840170	840320	+	1719.6	0.739	4697	5.63	0	0.07
CP023154	840589	840739	+	3374.1	0.947	9845	11.94	0	0.05
CP023154	847212	847362	+	4464.5	0.535	11866	5.91	0	0.04
CP023154	849959	850109	+	10177.6	0.546	27062	14.88	0	0.03
CP023154	860123	860273	+	2025.2	0.82	5441	7.34	0	0.05
CP023154	863220	863370	+	1821.7	0.881	5004	7.46	0	0.08
CP023154	873207	873357	+	1052.7	0.817	2796	4.05	0	0.13
CP023154	875764	875914	+	2897.1	0.644	8310	12.61	0	0.04
CP023154	876132	876282	+	2669.9	0.826	7529	11.35	0	0.1
CP023154	886720	886870	+	492.1	0.738	1321	6.06	0	0.14
CP023154	894362	894512	+	3333	0.751	9868	14.54	0	0.04
CP023154	895069	895219	+	1848.9	0.879	5125	7.46	0	0.07
CP023154	900365	900515	+	476.6	0.826	1314	4.15	0	0.21
CP023154	903676	903826	+	553.9	0.559	1569	5.03	0	0.17
CP023154	920255	920405	+	1540.3	0.519	4183	8.44	0	0.07
CP023154	928165	928315	+	1536.9	0.657	4399	8.09	0	0.1
CP023154	936683	936833	+	759.2	0.746	2111	4.99	0	0.14
CP023154	940242	940392	+	595.3	0.435	1592	4.49	0	0.14
CP023154	942304	942454	+	616.4	0.689	1646	5.31	0	0.22
CP023154	948758	948908	+	763	0.476	2035	5.53	0	0.12
CP023154	952664	952814	+	860.6	0.582	2587	4.43	0	0.14
CP023154	956945	957095	+	2875.2	0.806	7631	17.07	0	0.07
CP023154	959669	959819	+	1035.4	0.303	3118	5.3	0	0.13
CP023154	961982	962132	+	994.3	0.825	2685	5.42	0	0.12
CP023154	970017	970167	+	3885	0.824	11001	7.85	0	0.07
CP023154	973709	973859	+	4792.6	0.938	14566	8.67	0	0.05
CP023154	974026	974176	+	8769.6	0.9	22787	16.46	0	0.05
CP023154	978778	978928	+	3287	0.903	9002	5.72	0	0.05
CP023154	979674	979824	+	5189.4	0.637	13782	12.58	0	0.04
CP023154	982950	983100	+	1843.2	0.773	5020	4.09	0	0.09
CP023154	990208	990358	+	4122.7	0.689	11991	5.83	0	0.05
CP023154	993468	993618	+	11830.9	0.929	33841	20.93	0	0.04
CP023154	998612	998762	+	47599.4	0.749	115324	125.73	0	0.02
CP023154	1007418	1007568	+	1159	0.585	3356	5.47	0	0.09
CP023154	1013134	1013284	+	7459.5	0.798	20871	21.95	0	0.03
CP023154	1029328	1029478	+	4603.1	0.631	12434	11.76	0	0.04
CP023154	1032757	1032907	+	3537.6	0.768	9596	7.14	0	0.06
CP023154	1038232	1038382	+	2834.9	0.717	7616	4.05	0	0.06
CP023154	1040019	1040169	+	7683.3	0.926	20620	12.66	0	0.03
CP023154	1041501	1041651	+	6251.5	0.902	18100	11.22	0	0.04
CP023154	1046307	1046457	+	1393.7	0.792	3716	4.47	0	0.12
CP023154	1048526	1048676	+	967.9	0.564	3277	4.8	0	0.24
CP023154	1062391	1062541	+	799.9	0.726	2282	4.7	0	0.12
CP023154	1063438	1063588	+	857.6	0.747	2328	5.1	0	0.1
CP023154	1068936	1069086	+	1272.4	0.473	3382	6.8	0	0.12
CP023154	1069586	1069736	+	843.2	0.754	2352	4.15	0	0.11
CP023154	1079301	1079451	+	2660.8	0.538	7185	8.15	0	0.04
CP023154	1079749	1079899	+	6630.6	0.876	17967	26.27	0	0.03
CP023154	1089523	1089673	+	759.2	0.789	2024	5.5	0	0.12
CP023154	1094536	1094686	+	844.7	0.696	2352	5.58	0	0.2
CP023154	1100898	1101048	+	1035	0.811	2910	5.54	0	0.09
CP023154	1102329	1102479	+	1834.9	0.804	5214	10.92	0	0.07
CP023154	1110517	1110667	+	911.1	0.748	2496	4.94	0	0.1
CP023154	1114936	1115086	+	1926.1	0.856	6239	9.9	0	0.07
CP023154	1119659	1119809	+	1853.8	0.672	5054	4.75	0	0.08
CP023154	1123111	1123261	+	1905	0.848	6148	5.57	0	0.09
CP023154	1123998	1124148	+	4060.2	0.76	10802	11.6	0	0.05
CP023154	1128652	1128802	+	2071.2	0.863	5531	4.75	0	0.07
CP023154	1129234	1129384	+	1519.2	0.663	4104	4.88	0	0.08
CP023154	1129903	1130053	+	1888.8	0.405	5537	6.15	0	0.06
CP023154	1130521	1130671	+	2486	0.733	6639	8.3	0	0.06
CP023154	1134756	1134906	+	934.8	0.657	2491	4.24	0	0.13
CP023154	1139750	1139900	+	790.5	0.521	2098	4.72	0	0.14
CP023154	1141037	1141187	+	1244.9	0.632	3312	7.49	0	0.09
CP023154	1143652	1143802	+	1458.1	0.663	3977	7.29	0	0.08
CP023154	1156615	1156765	+	2507.1	0.793	7046	8.65	0	0.07
CP023154	1157503	1157653	+	1322.5	0.684	3731	4.51	0	0.08
CP023154	1159091	1159241	+	1919.7	0.788	5340	7.27	0	0.09
CP023154	1164312	1164462	+	4881.2	0.938	13760	15.79	0	0.07
CP023154	1170497	1170647	+	3130.3	0.813	8379	4.04	0	0.05
CP023154	1172798	1172948	+	4773.8	0.781	13466	6.74	0	0.03
CP023154	1173249	1173399	+	4666.4	0.846	12712	6.66	0	0.03
CP023154	1179807	1179957	+	1126.9	0.675	3186	4.79	0	0.1
CP023154	1180353	1180503	+	2195.1	0.842	5964	9.97	0	0.06
CP023154	1185928	1186078	+	1700.8	0.861	4607	9.76	0	0.08
CP023154	1190652	1190802	+	953.3	0.645	2559	5.25	0	0.11
CP023154	1192085	1192235	+	582.1	0.718	1590	4.09	0	0.17
CP023154	1194118	1194268	+	730.6	0.476	1987	4.73	0	0.14
CP023154	1200592	1200742	+	860.6	0.747	2318	5.04	0	0.11
CP023154	1205721	1205871	+	1086.6	0.752	2909	4.79	0	0.09
CP023154	1206625	1206775	+	3232	0.799	9259	15.59	0	0.08
CP023154	1221624	1221774	+	502.2	0.796	1334	4.22	0	0.17
CP023154	1222662	1222812	+	471.4	0.8	1356	4.15	0	0.2
CP023154	1229347	1229497	+	1125.1	0.783	3112	6.04	0	0.1
CP023154	1237100	1237250	+	1332.7	0.569	3707	8.24	0	0.11
CP023154	1245772	1245922	+	618.3	0.607	1653	4.62	0	0.15
CP023154	1250842	1250992	+	1752	0.528	4691	10.89	0	0.07
CP023154	1255218	1255368	+	1611.1	0.789	4303	7	0	0.07
CP023154	1256260	1256410	+	1711.7	0.851	4568	8.2	0	0.07
CP023154	1268606	1268756	+	27404.7	0.82	73589	29.68	0	0.02
CP023154	1269133	1269283	+	21238	0.861	56872	19.44	0	0.02
CP023154	1274575	1274725	+	21765.8	0.816	60476	24.25	0	0.02
CP023154	1283683	1283833	+	2208.3	0.778	5937	11.89	0	0.06
CP023154	1289501	1289651	+	1047.1	0.604	2831	4.25	0	0.13
CP023154	1290965	1291115	+	1297.6	0.733	3611	4.48	0	0.07
CP023154	1291473	1291623	+	2880.5	0.63	10002	4.93	0	0.09
CP023154	1296406	1296556	+	15446.1	0.822	41984	4.39	0	0.02
CP023154	1297705	1297855	+	83855.8	0.583	207797	34.36	0	0.01
CP023154	1308046	1308196	+	32004.5	0.939	87922	37.74	0	0.02
CP023154	1328184	1328334	+	4502.5	0.605	12118	14.06	0	0.04
CP023154	1333808	1333958	+	2195.9	0.669	5897	13.15	0	0.07
CP023154	1343885	1344035	+	1707.2	0.815	4720	8.14	0	0.1
CP023154	1345432	1345582	+	2785.5	0.721	7393	13.19	0	0.05
CP023154	1352283	1352433	+	3498	0.844	9296	11.95	0	0.05
CP023154	1354268	1354418	+	4719.2	0.937	13215	16.18	0	0.07
CP023154	1354997	1355147	+	1417.1	0.767	4035	4.17	0	0.12
CP023154	1357824	1357974	+	1371.1	0.856	3733	5.1	0	0.1
CP023154	1363322	1363472	+	2997.7	0.628	9176	12.35	0	0.05
CP023154	1364372	1364522	+	1627.7	0.84	4463	4.42	0	0.11
CP023154	1369010	1369160	+	2257.3	0.526	6247	5.04	0	0.08
CP023154	1374493	1374643	+	5195.4	0.899	15490	6.9	0	0.05
CP023154	1375465	1375615	+	6246.3	0.628	16207	8.38	0	0.04
CP023154	1376808	1376958	+	7301.2	0.829	19464	9.78	0	0.03
CP023154	1381923	1382073	+	7641.1	0.927	21347	21	0	0.04
CP023154	1389630	1389780	+	5617.8	0.621	15018	15.69	0	0.03
CP023154	1400423	1400573	+	1156	0.551	3068	6.7	0	0.09
CP023154	1406789	1406939	+	645.8	0.649	1758	5.36	0	0.2
CP023154	1413902	1414052	+	2689.5	0.721	7697	4.93	0	0.1
CP023154	1415548	1415698	+	3934.3	0.74	10906	7.45	0	0.04
CP023154	1416036	1416186	+	6589.5	0.853	17911	13.66	0	0.03
CP023154	1422746	1422896	+	1640.1	0.423	4393	4.84	0	0.06
CP023154	1423822	1423972	+	2328.9	0.698	6419	6.83	0	0.06
CP023154	1426482	1426632	+	1919.3	0.812	5547	5.05	0	0.07
CP023154	1431508	1431658	+	1447.2	0.803	3927	7.03	0	0.07
CP023154	1452135	1452285	+	4473.9	0.897	12154	17.92	0	0.08
CP023154	1454868	1455018	+	3527	0.897	9586	13.54	0	0.04
CP023154	1463454	1463604	+	894.9	0.693	2411	4.89	0	0.13
CP023154	1469128	1469278	+	2634.8	0.469	7109	10.37	0	0.06
CP023154	1470733	1470883	+	2382.4	0.629	6669	9.32	0	0.08
CP023154	1476462	1476612	+	6952.7	0.881	19406	44.44	0	0.09
CP023154	1486397	1486547	+	5369.1	0.773	14255	30.23	0	0.03
CP023154	1491422	1491572	+	1401.2	0.88	3951	5.19	0	0.1
CP023154	1492890	1493040	+	2489.8	0.667	6660	10.38	0	0.05
CP023154	1493663	1493813	+	1052	0.655	2884	4.13	0	0.14
CP023154	1499971	1500121	+	2113	0.834	5733	9.67	0	0.07
CP023154	1503642	1503792	+	1192.5	0.66	3290	4.86	0	0.14
CP023154	1508114	1508264	+	2308.2	0.589	6142	12.74	0	0.05
CP023154	1509069	1509219	+	1511.3	0.762	4028	8.89	0	0.08
CP023154	1515251	1515401	+	884.3	0.679	2375	5.83	0	0.22
CP023154	1516710	1516860	+	1119.4	0.432	3004	5.94	0	0.09
CP023154	1521761	1521911	+	1946.1	0.77	5312	6.73	0	0.08
CP023154	1522388	1522538	+	1622.8	0.623	4544	5.53	0	0.07
CP023154	1533996	1534146	+	1241.9	0.747	3654	6.58	0	0.08
CP023154	1534626	1534776	+	1142.8	0.708	3362	6.02	0	0.1
CP023154	1538243	1538393	+	905.8	0.87	2582	4.43	0	0.11
CP023154	1545648	1545798	+	16316.5	0.917	44341	21.6	0	0.02
CP023154	1547052	1547202	+	8667.5	0.741	22929	9.58	0	0.03
CP023154	1552468	1552618	+	4090.3	0.602	11121	7.77	0	0.04
CP023154	1554326	1554476	+	2834.9	0.539	7593	4.88	0	0.05
CP023154	1559082	1559232	+	1652.6	0.635	4417	4.65	0	0.09
CP023154	1567024	1567174	+	14202.7	0.934	43337	31.73	0	0.03
CP023154	1572949	1573099	+	720.8	0.502	2126	4.53	0	0.29
CP023154	1574179	1574329	+	1414.1	0.802	3813	6.94	0	0.08
CP023154	1578224	1578374	+	3559.1	0.535	9864	19.24	0	0.05
CP023154	1584519	1584669	+	53702.5	0.804	139016	68.7	0	0.01
CP023154	1598135	1598285	+	2907.6	0.747	7936	10.52	0	0.05
CP023154	1600355	1600505	+	1529.4	0.753	4628	6.09	0	0.09
CP023154	1600845	1600995	+	1406.5	0.651	4206	5.5	0	0.09
CP023154	1603138	1603288	+	1132.2	0.665	3307	4.86	0	0.08
CP023154	1608275	1608425	+	1251.3	0.659	3416	5.57	0	0.09
CP023154	1608812	1608962	+	2246.4	0.824	6857	10.35	0	0.06
CP023154	1616685	1616835	+	19319	0.893	54540	31.22	0	0.03
CP023154	1625028	1625178	+	1211.7	0.567	3221	7.77	0	0.09
CP023154	1628252	1628402	+	1125.1	0.421	3032	6.94	0	0.1
CP023154	1631792	1631942	+	875.6	0.848	2342	6.28	0	0.11
CP023154	1636529	1636679	+	591.5	0.898	1570	4.14	0	0.15
CP023154	1636972	1637122	+	636	0.629	1742	5.05	0	0.13
CP023154	1641372	1641522	+	735.9	0.623	2024	4.83	0	0.14
CP023154	1655724	1655874	+	58574.3	0.959	149721	109.39	0	0.01
CP023154	1662528	1662678	+	1577.6	0.747	4434	7.9	0	0.07
CP023154	1666840	1666990	+	1196.7	0.923	3270	6.29	0	0.31
CP023154	1673282	1673432	+	961.2	0.643	2585	4.91	0	0.1
CP023154	1681958	1682108	+	6309.2	0.482	17207	12.17	0	0.03
CP023154	1682627	1682777	+	4747.8	0.54	14902	8.88	0	0.04
CP023154	1695900	1696050	+	2441.2	0.639	6565	8.99	0	0.05
CP023154	1697914	1698064	+	3104.7	0.851	8336	11.82	0	0.04
CP023154	1698784	1698934	+	1356.8	0.724	4097	4.59	0	0.1
CP023154	1706346	1706496	+	853.8	0.66	2324	6.16	0	0.11
CP023154	1712105	1712255	+	8765	0.759	24398	22.02	0	0.03
CP023154	1714311	1714461	+	6697.6	0.79	18872	14.22	0	0.03
CP023154	1725996	1726146	+	3662.3	0.828	9973	12.23	0	0.04
CP023154	1726362	1726512	+	3466.4	0.854	9235	10.86	0	0.05
CP023154	1731579	1731729	+	1378.6	0.873	3774	6.54	0	0.11
CP023154	1732875	1733025	+	1472.5	0.843	3938	6.87	0	0.08
CP023154	1735558	1735708	+	1937	0.92	5174	8.89	0	0.08
CP023154	1746765	1746915	+	2607.7	0.731	7886	14.54	0	0.06
CP023154	1748571	1748721	+	2038	0.764	5481	11.44	0	0.06
CP023154	1752544	1752694	+	1020.3	0.423	2708	7.28	0	0.08
CP023154	1759822	1759972	+	749	0.636	2005	6.57	0	0.17
CP023154	1765411	1765561	+	803.7	0.502	2141	5.81	0	0.13
CP023154	1767018	1767168	+	578	0.733	1536	4.1	0	0.18
CP023154	1772474	1772624	+	15268.3	0.849	40006	31.83	0	0.02
CP023154	1774154	1774304	+	6710.8	0.703	17970	10.49	0	0.03
CP023154	1779934	1780084	+	3594.5	0.59	9749	6.9	0	0.05
CP023154	1781511	1781661	+	9687	0.775	26644	24	0	0.02
CP023154	1789346	1789496	+	5597.1	0.707	15201	5.39	0	0.03
CP023154	1792254	1792404	+	18486.3	0.876	49206	20.57	0	0.03
CP023154	1796980	1797130	+	2574.5	0.537	6833	4.27	0	0.05
CP023154	1803081	1803231	+	841	0.735	2247	4.36	0	0.14
CP023154	1808520	1808670	+	1965.3	0.69	5559	4.18	0	0.07
CP023154	1809631	1809781	+	3041.4	0.862	8086	6.58	0	0.04
CP023154	1810497	1810647	+	5335.2	0.945	14204	12.47	0	0.07
CP023154	1816154	1816304	+	2337.9	0.655	6287	10.65	0	0.06
CP023154	1828090	1828240	+	9199.8	0.959	26983	33.16	0	0.04
CP023154	1832340	1832490	+	1575.7	0.401	4244	4.28	0	0.09
CP023154	1842868	1843018	+	662	0.867	1806	4.15	0	0.13
CP023154	1844001	1844151	+	928	0.698	2643	5.51	0	0.16
CP023154	1845692	1845842	+	867	0.712	2374	5.18	0	0.16
CP023154	1847972	1848122	+	853.4	0.715	2271	4.53	0	0.26
CP023154	1852714	1852864	+	865.1	0.814	2447	4.01	0	0.11
CP023154	1854302	1854452	+	2051.6	0.951	5558	11.56	0	0.07
CP023154	1857048	1857198	+	1050.1	0.638	3068	4.97	0	0.1
CP023154	1860128	1860278	+	770.9	0.262	2067	4.58	0	0.12
CP023154	1865705	1865855	+	907.7	0.895	2466	5.7	0	0.15
CP023154	1879119	1879269	+	1775.8	0.755	4811	6.61	0	0.12
CP023154	1880071	1880221	+	2179.3	0.725	6548	8.48	0	0.07
CP023154	1880567	1880717	+	2608.4	0.63	6969	9.39	0	0.05
CP023154	1886022	1886172	+	1492.4	0.577	3985	4.16	0	0.07
CP023154	1888957	1889107	+	10741.3	0.927	25051	60.6	0	0.09

## Sheet: homer SmAP-Strep 2
Table S1. Homer output from replicate 2 of SmAP co-purified RNAs mapped to the P. furiosus genome.
chr	start	end	strand	score	focus ratio/other	Total Tags	Background	Fold Change	p-value
CP023154	518	668	-	1130.2	0.936	3762	10.45	0	0.08
CP023154	1324	1474	-	894.7	0.934	2887	7.17	0	0.12
CP023154	8180	8330	-	1297.2	0.697	4169	5.78	0	0.07
CP023154	10798	10948	-	2255.2	0.561	7195	8.63	0	0.09
CP023154	14503	14653	-	2911.5	0.862	9581	14.26	0	0.07
CP023154	25644	25794	-	796.4	0.798	2645	4.61	0	0.1
CP023154	26276	26426	-	799.6	0.588	2499	4.82	0	0.12
CP023154	33016	33166	-	8436.7	0.725	28726	16.09	0	0.03
CP023154	35020	35170	-	3165.9	0.85	10000	4.82	0	0.04
CP023154	36094	36244	-	3378.1	0.878	11011	5.1	0	0.04
CP023154	41102	41252	-	1635.8	0.776	5212	5.86	0	0.07
CP023154	48082	48232	-	1154.8	0.696	3662	5.1	0	0.09
CP023154	49221	49371	-	3236.3	0.949	10432	16.67	0	0.05
CP023154	60719	60869	-	2495.2	0.66	7822	10.51	0	0.04
CP023154	61057	61207	-	1296.6	0.837	4344	5.22	0	0.13
CP023154	66875	67025	-	1367.3	0.555	4330	8.46	0	0.07
CP023154	68912	69062	-	1129.2	0.728	3566	5.14	0	0.15
CP023154	71991	72141	-	983.3	0.808	3189	5.31	0	0.11
CP023154	72674	72824	-	1194.5	0.821	3785	6.52	0	0.1
CP023154	79865	80015	-	1167.9	0.788	3863	5.09	0	0.08
CP023154	86269	86419	-	21754.5	0.564	68790	36.26	0	0.02
CP023154	86768	86918	-	6600	0.543	20721	7.83	0	0.03
CP023154	102998	103148	-	4209.1	0.906	13376	13.04	0	0.05
CP023154	107237	107387	-	3921.4	0.764	13641	8.04	0	0.04
CP023154	110609	110759	-	1799	0.715	5649	4.53	0	0.08
CP023154	111844	111994	-	1816.6	0.923	6207	4.65	0	0.09
CP023154	118288	118438	-	2215.9	0.671	6978	12.12	0	0.06
CP023154	120096	120246	-	612.5	0.571	1946	4.05	0	0.12
CP023154	138949	139099	-	2444.7	0.596	7704	10.87	0	0.05
CP023154	146245	146395	-	7459.2	0.677	23370	18.22	0	0.03
CP023154	153174	153324	-	3511.8	0.838	11366	7.93	0	0.04
CP023154	153727	153877	-	4521.4	0.5	14151	10.96	0	0.05
CP023154	159395	159545	-	705.6	0.607	2210	4.41	0	0.13
CP023154	165177	165327	-	2082.8	0.721	6546	12.01	0	0.06
CP023154	165604	165754	-	1033.2	0.81	3425	5.19	0	0.09
CP023154	186909	187059	-	596.1	0.512	1905	4.16	0	0.11
CP023154	193801	193951	-	733.7	0.65	2456	4.24	0	0.14
CP023154	196200	196350	-	996.8	0.434	3121	6.56	0	0.09
CP023154	197793	197943	-	1576.9	0.886	5032	12.02	0	0.08
CP023154	203813	203963	-	839	0.777	2666	6.84	0	0.16
CP023154	204247	204397	-	618.8	0.76	1964	4.92	0	0.16
CP023154	204859	205009	-	714.8	0.842	2275	4.41	0	0.2
CP023154	209885	210035	-	3522.7	0.781	11050	6.76	0	0.04
CP023154	210680	210830	-	5434	0.667	17350	10.91	0	0.03
CP023154	211394	211544	-	3380.6	0.799	13031	6.16	0	0.05
CP023154	216610	216760	-	1583.3	0.678	4962	5.61	0	0.06
CP023154	217247	217397	-	1616.9	0.563	5284	6.24	0	0.06
CP023154	222408	222558	-	1736.6	0.903	5457	12.26	0	0.08
CP023154	230216	230366	-	1978.5	0.66	6786	5.83	0	0.06
CP023154	231624	231774	-	2007.9	0.866	6539	5.62	0	0.09
CP023154	233539	233689	-	1965.7	0.729	6317	5.78	0	0.09
CP023154	239701	239851	-	935	0.723	2944	5.36	0	0.09
CP023154	248252	248402	-	1241.9	0.676	3958	6.46	0	0.07
CP023154	256394	256544	-	4106	0.955	12862	28.88	0	0.06
CP023154	259546	259696	-	930.5	0.512	2976	5.07	0	0.09
CP023154	266754	266904	-	576.6	0.425	1813	4.02	0	0.14
CP023154	267147	267297	-	1216.3	0.777	3894	8.9	0	0.08
CP023154	272501	272651	-	889.2	0.738	2831	7.48	0	0.09
CP023154	280169	280319	-	775	0.884	2519	5.98	0	0.13
CP023154	287248	287398	-	1384.9	0.633	4347	7.83	0	0.08
CP023154	290045	290195	-	907.2	0.411	2921	4.31	0	0.11
CP023154	296348	296498	-	779.2	0.472	2545	4.55	0	0.21
CP023154	299609	299759	-	842.8	0.757	2719	5.32	0	0.11
CP023154	304322	304472	-	1202.8	0.854	3832	8.37	0	0.09
CP023154	310757	310907	-	3494.9	0.863	11109	18.78	0	0.07
CP023154	311125	311275	-	1229.1	0.637	3841	5.52	0	0.08
CP023154	317044	317194	-	2879.2	0.557	8999	12.61	0	0.07
CP023154	319071	319221	-	5288.4	0.907	17477	26.24	0	0.03
CP023154	325111	325261	-	720	0.711	2308	4.83	0	0.11
CP023154	332327	332477	-	599.7	0.638	1891	4.33	0	0.14
CP023154	335501	335651	-	1429.7	0.87	4882	6.55	0	0.08
CP023154	342280	342430	-	3496.5	0.723	10927	7.71	0	0.04
CP023154	345130	345280	-	3658.4	0.88	9626	6.41	0	0.14
CP023154	349923	350073	-	6534.7	0.675	22122	9.8	0	0.03
CP023154	351151	351301	-	11445.8	0.95	37749	20.13	0	0.05
CP023154	351694	351844	-	5408.7	0.814	17143	8.17	0	0.03
CP023154	358174	358324	-	1060.4	0.882	3366	6.67	0	0.18
CP023154	366618	366768	-	867.8	0.868	2742	6.32	0	0.1
CP023154	371729	371879	-	869.4	0.52	2839	6.05	0	0.12
CP023154	373151	373301	-	987.2	0.825	3096	7.03	0	0.07
CP023154	379603	379753	-	895	0.692	2848	6.27	0	0.14
CP023154	385420	385570	-	785.2	0.843	2474	6.07	0	0.1
CP023154	391646	391796	-	2191.6	0.614	6986	9.86	0	0.05
CP023154	391999	392149	-	2125	0.833	6756	9.03	0	0.06
CP023154	403842	403992	-	1983.6	0.889	6312	7.99	0	0.06
CP023154	405745	405895	-	1778.5	0.627	5744	5.58	0	0.06
CP023154	406959	407109	-	1876.4	0.855	5907	5.75	0	0.06
CP023154	409564	409714	-	1220.1	0.648	3848	4.27	0	0.09
CP023154	410990	411140	-	1113.9	0.703	3586	4.47	0	0.11
CP023154	418114	418264	-	779.5	0.622	2580	6.01	0	0.12
CP023154	418459	418609	-	557.1	0.619	1757	4.16	0	0.14
CP023154	433976	434126	-	977.2	0.65	3234	6.24	0	0.11
CP023154	441910	442060	-	833.2	0.521	2788	5.18	0	0.1
CP023154	447912	448062	-	5083.3	0.793	18028	6.37	0	0.04
CP023154	448900	449050	-	14794.2	0.641	46323	19.61	0	0.02
CP023154	454603	454753	-	1815	0.799	5686	4.9	0	0.06
CP023154	455360	455510	-	2744.8	0.886	8874	6.55	0	0.06
CP023154	460365	460515	-	4710.8	0.874	15731	13.87	0	0.06
CP023154	460760	460910	-	1976.2	0.676	6295	5.32	0	0.07
CP023154	466470	466620	-	1773.7	0.664	5696	4.51	0	0.06
CP023154	469451	469601	-	3971.6	0.677	12825	12.54	0	0.06
CP023154	479792	479942	-	15284.1	0.756	48819	26.5	0	0.02
CP023154	486961	487111	-	906.8	0.639	2851	4.57	0	0.09
CP023154	504274	504424	-	2422	0.75	7578	4.99	0	0.05
CP023154	504905	505055	-	8133.4	0.929	27659	19.95	0	0.03
CP023154	510559	510709	-	1168.9	0.874	3664	6.19	0	0.08
CP023154	512340	512490	-	1463	0.667	5083	7.12	0	0.07
CP023154	516170	516320	-	1630.3	0.601	5150	9.58	0	0.07
CP023154	521841	521991	-	1052.4	0.561	3334	5.42	0	0.12
CP023154	522434	522584	-	945.9	0.622	3046	4.77	0	0.12
CP023154	526537	526687	-	909.1	0.87	2856	4.93	0	0.12
CP023154	538319	538469	-	1036.4	0.925	3295	9.88	0	0.23
CP023154	539058	539208	-	702	0.803	2268	6.4	0	0.13
CP023154	547389	547539	-	4076.3	0.771	12955	21.2	0	0.04
CP023154	555933	556083	-	4119.5	0.894	14826	14.48	0	0.04
CP023154	560436	560586	-	1200.9	0.528	3774	4.16	0	0.08
CP023154	563358	563508	-	2673.1	0.865	8380	17.45	0	0.09
CP023154	571471	571621	-	668.8	0.796	2215	5.82	0	0.11
CP023154	574538	574688	-	886.7	0.734	2778	6.85	0	0.11
CP023154	589050	589200	-	3230.6	0.878	11206	19.15	0	0.06
CP023154	590431	590581	-	1475.4	0.812	4952	7.67	0	0.07
CP023154	597377	597527	-	2635.4	0.762	8949	12.95	0	0.06
CP023154	605738	605888	-	2470.3	0.833	7454	4.38	0	0.37
CP023154	607020	607170	-	17132.3	0.955	18086	52.9	0	0.27
CP023154	613659	613809	-	1231.6	0.751	4076	8.26	0	0.13
CP023154	621751	621901	-	816.3	0.79	2593	4.27	0	0.1
CP023154	625551	625701	-	1477.7	0.718	4642	9.96	0	0.06
CP023154	638155	638305	-	1526.3	0.723	4892	8.31	0	0.07
CP023154	645548	645698	-	1206	0.768	3838	6.65	0	0.09
CP023154	650571	650721	-	1698.8	0.818	5598	9.54	0	0.06
CP023154	656792	656942	-	998.4	0.61	3128	4.93	0	0.08
CP023154	657348	657498	-	1356.4	0.61	4355	6.7	0	0.07
CP023154	661826	661976	-	857.2	0.807	2710	4.02	0	0.2
CP023154	672934	673084	-	790.7	0.819	2627	6.76	0	0.13
CP023154	673790	673940	-	556.1	0.539	1834	4.12	0	0.19
CP023154	679192	679342	-	687.3	0.512	2228	4.42	0	0.15
CP023154	693817	693967	-	1704.9	0.541	5348	5.79	0	0.07
CP023154	694263	694413	-	2056.2	0.654	6496	7.11	0	0.05
CP023154	694888	695038	-	1468.1	0.657	4655	4.87	0	0.06
CP023154	697184	697334	-	1623.9	0.735	5075	5.58	0	0.06
CP023154	714065	714215	-	2431.9	0.881	7676	5.79	0	0.07
CP023154	714652	714802	-	8936.8	0.887	29879	26.91	0	0.03
CP023154	733770	733920	-	1874.5	0.872	5867	6.28	0	0.07
CP023154	739632	739782	-	3808.1	0.88	12070	27.5	0	0.04
CP023154	754480	754630	-	1108.1	0.824	3568	4.95	0	0.09
CP023154	758485	758635	-	2659.4	0.81	8531	6.26	0	0.05
CP023154	764135	764285	-	2988.3	0.773	11404	6.33	0	0.09
CP023154	771726	771876	-	762.2	0.812	2584	5.66	0	0.16
CP023154	781555	781705	-	5936.3	0.729	21020	27.67	0	0.04
CP023154	790777	790927	-	4473.7	0.822	13998	9.72	0	0.04
CP023154	793591	793741	-	2929.8	0.551	9376	6.18	0	0.05
CP023154	794322	794472	-	5947.2	0.872	18808	14.01	0	0.04
CP023154	799522	799672	-	827.2	0.714	2915	5.95	0	0.13
CP023154	808188	808338	-	780.4	0.659	2469	4.33	0	0.1
CP023154	811034	811184	-	1014	0.838	3227	6.32	0	0.1
CP023154	816212	816362	-	966.4	0.823	3184	7.05	0	0.1
CP023154	827011	827161	-	1582.6	0.764	5316	4.85	0	0.08
CP023154	831161	831311	-	2024.9	0.758	6506	4.7	0	0.07
CP023154	837306	837456	-	10564	0.921	31963	20.11	0	0.03
CP023154	837641	837791	-	9959.8	0.895	31229	18.48	0	0.02
CP023154	843855	844005	-	921.2	0.564	2879	5.81	0	0.1
CP023154	852576	852726	-	29405.9	0.632	86711	75.59	0	0.02
CP023154	859304	859454	-	1157.4	0.805	3626	8.45	0	0.11
CP023154	872336	872486	-	863.6	0.759	2754	4.99	0	0.11
CP023154	873664	873814	-	748.8	0.733	2403	4.37	0	0.11
CP023154	876865	877015	-	1349.7	0.789	4321	8.24	0	0.07
CP023154	881898	882048	-	792.3	0.74	2602	5.67	0	0.1
CP023154	890729	890879	-	816	0.707	2555	6.02	0	0.15
CP023154	900718	900868	-	1502.6	0.636	4768	4.97	0	0.07
CP023154	903642	903792	-	2650.4	0.63	8283	4.15	0	0.05
CP023154	907612	907762	-	12293.8	0.864	38658	20.02	0	0.03
CP023154	909866	910016	-	3246.2	0.88	10575	4.77	0	0.04
CP023154	912987	913137	-	2513.8	0.747	8095	6.46	0	0.05
CP023154	920122	920272	-	1184.9	0.489	3723	5.49	0	0.1
CP023154	921759	921909	-	914.2	0.544	2871	4.02	0	0.11
CP023154	923173	923323	-	1233.9	0.851	3902	5.11	0	0.07
CP023154	930263	930413	-	2949.3	0.836	9959	6.06	0	0.05
CP023154	932801	932951	-	2703.9	0.718	8681	4.71	0	0.04
CP023154	933921	934071	-	2454.9	0.586	8178	4.84	0	0.05
CP023154	935991	936141	-	2205	0.519	7045	5.24	0	0.06
CP023154	948659	948809	-	649.2	0.42	2031	4.41	0	0.13
CP023154	957500	957650	-	1606.3	0.785	5039	4.87	0	0.14
CP023154	959543	959693	-	6136.3	0.858	19468	20.18	0	0.06
CP023154	962900	963050	-	1570.8	0.811	5177	5.26	0	0.07
CP023154	969206	969356	-	1619.8	0.817	5090	5.84	0	0.08
CP023154	969781	969931	-	1581.7	0.619	4996	5.6	0	0.1
CP023154	971463	971613	-	1609.8	0.693	5237	4.73	0	0.08
CP023154	972263	972413	-	1530.8	0.949	5208	4.38	0	0.08
CP023154	974005	974155	-	1759.6	0.828	6482	5.23	0	0.07
CP023154	975869	976019	-	2177.5	0.774	6811	7.19	0	0.06
CP023154	979586	979736	-	1444.4	0.577	4529	5.42	0	0.09
CP023154	983433	983583	-	1178.5	0.783	3999	5.94	0	0.07
CP023154	984020	984170	-	1109.1	0.526	3901	5.48	0	0.14
CP023154	992752	992902	-	929.9	0.434	2974	5.93	0	0.09
CP023154	995066	995216	-	882.8	0.904	2771	5.22	0	0.11
CP023154	1001375	1001525	-	734.4	0.784	2313	4.85	0	0.12
CP023154	1006123	1006273	-	612.8	0.563	1939	4.36	0	0.12
CP023154	1017450	1017600	-	2183.9	0.86	6887	11.35	0	0.05
CP023154	1019622	1019772	-	1321.2	0.529	4522	5.28	0	0.08
CP023154	1023043	1023193	-	1299.5	0.749	4105	6.11	0	0.07
CP023154	1033627	1033777	-	2843.4	0.885	9325	11.98	0	0.06
CP023154	1034576	1034726	-	1932.4	0.696	6543	7.95	0	0.07
CP023154	1041786	1041936	-	2768.2	0.611	9039	7.17	0	0.05
CP023154	1042169	1042319	-	1910.3	0.498	6349	4.69	0	0.06
CP023154	1043153	1043303	-	2394.8	0.8	7809	4.05	0	0.07
CP023154	1048250	1048400	-	50290	0.905	63548	57.05	0	0.08
CP023154	1048703	1048853	-	6660.8	0.938	16394	4.25	0	0.2
CP023154	1064691	1064841	-	7051.5	0.96	23005	28.29	0	0.04
CP023154	1071324	1071474	-	5382.8	0.595	16841	11.34	0	0.04
CP023154	1073759	1073909	-	2239.6	0.565	7059	4.3	0	0.07
CP023154	1074477	1074627	-	2925	0.894	9196	5.76	0	0.16
CP023154	1074881	1075031	-	6346.9	0.763	17313	14.04	0	0.23
CP023154	1092840	1092990	-	920.9	0.688	2880	5.56	0	0.1
CP023154	1102523	1102673	-	862.4	0.791	2794	4.78	0	0.1
CP023154	1108971	1109121	-	3538.1	0.544	12315	12.43	0	0.05
CP023154	1119735	1119885	-	4513.7	0.663	14321	18.89	0	0.03
CP023154	1121833	1121983	-	2051.1	0.529	6476	6.71	0	0.06
CP023154	1124757	1124907	-	1449.2	0.823	4773	6.65	0	0.08
CP023154	1131093	1131243	-	985.9	0.802	3092	5.49	0	0.09
CP023154	1138949	1139099	-	15770.1	0.813	49743	54.73	0	0.02
CP023154	1157144	1157294	-	881.2	0.66	2763	5.47	0	0.11
CP023154	1159769	1159919	-	700.8	0.67	2194	4.08	0	0.11
CP023154	1161081	1161231	-	668.4	0.78	2169	4.05	0	0.16
CP023154	1170381	1170531	-	828.1	0.27	2599	6.4	0	0.13
CP023154	1176029	1176179	-	1586.5	0.662	5000	10.84	0	0.06
CP023154	1178745	1178895	-	840	0.656	2683	4.77	0	0.11
CP023154	1185976	1186126	-	5184.7	0.913	16935	19.7	0	0.03
CP023154	1186830	1186980	-	1946.1	0.88	6288	6.07	0	0.09
CP023154	1193635	1193785	-	54169.5	0.572	120043	35.28	0	0.02
CP023154	1194762	1194912	-	32734.1	0.671	85905	17.58	0	0.02
CP023154	1206632	1206782	-	3487.2	0.772	10919	12.9	0	0.06
CP023154	1211268	1211418	-	2383.6	0.713	7507	4.73	0	0.08
CP023154	1212806	1212956	-	2636.7	0.842	8427	6.32	0	0.05
CP023154	1223748	1223898	-	601.6	0.696	1887	4.34	0	0.18
CP023154	1230216	1230366	-	2201.8	0.904	7144	12.73	0	0.07
CP023154	1230806	1230956	-	982	0.813	3090	5.08	0	0.09
CP023154	1237082	1237232	-	643.5	0.69	2015	6.96	0	0.13
CP023154	1242541	1242691	-	4834.6	0.92	16664	6.99	0	0.04
CP023154	1243920	1244070	-	10287.5	0.929	31628	16.32	0	0.06
CP023154	1245743	1245893	-	5786	0.756	19226	5.22	0	0.03
CP023154	1249524	1249674	-	13792.3	0.926	47610	21.73	0	0.02
CP023154	1252113	1252263	-	2629	0.788	8351	4.53	0	0.06
CP023154	1260816	1260966	-	1037.7	0.635	3291	5.01	0	0.1
CP023154	1266795	1266945	-	1871.3	0.816	6042	9.15	0	0.06
CP023154	1272335	1272485	-	1873.2	0.68	5859	4.52	0	0.06
CP023154	1275288	1275438	-	10599.5	0.725	36856	32.12	0	0.02
CP023154	1283839	1283989	-	1755.4	0.778	5816	9.03	0	0.09
CP023154	1284737	1284887	-	780.4	0.82	2538	4.29	0	0.14
CP023154	1285534	1285684	-	891.8	0.81	2935	4.38	0	0.11
CP023154	1289825	1289975	-	1474.8	0.813	4616	4.54	0	0.08
CP023154	1291421	1291571	-	7171.8	0.802	23875	32.85	0	0.03
CP023154	1304970	1305120	-	1271.6	0.861	4053	8.33	0	0.12
CP023154	1310952	1311102	-	899.5	0.605	2829	5.49	0	0.1
CP023154	1316435	1316585	-	1075.5	0.859	3454	4.72	0	0.14
CP023154	1317977	1318127	-	1180.1	0.723	3708	5.18	0	0.09
CP023154	1319480	1319630	-	1522.8	0.848	4903	7.17	0	0.07
CP023154	1330251	1330401	-	2830.6	0.674	9600	7.36	0	0.05
CP023154	1332150	1332300	-	6019.9	0.53	19513	18.72	0	0.04
CP023154	1338713	1338863	-	1042.5	0.742	3334	4.79	0	0.11
CP023154	1345101	1345251	-	1649.5	0.55	5332	6.22	0	0.09
CP023154	1346470	1346620	-	1487	0.576	4652	5.72	0	0.07
CP023154	1350152	1350302	-	1092.1	0.791	3577	5.58	0	0.09
CP023154	1361077	1361227	-	2311.6	0.463	7260	7.29	0	0.05
CP023154	1361569	1361719	-	2997.3	0.659	9609	9.74	0	0.04
CP023154	1375369	1375519	-	6274.6	0.644	20193	23.07	0	0.03
CP023154	1383150	1383300	-	809.6	0.674	2772	4.47	0	0.1
CP023154	1387568	1387718	-	898.5	0.887	2821	4.81	0	0.12
CP023154	1395874	1396024	-	699.2	0.819	2186	4.08	0	0.17
CP023154	1402963	1403113	-	1736.2	0.665	6327	8.59	0	0.14
CP023154	1408602	1408752	-	17210.7	0.935	59094	33.75	0	0.02
CP023154	1409350	1409500	-	5466.3	0.579	17164	7.85	0	0.03
CP023154	1416406	1416556	-	5176.1	0.503	16659	12.49	0	0.04
CP023154	1417161	1417311	-	1922.1	0.565	6042	4.27	0	0.06
CP023154	1417591	1417741	-	3498.7	0.938	11765	8.09	0	0.05
CP023154	1424245	1424395	-	6688	0.552	22462	12.76	0	0.03
CP023154	1427432	1427582	-	3377.8	0.576	10942	6.22	0	0.06
CP023154	1427842	1427992	-	3847.8	0.469	12562	7.39	0	0.04
CP023154	1435572	1435722	-	1556.1	0.601	4996	4.38	0	0.07
CP023154	1436599	1436749	-	1608.9	0.84	5311	4.49	0	0.07
CP023154	1437104	1437254	-	2672.5	0.841	8788	7.85	0	0.07
CP023154	1439683	1439833	-	1780.1	0.917	5963	4.93	0	0.06
CP023154	1447615	1447765	-	2107.1	0.813	6639	5.15	0	0.08
CP023154	1450688	1450838	-	6193.6	0.955	22867	17.2	0	0.05
CP023154	1456283	1456433	-	3601.1	0.933	12014	12.99	0	0.06
CP023154	1457161	1457311	-	1857.2	0.813	5813	6.12	0	0.06
CP023154	1464396	1464546	-	1388.1	0.825	4340	5.22	0	0.08
CP023154	1466221	1466371	-	2305.2	0.865	7797	8.91	0	0.06
CP023154	1470538	1470688	-	1698.8	0.551	5333	6.29	0	0.07
CP023154	1477106	1477256	-	11043.6	0.423	34543	21.43	0	0.02
CP023154	1482846	1482996	-	1636.1	0.568	5413	7.97	0	0.07
CP023154	1488877	1489027	-	1549.4	0.594	4855	5.97	0	0.07
CP023154	1490309	1490459	-	1727	0.858	5879	5.85	0	0.07
CP023154	1498108	1498258	-	2043.7	0.911	6678	6.14	0	0.08
CP023154	1499054	1499204	-	2182.9	0.797	7117	6.65	0	0.07
CP023154	1500648	1500798	-	1834.2	0.84	5772	5.98	0	0.07
CP023154	1508015	1508165	-	1678.6	0.412	5394	7.38	0	0.06
CP023154	1508530	1508680	-	1026.8	0.862	3403	4.33	0	0.1
CP023154	1514477	1514627	-	10160.5	0.965	33966	10.07	0	0.04
CP023154	1516651	1516801	-	10038.2	0.824	33205	9.57	0	0.03
CP023154	1518873	1519023	-	7710.7	0.807	25475	7.06	0	0.04
CP023154	1526473	1526623	-	689.2	0.915	2168	4.17	0	0.15
CP023154	1534180	1534330	-	870	0.723	2752	5	0	0.14
CP023154	1541047	1541197	-	4832.4	0.973	13800	21.63	0	0.17
CP023154	1554750	1554900	-	981.4	0.914	3069	6.7	0	0.09
CP023154	1560390	1560540	-	628.1	0.767	2149	4.74	0	0.15
CP023154	1572941	1573091	-	4261.9	0.524	14724	16.76	0	0.04
CP023154	1578144	1578294	-	3765.9	0.662	11242	10.98	0	0.07
CP023154	1578478	1578628	-	1819.8	0.63	5687	4.89	0	0.05
CP023154	1579630	1579780	-	1671.3	0.743	5567	4.45	0	0.07
CP023154	1591466	1591616	-	7944.6	0.978	15451	36.34	0	0.11
CP023154	1600916	1601066	-	967.6	0.802	3400	4.38	0	0.1
CP023154	1601789	1601939	-	1435.1	0.874	4844	6.53	0	0.11
CP023154	1618488	1618638	-	5467.9	0.915	18414	13.25	0	0.05
CP023154	1619448	1619598	-	3336.2	0.561	11761	7.57	0	0.04
CP023154	1627681	1627831	-	14235.8	0.839	43823	24.28	0	0.02
CP023154	1636591	1636741	-	4520.1	0.939	14576	6.22	0	0.04
CP023154	1637119	1637269	-	3243.7	0.655	10272	4.39	0	0.04
CP023154	1637939	1638089	-	6329.3	0.919	20743	9.14	0	0.04
CP023154	1639392	1639542	-	4748.9	0.59	15682	6.51	0	0.04
CP023154	1648041	1648191	-	1023.6	0.572	3327	4.34	0	0.09
CP023154	1652169	1652319	-	2861.9	0.961	9584	8.13	0	0.05
CP023154	1653239	1653389	-	5166.5	0.514	16606	17.17	0	0.03
CP023154	1658796	1658946	-	2345.8	0.826	7557	5.92	0	0.06
CP023154	1662978	1663128	-	3883.6	0.913	12300	12.99	0	0.05
CP023154	1663481	1663631	-	5753	0.768	17196	21.13	0	0.05
CP023154	1674046	1674196	-	994.2	0.868	3283	5.02	0	0.1
CP023154	1675608	1675758	-	1007.6	0.418	3183	4.4	0	0.1
CP023154	1682539	1682689	-	4262.8	0.569	13758	17.56	0	0.06
CP023154	1683622	1683772	-	2567.9	0.869	8343	6.79	0	0.09
CP023154	1688042	1688192	-	4641.4	0.947	14947	16.46	0	0.05
CP023154	1688906	1689056	-	1576.2	0.85	5424	5.61	0	0.07
CP023154	1691918	1692068	-	1427.1	0.741	4577	4.87	0	0.1
CP023154	1699778	1699928	-	329770	0.983	822347	256.42	0	0.01
CP023154	1705649	1705799	-	660.4	0.658	2103	4.27	0	0.11
CP023154	1715643	1715793	-	2084.1	0.398	6813	7.45	0	0.06
CP023154	1716055	1716205	-	3385.1	0.792	10701	13.17	0	0.05
CP023154	1716612	1716762	-	1533	0.751	4815	5.44	0	0.07
CP023154	1726549	1726699	-	174324	0.94	457277	207.16	0	0.01
CP023154	1736858	1737008	-	802.8	0.776	2546	4.62	0	0.11
CP023154	1737411	1737561	-	820.8	0.707	2726	4.76	0	0.14
CP023154	1742554	1742704	-	1669.4	0.8	5348	9.52	0	0.1
CP023154	1743135	1743285	-	1272.3	0.596	4069	7.44	0	0.08
CP023154	1749697	1749847	-	9975.8	0.942	31278	9.31	0	0.02
CP023154	1756105	1756255	-	29552.2	0.491	95797	12.62	0	0.02
CP023154	1757005	1757155	-	13603.5	0.481	41130	5.38	0	0.03
CP023154	1769917	1770067	-	1602.2	0.917	5078	8.89	0	0.09
CP023154	1779840	1779990	-	3003.7	0.428	9458	18.31	0	0.05
CP023154	1781591	1781741	-	860.4	0.642	2776	4.24	0	0.11
CP023154	1789656	1789806	-	2458.1	0.773	7745	15.61	0	0.09
CP023154	1790335	1790485	-	1303.6	0.567	4514	7.44	0	0.08
CP023154	1796920	1797070	-	679.3	0.305	2323	4.76	0	0.13
CP023154	1798379	1798529	-	914.2	0.873	2946	6.14	0	0.09
CP023154	1808746	1808896	-	1612.7	0.824	5066	10.6	0	0.08
CP023154	1810685	1810835	-	767	0.577	2469	4.34	0	0.14
CP023154	1823203	1823353	-	586.9	0.504	2029	4.26	0	0.14
CP023154	1832265	1832415	-	4176.8	0.698	13729	26.87	0	0.05
CP023154	1832878	1833028	-	1174.3	0.883	4103	5.93	0	0.09
CP023154	1845248	1845398	-	1005.7	0.811	3446	4.91	0	0.13
CP023154	1851173	1851323	-	1085.1	0.816	3524	4.29	0	0.09
CP023154	1851513	1851663	-	2110	0.82	6636	8.96	0	0.05
CP023154	1853026	1853176	-	1235.5	0.591	3925	4.53	0	0.08
CP023154	1853490	1853640	-	1066.2	0.811	3333	4.02	0	0.12
CP023154	1860043	1860193	-	8299.8	0.713	26204	13.67	0	0.03
CP023154	1862409	1862559	-	10210.1	0.925	33324	13.84	0	0.03
CP023154	1867440	1867590	-	27879	0.78	95832	45.58	0	0.02
CP023154	1872130	1872280	-	5116.2	0.824	16017	5.93	0	0.05
CP023154	1879369	1879519	-	13885.7	0.929	39766	19.82	0	0.03
CP023154	1883734	1883884	-	15562.1	0.853	45515	27.68	0	0.05
CP023154	1888908	1889058	-	840.3	0.116	2651	5.64	0	0.09
CP023154	1889260	1889410	-	1246	0.701	3914	8.79	0	0.12
CP023154	11104	11254	+	5051	0.902	15061	8.94	0	0.17
CP023154	11556	11706	+	8732.7	0.928	19666	16.99	0	0.27
CP023154	12630	12780	+	4033.1	0.932	12414	6.7	0	0.14
CP023154	23394	23544	+	6463.7	0.91	23247	36.09	0	0.08
CP023154	31632	31782	+	667.2	0.814	2162	4.39	0	0.17
CP023154	34607	34757	+	533.4	0.666	1723	4.16	0	0.16
CP023154	40380	40530	+	1126.3	0.771	3574	7.58	0	0.08
CP023154	42621	42771	+	1065.5	0.889	3351	5.94	0	0.14
CP023154	48273	48423	+	1261.4	0.581	3971	7.94	0	0.09
CP023154	58804	58954	+	1192.3	0.742	4064	7.02	0	0.09
CP023154	61597	61747	+	1281.5	0.684	4011	7.71	0	0.09
CP023154	66389	66539	+	1041.9	0.82	3258	6.68	0	0.09
CP023154	74015	74165	+	1094.7	0.831	3559	7.65	0	0.09
CP023154	82142	82292	+	1491.1	0.447	4704	8.8	0	0.08
CP023154	89135	89285	+	2021	0.822	6419	8.14	0	0.06
CP023154	94019	94169	+	1212.1	0.584	4173	4.03	0	0.17
CP023154	95465	95615	+	1248.3	0.759	3981	4.5	0	0.1
CP023154	102648	102798	+	828.8	0.798	2615	4.76	0	0.11
CP023154	110872	111022	+	800.3	0.664	2811	5.19	0	0.13
CP023154	114197	114347	+	871	0.826	2772	4.45	0	0.1
CP023154	120618	120768	+	49141.6	0.803	94589	16.39	0	0.05
CP023154	121937	122087	+	20101.7	0.787	59006	5.75	0	0.02
CP023154	124277	124427	+	43030.9	0.952	70684	13.06	0	0.04
CP023154	124987	125137	+	16524	0.818	48430	4.49	0	0.04
CP023154	143308	143458	+	1786.5	0.736	5650	11.09	0	0.09
CP023154	147862	148012	+	741.4	0.642	2324	4.04	0	0.12
CP023154	159359	159509	+	2564	0.592	9627	11.53	0	0.04
CP023154	165218	165368	+	917.7	0.711	3044	4.03	0	0.12
CP023154	166793	166943	+	1395.5	0.753	4509	5.14	0	0.1
CP023154	171668	171818	+	2002.8	0.885	6282	6.84	0	0.15
CP023154	172186	172336	+	3911.5	0.677	12230	16.83	0	0.04
CP023154	185797	185947	+	1519.3	0.829	4864	7.04	0	0.06
CP023154	187157	187307	+	1485	0.866	4979	5.96	0	0.09
CP023154	191779	191929	+	1850.5	0.664	6161	5.33	0	0.06
CP023154	192847	192997	+	5233.3	0.84	16904	19.55	0	0.04
CP023154	196287	196437	+	1619.1	0.628	5235	4.77	0	0.06
CP023154	200713	200863	+	882.5	0.833	2796	5.78	0	0.1
CP023154	202595	202745	+	617.2	0.871	1929	4.34	0	0.13
CP023154	206335	206485	+	1429.4	0.631	4572	13.55	0	0.07
CP023154	218676	218826	+	3866.4	0.749	12098	16.38	0	0.04
CP023154	220400	220550	+	2230.3	0.728	7497	8.42	0	0.05
CP023154	220742	220892	+	1438	0.881	4502	5.48	0	0.07
CP023154	229235	229385	+	2258.1	0.798	7059	13.71	0	0.07
CP023154	232316	232466	+	943.3	0.656	2955	4.73	0	0.1
CP023154	239687	239837	+	2849.5	0.678	9398	8.24	0	0.05
CP023154	244455	244605	+	5404.9	0.953	11114	8.33	0	0.25
CP023154	244767	244917	+	5462.1	0.743	12234	9.01	0	0.21
CP023154	245243	245393	+	3830.9	0.889	8334	6.15	0	0.34
CP023154	245925	246075	+	5632.7	0.731	20448	9.39	0	0.05
CP023154	259060	259210	+	13971.5	0.881	40548	44.8	0	0.03
CP023154	259601	259751	+	2962.4	0.469	10459	6.23	0	0.04
CP023154	265250	265400	+	2691.7	0.751	8491	14.83	0	0.08
CP023154	279198	279348	+	9356	0.958	30251	17.69	0	0.04
CP023154	284513	284663	+	2745.8	0.831	9423	5.7	0	0.06
CP023154	290118	290268	+	1443.8	0.68	4559	8.65	0	0.08
CP023154	295791	295941	+	42771.7	0.973	58516	58.17	0	0.08
CP023154	296418	296568	+	6295.4	0.862	20054	4.9	0	0.14
CP023154	301882	302032	+	1942	0.835	6121	9.21	0	0.07
CP023154	308121	308271	+	1413.7	0.852	4656	8.09	0	0.09
CP023154	317129	317279	+	3503.2	0.569	11203	11	0	0.09
CP023154	322354	322504	+	1180.4	0.736	3957	4.08	0	0.11
CP023154	322980	323130	+	3352.2	0.948	11123	13.1	0	0.05
CP023154	328320	328470	+	1062.7	0.543	3321	6.19	0	0.09
CP023154	331481	331631	+	1043.5	0.681	3278	6.67	0	0.09
CP023154	338798	338948	+	579.2	0.72	1855	4.56	0	0.14
CP023154	346413	346563	+	1135	0.858	3623	7.25	0	0.09
CP023154	347138	347288	+	1255.3	0.477	3950	8.16	0	0.09
CP023154	353075	353225	+	3969.7	0.627	12928	11.44	0	0.05
CP023154	353955	354105	+	4932.2	0.882	15921	15.15	0	0.05
CP023154	364568	364718	+	759.3	0.828	2437	5.04	0	0.15
CP023154	367040	367190	+	745.2	0.774	2389	5.15	0	0.13
CP023154	372055	372205	+	557.1	0.753	1783	4.17	0	0.14
CP023154	377972	378122	+	1730.2	0.625	6005	4.56	0	0.09
CP023154	378523	378673	+	3175.2	0.833	10854	8.72	0	0.05
CP023154	379045	379195	+	2873.1	0.796	9434	7.22	0	0.05
CP023154	384337	384487	+	2065.5	0.775	6523	6.87	0	0.07
CP023154	385327	385477	+	2423.9	0.905	8083	8.96	0	0.06
CP023154	393185	393335	+	1443.8	0.871	4761	8.16	0	0.1
CP023154	399342	399492	+	1079	0.938	3548	4.75	0	0.14
CP023154	401787	401937	+	1437	0.684	4513	6.18	0	0.07
CP023154	404933	405083	+	1379.1	0.653	4320	6.99	0	0.08
CP023154	417390	417540	+	773.1	0.643	2431	4.56	0	0.1
CP023154	423974	424124	+	650.2	0.773	2354	4.68	0	0.14
CP023154	424667	424817	+	977.9	0.692	3105	7.36	0	0.08
CP023154	429199	429349	+	734.4	0.812	2334	5.65	0	0.14
CP023154	431564	431714	+	640.3	0.759	2092	5.09	0	0.14
CP023154	441737	441887	+	2854.6	0.899	9307	19.41	0	0.06
CP023154	450816	450966	+	585.3	0.65	1881	4.8	0	0.14
CP023154	457220	457370	+	1850.5	0.688	5795	9.57	0	0.05
CP023154	459683	459833	+	958	0.698	3005	4.33	0	0.15
CP023154	463469	463619	+	964.8	0.581	3057	5.74	0	0.12
CP023154	487728	487878	+	2281.5	0.655	7155	10.02	0	0.06
CP023154	488044	488194	+	2277.6	0.754	7178	10.09	0	0.06
CP023154	500587	500737	+	7166.7	0.632	22671	30.95	0	0.03
CP023154	508495	508645	+	83487.4	0.888	225971	159.63	0	0.01
CP023154	514425	514575	+	1848.2	0.698	6000	7.72	0	0.06
CP023154	519156	519306	+	1368.9	0.7	4514	5.62	0	0.07
CP023154	525542	525692	+	1626.5	0.726	5099	7.9	0	0.08
CP023154	526279	526429	+	876.8	0.335	2806	4.08	0	0.1
CP023154	527326	527476	+	1192.9	0.79	3932	5.54	0	0.08
CP023154	533922	534072	+	8296.6	0.86	26753	35.67	0	0.03
CP023154	545282	545432	+	796.1	0.571	2530	4.93	0	0.11
CP023154	545678	545828	+	880.9	0.87	2777	5.53	0	0.11
CP023154	560146	560296	+	931.5	0.575	2949	4.52	0	0.1
CP023154	561487	561637	+	902	0.849	2881	4.45	0	0.1
CP023154	570212	570362	+	680	0.565	2260	4.53	0	0.12
CP023154	573674	573824	+	1160.3	0.621	3629	7.17	0	0.09
CP023154	577542	577692	+	1177.9	0.782	3685	6.15	0	0.08
CP023154	585965	586115	+	819.8	0.9	2568	4.87	0	0.09
CP023154	601218	601368	+	764.1	0.669	2404	4.42	0	0.12
CP023154	605172	605322	+	1380.7	0.804	4315	9.96	0	0.08
CP023154	611012	611162	+	947.8	0.78	3098	5.44	0	0.1
CP023154	613414	613564	+	1291.8	0.831	4093	6.52	0	0.08
CP023154	617385	617535	+	1923.1	0.872	6576	8.14	0	0.07
CP023154	619204	619354	+	1318.7	0.504	4239	6.1	0	0.1
CP023154	621145	621295	+	1030.3	0.826	3290	4.49	0	0.08
CP023154	634143	634293	+	699.2	0.701	2189	4.07	0	0.12
CP023154	635995	636145	+	864	0.803	3028	4.07	0	0.13
CP023154	640596	640746	+	1751.3	0.774	5477	8.42	0	0.1
CP023154	640947	641097	+	1094	0.75	3543	5.04	0	0.08
CP023154	644565	644715	+	1695.3	0.851	5318	8.65	0	0.07
CP023154	648270	648420	+	1024.3	0.632	2967	6.12	0	0.2
CP023154	661279	661429	+	907.5	0.714	2873	5.26	0	0.08
CP023154	663905	664055	+	1464.6	0.846	4794	4.95	0	0.06
CP023154	666536	666686	+	2754.4	0.827	8899	10.57	0	0.06
CP023154	667566	667716	+	1442.5	0.773	4981	5.64	0	0.11
CP023154	678304	678454	+	75991.5	0.915	97794	39.74	0	0.08
CP023154	684290	684440	+	1534.6	0.898	5155	5.24	0	0.07
CP023154	700512	700662	+	8030.6	0.512	25512	6.9	0	0.03
CP023154	702723	702873	+	8625.2	0.71	27220	7.14	0	0.02
CP023154	703171	703321	+	26627.5	0.916	75478	28.88	0	0.02
CP023154	711933	712083	+	754.8	0.855	2360	5.39	0	0.17
CP023154	716899	717049	+	950	0.611	2997	4.59	0	0.09
CP023154	721517	721667	+	1992.2	0.533	6268	9.9	0	0.06
CP023154	728539	728689	+	1449.8	0.818	4720	7.35	0	0.08
CP023154	731097	731247	+	1646.3	0.682	5281	10.03	0	0.1
CP023154	737446	737596	+	579.2	0.701	1894	4.15	0	0.14
CP023154	744118	744268	+	708.8	0.776	2283	4.04	0	0.18
CP023154	751820	751970	+	2030.6	0.489	6647	8.42	0	0.07
CP023154	752606	752756	+	1127.6	0.652	3606	4.29	0	0.08
CP023154	754330	754480	+	2054.9	0.825	6567	9.41	0	0.09
CP023154	760102	760252	+	958	0.637	3083	5.76	0	0.1
CP023154	765972	766122	+	647	0.737	2052	4.55	0	0.13
CP023154	781175	781325	+	704.3	0.639	2225	4.29	0	0.11
CP023154	782815	782965	+	1249.5	0.878	4039	8.58	0	0.08
CP023154	795085	795235	+	2216.2	0.69	6926	8.88	0	0.06
CP023154	796093	796243	+	3057.1	0.926	9801	13.07	0	0.05
CP023154	812348	812498	+	838	0.76	2651	5.34	0	0.13
CP023154	813688	813838	+	977.2	0.751	3259	7.09	0	0.1
CP023154	819045	819195	+	1598	0.713	5206	7.65	0	0.08
CP023154	824149	824299	+	3524.3	0.855	11044	6.97	0	0.04
CP023154	824946	825096	+	11063.5	0.662	39822	29.21	0	0.03
CP023154	839547	839697	+	2802.1	0.749	8865	9.24	0	0.05
CP023154	840591	840741	+	3349.3	0.949	11590	11.33	0	0.05
CP023154	847279	847429	+	4378	0.785	14153	5.34	0	0.04
CP023154	850025	850175	+	10406.8	0.847	32556	14.01	0	0.03
CP023154	860017	860167	+	2002.5	0.393	6292	7.02	0	0.05
CP023154	863220	863370	+	1892.4	0.881	6065	7.35	0	0.07
CP023154	875766	875916	+	2705.5	0.493	8615	12.33	0	0.04
CP023154	886703	886853	+	498.2	0.672	1582	5.83	0	0.13
CP023154	894362	894512	+	3643	0.752	12364	16.06	0	0.04
CP023154	894739	894889	+	1799.9	0.726	5841	7.21	0	0.06
CP023154	895069	895219	+	1780.1	0.801	5600	7.14	0	0.07
CP023154	903676	903826	+	505.9	0.53	1699	4.8	0	0.16
CP023154	920255	920405	+	1322.8	0.48	4240	7.59	0	0.08
CP023154	927902	928052	+	1481.8	0.659	5063	7.92	0	0.07
CP023154	936683	936833	+	667.5	0.741	2196	4.54	0	0.13
CP023154	940243	940393	+	627.5	0.461	1967	4.85	0	0.13
CP023154	942303	942453	+	631	0.706	1989	5.32	0	0.2
CP023154	948761	948911	+	728.3	0.487	2319	5.25	0	0.11
CP023154	952665	952815	+	752.9	0.552	2635	4.13	0	0.13
CP023154	956945	957095	+	2183.6	0.775	6869	13.64	0	0.08
CP023154	961984	962134	+	977.6	0.813	3096	5.64	0	0.12
CP023154	970017	970167	+	3300	0.803	11049	6.93	0	0.06
CP023154	973709	973859	+	4571	0.945	16472	8.66	0	0.05
CP023154	974026	974176	+	7650.2	0.895	23647	14.42	0	0.05
CP023154	978778	978928	+	3828.3	0.912	12342	6.81	0	0.04
CP023154	979674	979824	+	5087.8	0.663	15902	11.93	0	0.04
CP023154	982950	983100	+	2111.6	0.785	6935	4.57	0	0.08
CP023154	990190	990340	+	5154.6	0.688	17574	6.95	0	0.04
CP023154	993468	993618	+	12897.6	0.91	42494	21.9	0	0.03
CP023154	998612	998762	+	49287.2	0.769	139163	146.34	0	0.02
CP023154	1007427	1007577	+	1172.4	0.584	3888	5.35	0	0.09
CP023154	1013156	1013306	+	8577.2	0.861	27773	24.72	0	0.02
CP023154	1029328	1029478	+	4498.7	0.635	14283	11.76	0	0.04
CP023154	1032787	1032937	+	3634.1	0.877	11613	7.42	0	0.05
CP023154	1040019	1040169	+	7783.6	0.912	24632	11.78	0	0.03
CP023154	1041501	1041651	+	6383.4	0.906	22293	10.7	0	0.03
CP023154	1062380	1062530	+	735.6	0.715	2423	4.47	0	0.11
CP023154	1063445	1063595	+	706.2	0.716	2248	4.29	0	0.1
CP023154	1068936	1069086	+	1519.9	0.574	4781	8.34	0	0.12
CP023154	1079301	1079451	+	2967.9	0.523	9354	10.07	0	0.04
CP023154	1079749	1079899	+	5207.7	0.872	16553	20.25	0	0.03
CP023154	1089397	1089547	+	631.6	0.522	2067	4.46	0	0.13
CP023154	1094536	1094686	+	829.4	0.711	2712	5.65	0	0.18
CP023154	1100896	1101046	+	1066.2	0.8	3596	5.85	0	0.09
CP023154	1102328	1102478	+	1751.3	0.822	6017	10.63	0	0.07
CP023154	1110518	1110668	+	818.8	0.72	2625	4.21	0	0.1
CP023154	1114936	1115086	+	2279.6	0.861	8732	11.69	0	0.06
CP023154	1123100	1123250	+	2135.3	0.871	8129	6.23	0	0.07
CP023154	1123998	1124148	+	3860.9	0.763	12108	10.98	0	0.05
CP023154	1129234	1129384	+	1399.6	0.625	4427	4.41	0	0.08
CP023154	1129901	1130051	+	2226.5	0.653	7057	7.07	0	0.06
CP023154	1130529	1130679	+	2642.1	0.726	8277	8.5	0	0.05
CP023154	1134756	1134906	+	1195.8	0.705	3786	5.14	0	0.11
CP023154	1139750	1139900	+	872.6	0.518	2744	5.4	0	0.12
CP023154	1141068	1141218	+	1104.9	0.599	3570	7.03	0	0.1
CP023154	1143572	1143722	+	1241.5	0.452	4007	6.64	0	0.08
CP023154	1156615	1156765	+	2162.8	0.775	7122	7.27	0	0.06
CP023154	1157503	1157653	+	1318.3	0.634	4519	4.49	0	0.08
CP023154	1159091	1159241	+	2102	0.79	6707	7.9	0	0.08
CP023154	1164312	1164462	+	4992.4	0.949	16535	16.27	0	0.06
CP023154	1172798	1172948	+	5953.3	0.773	19963	7.58	0	0.03
CP023154	1173249	1173399	+	5932.5	0.877	19312	7.65	0	0.03
CP023154	1179804	1179954	+	1224.6	0.669	4047	5.49	0	0.09
CP023154	1180384	1180534	+	1671	0.834	5426	7.72	0	0.07
CP023154	1185885	1186035	+	1544.2	0.86	5710	8.99	0	0.1
CP023154	1190651	1190801	+	943.3	0.615	3020	5.76	0	0.1
CP023154	1194119	1194269	+	642.2	0.456	2041	4.62	0	0.15
CP023154	1200588	1200738	+	961.2	0.792	3073	5.61	0	0.1
CP023154	1201747	1201897	+	1216.9	0.7	4243	4.84	0	0.11
CP023154	1205720	1205870	+	1119.6	0.77	3519	4.66	0	0.08
CP023154	1206625	1206775	+	3709.6	0.789	12368	17.4	0	0.07
CP023154	1219989	1220139	+	578.9	0.607	1815	4.06	0	0.14
CP023154	1221623	1221773	+	531.8	0.786	1665	4.13	0	0.16
CP023154	1222662	1222812	+	552.6	0.808	1885	4.47	0	0.17
CP023154	1229347	1229497	+	1308.4	0.796	4169	6.68	0	0.08
CP023154	1237109	1237259	+	1274.2	0.522	4170	7.68	0	0.11
CP023154	1250893	1251043	+	1795.4	0.744	5721	11.47	0	0.06
CP023154	1255218	1255368	+	1448.9	0.809	4549	6.57	0	0.07
CP023154	1256260	1256410	+	1505.2	0.851	4756	7.66	0	0.08
CP023154	1268607	1268757	+	31969	0.823	97795	36.3	0	0.02
CP023154	1269133	1269283	+	18246.5	0.843	57610	15.32	0	0.02
CP023154	1274575	1274725	+	30344.4	0.827	95877	26.8	0	0.02
CP023154	1281845	1281995	+	951.6	0.832	3081	4.23	0	0.1
CP023154	1283683	1283833	+	2285.6	0.795	7229	12.52	0	0.05
CP023154	1290965	1291115	+	1415.3	0.697	4704	4.95	0	0.07
CP023154	1291475	1291625	+	2603.4	0.642	11018	4.26	0	0.09
CP023154	1296406	1296556	+	17949.5	0.834	55065	4.57	0	0.02
CP023154	1297750	1297900	+	83920.7	0.693	247812	28.99	0	0.01
CP023154	1308046	1308196	+	36758.5	0.949	119098	35.82	0	0.02
CP023154	1321548	1321698	+	957.1	0.883	3008	4.25	0	0.1
CP023154	1328184	1328334	+	5444.5	0.62	17262	15.72	0	0.03
CP023154	1333808	1333958	+	1732.1	0.648	5814	10.25	0	0.07
CP023154	1343885	1344035	+	1959.3	0.833	6398	9	0	0.09
CP023154	1345322	1345472	+	1981.7	0.479	7691	8.56	0	0.06
CP023154	1352289	1352439	+	2839.5	0.862	8908	9.84	0	0.05
CP023154	1354269	1354419	+	4586	0.94	14938	16.08	0	0.07
CP023154	1354993	1355143	+	1342.7	0.785	4513	4.04	0	0.12
CP023154	1357824	1357974	+	1349.7	0.845	4266	5.06	0	0.09
CP023154	1363322	1363472	+	2878.6	0.605	10042	11.68	0	0.05
CP023154	1364372	1364522	+	1718.3	0.839	5515	4.84	0	0.1
CP023154	1369010	1369160	+	2388	0.581	7598	5.48	0	0.07
CP023154	1374493	1374643	+	4837.5	0.883	16905	6.57	0	0.04
CP023154	1375465	1375615	+	3565.6	0.582	11551	4.67	0	0.06
CP023154	1376828	1376978	+	8565	0.885	27284	12.29	0	0.03
CP023154	1381923	1382073	+	6788.5	0.926	22083	19.52	0	0.03
CP023154	1389630	1389780	+	6554.2	0.613	20803	17.23	0	0.03
CP023154	1400400	1400550	+	1056.3	0.525	3436	5.84	0	0.09
CP023154	1406799	1406949	+	553.9	0.595	1782	4.58	0	0.19
CP023154	1414384	1414534	+	2668.7	0.583	8358	4.41	0	0.06
CP023154	1414790	1414940	+	2570.4	0.581	8064	4.25	0	0.06
CP023154	1415549	1415699	+	5089	0.676	15914	8.94	0	0.03
CP023154	1416036	1416186	+	7754.5	0.872	24637	14.79	0	0.03
CP023154	1422758	1422908	+	1759.9	0.34	5574	5.18	0	0.06
CP023154	1423822	1423972	+	2197.3	0.654	7076	6.41	0	0.06
CP023154	1426482	1426632	+	1648.2	0.785	5404	4.31	0	0.07
CP023154	1431515	1431665	+	1418.8	0.814	4558	7.26	0	0.06
CP023154	1452133	1452283	+	4298	0.905	13757	17.55	0	0.08
CP023154	1454868	1455018	+	3788.3	0.897	12070	14.91	0	0.04
CP023154	1463454	1463604	+	835.2	0.653	2697	4.71	0	0.12
CP023154	1469129	1469279	+	2526.6	0.528	8902	10.03	0	0.05
CP023154	1470733	1470883	+	1954.5	0.582	6678	7.56	0	0.08
CP023154	1476462	1476612	+	6073.6	0.87	20311	40.67	0	0.09
CP023154	1486397	1486547	+	5354	0.78	16737	29.83	0	0.03
CP023154	1491425	1491575	+	1536.2	0.872	5052	5.57	0	0.09
CP023154	1492890	1493040	+	2636.4	0.706	8329	10.66	0	0.05
CP023154	1493664	1493814	+	1126	0.704	3655	4.25	0	0.13
CP023154	1499971	1500121	+	2027.4	0.823	6482	9.01	0	0.07
CP023154	1503641	1503791	+	1239.6	0.702	4382	5.05	0	0.15
CP023154	1508114	1508264	+	2194.8	0.574	6901	11.31	0	0.05
CP023154	1509069	1509219	+	1800.6	0.765	5653	10.25	0	0.07
CP023154	1515251	1515401	+	727	0.684	2278	4.96	0	0.2
CP023154	1521761	1521911	+	1933.7	0.763	6209	6.28	0	0.07
CP023154	1522368	1522518	+	1990.9	0.562	6850	6.49	0	0.06
CP023154	1534006	1534156	+	897.6	0.582	3025	5.11	0	0.1
CP023154	1538243	1538393	+	988.8	0.889	3306	5.28	0	0.1
CP023154	1544909	1545059	+	4010	0.692	12739	4.02	0	0.04
CP023154	1545648	1545798	+	18344.1	0.925	58034	23.56	0	0.02
CP023154	1547076	1547226	+	7334	0.904	23160	7.47	0	0.03
CP023154	1552460	1552610	+	5120.7	0.579	16056	9.06	0	0.03
CP023154	1554326	1554476	+	3237.9	0.491	10406	5.19	0	0.05
CP023154	1559081	1559231	+	1582	0.653	4971	4.17	0	0.09
CP023154	1565763	1565913	+	2691.4	0.631	8427	4.86	0	0.05
CP023154	1567024	1567174	+	11688.1	0.945	40449	27.57	0	0.03
CP023154	1574179	1574329	+	1662	0.827	5268	8.65	0	0.07
CP023154	1578261	1578411	+	2837	0.488	9265	14.63	0	0.05
CP023154	1584519	1584669	+	59188.5	0.767	177740	76.2	0	0.01
CP023154	1586230	1586380	+	7064.9	0.535	22476	4.34	0	0.03
CP023154	1598135	1598285	+	2545.8	0.716	8054	9.21	0	0.05
CP023154	1600355	1600505	+	1603.1	0.752	5539	6.44	0	0.08
CP023154	1600824	1600974	+	1327.6	0.669	4487	5.21	0	0.09
CP023154	1603136	1603286	+	1093.1	0.618	3939	4.69	0	0.08
CP023154	1608275	1608425	+	1448.2	0.646	4693	6.12	0	0.08
CP023154	1608815	1608965	+	2792.2	0.856	8997	12.3	0	0.05
CP023154	1616576	1616726	+	18963.6	0.481	61837	27.23	0	0.02
CP023154	1625037	1625187	+	1227.5	0.537	3839	7.85	0	0.08
CP023154	1628253	1628403	+	1112.3	0.477	3534	6.93	0	0.09
CP023154	1631792	1631942	+	921.2	0.853	2896	6.83	0	0.11
CP023154	1636530	1636680	+	630	0.866	1980	4.48	0	0.14
CP023154	1636953	1637103	+	514.5	0.626	1637	4.18	0	0.14
CP023154	1641371	1641521	+	718.4	0.613	2356	4.99	0	0.13
CP023154	1655727	1655877	+	54340.1	0.957	160461	106.57	0	0.01
CP023154	1662526	1662676	+	1888.9	0.775	6158	9.76	0	0.06
CP023154	1666840	1666990	+	967.6	0.927	3103	5.13	0	0.3
CP023154	1672348	1672498	+	909.4	0.652	3001	4.51	0	0.09
CP023154	1673282	1673432	+	958.7	0.674	3044	4.88	0	0.09
CP023154	1681967	1682117	+	7624.9	0.495	24476	13.08	0	0.03
CP023154	1682517	1682667	+	7618.8	0.557	23986	13.24	0	0.03
CP023154	1695900	1696050	+	3651	0.701	11528	13.73	0	0.04
CP023154	1697914	1698064	+	2853.6	0.833	9068	10.29	0	0.04
CP023154	1706343	1706493	+	880.9	0.67	2880	6.39	0	0.1
CP023154	1712104	1712254	+	9013.3	0.741	28793	21.3	0	0.03
CP023154	1714310	1714460	+	7468.8	0.765	24568	15.41	0	0.03
CP023154	1725349	1725499	+	1381.7	0.535	5190	4.58	0	0.09
CP023154	1725996	1726146	+	3662.5	0.804	11686	13.31	0	0.04
CP023154	1726411	1726561	+	1679	0.372	5317	5.21	0	0.07
CP023154	1731579	1731729	+	1304.9	0.894	4261	6.05	0	0.11
CP023154	1732874	1733024	+	1372.1	0.827	4334	6.24	0	0.07
CP023154	1735558	1735708	+	2010.8	0.916	6341	9.09	0	0.08
CP023154	1746765	1746915	+	2589	0.764	8874	16	0	0.06
CP023154	1748571	1748721	+	1153.5	0.732	3717	6.51	0	0.08
CP023154	1752544	1752694	+	1098.8	0.425	3437	9.36	0	0.08
CP023154	1759823	1759973	+	752.3	0.605	2367	7.01	0	0.15
CP023154	1765412	1765562	+	933.7	0.575	2928	6.97	0	0.11
CP023154	1772474	1772624	+	13652.5	0.845	42652	28.75	0	0.02
CP023154	1774154	1774304	+	7016.3	0.723	21846	11.38	0	0.03
CP023154	1779934	1780084	+	3000.2	0.518	9457	5.99	0	0.05
CP023154	1781511	1781661	+	8742	0.754	28263	22.41	0	0.02
CP023154	1789346	1789496	+	6942.1	0.73	21911	6.08	0	0.03
CP023154	1792254	1792404	+	16700.9	0.897	52629	15.61	0	0.03
CP023154	1796980	1797130	+	2931.4	0.526	9161	4.73	0	0.05
CP023154	1809631	1809781	+	3601.4	0.844	11284	7.8	0	0.04
CP023154	1810495	1810645	+	4475	0.944	14089	9.91	0	0.07
CP023154	1816155	1816305	+	2796.3	0.667	8881	12.05	0	0.05
CP023154	1828090	1828240	+	9778.4	0.97	34584	30.62	0	0.04
CP023154	1842834	1842984	+	670	0.684	2115	4.02	0	0.12
CP023154	1844000	1844150	+	976.3	0.718	3293	5.58	0	0.15
CP023154	1844868	1845018	+	701.7	0.731	2374	4.08	0	0.22
CP023154	1845693	1845843	+	822.4	0.693	2672	4.72	0	0.15
CP023154	1847980	1848130	+	794.5	0.73	2488	4.05	0	0.23
CP023154	1852714	1852864	+	921.6	0.754	3028	4.19	0	0.1
CP023154	1854303	1854453	+	2034.5	0.956	6504	11.14	0	0.07
CP023154	1857045	1857195	+	1107.1	0.641	3693	5.28	0	0.09
CP023154	1879099	1879249	+	1684.1	0.819	5389	6.28	0	0.11
CP023154	1880071	1880221	+	1778.8	0.655	6061	6.82	0	0.07
CP023154	1880567	1880717	+	3146.1	0.622	9891	11.37	0	0.04
CP023154	1885306	1885456	+	1884.7	0.634	6144	4.28	0	0.06
CP023154	1886022	1886172	+	1868.7	0.64	5917	5.06	0	0.06
CP023154	1888979	1889129	+	10227.7	0.926	27701	51.8	0	0.09

## Sheet: homer SmAP-Strep 3
Table S1. Homer output from replicate 3 of SmAP co-purified RNAs mapped to the P. furiosus genome.
chr	start	end	strand	score	focus ratio/other	Total Tags	Background	Fold Change	p-value
CP023154	229	379	-	1081.4	0.895	3346	10.08	0	0.18
CP023154	520	670	-	1216.8	0.95	3892	11.1	0	0.1
CP023154	1329	1479	-	1018.4	0.947	3268	8.22	0	0.15
CP023154	8181	8331	-	1342.1	0.741	4763	5.8	0	0.1
CP023154	10203	10353	-	1497.4	0.665	4598	5.22	0	0.14
CP023154	10798	10948	-	2381	0.654	7354	8.99	0	0.12
CP023154	14503	14653	-	2883.8	0.89	9170	14.34	0	0.09
CP023154	25636	25786	-	1008.6	0.857	3161	5.61	0	0.12
CP023154	26277	26427	-	793.9	0.59	2452	4.49	0	0.15
CP023154	33016	33166	-	9008.8	0.78	28758	18.03	0	0.03
CP023154	35026	35176	-	3217	0.833	9966	5.04	0	0.04
CP023154	36094	36244	-	2773.5	0.857	9031	4.27	0	0.06
CP023154	41102	41252	-	1732	0.824	5405	6.32	0	0.09
CP023154	48292	48442	-	907.1	0.547	2844	4.37	0	0.15
CP023154	49318	49468	-	2623.8	0.587	8189	14.32	0	0.06
CP023154	60719	60869	-	2374.5	0.676	7383	9.77	0	0.05
CP023154	61057	61207	-	1809.7	0.844	5965	7.34	0	0.16
CP023154	66875	67025	-	1374.4	0.574	4255	8.82	0	0.07
CP023154	71991	72141	-	939.1	0.808	3042	5	0	0.14
CP023154	72674	72824	-	1213.8	0.821	3746	6.64	0	0.13
CP023154	79862	80012	-	1034.7	0.759	3304	4.14	0	0.09
CP023154	86268	86418	-	21363.7	0.57	67609	31.03	0	0.02
CP023154	86757	86907	-	9120.7	0.434	25641	10.29	0	0.04
CP023154	93953	94103	-	1039.3	0.545	3280	4.71	0	0.17
CP023154	102997	103147	-	3502.5	0.843	11078	10.35	0	0.07
CP023154	107237	107387	-	4334.2	0.787	14790	9.14	0	0.05
CP023154	110664	110814	-	2029.6	0.634	6220	5.28	0	0.09
CP023154	118322	118472	-	2178.7	0.603	6723	12.28	0	0.07
CP023154	118645	118795	-	788.3	0.792	2831	4.27	0	0.16
CP023154	119127	119277	-	715.6	0.434	2437	4.14	0	0.23
CP023154	138919	139069	-	3314.2	0.746	10261	13.6	0	0.06
CP023154	140054	140204	-	1058.8	0.71	3369	4.22	0	0.11
CP023154	146245	146395	-	5508.9	0.698	17218	12.78	0	0.04
CP023154	148713	148863	-	2511.5	0.785	7791	4.12	0	0.07
CP023154	153173	153323	-	3669.6	0.813	11537	7.71	0	0.05
CP023154	153727	153877	-	6034.2	0.507	18122	14.2	0	0.05
CP023154	159360	159510	-	856.2	0.573	2632	5.37	0	0.15
CP023154	165230	165380	-	2238.7	0.829	7253	12.76	0	0.06
CP023154	165588	165738	-	1055.2	0.862	3240	5.19	0	0.11
CP023154	180121	180271	-	585.4	0.789	1804	4.55	0	0.17
CP023154	189288	189438	-	756.4	0.569	2333	5.08	0	0.13
CP023154	193804	193954	-	795.8	0.692	2630	4.34	0	0.16
CP023154	196217	196367	-	1295.4	0.586	4026	8.12	0	0.1
CP023154	197793	197943	-	2126.8	0.892	6547	15.63	0	0.09
CP023154	203814	203964	-	750.8	0.764	2352	6.1	0	0.19
CP023154	204263	204413	-	792.9	0.796	2476	6.5	0	0.18
CP023154	204860	205010	-	675.4	0.831	2092	4.25	0	0.22
CP023154	209885	210035	-	3430.4	0.791	11251	6.24	0	0.05
CP023154	210680	210830	-	5755.6	0.704	18092	11.04	0	0.04
CP023154	211403	211553	-	3887.5	0.833	15125	6.88	0	0.07
CP023154	216610	216760	-	1701.3	0.695	5299	5.71	0	0.07
CP023154	217246	217396	-	1691.2	0.534	5331	6.19	0	0.06
CP023154	222411	222561	-	1558.4	0.915	4799	11.05	0	0.1
CP023154	230216	230366	-	1973.1	0.679	6690	5.48	0	0.08
CP023154	231624	231774	-	2320	0.898	7492	6.12	0	0.1
CP023154	233539	233689	-	1792.7	0.812	5782	4.95	0	0.1
CP023154	239699	239849	-	978.6	0.678	3202	5.66	0	0.12
CP023154	248033	248183	-	1657.9	0.735	5129	7.78	0	0.11
CP023154	250892	251042	-	852.9	0.624	2676	4.62	0	0.16
CP023154	256394	256544	-	3411.5	0.96	10670	23.45	0	0.08
CP023154	259546	259696	-	833.4	0.47	2614	4.82	0	0.12
CP023154	267147	267297	-	1187.4	0.761	3713	8.74	0	0.09
CP023154	272501	272651	-	958.7	0.771	2995	8.24	0	0.11
CP023154	280168	280318	-	880.4	0.89	2787	6.95	0	0.16
CP023154	287232	287382	-	1304.2	0.711	4036	7.33	0	0.1
CP023154	290758	290908	-	1117.2	0.887	3798	5.22	0	0.16
CP023154	296347	296497	-	659.8	0.456	2051	4.05	0	0.22
CP023154	299609	299759	-	935.2	0.652	2956	6.56	0	0.12
CP023154	304306	304456	-	1111	0.833	3520	7.55	0	0.11
CP023154	308394	308544	-	1020.7	0.836	3270	4.35	0	0.14
CP023154	310757	310907	-	3323	0.864	10302	17.81	0	0.08
CP023154	311123	311273	-	1220	0.704	3893	5.57	0	0.09
CP023154	317048	317198	-	2321.6	0.559	7118	9.51	0	0.09
CP023154	319071	319221	-	6006.8	0.903	18871	30.03	0	0.04
CP023154	325111	325261	-	608.2	0.691	1903	4.21	0	0.13
CP023154	332327	332477	-	648.4	0.685	1997	4.34	0	0.16
CP023154	335501	335651	-	1493.8	0.902	5545	6.24	0	0.11
CP023154	339614	339764	-	2214.3	0.568	6812	4.82	0	0.08
CP023154	342280	342430	-	4382.2	0.753	13957	9.64	0	0.04
CP023154	345126	345276	-	3202.9	0.914	8441	5.48	0	0.17
CP023154	349923	350073	-	7568.8	0.745	24459	12.25	0	0.03
CP023154	351151	351301	-	8447.2	0.92	28211	14.31	0	0.06
CP023154	351694	351844	-	5909.6	0.836	17879	9.36	0	0.05
CP023154	358171	358321	-	720.8	0.853	2252	4.63	0	0.23
CP023154	366619	366769	-	783.1	0.872	2418	5.98	0	0.11
CP023154	367324	367474	-	657.2	0.786	2248	4.62	0	0.19
CP023154	371736	371886	-	849.4	0.642	3013	6.06	0	0.19
CP023154	373151	373301	-	1015.4	0.847	3117	7.31	0	0.09
CP023154	376173	376323	-	998.1	0.799	3063	5.75	0	0.14
CP023154	379610	379760	-	750.2	0.779	2427	5.18	0	0.17
CP023154	385420	385570	-	726.7	0.868	2272	5.64	0	0.13
CP023154	386157	386307	-	729.9	0.633	2263	5.53	0	0.19
CP023154	391612	391762	-	2355.5	0.713	7219	10.01	0	0.06
CP023154	391999	392149	-	2055.4	0.865	6432	8.13	0	0.08
CP023154	403842	403992	-	1850.8	0.887	5892	6.76	0	0.08
CP023154	405745	405895	-	2803.9	0.67	9073	8.34	0	0.07
CP023154	406959	407109	-	1852.7	0.831	5696	5.06	0	0.07
CP023154	409564	409714	-	1869.7	0.723	5955	5.93	0	0.1
CP023154	410989	411139	-	1621.1	0.724	4953	6.2	0	0.14
CP023154	418113	418263	-	640.2	0.629	2066	4.91	0	0.16
CP023154	419059	419209	-	596.8	0.605	1871	4.54	0	0.18
CP023154	424542	424692	-	467.6	0.403	1436	4.7	0	0.28
CP023154	431211	431361	-	655.5	0.624	2201	4.14	0	0.15
CP023154	437774	437924	-	866.6	0.578	2914	4.46	0	0.15
CP023154	441910	442060	-	860.8	0.504	2815	4.82	0	0.11
CP023154	447911	448061	-	8304.6	0.851	26954	9.34	0	0.04
CP023154	448903	449053	-	18754.3	0.617	59156	22.18	0	0.02
CP023154	453313	453463	-	3663.7	0.784	11456	4	0	0.05
CP023154	455360	455510	-	2362.4	0.89	7601	5.51	0	0.07
CP023154	460365	460515	-	4887	0.884	15816	13.86	0	0.07
CP023154	466471	466621	-	1830.5	0.691	5901	4.54	0	0.06
CP023154	469451	469601	-	4059.2	0.672	11564	12.53	0	0.07
CP023154	479793	479943	-	15575.2	0.813	47699	22.37	0	0.03
CP023154	486961	487111	-	886.9	0.679	2933	4.07	0	0.13
CP023154	504253	504403	-	2408.4	0.832	7438	5.01	0	0.06
CP023154	504905	505055	-	8660.9	0.915	27139	21.6	0	0.04
CP023154	510559	510709	-	929.6	0.849	2866	4.47	0	0.11
CP023154	512327	512477	-	2139.2	0.758	7191	9.86	0	0.08
CP023154	516120	516270	-	1953.9	0.894	6150	10.88	0	0.08
CP023154	521640	521790	-	820.6	0.855	2718	4.3	0	0.13
CP023154	522436	522586	-	837.9	0.583	2645	4.32	0	0.15
CP023154	526537	526687	-	1027.5	0.837	3165	5.8	0	0.13
CP023154	531109	531259	-	686.2	0.84	2216	5.71	0	0.27
CP023154	536622	536772	-	540	0.948	1743	4.4	0	0.31
CP023154	538318	538468	-	962.6	0.904	2996	9.12	0	0.24
CP023154	539057	539207	-	713.9	0.824	2233	6.55	0	0.16
CP023154	547389	547539	-	5322.3	0.826	16500	27.2	0	0.04
CP023154	555922	556072	-	3284.8	0.89	12075	10.97	0	0.06
CP023154	560351	560501	-	1612.6	0.691	5435	6.01	0	0.09
CP023154	563333	563483	-	1626.6	0.826	5059	9.09	0	0.12
CP023154	566326	566476	-	420.9	0.496	1309	4.17	0	0.28
CP023154	571471	571621	-	687.2	0.833	2355	6.43	0	0.13
CP023154	574568	574718	-	628.5	0.728	1929	5.13	0	0.15
CP023154	580492	580642	-	549.5	0.49	1692	4.72	0	0.19
CP023154	589049	589199	-	3521.4	0.908	12608	20.17	0	0.07
CP023154	590431	590581	-	1591.7	0.833	5083	7.95	0	0.08
CP023154	597377	597527	-	2630.3	0.748	8566	13.61	0	0.07
CP023154	598248	598398	-	877.7	0.814	2700	4.1	0	0.2
CP023154	605738	605888	-	2096.8	0.831	5592	4.21	0	0.42
CP023154	607020	607170	-	16411.8	0.964	15390	61.64	0	0.28
CP023154	613659	613809	-	1029.8	0.707	3265	7.33	0	0.14
CP023154	621725	621875	-	980.9	0.846	3183	5.08	0	0.12
CP023154	625551	625701	-	1434.1	0.665	4559	9.18	0	0.08
CP023154	638192	638342	-	2182.9	0.659	6761	12.29	0	0.08
CP023154	645547	645697	-	1472.3	0.806	4980	7.81	0	0.11
CP023154	650571	650721	-	2337	0.835	7646	13.52	0	0.06
CP023154	656851	657001	-	1783.9	0.582	5507	8.93	0	0.08
CP023154	657357	657507	-	1256.6	0.602	3894	5.92	0	0.09
CP023154	660398	660548	-	1069.3	0.739	3393	4.78	0	0.12
CP023154	660772	660922	-	1223.9	0.923	4048	5.5	0	0.15
CP023154	672934	673084	-	625.8	0.782	2069	5.48	0	0.18
CP023154	675273	675423	-	659.4	0.633	2147	4.48	0	0.15
CP023154	693767	693917	-	1243.8	0.656	3850	4.7	0	0.08
CP023154	694266	694416	-	2216.9	0.623	6816	8.81	0	0.06
CP023154	694888	695038	-	1216.4	0.701	3790	4.5	0	0.07
CP023154	697246	697396	-	1310.1	0.51	4070	5.06	0	0.08
CP023154	714065	714215	-	3241.4	0.909	9989	7.61	0	0.09
CP023154	714652	714802	-	9136.4	0.918	30222	26.42	0	0.04
CP023154	721904	722054	-	1015.1	0.708	3121	6.63	0	0.16
CP023154	729801	729951	-	1910.5	0.642	6480	5.15	0	0.12
CP023154	730158	730308	-	1654	0.715	5106	4.46	0	0.11
CP023154	733767	733917	-	1928.8	0.873	6007	6.16	0	0.09
CP023154	739632	739782	-	3977.6	0.878	12370	27.88	0	0.04
CP023154	748790	748940	-	406.2	0.82	1245	4.26	0	0.26
CP023154	754480	754630	-	1126.4	0.837	3512	5.44	0	0.1
CP023154	758487	758637	-	2536	0.848	8217	5.73	0	0.06
CP023154	762047	762197	-	3375.6	0.686	10603	5.11	0	0.07
CP023154	764135	764285	-	3033.3	0.805	11025	5.79	0	0.11
CP023154	771724	771874	-	540.4	0.753	1824	4.24	0	0.2
CP023154	781521	781671	-	5775.5	0.816	18274	30.09	0	0.06
CP023154	790775	790925	-	4341.4	0.841	13346	10.33	0	0.05
CP023154	793591	793741	-	2351.6	0.566	8012	5.36	0	0.06
CP023154	793872	794022	-	3457.5	0.938	11261	8.17	0	0.04
CP023154	794322	794472	-	4977	0.891	16543	12.5	0	0.05
CP023154	799522	799672	-	734.5	0.686	2428	5.52	0	0.15
CP023154	811168	811318	-	1015.1	0.534	3129	6.61	0	0.11
CP023154	816212	816362	-	970.4	0.838	3189	7.65	0	0.14
CP023154	822015	822165	-	1053.6	0.864	3237	4.91	0	0.21
CP023154	827011	827161	-	2477.9	0.867	8000	8.18	0	0.09
CP023154	837296	837446	-	8789.2	0.897	26254	15.07	0	0.04
CP023154	837642	837792	-	14305.6	0.923	44003	28.38	0	0.03
CP023154	843855	844005	-	960.3	0.557	2960	6.64	0	0.11
CP023154	852576	852726	-	38052.3	0.677	97929	97.19	0	0.02
CP023154	859305	859455	-	1134.9	0.825	3497	8.36	0	0.13
CP023154	872339	872489	-	691.8	0.713	2181	4.08	0	0.14
CP023154	873664	873814	-	752.1	0.723	2372	4.5	0	0.12
CP023154	876865	877015	-	1328.7	0.807	4301	8.2	0	0.11
CP023154	881901	882051	-	769.4	0.751	2419	5.65	0	0.12
CP023154	890730	890880	-	758.3	0.729	2338	6.13	0	0.17
CP023154	900719	900869	-	2604.5	0.787	8011	8.46	0	0.08
CP023154	903650	903800	-	3043.7	0.641	9383	4.61	0	0.07
CP023154	907612	907762	-	11954.9	0.854	36777	18.75	0	0.04
CP023154	909866	910016	-	3174.9	0.898	10294	4.46	0	0.05
CP023154	912991	913141	-	3409.5	0.666	10608	8.75	0	0.05
CP023154	919646	919796	-	1241.2	0.539	3889	5.55	0	0.15
CP023154	920122	920272	-	1352.2	0.515	4342	6.14	0	0.13
CP023154	923173	923323	-	1039.9	0.849	3236	4.03	0	0.09
CP023154	928400	928550	-	2220.5	0.803	6812	5.22	0	0.1
CP023154	930262	930412	-	3564.8	0.852	11619	6.55	0	0.06
CP023154	932801	932951	-	2868.8	0.687	8996	4.36	0	0.05
CP023154	933921	934071	-	3478	0.516	10659	6.16	0	0.06
CP023154	935997	936147	-	2766.4	0.576	9140	5.88	0	0.08
CP023154	942685	942835	-	672.5	0.717	2064	4.55	0	0.14
CP023154	948109	948259	-	587	0.665	1821	4.1	0	0.15
CP023154	957501	957651	-	1682.7	0.738	5180	4.67	0	0.17
CP023154	959542	959692	-	8317.7	0.902	24178	26.43	0	0.07
CP023154	962901	963051	-	1780.3	0.835	5945	5.17	0	0.08
CP023154	963512	963662	-	1399.2	0.752	4317	4.14	0	0.09
CP023154	969200	969350	-	1343	0.818	4139	4.79	0	0.11
CP023154	969754	969904	-	1860.9	0.686	5765	6.77	0	0.1
CP023154	971463	971613	-	1818.5	0.69	5797	5.22	0	0.11
CP023154	974009	974159	-	1990.7	0.826	6711	5.72	0	0.07
CP023154	975866	976016	-	2078.2	0.777	6805	6.52	0	0.08
CP023154	979586	979736	-	1462.8	0.524	4500	5.34	0	0.11
CP023154	983434	983584	-	1070.9	0.657	3286	5.76	0	0.1
CP023154	984010	984160	-	1144	0.497	3733	6.08	0	0.15
CP023154	992750	992900	-	810.9	0.339	2584	5.73	0	0.11
CP023154	995044	995194	-	763.5	0.882	2355	5.12	0	0.13
CP023154	1001375	1001525	-	736.8	0.776	2266	5.5	0	0.13
CP023154	1004920	1005070	-	647.7	0.863	2026	5.14	0	0.22
CP023154	1017491	1017641	-	1751.2	0.711	5377	9.08	0	0.07
CP023154	1019620	1019770	-	1637	0.515	6267	6.65	0	0.1
CP023154	1023044	1023194	-	1833.8	0.806	5653	8.48	0	0.08
CP023154	1033871	1034021	-	2518.7	0.512	7725	11.59	0	0.06
CP023154	1034578	1034728	-	1889.9	0.687	6172	8.55	0	0.08
CP023154	1041785	1041935	-	3416.7	0.703	11344	8.96	0	0.07
CP023154	1043142	1043292	-	2360.8	0.823	7359	4.11	0	0.07
CP023154	1048248	1048398	-	59151.7	0.923	76071	69.83	0	0.08
CP023154	1054999	1055149	-	2764.4	0.723	8667	4.15	0	0.06
CP023154	1064691	1064841	-	7312.7	0.968	22617	28.98	0	0.04
CP023154	1071324	1071474	-	4749.6	0.596	14671	10.06	0	0.05
CP023154	1074477	1074627	-	2159.1	0.898	6920	4.27	0	0.19
CP023154	1074884	1075034	-	7034.7	0.796	17315	16.43	0	0.22
CP023154	1092900	1093050	-	824.9	0.482	2751	4.68	0	0.13
CP023154	1102523	1102673	-	1080	0.846	3381	6.41	0	0.11
CP023154	1108972	1109122	-	3259.4	0.642	11044	12.28	0	0.06
CP023154	1119730	1119880	-	6340.3	0.725	18696	26.2	0	0.04
CP023154	1121862	1122012	-	2063.2	0.551	6679	5.69	0	0.08
CP023154	1124757	1124907	-	2790.2	0.889	8893	10.69	0	0.09
CP023154	1131097	1131247	-	1160.3	0.878	3575	6.79	0	0.11
CP023154	1138948	1139098	-	23719	0.871	59817	88.43	0	0.03
CP023154	1157144	1157294	-	930	0.726	2864	5.66	0	0.13
CP023154	1159758	1159908	-	736.8	0.732	2263	4.35	0	0.14
CP023154	1161081	1161231	-	824.9	0.791	2565	5.12	0	0.16
CP023154	1167448	1167598	-	540.7	0.846	1802	4.07	0	0.18
CP023154	1170349	1170499	-	879	0.333	2878	6.83	0	0.16
CP023154	1176029	1176179	-	1896.4	0.533	5879	12.53	0	0.07
CP023154	1178753	1178903	-	1094.4	0.678	3479	6.1	0	0.12
CP023154	1185976	1186126	-	3392.5	0.898	11164	12.59	0	0.05
CP023154	1186829	1186979	-	1957.8	0.862	6204	6.49	0	0.11
CP023154	1193635	1193785	-	48386.5	0.523	107624	30.53	0	0.02
CP023154	1194784	1194934	-	26553.2	0.556	80788	13.83	0	0.02
CP023154	1200052	1200202	-	969.4	0.576	3050	4.32	0	0.12
CP023154	1206633	1206783	-	5116	0.842	14438	20.09	0	0.08
CP023154	1212806	1212956	-	2776.8	0.854	8891	6.2	0	0.06
CP023154	1214431	1214581	-	2360.4	0.823	6831	5.23	0	0.12
CP023154	1215539	1215689	-	1988.5	0.754	6094	4.49	0	0.07
CP023154	1223762	1223912	-	599.4	0.689	1837	4.79	0	0.21
CP023154	1230216	1230366	-	2486.1	0.92	7786	15.7	0	0.09
CP023154	1230804	1230954	-	782.8	0.715	2555	4.2	0	0.12
CP023154	1237077	1237227	-	814.4	0.754	2593	9.23	0	0.17
CP023154	1242540	1242690	-	7167.5	0.948	25583	9.98	0	0.05
CP023154	1243920	1244070	-	7301.3	0.893	22608	9.92	0	0.07
CP023154	1245744	1245894	-	7555.1	0.797	23570	6.91	0	0.04
CP023154	1249536	1249686	-	12891.1	0.929	38323	20.85	0	0.03
CP023154	1252117	1252267	-	2266.5	0.737	6998	4.35	0	0.07
CP023154	1266795	1266945	-	2574.2	0.804	8068	11.21	0	0.08
CP023154	1272385	1272535	-	1911.1	0.703	5906	4.76	0	0.07
CP023154	1275288	1275438	-	10236	0.776	33880	31.78	0	0.03
CP023154	1283838	1283988	-	1791.7	0.777	5795	9.57	0	0.11
CP023154	1285534	1285684	-	966.5	0.796	3031	5.12	0	0.11
CP023154	1289823	1289973	-	1283.3	0.806	3946	4.01	0	0.1
CP023154	1291421	1291571	-	6252.5	0.818	20713	27.95	0	0.04
CP023154	1304971	1305121	-	1325.8	0.815	4187	9.15	0	0.13
CP023154	1310949	1311099	-	1003.7	0.614	3100	6.38	0	0.1
CP023154	1316435	1316585	-	968.8	0.853	3070	4.19	0	0.18
CP023154	1317976	1318126	-	1033.4	0.74	3193	4.49	0	0.11
CP023154	1319480	1319630	-	1417.8	0.874	4629	6.55	0	0.09
CP023154	1330247	1330397	-	4674.9	0.661	15194	12.98	0	0.05
CP023154	1332060	1332210	-	4735.6	0.96	16001	13.68	0	0.06
CP023154	1338713	1338863	-	1312	0.775	4118	6.01	0	0.12
CP023154	1345106	1345256	-	1402.8	0.56	5196	5.24	0	0.11
CP023154	1346439	1346589	-	1728.4	0.746	5302	6.93	0	0.09
CP023154	1350152	1350302	-	1217.7	0.836	3866	6.72	0	0.11
CP023154	1360924	1361074	-	2031.5	0.947	6479	6.36	0	0.07
CP023154	1361569	1361719	-	3088.1	0.712	10021	10.2	0	0.05
CP023154	1375369	1375519	-	6540	0.682	20617	22.59	0	0.04
CP023154	1383132	1383282	-	710.7	0.732	2550	4.18	0	0.12
CP023154	1387568	1387718	-	731.2	0.889	2257	4.31	0	0.15
CP023154	1402963	1403113	-	1162.9	0.591	4321	5.43	0	0.16
CP023154	1408602	1408752	-	21211	0.955	68127	43.59	0	0.02
CP023154	1409350	1409500	-	4997.9	0.591	15389	6.75	0	0.04
CP023154	1416405	1416555	-	5940.9	0.553	18463	14.46	0	0.05
CP023154	1417161	1417311	-	2169.9	0.635	6717	4.77	0	0.08
CP023154	1417591	1417741	-	4506.5	0.944	14683	10.54	0	0.06
CP023154	1424245	1424395	-	7704.2	0.606	25617	13.68	0	0.04
CP023154	1427432	1427582	-	4073.8	0.763	12603	7.05	0	0.05
CP023154	1427842	1427992	-	3776.6	0.522	11617	6.62	0	0.05
CP023154	1435577	1435727	-	1602.1	0.672	5181	4.29	0	0.08
CP023154	1436599	1436749	-	1761.4	0.848	5945	4.71	0	0.09
CP023154	1437104	1437254	-	3078.6	0.867	9944	8.67	0	0.08
CP023154	1439683	1439833	-	1949.6	0.897	6141	5.09	0	0.06
CP023154	1447615	1447765	-	2673.4	0.805	8175	6.11	0	0.1
CP023154	1450688	1450838	-	7227.8	0.958	26271	19.39	0	0.04
CP023154	1456283	1456433	-	4606.4	0.937	14108	15.76	0	0.07
CP023154	1457161	1457311	-	2433.5	0.841	7458	7.17	0	0.06
CP023154	1464396	1464546	-	1130.3	0.783	3490	4.02	0	0.1
CP023154	1466221	1466371	-	2009.3	0.833	6714	7.79	0	0.08
CP023154	1470538	1470688	-	1333.3	0.514	4168	5	0	0.09
CP023154	1477077	1477227	-	13870	0.534	42189	26.47	0	0.02
CP023154	1482851	1483001	-	1638	0.592	5422	8.33	0	0.08
CP023154	1488875	1489025	-	1329.3	0.639	4312	4.7	0	0.08
CP023154	1490263	1490413	-	3008.1	0.931	9422	10.26	0	0.08
CP023154	1498232	1498382	-	1884	0.467	6185	5.65	0	0.1
CP023154	1499054	1499204	-	2324.9	0.828	7265	7.23	0	0.08
CP023154	1500648	1500798	-	2059.9	0.871	6380	6.66	0	0.07
CP023154	1508026	1508176	-	1840	0.431	5777	8.2	0	0.08
CP023154	1514477	1514627	-	9128.5	0.962	29413	9.19	0	0.05
CP023154	1516652	1516802	-	12018.6	0.865	37576	12.15	0	0.04
CP023154	1518873	1519023	-	6858.1	0.846	21824	6.43	0	0.05
CP023154	1526464	1526614	-	686.9	0.907	2116	4.41	0	0.16
CP023154	1530487	1530637	-	673.2	0.701	2335	4.15	0	0.17
CP023154	1541047	1541197	-	5110.5	0.977	13201	23.26	0	0.2
CP023154	1554750	1554900	-	941	0.89	2888	6.92	0	0.11
CP023154	1560390	1560540	-	612.5	0.747	2058	5.02	0	0.16
CP023154	1572941	1573091	-	4458.2	0.48	14931	17.38	0	0.05
CP023154	1578144	1578294	-	3555.3	0.722	10754	10.49	0	0.08
CP023154	1578506	1578656	-	2136.6	0.564	6548	5.95	0	0.06
CP023154	1579633	1579783	-	2022.1	0.799	6501	5.58	0	0.07
CP023154	1591466	1591616	-	6972	0.973	14622	33.86	0	0.12
CP023154	1594187	1594337	-	1319.6	0.728	4086	4.8	0	0.1
CP023154	1600916	1601066	-	976.6	0.812	3252	4.67	0	0.12
CP023154	1601396	1601546	-	884.3	0.5	2817	4.05	0	0.14
CP023154	1601791	1601941	-	1159.3	0.812	4064	5.52	0	0.14
CP023154	1618488	1618638	-	5543.2	0.918	17137	13.66	0	0.06
CP023154	1619449	1619599	-	4521.8	0.667	14449	10.83	0	0.05
CP023154	1627681	1627831	-	15712.6	0.849	46896	27.76	0	0.02
CP023154	1636638	1636788	-	3522.7	0.67	10843	4.63	0	0.05
CP023154	1637112	1637262	-	3632.4	0.528	11173	4.85	0	0.05
CP023154	1637935	1638085	-	9526.6	0.951	29810	14.36	0	0.04
CP023154	1639392	1639542	-	4812.6	0.509	14369	6.47	0	0.05
CP023154	1646280	1646430	-	857.5	0.687	2702	4.41	0	0.13
CP023154	1652170	1652320	-	2103.6	0.948	6701	6.21	0	0.07
CP023154	1653222	1653372	-	5754.9	0.713	17970	21.48	0	0.04
CP023154	1658798	1658948	-	2887.7	0.877	8994	7.54	0	0.07
CP023154	1662948	1663098	-	3816.4	0.944	11819	12.93	0	0.06
CP023154	1663481	1663631	-	6124.9	0.794	16328	23.46	0	0.06
CP023154	1674042	1674192	-	927.3	0.861	3067	4.21	0	0.12
CP023154	1675739	1675889	-	1410.3	0.52	4524	5.91	0	0.13
CP023154	1682539	1682689	-	5036.7	0.564	15887	21.95	0	0.07
CP023154	1683656	1683806	-	2564.7	0.746	8037	6.95	0	0.11
CP023154	1688042	1688192	-	4121.5	0.946	12932	14.7	0	0.06
CP023154	1688905	1689055	-	2172.5	0.876	7020	8.08	0	0.1
CP023154	1691919	1692069	-	1622.4	0.784	5067	5.6	0	0.12
CP023154	1699778	1699928	-	370952	0.986	741402	320.73	0	0.01
CP023154	1706693	1706843	-	793.6	0.751	2438	4.72	0	0.12
CP023154	1715597	1715747	-	2118.3	0.498	6740	8.16	0	0.07
CP023154	1716055	1716205	-	3167.1	0.813	9847	13.12	0	0.06
CP023154	1716613	1716763	-	1283.3	0.754	3966	4.86	0	0.08
CP023154	1726549	1726699	-	154888	0.923	391219	181.44	0	0.01
CP023154	1736851	1737001	-	714.9	0.801	2228	4.51	0	0.13
CP023154	1737411	1737561	-	901.6	0.737	3049	5.86	0	0.15
CP023154	1742554	1742704	-	1344.3	0.822	4187	7.89	0	0.12
CP023154	1743135	1743285	-	1341.7	0.61	4182	8.27	0	0.09
CP023154	1748626	1748776	-	4705.2	0.913	14596	5.18	0	0.05
CP023154	1749811	1749961	-	12508.7	0.548	40146	11.49	0	0.03
CP023154	1755968	1756118	-	28828.8	0.905	89229	12.63	0	0.02
CP023154	1757059	1757209	-	10565.2	0.434	32469	4.23	0	0.03
CP023154	1769917	1770067	-	1475.2	0.924	4602	8.56	0	0.12
CP023154	1779818	1779968	-	3973.3	0.552	11572	26.07	0	0.07
CP023154	1789656	1789806	-	1776	0.775	5471	12.04	0	0.11
CP023154	1790335	1790485	-	1294.1	0.58	4367	8.4	0	0.1
CP023154	1796920	1797070	-	597.5	0.276	1980	4.44	0	0.16
CP023154	1798377	1798527	-	918.9	0.874	2864	6.55	0	0.1
CP023154	1808742	1808892	-	1257.6	0.76	3873	9.1	0	0.1
CP023154	1810685	1810835	-	727.3	0.479	2284	4.59	0	0.16
CP023154	1812863	1813013	-	755.4	0.823	2466	4.73	0	0.14
CP023154	1823193	1823343	-	542	0.548	1772	4.34	0	0.18
CP023154	1832265	1832415	-	8188.1	0.843	22492	55	0	0.06
CP023154	1841227	1841377	-	1054.6	0.774	3511	5.53	0	0.17
CP023154	1851171	1851321	-	1244.5	0.83	3831	5.17	0	0.12
CP023154	1851513	1851663	-	2342.5	0.906	7313	10.59	0	0.07
CP023154	1853490	1853640	-	1051	0.785	3222	4.12	0	0.15
CP023154	1860043	1860193	-	9998.8	0.714	30876	15.81	0	0.04
CP023154	1862409	1862559	-	10213.5	0.928	31831	13.25	0	0.04
CP023154	1867443	1867593	-	28719.8	0.821	92515	50.39	0	0.02
CP023154	1872130	1872280	-	5594.1	0.853	17144	6.35	0	0.07
CP023154	1878532	1878682	-	3827.5	0.75	11885	5.59	0	0.07
CP023154	1879369	1879519	-	10787.1	0.887	30989	13.6	0	0.04
CP023154	1883734	1883884	-	16417.7	0.895	40167	31.4	0	0.06
CP023154	1888882	1889032	-	886.9	0.138	2762	6.62	0	0.1
CP023154	1889261	1889411	-	1478.8	0.762	4539	11.91	0	0.16
CP023154	11107	11257	+	3949.5	0.923	12025	8.4	0	0.17
CP023154	11421	11571	+	4701.6	0.595	16617	10.17	0	0.38
CP023154	12629	12779	+	3213.1	0.924	9758	6.37	0	0.14
CP023154	23394	23544	+	4687.9	0.912	17050	28.95	0	0.08
CP023154	29225	29375	+	758.3	0.682	2331	5.58	0	0.13
CP023154	30617	30767	+	589.3	0.512	1910	4.03	0	0.15
CP023154	31666	31816	+	1016.7	0.827	3308	7.3	0	0.22
CP023154	40381	40531	+	1070.3	0.766	3338	7.53	0	0.1
CP023154	42620	42770	+	934.8	0.868	2887	5.32	0	0.17
CP023154	45433	45583	+	933.9	0.776	3235	4.75	0	0.19
CP023154	48274	48424	+	1534.9	0.553	4754	9.63	0	0.11
CP023154	54974	55124	+	891.4	0.786	2777	5.45	0	0.18
CP023154	58804	58954	+	1676.5	0.786	5589	9.86	0	0.1
CP023154	61597	61747	+	1030.8	0.618	3160	6.11	0	0.12
CP023154	66390	66540	+	797.8	0.771	2522	5.27	0	0.11
CP023154	66775	66925	+	691.4	0.721	2191	5.15	0	0.25
CP023154	74014	74164	+	932.6	0.799	3009	6.89	0	0.1
CP023154	82144	82294	+	1562	0.398	4923	9.01	0	0.12
CP023154	89135	89285	+	2000.2	0.866	6522	8.13	0	0.08
CP023154	92226	92376	+	1375.7	0.721	4243	4.57	0	0.09
CP023154	99553	99703	+	829.5	0.779	2555	4.02	0	0.12
CP023154	102615	102765	+	758.6	0.71	2325	4.64	0	0.13
CP023154	110872	111022	+	637.6	0.618	2204	4.3	0	0.15
CP023154	114201	114351	+	1082	0.823	3423	6.14	0	0.13
CP023154	120618	120768	+	45256.3	0.766	82238	21.34	0	0.06
CP023154	121946	122096	+	12180.7	0.85	36360	4.56	0	0.03
CP023154	124277	124427	+	19562.6	0.894	42130	7.25	0	0.06
CP023154	124987	125137	+	11504.3	0.792	33049	4.1	0	0.05
CP023154	142736	142886	+	759.9	0.827	2652	4.43	0	0.21
CP023154	143269	143419	+	2526.2	0.593	6809	16.22	0	0.1
CP023154	150928	151078	+	637.3	0.756	2017	4.19	0	0.21
CP023154	159359	159509	+	3653.6	0.565	11197	16.93	0	0.05
CP023154	165216	165366	+	1191.6	0.734	3841	5.53	0	0.12
CP023154	166793	166943	+	1284.6	0.679	3937	4.96	0	0.1
CP023154	171701	171851	+	1738.8	0.886	5249	6.06	0	0.2
CP023154	172211	172361	+	3924.7	0.694	12077	17.29	0	0.05
CP023154	179423	179573	+	577.9	0.626	1878	4.09	0	0.22
CP023154	185630	185780	+	1585.8	0.455	5037	7.11	0	0.11
CP023154	187156	187306	+	1776	0.917	5931	7.01	0	0.1
CP023154	191779	191929	+	1977.7	0.719	6515	5.88	0	0.06
CP023154	192845	192995	+	4901	0.871	15470	19.2	0	0.04
CP023154	196287	196437	+	1579.3	0.561	4968	4.9	0	0.07
CP023154	200709	200859	+	742.7	0.815	2335	4.9	0	0.12
CP023154	202602	202752	+	657.2	0.881	2020	4.59	0	0.15
CP023154	206339	206489	+	1675.2	0.619	5210	16.11	0	0.08
CP023154	218675	218825	+	3571.3	0.721	10945	15.32	0	0.05
CP023154	220400	220550	+	2405.5	0.737	7887	9.41	0	0.06
CP023154	229231	229381	+	2245.3	0.826	6888	14.37	0	0.09
CP023154	239731	239881	+	3243.7	0.753	9955	9.52	0	0.06
CP023154	244456	244606	+	5964.7	0.965	12070	10.25	0	0.23
CP023154	244767	244917	+	4266	0.702	11459	7.51	0	0.19
CP023154	245241	245391	+	3294.6	0.87	7349	5.82	0	0.37
CP023154	245925	246075	+	4761.7	0.651	17421	8.62	0	0.05
CP023154	250220	250370	+	1503.3	0.735	4758	4.11	0	0.08
CP023154	252487	252637	+	773.3	0.735	2441	4.09	0	0.11
CP023154	259060	259210	+	12525	0.904	38257	38.07	0	0.04
CP023154	259601	259751	+	3564.2	0.477	11612	7.74	0	0.05
CP023154	265255	265405	+	3103.4	0.781	10051	18.31	0	0.1
CP023154	279198	279348	+	9742	0.977	30291	16.84	0	0.05
CP023154	283424	283574	+	3036.5	0.9	9101	4.23	0	0.16
CP023154	284513	284663	+	2845.6	0.819	9584	5.33	0	0.07
CP023154	290118	290268	+	1750.9	0.745	5372	11.55	0	0.1
CP023154	295793	295943	+	36679.2	0.979	59410	59.23	0	0.08
CP023154	296417	296567	+	5223.7	0.863	16030	4.77	0	0.16
CP023154	301882	302032	+	2127.8	0.848	6570	10.73	0	0.08
CP023154	308120	308270	+	1915.4	0.882	6178	11.64	0	0.11
CP023154	316864	317014	+	5953.6	0.752	17737	19.77	0	0.05
CP023154	322354	322504	+	1376	0.766	4360	4.66	0	0.12
CP023154	322980	323130	+	3740.4	0.944	11926	14.35	0	0.06
CP023154	328462	328612	+	1217.7	0.867	3750	7	0	0.09
CP023154	331484	331634	+	1189.4	0.629	3653	7.59	0	0.1
CP023154	338913	339063	+	667	0.321	2051	5.58	0	0.16
CP023154	346413	346563	+	1036.7	0.84	3259	6.7	0	0.12
CP023154	347140	347290	+	1831.8	0.623	5648	12.82	0	0.1
CP023154	353354	353504	+	3258.4	0.86	10539	9.7	0	0.05
CP023154	353955	354105	+	3857.2	0.888	12476	12.11	0	0.06
CP023154	360352	360502	+	589.9	0.705	1899	4.36	0	0.22
CP023154	364989	365139	+	594.2	0.753	1838	4.01	0	0.14
CP023154	367042	367192	+	928.3	0.811	2922	6.42	0	0.17
CP023154	372049	372199	+	635.6	0.76	2019	4.77	0	0.18
CP023154	378523	378673	+	4362	0.887	13696	10.66	0	0.06
CP023154	379045	379195	+	4788.4	0.763	14607	11.12	0	0.05
CP023154	384337	384487	+	2166	0.697	6672	7.18	0	0.11
CP023154	385327	385477	+	2092.2	0.913	7091	7.79	0	0.07
CP023154	393184	393334	+	1353.5	0.831	4637	7.97	0	0.12
CP023154	399342	399492	+	1023.9	0.96	3300	4.82	0	0.16
CP023154	401785	401935	+	1392.6	0.605	4355	6.34	0	0.08
CP023154	404932	405082	+	1378	0.653	4229	7.35	0	0.1
CP023154	417390	417540	+	772.7	0.549	2374	4.36	0	0.11
CP023154	423838	423988	+	746.2	0.579	2568	5.29	0	0.19
CP023154	424678	424828	+	786.1	0.629	2445	5.92	0	0.1
CP023154	429194	429344	+	632.7	0.82	2007	5.1	0	0.19
CP023154	431567	431717	+	611.2	0.745	2028	5.09	0	0.17
CP023154	441737	441887	+	2073	0.875	6541	15.07	0	0.09
CP023154	450823	450973	+	567.4	0.629	1780	4.9	0	0.16
CP023154	457220	457370	+	2271.7	0.741	7010	11.89	0	0.06
CP023154	457748	457898	+	855.9	0.516	2624	4.06	0	0.13
CP023154	463593	463743	+	806	0.539	2470	5.2	0	0.15
CP023154	466444	466594	+	930.6	0.694	2876	6.34	0	0.14
CP023154	481738	481888	+	731.2	0.819	2347	4.01	0	0.14
CP023154	487726	487876	+	2701.4	0.714	8305	13.08	0	0.06
CP023154	500633	500783	+	7895.1	0.853	24919	33.42	0	0.03
CP023154	508495	508645	+	102384	0.924	228119	214.87	0	0.02
CP023154	514427	514577	+	2406.8	0.709	7848	9.72	0	0.06
CP023154	519156	519306	+	1131.3	0.645	3893	4.36	0	0.09
CP023154	525559	525709	+	1660.2	0.706	5096	7.74	0	0.09
CP023154	527326	527476	+	1375.3	0.63	4286	6.09	0	0.08
CP023154	533922	534072	+	6176.5	0.794	19732	26.79	0	0.04
CP023154	545282	545432	+	1019	0.653	3128	6.63	0	0.11
CP023154	545678	545828	+	949.2	0.838	2920	6.2	0	0.12
CP023154	554120	554270	+	708.4	0.633	2207	4.29	0	0.14
CP023154	559765	559915	+	1103.9	0.606	3408	5.44	0	0.14
CP023154	561490	561640	+	1068.6	0.875	3372	5.44	0	0.11
CP023154	563662	563812	+	780.5	0.786	2398	4.1	0	0.13
CP023154	570208	570358	+	566.8	0.51	1746	4.2	0	0.15
CP023154	573692	573842	+	856.2	0.616	2631	5.45	0	0.11
CP023154	577540	577690	+	1317.3	0.786	4040	6.79	0	0.09
CP023154	585966	586116	+	760.6	0.889	2337	4.75	0	0.12
CP023154	588103	588253	+	657.2	0.71	2097	4.27	0	0.24
CP023154	588879	589029	+	706.8	0.728	2183	4.53	0	0.2
CP023154	605183	605333	+	1265.7	0.796	3919	10.31	0	0.1
CP023154	611012	611162	+	1097.7	0.823	3600	6.25	0	0.11
CP023154	613412	613562	+	989.7	0.794	3068	4.82	0	0.1
CP023154	617375	617525	+	1787.1	0.867	6082	7.24	0	0.09
CP023154	619256	619406	+	2573.8	0.712	7869	12.38	0	0.11
CP023154	621145	621295	+	1020.7	0.803	3164	4.2	0	0.09
CP023154	640596	640746	+	2037.1	0.797	6245	9.48	0	0.11
CP023154	640946	641096	+	1486	0.752	4643	6.66	0	0.08
CP023154	644565	644715	+	2034.1	0.864	6284	9.35	0	0.08
CP023154	648267	648417	+	1488.9	0.622	3353	8.4	0	0.21
CP023154	651591	651741	+	647.7	0.667	2101	4.86	0	0.29
CP023154	661311	661461	+	1011.2	0.699	3132	6.12	0	0.1
CP023154	666535	666685	+	1979.7	0.811	6360	7.84	0	0.08
CP023154	667566	667716	+	1680.4	0.778	5381	7.43	0	0.12
CP023154	674369	674519	+	9838.2	0.655	32265	4.53	0	0.03
CP023154	678307	678457	+	55070.4	0.899	92920	33.76	0	0.09
CP023154	684288	684438	+	1280.7	0.902	4237	4.87	0	0.09
CP023154	700509	700659	+	5821.2	0.461	19340	5.52	0	0.04
CP023154	702717	702867	+	8459.9	0.728	25512	7.98	0	0.03
CP023154	703171	703321	+	21470.1	0.913	64549	25.25	0	0.02
CP023154	711936	712086	+	689.1	0.819	2151	5.15	0	0.19
CP023154	713187	713337	+	637.6	0.777	2063	4.37	0	0.23
CP023154	713583	713733	+	621.9	0.913	2130	4.36	0	0.14
CP023154	716898	717048	+	867.3	0.589	2677	4.37	0	0.12
CP023154	721521	721671	+	1599.2	0.494	4925	8.47	0	0.09
CP023154	728439	728589	+	1314.7	0.714	4278	6.92	0	0.08
CP023154	731094	731244	+	1763.6	0.657	5742	11.66	0	0.12
CP023154	736711	736861	+	542	0.627	1795	4.2	0	0.16
CP023154	744118	744268	+	790.6	0.748	2531	4.61	0	0.23
CP023154	751819	751969	+	1778	0.484	5669	7.62	0	0.08
CP023154	754328	754478	+	2667.5	0.887	7644	13.36	0	0.11
CP023154	760118	760268	+	1044.2	0.632	3270	6.43	0	0.11
CP023154	765966	766116	+	557.6	0.74	1739	4.13	0	0.15
CP023154	782822	782972	+	1656.3	0.889	5175	12.16	0	0.08
CP023154	795085	795235	+	3142.6	0.785	9678	13.79	0	0.07
CP023154	796094	796244	+	2765.4	0.908	8851	11.92	0	0.06
CP023154	812347	812497	+	1035.7	0.807	3214	6.89	0	0.14
CP023154	813614	813764	+	1007.3	0.542	3276	7.37	0	0.12
CP023154	819045	819195	+	2582.3	0.843	8245	13.58	0	0.1
CP023154	824160	824310	+	3852.3	0.869	12032	7.39	0	0.05
CP023154	824946	825096	+	12807.9	0.675	44131	34.11	0	0.03
CP023154	839850	840000	+	2704.7	0.899	8429	8.23	0	0.08
CP023154	840174	840324	+	2262.6	0.771	7171	6.73	0	0.07
CP023154	840587	840737	+	5337.9	0.973	17268	18.24	0	0.05
CP023154	847307	847457	+	3233	0.814	9976	4.64	0	0.05
CP023154	849960	850110	+	8950	0.58	27357	14.31	0	0.03
CP023154	860053	860203	+	2034.8	0.65	6254	7.15	0	0.05
CP023154	860582	860732	+	1243.5	0.623	4556	4.26	0	0.15
CP023154	863220	863370	+	1579.3	0.872	4920	6.33	0	0.1
CP023154	873206	873356	+	992.3	0.813	3049	4.28	0	0.14
CP023154	875762	875912	+	2477.3	0.524	7807	12.23	0	0.05
CP023154	886702	886852	+	481.6	0.677	1488	5.6	0	0.15
CP023154	894362	894512	+	4277.8	0.553	13538	20.29	0	0.06
CP023154	895069	895219	+	1351.5	0.744	4190	5.38	0	0.09
CP023154	903676	903826	+	427.1	0.724	1495	4.41	0	0.21
CP023154	911564	911714	+	531.2	0.766	1726	4.09	0	0.14
CP023154	917880	918030	+	804.3	0.696	2482	4.44	0	0.13
CP023154	919315	919465	+	755.4	0.804	2395	4.04	0	0.12
CP023154	920257	920407	+	1167.2	0.422	3721	6.47	0	0.09
CP023154	927903	928053	+	1843.9	0.679	6189	9.68	0	0.08
CP023154	936683	936833	+	683.6	0.727	2207	4.74	0	0.16
CP023154	940237	940387	+	849	0.526	2651	6.91	0	0.14
CP023154	942304	942454	+	473.5	0.695	1462	4.03	0	0.25
CP023154	948766	948916	+	605.9	0.483	1900	4.41	0	0.16
CP023154	952665	952815	+	750.8	0.542	2558	4.22	0	0.15
CP023154	956997	957147	+	2138.6	0.954	6515	12.68	0	0.1
CP023154	961984	962134	+	1150.9	0.789	3732	6.25	0	0.14
CP023154	970017	970167	+	3010.8	0.767	9692	6.29	0	0.08
CP023154	973709	973859	+	3944.9	0.941	14881	7.46	0	0.06
CP023154	974010	974160	+	7271.9	0.83	22378	13.4	0	0.06
CP023154	978776	978926	+	4850.4	0.933	15497	8.68	0	0.05
CP023154	979674	979824	+	5261.6	0.717	17008	11.92	0	0.05
CP023154	982950	983100	+	2197.9	0.828	6843	4.51	0	0.09
CP023154	989590	989740	+	3562.2	0.802	11012	4.4	0	0.06
CP023154	990200	990350	+	4435	0.664	15064	5.54	0	0.05
CP023154	993465	993615	+	11484.7	0.914	37414	17.72	0	0.04
CP023154	998612	998762	+	33997	0.726	89763	110.31	0	0.03
CP023154	1007427	1007577	+	1325.8	0.719	4422	5.56	0	0.13
CP023154	1010881	1011031	+	2092.9	0.859	6689	4.24	0	0.14
CP023154	1012319	1012469	+	1879.8	0.728	5780	4.03	0	0.08
CP023154	1013156	1013306	+	9048.9	0.881	30034	26.43	0	0.03
CP023154	1019684	1019834	+	577.2	0.349	1856	5.39	0	0.17
CP023154	1029328	1029478	+	4322.8	0.683	13600	10.77	0	0.05
CP023154	1032787	1032937	+	4152.1	0.913	12942	8.19	0	0.07
CP023154	1040019	1040169	+	11310.8	0.924	33360	16.32	0	0.04
CP023154	1041501	1041651	+	7262.4	0.908	24178	10.85	0	0.04
CP023154	1062397	1062547	+	641.8	0.719	2107	4.39	0	0.14
CP023154	1063433	1063583	+	767.8	0.711	2451	5.29	0	0.11
CP023154	1068936	1069086	+	1702.3	0.691	6132	8.47	0	0.17
CP023154	1069439	1069589	+	877.4	0.623	2919	4.01	0	0.15
CP023154	1071098	1071248	+	1119.2	0.814	4189	5.2	0	0.11
CP023154	1079345	1079495	+	3002.6	0.671	9303	10.99	0	0.04
CP023154	1079750	1079900	+	4646.5	0.856	14440	18.83	0	0.04
CP023154	1080851	1081001	+	1347.9	0.746	4216	4.59	0	0.11
CP023154	1089524	1089674	+	592.6	0.759	1856	4.44	0	0.15
CP023154	1094536	1094686	+	914	0.729	2960	6.47	0	0.21
CP023154	1100910	1101060	+	855.9	0.654	2678	4.6	0	0.12
CP023154	1102328	1102478	+	1876.9	0.843	6226	11.52	0	0.08
CP023154	1110525	1110675	+	800.1	0.604	2494	4.01	0	0.12
CP023154	1114937	1115087	+	2697.5	0.899	9261	14.06	0	0.07
CP023154	1119661	1119811	+	1855.3	0.768	5796	4.1	0	0.1
CP023154	1123100	1123250	+	2333.4	0.894	9309	6.08	0	0.09
CP023154	1123742	1123892	+	4387.7	0.791	13974	11.57	0	0.06
CP023154	1129257	1129407	+	1284.3	0.641	4014	4.34	0	0.09
CP023154	1129902	1130052	+	2336.6	0.677	7631	7.83	0	0.06
CP023154	1130521	1130671	+	2135	0.695	6686	7.04	0	0.07
CP023154	1134756	1134906	+	1643.9	0.749	5096	7.4	0	0.12
CP023154	1139749	1139899	+	873.8	0.619	3121	4.94	0	0.15
CP023154	1141034	1141184	+	1661.2	0.672	5093	10.31	0	0.11
CP023154	1143654	1143804	+	1526.1	0.736	4868	7.84	0	0.09
CP023154	1156612	1156762	+	1872.6	0.769	5874	6.8	0	0.08
CP023154	1157533	1157683	+	1723.8	0.686	5445	6.41	0	0.09
CP023154	1158967	1159117	+	1568.5	0.651	4836	5.99	0	0.08
CP023154	1164306	1164456	+	4702.3	0.943	15435	12.75	0	0.08
CP023154	1168802	1168952	+	3972.4	0.869	12182	4.16	0	0.07
CP023154	1172134	1172284	+	3563.8	0.616	10966	4.32	0	0.05
CP023154	1172798	1172948	+	5039.7	0.716	16571	6.49	0	0.04
CP023154	1173249	1173399	+	6288.1	0.858	19721	8.43	0	0.03
CP023154	1179818	1179968	+	1481.1	0.707	4778	6.54	0	0.11
CP023154	1180384	1180534	+	1656.3	0.865	5264	7.35	0	0.08
CP023154	1185929	1186079	+	2243.6	0.811	8059	12.5	0	0.1
CP023154	1190650	1190800	+	912.3	0.602	2850	5.35	0	0.14
CP023154	1194120	1194270	+	525	0.404	1638	4.03	0	0.19
CP023154	1200587	1200737	+	891.4	0.755	2741	5.48	0	0.12
CP023154	1201785	1201935	+	1122.5	0.713	3699	4.17	0	0.16
CP023154	1205672	1205822	+	1223.6	0.601	3755	4.8	0	0.1
CP023154	1206625	1206775	+	5343.8	0.868	16242	26.3	0	0.09
CP023154	1220030	1220180	+	603.7	0.768	1875	4.28	0	0.17
CP023154	1221629	1221779	+	535.8	0.791	1644	4.22	0	0.19
CP023154	1222662	1222812	+	609.5	0.81	1976	5.05	0	0.2
CP023154	1229344	1229494	+	837	0.815	2656	4.44	0	0.13
CP023154	1229664	1229814	+	917.9	0.821	2875	4.98	0	0.13
CP023154	1237100	1237250	+	1162.3	0.619	4092	6.99	0	0.14
CP023154	1248050	1248200	+	546.6	0.717	1710	4.04	0	0.18
CP023154	1250842	1250992	+	1328	0.573	4393	9.28	0	0.08
CP023154	1255218	1255368	+	1383.2	0.76	4292	7.02	0	0.08
CP023154	1256260	1256410	+	1332.3	0.825	4090	7.15	0	0.09
CP023154	1261403	1261553	+	1383.2	0.816	4630	6.13	0	0.2
CP023154	1268607	1268757	+	34584.7	0.821	102194	38.62	0	0.02
CP023154	1269133	1269283	+	20434.8	0.866	63451	17.08	0	0.02
CP023154	1274575	1274725	+	30408.1	0.84	91751	28	0	0.02
CP023154	1281848	1281998	+	1018.7	0.858	3210	4.58	0	0.11
CP023154	1283684	1283834	+	2402.2	0.782	7478	13.66	0	0.06
CP023154	1290965	1291115	+	1594.3	0.763	5107	5.48	0	0.08
CP023154	1291471	1291621	+	4117.2	0.662	12735	7.69	0	0.09
CP023154	1296406	1296556	+	18005.5	0.828	54346	4.77	0	0.02
CP023154	1297705	1297855	+	86885.8	0.559	242161	32.18	0	0.01
CP023154	1307050	1307200	+	6549.1	0.907	17135	5.02	0	0.07
CP023154	1308046	1308196	+	27755.6	0.947	89756	26.82	0	0.02
CP023154	1321545	1321695	+	1092.8	0.869	3361	4.9	0	0.12
CP023154	1328209	1328359	+	5761.1	0.694	17679	16.67	0	0.04
CP023154	1333808	1333958	+	1310.7	0.709	4130	8	0	0.1
CP023154	1343885	1344035	+	1885.7	0.809	6170	8	0	0.12
CP023154	1344726	1344876	+	1058.5	0.809	3245	4.07	0	0.11
CP023154	1345322	1345472	+	3303.8	0.497	11700	14.48	0	0.06
CP023154	1351059	1351209	+	1451.4	0.575	4512	4.08	0	0.08
CP023154	1352283	1352433	+	3266.6	0.836	10043	10.42	0	0.05
CP023154	1354268	1354418	+	5010	0.94	16198	16.81	0	0.08
CP023154	1363322	1363472	+	3364.1	0.671	11101	14.5	0	0.05
CP023154	1364373	1364523	+	1473.6	0.789	4674	4.15	0	0.12
CP023154	1368512	1368662	+	1778	0.917	5819	4.44	0	0.09
CP023154	1369010	1369160	+	1808.7	0.566	5743	4	0	0.1
CP023154	1374493	1374643	+	5965.1	0.865	20619	7.43	0	0.05
CP023154	1376829	1376979	+	11904	0.686	32012	15.86	0	0.04
CP023154	1381923	1382073	+	8640.7	0.952	31082	21.04	0	0.05
CP023154	1389630	1389780	+	11807.1	0.685	35612	24.4	0	0.03
CP023154	1400400	1400550	+	952.8	0.653	3120	5.24	0	0.12
CP023154	1406786	1406936	+	990.3	0.718	3112	8.79	0	0.22
CP023154	1414790	1414940	+	3181.7	0.732	9830	5.11	0	0.07
CP023154	1415551	1415701	+	4367.2	0.634	14265	7.18	0	0.04
CP023154	1416036	1416186	+	10023.2	0.913	30784	19.33	0	0.04
CP023154	1423822	1423972	+	2910.9	0.734	10224	7.85	0	0.07
CP023154	1426482	1426632	+	2638.4	0.826	8564	6.3	0	0.09
CP023154	1429421	1429571	+	1421.7	0.751	4363	5.2	0	0.13
CP023154	1431515	1431665	+	1703	0.761	5221	8.02	0	0.07
CP023154	1452132	1452282	+	3840.2	0.906	12086	12.95	0	0.1
CP023154	1454868	1455018	+	6515.9	0.914	18975	25.53	0	0.04
CP023154	1463114	1463264	+	728.6	0.753	2251	4.07	0	0.15
CP023154	1469129	1469279	+	2473.7	0.559	8179	9.13	0	0.07
CP023154	1470733	1470883	+	2549.7	0.702	8575	9.08	0	0.09
CP023154	1474995	1475145	+	1751.9	0.788	4290	6.02	0	0.15
CP023154	1476462	1476612	+	4517.6	0.861	15144	27.94	0	0.11
CP023154	1486397	1486547	+	7174.7	0.844	22403	43.37	0	0.04
CP023154	1491422	1491572	+	1732	0.898	5500	6.07	0	0.1
CP023154	1492887	1493037	+	2895.2	0.789	9183	11.13	0	0.05
CP023154	1493665	1493815	+	1729.1	0.805	5378	6.28	0	0.14
CP023154	1499971	1500121	+	2106.3	0.846	6590	9.7	0	0.08
CP023154	1508113	1508263	+	1828.9	0.495	5667	8.71	0	0.07
CP023154	1509070	1509220	+	3481.6	0.817	11009	20.41	0	0.08
CP023154	1514322	1514472	+	624.9	0.862	1937	4.26	0	0.2
CP023154	1515249	1515399	+	722.4	0.759	2236	5.09	0	0.26
CP023154	1521553	1521703	+	2630.9	0.77	8517	7.93	0	0.08
CP023154	1522388	1522538	+	2345.1	0.633	7283	7.13	0	0.07
CP023154	1533993	1534143	+	1213.5	0.561	3777	6.86	0	0.1
CP023154	1538243	1538393	+	927	0.85	2948	4.82	0	0.12
CP023154	1544909	1545059	+	4422.3	0.681	13154	4.01	0	0.05
CP023154	1545648	1545798	+	20278.1	0.925	62303	23.44	0	0.02
CP023154	1547076	1547226	+	8382.6	0.872	25819	7.7	0	0.04
CP023154	1552505	1552655	+	7273.2	0.708	22186	11.58	0	0.03
CP023154	1554326	1554476	+	3385.7	0.679	12281	4.71	0	0.07
CP023154	1559081	1559231	+	1744.4	0.741	5513	4.32	0	0.1
CP023154	1565000	1565150	+	2820.9	0.877	8711	4.22	0	0.13
CP023154	1567024	1567174	+	14992.1	0.95	49056	30.7	0	0.04
CP023154	1574179	1574329	+	1466.4	0.816	4549	7.65	0	0.09
CP023154	1578224	1578374	+	2453.4	0.498	7950	12.56	0	0.06
CP023154	1584521	1584671	+	55886.5	0.776	158712	70.52	0	0.02
CP023154	1586280	1586430	+	8354.5	0.624	26747	5.32	0	0.04
CP023154	1594156	1594306	+	1624.6	0.737	5382	5.33	0	0.1
CP023154	1598141	1598291	+	2874.4	0.777	8911	9.65	0	0.06
CP023154	1600355	1600505	+	1941.2	0.797	6192	7.49	0	0.1
CP023154	1600715	1600865	+	1383.8	0.674	4523	5.1	0	0.11
CP023154	1608290	1608440	+	2190.1	0.771	6542	9.52	0	0.09
CP023154	1608811	1608961	+	2384.6	0.877	7397	9.98	0	0.07
CP023154	1616576	1616726	+	24262.9	0.551	74801	32.6	0	0.03
CP023154	1625036	1625186	+	974.7	0.554	2990	6.34	0	0.11
CP023154	1628253	1628403	+	933.9	0.497	2920	5.71	0	0.12
CP023154	1631792	1631942	+	1209.9	0.861	3733	9.25	0	0.12
CP023154	1641371	1641521	+	666	0.601	2185	4.99	0	0.17
CP023154	1643824	1643974	+	644.1	0.778	1991	5.08	0	0.13
CP023154	1644645	1644795	+	621.9	0.822	1931	4.77	0	0.16
CP023154	1655732	1655882	+	78966.2	0.986	173724	148.17	0	0.02
CP023154	1662526	1662676	+	1639.7	0.752	5175	9.28	0	0.07
CP023154	1672347	1672497	+	1105.8	0.539	3406	5.66	0	0.1
CP023154	1672761	1672911	+	830.4	0.712	2971	4.17	0	0.14
CP023154	1673282	1673432	+	918.2	0.7	2840	4.74	0	0.11
CP023154	1673627	1673777	+	905.2	0.754	2974	4.8	0	0.2
CP023154	1681967	1682117	+	9034.2	0.497	29359	15.43	0	0.03
CP023154	1682627	1682777	+	5262.5	0.529	18373	8.29	0	0.04
CP023154	1690094	1690244	+	746.6	0.624	2353	4.03	0	0.12
CP023154	1695903	1696053	+	4486.6	0.746	13768	16.58	0	0.05
CP023154	1697914	1698064	+	3257.8	0.855	10022	11.49	0	0.05
CP023154	1706355	1706505	+	1200.5	0.6	3712	9.44	0	0.1
CP023154	1712142	1712292	+	9048.6	0.862	28666	21.43	0	0.04
CP023154	1714310	1714460	+	6065.9	0.701	22081	11.65	0	0.04
CP023154	1718131	1718281	+	1721.6	0.703	5353	4.73	0	0.09
CP023154	1719369	1719519	+	1059.8	0.808	3252	4.1	0	0.11
CP023154	1725374	1725524	+	2323.2	0.519	7138	6.62	0	0.1
CP023154	1725996	1726146	+	4875.9	0.869	15114	15.2	0	0.04
CP023154	1726411	1726561	+	2162.1	0.325	6682	5.66	0	0.09
CP023154	1731579	1731729	+	1722.2	0.906	5451	8.03	0	0.14
CP023154	1732860	1733010	+	1476.5	0.823	4777	6.45	0	0.09
CP023154	1735558	1735708	+	1668.7	0.874	5150	7.1	0	0.1
CP023154	1742311	1742461	+	718.5	0.645	2265	4.19	0	0.14
CP023154	1746765	1746915	+	2059.3	0.73	6683	13.64	0	0.07
CP023154	1748571	1748721	+	851	0.797	2750	5.44	0	0.13
CP023154	1752544	1752694	+	1039.9	0.446	3212	9.84	0	0.09
CP023154	1754677	1754827	+	460.1	0.306	1459	4.16	0	0.19
CP023154	1759822	1759972	+	559.3	0.574	1744	5.16	0	0.2
CP023154	1765411	1765561	+	777.2	0.543	2401	6.03	0	0.14
CP023154	1772421	1772571	+	13446.8	0.543	42374	27.21	0	0.02
CP023154	1774160	1774310	+	7982.6	0.749	23425	12.82	0	0.03
CP023154	1779934	1780084	+	3294.6	0.478	10272	6.48	0	0.06
CP023154	1781511	1781661	+	9078.6	0.752	28755	23.03	0	0.03
CP023154	1787277	1787427	+	3885.2	0.752	11972	4.28	0	0.05
CP023154	1789346	1789496	+	6024.1	0.678	19512	5.33	0	0.04
CP023154	1792255	1792405	+	15977.5	0.717	47724	15.49	0	0.03
CP023154	1796981	1797131	+	2512.5	0.538	7725	4.15	0	0.05
CP023154	1808557	1808707	+	2096.8	0.793	7111	4.38	0	0.08
CP023154	1809631	1809781	+	3922.8	0.879	12028	8.49	0	0.05
CP023154	1810496	1810646	+	3416	0.939	10539	7.18	0	0.08
CP023154	1816154	1816304	+	3166.4	0.679	9973	13.78	0	0.06
CP023154	1828084	1828234	+	8851.2	0.96	30994	30.66	0	0.05
CP023154	1842875	1843025	+	668.6	0.88	2082	4.25	0	0.14
CP023154	1844001	1844151	+	1016.4	0.745	3211	6.28	0	0.18
CP023154	1845690	1845840	+	867.3	0.701	2836	5.4	0	0.16
CP023154	1851082	1851232	+	876.1	0.758	2713	4.62	0	0.15
CP023154	1852714	1852864	+	897.3	0.807	2990	4.29	0	0.13
CP023154	1854305	1854455	+	1711.4	0.954	5350	9.22	0	0.1
CP023154	1857044	1857194	+	971.1	0.638	3197	4.8	0	0.12
CP023154	1865704	1865854	+	849.7	0.859	2680	5.56	0	0.15
CP023154	1879122	1879272	+	1724.2	0.657	5383	6.62	0	0.14
CP023154	1880071	1880221	+	1608.3	0.743	5572	6.29	0	0.09
CP023154	1880607	1880757	+	3062.6	0.763	9492	11.09	0	0.06
CP023154	1885303	1885453	+	1956.2	0.569	6001	4.53	0	0.08
CP023154	1886022	1886172	+	2252.4	0.691	7297	6.32	0	0.09
CP023154	1888979	1889129	+	9000	0.91	24551	42.66	0	0.1

## Sheet: Normalized counts Salmon
Table S1. Salmon quantification data (NumReads) using the homer derived regions as reference transcriptome.
chr	start	end	strand	PfuSmAP1-Strep 1	PfuSmAP1-Strep 2	PfuSmAP1-Strep 3	Strep-tag 1	Strep-tag 2	Strep-tag 3
CP023154	517	670	-	1221.40241624017	1441.65432907673	1113.01464573784	1725.36900454233	1700.50558498081	1834.82099796526
CP023154	1324	1479	-	639.056403630653	374.910305880168	444.719869309152	1301.52529519184	1225.96046068684	1101.46652621427
CP023154	8180	8331	-	3175.35606786317	3150.69451296704	3616.94130173931	2440.41531937077	2433.34914953491	2866.50714964995
CP023154	10798	10948	-	129836.56235244	50462.6753816855	143162.124118891	6076.51390263542	5762.47989921962	4436.80762235364
CP023154	11104	11257	+	38394.6993211579	17546.8325767991	33420.0552362137	26173.851197764	20715.5103369433	9917.09431906407
CP023154	11421	11706	+	26091.1655913416	12707.4296482007	15226.4799184675	73515.6376113023	46188.5001683032	19991.4597089516
CP023154	12629	12780	+	11328.283993107	5166.2653403025	7823.72938377606	21577.6726092395	17428.3622432695	9152.62431779855
CP023154	14503	14653	-	326.28613094092	977.074525910798	526.712884695683	3385.2983828045	3623.08714835084	3916.50278232306
CP023154	23394	23544	+	48150.0216631284	71633.187908546	70824.4295124759	8967.47188689647	7392.41263341116	6047.33241691765
CP023154	25636	25794	-	182.123764182134	372.6781603822	311.756671705124	1239.34145537472	1263.47643419286	1454.69334222537
CP023154	33016	33166	-	81255.6161207781	43330.047628313	63592.2259243733	4726.52728001476	5497.99319974239	6320.81552845181
CP023154	35020	35235	-	42772.9047145619	58910.4684469568	38404.6496385392	3233.51488947286	4079.4970421905	4505.52927039299
CP023154	36094	36244	-	1516.02888469285	2497.38036763535	2560.93670868343	3339.90467739306	3474.78002027102	3372.63646368114
CP023154	40380	40531	+	1486.98012659343	1914.55093433842	1609.97665926874	924.243809713407	1045.66052389939	1127.89093307009
CP023154	41102	41252	-	2413.04760920121	1916.42829348751	1661.47922786078	3531.20157738282	2947.9621436278	3276.93454309559
CP023154	42619	42771	+	1397.62352264839	1843.04406726698	1901.9520293972	2020.46934984527	1731.56667289051	2063.82310331858
CP023154	48273	48424	+	1183.82347832199	1743.48131836149	1982.65932474052	3810.7158988469	4060.37728004253	2477.12078391603
CP023154	49221	49468	-	11470.4952665294	4008.6055606571	6180.25662924983	7641.79533609709	8702.00058359143	5177.28099721357
CP023154	58804	58954	+	2471.69906273662	5029.13258684628	4192.42275302296	2438.59476050058	2756.84389770712	2850.22465274816
CP023154	60719	60894	-	8094.95495447327	3963.67552654767	6167.45109135804	3733.17254665542	3415.37322630437	2924.70041786789
CP023154	61597	61747	+	73.574978118326	135.040324025304	127.267846386181	2758.40299193377	2677.87933580176	1597.48060060335
CP023154	66328	66540	+	1225.8699897486	2204.96108887259	1297.86550707034	1559.83020050598	1629.66105655758	1537.23114937496
CP023154	66875	67026	-	4154.73545002	3869.74885944019	3825.65156296562	1333.85219974883	1301.89034501206	1369.25801048309
CP023154	71990	72141	-	3160.63095445225	1225.50507783139	1871.82138239351	2960.95462983112	2942.22560168419	2064.8149240133
CP023154	72671	72824	-	3889.55725206231	3092.30561300115	3898.33965782461	980.493403143172	1119.92805781023	1205.04871701185
CP023154	74014	74165	+	3678.93422309647	1519.91214611055	2223.11418233889	1683.0817839977	1475.24092357723	727.416656987001
CP023154	79862	80032	-	237.36344047397	552.860295587238	469.894981246761	1728.65919413662	1730.52967799094	1684.34924028115
CP023154	82142	82294	+	2432.74635064438	4897.97139923229	3392.75916345338	4482.65716069122	4023.80521197896	4818.52256467554
CP023154	86166	86419	-	29029.3286223951	29548.1025544947	30990.8135435998	30447.4615959273	28462.3311771837	24026.1806601188
CP023154	86757	86919	-	38620.4386394123	16871.8512471554	19316.2742359022	4540.29106051105	5001.33320577323	6555.61135389272
CP023154	89135	89285	+	1497.73972247163	2803.68759078094	2041.60263202084	3836.17182359039	3622.70499810157	4110.71829602817
CP023154	102615	102798	+	2604.40852641786	2931.47054358881	2336.70504333532	2264.95112236672	2090.30011365074	2381.55459074799
CP023154	102997	103151	-	1847.34077033627	2542.25874734866	2679.945044163	4647.67917576813	4591.59905964217	4745.84434207896
CP023154	107237	107387	-	704.848647006514	2631.2117230661	1720.09660075072	4151.27728848754	4390.90977402023	4173.72529382701
CP023154	110872	111025	+	6829.69501740076	2562.91016272248	4130.87219881766	1338.39939100166	1162.8537124292	1151.33826511292
CP023154	118288	118472	-	1930.25269722946	1260.24711502565	1660.81701373217	2548.1728270541	3183.33010725721	3370.35905845834
CP023154	120618	120768	+	1719299.53949741	362829.554108725	821575.761426165	139458.068330588	201980.402671163	106314.800992578
CP023154	121937	122096	+	905331.101534621	809040.652817695	413671.966480161	26215.4468051288	40717.2373032476	14226.6456201559
CP023154	124277	124427	+	1211123.77100644	726186.385498988	1134059.3858655	23391.209200511	34484.790547152	17127.3226435797
CP023154	124987	125137	+	1640000.7528752	662459.087064061	1296085.31845939	14491.8329584278	19811.6309289337	10223.7248171685
CP023154	138919	139099	-	2485.39589145687	4693.76641646389	4233.45166682804	6751.00050562545	5964.77321988851	6438.55956833503
CP023154	143269	143458	+	3308.9131517224	3361.31361313352	3236.31695087269	2901.7282230636	2935.98387692358	3840.72081720123
CP023154	146245	146403	-	10229.3743344279	7221.95724894907	7957.40019218128	3772.96399713802	3949.36673545787	3415.67021938892
CP023154	153173	153324	-	2786.81233607606	4927.51328039737	3577.50293995353	1744.84281767606	2383.11945239693	2671.10993084589
CP023154	153700	153877	-	6925.20322365333	8572.26434279879	8808.14570142192	3190.75950215404	2690.50000415615	3521.07969236797
CP023154	159359	159509	+	854.487295297614	4201.18344462152	2804.10661726638	637.730748450836	635.08348193738	927.28642257028
CP023154	159360	159545	-	11678.0818443652	6318.09141245886	9116.02280027225	3186.33010100017	2794.02809050281	2870.03799358211
CP023154	165177	165380	-	2800.45337757743	3021.23848499611	3449.59326723408	4150.60549762469	3782.8904949337	3611.53436662551
CP023154	165216	165368	+	0	229.001253601754	8.95201718975042	82.3848232998463	105.007892104079	106.381288849667
CP023154	165588	165754	-	3562.64547423321	2495.54617760504	2593.41915689784	859.610341443927	950.357008052509	877.739162142978
CP023154	166793	166943	+	680.680339330225	1846.48471237996	1502.10586163173	2344.39145620992	2069.90916802702	2068.51697862045
CP023154	171668	171851	+	260.19517880253	566.381900597579	751.213603868165	1979.56966734855	1804.18717686645	1696.65507178194
CP023154	172186	172361	+	712.644476466144	772.988575908782	613.051898448151	5257.27737519286	5917.55910241561	4924.54178080112
CP023154	187156	187307	+	1954.67322081989	1028.85016601053	1412.82138804514	1033.17749272553	1283.60348299158	1650.23704776578
CP023154	191779	191929	+	10210.1102991733	7251.57510010303	8120.43439692541	1768.63610580152	2066.44015707425	2297.88438277903
CP023154	192845	192997	+	10974.127231045	22431.2790852077	19269.8000279618	3452.14175111707	3697.07474983972	3835.37316226269
CP023154	193801	193954	-	224.522547503493	566.978519089624	639.871006513596	1214.19944901215	1197.45202620159	1282.97106944497
CP023154	196200	196378	-	833.995071411063	1570.5352800196	1057.95380698217	2394.61275768687	2479.0570322705	3531.39024094635
CP023154	196287	196437	+	1899.59817818553	1357.33351494418	2402.43942927733	1448.649705917	1388.05959602524	1112.52841375404
CP023154	197793	197946	-	1958.56977369717	2257.55198114685	2193.10942206811	2874.52501022129	2451.71151909933	2578.7831863367
CP023154	200709	200863	+	291.539114723846	960.095886736761	1032.23224321125	1330.89031495134	1199.76615840778	996.125330032377
CP023154	202595	202752	+	418.800435421241	492.104960241795	566.373225674182	722.483481972839	678.184045216648	564.242655518065
CP023154	203813	203964	-	72.9626127359252	161.60466587528	120.187779171929	1376.913711098	1222.61771934355	1153.6266401979
CP023154	204247	204413	-	173.920052720383	170.330678027938	245.072447736137	896.885349809638	954.965350605616	913.182027963569
CP023154	204859	205010	-	282.085249769512	297.303722153233	340.17980346379	1306.78568642545	1113.3050974285	1179.58736595496
CP023154	206334	206489	+	842.827970206314	1084.75094663276	1193.28010603543	1190.82082438082	1047.0244639612	1236.63534946885
CP023154	209885	210035	-	3617.75488382128	3053.11828546709	3186.88005276534	1781.67848519034	2380.48167561676	2167.14175467875
CP023154	210680	210830	-	12666.5352270894	12909.1981720775	12989.3691479179	4019.72289827591	4801.12283115926	4979.59098659361
CP023154	211394	211553	-	28158.0213264227	15804.205309895	15800.1186595574	1797.83489817984	2453.35626092039	3172.58004805562
CP023154	216609	216760	-	8169.83729305916	6286.15953491437	9138.58043505583	1084.46360275387	1165.05879180197	1304.32884965574
CP023154	217246	217397	-	5536.23592587058	3776.67964071281	3681.90684861176	1149.88715481636	1215.83709092295	1409.79982827258
CP023154	218675	218826	+	2646.78847274564	5379.38803593035	4872.13182927502	4941.07450739611	5425.72038595527	5236.68234139939
CP023154	220400	220550	+	15444.7477925248	8227.84222540868	9690.72141495616	1581.9190611704	1894.33196290055	2322.63626812338
CP023154	222408	222561	-	65.9305105411689	273.110534369541	148.611707175418	2657.65918342327	2534.00156808257	2419.75710619938
CP023154	229231	229385	+	2826.24569178269	3015.73352365677	2360.83227040912	4515.63827881638	4186.2906844426	3722.25706958053
CP023154	230216	230366	-	1006.34962780479	922.368239457659	909.104432334298	2372.38035129981	2265.50542599431	2010.61257160767
CP023154	231624	231774	-	1539.75496440383	886.667002989482	949.451291691039	5652.21015193756	5765.47049377851	5186.5908084109
CP023154	233539	233689	-	2300.74075511323	2199.92089908468	2835.31173309784	2052.08386867962	1895.69630631104	1633.75365668709
CP023154	239687	239881	+	567.544023672303	1452.77661510192	466.601067245056	4820.4732415698	4460.10088578038	4443.29509548658
CP023154	239699	239851	-	1292.9556817452	858.716938404443	2461.08009587059	82.0166487318684	143.191999303032	566.233638438384
CP023154	244455	244607	+	46328.4634109922	10938.6124526937	24978.3183071957	42358.4007242226	22550.590978618	16852.5281006688
CP023154	245241	245393	+	18972.9740029368	18301.5416419604	24959.9895925685	13977.0887863091	8834.78842043478	7993.13742997529
CP023154	245925	246075	+	8688.93411915725	2591.94101669405	4793.94247798209	6565.95846084653	6273.02356727182	5928.44396019568
CP023154	256394	256544	-	31301.9808628411	41078.5754065901	35487.5861697904	7252.00582943462	5622.83589266614	5160.20335446867
CP023154	259060	259210	+	5937.45303675117	6832.58038963269	8460.2188987018	43794.1131711483	38689.2465833058	35214.3855754187
CP023154	259546	259696	-	443.95584355351	640.752292610998	565.500489854398	959.273408115403	913.485900378769	962.224211770766
CP023154	259601	259751	+	2808.96068576506	1037.04710574548	846.229201840394	2540.21847482464	2437.64674885521	2150.80139705571
CP023154	265250	265405	+	1751.39900240075	1750.76247745561	1773.5892217169	4956.63695840679	4168.71957561304	4032.10774304295
CP023154	267147	267298	-	3042.6318656216	2721.74555282158	2104.93106049172	2500.86809866819	2506.21298703681	2633.30113185126
CP023154	272501	272652	-	633.806982509911	972.801095172898	884.568261021329	1002.59826638122	950.262455204712	903.676431133168
CP023154	279198	279348	+	10246.9034894406	7369.8567516731	7896.7686940309	7170.00671340081	6992.22255583761	7890.58380215007
CP023154	280168	280319	-	7928.48956801536	8009.17281569209	8836.19825092759	2086.07637594284	1747.87042893123	1425.20848188867
CP023154	284513	284663	+	3415.6344964802	2704.55545609238	3122.19062816019	1517.06169431968	1947.92406954823	2083.05500109081
CP023154	287232	287398	-	3332.4007774999	4404.2914379757	5034.75063115378	2809.81314831827	2457.44490386979	1733.38243411337
CP023154	290117	290268	+	1301.60819262095	1069.62800938574	1542.02611517944	1750.58369181566	1813.12594392656	1803.64259296326
CP023154	295791	295945	+	19848.056975991	12745.3967525815	12184.3088783178	220609.33550101	188637.311375957	102250.940193177
CP023154	296347	296498	-	6165.48363669846	34730.8642196534	24803.1115021716	8683.34949714075	6043.95543175942	5357.91613663283
CP023154	296417	296568	+	36083.8102366806	25092.8825449862	23834.0286095879	16404.8399396138	12473.9366065204	8847.30213866949
CP023154	299609	299759	-	1682.84232480199	1468.50371255534	1708.83552070994	1312.45845940442	1385.53398243681	1750.12525673581
CP023154	301881	302032	+	8340.38146005593	4674.16153112181	4431.69295741019	1752.61351017118	1659.63126002043	2022.08318419362
CP023154	304306	304473	-	946.824928982609	892.644036681832	606.612911737367	2101.36096385054	2044.59153441004	2109.41360542552
CP023154	308120	308271	+	1280.49716903558	1924.57969779925	1760.4615052971	1983.04284785789	1853.52890459438	2311.17141582158
CP023154	310757	310907	-	8273.6329207923	3965.99828248281	5615.97044342811	2804.62345959123	3005.38780027427	3085.13115600984
CP023154	311122	311275	-	10143.4752904176	5607.50202269422	7003.33299932	916.708177584233	1037.25642669222	1147.77453844664
CP023154	317044	317198	-	63775.5674349729	297294.556714549	128649.715250251	9375.81567119049	7970.13313965498	6980.3071638269
CP023154	319071	319221	-	6517.11865206209	2326.2448072157	3663.31177835136	8149.61378476798	8039.2421666847	5964.10517754427
CP023154	322980	323130	+	9799.25300785522	8056.80018963769	7390.09740788209	2128.183534968	2413.83052452626	2912.04667206566
CP023154	325111	325261	-	99.2219442057891	157.392964163966	119.006234594513	1894.83093432456	1848.04448044066	1030.88579761533
CP023154	328320	328612	+	370.753367280251	597.607535562673	539.891298819211	4823.69061180365	4859.08950651103	3346.84456162684
CP023154	331480	331634	+	77.4113973274592	529.133586599242	489.347284491353	1244.27518777515	1181.47114767548	907.017793656218
CP023154	332310	332477	-	1483.48882972667	1130.11631242274	1524.06152524209	731.829812961187	710.671946260495	843.740994692837
CP023154	335501	335651	-	1088.48327750047	295.51582994521	707.609240322806	1871.01807731238	2103.68065953115	2560.99519473331
CP023154	342280	342430	-	3808.09519266464	5065.63919320246	6349.36719849536	3109.18775357881	2591.71795991427	3644.45431497427
CP023154	345126	345281	-	26290.9833339303	11878.350303718	16246.6501375091	3026.65003037598	3432.71344788581	3135.92149131787
CP023154	346413	346563	+	165.661560269233	415.673588067173	376.789995146716	1632.66270989904	1560.14327990166	1266.37413644684
CP023154	347138	347290	+	1304.6899336374	2000.11592908296	1729.59460016838	2838.38586981594	2676.49002952198	3084.57313725018
CP023154	349923	350073	-	4639.82843687252	7082.07272120694	6465.8903785679	5925.19557792658	5619.72487962468	5555.17250094992
CP023154	351151	351301	-	2361.69343958422	1965.20881954149	1969.42736862274	8507.30702501203	9032.56399685498	7578.12072079171
CP023154	351694	351844	-	4703.39615583539	4408.26616813039	3414.32542377752	2641.93927906443	3336.80571476241	3413.31522933818
CP023154	353955	354105	+	5819.24718557973	3562.02619262726	5448.98223473349	5847.51497426104	6292.21552297876	4036.17542635151
CP023154	358171	358324	-	399.878439880877	658.468732499943	258.850004603832	1505.79572619708	1307.6673613112	1118.43716626323
CP023154	366618	366769	-	620.599143743539	476.358506281821	654.053017827927	628.442449746513	724.717449221009	742.053667987703
CP023154	367040	367192	+	1197.22004878887	582.452257392934	1203.70057262246	1114.1755832108	1018.06894823457	1304.64808891478
CP023154	371728	371886	-	663.047850225439	1080.48916862528	1141.5030149736	947.136222298367	977.051338087466	1109.10729357067
CP023154	373151	373301	-	1058.46374990305	2315.7674530835	1450.12289210564	1630.35764615899	1532.2781637843	1405.43958586864
CP023154	378523	378673	+	2765.62146842472	4321.82957659842	3774.92931211766	2789.07631323921	2734.48112462058	3246.3956029968
CP023154	379045	379195	+	9123.43047604161	9129.26674850338	7873.4384509059	2107.98856724647	2328.55164010819	3404.0163085673
CP023154	379601	379760	-	218.112100723007	401.07702770987	353.236562165003	2264.56246299372	2053.59431680872	1931.69507079802
CP023154	384337	384487	+	445.981079333275	382.682789539221	448.748920894864	2227.12398925581	2519.45235407623	1785.73076951109
CP023154	385327	385477	+	566.914447176577	1062.07765306459	891.888564933933	2219.94776007036	2090.54906716306	1736.83914390714
CP023154	385420	385614	-	1001.40131939387	1015.1634298248	1020.93127734298	1167.90970257657	1065.69726815519	898.529347445317
CP023154	391612	391796	-	50972.7497371148	61329.0438346811	44159.4505218535	3458.06867991887	3492.59644443391	3155.31257359796
CP023154	391999	392149	-	1537.38786766084	1637.94947134583	1747.70507851161	2792.64389795388	2799.53854499618	2919.01039805899
CP023154	393184	393335	+	68.7313011199811	351.576722300459	206.472667155808	3802.55391345393	3142.46881150072	2167.70569801247
CP023154	399342	399492	+	380.254249758507	556.670068073438	373.940269023149	1147.30135819059	1110.79278521178	999.719771025749
CP023154	401785	401937	+	1219.07249993119	1020.86827517762	1141.17121763832	1520.54550083161	1389.20966356788	1582.53730399521
CP023154	403842	403992	-	941.374448183408	1243.3314003905	1033.87016888376	2245.24677660241	2261.27283402282	2299.06356809872
CP023154	404932	405083	+	1181.03543985146	2442.78921126963	1624.66904630703	2293.37870493427	2173.43253403288	1621.56298918075
CP023154	405745	405895	-	1315.87106649789	3291.40151669196	2367.08242346627	2222.80910021214	2049.04827740143	2487.53919093088
CP023154	406959	407110	-	723.99652269741	982.335899835255	879.949911364007	1840.3114272163	1506.66932468754	1629.42644182507
CP023154	417390	417542	+	837.941483038587	561.732642724269	556.459097828557	635.104010621218	721.143306465459	750.069814171177
CP023154	418113	418264	-	594.402316324456	1267.75724162937	1341.63929016188	1338.0688919524	1317.77364418876	1164.38073493147
CP023154	423838	424124	+	423.27843107581	1080.45684584622	729.792177487102	2860.97141870328	2713.94880529583	2460.74921590373
CP023154	424667	424828	+	265.170535902621	430.043611502081	495.755663592133	951.088318195072	911.271772260486	788.753786575176
CP023154	429194	429349	+	290.595625138871	326.334833561963	374.271914705615	847.106541228425	796.272723003704	569.87815317751
CP023154	431564	431717	+	5900.9862867659	1418.2921415207	2467.71926906287	1227.04366139721	1138.8417159314	1058.99485896134
CP023154	441725	441887	+	1329.14682289389	1156.71744371063	1066.71506292478	3541.89853479058	3198.70521266582	2595.56473644018
CP023154	441910	442060	-	448.380182070811	404.992238405302	494.09665713561	567.126231208166	619.678218951935	712.625088003194
CP023154	447911	448062	-	407.57433266979	563.900085851689	579.970562806779	5365.55913700763	6051.64127230883	8850.14754330586
CP023154	448900	449053	-	5953.77897481035	3871.63024581481	5270.7375958424	10621.0578148653	10236.0652276312	15122.9286602606
CP023154	450816	450973	+	49.7432223150858	136.998903258494	137.581303514079	2066.03342919519	1872.27649389815	1125.73075987255
CP023154	455359	455510	-	431.917429243691	567.59568192541	615.889932734233	2795.66564494439	2917.67856607424	2484.27887843036
CP023154	460365	460515	-	7101.0857215872	4094.36486204061	5212.7802592967	3322.68603791745	3718.18731190639	4140.3712506389
CP023154	463469	463743	+	6595.57687580033	10479.4355798202	8830.35697849535	2657.79082148761	2387.22950177542	1897.56451267986
CP023154	466470	466621	-	3100.51889635303	4982.79365368531	4784.38838572166	3554.40707124616	2970.34536827033	2856.90172586769
CP023154	469451	469601	-	1117.79120570438	4033.13122457662	1852.34318210292	4125.38418409316	4742.16659548458	4223.40223695889
CP023154	479792	479943	-	11823.922847549	13999.5141004615	7826.36818540167	14177.4615228521	17762.2808896742	21943.9631898055
CP023154	500587	500783	+	27888.5844725698	26551.7092370798	25014.4987378815	7063.45445232504	7019.70517307947	8597.67747908789
CP023154	504253	504424	-	3894.82602051483	2651.05783592854	3209.03662098789	1604.43575282593	1887.94589287939	2028.14244028609
CP023154	504905	505055	-	6929.38416700651	5591.08268383101	5582.51335999988	4760.87575458336	5428.62599000667	5968.3322884202
CP023154	508495	508645	+	39838.9092689024	11375.7871886272	28359.6420402352	49559.0783583885	53873.9012430324	53117.3607562852
CP023154	510559	510709	-	242.536151765927	509.93214120872	474.984218526991	1468.47998792277	1422.43358796579	1223.19790831801
CP023154	512327	512490	-	190.754751592436	259.55206567995	290.386132963334	1180.71030505968	1193.54461768366	1873.39558749294
CP023154	514419	514577	+	6535.41180730057	10532.4913538771	7420.02382121075	1925.73671335997	1919.44831081502	2693.65981089855
CP023154	516120	516320	-	442.197310280261	438.198688965267	418.698794921739	3024.09749591838	3325.09254111035	4104.82824646561
CP023154	519154	519306	+	981.210300483015	1028.87763871151	721.164546976251	3496.44509036448	3477.05115849158	2140.99720300164
CP023154	522429	522586	-	177.812553355123	529.929604355351	483.790575577069	776.938220655566	864.716428974517	859.469896053494
CP023154	525542	525709	+	12734.7434208622	10206.8345428116	14800.4694036817	1337.60797187747	1478.21132523105	1679.76522997247
CP023154	526537	526687	-	888.584371108314	677.296706022542	1204.63772271913	1945.87096777814	1733.56336161846	2007.76707166696
CP023154	527326	527476	+	2882.13323760448	2854.68216770054	3975.77198410457	1680.24509636195	1575.83340852005	1653.39623771436
CP023154	533922	534073	+	3747.75762900144	2042.83068461693	2872.92264092853	8023.97482712108	9107.78896411065	7601.8824572142
CP023154	538318	538472	-	626.036779186818	651.123770240108	726.413520751364	1561.62462447178	1226.72794910815	1158.2467399747
CP023154	539056	539208	-	807.874427653035	1538.40588032531	1427.58349983679	1475.80921833614	1369.19576171379	876.360862060223
CP023154	545282	545432	+	882.685273989667	1315.54290762219	1237.91215509188	966.402135721818	836.169902992066	1017.62188157847
CP023154	545678	545828	+	709.732008405024	859.979706223347	557.422490182751	2575.21138415412	2194.55261108381	2201.02303703981
CP023154	547380	547539	-	12648.7047866106	24153.268269674	17630.469115338	5108.86887865727	5291.10410138943	7245.01573683202
CP023154	555922	556083	-	1460.94369476042	1081.55341112248	1288.52469926696	2039.73180005428	2750.1998547299	2495.10995059259
CP023154	560351	560586	-	3772.97545375735	4020.29205372525	3867.13108025639	1781.90176435845	1811.85895279905	2490.7224069891
CP023154	561487	561640	+	908.454666638931	1567.55737068508	1609.19279104197	3405.81557771423	3242.39061885369	3081.57902317091
CP023154	563333	563508	-	522.691869722656	2153.26089759987	1821.78452783525	3365.3372090762	3137.07429520673	2250.12211137894
CP023154	570208	570362	+	449.299508144988	614.458782205191	575.094102825602	612.415455953316	551.191870028555	495.869276642068
CP023154	571471	571621	-	835.19022444112	1253.52160795561	844.681930488962	569.653086479211	609.88515186818	701.929687112363
CP023154	573674	573842	+	2003.38950834689	1672.68505737232	2011.18461005776	1115.38751081628	1220.49751360489	992.874468226121
CP023154	574538	574720	-	1273.10255496466	802.90755915599	1177.73315000718	1174.36442577233	1162.13176632208	684.888128454726
CP023154	577540	577695	+	527.148009539049	552.106331229916	655.524771492012	950.301511039671	1050.12128915495	1199.41620266306
CP023154	585965	586116	+	1444.14651363448	1880.99146946641	1688.0246022415	1207.48745687925	1216.23605071834	1199.5071277983
CP023154	589049	589200	-	7327.78245894085	8168.75339044448	7237.95978735196	3948.17812235231	3515.97487407872	3997.34215586395
CP023154	590431	590581	-	8076.14310163198	4935.8228591785	4062.44842965642	2507.06625062031	2135.16740411694	1983.9526919382
CP023154	597374	597527	-	4353.60873677253	2242.20324554896	2647.83079586162	3435.8337856729	3092.4936275937	2462.03869356329
CP023154	605169	605333	+	1255.28809473595	1992.80377153397	1831.40522979967	2098.17504927314	2110.65076222904	1577.86567426815
CP023154	607020	607170	-	37706.0023044598	20760.4102088059	36288.4091583484	66551.0058409467	37768.0297413068	32655.163307149
CP023154	610945	611162	+	2175.94281847275	1407.60020314702	1498.00442155759	2110.65931285977	2030.26556791075	2323.76976917893
CP023154	613412	613564	+	1619.5642817464	1907.22354463781	1878.70878018152	2009.10705604433	1869.23450463383	1841.47407874966
CP023154	613659	613810	-	1990.83289676145	993.743104013752	1893.55209357176	939.41311022453	1066.19907509189	968.040418217957
CP023154	617375	617535	+	239.768061826364	430.011543441493	375.51934835174	2567.92949975103	2615.69738708731	2666.39110457349
CP023154	619204	619406	+	2712.52420505206	2254.26874884867	2225.85072222479	2731.68340655228	2750.38299202607	2811.35959051308
CP023154	621137	621295	+	2512.80126293154	1843.66153815077	1870.44636701273	868.391354457978	929.661153344889	1057.79053064197
CP023154	621725	621901	-	437.858306009063	519.777533917073	419.901459174706	1322.47726691332	1302.23620948343	1467.52643618373
CP023154	625551	625701	-	846.724870957131	576.176813603566	847.605801056663	1389.58368290449	1438.4460069339	1219.00616225622
CP023154	638155	638342	-	4795.26944884117	5153.75934261495	6763.74949771388	1544.98180832072	1751.77067573496	2230.65969680164
CP023154	640596	640750	+	6378.49492340592	3709.00865439403	5731.78463614598	2827.46421487377	2676.06723785991	2225.17646097872
CP023154	640944	641097	+	406.025286108635	445.425884647874	388.726175934712	3343.41034144712	3418.94453732501	3443.16701358442
CP023154	644565	644715	+	622.823324979115	726.206048707697	670.390068293194	3275.54369646462	3110.09615785538	2791.08625665179
CP023154	645547	645698	-	575.900157225679	1010.8472267241	1149.39495831365	1291.251616231	1207.85750625419	1270.64382394708
CP023154	648267	648441	+	1862.47012220178	884.139670472174	1099.64977299292	1111.27656594745	1314.40409881609	1049.403559557
CP023154	650571	650721	-	288.34050824421	1791.56907036796	1117.74022022206	2625.40156905033	2282.88608959894	1660.36580032313
CP023154	656792	657001	-	2569.46933015049	2747.88587804807	3139.44956192854	1623.92008413803	1567.42722220267	2185.20779973601
CP023154	657348	657507	-	1354.34295841998	1294.75284073262	1269.32507792848	914.029840908903	973.382756257387	941.975625912489
CP023154	661279	661461	+	1150.65544382925	936.777266903969	701.700363445228	3062.6969489486	3357.19395680327	2760.62121050299
CP023154	666535	666686	+	3587.14716945486	3326.82030685974	3367.60161754598	1882.66456575795	2618.70123510675	2167.19146459429
CP023154	667566	667716	+	3238.7025341669	1313.48825575189	2097.84000151806	1419.83393715424	1553.96782062933	1825.51178271058
CP023154	672926	673084	-	1374.68851416749	921.196191155174	1396.43833495541	734.039980236373	780.600349418651	704.440582708039
CP023154	678304	678457	+	73045.8388927613	44652.4601974942	45309.9794800251	326251.336099496	305705.648120109	142725.354737814
CP023154	693767	693967	-	5693.80937483365	3891.7855186463	4946.18688634697	1088.86726966192	1416.55575873935	1178.00417707901
CP023154	694263	694416	-	10945.8878888746	5309.85908712982	6396.92460810284	1057.36277753471	1370.66838955278	1603.16789601618
CP023154	694888	695038	-	7321.84486319095	32168.0599327657	26520.3619146356	1356.59801564478	1217.33923936867	1052.48558288537
CP023154	697184	697398	-	1282.63284308898	1575.7916175602	2005.81237862014	2775.12386790161	2480.70853215702	1635.34988182078
CP023154	700509	700662	+	11874.0513470206	7168.28642059138	7894.11209605433	3281.49383942568	5053.47010838103	3894.41668018972
CP023154	702717	702876	+	13020.1607139012	5624.29673143642	8912.76995151949	5628.82622429227	6076.16590952723	6613.52849143502
CP023154	703171	703321	+	11691.3868003947	4788.29760814957	6608.1409157245	27008.5181071827	27605.0586128967	24947.5348254286
CP023154	711933	712086	+	156.905910032302	146.747310142655	150.899471204054	1255.33274874694	1099.96471545245	758.781694338082
CP023154	714652	714802	-	14891.945220231	16969.35309522	24692.0077917836	7399.17459971194	7865.46589627534	9701.97899761901
CP023154	716898	717049	+	175.892295765862	434.885560885995	411.40866797437	1652.35273969299	1607.46756897287	1231.58664892994
CP023154	721517	721671	+	1194.39332012294	1068.93162158388	1139.42002338044	2930.19950301472	3172.99506498455	2777.25147641936
CP023154	728439	728689	+	7196.57400926826	7378.94822522543	7713.69201214004	4044.50675333006	3709.37948388461	4015.30370793227
CP023154	731094	731248	+	2418.00474574541	2571.1890622486	2732.59594028175	2095.37567762242	1997.79018024083	2112.05948465525
CP023154	733767	733920	-	3843.79543445171	1333.05005951163	1534.57428693312	1245.61453747762	1510.35567927678	1503.16499751926
CP023154	739632	739782	-	8567.28094179154	4394.99002926299	5045.11312763763	3755.32009951122	3368.12025653581	3521.78819799088
CP023154	744117	744268	+	104.4572816202	109.402910533624	160.082906461381	788.803626578382	708.467166958813	873.815434223648
CP023154	751819	751970	+	2562.27567268372	4743.07201709316	3187.93673724521	1289.39054344543	1490.51200082702	1421.2906799792
CP023154	754315	754480	+	5470.05563750045	4808.12951042191	4826.60006947644	5154.36266876998	5119.58457641345	6132.58822834624
CP023154	754480	754630	-	2063.92479247322	3097.65965432058	3106.5423575191	1221.6185461049	1289.63282321317	957.010110824945
CP023154	758485	758637	-	635.309561961395	936.736478333385	617.503976955232	2678.80741035541	2392.38911578334	2506.22080821261
CP023154	760102	760268	+	791.97023257253	898.303418548672	964.663388759123	1356.76159671627	1202.09664335782	1028.3949220248
CP023154	764093	764285	-	3974.76569479164	4574.24044757539	3675.38442525025	3886.24401328774	3733.28557778317	3775.01873052575
CP023154	765966	766122	+	763.451140902911	1439.32708488882	1093.22357639104	2688.25716931128	2476.76662717564	3075.65100977708
CP023154	771724	771886	-	810.586398455705	1393.20347131397	1340.31884396894	712.807080251063	742.108101497176	611.238700053964
CP023154	781521	781728	-	16024.6560668364	9629.51159349439	14592.4659178002	5492.58559789848	6371.35399992412	6507.47192889862
CP023154	782815	782972	+	1927.44975024535	2474.14284871785	1764.12606190069	1848.58960498757	1631.16715854701	1790.15023258325
CP023154	790775	790927	-	30259.3167847452	16329.3255287532	26894.6876359259	3280.86081116111	3474.84816946558	3737.24879845426
CP023154	793591	793741	-	3544.98098959103	2467.08250787826	2387.97257959086	2441.23503538638	2489.58037104795	2009.69539418115
CP023154	794322	794472	-	3647.4406687239	3871.71324394144	3364.46487393591	3846.14480949321	4969.99003521285	4658.90847290866
CP023154	795085	795235	+	562.179864121968	1597.33125494975	1148.05644697493	3584.88733029622	3362.05549212346	5275.99638744268
CP023154	796093	796244	+	11457.0901022008	3255.86143449019	3998.12198277868	1948.54179993041	2142.98113114155	1666.10355623271
CP023154	799522	799672	-	1187.44745227236	1295.35268325245	1245.97715590435	2259.22122508761	2235.00540835038	1607.48611036292
CP023154	811034	811343	-	359.387488199086	1152.45371573263	1132.98408856105	3124.60594425504	2930.1186919023	2695.20785099813
CP023154	812340	812498	+	1089.60096954378	1546.609978366	1249.58489326946	1790.19101659432	1784.71848535574	1679.66072523164
CP023154	813614	813838	+	1820.8041557629	2333.99103218912	2364.71631223279	1548.70770460009	1399.79697857919	1552.07244863383
CP023154	816212	816362	-	202.362546470102	350.29566041903	424.50837488143	1346.80701152224	1317.04684646514	1380.71837483607
CP023154	819045	819195	+	1478.70383625564	2340.44674284556	1148.72779173059	5775.78597731825	5773.95170255639	7021.65726538655
CP023154	824149	824310	+	11136.5220273169	10151.291742015	8039.12322326588	3901.1194954139	3813.34586047694	4616.13400450548
CP023154	824946	825096	+	10486.059226178	8648.208447488	8814.25453651657	5926.27721750194	6708.96230840447	8920.13386385877
CP023154	827011	827162	-	1966.14178741303	3625.58364496602	2941.08962814446	1161.68983957518	1269.02973930819	1858.51673951293
CP023154	837296	837456	-	6770.84432665883	4565.33771253947	5325.41360115165	15059.7857204825	13027.20930369	5521.77630901171
CP023154	837641	837792	-	11009.3423689143	9501.70227011916	8625.49029833739	10379.3932838558	12231.4255930319	9829.37896736456
CP023154	840587	840741	+	969.743246191346	598.760669836183	657.88394332199	2555.01553214602	2505.257613198	3337.00552721625
CP023154	843855	844005	-	535.611173300593	410.709892169059	341.90396087698	1670.53074041763	1571.78943964931	1720.15455814311
CP023154	847212	847457	+	10896.8467049792	11765.395333701	8622.31873654612	8303.58269940124	7755.52791004281	6545.76201549615
CP023154	849959	850175	+	11208.6967523809	4567.03426509583	9303.80042933584	21842.9185833138	22125.0549450042	15884.2328381827
CP023154	852576	852726	-	88594.138427796	103605.155938349	83680.5000554822	16867.9571698311	21239.4750812727	29027.0091893319
CP023154	859304	859462	-	1320.91019934054	1068.82232557814	1504.58888691244	1509.99844567685	1574.19310885719	1715.75002797829
CP023154	860017	860273	+	3251.43067996593	3690.4150807831	4244.30422525867	2979.16568731011	2919.058103014	2771.75909828588
CP023154	863220	863370	+	2267.82655349788	2674.55056835403	2101.50837247537	1976.54385975074	2021.52862511367	1908.04258630316
CP023154	872336	872489	-	365.999891747138	604.415004296481	479.522062092018	1861.74112988075	1531.56259476399	1460.12095857712
CP023154	873664	873814	-	2602.05063778237	3090.62940483373	1702.74628834672	1214.81944808178	1276.84688310789	1158.62568190195
CP023154	875762	875916	+	3595.96087185406	9408.98798015699	8326.53686136004	2597.95954507478	2124.58131197533	2260.72857469112
CP023154	876865	877015	-	862.352334723489	552.730233997263	633.416247229274	2037.59816858092	1956.10098491188	2085.37489443484
CP023154	881898	882051	-	293.804481986811	576.451698727191	718.702735983156	788.242839874497	756.137467331702	811.140578600755
CP023154	886702	886870	+	3415.56518444755	3163.83616162124	2423.1015261115	1395.77185883099	1534.1856059458	1376.79043610446
CP023154	890727	890880	-	778.144312904749	1682.33891427478	1183.48694371648	7877.59693029253	7080.93922281574	5951.11342209238
CP023154	894362	894512	+	3366.23773985948	1766.7635628007	1908.6621701409	4883.96005940566	5208.76208421702	3909.20989411455
CP023154	895069	895219	+	2299.5743917057	3186.78065095494	3587.78045867531	1597.29353365713	1574.47375933237	1278.27304691357
CP023154	900718	900869	-	2956.7789214103	8237.17685715828	4011.72064369067	1268.85943024326	1359.66367732145	1716.50993911461
CP023154	903676	903826	+	1108.55154561724	2151.53316861407	1452.00161596432	4400.76953836783	4520.58743391692	4836.18575101532
CP023154	907612	907762	-	13181.1301588507	4276.35605527159	7096.07630733443	16949.6781791956	17594.4676674416	16836.6697189047
CP023154	909866	910016	-	19516.0115510051	16636.9086693219	16997.0029721193	2246.76176868347	2408.11979977064	2513.40265556115
CP023154	912987	913141	-	9460.35266107891	10960.6659727959	7091.70544323421	3479.74521696588	3612.56124531004	3538.40949847391
CP023154	920122	920272	-	3028.07593023119	3132.58529316826	3256.29073989122	960.738787454175	1026.12294747954	1196.30448488221
CP023154	920255	920407	+	1439.13413700697	3366.92683398749	2355.20928802421	2221.06074836778	1962.80866258437	1875.13671715777
CP023154	923173	923323	-	908.088207924927	1280.22624149136	1250.35598042159	1938.36677373605	1904.38854242934	1767.92485632959
CP023154	930262	930413	-	340.340187746165	2061.00329790527	1242.96087202741	3558.4779751907	3957.10668029014	3442.05454550421
CP023154	932799	932951	-	21688.1247911717	22437.4600796553	20868.4426683971	2076.63849789992	1922.28216559912	2154.58097296919
CP023154	933921	934071	-	4207.54130287762	6656.25476757469	3550.53470104808	4597.26198302751	4940.26445937758	5023.68658394319
CP023154	935991	936147	-	2267.80912417197	4626.75260490119	2426.57292418897	2118.49471158909	2328.40530597773	3010.55578179299
CP023154	936683	936833	+	2900.64379031935	3434.57366197373	1926.48100295228	2345.22768197686	2255.92486525406	2287.571199053
CP023154	940237	940393	+	258.816441815488	587.453554064733	366.96080260123	1147.31211590941	1097.98923209035	1345.24033532692
CP023154	942303	942454	+	245.946721554452	934.316715899564	367.158402673245	1680.63972724024	1613.63410591928	1403.95869237512
CP023154	948758	948916	+	211.089869666795	576.504275217439	398.53602371763	2946.49556845971	2913.87748344028	2584.03933871851
CP023154	952664	952815	+	271.369826515578	377.586868048127	451.805503133568	956.595149037435	875.06975511838	1012.45278398749
CP023154	956945	957147	+	888.218848992159	1517.64900637577	1597.20200127866	3351.85214654813	2676.12835330939	2775.50395517354
CP023154	957500	957651	-	52.6846326213558	87.2607854799463	200.124538163044	1484.79113429965	1426.73902979315	1494.95241025347
CP023154	959542	959693	-	2618.94366838318	3069.7850186317	2860.00120079444	7302.68800480064	6777.57330914406	7592.85388624395
CP023154	961982	962134	+	1028.56447347638	1181.81177791391	1169.52483566734	5288.42611694339	4974.86480717179	4883.63448272756
CP023154	962899	963051	-	1242.76899234228	1335.42039639893	1183.62215391101	1680.98675761489	1544.16124960281	1933.78660495772
CP023154	969200	969356	-	101.699496200964	605.621396810036	262.217950628071	4291.01813944562	3542.87633641154	3240.9074277913
CP023154	969754	969931	-	7459.17104489834	8448.32552102671	8821.42016364997	2811.29725167057	2616.39433706884	3192.1126031986
CP023154	970017	970167	+	3383.81041247093	4929.30052941193	3601.43958340524	3977.47998318946	3452.86710597729	3212.05707694889
CP023154	971463	971613	-	2448.3472197173	2092.70144519453	2636.67554343967	2080.93794532847	1860.06130355879	1965.02271572132
CP023154	973709	973859	+	880.576302497276	1019.36711787419	1143.66540365835	4198.77653026147	4040.55048260732	3063.08079324831
CP023154	974005	974160	-	3126.52166005249	2333.96476655884	1515.44500998158	4162.15502571748	3664.47316133073	4363.27554413127
CP023154	974010	974176	+	1638.48177815424	4269.18421159537	3780.54709569291	6883.51769794451	5894.31691469368	5611.27874742171
CP023154	975866	976020	-	2164.13809645534	3169.50764886281	2291.89833389831	3175.60876254704	3246.5729016186	3162.94755700525
CP023154	978776	978928	+	11876.7214766024	6990.77805440425	6622.45947585289	2539.27861139587	2940.94337030074	4070.33200193304
CP023154	979586	979736	-	1142.47490245298	2620.16167049526	2162.03579833319	4845.7255608985	4236.33063498583	4480.52435572456
CP023154	979674	979824	+	4447.05482504302	2962.76294486836	2774.38733652223	3537.07167396031	3476.69724692187	4367.55458882103
CP023154	982950	983100	+	1845.02676912142	1928.54582794102	2428.42215394142	2749.1954422157	2916.39201801626	2540.97062756288
CP023154	983433	983584	-	2857.85425354606	6186.21967767204	3946.18449191176	1184.65663802275	1169.73658324892	664.838118244948
CP023154	984010	984170	-	9851.43760008089	45731.2926520401	23793.274175693	2247.57706919802	1590.49205082184	1462.14495459966
CP023154	990190	990358	+	36429.8396532549	11279.3897170955	19445.1264880777	3027.03118300049	3736.93319200727	3420.73608760651
CP023154	992750	992904	-	1388.40777382611	3208.50279909299	2491.89810733017	2846.93399521901	2824.237556272	3695.42154365373
CP023154	993465	993618	+	15184.5525477291	6036.17499700244	7393.47792762955	9074.34205467853	10086.5077132551	9509.62103428515
CP023154	995044	995216	-	67.2285483416757	971.085602771593	251.733524978525	1721.98267295996	1557.41973605297	1486.26660785201
CP023154	998612	998762	+	79896.4126654228	92459.8571734593	76201.5355943074	38318.9984399037	41314.5268250145	31745.8193780137
CP023154	1001375	1001525	-	883.036566414989	866.640562465262	944.873479574795	623.904540474963	636.542428031756	681.694657195732
CP023154	1007418	1007577	+	1216.37117396898	1480.29033154748	937.32798724461	3895.54733725675	4389.27015514099	4423.77980150985
CP023154	1013134	1013306	+	8713.80047745594	9310.23405101841	9076.21354269539	6997.13731669521	8097.47805366909	9302.4632846573
CP023154	1017450	1017641	-	6229.80404970549	4768.8618573091	4120.78365827671	2907.1905409046	2852.84812878248	2397.75201214189
CP023154	1019620	1019772	-	2119.01630882787	3460.37803094721	2803.98446922162	1795.23514770983	1914.19755746284	1981.08178525536
CP023154	1023043	1023194	-	17100.707914589	9822.66221154209	9219.31746779749	1560.88050124429	1466.40163941016	2203.18840217288
CP023154	1029328	1029478	+	9140.28012072967	4151.8367461038	3870.46539356913	4301.2095000818	4353.64479168402	3861.38853530345
CP023154	1032757	1032937	+	3311.01076125569	2581.98916037088	2260.83303280032	3388.99047212615	3643.55720097424	4483.0234790791
CP023154	1034574	1034728	-	7804.36673414964	7638.16218611096	6972.91986565829	1844.35633446819	1673.80916998055	1680.659335293
CP023154	1040019	1040169	+	13220.3657982458	17934.2551432422	12693.6036368326	5977.43739766944	6025.47266935567	8082.204569789
CP023154	1041501	1041651	+	23198.1064635271	9785.53202027706	13082.1613162385	5213.98166758741	5485.2780394933	6894.92734395803
CP023154	1041785	1041936	-	13192.9890429967	5566.07480195912	8936.63451452107	1613.13599633778	1795.03161254425	2388.49388602799
CP023154	1048248	1048400	-	22044.9529355491	7571.89524301348	9801.78786771026	331143.966179173	218968.340042862	152569.580829107
CP023154	1062380	1062547	+	684.861082078724	1593.49508208351	1635.81195601211	1362.5976182078	1201.25176758821	1133.89432579676
CP023154	1063433	1063595	+	1420.81990787753	2594.46543256653	2354.5492893099	1648.8424800256	1431.48970230854	1343.31054787748
CP023154	1064691	1064935	-	6589.16224116735	11627.9488685033	7034.00498390977	23256.2028545667	18913.5203930725	20407.8698517438
CP023154	1068936	1069086	+	640.849713287902	541.39540356672	800.633800008926	1966.30161741035	2364.79199888035	3463.46282375098
CP023154	1071324	1071474	-	1687.39041095421	1965.27857100737	2306.70671734047	3513.22245048493	3840.37168455606	3254.40807686512
CP023154	1074477	1074627	-	68152.2300914173	42405.7244241671	47708.6092480063	8470.61146024861	7415.2289402594	6220.81106495403
CP023154	1074880	1075034	-	347330.113419122	110296.955937236	153379.076103129	39742.9766256593	31678.0449666254	20689.4576470449
CP023154	1079301	1079495	+	22102.4945554726	33762.3565419276	31221.1501759101	2794.97418322458	3032.11766033452	3380.82012403829
CP023154	1079749	1079900	+	10138.1330424775	21248.6965229081	18040.5577173127	3819.80749262194	3237.96543254292	3518.60754961193
CP023154	1089397	1089674	+	517.884154876543	1213.61547172912	868.357973800179	2064.70091104797	1821.31165861639	1200.04396883446
CP023154	1092840	1093050	-	1357.99248616687	1379.47487686251	1655.63655295014	1619.745217643	1616.82644959723	1562.03864594814
CP023154	1094536	1094686	+	173.513666672547	286.848421900846	303.108927140169	1274.06983020694	1155.25347365134	1366.34681821322
CP023154	1100896	1101060	+	2956.53213938176	2279.82298628197	2027.24227617229	903.267394021616	934.698069138367	738.726800557455
CP023154	1102328	1102479	+	3892.9507275591	2897.52824620084	3678.66881282023	2298.00115034366	2202.60949779129	2225.7305805663
CP023154	1102523	1102673	-	740.5814769454	1674.59169836738	1223.03989996156	2566.62962148299	2308.26831603046	2894.60708087905
CP023154	1108971	1109122	-	1082.48033293562	1907.68246109347	1272.03245562477	5425.56115118274	5035.11197893385	5310.64313259703
CP023154	1110517	1110675	+	1419.21049324495	1273.92682302383	1820.14096349894	1399.45127793306	1344.82551978521	1341.19566919196
CP023154	1114936	1115087	+	7312.00971341397	4604.03915162334	5717.24665933503	1768.84879174342	2044.37578793021	2142.66081489498
CP023154	1119730	1119885	-	17285.4607599411	18639.1744481593	24090.9553568353	4700.35755470102	4909.06381649584	6750.64089809705
CP023154	1121833	1122012	-	805.376708703522	718.838406493559	628.421648316809	2782.18513450403	2471.00251416773	2680.96927907562
CP023154	1123100	1123261	+	955.928546577429	1475.43370651908	968.513279082895	3265.86115427818	3599.26313822739	4184.61580248784
CP023154	1124757	1124907	-	3501.48527377055	2920.6469349223	3847.96301102199	1884.2243489148	1861.58634613061	3006.84682626259
CP023154	1129234	1129407	+	19974.3589401878	10864.0212214672	15786.3225765986	1585.00349475945	1549.01293578123	1540.41788507815
CP023154	1129901	1130053	+	15585.9852529842	16162.8862531289	12061.7934191567	1918.78685505594	2192.70972562291	2562.22433662838
CP023154	1130521	1130679	+	13999.120850208	22526.507329305	27961.4072298596	2634.50197349193	2741.38381052087	2486.44792766838
CP023154	1131093	1131247	-	2690.12887044448	1285.08286156263	2305.36653422092	854.709325332211	834.174247195053	1057.75418529759
CP023154	1134756	1134906	+	5100.64981749721	2306.67712054888	2884.89658325801	1320.36796078562	1545.41157080446	2250.95689514023
CP023154	1138948	1139099	-	6201.27208241523	8253.90767301472	7372.37156180925	23218.838832882	22175.1957138388	36950.7657078364
CP023154	1139749	1139900	+	310.577709162478	211.599948768177	335.170853408267	733.238043670424	811.542144895935	815.501567861055
CP023154	1141034	1141218	+	2040.50707645149	2916.15917758924	1809.046084457	2012.24423931123	1860.4746811321	2215.95135488497
CP023154	1143572	1143804	+	1017.48554327749	2208.11483144887	1617.15762211269	5285.89192418592	4730.44335223905	3883.88570129023
CP023154	1156612	1156765	+	1443.86504272073	1362.86897389595	1780.357322636	2483.78914577018	2166.28024513261	1948.01322819528
CP023154	1157144	1157294	-	1880.31187661378	4466.30605011187	3222.67608288761	1059.20780368018	1261.72338582183	1436.51989019863
CP023154	1157503	1157683	+	1463.43637833655	1369.5317709288	1440.53018254476	2139.60680436595	2157.36541071971	2271.83919238505
CP023154	1158967	1159241	+	3404.28150230838	1740.41084144358	2897.89697961404	4063.63441018011	4286.26045898722	3505.99898849421
CP023154	1161081	1161231	-	623.484078350745	698.016321467573	458.579795492771	2400.30344737462	1795.25999336283	1323.609234525
CP023154	1164306	1164462	+	9088.44138594145	4114.21570607912	3684.28964519971	4715.56746770687	4746.1249330473	4997.73824170657
CP023154	1170349	1170610	-	2614.80787850014	2299.83696413106	2865.39023254627	3901.6723415722	3821.82276652042	3495.79282345367
CP023154	1172798	1172948	+	8628.00311767979	5786.70233835073	9133.77696922302	2918.26317318935	3659.72239683619	3797.35778948546
CP023154	1173249	1173399	+	13797.4463502342	5650.22350961604	4829.35334004895	3093.68533038479	4131.74727315878	5007.33395111736
CP023154	1176028	1176179	-	1868.92919042634	1996.54476154034	2075.79483163872	1996.23350785308	2060.4662979085	1966.06393627972
CP023154	1178743	1178903	-	535.853640992091	1086.59571572538	590.518982009606	2705.10669429553	2704.68398632699	3057.83651669338
CP023154	1179804	1179968	+	730.266804333437	844.170243216819	573.971354564346	1297.0640556076	1303.20077869476	1524.13207662087
CP023154	1180353	1180534	+	13225.5318423153	12627.6587568817	11173.7716434129	8644.63241242476	7374.29178080242	5712.91510286927
CP023154	1185885	1186079	+	1296.30965856142	1195.24571922406	866.067821600345	5099.44241374823	6136.12599972521	7475.4877752668
CP023154	1185976	1186126	-	8867.15885441718	6605.57531075885	9266.15054848712	4634.68059033734	4445.5996273147	3495.62826645004
CP023154	1186829	1186980	-	3324.19937391341	2388.63021331746	3133.0511693156	1911.06098403519	2019.32326944266	2180.96365391706
CP023154	1190650	1190802	+	1016.20596327431	1198.72449571139	1327.4492250032	2775.64816086386	2841.96391863068	3735.65291514948
CP023154	1193635	1193785	-	29146.3388900725	18260.8672847011	23462.0757730167	27074.574149844	30382.9473560747	29362.3090495084
CP023154	1194118	1194270	+	15371.7335752756	9489.3217016901	12235.1504734409	7803.65642549318	7424.44772031254	5086.68627738817
CP023154	1194762	1194934	-	49168.3515560002	23115.1500308538	45573.4300816567	18423.7659098034	23196.0569746816	21868.298731624
CP023154	1200587	1200742	+	942.196825823494	613.913453318775	936.658341025364	722.797365077623	802.074335904503	802.662665424679
CP023154	1205672	1205871	+	6790.0891528276	12521.0421566792	6686.61766399753	1870.37314773849	1790.91735660156	2132.02335395096
CP023154	1206625	1206775	+	10362.531066043	3134.36549699791	7961.06101010643	1282.98083746939	1479.73803333257	4289.83447687779
CP023154	1206632	1206783	-	1450.5538107174	2401.52795735928	1003.77565195412	6854.2444426507	7292.59328661863	6382.27406288343
CP023154	1212806	1212956	-	3381.84665730501	2827.24455493547	2149.13478837259	1921.4552055495	2263.79221548709	2465.78875376989
CP023154	1221623	1221779	+	683.216547551462	578.975722566461	571.231369512322	565.251938320628	581.271123441029	523.85687805155
CP023154	1222662	1222812	+	98.1151740461099	163.774594481624	214.536490531475	529.530139627181	560.175465323781	648.56557105164
CP023154	1223745	1223912	-	1877.372459416	1002.36995037159	1684.03596237127	953.08138115794	877.33388605363	885.628358771169
CP023154	1229344	1229497	+	562.91781547006	627.657771474297	809.122475981258	1393.29661059992	1610.26733237404	1176.98037989774
CP023154	1230216	1230366	-	1101.09740868578	710.580692057831	916.557109789683	3546.86828445415	3282.51290190463	3095.11265497158
CP023154	1230804	1230960	-	1053.71919076212	3294.83305263456	2852.90640721755	1188.04279969891	1326.0067763612	1162.06331584832
CP023154	1237077	1237233	-	5279.63028743517	2830.06279960472	4748.91677937501	1657.30109110259	1630.58115244886	1744.44149453364
CP023154	1237100	1237259	+	799.923991701356	3522.57366814464	1123.24588875405	1214.33293505478	983.032815817184	1329.58265244598
CP023154	1242540	1242691	-	754.12701783764	2073.12047255815	1274.16560445417	9378.11582688974	9155.09210781943	12775.8583462723
CP023154	1243920	1244070	-	2376.2811879903	3769.3571589075	3133.83443690508	11786.5398177386	10917.4266827164	6720.92189225431
CP023154	1245743	1245894	-	3390.15203737999	2426.88512864996	2470.65736788622	8514.71311026153	9126.72717992766	9863.30941845315
CP023154	1249522	1249686	-	22707.4476266195	10362.1221898438	17187.409863196	8777.63834477734	9932.52684839332	8719.19592504233
CP023154	1250842	1251043	+	2040.31089637667	1331.45613048418	1759.03814079846	2547.18577645346	2616.32237933219	2101.10783575499
CP023154	1252113	1252267	-	3303.03316947743	1729.97451067195	1900.59375599099	1838.09727342002	2037.96276679167	1801.72989393131
CP023154	1255218	1255368	+	754.260400479469	971.274331161856	985.954935208482	1340.00770310381	1226.40356728653	1300.44405071769
CP023154	1256260	1256410	+	207.359512684701	552.656512923761	440.642946326451	1587.73230668235	1433.77976454519	1457.7516068512
CP023154	1266795	1266945	-	603.570179519474	2152.24999940905	1265.7091960033	1182.24168344483	1475.42417018407	1758.61192451744
CP023154	1268606	1268757	+	46987.3430911569	34031.1428578654	49195.7640542461	17125.3276359588	21459.4005206894	24433.636364443
CP023154	1269133	1269283	+	46782.5414248607	27382.2023384694	46618.3229318714	14178.189886443	12629.1014797571	15208.2892531315
CP023154	1272335	1272535	-	4278.30853942915	2908.57777164972	3918.57936124467	4040.32075919342	3947.2615844499	3388.11420799555
CP023154	1274575	1274725	+	137636.960624043	60030.739316893	95004.0494304771	15669.654098743	22286.3422872481	24512.1478624333
CP023154	1275288	1275438	-	10185.5815056618	10693.1162313627	11931.8805584952	8062.34795023532	7777.64656992023	8658.66892244463
CP023154	1283683	1283834	+	4129.76384402037	5211.15456548314	3676.8474905494	3649.05457906152	3749.72319157633	3608.99758835055
CP023154	1283838	1283989	-	2682.85136392846	3090.49428393927	2402.01993730141	3485.50868918935	2977.57081449131	3126.57472932886
CP023154	1285534	1285687	-	83.8784359271793	348.720664176416	583.982847996933	1447.69270802045	1260.8942169873	839.033837128852
CP023154	1289823	1289975	-	957.271142656364	1708.22922634251	1467.84986726527	2530.53303277594	2380.57989013638	2514.93933387267
CP023154	1290965	1291115	+	18587.2732709498	13158.9013706856	12230.2399881516	1871.86086223326	2005.57285974693	2107.30091449421
CP023154	1291421	1291571	-	3145.05690608602	5151.30185289627	3290.06131389039	7686.71761469529	6433.13265964087	6250.97364699248
CP023154	1291471	1291625	+	6867.99172460833	5520.89210780511	6665.64356463044	3915.73573691871	3434.29535743314	3430.86916965419
CP023154	1296406	1296556	+	318032.583434825	280404.62996783	245846.591398624	11110.8822448284	13023.6572742082	14655.0925861589
CP023154	1297705	1297900	+	493921.309536411	315564.768299248	397860.034941897	66093.163203837	68198.6726026898	75601.5734436436
CP023154	1304968	1305121	-	499.295343213372	1235.47171487036	925.994233083988	2563.71910700331	2383.55285793987	2515.45852249319
CP023154	1308046	1308196	+	18522.5388894095	11907.6430732839	10757.2830427689	27946.2643888285	32437.3114271016	25781.7282409639
CP023154	1310949	1311102	-	1795.8084070903	880.992696448799	920.737555562523	1622.6627758979	1493.72679287531	1440.01167278917
CP023154	1317976	1318128	-	359.356804236465	836.961128380844	657.579140122644	1796.4788707317	1743.41674075323	1594.48588058213
CP023154	1319480	1319630	-	2648.87037736998	1583.85654768392	1924.42961852982	1621.45616595914	1760.92303308532	1621.42119773523
CP023154	1328184	1328359	+	11192.2308645593	8740.61895650875	9285.83530680226	4253.54714494734	5028.22654104563	5754.80930427693
CP023154	1330245	1330401	-	1915.88339086072	2204.45639671463	2405.43153514245	2120.30853460685	2651.03447606551	4471.43861826795
CP023154	1332060	1332300	-	6178.77274766554	4377.04946101551	4656.91408200151	6366.56353757564	6745.84483244969	5948.30848079894
CP023154	1333808	1333958	+	466.684314506957	608.633378523797	522.627520541812	2479.62692517274	2322.03607822649	1884.00000380885
CP023154	1338713	1338863	-	1306.15825448884	980.372919744168	1186.79760719539	918.722553498006	981.440105306349	1358.80221015613
CP023154	1343885	1344035	+	6248.13172344867	4207.25686373815	3651.21541824135	2053.9010756111	2272.49797660934	2484.87264816698
CP023154	1345100	1345256	-	1903.37625163323	2577.92169205201	3162.25428189559	1999.65189729958	1750.66616654597	2099.61783114496
CP023154	1345322	1345582	+	6139.7530191121	5123.08240578922	7162.86503660212	3390.12894938756	3197.66404926061	3639.60399832012
CP023154	1346439	1346620	-	2902.86792091417	3154.8619876652	4070.24278959836	2328.47081417617	2290.27896768223	2561.14666709338
CP023154	1350152	1350302	-	463.591198725336	857.200374439451	574.765695598968	1418.87675648934	1356.09850103596	1719.39808424086
CP023154	1352283	1352439	+	3765.32005909779	4446.21157362117	3273.03259950803	3326.20684023901	2735.23419023225	3134.52495535363
CP023154	1354268	1354419	+	2135.39609125078	2082.44548820308	1599.13992434123	5884.97167489244	5545.7094959328	6459.84130619365
CP023154	1361569	1361719	-	4383.75685186018	18554.0185814404	12927.5846898019	3569.39030139031	3377.33484380785	3725.36915508808
CP023154	1363322	1363472	+	10584.1744002241	6685.18796085408	9946.27686953371	2439.86383286874	2235.94308913825	2894.20793337268
CP023154	1364372	1364523	+	1972.39925882848	1668.39438563777	2369.22701562844	1464.37926005588	1512.40474220803	1478.74493851232
CP023154	1369010	1369160	+	1507.51336851972	1442.94483642257	1413.54008552514	4761.0797171654	4880.3095615143	2891.57064867417
CP023154	1374493	1374643	+	4623.67757692293	4922.33642303104	4952.59770695001	4219.37883213975	3971.98849360649	5116.91477451705
CP023154	1375369	1375519	-	2514.23329848832	3660.81605102838	1931.76064398351	10657.2359653834	8451.30084963	6397.67625710566
CP023154	1376808	1376979	+	5374.95284951871	5212.50003685294	5392.19727668973	5200.1708832453	6590.67177852942	9984.70194292739
CP023154	1381923	1382073	+	1609.93421664554	5067.30825921648	4128.78168772844	8365.0227883094	7302.04196762049	11614.0095513031
CP023154	1387568	1387718	-	80.3609285464675	292.481766580315	164.26822408515	2317.00045570545	2120.67659029928	1763.29074733784
CP023154	1389630	1389780	+	5482.18534982639	2845.58357911822	3560.39282158618	3575.0763664095	4269.97827390615	8911.72417276065
CP023154	1400400	1400573	+	5379.76871677881	3877.54043057478	5363.77292878154	1319.86535474841	1264.31498588155	1433.29639972613
CP023154	1402963	1403113	-	424.383555900482	493.306085214726	735.521650926478	1849.89918372906	1600.09298058275	1238.75544226024
CP023154	1406786	1406949	+	243.08306081013	1100.03560626488	763.946099338124	1609.53928616536	1459.18300589588	1447.18067346034
CP023154	1408602	1408752	-	11669.296431934	9618.03525936124	6649.16021614292	15207.1210221645	15732.2789757794	19799.904019095
CP023154	1409335	1409500	-	25727.4060404152	26259.0072331332	21747.675903484	4273.66854582432	4590.78846674748	4513.51513580496
CP023154	1415548	1415701	+	10195.2843634341	11907.5957541037	10802.5295401618	2969.26340323064	3683.54736046935	3530.48543843616
CP023154	1416036	1416186	+	25238.1055967788	13366.2505368055	12000.7247937351	5095.41113607394	6083.48879749615	8912.55088434159
CP023154	1416259	1416556	-	40750.2576820206	17399.2007080743	23642.1462886633	6151.41833095788	6122.44236254341	7109.0008670196
CP023154	1417591	1417741	-	5238.28006279885	6196.59282719923	6436.77256427165	2796.24089466462	2853.20571763052	3941.38535668184
CP023154	1423822	1423972	+	14477.2519628863	11569.1411448631	13857.8889274095	2835.47128556866	2923.17723160977	3922.79392156642
CP023154	1424245	1424395	-	13600.6442182645	8642.64327086722	9543.31780600494	4967.42980919391	4552.83379553153	5891.74090770339
CP023154	1426482	1426632	+	1450.50262823242	5737.30800339131	2567.580301025	2356.46928487797	2181.35084066407	3357.70065128318
CP023154	1427432	1427582	-	1247.65413478592	3039.64828359278	2366.59811688893	3008.90794320056	2746.08555933584	3317.58517703845
CP023154	1427842	1427992	-	8749.65314054904	9707.11776539076	11732.3817213074	2238.03315394534	2287.3288349606	1794.14880964552
CP023154	1431508	1431665	+	3374.94744739145	1184.22374026174	2006.56265653817	1709.29369938103	1703.44935711078	1815.33389086344
CP023154	1435572	1435731	-	3457.78672703919	8183.3399055648	6839.99248033436	1753.15518152429	1781.58736844702	1086.50247289814
CP023154	1436599	1436749	-	1986.10997601206	2304.28808243525	1544.31468405943	1994.0671951902	2222.8925273902	1785.08050459325
CP023154	1437104	1437254	-	10025.6666939337	3951.80152616905	5959.63503384731	2631.56619069077	2471.98288811823	1966.90093006956
CP023154	1439683	1439833	-	30494.3771063763	6261.9908142533	8998.41556482681	5302.61601016759	5141.53703075013	4095.46340304883
CP023154	1447615	1447765	-	3801.96299428676	2679.53433749102	2715.94067800485	1915.22919530283	2012.73401416093	2693.90438176302
CP023154	1450688	1450838	-	6560.16062800837	8232.66235649769	6639.88539457078	8960.48798334766	7813.45347786017	8094.47053735665
CP023154	1452132	1452285	+	1014.23106817599	839.182665715766	682.388442469123	5119.45681367823	4827.27608651221	4780.03089820117
CP023154	1454868	1455018	+	2110.50755787636	4271.54202000314	3630.71534109521	3481.80184202536	3510.50792195122	5142.71153523732
CP023154	1456283	1456433	-	1464.30230078304	2990.1842780554	1620.95326419187	4275.34815135398	4007.81386881566	3853.34258223676
CP023154	1457161	1457311	-	4756.5489685234	6165.94754203859	5830.05710779296	1751.48426738881	1702.3122148762	2013.12338043632
CP023154	1464396	1464546	-	1423.27652068654	1522.54114955532	1991.01172309367	1599.59421091247	1460.09854320203	1440.9423487016
CP023154	1466221	1466379	-	2475.93865271739	4220.59476966036	3361.3155984214	3308.01561515677	3402.58691190242	3100.35008775898
CP023154	1469128	1469279	+	3904.94255170847	2519.65904298997	2371.78356463363	2459.69205252502	2794.86228778193	2928.79960393351
CP023154	1470538	1470688	-	8544.24947840795	4951.69370299921	6988.91973507844	2513.34550062469	2551.96575291272	2631.61785950544
CP023154	1470733	1470883	+	1112.9965353823	4878.41034970488	2022.80494654516	4725.60246340809	4064.21769287821	4724.21033721122
CP023154	1476462	1476612	+	5878.59197386257	5258.27196004343	6763.14299541457	6974.48176267162	6185.33847164409	4299.39188199782
CP023154	1477052	1477256	-	12353.9599449439	13119.9635799756	16546.1729734578	8713.4153401198	9398.50383497371	13225.6819805904
CP023154	1482846	1483001	-	5387.44490244421	6335.22514369806	7361.80478174966	1662.32192215813	1432.41883802626	1045.25024207867
CP023154	1486397	1486547	+	3652.17800565893	10870.6928186653	5291.41339297922	6283.81611433005	6359.2066073304	8425.03343496765
CP023154	1490263	1490459	-	6467.25169215034	6248.74438605353	5306.43793723437	2075.49044357388	2281.67537123725	2896.28166220041
CP023154	1491422	1491575	+	753.410302367976	1029.25381534866	1226.49516719862	1261.25743017611	1354.31575922174	1637.27785125057
CP023154	1492887	1493040	+	2361.50227957066	1208.14761561485	1447.35151476137	1768.53400456962	1867.00970240042	2100.98838251967
CP023154	1493663	1493815	+	600.071280109343	983.312720939433	998.452192270691	1192.19406774133	1223.10837145442	1578.77191128366
CP023154	1498102	1498382	-	2587.3669099139	3629.70855426576	3144.51913812752	8493.74279034078	8598.71793893321	6436.23903769128
CP023154	1499054	1499204	-	563.796524310081	493.837887901051	655.947664010109	1819.19849808581	1923.16677884846	1727.86093920009
CP023154	1499971	1500121	+	3274.59393378892	2101.77396251418	2642.90697910051	1764.01257607699	1656.27931879107	1755.58672651267
CP023154	1500648	1500799	-	11484.1564322443	10010.3663138266	9797.07387543651	1376.07226065185	1446.04942297073	1672.81265622417
CP023154	1508015	1508176	-	3222.66991491268	2431.78745911328	2426.26459330054	1458.34716722444	1479.69391082129	1774.96933199297
CP023154	1508113	1508264	+	1239.57615159417	1612.66628377679	1305.33366926984	2968.20292342243	2731.75455731035	1894.24487085208
CP023154	1509069	1509220	+	7920.91517502716	5361.25361933692	3949.86180596762	1630.86523540274	1826.08816080049	3280.28733314501
CP023154	1514477	1514627	-	3927.46914963633	3502.23794501073	3893.91638092745	17713.327106691	15553.0644637202	15094.2024808944
CP023154	1515249	1515401	+	3561.76684732654	3285.81589672792	1490.85256668136	2987.18623944327	2691.05584951242	3014.25314511763
CP023154	1516651	1516802	-	5871.30522775392	10987.8778094782	8160.5570195836	12757.857596957	11985.393276433	13651.9406187042
CP023154	1518873	1519024	-	39514.018047713	19332.9113540236	13515.5567676334	6411.29705175636	5910.75916093412	5882.60838079278
CP023154	1522368	1522538	+	1083.71222060309	796.671414470075	1219.33557709076	2352.42024580161	2673.06529986739	2395.46752167803
CP023154	1526464	1526623	-	93.3822658071443	280.322560691138	286.411154342629	1283.76029557938	1163.62905527881	1152.64950764089
CP023154	1533993	1534156	+	284.546828932021	2477.55278461627	1445.26433323145	2944.6492396164	2245.96112616315	2313.42152635048
CP023154	1538243	1538393	+	149.667079202885	309.908967171786	330.789166869806	923.42991992673	991.159856991126	1009.37509235159
CP023154	1541047	1541197	-	92614.5683787193	20023.4667319941	47252.6682643359	4233.27625227578	4711.23966343044	2633.67567393512
CP023154	1545648	1545798	+	2540.60255248037	3168.85801931554	2132.16000057251	13732.2538086505	15167.1162725542	18879.6412220903
CP023154	1547052	1547226	+	5772.17377934599	3047.81070154521	3243.09566982471	9361.96296127908	8097.51044834838	9990.34724179708
CP023154	1552460	1552655	+	16689.4459191891	9550.97313122796	10131.3634041661	4310.86032721202	5275.16363665522	8132.29796087784
CP023154	1554326	1554476	+	12981.311030775	8102.77265500561	13902.1005802888	1812.09620614439	1992.53606360336	2544.86984908854
CP023154	1554750	1554902	-	704.679982222317	889.194418831187	927.312727189352	1312.88714187009	1226.67678260965	1144.77117957279
CP023154	1559081	1559232	+	1815.86523870325	2409.15192714341	2581.80326942663	2802.05626471968	2642.3793939251	2248.67604426846
CP023154	1560390	1560540	-	210.743238950495	807.545137947684	537.639134684826	1249.4026959966	1115.74368963499	1240.57797481658
CP023154	1567024	1567174	+	26450.0569565273	16169.902161255	22737.2454148257	15050.6885618926	12399.3110821712	17697.9708382547
CP023154	1572941	1573091	-	20082.9496875631	13311.2350959231	19253.5088736545	4440.76431424377	4271.11131489588	4626.60429958449
CP023154	1574179	1574329	+	694.213233960998	2467.15158234345	1463.23590400741	2198.41893324763	2396.81805271977	2365.48282078298
CP023154	1578144	1578294	-	678.33107457056	1531.83027275039	1367.44115251027	6254.08203464505	5501.54996188274	5725.80838881211
CP023154	1578224	1578411	+	1723.76430980532	3256.81954863415	2417.37531724095	6058.10762719693	5275.27334351637	3883.40223058936
CP023154	1578478	1578656	-	4030.44899591929	4307.32777862809	3718.0520344002	2734.9257329561	2604.28415750136	2674.34979782181
CP023154	1579630	1579784	-	10874.5517701297	12261.9530395221	12908.6882958209	1479.95302356812	1472.69554254229	1937.317006471
CP023154	1584519	1584671	+	36330.4625785002	18153.9399449274	20832.0729468465	48206.5499514762	54938.5040179823	55919.8254413813
CP023154	1591466	1591617	-	2329.77894036624	2338.68838533235	1953.90842495085	8441.67618704072	7051.62266360361	5952.61314023914
CP023154	1598135	1598291	+	996.736725902676	2734.49057404907	2440.9290773321	3420.08204193397	2940.13357502794	3527.69724687106
CP023154	1600355	1600505	+	1036.34152586204	1553.58400042985	1574.78913262466	1226.32326634769	1243.17257393457	1399.57647002578
CP023154	1600715	1600995	+	479.366981893053	1866.15679283805	1188.01144223103	9421.70771945685	8630.99370009592	6805.82909185511
CP023154	1601789	1601941	-	57501.29572339	160737.706672576	143926.39389584	2726.32172042746	2484.15902301774	2197.40423017656
CP023154	1608275	1608440	+	12689.3605608447	7780.89010838781	9550.54305336129	1070.70788499113	1238.97486767355	1968.88203278873
CP023154	1608811	1608965	+	1910.06254139757	2519.61119656066	3102.50633645616	3063.593300567	3077.55689094579	2811.18089616879
CP023154	1616576	1616835	+	20230.6936098802	8363.58592574565	9925.186065119	45553.3941340176	46110.9556733932	42086.8282517266
CP023154	1618488	1618638	-	3166.29877546197	1476.65980027207	1990.37494035312	4321.41810428642	4372.30600517271	4798.48973037559
CP023154	1619448	1619599	-	7096.95060419591	5654.76293820669	6462.77562371232	2044.60500460633	2359.45070512502	3491.17610073224
CP023154	1625028	1625187	+	3790.6424570959	2633.13740746394	3140.4493602422	2994.94504577763	2972.78014701193	2646.71283100264
CP023154	1627681	1627833	-	63999.0064091831	35891.0401261843	44476.8683714211	10290.9234973697	10346.8280318451	12570.1431687133
CP023154	1628252	1628403	+	4520.26373253806	4503.5205142118	4750.62567226746	1920.06037660403	1969.27540169545	1727.43038642117
CP023154	1631792	1631942	+	903.224697641842	2817.70733547028	1940.01978509899	934.040422409544	912.238942631362	1041.7108323423
CP023154	1636591	1636788	-	4455.74173392323	3329.45652718491	2976.27609346025	6413.15053242793	7757.10684347463	6541.74941845547
CP023154	1637112	1637269	-	783.111331563837	1869.32400653249	1345.45589686898	2519.3834024385	2883.96661214356	2772.01186804285
CP023154	1637935	1638089	-	7656.45914553116	9494.12061292655	13065.0311168257	4053.75220244518	4553.19521257502	7707.57773747295
CP023154	1639392	1639557	-	18249.4612785285	12195.7935309327	15349.2980007654	3524.83416339277	3609.72921391961	3334.80332087622
CP023154	1641371	1641522	+	13664.2872179209	12778.1802997266	11321.242594503	1342.40370192782	1569.27802744922	1513.75382076955
CP023154	1652169	1652320	-	1077.79304088913	2948.90081714751	1917.44167085872	3679.48687978925	3170.69796663519	2466.60680818918
CP023154	1653214	1653389	-	1086.78616555645	2073.84356526396	2177.49509076501	10178.2722063009	10937.1253543476	11329.6030587789
CP023154	1655724	1655882	+	63116.3527437267	69790.1863558084	49867.9185866373	78852.7649803575	76292.0466588288	118705.89467659
CP023154	1658796	1658948	-	4410.36633000233	10728.6494264147	10299.2215174968	2801.45154704462	2946.75888558287	3502.93158166716
CP023154	1662526	1662678	+	793.184729567772	1970.34171626271	599.564026577443	2851.69933743263	3418.76945139608	3620.87552797754
CP023154	1662948	1663128	-	1023.65665783304	1507.06279514905	1279.53276260637	6484.20145172754	6139.01896052073	3585.15065023338
CP023154	1663481	1663638	-	3193.59752207494	3165.03382973083	7150.84678134319	4616.94628791278	4505.39739712142	4680.81686593287
CP023154	1673282	1673432	+	1710.41547771337	2739.0841641484	3747.5154204891	1194.36416429861	1202.28845308224	1361.89298707494
CP023154	1674042	1674196	-	652.280626989057	563.553711923451	827.146607367624	944.189398568455	1022.01786304636	1052.98739833673
CP023154	1675603	1675889	-	8622.6371507978	6618.5635942054	9978.89258217865	3390.09576683799	3444.96858735148	2998.99214988623
CP023154	1681958	1682117	+	74402.8120496277	62909.6749297725	60293.8250403662	4971.0105905314	5966.87090278599	6368.98972527298
CP023154	1682517	1682777	+	61894.2392014635	37625.6410358589	40375.9520763982	11397.6357812094	14003.7991760848	9956.97681475542
CP023154	1682539	1682689	-	25.8683127523786	26.1903447811652	33.1681448249378	3449.80906563364	3087.96138284742	8007.12529649764
CP023154	1683622	1683806	-	5355.84117103729	3865.0587941973	5215.62421775778	3268.35829294278	3058.95146630408	2431.88330948546
CP023154	1688042	1688194	-	6550.97545417569	5574.8086346948	6567.46327259321	4324.75947096004	4363.64692381549	4249.1830246481
CP023154	1688905	1689056	-	6245.89758526601	6167.84522948554	5014.25896604726	2609.39921220634	2943.6002710735	3639.3342275105
CP023154	1691918	1692069	-	1087.59656958895	3427.43633766279	2353.61856206078	2082.99284555823	1996.41015668606	2362.25549976918
CP023154	1695900	1696053	+	9560.76937603724	8832.45621326839	4347.27985063944	2228.23644148596	3113.96438634868	4080.59906509872
CP023154	1697914	1698064	+	8196.70438318531	10229.6197828037	8430.34461331676	2106.42762540714	1965.85996633313	2295.55467954132
CP023154	1699778	1699928	-	111611.758835894	160622.414236981	123611.210480808	457053.132844918	483227.09489152	405592.393176139
CP023154	1706343	1706505	+	2374.18208549341	1553.7161189064	1932.0852637001	794.787479482137	819.440200081202	940.386562598796
CP023154	1712104	1712292	+	18502.0576039293	5957.96897537758	4352.75253975801	15402.9591020704	15728.158217409	14289.4800879401
CP023154	1714310	1714461	+	17519.055672018	4767.75693016331	12171.5451538878	4773.07662557951	5400.40815083212	3847.31895911305
CP023154	1715502	1715793	-	3575.24454609471	6021.6621463685	5096.41579318995	4190.11835043762	4807.34345363875	4682.03622723731
CP023154	1716055	1716205	-	19028.2115665674	6994.53997265271	13397.1191427634	2556.81193766571	2699.35685393887	2837.12396955517
CP023154	1716610	1716763	-	588.541474282915	653.770233672431	721.024537876674	1549.91693700214	1462.79366416467	1235.91050119484
CP023154	1725996	1726146	+	5916.97932728831	3969.99785078749	3748.6594716733	4981.33749439121	4895.51523549033	4500.6182856338
CP023154	1726362	1726561	+	33905.5484767096	29680.335134145	35771.8525301927	37251.581124382	24256.6030546909	19032.5442529391
CP023154	1726548	1726699	-	226795.246255868	99183.5681519102	127021.399335264	166937.548106157	158334.443258225	175218.439065482
CP023154	1731579	1731729	+	2667.50629437861	2700.00616180122	3249.99960124277	1187.70319453102	1102.22227481184	1524.95731912496
CP023154	1732860	1733025	+	2182.13704191316	1436.83850389375	1700.62687989114	2178.94701037174	2204.78708324364	2104.12876644475
CP023154	1735558	1735708	+	2164.94354411623	1542.3643322718	1643.72505916165	1787.03839773663	1795.25325093778	1664.34764375418
CP023154	1736851	1737008	-	603.449762421871	1116.8567014275	870.754951781425	725.215824603564	820.037738952922	670.074484840197
CP023154	1737411	1737562	-	2923.14998327982	2265.1582109451	2526.75059295618	1077.11271369836	900.714594300872	1057.14305206034
CP023154	1742554	1742704	-	6960.04515889592	4358.22393092767	6075.49082760412	2323.73164508199	2276.73256476862	2922.24023703307
CP023154	1743135	1743285	-	4378.89983670848	5908.01713596867	6078.6723994737	1039.21355862485	1043.85102936547	1027.45655662217
CP023154	1746765	1746915	+	5434.15932679309	2360.12649978042	4746.77853718136	3526.55531569022	3468.21907974063	2907.13246737691
CP023154	1748571	1748721	+	2279.9392908908	4831.2299729043	3292.08950775634	5886.98288229927	5455.54658794025	5500.44670949831
CP023154	1749697	1749961	-	45730.4345280864	38034.2949248515	38127.0352432507	10868.6300464378	11425.8809268547	16030.7170436113
CP023154	1752544	1752694	+	6929.30907793103	5448.39132682061	6723.56633979415	2546.09580288688	2875.05286646446	2135.44335567256
CP023154	1755968	1756255	-	37553.6119505013	20267.477496701	21735.0544261304	44477.114064002	58509.005025485	62639.5680280181
CP023154	1757005	1757209	-	53295.2730622769	38190.1919766292	49264.1519469552	10560.8597978181	12053.8624122253	10781.7719177642
CP023154	1759822	1759973	+	1070.09575452373	1341.37716639183	1191.16005841253	983.751877466189	996.927546874164	927.358703748171
CP023154	1765411	1765562	+	4932.49748080446	11505.4360107646	15093.5641413958	1291.62947353171	1413.97972891563	915.43780600441
CP023154	1769917	1770067	-	439.939121562086	575.079257280527	376.199709739309	1710.98223057288	1867.08088478145	1796.73600992118
CP023154	1772421	1772624	+	24745.2053527382	97023.9863260219	51244.1735822923	29475.4562757796	27028.0577612075	27823.7254658247
CP023154	1774154	1774310	+	17274.2196005287	23053.4844122897	19549.9303707591	5026.94922515902	5244.72103907839	6899.22243076671
CP023154	1779817	1779990	-	7596.26599959098	9724.06280859665	9577.16481473907	4927.16711022165	4964.49304398587	5081.48191291483
CP023154	1779934	1780084	+	16919.722725993	6159.84520573392	9954.6088569714	5425.43279602615	4614.3962209016	5364.88129424711
CP023154	1781511	1781661	+	16159.0714681437	19184.6321672215	17122.6978258015	6788.10099548991	6448.90791730934	7578.8749741863
CP023154	1789346	1789496	+	9696.16452166004	7527.43854211157	8245.04148580884	11341.6609864016	13904.5863263725	11354.731998806
CP023154	1789655	1789806	-	7156.59199379277	5022.50941966472	6928.88097386985	9110.28915696075	7593.69818003344	6938.9543529636
CP023154	1790335	1790485	-	6353.70744917967	8001.96636989618	8660.63352268959	1527.19297533896	1271.73287775738	1371.95342501089
CP023154	1792254	1792405	+	11177.7703010721	16858.8629600289	13841.4139091564	30525.4578996586	28954.0062468194	29523.0995179222
CP023154	1796920	1797070	-	2197.7153838815	446.542596022271	506.749023851656	1233.29944053721	1297.53844991336	727.648487488067
CP023154	1796980	1797131	+	4903.01689843623	12184.4884621238	6873.06070797093	2659.89469061138	2919.22273592347	2856.20325554033
CP023154	1798373	1798529	-	7482.40857328227	3745.48283106848	4905.6512133963	2168.47379498207	1944.95311430157	1983.15559864523
CP023154	1808742	1808896	-	26612.700730922	19761.3787611333	24067.5875931961	1750.04039105443	1879.11286617027	1728.82545772925
CP023154	1809631	1809781	+	21257.3446724664	44760.5531739286	33502.6177204877	2660.82394618843	3128.83591779982	2755.39507056957
CP023154	1810495	1810647	+	12623.5456102763	10450.3968208824	13001.7700296254	5516.01560588463	4949.33984557105	4206.38108027799
CP023154	1810685	1810840	-	1217.04694810093	2735.04691838672	2105.97711787021	1454.94502351619	1294.81417964354	1348.30626069413
CP023154	1816154	1816305	+	8727.82062113115	10043.6434657175	10776.8369232396	1473.78617894172	1661.55736023135	2170.23086513754
CP023154	1828084	1828240	+	11569.2056259784	5319.98753935147	7042.96674494214	10444.7470571729	11056.9399602531	8597.87348616723
CP023154	1832265	1832416	-	10197.8252481097	5022.81835229942	7043.07815181568	3384.82009938576	3741.91902249738	6609.69757829732
CP023154	1842834	1843025	+	313.483744111487	1331.5746835487	973.48351821112	1210.72808575897	1172.00780782917	1146.36616566662
CP023154	1844000	1844151	+	1321.22225134812	1373.12363471452	1459.29277701093	1517.02101032174	1591.36906798941	1478.26041669869
CP023154	1845690	1845843	+	1759.053421932	1334.62978557461	1802.91098633777	1466.77515947542	1391.32695348446	1525.24772501
CP023154	1851171	1851323	-	397.632215106683	356.19717367747	440.662777374498	3725.33850701548	3529.67939749299	2846.12534165508
CP023154	1851513	1851663	-	608.046633555274	1578.73819622266	1707.3338130763	1434.6714624769	1321.09682134828	1650.25826542172
CP023154	1852714	1852864	+	1080.57331111122	1413.38915686209	1658.28823729789	882.297999974906	942.547839877164	993.3267255433
CP023154	1854302	1854455	+	94.3041099612927	181.094540468558	182.774648100362	2506.3188984478	2441.67775696546	2294.15967156983
CP023154	1857044	1857198	+	932.196337786675	795.303820727613	1054.72222741906	743.878523092426	802.810667632498	775.728951691065
CP023154	1860043	1860193	-	3239.56574095975	2004.0482558038	3218.05690282346	8159.68868594679	7507.66448419864	9509.65730335384
CP023154	1862409	1862559	-	20891.6199999799	6122.55123616776	9957.59634401409	7094.57609138653	7304.63443039313	7910.78945401329
CP023154	1867440	1867594	-	17486.8063711892	11588.83155256	11469.8004221181	36046.1253372335	39485.379773801	24944.6010178206
CP023154	1872130	1872280	-	1645.38110586337	4153.20792066372	3381.77612615901	5633.41493566597	5448.82353009193	5276.75149997332
CP023154	1879099	1879272	+	3537.02737703258	19395.0790366868	8004.35022377566	10177.7528337978	9287.78686775929	8243.75713364385
CP023154	1879369	1879519	-	13682.5009300351	7563.66773635313	7396.28211326705	18879.4362591283	19749.1470665917	16251.0841494392
CP023154	1880071	1880221	+	6684.09623189123	9178.2012324077	12169.2400799343	1711.52191508672	1365.54100082569	1473.73465516371
CP023154	1880567	1880757	+	2879.55189322903	3177.37967156161	3164.02069579573	4580.47666510137	5269.5865150331	4002.94313973938
CP023154	1883734	1883885	-	94767.3326134317	131137.622092971	170822.182586276	17958.2847622392	15232.3826371616	16400.764964733
CP023154	1886022	1886172	+	804.724460356199	527.580646105188	750.959554281784	1830.98841977404	2241.93060633399	1642.35570328657
CP023154	1888882	1889058	-	2008.09336957327	1744.19332711413	2663.64863722522	1692.16424953762	1319.74337848342	1274.86917336857
CP023154	1888957	1889129	+	66.4587247427931	488.17462325687	328.854933817639	9613.38797795292	9068.20491221392	8483.30647458575
CP023154	1889259	1889411	-	215.4926136242	191.841018154184	366.64135506452	1273.41638820533	1272.09344435771	1483.51678068945

## Sheet: DESeq2 output
Table S1. DESeq2 results based on Salmon quantification using he homer dervied regions as reference transcriptome.
chr	start	end	strand	Base mean	log2(FC)	StdErr	Wald-Stats	P-value	P-adj
CP023154	517	670	-	1506.13	0.471357	0.160769	2.93189	0.00336911	0.00523323
CP023154	1324	1479	-	847.94	1.33318	0.220827	6.03721	1.56799e-09	4.40189e-09
CP023154	8180	8331	-	2947.21	-0.359088	0.154306	-2.32712	0.0199588	0.0275729
CP023154	10798	10948	-	56622.9	-4.18566	0.376491	-11.1176	1.03051e-28	1.03389e-27
CP023154	11104	11257	+	24361.3	-0.632232	0.39409	-1.60428	0.108651	0.134878
CP023154	11421	11706	+	32286.8	1.31535	0.439166	2.99511	0.00274342	0.00430506
CP023154	12629	12780	+	12079.5	0.959579	0.365265	2.62708	0.00861215	0.0124897
CP023154	14503	14653	-	2125.83	2.51558	0.329305	7.63906	2.18819e-14	8.75278e-14
CP023154	23394	23544	+	35502.5	-3.04629	0.259117	-11.7564	6.54469e-32	8.70729e-31
CP023154	25636	25794	-	804.012	2.15044	0.249272	8.62688	6.30458e-18	3.16262e-17
CP023154	33016	33166	-	34120.5	-3.45103	0.280237	-12.3147	7.55016e-35	1.15517e-33
CP023154	35020	35235	-	25317.8	-3.52187	0.249516	-14.1148	3.07812e-45	7.53524e-44
CP023154	36094	36244	-	2793.61	0.625199	0.223543	2.79677	0.00516167	0.00772357
CP023154	40380	40531	+	1351.55	-0.696011	0.173833	-4.0039	6.23069e-05	0.000116969
CP023154	41102	41252	-	2624.51	0.701385	0.189488	3.70148	0.000214346	0.000383567
CP023154	42619	42771	+	1826.41	0.171185	0.179953	0.951275	0.341465	0.386993
CP023154	48273	48424	+	2543.03	1.06031	0.260742	4.06653	4.77194e-05	9.04156e-05
CP023154	49221	49468	-	7196.74	-0.00814481	0.363823	-0.0223867	0.982139	0.988601
CP023154	58804	58954	+	3289.82	-0.532789	0.262338	-2.03093	0.0422623	0.0556227
CP023154	60719	60894	-	4716.55	-0.840529	0.270244	-3.11026	0.00186921	0.00297906
CP023154	61597	61747	+	1228.27	4.28375	0.291352	14.703	6.16684e-49	1.88705e-47
CP023154	66328	66540	+	1575.9	-0.00428066	0.242566	-0.0176474	0.98592	0.990362
CP023154	66875	67026	-	2642.52	-1.55823	0.127561	-12.2155	2.56887e-34	3.74321e-33
CP023154	71990	72141	-	2370.99	0.344762	0.319625	1.07865	0.280746	0.323572
CP023154	72671	72824	-	2364.28	-1.70569	0.171892	-9.92301	3.30628e-23	2.56132e-22
CP023154	74014	74165	+	1884.62	-0.908215	0.360691	-2.51798	0.0118029	0.0169165
CP023154	79862	80032	-	1067.28	1.98995	0.274263	7.25564	3.99778e-13	1.51027e-12
CP023154	82142	82294	+	4008.08	0.306162	0.261927	1.16888	0.242451	0.283168
CP023154	86166	86419	-	28750.7	-0.110246	0.182486	-0.604134	0.545754	0.586998
CP023154	86757	86919	-	15151	-2.16497	0.334128	-6.47946	9.20542e-11	2.78897e-10
CP023154	89135	89285	+	2985.44	0.856204	0.239555	3.57415	0.000351374	0.000610912
CP023154	102615	102798	+	2434.9	-0.225934	0.157005	-1.43902	0.150144	0.181597
CP023154	102997	103151	-	3509.11	0.977135	0.188271	5.19005	2.10238e-07	5.1448e-07
CP023154	107237	107387	-	2962.01	1.29356	0.369436	3.50145	0.000462741	0.000791055
CP023154	110872	111025	+	2862.68	-1.84782	0.313155	-5.90064	3.62094e-09	9.80538e-09
CP023154	118288	118472	-	2325.53	0.902621	0.211656	4.26456	2.00295e-05	3.99284e-05
CP023154	120618	120768	+	558576	-2.53318	0.531927	-4.76226	1.91433e-06	4.19917e-06
CP023154	121937	122096	+	368201	-4.50858	0.452984	-9.95306	2.44543e-23	1.94364e-22
CP023154	124277	124427	+	524395	-5.1935	0.381597	-13.6099	3.49699e-42	7.37986e-41
CP023154	124987	125137	+	607179	-6.08345	0.435675	-13.9633	2.6117e-44	6.14753e-43
CP023154	138919	139099	-	5094.49	0.736808	0.253608	2.9053	0.00366899	0.00565598
CP023154	143269	143458	+	3264.16	-0.0335372	0.17455	-0.192135	0.847636	0.870392
CP023154	146245	146403	-	6091.12	-1.17945	0.193122	-6.10726	1.01358e-09	2.87182e-09
CP023154	153173	153324	-	3015.15	-0.722519	0.258196	-2.79833	0.00513671	0.00770506
CP023154	153700	153877	-	5617.99	-1.36076	0.189217	-7.19152	6.40717e-13	2.32023e-12
CP023154	159359	159509	+	1676.65	-1.77104	0.423242	-4.18447	2.85838e-05	5.58891e-05
CP023154	159360	159545	-	5993.77	-1.59394	0.245173	-6.50129	7.96358e-11	2.43686e-10
CP023154	165177	165380	-	3469.39	0.314733	0.158496	1.98575	0.0470614	0.0614106
CP023154	165216	165368	+	88.6212	0.178058	1.09438	0.162702	NA	NA
CP023154	165588	165754	-	1889.89	-1.67017	0.186029	-8.978	2.75736e-19	1.52027e-18
CP023154	166793	166943	+	1752.01	0.671123	0.31184	2.15214	0.0313864	0.0422164
CP023154	171668	171851	+	1176.37	1.76066	0.312619	5.63198	1.78154e-08	4.6794e-08
CP023154	172186	172361	+	3033.01	2.91902	0.171091	17.0612	2.88483e-65	1.60502e-63
CP023154	187156	187307	+	1393.89	-0.137803	0.271793	-0.507016	0.612144	0.652669
CP023154	191779	191929	+	5285.85	-2.04201	0.202864	-10.0659	7.81463e-24	6.29283e-23
CP023154	192845	192997	+	10610	-2.22652	0.275801	-8.07293	6.86296e-16	3.06579e-15
CP023154	193801	193954	-	854.332	1.34632	0.323077	4.16719	3.08372e-05	5.99123e-05
CP023154	196200	196378	-	1977.92	1.25706	0.267181	4.70492	2.53971e-06	5.49223e-06
CP023154	196287	196437	+	1601.43	-0.509555	0.237365	-2.14671	0.0318164	0.0427009
CP023154	197793	197946	-	2385.71	0.299259	0.148116	2.02043	0.0433386	0.0569168
CP023154	200709	200863	+	968.442	0.605231	0.372767	1.62362	0.104458	0.129935
CP023154	202595	202752	+	573.698	0.404589	0.19424	2.08293	0.0372576	0.0496768
CP023154	203813	203964	-	684.652	3.31474	0.25305	13.0992	3.32895e-39	5.65922e-38
CP023154	204247	204413	-	559.059	2.22952	0.195309	11.4153	3.50511e-30	3.90023e-29
CP023154	204859	205010	-	753.208	1.95228	0.172811	11.2972	1.35503e-29	1.40555e-28
CP023154	206334	206489	+	1099.22	0.149046	0.184654	0.807165	0.419571	0.466021
CP023154	209885	210035	-	2697.84	-0.633029	0.17563	-3.60434	0.000312948	0.000551943
CP023154	210680	210830	-	8727.59	-1.47465	0.162143	-9.09471	9.4839e-20	5.37421e-19
CP023154	211394	211553	-	11197.7	-2.94953	0.309028	-9.54455	1.36697e-21	8.99555e-21
CP023154	216609	216760	-	4524.74	-2.70812	0.19846	-13.6457	2.14164e-42	4.85439e-41
CP023154	217246	217397	-	2795.06	-1.7646	0.210948	-8.36508	6.00733e-17	2.80648e-16
CP023154	218675	218826	+	4750.3	0.270907	0.268984	1.00715	0.313864	0.358367
CP023154	220400	220550	+	6527.03	-2.48405	0.277119	-8.96383	3.13585e-19	1.71352e-18
CP023154	222408	222561	-	1349.85	3.84356	0.354115	10.854	1.90921e-27	1.77036e-26
CP023154	229231	229385	+	3437.83	0.59496	0.17233	3.45245	0.000555519	0.000944382
CP023154	230216	230366	-	1581.05	1.22791	0.151427	8.10895	5.10592e-16	2.31468e-15
CP023154	231624	231774	-	3330.02	2.27283	0.238317	9.53701	1.47007e-21	9.57107e-21
CP023154	233539	233689	-	2152.92	-0.390487	0.176701	-2.20988	0.0271138	0.0368748
CP023154	239687	239881	+	2701.8	2.39324	0.362551	6.60112	4.08069e-11	1.30389e-10
CP023154	239699	239851	-	900.699	-2.19009	0.768403	-2.85018	0.0043694	0.00665193
CP023154	244455	244607	+	27334.5	-0.00770509	0.477482	-0.0161369	0.987125	0.990362
CP023154	245241	245393	+	15506.6	-0.999286	0.272613	-3.66559	0.000246774	0.000439028
CP023154	245925	246075	+	5807.04	0.220706	0.363018	0.607975	0.543204	0.585283
CP023154	256394	256544	-	20983.9	-2.55476	0.22133	-11.5428	8.031e-31	9.82994e-30
CP023154	259060	259210	+	23154.7	2.44749	0.216213	11.3198	1.04664e-29	1.10439e-28
CP023154	259546	259696	-	747.532	0.75762	0.180489	4.19759	2.69774e-05	5.29173e-05
CP023154	259601	259751	+	1970.15	0.595961	0.37604	1.58483	0.113004	0.139715
CP023154	265250	265405	+	3072.2	1.31207	0.154117	8.51347	1.68798e-17	8.33098e-17
CP023154	267147	267298	-	2584.95	-0.0411127	0.179867	-0.228573	0.819201	0.845448
CP023154	272501	272652	-	891.286	0.190381	0.196951	0.96664	0.333724	0.378922
CP023154	279198	279348	+	7927.72	-0.207433	0.192192	-1.0793	0.280455	0.323572
CP023154	280168	280319	-	5005.5	-2.21884	0.194334	-11.4177	3.41267e-30	3.86769e-29
CP023154	284513	284663	+	2465.07	-0.728292	0.188222	-3.86932	0.000109139	0.000200579
CP023154	287232	287398	-	3295.35	-0.857551	0.243327	-3.52427	0.000424644	0.000727961
CP023154	290117	290268	+	1546.77	0.457733	0.178775	2.56039	0.0104555	0.0150914
CP023154	295791	295945	+	92712.6	3.42605	0.348545	9.82959	8.39619e-23	6.19093e-22
CP023154	296347	296498	-	14297.4	-1.62861	0.474142	-3.43485	0.000592876	0.00100077
CP023154	296417	296568	+	20456.1	-1.15124	0.290863	-3.95803	7.557e-05	0.000141434
CP023154	299609	299759	-	1551.38	-0.124877	0.179152	-0.697045	0.485775	0.527117
CP023154	301881	302032	+	3813.43	-1.65618	0.267638	-6.18815	6.08759e-10	1.79116e-09
CP023154	304306	304473	-	1450.24	1.34758	0.199047	6.77016	1.2864e-11	4.25556e-11
CP023154	308120	308271	+	1852.21	0.305019	0.201578	1.51315	0.130241	0.159734
CP023154	310757	310907	-	4458.46	-0.989342	0.267843	-3.69373	0.000220984	0.000394293
CP023154	311122	311275	-	4309.34	-2.8376	0.246972	-11.4895	1.48901e-30	1.75245e-29
CP023154	317044	317198	-	85674.3	-4.13424	0.463919	-8.91156	5.03187e-19	2.72523e-18
CP023154	319071	319221	-	5776.61	0.806876	0.341925	2.35981	0.0182845	0.0254321
CP023154	322980	323130	+	5450.04	-1.74477	0.201385	-8.66386	4.56072e-18	2.32597e-17
CP023154	325111	325261	-	858.23	3.5798	0.291548	12.2786	1.18005e-34	1.76145e-33
CP023154	328320	328612	+	2422.98	3.07241	0.2396	12.8231	1.21755e-37	1.96089e-36
CP023154	331480	331634	+	738.109	1.44232	0.665725	2.16654	0.0302699	0.0408944
CP023154	332310	332477	-	1070.65	-0.842702	0.184876	-4.55821	5.15919e-06	1.07762e-05
CP023154	335501	335651	-	1437.88	1.6051	0.37252	4.30877	1.64165e-05	3.32679e-05
CP023154	342280	342430	-	4094.74	-0.696611	0.2389	-2.91591	0.00354652	0.00548098
CP023154	345126	345281	-	10668.5	-2.45879	0.293371	-8.38116	5.24094e-17	2.4864e-16
CP023154	346413	346563	+	902.884	2.17921	0.305393	7.13576	9.62536e-13	3.46513e-12
CP023154	347138	347290	+	2272.31	0.765455	0.195892	3.90753	9.32438e-05	0.00017345
CP023154	349923	350073	-	5881.31	-0.0886351	0.203787	-0.434939	0.663607	0.701429
CP023154	351151	351301	-	5235.72	1.98616	0.169468	11.72	1.00713e-31	1.28409e-30
CP023154	351694	351844	-	3653.01	-0.411792	0.198959	-2.06973	0.0384778	0.0511922
CP023154	353955	354105	+	5167.69	0.125365	0.2603	0.481619	0.630076	0.669456
CP023154	358171	358324	-	874.85	1.53593	0.307037	5.00244	5.66105e-07	1.32742e-06
CP023154	366618	366769	-	641.037	0.272277	0.190842	1.42671	0.153663	0.185121
CP023154	367040	367192	+	1070.04	0.211768	0.281263	0.752917	0.4515	0.495193
CP023154	371728	371886	-	986.389	0.0681682	0.227481	0.299665	0.764433	0.796989
CP023154	373151	373301	-	1565.4	-0.0793222	0.272765	-0.290808	0.771198	0.802676
CP023154	378523	378673	+	3272.06	-0.309303	0.207939	-1.48747	0.136891	0.166887
CP023154	379045	379195	+	5661.12	-1.71825	0.22708	-7.5667	3.82826e-14	1.49229e-13
CP023154	379601	379760	-	1203.71	2.6396	0.229396	11.5067	1.21994e-30	1.46392e-29
CP023154	384337	384487	+	1301.62	2.34358	0.20055	11.6858	1.50676e-31	1.88191e-30
CP023154	385327	385477	+	1428.04	1.24418	0.244343	5.09195	3.54409e-07	8.51999e-07
CP023154	385420	385614	-	1028.27	0.0435179	0.169248	0.257125	0.797082	0.825405
CP023154	391612	391796	-	27761.2	-3.91951	0.202954	-19.3123	4.23063e-83	6.47287e-81
CP023154	391999	392149	-	2239.04	0.78529	0.132198	5.94026	2.84567e-09	7.84481e-09
CP023154	393184	393335	+	1623.25	3.71281	0.423263	8.77187	1.75727e-18	9.19187e-18
CP023154	399342	399492	+	761.446	1.27776	0.20822	6.13657	8.43197e-10	2.42271e-09
CP023154	401785	401937	+	1312.23	0.415563	0.155937	2.66494	0.0077001	0.0112469
CP023154	403842	403992	-	1670.69	1.06735	0.161701	6.60076	4.09064e-11	1.30389e-10
CP023154	404932	405083	+	1889.48	0.206961	0.274448	0.754099	0.45079	0.495193
CP023154	405745	405895	-	2288.96	-0.047498	0.295598	-0.160684	0.872342	0.891274
CP023154	406959	407110	-	1260.45	0.932474	0.183429	5.08357	3.70413e-07	8.85518e-07
CP023154	417390	417542	+	677.075	0.119148	0.207716	0.573608	0.566233	0.607955
CP023154	418113	418264	-	1170.67	0.24795	0.284598	0.871229	0.383629	0.430791
CP023154	423838	424124	+	1711.53	1.80623	0.293743	6.14903	7.79602e-10	2.25055e-09
CP023154	424667	424828	+	640.347	1.12411	0.228713	4.91491	8.88233e-07	2.03595e-06
CP023154	429194	429349	+	534.077	1.1489	0.224771	5.11141	3.19768e-07	7.73509e-07
CP023154	431564	431717	+	2201.98	-1.46194	0.400238	-3.65267	0.000259523	0.000460371
CP023154	441725	441887	+	2148.12	1.38914	0.186325	7.45549	8.95356e-14	3.44628e-13
CP023154	441910	442060	-	541.15	0.500597	0.184696	2.71039	0.00672044	0.00993456
CP023154	447911	448062	-	3636.47	3.65505	0.251922	14.5086	1.06816e-47	2.97143e-46
CP023154	448900	449053	-	8512.7	1.23888	0.248543	4.98456	6.21021e-07	1.44511e-06
CP023154	450816	450973	+	898.061	3.86854	0.352869	10.9631	5.7486e-28	5.58436e-27
CP023154	455359	455510	-	1635.5	2.31952	0.183413	12.6464	1.17086e-36	1.83735e-35
CP023154	460365	460515	-	4598.25	-0.544834	0.236469	-2.30404	0.0212204	0.0290534
CP023154	463469	463743	+	5474.66	-1.87944	0.23342	-8.05174	8.16227e-16	3.61979e-15
CP023154	466470	466621	-	3708.23	-0.451399	0.227189	-1.98689	0.0469347	0.0613761
CP023154	469451	469601	-	3349.04	0.874988	0.377891	2.31545	0.0205883	0.0282511
CP023154	479792	479943	-	14588.9	0.668341	0.27829	2.4016	0.0163235	0.0230184
CP023154	500587	500783	+	17022.6	-1.79727	0.175956	-10.2143	1.71067e-24	1.3959e-23
CP023154	504253	504424	-	2545.91	-0.810817	0.197242	-4.11077	3.94349e-05	7.56558e-05
CP023154	504905	505055	-	5710.14	-0.161589	0.181201	-0.891769	0.372517	0.419853
CP023154	508495	508645	+	39354.1	0.945156	0.392852	2.40588	0.0161334	0.0228028
CP023154	510559	510709	-	890.261	1.70519	0.259469	6.57186	4.96913e-11	1.55954e-10
CP023154	512327	512490	-	831.391	2.4726	0.263059	9.39939	5.48786e-21	3.29272e-20
CP023154	514419	514577	+	5171.13	-1.88164	0.247333	-7.60774	2.78931e-14	1.09427e-13
CP023154	516120	516320	-	1958.85	2.98902	0.179755	16.6283	4.34454e-62	1.89919e-60
CP023154	519154	519306	+	1974.29	1.71796	0.245511	6.99748	2.60614e-12	9.11404e-12
CP023154	522429	522586	-	615.443	1.0246	0.315601	3.24651	0.0011683	0.0019016
CP023154	525542	525709	+	7039.61	-3.04286	0.204923	-14.8488	7.07925e-50	2.54853e-48
CP023154	526537	526687	-	1409.62	1.03267	0.22781	4.53304	5.81409e-06	1.21028e-05
CP023154	527326	527476	+	2437.01	-0.977035	0.18203	-5.36745	7.98588e-08	2.01957e-07
CP023154	533922	534073	+	5566.19	1.49797	0.245375	6.10481	1.02925e-09	2.90278e-09
CP023154	538318	538472	-	991.696	0.970082	0.191219	5.07315	3.91277e-07	9.31757e-07
CP023154	539056	539208	-	1249.2	-0.0275982	0.28722	-0.0960875	0.923451	0.934136
CP023154	545282	545432	+	1042.72	-0.290875	0.200329	-1.45198	0.146506	0.177548
CP023154	545678	545828	+	1516.32	1.69878	0.200321	8.4803	2.24607e-17	1.08236e-16
CP023154	547380	547539	-	12012.9	-1.59889	0.281214	-5.68568	1.30296e-08	3.46701e-08
CP023154	555922	556083	-	1852.68	0.927619	0.19421	4.77637	1.78487e-06	3.94346e-06
CP023154	560351	560586	-	2957.48	-0.932192	0.187191	-4.9799	6.3618e-07	1.47478e-06
CP023154	561487	561640	+	2302.5	1.23674	0.233761	5.29063	1.21894e-07	3.04486e-07
CP023154	563333	563508	-	2208.38	0.923729	0.398359	2.31883	0.020404	0.0280612
CP023154	570208	570362	+	549.721	-0.000706728	0.189452	-0.00373039	0.997024	0.997024
CP023154	571471	571621	-	802.477	-0.645711	0.215058	-3.0025	0.0026777	0.0042345
CP023154	573674	573842	+	1502.67	-0.764319	0.165969	-4.60518	4.12104e-06	8.72692e-06
CP023154	574538	574720	-	1045.85	-0.100456	0.270546	-0.371308	0.710408	0.745745
CP023154	577540	577695	+	822.436	0.87711	0.183216	4.78731	1.69028e-06	3.74801e-06
CP023154	585965	586116	+	1439.4	-0.471353	0.157114	-3.00006	0.00269923	0.00425755
CP023154	589049	589200	-	5699.33	-0.984202	0.150799	-6.52659	6.72848e-11	2.07971e-10
CP023154	590431	590581	-	3950.1	-1.34348	0.270597	-4.96485	6.87528e-07	1.58183e-06
CP023154	597374	597527	-	3039	-0.0330493	0.270197	-0.122316	0.902649	0.916121
CP023154	605169	605333	+	1811.03	0.182046	0.224056	0.812503	0.416503	0.463455
CP023154	607020	607170	-	38621.5	0.518489	0.348287	1.48868	0.13657	0.166829
CP023154	610945	611162	+	1924.37	0.350738	0.204831	1.71233	0.0868367	0.108902
CP023154	613412	613564	+	1854.22	0.0803224	0.144158	0.557183	0.577403	0.61778
CP023154	613659	613810	-	1308.63	-0.696907	0.263448	-2.64533	0.00816122	0.0118638
CP023154	617375	617535	+	1482.55	2.86106	0.216914	13.1898	1.00456e-39	1.863e-38
CP023154	619204	619406	+	2581.01	0.207116	0.147448	1.40467	0.16012	0.192144
CP023154	621137	621295	+	1513.79	-1.11149	0.187146	-5.93917	2.86464e-09	7.86169e-09
CP023154	621725	621901	-	911.63	1.55129	0.170955	9.07425	1.1446e-19	6.36817e-19
CP023154	625551	625701	-	1052.92	0.842961	0.205504	4.10193	4.09724e-05	7.83597e-05
CP023154	638155	638342	-	3706.7	-1.58019	0.21947	-7.20006	6.01873e-13	2.20567e-12
CP023154	640596	640750	+	3924.67	-1.01951	0.238996	-4.26582	1.99173e-05	3.98345e-05
CP023154	640944	641097	+	1907.62	3.02132	0.14286	21.1489	2.82606e-99	8.64776e-97
CP023154	644565	644715	+	1866.02	2.16964	0.152986	14.1819	1.18593e-45	3.02411e-44
CP023154	645547	645698	-	1084.32	0.45652	0.249096	1.83271	0.0668456	0.0859444
CP023154	648267	648441	+	1220.22	-0.135814	0.275248	-0.493424	0.621713	0.661719
CP023154	650571	650721	-	1627.72	0.943349	0.643298	1.46643	0.142532	0.173075
CP023154	656792	657001	-	2305.56	-0.648677	0.192198	-3.37504	0.00073804	0.00123074
CP023154	657348	657507	-	1124.63	-0.466145	0.137276	-3.39567	0.000684605	0.00114789
CP023154	661279	661461	+	1994.94	1.71	0.211127	8.09938	5.52409e-16	2.48584e-15
CP023154	666535	666686	+	2825.02	-0.620033	0.175746	-3.528	0.000418707	0.000719799
CP023154	667566	667716	+	1908.22	-0.455609	0.29748	-1.53156	0.125631	0.1547
CP023154	672926	673084	-	985.234	-0.720478	0.204104	-3.52995	0.000415631	0.000716525
CP023154	678304	678457	+	156282	2.1826	0.376318	5.79989	6.63566e-09	1.78115e-08
CP023154	693767	693967	-	3035.87	-1.96096	0.203686	-9.62738	6.12737e-22	4.26131e-21
CP023154	694263	694416	-	4447.31	-2.44425	0.296002	-8.25755	1.48697e-16	6.79122e-16
CP023154	694888	695038	-	11606.1	-4.02617	0.427145	-9.42577	4.26962e-21	2.62256e-20
CP023154	697184	697398	-	1959.24	0.493617	0.252467	1.95518	0.0505621	0.0655593
CP023154	700509	700662	+	6527.64	-1.1228	0.262328	-4.28016	1.86758e-05	3.7474e-05
CP023154	702717	702876	+	7645.96	-0.577371	0.295108	-1.95647	0.0504097	0.0655005
CP023154	703171	703321	+	17108.2	1.7483	0.320454	5.4557	4.87807e-08	1.25436e-07
CP023154	711933	712086	+	594.772	2.74584	0.253782	10.8197	2.77703e-27	2.53663e-26
CP023154	714652	714802	-	13586.7	-1.16426	0.250253	-4.65232	3.28224e-06	7.02353e-06
CP023154	716898	717049	+	918.932	2.07735	0.30001	6.92428	4.38204e-12	1.50663e-11
CP023154	721517	721671	+	2047.2	1.37958	0.142144	9.7055	2.85662e-22	2.05677e-21
CP023154	728439	728689	+	5676.4	-0.917965	0.136957	-6.70257	2.04787e-11	6.66648e-11
CP023154	731094	731248	+	2321.17	-0.316031	0.132507	-2.38502	0.0170781	0.023972
CP023154	733767	733920	-	1828.43	-0.63517	0.353205	-1.7983	0.0721289	0.0925427
CP023154	739632	739782	-	4775.44	-0.746426	0.265772	-2.80852	0.00497692	0.00750216
CP023154	744117	744268	+	457.505	2.64626	0.232454	11.384	5.02506e-30	5.49167e-29
CP023154	751819	751970	+	2449.08	-1.3091	0.239259	-5.47148	4.46284e-08	1.15243e-07
CP023154	754315	754480	+	5251.89	0.119759	0.163223	0.733716	0.463122	0.504759
CP023154	754480	754630	-	1956.06	-1.24121	0.219035	-5.66672	1.45558e-08	3.85635e-08
CP023154	758485	758637	-	1627.83	1.768	0.204249	8.65609	4.88204e-18	2.46926e-17
CP023154	760102	760268	+	1040.37	0.427033	0.183052	2.33285	0.0196562	0.0272163
CP023154	764093	764285	-	3936.49	-0.103065	0.154966	-0.665084	0.505997	0.546155
CP023154	765966	766122	+	1922.78	1.30223	0.240586	5.41274	6.20685e-08	1.58937e-07
CP023154	771724	771886	-	935.044	-0.778931	0.23037	-3.38122	0.00072166	0.00120671
CP023154	781521	781728	-	9769.67	-1.11798	0.23637	-4.7298	2.2474e-06	4.8947e-06
CP023154	782815	782972	+	1905.94	-0.227891	0.180065	-1.2656	0.205655	0.242507
CP023154	790775	790927	-	13996	-2.76882	0.260086	-10.6458	1.82436e-26	1.61813e-25
CP023154	793591	793741	-	2556.76	-0.271508	0.208371	-1.303	0.192573	0.227519
CP023154	794322	794472	-	4059.78	0.305982	0.17145	1.78467	0.0743146	0.094949
CP023154	795085	795235	+	2588.42	1.8408	0.341328	5.39306	6.92676e-08	1.75899e-07
CP023154	796093	796244	+	4078.12	-1.64201	0.403259	-4.07185	4.6641e-05	8.86468e-05
CP023154	799522	799672	-	1638.42	0.703324	0.188668	3.72783	0.000193134	0.000348666
CP023154	811034	811343	-	1899.13	1.68209	0.355712	4.7288	2.25854e-06	4.90151e-06
CP023154	812340	812498	+	1523.39	0.420722	0.177293	2.37303	0.0176429	0.0245956
CP023154	813614	813838	+	1836.68	-0.536076	0.164412	-3.26056	0.00111192	0.00181465
CP023154	816212	816362	-	836.956	2.005	0.23313	8.60034	7.9483e-18	3.95476e-17
CP023154	819045	819195	+	3923.21	1.87319	0.271841	6.89075	5.54985e-12	1.88695e-11
CP023154	824149	824310	+	6942.92	-1.24014	0.194791	-6.36652	1.93364e-10	5.77263e-10
CP023154	824946	825096	+	8250.65	-0.370625	0.216117	-1.71493	0.0863576	0.108747
CP023154	827011	827162	-	2137.01	-0.980851	0.270456	-3.62665	0.000287117	0.000507849
CP023154	837296	837456	-	8378.39	0.987494	0.349153	2.82826	0.00468022	0.00710743
CP023154	837641	837792	-	10262.8	0.154226	0.187176	0.823958	0.409963	0.457008
CP023154	840587	840741	+	1770.61	1.90848	0.2308	8.26896	1.35137e-16	6.26544e-16
CP023154	843855	844005	-	1041.78	1.94575	0.195995	9.92754	3.15955e-23	2.47903e-22
CP023154	847212	847457	+	8981.57	-0.465106	0.200252	-2.3226	0.0202007	0.0278442
CP023154	849959	850175	+	14155.3	1.22748	0.330213	3.71722	0.000201425	0.000361501
CP023154	852576	852726	-	57169	-2.01013	0.262876	-7.6467	2.06196e-14	8.30209e-14
CP023154	859304	859462	-	1449.04	0.306239	0.180813	1.69368	0.0903259	0.113046
CP023154	860017	860273	+	3309.36	-0.365903	0.161508	-2.26554	0.0234797	0.0320749
CP023154	863220	863370	+	2158.33	-0.255697	0.154252	-1.65766	0.0973869	0.121387
CP023154	872336	872489	-	1050.56	1.72159	0.223187	7.7137	1.22223e-14	4.9867e-14
CP023154	873664	873814	-	1840.95	-1.00726	0.230166	-4.37624	1.20743e-05	2.46315e-05
CP023154	875762	875916	+	4719.13	-1.57719	0.324019	-4.86759	1.12968e-06	2.5606e-06
CP023154	876865	877015	-	1354.6	1.57222	0.197284	7.9693	1.5957e-15	6.97551e-15
CP023154	881898	882051	-	657.413	0.556996	0.284063	1.96082	0.0499002	0.0649765
CP023154	886702	886870	+	2218.21	-1.05612	0.178244	-5.92511	3.12087e-09	8.52667e-09
CP023154	890727	890880	-	4092.27	2.47746	0.281042	8.81527	1.19395e-18	6.29911e-18
CP023154	894362	894512	+	3507.27	0.979246	0.273166	3.5848	0.000337331	0.000591538
CP023154	895069	895219	+	2254.03	-1.0212	0.208874	-4.88906	1.01319e-06	2.3137e-06
CP023154	900718	900869	-	3258.45	-1.76375	0.34214	-5.15507	2.53538e-07	6.15736e-07
CP023154	903676	903826	+	3078.27	1.5252	0.248759	6.13123	8.71997e-10	2.49375e-09
CP023154	907612	907762	-	12655.7	1.03817	0.35875	2.89386	0.00380533	0.0058514
CP023154	909866	910016	-	10053	-2.87499	0.159536	-18.021	1.33353e-72	1.16588e-70
CP023154	912987	913141	-	6357.24	-1.36032	0.20408	-6.66562	2.63544e-11	8.5338e-11
CP023154	920122	920272	-	2100.02	-1.55778	0.152434	-10.2194	1.62371e-24	1.34285e-23
CP023154	920255	920407	+	2203.38	-0.237484	0.282804	-0.839748	0.40105	0.447888
CP023154	923173	923323	-	1508.23	0.694562	0.180119	3.85612	0.000115199	0.000211083
CP023154	930262	930413	-	2433.66	1.45274	0.621847	2.33618	0.019482	0.0270363
CP023154	932799	932951	-	11857.9	-3.38573	0.148706	-22.7679	9.5369e-115	5.83658e-112
CP023154	933921	934071	-	4829.26	0.0143024	0.252879	0.0565581	0.954897	0.962763
CP023154	935991	936147	-	2796.43	-0.316672	0.292887	-1.08121	0.279603	0.323473
CP023154	936683	936833	+	2525.07	-0.259354	0.225164	-1.15184	0.249386	0.290713
CP023154	940237	940393	+	800.629	1.5111	0.275619	5.48255	4.19248e-08	1.0872e-07
CP023154	942303	942454	+	1040.94	1.53999	0.389256	3.95623	7.61424e-05	0.000142071
CP023154	948758	948916	+	1605.09	2.76997	0.304934	9.08385	1.04803e-19	5.88435e-19
CP023154	952664	952815	+	657.48	1.34931	0.205353	6.57072	5.00725e-11	1.56349e-10
CP023154	956945	957147	+	2134.43	1.12115	0.241422	4.64394	3.41831e-06	7.28922e-06
CP023154	957500	957651	-	791.092	3.65142	0.327081	11.1637	6.14051e-29	6.26332e-28
CP023154	959542	959693	-	5036.97	1.33559	0.151371	8.82325	1.11186e-18	5.91701e-18
CP023154	961982	962134	+	3087.8	2.15433	0.141271	15.2496	1.6559e-52	6.75608e-51
CP023154	962899	963051	-	1486.79	0.450145	0.163548	2.75237	0.00591647	0.00883142
CP023154	969200	969356	-	2007.39	3.21906	0.618078	5.20817	1.90707e-07	4.70616e-07
CP023154	969754	969931	-	5558.12	-1.51249	0.16526	-9.1522	5.57878e-20	3.22096e-19
CP023154	970017	970167	+	3759.49	-0.163056	0.205773	-0.792405	0.428124	0.474423
CP023154	971463	971613	-	2180.62	-0.277537	0.154847	-1.79233	0.0730797	0.0935664
CP023154	973709	973859	+	2391	1.87724	0.196021	9.57675	1.00142e-21	6.73485e-21
CP023154	974005	974160	-	3194.31	0.797891	0.261399	3.05239	0.00227027	0.00360884
CP023154	974010	974176	+	4679.55	0.902857	0.322315	2.80116	0.0050919	0.00765661
CP023154	975866	976020	-	2868.45	0.326835	0.190706	1.71381	0.086563	0.108781
CP023154	978776	978928	+	5840.09	-1.39134	0.28746	-4.84011	1.29765e-06	2.90901e-06
CP023154	979586	979736	-	3247.88	1.16877	0.281735	4.14847	3.34712e-05	6.46194e-05
CP023154	979674	979824	+	3594.25	0.159368	0.230429	0.691612	0.489181	0.529874
CP023154	982950	983100	+	2401.43	0.401904	0.169075	2.37708	0.0174505	0.0243828
CP023154	983433	983584	-	2668.25	-2.06281	0.316578	-6.51595	7.22308e-11	2.22137e-10
CP023154	984010	984170	-	14112.7	-3.74415	0.442107	-8.46889	2.47733e-17	1.18447e-16
CP023154	990190	990358	+	12889.8	-2.64293	0.371116	-7.12159	1.06686e-12	3.79605e-12
CP023154	992750	992904	-	2742.57	0.392336	0.290413	1.35096	0.176708	0.20999
CP023154	993465	993618	+	9547.45	0.00348592	0.330255	0.0105552	0.991578	0.993201
CP023154	995044	995216	-	1009.29	1.58878	0.814876	1.94972	0.0512089	0.0662576
CP023154	998612	998762	+	59989.5	-1.14805	0.207189	-5.54108	3.00616e-08	7.86227e-08
CP023154	1001375	1001525	-	772.782	-0.468344	0.147323	-3.17902	0.00147774	0.0023737
CP023154	1007418	1007577	+	2723.76	1.7892	0.204035	8.76912	1.80073e-18	9.33936e-18
CP023154	1013134	1013306	+	8582.89	-0.1507	0.175745	-0.857496	0.391171	0.437653
CP023154	1017450	1017641	-	3879.54	-0.881263	0.207299	-4.25117	2.12653e-05	4.19819e-05
CP023154	1019620	1019772	-	2345.65	-0.555601	0.206184	-2.69468	0.00704568	0.0103903
CP023154	1023043	1023194	-	6895.53	-2.73929	0.290232	-9.43827	3.78977e-21	2.39107e-20
CP023154	1029328	1029478	+	4946.47	-0.443084	0.321544	-1.37799	0.168206	0.201059
CP023154	1032757	1032937	+	3278.23	0.497047	0.208578	2.38303	0.0171708	0.024047
CP023154	1034574	1034728	-	4602.38	-2.09924	0.143283	-14.651	1.3278e-48	3.86958e-47
CP023154	1040019	1040169	+	10655.6	-1.11488	0.228533	-4.8784	1.0695e-06	2.43322e-06
CP023154	1041501	1041651	+	10610	-1.35879	0.319288	-4.2557	2.08397e-05	4.12747e-05
CP023154	1041785	1041936	-	5582.06	-2.2097	0.313033	-7.05899	1.67712e-12	5.89885e-12
CP023154	1048248	1048400	-	123683	3.98852	0.438401	9.09787	9.21194e-20	5.26889e-19
CP023154	1062380	1062547	+	1268.65	-0.0834159	0.300386	-0.277695	0.781246	0.810377
CP023154	1063433	1063595	+	1798.91	-0.523562	0.239483	-2.18622	0.0287997	0.0390035
CP023154	1064691	1064935	-	14638.1	1.29018	0.265346	4.86225	1.16061e-06	2.61137e-06
CP023154	1068936	1069086	+	1629.57	1.95095	0.256346	7.61062	2.72789e-14	1.07708e-13
CP023154	1071324	1071474	-	2761.23	0.827364	0.176034	4.70002	2.6014e-06	5.60583e-06
CP023154	1074477	1074627	-	30062.2	-2.8011	0.257121	-10.8941	1.22967e-27	1.15779e-26
CP023154	1074880	1075034	-	117186	-2.6211	0.435264	-6.02187	1.72418e-09	4.81825e-09
CP023154	1079301	1079495	+	16049	-3.20824	0.224664	-14.2802	2.90769e-46	7.73697e-45
CP023154	1079749	1079900	+	10000.6	-2.18824	0.282206	-7.75407	8.89967e-15	3.65543e-14
CP023154	1089397	1089674	+	1280.99	0.941713	0.314251	2.99669	0.00272928	0.00429388
CP023154	1092840	1093050	-	1531.95	0.127962	0.148845	0.859695	0.389957	0.437095
CP023154	1094536	1094686	+	759.857	2.27062	0.21885	10.3752	3.21435e-25	2.69477e-24
CP023154	1100896	1101060	+	1640.05	-1.47996	0.198772	-7.44551	9.65718e-14	3.69387e-13
CP023154	1102328	1102479	+	2865.91	-0.632153	0.167575	-3.77236	0.000161709	0.000294542
CP023154	1102523	1102673	-	1901.29	1.07727	0.277543	3.88144	0.000103838	0.000191991
CP023154	1108971	1109122	-	3338.92	1.86632	0.231883	8.04855	8.37786e-16	3.68867e-15
CP023154	1110517	1110675	+	1433.13	-0.139121	0.180163	-0.772194	0.439999	0.485188
CP023154	1114936	1115087	+	3931.53	-1.54908	0.214898	-7.20844	5.65977e-13	2.09926e-12
CP023154	1119730	1119885	-	12729.3	-1.85407	0.233839	-7.92881	2.21258e-15	9.53592e-15
CP023154	1121833	1122012	-	1681.13	1.87921	0.159992	11.7456	7.4378e-32	9.68497e-31
CP023154	1123100	1123261	+	2408.27	1.68446	0.220672	7.63329	2.28829e-14	9.09373e-14
CP023154	1124757	1124907	-	2837.13	-0.596679	0.238611	-2.50063	0.0123972	0.0177268
CP023154	1129234	1129407	+	8549.86	-3.27679	0.245269	-13.36	1.03564e-40	2.1127e-39
CP023154	1129901	1130053	+	8414.06	-2.69154	0.205191	-13.1173	2.62236e-39	4.58538e-38
CP023154	1130521	1130679	+	12058.2	-2.99087	0.269119	-11.1136	1.07777e-28	1.06386e-27
CP023154	1131093	1131247	-	1504.54	-1.16897	0.27189	-4.2994	1.71258e-05	3.45907e-05
CP023154	1134756	1134906	+	2568.16	-0.98595	0.314918	-3.13081	0.00174323	0.00279281
CP023154	1138948	1139099	-	17362.1	1.88843	0.262343	7.19835	6.0947e-13	2.22021e-12
CP023154	1139749	1139900	+	536.272	1.46988	0.211705	6.94307	3.8368e-12	1.32662e-11
CP023154	1141034	1141218	+	2142.4	-0.153494	0.214177	-0.716666	0.47358	0.514798
CP023154	1143572	1143804	+	3123.83	1.49539	0.28031	5.33479	9.5657e-08	2.40914e-07
CP023154	1156612	1156765	+	1864.2	0.523492	0.181603	2.88261	0.00394394	0.00604935
CP023154	1157144	1157294	-	2221.12	-1.32739	0.292898	-4.53192	5.845e-06	1.21259e-05
CP023154	1157503	1157683	+	1807.05	0.620441	0.130081	4.76965	1.84543e-06	4.06261e-06
CP023154	1158967	1159241	+	3316.41	0.555226	0.257496	2.15625	0.031064	0.0418748
CP023154	1161081	1161231	-	1216.54	1.60852	0.262851	6.11952	9.38587e-10	2.6717e-09
CP023154	1164306	1164462	+	5224.4	-0.217428	0.326724	-0.665478	0.505745	0.546155
CP023154	1170349	1170610	-	3166.55	0.527971	0.157065	3.36147	0.00077529	0.00128853
CP023154	1172798	1172948	+	5653.97	-1.16845	0.230774	-5.0632	4.12268e-07	9.77938e-07
CP023154	1173249	1173399	+	6084.96	-0.958658	0.377167	-2.54173	0.0110304	0.0158838
CP023154	1176028	1176179	-	1994.01	0.0188968	0.129688	0.14571	0.884151	0.900333
CP023154	1178743	1178903	-	1780.1	1.90379	0.269301	7.06939	1.55615e-12	5.50498e-12
CP023154	1179804	1179968	+	1045.47	0.932136	0.193987	4.80516	1.54631e-06	3.44124e-06
CP023154	1180353	1180534	+	9793.13	-0.761643	0.211946	-3.59358	0.00032617	0.000573609
CP023154	1185885	1186079	+	3678.11	2.45241	0.228076	10.7526	5.76051e-27	5.18446e-26
CP023154	1185976	1186126	-	6219.13	-0.966232	0.211411	-4.5704	4.8679e-06	1.02376e-05
CP023154	1186829	1186980	-	2492.87	-0.525703	0.179451	-2.92951	0.00339499	0.00526008
CP023154	1190650	1190802	+	2149.27	1.38786	0.192712	7.20171	5.94611e-13	2.19218e-12
CP023154	1193635	1193785	-	26281.5	0.29012	0.231424	1.25363	0.209977	0.247127
CP023154	1194118	1194270	+	9568.5	-0.856447	0.259196	-3.30424	0.000952337	0.00156675
CP023154	1194762	1194934	-	30224.2	-0.874767	0.309393	-2.82736	0.0046933	0.00710965
CP023154	1200587	1200742	+	803.384	-0.0838554	0.209017	-0.40119	0.68828	0.725005
CP023154	1205672	1205871	+	5298.51	-2.13296	0.273156	-7.8086	5.78278e-15	2.39126e-14
CP023154	1206625	1206775	+	4751.75	-1.44754	0.66215	-2.18612	0.0288065	0.0390035
CP023154	1206632	1206783	-	4230.83	2.03932	0.298269	6.83718	8.07693e-12	2.71598e-11
CP023154	1212806	1212956	-	2501.54	-0.327008	0.210551	-1.55311	0.120397	0.148554
CP023154	1221623	1221779	+	583.967	-0.12318	0.16023	-0.768771	0.442029	0.48655
CP023154	1222662	1222812	+	369.116	1.81672	0.241865	7.51131	5.8539e-14	2.26746e-13
CP023154	1223745	1223912	-	1213.3	-0.731857	0.242403	-3.01917	0.00253467	0.0040187
CP023154	1229344	1229497	+	1030.04	1.05383	0.208885	5.04503	4.53451e-07	1.07148e-06
CP023154	1230216	1230366	-	2108.79	1.85428	0.196916	9.41658	4.65999e-21	2.82368e-20
CP023154	1230804	1230960	-	1812.93	-0.945884	0.345147	-2.74053	0.00613408	0.00913395
CP023154	1237077	1237233	-	2981.82	-1.33432	0.242667	-5.49857	3.82888e-08	9.97137e-08
CP023154	1237100	1237259	+	1495.45	-0.605211	0.432116	-1.40058	0.161341	0.19323
CP023154	1242540	1242691	-	5901.75	2.86252	0.337305	8.48645	2.13048e-17	1.03481e-16
CP023154	1243920	1244070	-	6450.73	1.6384	0.273409	5.99251	2.06627e-09	5.73569e-09
CP023154	1245743	1245894	-	5965.41	1.71754	0.196904	8.72274	2.71553e-18	1.39656e-17
CP023154	1249522	1249686	-	12947.7	-0.858254	0.289979	-2.95971	0.00307926	0.00479519
CP023154	1250842	1251043	+	2065.9	0.502885	0.204576	2.45818	0.0139642	0.0199209
CP023154	1252113	1252267	-	2101.9	-0.279016	0.254529	-1.09621	0.272987	0.316417
CP023154	1255218	1255368	+	1096.39	0.499446	0.167245	2.98632	0.00282357	0.00440822
CP023154	1256260	1256410	+	946.654	1.8575	0.299137	6.20955	5.3137e-10	1.57101e-09
CP023154	1266795	1266945	-	1406.3	0.130291	0.3714	0.350811	0.72573	0.759225
CP023154	1268606	1268757	+	32205.4	-1.03406	0.24501	-4.22048	2.43785e-05	4.7973e-05
CP023154	1269133	1269283	+	27133.1	-1.50149	0.263982	-5.68785	1.28645e-08	3.43803e-08
CP023154	1272335	1272535	-	3746.86	0.0375182	0.200467	0.187155	0.851539	0.872935
CP023154	1274575	1274725	+	59190	-2.17524	0.338809	-6.42025	1.36054e-10	4.10174e-10
CP023154	1275288	1275438	-	9551.54	-0.419498	0.15672	-2.67673	0.00743438	0.0109109
CP023154	1283683	1283834	+	4004.26	-0.240054	0.182771	-1.31341	0.189043	0.22378
CP023154	1283838	1283989	-	2960.84	0.228584	0.166099	1.37619	0.168762	0.20133
CP023154	1285534	1285687	-	760.7	1.62793	0.666146	2.44381	0.0145331	0.0206843
CP023154	1289823	1289975	-	1926.57	0.833988	0.223768	3.72702	0.00019376	0.000348768
CP023154	1290965	1291115	+	8326.86	-2.85004	0.214507	-13.2865	2.77371e-40	5.30472e-39
CP023154	1291421	1291571	-	5326.21	0.803244	0.238997	3.36089	0.000776906	0.00128853
CP023154	1291471	1291625	+	4972.57	-0.815433	0.167644	-4.86406	1.15001e-06	2.59707e-06
CP023154	1296406	1296556	+	147179	-4.3954	0.231565	-18.9813	2.43525e-80	2.98075e-78
CP023154	1297705	1297900	+	236207	-2.48843	0.262859	-9.4668	2.88544e-21	1.85883e-20
CP023154	1304968	1305121	-	1687.25	1.45809	0.286369	5.09163	3.55e-07	8.51999e-07
CP023154	1308046	1308196	+	21225.5	1.05046	0.262304	4.00475	6.20835e-05	0.000116908
CP023154	1310949	1311102	-	1358.99	0.341856	0.277461	1.23209	0.217916	0.255978
CP023154	1317976	1318128	-	1164.71	1.43584	0.276312	5.19646	2.03124e-07	4.99244e-07
CP023154	1319480	1319630	-	1860.16	-0.29077	0.212058	-1.37118	0.170318	0.202791
CP023154	1328184	1328359	+	7375.88	-0.950535	0.197107	-4.82243	1.41823e-06	3.16773e-06
CP023154	1330245	1330401	-	2628.09	0.49415	0.278206	1.7762	0.0756999	0.0965174
CP023154	1332060	1332300	-	5712.24	0.324533	0.192747	1.68372	0.0922357	0.115201
CP023154	1333808	1333958	+	1380.6	2.03965	0.192597	10.5903	3.30704e-26	2.89129e-25
CP023154	1338713	1338863	-	1122.05	-0.0847258	0.217968	-0.388707	0.697493	0.733446
CP023154	1343885	1344035	+	3486.31	-1.03834	0.23333	-4.45009	8.5834e-06	1.75687e-05
CP023154	1345100	1345256	-	2248.91	-0.380382	0.214394	-1.77422	0.0760272	0.0967331
CP023154	1345322	1345582	+	4775.52	-0.842169	0.184522	-4.56406	5.01727e-06	1.05156e-05
CP023154	1346439	1346620	-	2884.64	-0.492386	0.180938	-2.7213	0.00650255	0.00963574
CP023154	1350152	1350302	-	1064.99	1.22332	0.246127	4.9703	6.68481e-07	1.54381e-06
CP023154	1352283	1352439	+	3446.76	-0.32038	0.183242	-1.74839	0.080396	0.101658
CP023154	1354268	1354419	+	3951.25	1.61	0.180927	8.89866	5.65249e-19	3.0345e-18
CP023154	1361569	1361719	-	7756.24	-1.6885	0.40599	-4.15897	3.19692e-05	6.1915e-05
CP023154	1363322	1363472	+	5797.61	-1.82513	0.229259	-7.961	1.70652e-15	7.40702e-15
CP023154	1364372	1364523	+	1744.26	-0.425223	0.174811	-2.43247	0.0149964	0.0212941
CP023154	1369010	1369160	+	2816.16	1.50578	0.228555	6.58828	4.44955e-11	1.40367e-10
CP023154	1374493	1374643	+	4634.48	-0.123409	0.16816	-0.733878	0.463023	0.504759
CP023154	1375369	1375519	-	5602.17	1.62548	0.287126	5.66118	1.50333e-08	3.96567e-08
CP023154	1376808	1376979	+	6292.53	0.440575	0.256349	1.71865	0.0856779	0.108113
CP023154	1381923	1382073	+	6347.85	1.29763	0.373247	3.47659	0.000507832	0.000865718
CP023154	1387568	1387718	-	1123.01	3.41791	0.355265	9.62073	6.53672e-22	4.49491e-21
CP023154	1389630	1389780	+	4774.16	0.483047	0.364197	1.32633	0.184729	0.219098
CP023154	1400400	1400573	+	3106.43	-1.84832	0.186546	-9.9081	3.83895e-23	2.90054e-22
CP023154	1402963	1403113	-	1056.99	1.48397	0.25166	5.89673	3.70786e-09	9.99653e-09
CP023154	1406786	1406949	+	1103.83	1.05273	0.390796	2.69382	0.00706378	0.0103919
CP023154	1408602	1408752	-	13112.6	0.850111	0.254499	3.34033	0.000836789	0.00138036
CP023154	1409335	1409500	-	14518.7	-2.44878	0.165728	-14.7759	2.09471e-49	6.74717e-48
CP023154	1415548	1415701	+	7181.45	-1.68268	0.16971	-9.915	3.58255e-23	2.74065e-22
CP023154	1416036	1416186	+	11782.8	-1.30129	0.334528	-3.88993	0.000100273	0.000185961
CP023154	1416259	1416556	-	16862.4	-2.03467	0.313938	-6.48111	9.1051e-11	2.7723e-10
CP023154	1417591	1417741	-	4577.08	-0.89036	0.204764	-4.34823	1.3724e-05	2.79039e-05
CP023154	1423822	1423972	+	8264.29	-2.02509	0.206573	-9.80324	1.09029e-22	7.94358e-22
CP023154	1424245	1424395	-	7866.43	-1.03194	0.23187	-4.45053	8.56599e-06	1.75687e-05
CP023154	1426482	1426632	+	2941.82	-0.29643	0.404373	-0.733062	0.463521	0.504759
CP023154	1427432	1427582	-	2621.08	0.439064	0.293662	1.49513	0.13488	0.165093
CP023154	1427842	1427992	-	6084.78	-2.23842	0.19523	-11.4656	1.96445e-30	2.26839e-29
CP023154	1431508	1431665	+	1965.64	-0.315663	0.319842	-0.986936	0.323674	0.36888
CP023154	1435572	1435731	-	3850.39	-1.95589	0.326411	-5.99212	2.07122e-09	5.73569e-09
CP023154	1436599	1436749	-	1972.79	0.0388741	0.197028	0.197302	0.843591	0.867694
CP023154	1437104	1437254	-	4501.26	-1.4624	0.318367	-4.59342	4.36032e-06	9.20177e-06
CP023154	1439683	1439833	-	10049.1	-1.57577	0.469566	-3.35581	0.000791326	0.0013089
CP023154	1447615	1447765	-	2636.55	-0.466476	0.219683	-2.1234	0.0337201	0.0450582
CP023154	1450688	1450838	-	7716.85	0.212668	0.174667	1.21756	0.22339	0.261905
CP023154	1452132	1452285	+	2877.09	2.52398	0.185056	13.6391	2.34581e-42	5.12728e-41
CP023154	1454868	1455018	+	3691.3	0.270913	0.28789	0.941028	0.346691	0.39219
CP023154	1456283	1456433	-	3035.32	0.980951	0.27438	3.57516	0.000350019	0.00061029
CP023154	1457161	1457311	-	3703.25	-1.60608	0.174631	-9.19702	3.68009e-20	2.14497e-19
CP023154	1464396	1464546	-	1572.91	-0.13261	0.179091	-0.740461	0.459021	0.502541
CP023154	1466221	1466379	-	3311.47	-0.0394801	0.218827	-0.180417	0.856825	0.876885
CP023154	1469128	1469279	+	2829.96	-0.0983385	0.225963	-0.435198	0.663419	0.701429
CP023154	1470538	1470688	-	4696.97	-1.39564	0.225683	-6.18405	6.24772e-10	1.82076e-09
CP023154	1470733	1470883	+	3588.04	0.727034	0.415642	1.74918	0.0802597	0.101658
CP023154	1476462	1476612	+	5893.2	-0.0351008	0.230464	-0.152305	0.878947	0.896526
CP023154	1477052	1477256	-	12226.3	-0.418373	0.236945	-1.76569	0.0774473	0.0983356
CP023154	1482846	1483001	-	3870.74	-2.18158	0.228208	-9.55961	1.18198e-21	7.86273e-21
CP023154	1486397	1486547	+	6813.72	0.085689	0.36073	0.237543	0.812235	0.839676
CP023154	1490263	1490459	-	4212.65	-1.30278	0.194267	-6.70614	1.99836e-11	6.54009e-11
CP023154	1491422	1491575	+	1210.34	0.488757	0.21839	2.23801	0.0252206	0.0343765
CP023154	1492887	1493040	+	1792.26	0.198267	0.254127	0.780186	0.435281	0.480852
CP023154	1493663	1493815	+	1095.99	0.619998	0.23873	2.59706	0.00940246	0.0136036
CP023154	1498102	1498382	-	5481.72	1.31664	0.209712	6.27831	3.42278e-10	1.01687e-09
CP023154	1499054	1499204	-	1197.3	1.6753	0.174603	9.59489	8.4003e-22	5.7122e-21
CP023154	1499971	1500121	+	2199.19	-0.621488	0.194414	-3.19673	0.00138995	0.00223855
CP023154	1500648	1500799	-	5964.42	-2.78316	0.166188	-16.7471	5.9491e-63	2.80065e-61
CP023154	1508015	1508176	-	2132.29	-0.768801	0.184064	-4.1768	2.95639e-05	5.76213e-05
CP023154	1508113	1508264	+	1958.63	0.857503	0.22097	3.88063	0.000104186	0.000192053
CP023154	1509069	1509220	+	3994.88	-1.32401	0.329652	-4.01639	5.90952e-05	0.000111624
CP023154	1514477	1514627	-	9947.37	2.08385	0.161405	12.9107	3.91881e-38	6.48192e-37
CP023154	1515249	1515401	+	2838.49	0.0594522	0.299273	0.198655	0.842532	0.867694
CP023154	1516651	1516802	-	10569.2	0.609712	0.254162	2.39891	0.0164439	0.0231349
CP023154	1518873	1519024	-	15094.5	-1.93749	0.358624	-5.40258	6.56899e-08	1.67509e-07
CP023154	1522368	1522538	+	1753.45	1.25664	0.197221	6.37173	1.86906e-10	5.60718e-10
CP023154	1526464	1526623	-	710.026	2.39146	0.331416	7.21587	5.35903e-13	1.99983e-12
CP023154	1533993	1534156	+	1951.9	0.74041	0.705254	1.04985	0.293788	0.336701
CP023154	1538243	1538393	+	619.055	1.84439	0.254036	7.26034	3.86122e-13	1.46774e-12
CP023154	1541047	1541197	-	28578.1	-3.61767	0.460668	-7.85308	4.05935e-15	1.70159e-14
CP023154	1545648	1545798	+	9270.11	2.57882	0.226955	11.3627	6.41236e-30	6.88484e-29
CP023154	1547052	1547226	+	6585.48	1.17104	0.273095	4.28804	1.80259e-05	3.6289e-05
CP023154	1552460	1552655	+	9015.02	-1.01674	0.311051	-3.26872	0.00108035	0.00176785
CP023154	1554326	1554476	+	6889.28	-2.42821	0.256818	-9.45499	3.23056e-21	2.05948e-20
CP023154	1554750	1554902	-	1034.25	0.535006	0.171452	3.12044	0.00180582	0.00288555
CP023154	1559081	1559232	+	2416.66	0.172658	0.191159	0.903217	0.366411	0.413733
CP023154	1560390	1560540	-	860.275	1.17527	0.366383	3.20776	0.00133771	0.00216011
CP023154	1567024	1567174	+	18417.5	-0.526236	0.255044	-2.06332	0.0390825	0.0518839
CP023154	1572941	1573091	-	10997.7	-1.96184	0.213116	-9.20549	3.4012e-20	2.00148e-19
CP023154	1574179	1574329	+	1930.89	0.573034	0.357554	1.60265	0.109012	0.135051
CP023154	1578144	1578294	-	3509.84	2.25017	0.285906	7.87032	3.53727e-15	1.50334e-14
CP023154	1578224	1578411	+	3769.12	1.02262	0.273546	3.73838	0.000185209	0.000336345
CP023154	1578478	1578656	-	3344.9	-0.587437	0.137951	-4.2583	2.05984e-05	4.09292e-05
CP023154	1579630	1579784	-	6822.53	-2.8613	0.188376	-15.1893	4.16167e-52	1.59184e-50
CP023154	1584519	1584671	+	39063.6	1.05923	0.298526	3.5482	0.000387866	0.000672448
CP023154	1591466	1591617	-	4678.05	1.68137	0.197765	8.50188	1.86545e-17	9.13323e-17
CP023154	1598135	1598291	+	2676.68	0.663944	0.323594	2.05178	0.0401909	0.053125
CP023154	1600355	1600505	+	1338.96	-0.112614	0.201314	-0.559394	0.575893	0.617244
CP023154	1600715	1600995	+	4732.01	2.72482	0.391183	6.96557	3.27077e-12	1.13734e-11
CP023154	1601789	1601941	-	61595.5	-5.45374	0.368008	-14.8196	1.0936e-49	3.71825e-48
CP023154	1608275	1608440	+	5716.56	-2.76302	0.286033	-9.65979	4.46796e-22	3.17953e-21
CP023154	1608811	1608965	+	2747.42	0.247252	0.205829	1.20125	0.229653	0.268734
CP023154	1616576	1616835	+	28711.8	1.75382	0.337965	5.18937	2.11004e-07	5.1448e-07
CP023154	1618488	1618638	-	3354.26	1.01506	0.271761	3.73513	0.000187622	0.000339717
CP023154	1619448	1619599	-	4518.29	-1.26728	0.240146	-5.27714	1.31218e-07	3.25122e-07
CP023154	1625028	1625187	+	3029.78	-0.146571	0.185195	-0.791442	0.428686	0.474423
CP023154	1627681	1627833	-	29595.8	-2.08917	0.266759	-7.83166	4.81478e-15	2.00452e-14
CP023154	1628252	1628403	+	3231.86	-1.28888	0.13788	-9.34788	8.94249e-21	5.3134e-20
CP023154	1631792	1631942	+	1424.82	-0.94921	0.337012	-2.81655	0.00485423	0.00733527
CP023154	1636591	1636788	-	5245.58	0.937182	0.209743	4.46823	7.88677e-06	1.62515e-05
CP023154	1637112	1637269	-	2028.88	1.01255	0.283016	3.57771	0.000346613	0.000606077
CP023154	1637935	1638089	-	7755.02	-0.872054	0.304166	-2.86703	0.00414339	0.0063252
CP023154	1639392	1639557	-	9377.32	-2.11079	0.202458	-10.4258	1.89016e-25	1.60663e-24
CP023154	1641371	1641522	+	7031.52	-3.0761	0.163732	-18.7874	9.56866e-79	9.76003e-77
CP023154	1652169	1652320	-	2543.49	0.630345	0.325521	1.93642	0.0528161	0.0681929
CP023154	1653214	1653389	-	6297.19	2.56527	0.272166	9.42539	4.28523e-21	2.62256e-20
CP023154	1655724	1655882	+	76104.2	0.574587	0.270434	2.12469	0.0336126	0.045013
CP023154	1658796	1658948	-	5781.56	-1.42856	0.319349	-4.47335	7.70037e-06	1.5921e-05
CP023154	1662526	1662678	+	2209.07	1.5138	0.371534	4.07446	4.61206e-05	8.79308e-05
CP023154	1662948	1663128	-	3336.44	2.05401	0.266721	7.70097	1.35035e-14	5.47293e-14
CP023154	1663481	1663638	-	4552.11	0.0315752	0.315276	0.100151	0.920224	0.932413
CP023154	1673282	1673432	+	1992.59	-1.10634	0.268366	-4.12248	3.74813e-05	7.21338e-05
CP023154	1674042	1674196	-	843.696	0.568983	0.190298	2.98996	0.00279018	0.00436724
CP023154	1675603	1675889	-	5842.36	-1.34651	0.203478	-6.61748	3.65376e-11	1.1769e-10
CP023154	1681958	1682117	+	35818.9	-3.48365	0.203154	-17.1478	6.52429e-66	3.99287e-64
CP023154	1682517	1682777	+	29209	-1.95445	0.270126	-7.23533	4.64382e-13	1.74357e-12
CP023154	1682539	1682689	-	2438.35	7.16112	0.398461	17.972	3.23034e-72	2.47121e-70
CP023154	1683622	1683806	-	3865.95	-0.713365	0.207704	-3.43453	0.000593591	0.00100077
CP023154	1688042	1688194	-	5271.81	-0.527036	0.149039	-3.53622	0.000405895	0.000701716
CP023154	1688905	1689056	-	4436.72	-0.915421	0.197302	-4.63969	3.48938e-06	7.41492e-06
CP023154	1691918	1692069	-	2218.38	-0.0937063	0.337251	-0.277853	0.781125	0.810377
CP023154	1695900	1696053	+	5360.55	-1.24224	0.328449	-3.78215	0.00015548	0.000284041
CP023154	1697914	1698064	+	5537.42	-2.06521	0.170183	-12.1352	6.87038e-34	9.55607e-33
CP023154	1699778	1699928	-	290286	1.74139	0.258616	6.7335	1.65631e-11	5.44979e-11
CP023154	1706343	1706505	+	1402.43	-1.18146	0.19956	-5.92033	3.21289e-09	8.73907e-09
CP023154	1712104	1712292	+	12372.2	0.630706	0.44371	1.42144	0.15519	0.186594
CP023154	1714310	1714461	+	8079.86	-1.25559	0.389615	-3.22264	0.00127014	0.00205641
CP023154	1715502	1715793	-	4728.8	-0.101624	0.225211	-0.45124	0.651817	0.691355
CP023154	1716055	1716205	-	7918.86	-2.23345	0.325456	-6.86254	6.76471e-12	2.28729e-11
CP023154	1716610	1716763	-	1035.33	1.10274	0.178299	6.18475	6.22005e-10	1.82076e-09
CP023154	1725996	1726146	+	4668.85	0.0769266	0.219103	0.351098	0.725515	0.759225
CP023154	1726362	1726561	+	29983.1	-0.297831	0.284606	-1.04647	0.295345	0.337853
CP023154	1726548	1726699	-	158915	0.140437	0.340322	0.41266	0.679856	0.717365
CP023154	1731579	1731729	+	2072.07	-1.16695	0.188974	-6.17517	6.60936e-10	1.91703e-09
CP023154	1732860	1733025	+	1967.91	0.288624	0.189026	1.5269	0.126787	0.155811
CP023154	1735558	1735708	+	1766.28	-0.0238073	0.178115	-0.133663	0.893669	0.908514
CP023154	1736851	1737008	-	801.065	-0.230682	0.238138	-0.96869	0.3327	0.378462
CP023154	1737411	1737562	-	1791.67	-1.33461	0.168806	-7.90616	2.65451e-15	1.13606e-14
CP023154	1742554	1742704	-	4152.74	-1.19473	0.226167	-5.28251	1.27427e-07	3.17014e-07
CP023154	1743135	1743285	-	3246.02	-2.38192	0.178425	-13.3497	1.1887e-40	2.34672e-39
CP023154	1746765	1746915	+	3740.5	-0.332475	0.295544	-1.12496	0.260605	0.303214
CP023154	1748571	1748721	+	4541.04	0.683227	0.269907	2.53134	0.0113628	0.016324
CP023154	1749697	1749961	-	26702.8	-1.65092	0.231692	-7.12549	1.03708e-12	3.71164e-12
CP023154	1752544	1752694	+	4442.98	-1.32694	0.192268	-6.90151	5.14538e-12	1.7592e-11
CP023154	1755968	1756255	-	40863.6	1.03838	0.301128	3.4483	0.000564133	0.00095637
CP023154	1757005	1757209	-	29024.4	-2.05678	0.208465	-9.86629	5.82832e-23	4.34991e-22
CP023154	1759822	1759973	+	1085.11	-0.314857	0.156869	-2.00713	0.0447354	0.0586255
CP023154	1765411	1765562	+	5858.76	-3.03762	0.362784	-8.3731	5.61235e-17	2.64212e-16
CP023154	1769917	1770067	-	1127.67	1.92182	0.199429	9.63663	5.59956e-22	3.939e-21
CP023154	1772421	1772624	+	42890.1	-0.999451	0.415222	-2.40703	0.0160829	0.0227841
CP023154	1774154	1774310	+	12841.4	-1.78512	0.215959	-8.26604	1.38483e-16	6.37231e-16
CP023154	1779817	1779990	-	6978.44	-0.840751	0.168374	-4.99335	5.93422e-07	1.38616e-06
CP023154	1779934	1780084	+	8073.15	-1.07474	0.332508	-3.23222	0.00122832	0.00199399
CP023154	1781511	1781661	+	12213.7	-1.3263	0.168547	-7.86903	3.57393e-15	1.50844e-14
CP023154	1789346	1789496	+	10344.9	0.519536	0.190261	2.73065	0.00632087	0.00938926
CP023154	1789655	1789806	-	7125.15	0.305641	0.213827	1.42939	0.152893	0.184558
CP023154	1790335	1790485	-	4531.2	-2.44791	0.185659	-13.185	1.0709e-39	1.92763e-38
CP023154	1792254	1792405	+	21813.4	1.07764	0.213663	5.04366	4.56712e-07	1.07503e-06
CP023154	1796920	1797070	-	1068.25	0.0448976	0.686304	0.0654195	0.94784	0.957225
CP023154	1796980	1797131	+	5399.31	-1.47613	0.310487	-4.75425	1.99184e-06	4.3536e-06
CP023154	1798373	1798529	-	3705.02	-1.38134	0.259538	-5.32231	1.02456e-07	2.56979e-07
CP023154	1808742	1808896	-	12633.3	-3.69047	0.184601	-19.9916	6.52219e-89	1.33053e-86
CP023154	1809631	1809781	+	18010.9	-3.48219	0.286843	-12.1397	6.50689e-34	9.26098e-33
CP023154	1810495	1810647	+	8457.91	-1.28792	0.190138	-6.77362	1.25602e-11	4.17762e-11
CP023154	1810685	1810840	-	1692.69	-0.555939	0.272949	-2.03679	0.0416715	0.0549633
CP023154	1816154	1816305	+	5808.98	-2.45592	0.207254	-11.8498	2.1567e-32	2.93311e-31
CP023154	1828084	1828240	+	9005.29	0.325581	0.295542	1.10164	0.270619	0.314267
CP023154	1832265	1832416	-	6000.03	-0.680004	0.32982	-2.06174	0.039232	0.0519697
CP023154	1842834	1843025	+	1024.61	0.412907	0.387409	1.06581	0.286507	0.329591
CP023154	1844000	1844151	+	1456.71	0.142982	0.134899	1.05991	0.289184	0.332047
CP023154	1845690	1845843	+	1546.66	-0.153652	0.173371	-0.886262	0.375476	0.422411
CP023154	1851171	1851323	-	1882.61	3.06219	0.18147	16.8743	6.94952e-64	3.54425e-62
CP023154	1851513	1851663	-	1383.36	0.173777	0.329964	0.526654	0.598434	0.639165
CP023154	1852714	1852864	+	1161.74	-0.556637	0.194156	-2.86695	0.00414445	0.0063252
CP023154	1854302	1854455	+	1283.39	3.88248	0.221352	17.5399	7.10769e-69	4.83323e-67
CP023154	1857044	1857198	+	850.773	-0.250782	0.169173	-1.4824	0.138234	0.168189
CP023154	1860043	1860193	-	5606.45	1.55788	0.236176	6.59628	4.21607e-11	1.33691e-10
CP023154	1862409	1862559	-	9880.29	-0.706089	0.380003	-1.85812	0.0631526	0.0813671
CP023154	1867440	1867594	-	23503.6	1.28935	0.275045	4.68779	2.76175e-06	5.9305e-06
CP023154	1872130	1872280	-	4256.56	0.816878	0.306326	2.6667	0.00766006	0.0112152
CP023154	1879099	1879272	+	9774.29	-0.151519	0.460376	-0.329121	0.742064	0.774989
CP023154	1879369	1879519	-	13920.4	0.92379	0.280801	3.28984	0.00100244	0.00164476
CP023154	1880071	1880221	+	5430.39	-2.59067	0.247059	-10.4861	1.00114e-25	8.62956e-25
CP023154	1880567	1880757	+	3845.66	0.583193	0.169972	3.43112	0.000601101	0.00101064
CP023154	1883734	1883885	-	74386.4	-2.95519	0.270219	-10.9363	7.73047e-28	7.39226e-27
CP023154	1886022	1886172	+	1299.76	1.45398	0.222428	6.53689	6.28119e-11	1.95131e-10
CP023154	1888882	1889058	-	1783.79	-0.574028	0.215841	-2.6595	0.00782563	0.0114031
CP023154	1888957	1889129	+	4674.73	4.46257	0.654883	6.81429	9.47295e-12	3.168e-11
CP023154	1889259	1889411	-	800.5	2.3644	0.250655	9.43285	3.99083e-21	2.49223e-20

## Sheet: Annogesic
Table S1. Overlapping regions in the Pyrococcus furiosus genome of SmAP1 binding sites and features mRNA, pseudogene, pseudogenic exon, sORF, rRNA tRNA, crRNA, ncRNA, transcript, 5UTR, 3UTR derived via the Annogesic pipeline (Grünerber et al., 2019).
SmAP1 binding site						Features located sense						Features located antisense
Chrom	Start	End	Name	Score	Strand	Chrom2	Start2	End2	Name2	Score2	Strand2	Chrom3	Start3	End3	Name3	Score3	Strand3
CP023154	517	670	1	0	-	.	.	.	.	.	.	CP023154	0	1263	mRNA	0	+
CP023154	1324	1479	2	0	-	.	.	.	.	.	.	CP023154	1262	3104	mRNA	0	+
CP023154	11421	11706	3	0	+	CP023154	10855	14383	CRISPR	0	+	.	.	.	.	.	.
CP023154	14503	14653	4	0	-	CP023154	14553	14748	transcript	0	-	.	.	.	.	.	.
CP023154	14503	14653	4	0	-	CP023154	14576	15917	mRNA	0	-	.	.	.	.	.	.
CP023154	25636	25794	5	0	-	.	.	.	.	.	.	CP023154	24873	25842	mRNA	0	+
CP023154	36094	36244	6	0	-	CP023154	35524	36910	mRNA	0	-	.	.	.	.	.	.
CP023154	36094	36244	6	0	-	CP023154	35620	37908	transcript	0	-	.	.	.	.	.	.
CP023154	41102	41252	7	0	-	CP023154	41224	41512	mRNA	0	-	.	.	.	.	.	.
CP023154	41102	41252	7	0	-	CP023154	41176	41225	3UTR	0	-	.	.	.	.	.	.
CP023154	41102	41252	7	0	-	CP023154	41176	41555	transcript	0	-	.	.	.	.	.	.
CP023154	48273	48424	8	0	+	.	.	.	.	.	.	CP023154	48195	49254	mRNA	0	-
CP023154	61597	61747	9	0	+	.	.	.	.	.	.	.	.	.	.	.	.
CP023154	79862	80032	10	0	-	.	.	.	.	.	.	CP023154	79323	80325	mRNA	0	+
CP023154	89135	89285	11	0	+	CP023154	87961	89143	mRNA	0	+	.	.	.	.	.	.
CP023154	102997	103151	12	0	-	CP023154	102910	104292	transcript	0	-	.	.	.	.	.	.
CP023154	102997	103151	12	0	-	CP023154	102910	103073	3UTR	0	-	.	.	.	.	.	.
CP023154	102997	103151	12	0	-	CP023154	103072	104263	mRNA	0	-	.	.	.	.	.	.
CP023154	107237	107387	13	0	-	CP023154	107266	108892	mRNA	0	-	.	.	.	.	.	.
CP023154	107237	107387	13	0	-	CP023154	106318	107266	mRNA	0	-	.	.	.	.	.	.
CP023154	107237	107387	13	0	-	CP023154	106465	108942	transcript	0	-	.	.	.	.	.	.
CP023154	118288	118472	14	0	-	.	.	.	.	.	.	CP023154	118266	118779	mRNA	0	+
CP023154	138919	139099	15	0	-	CP023154	139016	139607	mRNA	0	-	CP023154	138405	139020	mRNA	0	+
CP023154	138919	139099	15	0	-	CP023154	138963	139017	3UTR	0	-	.	.	.	.	.	.
CP023154	138919	139099	15	0	-	CP023154	138963	140258	transcript	0	-	.	.	.	.	.	.
CP023154	171668	171851	16	0	+	CP023154	169860	171852	mRNA	0	+	.	.	.	.	.	.
CP023154	171668	171851	16	0	+	CP023154	171251	171831	transcript	0	+	.	.	.	.	.	.
CP023154	172186	172361	17	0	+	CP023154	171853	172333	mRNA	0	+	.	.	.	.	.	.
CP023154	172186	172361	17	0	+	CP023154	171995	172360	transcript	0	+	.	.	.	.	.	.
CP023154	193801	193954	18	0	-	.	.	.	.	.	.	CP023154	193330	194002	mRNA	0	+
CP023154	193801	193954	18	0	-	CP023154	193883	193937	transcript	0	-	.	.	.	.	.	.
CP023154	196200	196378	19	0	-	.	.	.	.	.	.	CP023154	194110	196225	mRNA	0	+
CP023154	203813	203964	20	0	-	.	.	.	.	.	.	CP023154	203071	204181	mRNA	0	+
CP023154	204247	204413	21	0	-	.	.	.	.	.	.	CP023154	204177	205686	mRNA	0	+
CP023154	204247	204413	21	0	-	CP023154	204293	204368	transcript	0	-	.	.	.	.	.	.
CP023154	204859	205010	22	0	-	.	.	.	.	.	.	CP023154	204177	205686	mRNA	0	+
CP023154	222408	222561	23	0	-	.	.	.	.	.	.	CP023154	222203	222992	mRNA	0	+
CP023154	229231	229385	24	0	+	CP023154	227915	229313	mRNA	0	+	CP023154	229298	230372	mRNA	0	-
CP023154	229231	229385	24	0	+	CP023154	227901	229321	transcript	0	+	CP023154	229283	230344	transcript	0	-
CP023154	229231	229385	24	0	+	CP023154	229312	229321	3UTR	0	+	.	.	.	.	.	.
CP023154	230216	230366	25	0	-	CP023154	229283	230344	transcript	0	-	.	.	.	.	.	.
CP023154	230216	230366	25	0	-	CP023154	229298	230372	mRNA	0	-	.	.	.	.	.	.
CP023154	231624	231774	26	0	-	CP023154	231683	232523	mRNA	0	-	.	.	.	.	.	.
CP023154	239687	239881	27	0	+	CP023154	239515	239827	mRNA	0	+	CP023154	239819	240749	mRNA	0	-
CP023154	239687	239881	27	0	+	CP023154	239826	239844	3UTR	0	+	CP023154	239797	239820	3UTR	0	-
CP023154	239687	239881	27	0	+	CP023154	239507	239844	transcript	0	+	CP023154	239797	240757	transcript	0	-
CP023154	259060	259210	28	0	+	CP023154	257931	259119	mRNA	0	+	.	.	.	.	.	.
CP023154	259060	259210	28	0	+	CP023154	257921	259170	transcript	0	+	.	.	.	.	.	.
CP023154	259060	259210	28	0	+	CP023154	259118	259170	3UTR	0	+	.	.	.	.	.	.
CP023154	259546	259696	29	0	-	.	.	.	.	.	.	.	.	.	.	.	.
CP023154	259546	259696	29	0	-	CP023154	259608	259675	transcript	0	-	CP023154	259604	259841	transcript	0	+
CP023154	265250	265405	30	0	+	.	.	.	.	.	.	CP023154	265229	265691	mRNA	0	-
CP023154	295791	295945	31	0	+	CP023154	295439	297033	CRISPR	0	+	.	.	.	.	.	.
CP023154	304306	304473	32	0	-	CP023154	304424	305006	mRNA	0	-	.	.	.	.	.	.
CP023154	304306	304473	32	0	-	CP023154	304394	304426	transcript	0	-	.	.	.	.	.	.
CP023154	325111	325261	33	0	-	.	.	.	.	.	.	CP023154	324408	325332	mRNA	0	+
CP023154	325111	325261	33	0	-	CP023154	325173	325249	transcript	0	-	.	.	.	.	.	.
CP023154	328320	328612	34	0	+	.	.	.	.	.	.	CP023154	327249	328956	mRNA	0	-
CP023154	328320	328612	34	0	+	.	.	.	.	.	.	CP023154	327742	330119	transcript	0	-
CP023154	335501	335651	35	0	-	CP023154	335505	336222	transcript	0	-	.	.	.	.	.	.
CP023154	335501	335651	35	0	-	CP023154	335553	336192	mRNA	0	-	.	.	.	.	.	.
CP023154	335501	335651	35	0	-	CP023154	335505	335554	3UTR	0	-	.	.	.	.	.	.
CP023154	346413	346563	36	0	+	CP023154	346247	347156	mRNA	0	+	CP023154	346552	346580	transcript	0	-
CP023154	347138	347290	37	0	+	CP023154	346247	347156	mRNA	0	+	CP023154	347152	347491	mRNA	0	-
CP023154	347138	347290	37	0	+	CP023154	346247	347156	mRNA	0	+	CP023154	347127	347198	transcript	0	-
CP023154	351151	351301	38	0	-	CP023154	351234	351963	mRNA	0	-	.	.	.	.	.	.
CP023154	351151	351301	38	0	-	CP023154	351196	351235	3UTR	0	-	.	.	.	.	.	.
CP023154	351151	351301	38	0	-	CP023154	351196	351974	transcript	0	-	.	.	.	.	.	.
CP023154	358171	358324	39	0	-	CP023154	358195	358246	sORF	0	-	.	.	.	.	.	.
CP023154	358171	358324	39	0	-	CP023154	358203	358281	ncRNA	0	-	.	.	.	.	.	.
CP023154	358171	358324	39	0	-	CP023154	358203	358284	transcript	0	-	.	.	.	.	.	.
CP023154	379601	379760	40	0	-	.	.	.	.	.	.	.	.	.	.	.	.
CP023154	379601	379760	40	0	-	CP023154	379657	379705	transcript	0	-	.	.	.	.	.	.
CP023154	384337	384487	41	0	+	CP023154	383191	384445	mRNA	0	+	.	.	.	.	.	.
CP023154	385327	385477	42	0	+	.	.	.	.	.	.	CP023154	385224	386121	mRNA	0	-
CP023154	385327	385477	42	0	+	.	.	.	.	.	.	CP023154	385309	385739	transcript	0	-
CP023154	391999	392149	43	0	-	CP023154	392046	392997	mRNA	0	-	.	.	.	.	.	.
CP023154	391999	392149	43	0	-	CP023154	392031	392971	transcript	0	-	.	.	.	.	.	.
CP023154	393184	393335	44	0	+	.	.	.	.	.	.	CP023154	393002	393518	mRNA	0	-
CP023154	399342	399492	45	0	+	CP023154	399316	399559	mRNA	0	+	.	.	.	.	.	.
CP023154	403842	403992	46	0	-	CP023154	403912	405100	mRNA	0	-	CP023154	403468	403954	mRNA	0	+
CP023154	403842	403992	46	0	-	CP023154	403874	404867	transcript	0	-	.	.	.	.	.	.
CP023154	406959	407110	47	0	-	CP023154	405914	407114	mRNA	0	-	.	.	.	.	.	.
CP023154	406959	407110	47	0	-	CP023154	406298	407108	transcript	0	-	.	.	.	.	.	.
CP023154	423838	424124	48	0	+	CP023154	423151	423973	mRNA	0	+	.	.	.	.	.	.
CP023154	424667	424828	49	0	+	CP023154	424490	424808	mRNA	0	+	.	.	.	.	.	.
CP023154	429194	429349	50	0	+	.	.	.	.	.	.	CP023154	428680	429979	mRNA	0	-
CP023154	429194	429349	50	0	+	.	.	.	.	.	.	CP023154	428644	429879	transcript	0	-
CP023154	441725	441887	51	0	+	CP023154	440514	441780	mRNA	0	+	CP023154	441768	443100	mRNA	0	-
CP023154	441725	441887	51	0	+	CP023154	440514	441780	mRNA	0	+	CP023154	441722	442749	transcript	0	-
CP023154	441910	442060	52	0	-	CP023154	441768	443100	mRNA	0	-	.	.	.	.	.	.
CP023154	441910	442060	52	0	-	CP023154	441722	442749	transcript	0	-	.	.	.	.	.	.
CP023154	447911	448062	53	0	-	CP023154	448005	449325	mRNA	0	-	CP023154	447130	448009	mRNA	0	+
CP023154	447911	448062	53	0	-	CP023154	447974	449364	transcript	0	-	.	.	.	.	.	.
CP023154	447911	448062	53	0	-	CP023154	447974	448006	3UTR	0	-	.	.	.	.	.	.
CP023154	448900	449053	54	0	-	CP023154	447974	449364	transcript	0	-	.	.	.	.	.	.
CP023154	448900	449053	54	0	-	CP023154	448005	449325	mRNA	0	-	.	.	.	.	.	.
CP023154	450816	450973	55	0	+	.	.	.	.	.	.	CP023154	450184	451768	mRNA	0	-
CP023154	450816	450973	55	0	+	.	.	.	.	.	.	CP023154	450143	451780	transcript	0	-
CP023154	455359	455510	56	0	-	CP023154	455506	456073	mRNA	0	-	.	.	.	.	.	.
CP023154	455359	455510	56	0	-	CP023154	454929	455496	mRNA	0	-	.	.	.	.	.	.
CP023154	455359	455510	56	0	-	CP023154	455404	455461	transcript	0	-	.	.	.	.	.	.
CP023154	510559	510709	57	0	-	CP023154	508840	510868	mRNA	0	-	.	.	.	.	.	.
CP023154	510559	510709	57	0	-	CP023154	510604	510705	transcript	0	-	.	.	.	.	.	.
CP023154	512327	512490	58	0	-	CP023154	510873	512976	mRNA	0	-	.	.	.	.	.	.
CP023154	512327	512490	58	0	-	CP023154	510939	512741	transcript	0	-	.	.	.	.	.	.
CP023154	516120	516320	59	0	-	CP023154	516166	517720	mRNA	0	-	.	.	.	.	.	.
CP023154	516120	516320	59	0	-	CP023154	516216	517744	transcript	0	-	.	.	.	.	.	.
CP023154	519154	519306	60	0	+	CP023154	519055	520000	mRNA	0	+	.	.	.	.	.	.
CP023154	522429	522586	61	0	-	CP023154	521633	522824	mRNA	0	-	.	.	.	.	.	.
CP023154	522429	522586	61	0	-	CP023154	521694	522561	transcript	0	-	.	.	.	.	.	.
CP023154	526537	526687	62	0	-	.	.	.	.	.	.	CP023154	526551	527328	mRNA	0	+
CP023154	526537	526687	62	0	-	CP023154	526612	526690	transcript	0	-	.	.	.	.	.	.
CP023154	533922	534073	63	0	+	CP023154	533438	534047	mRNA	0	+	.	.	.	.	.	.
CP023154	533922	534073	63	0	+	CP023154	534046	534068	3UTR	0	+	.	.	.	.	.	.
CP023154	533922	534073	63	0	+	CP023154	531737	534068	transcript	0	+	.	.	.	.	.	.
CP023154	538318	538472	64	0	-	CP023154	538446	538524	tRNA	0	-	.	.	.	.	.	.
CP023154	538318	538472	64	0	-	CP023154	538414	538530	transcript	0	-	.	.	.	.	.	.
CP023154	545678	545828	65	0	+	.	.	.	.	.	.	CP023154	545573	545867	mRNA	0	-
CP023154	545678	545828	65	0	+	.	.	.	.	.	.	CP023154	545710	546919	transcript	0	-
CP023154	545678	545828	65	0	+	.	.	.	.	.	.	CP023154	545826	547119	mRNA	0	-
CP023154	555922	556083	66	0	-	CP023154	555948	556731	mRNA	0	-	.	.	.	.	.	.
CP023154	555922	556083	66	0	-	CP023154	555933	555949	3UTR	0	-	.	.	.	.	.	.
CP023154	555922	556083	66	0	-	CP023154	555933	556742	transcript	0	-	.	.	.	.	.	.
CP023154	561487	561640	67	0	+	CP023154	561252	561756	mRNA	0	+	.	.	.	.	.	.
CP023154	561487	561640	67	0	+	CP023154	561495	561750	transcript	0	+	.	.	.	.	.	.
CP023154	577540	577695	68	0	+	.	.	.	.	.	.	CP023154	577599	577842	pseudogene	0	-
CP023154	617375	617535	69	0	+	CP023154	616326	617454	mRNA	0	+	.	.	.	.	.	.
CP023154	621725	621901	70	0	-	CP023154	621772	622273	mRNA	0	-	CP023154	620920	621772	mRNA	0	+
CP023154	621725	621901	70	0	-	CP023154	621769	621987	transcript	0	-	.	.	.	.	.	.
CP023154	625551	625701	71	0	-	CP023154	625669	625849	mRNA	0	-	CP023154	625004	625673	mRNA	0	+
CP023154	625551	625701	71	0	-	CP023154	625597	625626	transcript	0	-	.	.	.	.	.	.
CP023154	640944	641097	72	0	+	.	.	.	.	.	.	CP023154	641065	641416	mRNA	0	-
CP023154	640944	641097	72	0	+	.	.	.	.	.	.	CP023154	640994	641066	3UTR	0	-
CP023154	640944	641097	72	0	+	.	.	.	.	.	.	CP023154	640994	641416	transcript	0	-
CP023154	644565	644715	73	0	+	CP023154	644251	644719	mRNA	0	+	.	.	.	.	.	.
CP023154	661279	661461	74	0	+	CP023154	660860	661793	mRNA	0	+	.	.	.	.	.	.
CP023154	661279	661461	74	0	+	CP023154	661100	661572	transcript	0	+	.	.	.	.	.	.
CP023154	678304	678457	75	0	+	CP023154	678222	681278	CRISPR	0	+	.	.	.	.	.	.
CP023154	703171	703321	76	0	+	CP023154	702698	703268	mRNA	0	+	.	.	.	.	.	.
CP023154	703171	703321	76	0	+	CP023154	703267	703321	3UTR	0	+	.	.	.	.	.	.
CP023154	703171	703321	76	0	+	CP023154	702686	703321	transcript	0	+	.	.	.	.	.	.
CP023154	711933	712086	77	0	+	.	.	.	.	.	.	CP023154	711882	712998	mRNA	0	-
CP023154	716898	717049	78	0	+	CP023154	716881	717623	pseudogene	0	+	.	.	.	.	.	.
CP023154	721517	721671	79	0	+	CP023154	721126	721651	mRNA	0	+	.	.	.	.	.	.
CP023154	744117	744268	80	0	+	.	.	.	.	.	.	CP023154	743763	744660	mRNA	0	-
CP023154	758485	758637	81	0	-	CP023154	757457	759218	mRNA	0	-	.	.	.	.	.	.
CP023154	758485	758637	81	0	-	CP023154	757013	760164	transcript	0	-	.	.	.	.	.	.
CP023154	765966	766122	82	0	+	.	.	.	.	.	.	CP023154	765067	766111	mRNA	0	-
CP023154	765966	766122	82	0	+	.	.	.	.	.	.	CP023154	762239	767378	transcript	0	-
CP023154	795085	795235	83	0	+	CP023154	794889	795586	pseudogenic_exon	0	+	.	.	.	.	.	.
CP023154	795085	795235	83	0	+	CP023154	795140	795175	transcript	0	+	.	.	.	.	.	.
CP023154	799522	799672	84	0	-	CP023154	799584	801423	mRNA	0	-	CP023154	798803	799607	mRNA	0	+
CP023154	811034	811343	85	0	-	CP023154	810901	811792	mRNA	0	-	.	.	.	.	.	.
CP023154	811034	811343	85	0	-	CP023154	811088	811802	transcript	0	-	.	.	.	.	.	.
CP023154	816212	816362	86	0	-	CP023154	816315	817074	mRNA	0	-	.	.	.	.	.	.
CP023154	819045	819195	87	0	+	CP023154	817919	819278	mRNA	0	+	.	.	.	.	.	.
CP023154	819045	819195	87	0	+	CP023154	818647	819109	transcript	0	+	.	.	.	.	.	.
CP023154	837296	837456	88	0	-	CP023154	836365	837409	mRNA	0	-	.	.	.	.	.	.
CP023154	837296	837456	88	0	-	CP023154	834474	837835	transcript	0	-	.	.	.	.	.	.
CP023154	840587	840741	89	0	+	CP023154	839771	840695	mRNA	0	+	.	.	.	.	.	.
CP023154	843855	844005	90	0	-	.	.	.	.	.	.	CP023154	842910	845814	mRNA	0	+
CP023154	843855	844005	90	0	-	.	.	.	.	.	.	CP023154	843589	845732	transcript	0	+
CP023154	849959	850175	91	0	+	CP023154	848816	850103	mRNA	0	+	CP023154	850099	850720	mRNA	0	-
CP023154	849959	850175	91	0	+	CP023154	850102	850142	3UTR	0	+	.	.	.	.	.	.
CP023154	849959	850175	91	0	+	CP023154	847229	850142	transcript	0	+	CP023154	850005	850383	transcript	0	-
CP023154	872336	872489	92	0	-	CP023154	872022	872505	mRNA	0	-	.	.	.	.	.	.
CP023154	872336	872489	92	0	-	CP023154	872398	872472	transcript	0	-	.	.	.	.	.	.
CP023154	876865	877015	93	0	-	CP023154	876937	877423	mRNA	0	-	CP023154	876252	876948	mRNA	0	+
CP023154	876865	877015	93	0	-	CP023154	876921	876938	3UTR	0	-	.	.	.	.	.	.
CP023154	876865	877015	93	0	-	CP023154	876921	877435	transcript	0	-	.	.	.	.	.	.
CP023154	890727	890880	94	0	-	.	.	.	.	.	.	CP023154	889233	890889	mRNA	0	+
CP023154	894362	894512	95	0	+	CP023154	894298	894826	transcript	0	+	.	.	.	.	.	.
CP023154	894362	894512	95	0	+	CP023154	894318	895050	mRNA	0	+	.	.	.	.	.	.
CP023154	903676	903826	96	0	+	.	.	.	.	.	.	CP023154	903733	904252	mRNA	0	-
CP023154	903676	903826	96	0	+	.	.	.	.	.	.	CP023154	903800	904263	transcript	0	-
CP023154	903676	903826	96	0	+	.	.	.	.	.	.	CP023154	903678	903730	transcript	0	-
CP023154	907612	907762	97	0	-	CP023154	907665	908661	mRNA	0	-	.	.	.	.	.	.
CP023154	907612	907762	97	0	-	CP023154	907600	907617	5UTR	0	-	.	.	.	.	.	.
CP023154	907612	907762	97	0	-	CP023154	906861	909775	transcript	0	-	.	.	.	.	.	.
CP023154	923173	923323	98	0	-	.	.	.	.	.	.	CP023154	923031	923655	mRNA	0	+
CP023154	940237	940393	99	0	+	.	.	.	.	.	.	CP023154	940063	941095	mRNA	0	-
CP023154	940237	940393	99	0	+	.	.	.	.	.	.	CP023154	940176	941120	transcript	0	-
CP023154	942303	942454	100	0	+	CP023154	941224	942322	mRNA	0	+	.	.	.	.	.	.
CP023154	948758	948916	101	0	+	CP023154	948406	949000	mRNA	0	+	.	.	.	.	.	.
CP023154	952664	952815	102	0	+	.	.	.	.	.	.	CP023154	952452	953013	mRNA	0	-
CP023154	952664	952815	102	0	+	.	.	.	.	.	.	CP023154	952675	952707	transcript	0	-
CP023154	956945	957147	103	0	+	CP023154	956905	957037	transcript	0	+	.	.	.	.	.	.
CP023154	956945	957147	103	0	+	CP023154	957018	957672	mRNA	0	+	.	.	.	.	.	.
CP023154	957500	957651	104	0	-	.	.	.	.	.	.	CP023154	957018	957672	mRNA	0	+
CP023154	959542	959693	105	0	-	CP023154	959661	959889	mRNA	0	-	CP023154	958986	959655	mRNA	0	+
CP023154	959542	959693	105	0	-	CP023154	959625	959662	3UTR	0	-	.	.	.	.	.	.
CP023154	959542	959693	105	0	-	CP023154	959625	959900	transcript	0	-	CP023154	959023	959556	transcript	0	+
CP023154	961982	962134	106	0	+	CP023154	960789	962223	mRNA	0	+	.	.	.	.	.	.
CP023154	961982	962134	106	0	+	CP023154	960902	962112	transcript	0	+	.	.	.	.	.	.
CP023154	962899	963051	107	0	-	CP023154	962219	963278	mRNA	0	-	.	.	.	.	.	.
CP023154	969200	969356	108	0	-	.	.	.	.	.	.	CP023154	967835	970010	mRNA	0	+
CP023154	969200	969356	108	0	-	.	.	.	.	.	.	CP023154	967967	969916	transcript	0	+
CP023154	973709	973859	109	0	+	CP023154	973383	973746	mRNA	0	+	.	.	.	.	.	.
CP023154	974005	974160	110	0	-	CP023154	974050	974668	mRNA	0	-	CP023154	973843	974062	mRNA	0	+
CP023154	974005	974160	110	0	-	CP023154	973934	974051	3UTR	0	-	CP023154	974061	974100	3UTR	0	+
CP023154	974005	974160	110	0	-	CP023154	973934	974680	transcript	0	-	CP023154	973833	974100	transcript	0	+
CP023154	974010	974176	111	0	+	CP023154	973843	974062	mRNA	0	+	.	.	.	.	.	.
CP023154	974010	974176	111	0	+	CP023154	974061	974100	3UTR	0	+	.	.	.	.	.	.
CP023154	974010	974176	111	0	+	CP023154	973833	974100	transcript	0	+	.	.	.	.	.	.
CP023154	979586	979736	112	0	-	CP023154	979690	980137	mRNA	0	-	CP023154	978467	979688	mRNA	0	+
CP023154	979586	979736	112	0	-	CP023154	979654	979691	3UTR	0	-	.	.	.	.	.	.
CP023154	979586	979736	112	0	-	CP023154	979654	980147	transcript	0	-	CP023154	978478	979670	transcript	0	+
CP023154	1007418	1007577	113	0	+	CP023154	1006873	1007518	mRNA	0	+	.	.	.	.	.	.
CP023154	1007418	1007577	113	0	+	.	.	.	.	.	.	CP023154	1007434	1007503	transcript	0	-
CP023154	1048248	1048400	114	0	-	CP023154	1046371	1048873	CRISPR	0	-	.	.	.	.	.	.
CP023154	1048248	1048400	114	0	-	CP023154	1047814	1048902	transcript	0	-	.	.	.	.	.	.
CP023154	1064691	1064935	115	0	-	CP023154	1064797	1065592	mRNA	0	-	.	.	.	.	.	.
CP023154	1064691	1064935	115	0	-	CP023154	1064793	1064798	3UTR	0	-	.	.	.	.	.	.
CP023154	1064691	1064935	115	0	-	CP023154	1064743	1064774	transcript	0	-	.	.	.	.	.	.
CP023154	1064691	1064935	115	0	-	CP023154	1064793	1065618	transcript	0	-	.	.	.	.	.	.
CP023154	1068936	1069086	116	0	+	CP023154	1068229	1069099	mRNA	0	+	.	.	.	.	.	.
CP023154	1071324	1071474	117	0	-	CP023154	1071328	1074283	mRNA	0	-	.	.	.	.	.	.
CP023154	1071324	1071474	117	0	-	CP023154	1071285	1071329	3UTR	0	-	.	.	.	.	.	.
CP023154	1071324	1071474	117	0	-	CP023154	1071285	1075214	transcript	0	-	.	.	.	.	.	.
CP023154	1089397	1089674	118	0	+	CP023154	1089278	1090445	mRNA	0	+	.	.	.	.	.	.
CP023154	1094536	1094686	119	0	+	CP023154	1093990	1095172	mRNA	0	+	.	.	.	.	.	.
CP023154	1102523	1102673	120	0	-	CP023154	1102489	1102759	mRNA	0	-	.	.	.	.	.	.
CP023154	1102523	1102673	120	0	-	CP023154	1102517	1102574	transcript	0	-	.	.	.	.	.	.
CP023154	1108971	1109122	121	0	-	CP023154	1108820	1109275	transcript	0	-	.	.	.	.	.	.
CP023154	1108971	1109122	121	0	-	CP023154	1108820	1109044	3UTR	0	-	.	.	.	.	.	.
CP023154	1108971	1109122	121	0	-	CP023154	1109043	1109247	mRNA	0	-	.	.	.	.	.	.
CP023154	1121833	1122012	122	0	-	CP023154	1121890	1122370	mRNA	0	-	CP023154	1121499	1121883	mRNA	0	+
CP023154	1121833	1122012	122	0	-	CP023154	1121841	1121891	3UTR	0	-	.	.	.	.	.	.
CP023154	1121833	1122012	122	0	-	CP023154	1121841	1122382	transcript	0	-	.	.	.	.	.	.
CP023154	1123100	1123261	123	0	+	CP023154	1123024	1124104	mRNA	0	+	.	.	.	.	.	.
CP023154	1123100	1123261	123	0	+	CP023154	1123198	1124054	transcript	0	+	.	.	.	.	.	.
CP023154	1138948	1139099	124	0	-	CP023154	1138993	1139491	mRNA	0	-	.	.	.	.	.	.
CP023154	1138948	1139099	124	0	-	CP023154	1138842	1138994	3UTR	0	-	.	.	.	.	.	.
CP023154	1138948	1139099	124	0	-	CP023154	1138842	1139521	transcript	0	-	.	.	.	.	.	.
CP023154	1139749	1139900	125	0	+	.	.	.	.	.	.	CP023154	1139829	1140084	mRNA	0	-
CP023154	1143572	1143804	126	0	+	CP023154	1143302	1143674	mRNA	0	+	.	.	.	.	.	.
CP023154	1156612	1156765	127	0	+	CP023154	1154716	1156615	mRNA	0	+	CP023154	1156611	1157070	mRNA	0	-
CP023154	1157503	1157683	128	0	+	CP023154	1157141	1158425	mRNA	0	+	CP023154	1157507	1157536	transcript	0	-
CP023154	1157503	1157683	128	0	+	CP023154	1157254	1158302	transcript	0	+	.	.	.	.	.	.
CP023154	1161081	1161231	129	0	-	CP023154	1161037	1161325	mRNA	0	-	.	.	.	.	.	.
CP023154	1161081	1161231	129	0	-	CP023154	1161075	1161208	transcript	0	-	.	.	.	.	.	.
CP023154	1170349	1170610	130	0	-	CP023154	1170574	1171744	mRNA	0	-	CP023154	1169592	1170582	mRNA	0	+
CP023154	1170349	1170610	130	0	-	CP023154	1170492	1170571	transcript	0	-	.	.	.	.	.	.
CP023154	1178743	1178903	131	0	-	.	.	.	.	.	.	CP023154	1178630	1180004	mRNA	0	+
CP023154	1178743	1178903	131	0	-	CP023154	1178831	1178905	transcript	0	-	.	.	.	.	.	.
CP023154	1179804	1179968	132	0	+	CP023154	1178630	1180004	mRNA	0	+	.	.	.	.	.	.
CP023154	1185885	1186079	133	0	+	CP023154	1185065	1186082	mRNA	0	+	CP023154	1186078	1186978	mRNA	0	-
CP023154	1185885	1186079	133	0	+	CP023154	1185761	1186082	transcript	0	+	CP023154	1186020	1186978	transcript	0	-
CP023154	1190650	1190802	134	0	+	CP023154	1190372	1190681	mRNA	0	+	CP023154	1190677	1190959	mRNA	0	-
CP023154	1206632	1206783	135	0	-	CP023154	1206723	1207131	mRNA	0	-	CP023154	1205909	1206734	mRNA	0	+
CP023154	1206632	1206783	135	0	-	CP023154	1206658	1206724	3UTR	0	-	.	.	.	.	.	.
CP023154	1206632	1206783	135	0	-	CP023154	1206658	1207138	transcript	0	-	CP023154	1205479	1206704	transcript	0	+
CP023154	1222662	1222812	136	0	+	CP023154	1222253	1222811	mRNA	0	+	.	.	.	.	.	.
CP023154	1229344	1229497	137	0	+	CP023154	1229310	1230399	mRNA	0	+	.	.	.	.	.	.
CP023154	1230216	1230366	138	0	-	.	.	.	.	.	.	CP023154	1229310	1230399	mRNA	0	+
CP023154	1242540	1242691	139	0	-	CP023154	1242544	1243216	mRNA	0	-	.	.	.	.	.	.
CP023154	1242540	1242691	139	0	-	CP023154	1242536	1242545	3UTR	0	-	.	.	.	.	.	.
CP023154	1242540	1242691	139	0	-	CP023154	1242536	1243900	transcript	0	-	.	.	.	.	.	.
CP023154	1243920	1244070	140	0	-	CP023154	1243933	1244864	transcript	0	-	.	.	.	.	.	.
CP023154	1243920	1244070	140	0	-	CP023154	1243974	1245171	mRNA	0	-	.	.	.	.	.	.
CP023154	1245743	1245894	141	0	-	CP023154	1245829	1246876	mRNA	0	-	CP023154	1245295	1245838	mRNA	0	+
CP023154	1245743	1245894	141	0	-	CP023154	1245797	1245830	3UTR	0	-	.	.	.	.	.	.
CP023154	1245743	1245894	141	0	-	CP023154	1245797	1246887	transcript	0	-	.	.	.	.	.	.
CP023154	1255218	1255368	142	0	+	CP023154	1255138	1256395	mRNA	0	+	.	.	.	.	.	.
CP023154	1256260	1256410	143	0	+	CP023154	1255138	1256395	mRNA	0	+	.	.	.	.	.	.
CP023154	1289823	1289975	144	0	-	.	.	.	.	.	.	CP023154	1289639	1291538	mRNA	0	+
CP023154	1289823	1289975	144	0	-	CP023154	1289901	1289957	transcript	0	-	CP023154	1289881	1291529	transcript	0	+
CP023154	1291421	1291571	145	0	-	CP023154	1291520	1292441	mRNA	0	-	CP023154	1289639	1291538	mRNA	0	+
CP023154	1291421	1291571	145	0	-	CP023154	1291471	1291521	3UTR	0	-	.	.	.	.	.	.
CP023154	1291421	1291571	145	0	-	CP023154	1291471	1292988	transcript	0	-	CP023154	1289881	1291529	transcript	0	+
CP023154	1304968	1305121	146	0	-	.	.	.	.	.	.	CP023154	1303746	1305084	mRNA	0	+
CP023154	1308046	1308196	147	0	+	CP023154	1306035	1308153	mRNA	0	+	.	.	.	.	.	.
CP023154	1308046	1308196	147	0	+	CP023154	1308152	1308174	3UTR	0	+	.	.	.	.	.	.
CP023154	1308046	1308196	147	0	+	CP023154	1306013	1308174	transcript	0	+	.	.	.	.	.	.
CP023154	1317976	1318128	148	0	-	CP023154	1318011	1319428	transcript	0	-	.	.	.	.	.	.
CP023154	1317976	1318128	148	0	-	CP023154	1318011	1318053	3UTR	0	-	.	.	.	.	.	.
CP023154	1317976	1318128	148	0	-	CP023154	1318052	1319417	mRNA	0	-	.	.	.	.	.	.
CP023154	1333808	1333958	149	0	+	.	.	.	.	.	.	CP023154	1333718	1334345	mRNA	0	-
CP023154	1333808	1333958	149	0	+	.	.	.	.	.	.	CP023154	1333722	1334192	transcript	0	-
CP023154	1350152	1350302	150	0	-	CP023154	1349009	1350743	mRNA	0	-	.	.	.	.	.	.
CP023154	1350152	1350302	150	0	-	CP023154	1349509	1350743	transcript	0	-	.	.	.	.	.	.
CP023154	1354268	1354419	151	0	+	CP023154	1352459	1354346	mRNA	0	+	.	.	.	.	.	.
CP023154	1369010	1369160	152	0	+	CP023154	1368728	1369160	mRNA	0	+	.	.	.	.	.	.
CP023154	1369010	1369160	152	0	+	CP023154	1368718	1369101	transcript	0	+	CP023154	1369103	1369134	transcript	0	-
CP023154	1375369	1375519	153	0	-	CP023154	1375483	1375888	mRNA	0	-	CP023154	1375283	1375487	mRNA	0	+
CP023154	1375369	1375519	153	0	-	CP023154	1375413	1375484	3UTR	0	-	.	.	.	.	.	.
CP023154	1375369	1375519	153	0	-	CP023154	1375413	1375898	transcript	0	-	CP023154	1375386	1375517	transcript	0	+
CP023154	1381923	1382073	154	0	+	CP023154	1381558	1382032	transcript	0	+	.	.	.	.	.	.
CP023154	1381923	1382073	154	0	+	CP023154	1381549	1382002	mRNA	0	+	.	.	.	.	.	.
CP023154	1387568	1387718	155	0	-	.	.	.	.	.	.	CP023154	1384729	1387672	mRNA	0	+
CP023154	1402963	1403113	156	0	-	CP023154	1401541	1403107	mRNA	0	-	.	.	.	.	.	.
CP023154	1402963	1403113	156	0	-	CP023154	1402915	1403107	transcript	0	-	.	.	.	.	.	.
CP023154	1408602	1408752	157	0	-	CP023154	1408638	1409232	mRNA	0	-	.	.	.	.	.	.
CP023154	1408602	1408752	157	0	-	CP023154	1408625	1409170	transcript	0	-	.	.	.	.	.	.
CP023154	1452132	1452285	158	0	+	CP023154	1451703	1452204	mRNA	0	+	.	.	.	.	.	.
CP023154	1456283	1456433	159	0	-	CP023154	1455995	1457243	mRNA	0	-	.	.	.	.	.	.
CP023154	1456283	1456433	159	0	-	CP023154	1456099	1458158	transcript	0	-	.	.	.	.	.	.
CP023154	1498102	1498382	160	0	-	CP023154	1498266	1498743	mRNA	0	-	CP023154	1497497	1498283	mRNA	0	+
CP023154	1498102	1498382	160	0	-	CP023154	1498163	1498267	3UTR	0	-	.	.	.	.	.	.
CP023154	1498102	1498382	160	0	-	CP023154	1498163	1498769	transcript	0	-	.	.	.	.	.	.
CP023154	1499054	1499204	161	0	-	.	.	.	.	.	.	CP023154	1498882	1499410	mRNA	0	+
CP023154	1499054	1499204	161	0	-	CP023154	1499171	1499221	transcript	0	-	.	.	.	.	.	.
CP023154	1508113	1508264	162	0	+	CP023154	1507053	1508148	mRNA	0	+	CP023154	1508079	1508637	mRNA	0	-
CP023154	1514477	1514627	163	0	-	CP023154	1514539	1515148	mRNA	0	-	.	.	.	.	.	.
CP023154	1514477	1514627	163	0	-	CP023154	1514105	1516385	transcript	0	-	.	.	.	.	.	.
CP023154	1522368	1522538	164	0	+	CP023154	1522103	1523849	mRNA	0	+	.	.	.	.	.	.
CP023154	1526464	1526623	165	0	-	.	.	.	.	.	.	CP023154	1526336	1527218	mRNA	0	+
CP023154	1538243	1538393	166	0	+	.	.	.	.	.	.	CP023154	1536524	1538489	mRNA	0	-
CP023154	1545648	1545798	167	0	+	CP023154	1545188	1546331	mRNA	0	+	.	.	.	.	.	.
CP023154	1545648	1545798	167	0	+	CP023154	1544106	1545955	transcript	0	+	.	.	.	.	.	.
CP023154	1547052	1547226	168	0	+	CP023154	1547015	1547183	mRNA	0	+	.	.	.	.	.	.
CP023154	1547052	1547226	168	0	+	CP023154	1547001	1550636	transcript	0	+	CP023154	1547095	1547171	transcript	0	-
CP023154	1554750	1554902	169	0	-	.	.	.	.	.	.	CP023154	1554672	1555680	mRNA	0	+
CP023154	1560390	1560540	170	0	-	.	.	.	.	.	.	CP023154	1559224	1560730	mRNA	0	+
CP023154	1578144	1578294	171	0	-	CP023154	1578211	1578235	transcript	0	-	CP023154	1575118	1578289	mRNA	0	+
CP023154	1578144	1578294	171	0	-	CP023154	1578277	1579063	mRNA	0	-	CP023154	1575332	1578342	transcript	0	+
CP023154	1578224	1578411	172	0	+	CP023154	1575118	1578289	mRNA	0	+	CP023154	1578277	1579063	mRNA	0	-
CP023154	1578224	1578411	172	0	+	CP023154	1575332	1578342	transcript	0	+	CP023154	1578326	1579078	transcript	0	-
CP023154	1584519	1584671	173	0	+	CP023154	1584461	1584665	mRNA	0	+	.	.	.	.	.	.
CP023154	1584519	1584671	173	0	+	CP023154	1584664	1584695	3UTR	0	+	.	.	.	.	.	.
CP023154	1584519	1584671	173	0	+	CP023154	1584434	1584695	transcript	0	+	.	.	.	.	.	.
CP023154	1591466	1591617	174	0	-	CP023154	1591493	1591571	ncRNA	0	-	CP023154	1591087	1591720	mRNA	0	+
CP023154	1591466	1591617	174	0	-	CP023154	1591493	1591571	transcript	0	-	CP023154	1591080	1591575	transcript	0	+
CP023154	1600715	1600995	175	0	+	CP023154	1600176	1600887	mRNA	0	+	CP023154	1600876	1601836	mRNA	0	-
CP023154	1616576	1616835	176	0	+	CP023154	1615715	1616756	mRNA	0	+	CP023154	1616771	1617227	mRNA	0	-
CP023154	1616576	1616835	176	0	+	CP023154	1616755	1616779	3UTR	0	+	.	.	.	.	.	.
CP023154	1616576	1616835	176	0	+	CP023154	1615692	1616779	transcript	0	+	.	.	.	.	.	.
CP023154	1618488	1618638	177	0	-	CP023154	1618541	1619825	mRNA	0	-	.	.	.	.	.	.
CP023154	1618488	1618638	177	0	-	CP023154	1617776	1618499	mRNA	0	-	.	.	.	.	.	.
CP023154	1618488	1618638	177	0	-	CP023154	1616904	1619839	transcript	0	-	.	.	.	.	.	.
CP023154	1636591	1636788	178	0	-	CP023154	1636737	1637265	mRNA	0	-	CP023154	1635604	1636741	mRNA	0	+
CP023154	1636591	1636788	178	0	-	CP023154	1636634	1636738	3UTR	0	-	.	.	.	.	.	.
CP023154	1636591	1636788	178	0	-	CP023154	1636634	1637858	transcript	0	-	.	.	.	.	.	.
CP023154	1637112	1637269	179	0	-	CP023154	1636737	1637265	mRNA	0	-	.	.	.	.	.	.
CP023154	1637112	1637269	179	0	-	CP023154	1637257	1637848	mRNA	0	-	.	.	.	.	.	.
CP023154	1637112	1637269	179	0	-	CP023154	1636634	1637858	transcript	0	-	.	.	.	.	.	.
CP023154	1653214	1653389	180	0	-	CP023154	1653176	1653572	mRNA	0	-	.	.	.	.	.	.
CP023154	1653214	1653389	180	0	-	CP023154	1653217	1653604	transcript	0	-	.	.	.	.	.	.
CP023154	1662526	1662678	181	0	+	CP023154	1661040	1662654	mRNA	0	+	.	.	.	.	.	.
CP023154	1662526	1662678	181	0	+	CP023154	1662640	1663075	mRNA	0	+	.	.	.	.	.	.
CP023154	1662948	1663128	182	0	-	CP023154	1663057	1663429	mRNA	0	-	CP023154	1662640	1663075	mRNA	0	+
CP023154	1662948	1663128	182	0	-	CP023154	1663009	1663058	3UTR	0	-	.	.	.	.	.	.
CP023154	1662948	1663128	182	0	-	CP023154	1663009	1663758	transcript	0	-	.	.	.	.	.	.
CP023154	1674042	1674196	183	0	-	.	.	.	.	.	.	CP023154	1673186	1674554	mRNA	0	+
CP023154	1674042	1674196	183	0	-	CP023154	1674157	1674208	transcript	0	-	.	.	.	.	.	.
CP023154	1682539	1682689	184	0	-	CP023154	1682637	1683189	mRNA	0	-	CP023154	1681868	1682723	mRNA	0	+
CP023154	1682539	1682689	184	0	-	CP023154	1682574	1682638	3UTR	0	-	.	.	.	.	.	.
CP023154	1682539	1682689	184	0	-	CP023154	1682574	1683711	transcript	0	-	CP023154	1681895	1682667	transcript	0	+
CP023154	1699778	1699928	185	0	-	CP023154	1699825	1700107	mRNA	0	-	CP023154	1699223	1699823	mRNA	0	+
CP023154	1699778	1699928	185	0	-	CP023154	1699778	1699826	3UTR	0	-	.	.	.	.	.	.
CP023154	1699778	1699928	185	0	-	CP023154	1699778	1700142	transcript	0	-	.	.	.	.	.	.
CP023154	1716610	1716763	186	0	-	.	.	.	.	.	.	CP023154	1716328	1718251	mRNA	0	+
CP023154	1755968	1756255	187	0	-	CP023154	1755986	1757291	mRNA	0	-	.	.	.	.	.	.
CP023154	1755968	1756255	187	0	-	CP023154	1749707	1757321	transcript	0	-	.	.	.	.	.	.
CP023154	1769917	1770067	188	0	-	CP023154	1769992	1771894	mRNA	0	-	.	.	.	.	.	.
CP023154	1769917	1770067	188	0	-	CP023154	1769990	1771760	transcript	0	-	.	.	.	.	.	.
CP023154	1789346	1789496	189	0	+	CP023154	1789047	1789764	mRNA	0	+	.	.	.	.	.	.
CP023154	1789346	1789496	189	0	+	CP023154	1787225	1789796	transcript	0	+	.	.	.	.	.	.
CP023154	1792254	1792405	190	0	+	CP023154	1790623	1792273	mRNA	0	+	.	.	.	.	.	.
CP023154	1792254	1792405	190	0	+	CP023154	1792272	1792310	3UTR	0	+	.	.	.	.	.	.
CP023154	1792254	1792405	190	0	+	CP023154	1790596	1792310	transcript	0	+	.	.	.	.	.	.
CP023154	1851171	1851323	191	0	-	CP023154	1850865	1851741	mRNA	0	-	.	.	.	.	.	.
CP023154	1851171	1851323	191	0	-	CP023154	1850989	1851699	transcript	0	-	.	.	.	.	.	.
CP023154	1854302	1854455	192	0	+	CP023154	1853690	1854380	mRNA	0	+	.	.	.	.	.	.
CP023154	1860043	1860193	193	0	-	CP023154	1860190	1860787	mRNA	0	-	CP023154	1859747	1860194	mRNA	0	+
CP023154	1860043	1860193	193	0	-	CP023154	1860046	1860191	3UTR	0	-	.	.	.	.	.	.
CP023154	1860043	1860193	193	0	-	CP023154	1860046	1860953	transcript	0	-	.	.	.	.	.	.
CP023154	1867440	1867594	194	0	-	.	.	.	.	.	.	.	.	.	.	.	.
CP023154	1867440	1867594	194	0	-	CP023154	1867435	1867643	5UTR	0	-	.	.	.	.	.	.
CP023154	1867440	1867594	194	0	-	CP023154	1866818	1867686	transcript	0	-	.	.	.	.	.	.
CP023154	1879369	1879519	195	0	-	CP023154	1879410	1879599	sORF	0	-	.	.	.	.	.	.
CP023154	1879369	1879519	195	0	-	CP023154	1879405	1879626	ncRNA	0	-	.	.	.	.	.	.
CP023154	1879369	1879519	195	0	-	CP023154	1879412	1879626	transcript	0	-	.	.	.	.	.	.
CP023154	1880567	1880757	196	0	+	CP023154	1879775	1880768	mRNA	0	+	.	.	.	.	.	.
CP023154	1886022	1886172	197	0	+	.	.	.	.	.	.	CP023154	1885423	1886218	mRNA	0	-
CP023154	1886022	1886172	197	0	+	.	.	.	.	.	.	CP023154	1885360	1886228	transcript	0	-
CP023154	1888957	1889129	198	0	+	CP023154	1888259	1889033	mRNA	0	+	.	.	.	.	.	.
CP023154	1888957	1889129	198	0	+	CP023154	1888657	1889058	transcript	0	+	.	.	.	.	.	.
CP023154	1889259	1889411	199	0	-	.	.	.	.	.	.	CP023154	1889369	1889475	ncRNA	0	+
CP023154	1889259	1889411	199	0	-	.	.	.	.	.	.	CP023154	1889369	1889475	transcript	0	+
Grünberger, Felix; Reichelt, Robert; Bunk, Boyke; Spröer, Cathrin; Overmann, Jörg; Rachel, Reinhard et al. (2019): Next Generation DNA-Seq and Differential RNA-Seq Allow Re-annotation of the Pyrococcus furiosus DSM 3638 Genome and Provide Insights Into Archaeal Antisense Transcription. In: Frontiers in microbiology 10, S. 1603. DOI: 10.3389/fmicb.2019.01603

## Sheet: RNAtype
Table S1. Final assignment of SmAP1 binding sites to a specific feature region in the P. furiosus genome.
Chrom	Start	End	Name	Score	Strand	Type	Target
CP023154	517	670	1	0	-	asRNA	PFDSM3638_00005
CP023154	1324	1479	2	0	-	asRNA	PFDSM3638_00010
CP023154	11421	11706	3	0	+	crRNA	.
CP023154	14503	14653	4	0	-	ncRNA	.
CP023154	25636	25794	5	0	-	asRNA	PFDSM3638_00100
CP023154	36094	36244	6	0	-	mRNA	PFDSM3638_00145
CP023154	41102	41252	7	0	-	mRNA	PFDSM3638_00170
CP023154	48273	48424	8	0	+	asRNA	PFDSM3638_00215
CP023154	61597	61747	9	0	+	ncRNA	.
CP023154	79862	80032	10	0	-	asRNA	PFDSM3638_00370
CP023154	89135	89285	11	0	+	mRNA	PFDSM3638_00415
CP023154	102997	103151	12	0	-	mRNA	PFDSM3638_00500
CP023154	107237	107387	13	0	-	mRNA	PFDSM3638_00520
CP023154	118288	118472	14	0	-	asRNA	PFDSM3638_00570
CP023154	138919	139099	15	0	-	mRNA	PFDSM3638_00670
CP023154	171668	171851	16	0	+	mRNA	PFDSM3638_00830
CP023154	172186	172361	17	0	+	mRNA	PFDSM3638_00835
CP023154	193801	193954	18	0	-	asRNA	PFDSM3638_00935
CP023154	196200	196378	19	0	-	asRNA	PFDSM3638_00940
CP023154	203813	203964	20	0	-	asRNA	PFDSM3638_00965
CP023154	204247	204413	21	0	-	asRNA	PFDSM3638_00970
CP023154	204859	205010	22	0	-	asRNA	PFDSM3638_00970
CP023154	222408	222561	23	0	-	asRNA	PFDSM3638_01065
CP023154	229231	229385	24	0	+	mRNA	PFDSM3638_01105
CP023154	230216	230366	25	0	-	mRNA	PFDSM3638_01110
CP023154	231624	231774	26	0	-	mRNA	PFDSM3638_01120
CP023154	239687	239881	27	0	+	mRNA	PFDSM3638_01165
CP023154	259060	259210	28	0	+	mRNA	PFDSM3638_01260
CP023154	259546	259696	29	0	-	ncRNA	.
CP023154	265250	265405	30	0	+	asRNA	PFDSM3638_01290
CP023154	295791	295945	31	0	+	crRNA	.
CP023154	304306	304473	32	0	-	mRNA	PFDSM3638_01465
CP023154	325111	325261	33	0	-	asRNA	PFDSM3638_01595
CP023154	328320	328612	34	0	+	asRNA	PFDSM3638_01605
CP023154	335501	335651	35	0	-	mRNA	PFDSM3638_01650
CP023154	346413	346563	36	0	+	mRNA	PFDSM3638_01715
CP023154	347138	347290	37	0	+	mRNA	PFDSM3638_01715
CP023154	351151	351301	38	0	-	mRNA	PFDSM3638_01755
CP023154	358171	358324	39	0	-	sORF	.
CP023154	379601	379760	40	0	-	ncRNA	.
CP023154	384337	384487	41	0	+	mRNA	PFDSM3638_01930
CP023154	385327	385477	42	0	+	asRNA	PFDSM3638_01940
CP023154	391999	392149	43	0	-	mRNA	PFDSM3638_01980
CP023154	393184	393335	44	0	+	asRNA	PFDSM3638_01985
CP023154	399342	399492	45	0	+	mRNA	PFDSM3638_02015
CP023154	403842	403992	46	0	-	mRNA	PFDSM3638_02040
CP023154	406959	407110	47	0	-	mRNA	PFDSM3638_02050
CP023154	423838	424124	48	0	+	mRNA	PFDSM3638_02125
CP023154	424667	424828	49	0	+	mRNA	PFDSM3638_02135
CP023154	429194	429349	50	0	+	asRNA	PFDSM3638_02160
CP023154	441725	441887	51	0	+	mRNA	PFDSM3638_02195
CP023154	441910	442060	52	0	-	mRNA	PFDSM3638_02200
CP023154	447911	448062	53	0	-	mRNA	PFDSM3638_02235
CP023154	448900	449053	54	0	-	mRNA	PFDSM3638_02235
CP023154	450816	450973	55	0	+	asRNA	PFDSM3638_02250
CP023154	455359	455510	56	0	-	ncRNA	.
CP023154	510559	510709	57	0	-	ncRNA	.
CP023154	512327	512490	58	0	-	mRNA	PFDSM3638_02540
CP023154	516120	516320	59	0	-	mRNA	PFDSM3638_02565
CP023154	519154	519306	60	0	+	mRNA	PFDSM3638_02580
CP023154	522429	522586	61	0	-	mRNA	PFDSM3638_02595
CP023154	526537	526687	62	0	-	asRNA	PFDSM3638_02625
CP023154	533922	534073	63	0	+	mRNA	PFDSM3638_02665
CP023154	538318	538472	64	0	-	tRNA	.
CP023154	545678	545828	65	0	+	asRNA	PFDSM3638_02735
CP023154	555922	556083	66	0	-	mRNA	PFDSM3638_02795
CP023154	561487	561640	67	0	+	mRNA	PFDSM3638_02815
CP023154	577540	577695	68	0	+	asRNA	PFDSM3638_02880
CP023154	617375	617535	69	0	+	mRNA	PFDSM3638_03075
CP023154	621725	621901	70	0	-	mRNA	PFDSM3638_03120
CP023154	625551	625701	71	0	-	mRNA	PFDSM3638_03145
CP023154	640944	641097	72	0	+	asRNA	PFDSM3638_03225
CP023154	644565	644715	73	0	+	mRNA	PFDSM3638_03240
CP023154	661279	661461	74	0	+	mRNA	PFDSM3638_03345
CP023154	678304	678457	75	0	+	crRNA	.
CP023154	703171	703321	76	0	+	mRNA	PFDSM3638_03585
CP023154	711933	712086	77	0	+	asRNA	PFDSM3638_03650
CP023154	716898	717049	78	0	+	mRNA	PFDSM3638_03685
CP023154	721517	721671	79	0	+	mRNA	PFDSM3638_03705
CP023154	744117	744268	80	0	+	asRNA	PFDSM3638_03820
CP023154	758485	758637	81	0	-	mRNA	PFDSM3638_03935
CP023154	765966	766122	82	0	+	asRNA	PFDSM3638_03970
CP023154	795085	795235	83	0	+	ncRNA	.
CP023154	799522	799672	84	0	-	mRNA	PFDSM3638_04210
CP023154	811034	811343	85	0	-	mRNA	PFDSM3638_04265
CP023154	816212	816362	86	0	-	mRNA	PFDSM3638_04295
CP023154	819045	819195	87	0	+	mRNA	PFDSM3638_04305
CP023154	837296	837456	88	0	-	mRNA	PFDSM3638_04415
CP023154	840587	840741	89	0	+	mRNA	PFDSM3638_04435
CP023154	843855	844005	90	0	-	asRNA	PFDSM3638_04450
CP023154	849959	850175	91	0	+	mRNA	PFDSM3638_04470
CP023154	872336	872489	92	0	-	ncRNA	.
CP023154	876865	877015	93	0	-	mRNA	PFDSM3638_04665
CP023154	890727	890880	94	0	-	asRNA	PFDSM3638_04720
CP023154	894362	894512	95	0	+	mRNA	PFDSM3638_04750
CP023154	903676	903826	96	0	+	asRNA	PFDSM3638_04835
CP023154	907612	907762	97	0	-	mRNA	PFDSM3638_04850
CP023154	923173	923323	98	0	-	asRNA	PFDSM3638_04960
CP023154	940237	940393	99	0	+	asRNA	PFDSM3638_05030
CP023154	942303	942454	100	0	+	mRNA	PFDSM3638_05035
CP023154	948758	948916	101	0	+	mRNA	PFDSM3638_05070
CP023154	952664	952815	102	0	+	asRNA	PFDSM3638_05095
CP023154	956945	957147	103	0	+	ncRNA	.
CP023154	957500	957651	104	0	-	asRNA	PFDSM3638_05120
CP023154	959542	959693	105	0	-	mRNA	PFDSM3638_05135
CP023154	961982	962134	106	0	+	mRNA	PFDSM3638_05145
CP023154	962899	963051	107	0	-	mRNA	PFDSM3638_05150
CP023154	969200	969356	108	0	-	asRNA	PFDSM3638_05175
CP023154	973709	973859	109	0	+	mRNA	PFDSM3638_05205
CP023154	974005	974160	110	0	-	mRNA	PFDSM3638_05215
CP023154	974010	974176	111	0	+	mRNA	PFDSM3638_05210
CP023154	979586	979736	112	0	-	mRNA	PFDSM3638_05245
CP023154	1007418	1007577	113	0	+	mRNA	PFDSM3638_05385
CP023154	1048248	1048400	114	0	-	crRNA	.
CP023154	1064691	1064935	115	0	-	mRNA	PFDSM3638_05670
CP023154	1068936	1069086	116	0	+	mRNA	PFDSM3638_05690
CP023154	1071324	1071474	117	0	-	mRNA	PFDSM3638_05700
CP023154	1089397	1089674	118	0	+	mRNA	PFDSM3638_05800
CP023154	1094536	1094686	119	0	+	mRNA	PFDSM3638_05830
CP023154	1102523	1102673	120	0	-	mRNA	PFDSM3638_05860
CP023154	1108971	1109122	121	0	-	mRNA	PFDSM3638_05910
CP023154	1121833	1122012	122	0	-	mRNA	PFDSM3638_05985
CP023154	1123100	1123261	123	0	+	mRNA	PFDSM3638_05995
CP023154	1138948	1139099	124	0	-	mRNA	PFDSM3638_06075
CP023154	1139749	1139900	125	0	+	asRNA	PFDSM3638_06080
CP023154	1143572	1143804	126	0	+	mRNA	PFDSM3638_06115
CP023154	1156612	1156765	127	0	+	mRNA	PFDSM3638_06180
CP023154	1157503	1157683	128	0	+	mRNA	PFDSM3638_06190
CP023154	1161081	1161231	129	0	-	mRNA	PFDSM3638_06205
CP023154	1170349	1170610	130	0	-	mRNA	PFDSM3638_06250
CP023154	1178743	1178903	131	0	-	asRNA	PFDSM3638_06295
CP023154	1179804	1179968	132	0	+	mRNA	PFDSM3638_06295
CP023154	1185885	1186079	133	0	+	mRNA	PFDSM3638_06325
CP023154	1190650	1190802	134	0	+	mRNA	PFDSM3638_06360
CP023154	1206632	1206783	135	0	-	mRNA	PFDSM3638_06470
CP023154	1222662	1222812	136	0	+	mRNA	PFDSM3638_06555
CP023154	1229344	1229497	137	0	+	mRNA	PFDSM3638_06605
CP023154	1230216	1230366	138	0	-	asRNA	PFDSM3638_06605
CP023154	1242540	1242691	139	0	-	mRNA	PFDSM3638_06675
CP023154	1243920	1244070	140	0	-	mRNA	PFDSM3638_06685
CP023154	1245743	1245894	141	0	-	mRNA	PFDSM3638_06695
CP023154	1255218	1255368	142	0	+	mRNA	PFDSM3638_06750
CP023154	1256260	1256410	143	0	+	mRNA	PFDSM3638_06755
CP023154	1289823	1289975	144	0	-	asRNA	PFDSM3638_06975
CP023154	1291421	1291571	145	0	-	mRNA	PFDSM3638_06980
CP023154	1304968	1305121	146	0	-	asRNA	PFDSM3638_07040
CP023154	1308046	1308196	147	0	+	mRNA	PFDSM3638_07050
CP023154	1317976	1318128	148	0	-	mRNA	PFDSM3638_07110
CP023154	1333808	1333958	149	0	+	asRNA	PFDSM3638_07215
CP023154	1350152	1350302	150	0	-	mRNA	PFDSM3638_07310
CP023154	1354268	1354419	151	0	+	mRNA	PFDSM3638_07325
CP023154	1369010	1369160	152	0	+	mRNA	PFDSM3638_07425
CP023154	1375369	1375519	153	0	-	mRNA	PFDSM3638_07495
CP023154	1381923	1382073	154	0	+	mRNA	PFDSM3638_07545
CP023154	1387568	1387718	155	0	-	asRNA	PFDSM3638_07570
CP023154	1402963	1403113	156	0	-	ncRNA	PFDSM3638_07655
CP023154	1408602	1408752	157	0	-	mRNA	PFDSM3638_07695
CP023154	1452132	1452285	158	0	+	mRNA	PFDSM3638_07935
CP023154	1456283	1456433	159	0	-	mRNA	PFDSM3638_07960
CP023154	1498102	1498382	160	0	-	mRNA	PFDSM3638_08200
CP023154	1499054	1499204	161	0	-	asRNA	PFDSM3638_08205
CP023154	1508113	1508264	162	0	+	mRNA	PFDSM3638_08245
CP023154	1514477	1514627	163	0	-	mRNA	PFDSM3638_08285
CP023154	1522368	1522538	164	0	+	mRNA	PFDSM3638_08370
CP023154	1526464	1526623	165	0	-	asRNA	PFDSM3638_08385
CP023154	1538243	1538393	166	0	+	asRNA	PFDSM3638_08455
CP023154	1545648	1545798	167	0	+	mRNA	PFDSM3638_08510
CP023154	1547052	1547226	168	0	+	mRNA	PFDSM3638_08520
CP023154	1554750	1554902	169	0	-	asRNA	PFDSM3638_08570
CP023154	1560390	1560540	170	0	-	asRNA	PFDSM3638_08595
CP023154	1578144	1578294	171	0	-	mRNA	PFDSM3638_08690
CP023154	1578224	1578411	172	0	+	mRNA	PFDSM3638_08685
CP023154	1584519	1584671	173	0	+	mRNA	PFDSM3638_08725
CP023154	1591466	1591617	174	0	-	asRNA	PFDSM3638_08765
CP023154	1600715	1600995	175	0	+	mRNA	PFDSM3638_08835
CP023154	1616576	1616835	176	0	+	mRNA	PFDSM3638_08920
CP023154	1618488	1618638	177	0	-	mRNA	PFDSM3638_08940
CP023154	1636591	1636788	178	0	-	mRNA	PFDSM3638_09050
CP023154	1637112	1637269	179	0	-	mRNA	PFDSM3638_09050
CP023154	1653214	1653389	180	0	-	mRNA	PFDSM3638_09195
CP023154	1662526	1662678	181	0	+	mRNA	PFDSM3638_09250
CP023154	1662948	1663128	182	0	-	mRNA	PFDSM3638_09260
CP023154	1674042	1674196	183	0	-	asRNA	PFDSM3638_09305
CP023154	1682539	1682689	184	0	-	mRNA	PFDSM3638_09350
CP023154	1699778	1699928	185	0	-	mRNA	PFDSM3638_09460
CP023154	1716610	1716763	186	0	-	asRNA	PFDSM3638_09565
CP023154	1755968	1756255	187	0	-	mRNA	PFDSM3638_09745
CP023154	1769917	1770067	188	0	-	mRNA	PFDSM3638_09830
CP023154	1789346	1789496	189	0	+	mRNA	PFDSM3638_09930
CP023154	1792254	1792405	190	0	+	mRNA	PFDSM3638_09940
CP023154	1851171	1851323	191	0	-	mRNA	PFDSM3638_10300
CP023154	1854302	1854455	192	0	+	mRNA	PFDSM3638_10315
CP023154	1860043	1860193	193	0	-	mRNA	PFDSM3638_10365
CP023154	1867440	1867594	194	0	-	ncRNA	.
CP023154	1879369	1879519	195	0	-	sORF	.
CP023154	1880567	1880757	196	0	+	mRNA	PFDSM3638_10460
CP023154	1886022	1886172	197	0	+	asRNA	PFDSM3638_10495
CP023154	1888957	1889129	198	0	+	mRNA	PFDSM3638_10515
CP023154	1889259	1889411	199	0	-	ncRNA	.

## Sheet: Motif
Table S1. Glam2-derived U-rich gapped motifs found in SmAP1 binding regions. The RNA sequence (5' to 3') and the motif score are shown. Gap regions are represented as dots corresponding to the number of nucleotides.
Name	Motif	Score
1	agcccuuuua.............................aguucaguauuu.auucu	10.6
2	agaauucaccu............................uuuucauaguau.ucucu	11.1
3	ugccgugug..............................uuuuuauaacugcucuaa	8.77
4	agaucuuuaga............................auuuuucuaauu.ucuag	16.4
5	aauuuuuuguua...........................uugcccgaacau.uuucu	9.45
6	ucgacuuuugaa...........................uucuuugaacuacuugua	8.77
7	aggcuuuu...............................cucuuggauuua.aacuu	12.6
8	aauagucuugagaauaugcuu..................ccucuccuuaua.ucuuu	7.42
9	ugguuucucuuguuaagc.....................uuuuaugaucuu.auuuu	15.4
10	uguuaucucaac...........................auuucugaacuu.ugcaa	10.3
11	uaauuuuucaacg..........................uguucuacuauu.ucuuc	12.6
12	agucauuuacggcugau......................uuucuuaauuuu.uauuu	16.5
15	uaucuuuuaucucaacaggaagcu...............cuucaagaauuu.uauuu	12.8
16	ugcacuauguugagu........................uuuuuggaacau.uuuac	8.8
17	gagccucug..............................aucucucuauuu.auuua	8.59
18	aauacuuccc.............................uucucaucacug.uacug	7.6
19	uacauuguaau............................auucuucauuuu.ucugu	13.6
20	ugccuuguaga............................auuuuuucucuu.ucucu	14
21	uguaauaucac............................uuuuaucagcau.uccau	8.13
22	agcuauuc...............................cuucuguaacuu.uuucc	8.51
23	aggucuuuaggaa..........................auucuguuauua.uauuu	14.3
24	uaauuucuugaauu.........................cuuuuucuauua.ucuug	16
25	uaaauuuug..............................uuucacgauuga.uauug	10.9
26	aaacuuauuucu...........................aucuuuuauuua.aauau	12
27	ugaucuauacc............................cuuuuccaucuu.uucuu	17
28	ugacuuauuuccc..........................cuucuuuuuuug.uuuua	15.4
29	uggcuuuu...............................uuucuuuagauucucuag	14.6
30	ucaucuuua..............................uuuuuauauaau.acucg	12.1
31	uauccuuucguu...........................ugucuuccacac.uuuca	8.8
32	agucuuuuuccga..........................auuuuugaacag.uuuua	17.2
33	agaccuucuuaag..........................acuuuugauauc.uuuua	14.4
34	acucauaua..............................ucucuuuaaaua.uguca	5.44
35	uauuuuuuc..............................uuucuuucucag.uccua	14.7
36	agcauuguccauuacuagc....................uuuucaaaacuu.aucuu	8.7
37	uguccucu...............................ccucuaaaguuc.aacuu	9.64
38	uaacuucc...............................uuuuuccauauu.uucuu	15.5
39	agucuuau...............................ucuccugauuug.ucuaa	12.9
40	uauccuuugauugcuc.......................uauuuuguacuucucuuc	13.2
41	aaaucuuu...............................uaucuuuauuua.ucugg	14.7
42	agacuuuug..............................uuuuuccaaugg.acuuu	15.7
43	ugauuuuuac.............................uauuuuuaguug.uauuu	18.5
44	agaucugu...............................cuuuuguaacuu.uuuuc	15
45	aguacuuucggcaguaaugaguaaaagcaucgaug....uauucuuaacuc.ucuca	8.36
46	ucuacucu...............................ucuucuuauuuc.ucccu	12.8
47	ugguguuua..............................uuuuacucucuc.uguua	9.99
48	uguccuucaauaaaucau.....................uuuucugaauuu.ucuuu	18.4
49	uagccuuu...............................aucuuugcuagu.aucuu	10.4
50	agacuugu...............................uuucguaaacuu.uauuu	11.5
51	aaauuucuucugcucuc......................uucuuuaauauu.ucuuu	17.3
52	aguuuucgg..............................acucuuuaacau.acuug	8.82
53	agguauuuc..............................uuccucuaacuc.aacau	6.72
54	ugaauucuauuu...........................auucaagaaaaa.uggua	4.89
55	agcauuucca.............................ucuucugaaugu.acuug	10
56	aguucucuuac............................uccuuuuuucgg.acuuu	10.6
57	uauuuuuuggag...........................cucucucaguug.uucua	13.4
58	aacacucuaaga...........................auuuuugaaauucuauau	13.5
59	agacuuuu...............................aguuuuucucuu.uguua	16.5
60	ugcaguuu...............................acuccagaucuucuucca	8.93
61	agucgucu...............................uuuuaagauuua.uccaa	11.2
62	agaacuuu...............................cuuucccauuuu.agaga	7.88
63	ugcucuuu...............................aacuuuccuuuu.uauuu	15.8
64	aguucuuuuuagacu........................uuuuuugagauu.auuuu	18.9
65	uguugucu...............................cuuuuagaauuc.uuuuu	17.9
66	uaaauuau...............................ucuuuuuuucca.uauuc	8.4
67	agaacuau...............................accuuugcacuu.uuauc	8.79
68	uguauucu...............................ucuuuccaguuc.uucuc	12.9
69	ugaucucu...............................uuucuccuauau.uuuua	16
70	ucuucuuuu..............................auuuuauaauuu.agcuu	15.1
71	aagcuuuc...............................ucuuaaucucau.uuuuu	9.48
72	uaaauuguuaagggc........................uuucaacaucuu.uccaa	8.31
73	aauacuuucgg............................aucucuuaacuu.uagag	9.07
74	acuacuucg..............................uuuccuaauaau.uauga	6.02
75	agcaguuc...............................uacuuugauaag.acugu	4.15
76	ugauuuuc...............................uuuucuuauuuc.ucuuu	20.5
77	aaucuuuuccguagua.......................cuuuuugaauuu.ccuca	11.3
78	ggcccucu...............................auuuuucugaug.auugu	5.38
79	uaaaguuugcuaaggac......................aguccucaaaua.uuguu	6.87
80	agcacucucuucuaauaagaaccguuggacu........uccuaugaaauu.uucuu	6.95
81	uggcauuucuc............................aucuuuuaucuc.auuua	13.4
82	aauucuuuccau...........................ucuuuuucuuug.acuuu	16.8
83	gguacuuuu..............................uguucagauauacucucu	8.95
84	ugaucucu...............................auuuuuauuaua.ucccc	12.3
85	uggucuuu...............................caucuuuugcau.uacua	9.71
86	uguuuuuucaaa...........................ccucuaaauuuu.uauuu	17.2
87	aaaacuuuga.............................auacaagaauuu.aauug	5.47
88	aguccuauuuacguucu......................uccuuuuauuuu.ucucu	14.8
89	aaaauuuccaaaauggug.....................auuuuuauuuuu.acccu	10.6
90	uguagguua..............................uguucucaacua.uccug	4.58
91	uagacuuuaau............................ccuuuuuaucua.uuuuu	18.6
92	ugucuuuucuucg..........................uuguuggaguuc.ugaua	5.67
93	ugaacucuauuauuuuug.....................cccuuccauuau.ucuuu	13.2
94	ugaccuuuggcuuccacuc....................uucucuucuuuu.ucuua	16.9
95	uggucuag...............................aguccacauauu.uuuua	6.36
96	aauauuuuguc............................uguuuauaucuu.ugauu	12.4
97	uagccucuuu.............................uuccauuaucuu.uuuua	14.8
98	ugcucucucaacuu.........................uucuuuuaauuc.uuuua	16.8
99	uacuuucucgggua.........................acccuuuagcuu.uuucu	11.2
100	uauauuuucuga...........................auuuucucuauu.ucuug	16.6
101	ugaacuuccau............................uuuuugaauuug.aguuu	13.2
102	uacugucugaaugccg.......................uuuucuauuaug.auuuu	8.58
103	uggcuuuuuuugaaga.......................uuuuucccuuua.uucuu	14.4
104	ucauuuuua..............................ucgcuuguuugg.ucuca	5.03
105	ugaucucuuuuauuu........................acucaucauuau.ucuua	13.5
106	ugaaguuuucggag.........................uauuugaagauu.auuuc	8.78
107	aaaauucuua.............................augccauaguug.aauuu	8.88
108	uguuuuau...............................ccuccuuuauug.ucuuc	12.2
109	gguuuuuuccuuaa.........................auuuuucuuauu.acucu	12.1
110	aauauuuuagcguucuu......................aauucuuaauuu.ucuua	17
111	aauauuuugacug..........................cuucaguaauuc.uuuuu	14.4
112	ugaacuuuuag............................aaucugacacuu.uccuu	12.8
113	uaaucuuuuuc............................augcuuaaauau.ucuuu	15.4
114	ugacauuua..............................aucuuauagaua.uuccu	11
115	uaauuuuuu..............................cuuucagcuuuu.ucucu	17
116	uggacuuuguagagc........................uauuuucuacuc.accca	8.79
117	aacccuuuacguugauaucaguagggaugacgcaauaacacuucugaaaua.ucuga	2.82
118	aguacuuucuuug..........................cuuccaguauug.uuucu	13.3
119	uauucuuua..............................cguuuacaauaa.ucuua	14.5
120	agaacuaaagccaua........................uguuaaaagaau.uguuu	1.48
121	ugacuuuucuuuc..........................uucuuccaaaau.ucuuu	16.8
122	aaacguuuacga...........................acuuuaccuucu.ucuuu	10.2
123	aggauuuauucccaggaacagg.................cucuuuccuuau.ucuuu	9.17
124	aaaacuuuuaauaau........................uuuuuagagauu.uauuu	17.6
125	uggcaucu...............................ccuguucaacua.ucuuu	6.9
126	uguccuuuaauaaag........................aguucaaaaaua.ucuug	11.3
127	aaaacuauaggugcucc......................cguuuuucuuuu.uauua	12
128	aggauucucucuggcucacguaucgguaaagua......uuucuuuaacuacuucgc	3.87
129	uacuuucuguaaaacguguggg.................cucuaugauuau.uuuga	5.78
130	ucuccuuuccc............................augcauccuuuu.uuucu	8.45
131	uggauucuguauguuu.......................uuucuuuaauug.aauuu	15.8
132	uauucuuuaucg...........................uugcuuuaguuccagcuu	8.7
134	uaaucuuuggaaggua.......................cuuccucaacuc.aucuu	13.4
135	ugaagucugc.............................aaccuuuauuac.aucua	7.94
136	uaauuuuacuacc..........................auccauacauuu.ucuua	9.48
137	aagacucua..............................uccuuuacacuu.accug	9.26
138	acgacuuu...............................cuucuuuauuga.aauuc	9.02
139	agauuucaauuu...........................cuuuuggagacc.ucuuc	2.87
140	uguuuuuuucuug..........................cucucgcuuuug.ucuuu	14
141	aguauuucaaguagagcuagagcug..............cuuucauaucaa.uuuuu	10.1
142	aguacucuuu.............................uaucuucuacua.uguug	11.8
143	ugcaguucu..............................cuuuucgauuuucucugu	11.2
144	aauuuucuagugauaua......................cuuuucgaacuc.uuuuu	15
145	uaaucuccuauagauc.......................cuuucuaaucuc.uuuuu	12.6
146	agaauucucaauc..........................cuuuuucaguua.ucuug	17.4
147	ugacuucuuuccu..........................auuuuucuuuug.ucuuu	18.9
148	uaaacuuuucuuug.........................auucuacauauu.uuuuc	16.9
149	uaucuuuucaacugggaacuuaua...............aucuuugaauuu.uucuu	16.1
150	uggaauuccaga...........................cuuuuucugcgu.uuuug	6.79
151	ugaacuuucu.............................uuuuuacuacuu.uguuu	19.5
153	uaucuuuuugcuuguuacguuaguua.............auuccugaacuu.ucuuc	13.6
154	ucuuuuuuccauaaag.......................auuuuauauuuu.aaccu	11.9
155	aggucuuuugguaucua......................uucccaaaacuu.ucuag	9.69
156	uguuuuucu..............................accuuccaauuu.uccuu	14.7
157	uaaauuauuuugga.........................auuuuauuuuug.uccuu	14.4
158	agcauucuuugag..........................auuuuaguuuuu.accca	11.2
159	aguuguauugacugucacu....................auucuuuauuug.aucuc	8.97
160	ucacuuuuc..............................ucuuucuugcua.uuuug	10.9
161	ugaauuuuau.............................uuucugcaguug.auaug	9.74
162	agaacuauugagauucccaggauccguagca........uuuuuuuaaauccuauuu	11
163	uaaauuuuu..............................auuuuuucuuuacuuuug	17.9
164	uauccuuuagaauuagg......................auguucguuuac.ucuau	6.7
165	ugcauuuccgucuuugaa.....................cuguuuuauuau.ucuug	10.1
166	aggauuca...............................auuuuugaauuu.uucug	14.5
167	ugaacuacagggccguaga....................auucuucaacgu.uccuu	9.92
168	aguaguuucccc...........................agcuuuuauuuu.uuuau	15
169	aguaauuu...............................uucccaaauaua.ucuaa	9.93
170	agaccuuugg.............................uucucugauuaucucucu	15.7
171	aguucuuugauuucaaacu....................cuucuugaguuu.uuguu	13.8
172	agaucuuug..............................auuuuuuaguugcugcau	13.9
173	agacauuaagcucgc........................aauuaagagcug.auuuc	0.744
174	ugaacuucu..............................uuuuuugauccu.uuuua	16
175	ugaauuuuagg............................uucucugauuuc.ucuuu	20.6
176	ugacuuuu...............................ucuuuauuuuuu.aauga	13.5
177	uaauuucu...............................uuuuucucacuu.auuuu	17.6
178	ggaacuuuuguuu..........................uucccucaacua.ucuuu	14.1
179	aauacuuggag............................cguucuucguuu.uacua	5.77
182	aaccuucu...............................ucuccuuauuua.uguaa	10.5
183	ucaucuuuagag...........................acucuuuaacua.ucuuu	16.7
184	uguaguuc...............................ccuugggauuua.uuuuu	8.44
185	ugauuucauu.............................uccuuuccuuuucacuuu	11.2
186	aggucucuaaa............................cuucucucuugc.aucuu	7.01
187	aauccuuaacaacaugcaaggauga..............uuccuucuucuu.acuau	5.88
188	uauuuucuu..............................cguuuuuaauua.ucuuu	18.6
189	aaauguuucccucaag.......................cucuggcaacua.uuuuu	7.25
190	aaacuuuucucccc.........................uuuuucuaauug.ucuuu	19.5
191	aguuuuucuuguaa.........................uucucgguguuu.uguua	8.44
192	agauuuaug..............................auuuucgaaauu.uuuuc	16.2
193	ugaccuuuucuugug........................cuuuuuuaauau.ccuuu	14.3
194	agaaguuga..............................uauuugaauuug.ucccu	5.95
195	agauuuuuaauuaa.........................uuuuuuuaaauu.uuuug	21
196	aauaguuuaacu...........................uaccuagaacuc.uauau	8.15
197	uaaucucu...............................caucaacuuuua.uuuua	10.6
198	ugaacuuuuu.............................uaucuccuauuu.acuuu	16.2
199	aguuuuuucau............................uuuuuuacaagu.uauua	13.9

## Sheet: enrichment analysis sense mRNAs
Table S1. Functional enrichment analysis based on arCOG classification of directly SmAP1 associated mRNAs.
category	over_represented_pvalue	under_represented_pvalue	numDEInCat	numInCat	set	arcog_cat_name	arcog_cat_big	arcog_cat_big_name	plot_order	expected	deviation_from_expected
E	0.0322348	0.983832	17	150	sense	Amino acid transport and metabolism	3	METABOLISM	19	9.87687	1.72119
S	0.080976	0.948155	28	365	sense	Function unknown	4	POORLY CHARACTERIZED	26	24.0337	1.16503
G	0.128242	0.933269	10	92	sense	Carbohydrate transport and metabolism	3	METABOLISM	18	6.05782	1.65076
O	0.151996	0.933025	6	55	sense	Posttranslational modification, protein turnover, chaperones	2	CELLULAR PROCESSES AND SIGNALING	15	3.62152	1.65676
K	0.165761	0.915088	8	92	sense	Transcription	1	INFORMATION STORAGE AND PROCESSING	02	6.05782	1.32061
F	0.260429	0.873546	5	53	sense	Nucleotide transport and metabolism	3	METABOLISM	20	3.48983	1.43274
P	0.540135	0.644521	5	77	sense	Inorganic ion transport and metabolism	3	METABOLISM	23	5.07013	0.986168
U	0.552015	0.821149	1	12	sense	Intracellular trafficking, secretion, and vesicular transport	2	CELLULAR PROCESSES AND SIGNALING	14	0.79015	1.26558
H	0.56556	0.619426	5	79	sense	Coenzyme transport and metabolism	3	METABOLISM	21	5.20182	0.961202
M	0.575319	0.630531	4	57	sense	Cell wall/membrane/envelope biogenesis	2	CELLULAR PROCESSES AND SIGNALING	10	3.75321	1.06575
D	0.650822	0.730465	1	16	sense	Cell cycle control, cell division, chromosome partitioning	2	CELLULAR PROCESSES AND SIGNALING	06	1.05353	0.949187
C	0.706473	0.43984	7	116	sense	Energy production and conversion	3	METABOLISM	17	7.63812	0.916456
L	0.817527	0.322607	5	97	sense	Replication, recombination and repair	1	INFORMATION STORAGE AND PROCESSING	01	6.38704	0.782835
V	0.824158	0.329592	4	89	sense	Defense mechanisms	2	CELLULAR PROCESSES AND SIGNALING	08	5.86028	0.682561
I	0.837081	0.470898	1	27	sense	Lipid transport and metabolism	3	METABOLISM	22	1.77784	0.562481
J	0.976466	0.0546079	6	176	sense	Translation, ribosomal structure and biogenesis	1	INFORMATION STORAGE AND PROCESSING	03	11.5889	0.517738
R	0.988851	0.0240109	10	268	sense	General function prediction only	4	POORLY CHARACTERIZED	25	17.6467	0.566679
N	1	0.294851	0	18	sense	Cell motility	2	CELLULAR PROCESSES AND SIGNALING	11	1.18522	0
Q	1	0.396328	0	15	sense	Secondary metabolites biosynthesis, transport and catabolism	3	METABOLISM	24	0.987687	0
T	1	0.423717	0	14	sense	Signal transduction mechanisms	2	CELLULAR PROCESSES AND SIGNALING	09	0.921842	0

[truncated: 1 more sheets: enrichment analysis asRNA mRNAs]
